# Supplementary material for: Whole‐Transcriptome RNA Sequencing Reveals Significant Differentially Expressed mRNAs, miRNAs, and lncRNAs and Related Regulating Biological Pathways in the Peripheral Blood of COVID‐19 Patients
Source: Hindawi journal article supplement (doi:10.1155/2021/6635925), 2021-01-01
Supplement: f1 [file 6635925.f1.zip]

**Table S1 The differentially expressed mRNAs of peripheral blood samples in COVID-19 patients**

| Upregulated DE mRNAs |             |             |           |        |           |           |           |
|----------------------|-------------|-------------|-----------|--------|-----------|-----------|-----------|
| Gene_id              | Gene_name   | Xloc_id     | trans_len | EggNOG | Pfam      | CNCI      | CPC2      |
| MSTRG.231290.8       | ALG13       | XLOC_239470 | 1717      | coding | coding    | noncoding | noncoding |
| MSTRG.316.1          | CDK11B      | XLOC_000115 | 213       | coding | noncoding | noncoding | noncoding |
| NR_135061.1          | EXOSC10-AS1 | XLOC_000509 | 541       | coding | noncoding | coding    | noncoding |
| MSTRG.1019.2         | MTOR        | XLOC_000510 | 2307      | coding | coding    | coding    | noncoding |
| MSTRG.1019.3         | MTOR-AS1    | XLOC_000510 | 597       | coding | coding    | noncoding | noncoding |
| NM_001066.3          | TNFRSF1B    | XLOC_000569 | 3687      | coding | coding    | coding    | coding    |
| NM_012231.4          | PRDM2       | XLOC_000630 | 7957      | coding | coding    | coding    | coding    |
| MSTRG.1895.4         | EIF4G3      | XLOC_000981 | 6285      | coding | coding    | coding    | coding    |
| MSTRG.1895.5         | EIF4G3      | XLOC_000981 | 6169      | coding | coding    | coding    | coding    |
| MSTRG.1895.7         | EIF4G3      | XLOC_000981 | 6105      | coding | coding    | coding    | coding    |
| MSTRG.2026.4         | HNRNPR      | XLOC_001077 | 1866      | coding | coding    | noncoding | coding    |
| MSTRG.2059.1         | ELOA        | XLOC_001093 | 4190      | coding | coding    | coding    | coding    |
| MSTRG.2114.9         | SRSF10      | XLOC_001111 | 2885      | coding | coding    | noncoding | noncoding |
| NR_159380.1          | SRRM1       | XLOC_001154 | 3815      | coding | coding    | coding    | coding    |
| MSTRG.2334.6         | UBXN11      | XLOC_001244 | 2145      | coding | coding    | coding    | coding    |
| NM_001039477.2       | THEMIS2     | XLOC_001351 | 1240      | coding | coding    | coding    | coding    |
| MSTRG.2514.3         | RPA2        | XLOC_001357 | 1523      | coding | coding    | coding    | noncoding |
| XM_011541260.2       | SMPDL3B     | XLOC_001359 | 2636      | coding | coding    | coding    | coding    |
| MSTRG.2525.3         | DNAJC8      | XLOC_001370 | 1408      | coding | coding    | noncoding | noncoding |
| MSTRG.2963.3         | RNF19B      | XLOC_001585 | 2505      | coding | coding    | coding    | noncoding |
| MSTRG.2963.5         | RNF19B      | XLOC_001585 | 1069      | coding | noncoding | coding    | noncoding |
| MSTRG.3153.3         | SMIM12      | XLOC_001693 | 1991      | coding | coding    | coding    | noncoding |
| MSTRG.3198.1         | ZMYM4       | XLOC_001712 | 314       | coding | noncoding | noncoding | noncoding |
| MSTRG.3360.7         | STK40       | XLOC_001779 | 3792      | coding | coding    | coding    | coding    |
| MSTRG.3360.10        | STK40       | XLOC_001779 | 4373      | coding | coding    | coding    | coding    |
| MSTRG.3360.15        | LSM10       | XLOC_001779 | 1043      | coding | coding    | coding    | noncoding |
| MSTRG.3398.5         | SNIP1       | XLOC_001811 | 1699      | coding | noncoding | coding    | noncoding |
| MSTRG.3441.2         | FHL3        | XLOC_001826 | 1429      | coding | coding    | coding    | coding    |
| MSTRG.3441.3         | FHL3        | XLOC_001826 | 1612      | coding | coding    | coding    | coding    |
| MSTRG.3557.3         | PABPC4-AS1  | XLOC_001905 | 2997      | coding | coding    | coding    | noncoding |
| MSTRG.3557.6         | PABPC4-AS1  | XLOC_001905 | 2927      | coding | coding    | coding    | noncoding |
| MSTRG.3557.7         | PABPC4-AS1  | XLOC_001905 | 3102      | coding | coding    | coding    | coding    |
| MSTRG.3557.8         | PABPC4-AS1  | XLOC_001905 | 2547      | coding | coding    | coding    | noncoding |
| MSTRG.3557.9         | PABPC4-AS1  | XLOC_001905 | 2736      | coding | coding    | coding    | noncoding |
| NM_001350483.1       | CAP1        | XLOC_001937 | 2755      | coding | coding    | coding    | coding    |
| NM_001355226.2       | CCDC30      | XLOC_002157 | 5984      | coding | coding    | coding    | coding    |
| MSTRG.3857.2         | P3H1        | XLOC_002174 | 2460      | coding | coding    | coding    | noncoding |
| NM_001255.3          | CDC20       | XLOC_002202 | 1649      | coding | coding    | coding    | coding    |
| MSTRG.4339.1         | ZSWIM5      | XLOC_002330 | 1469      | coding | noncoding | noncoding | noncoding |

|                 |              |             |       |        |           |           |           |
|-----------------|--------------|-------------|-------|--------|-----------|-----------|-----------|
| MSTRG. 4458. 9  | MKNK1        | XLOC_002389 | 1791  | coding | noncoding | coding    | noncoding |
| MSTRG. 4522. 1  | PDZK1IP1     | XLOC_002421 | 907   | coding | coding    | coding    | coding    |
| MSTRG. 4585. 7  | STIL         | XLOC_002424 | 2066  | coding | coding    | noncoding | noncoding |
| MSTRG. 4943. 39 | NRDC         | XLOC_002565 | 2639  | coding | coding    | coding    | noncoding |
| MSTRG. 4926. 2  | TUT4         | XLOC_002596 | 5689  | coding | coding    | noncoding | noncoding |
| MSTRG. 5032. 3  | YIPF1        | XLOC_002670 | 1691  | coding | coding    | noncoding | noncoding |
| MSTRG. 5248. 7  | USP24        | XLOC_002725 | 8116  | coding | coding    | coding    | coding    |
| MSTRG. 5219. 1  | PLPP3        | XLOC_002764 | 238   | coding | noncoding | noncoding | noncoding |
| MSTRG. 5512. 1  | DAB1         | XLOC_002875 | 320   | coding | noncoding | noncoding | noncoding |
| MSTRG. 5365. 12 | OMA1         | XLOC_002988 | 1969  | coding | coding    | noncoding | noncoding |
| MSTRG. 5365. 11 | OMA1         | XLOC_002988 | 3547  | coding | coding    | noncoding | coding    |
| MSTRG. 5547. 2  | MYSM1        | XLOC_002999 | 7872  | coding | coding    | coding    | noncoding |
| NM_001017415. 1 | USP1         | XLOC_003148 | 3509  | coding | coding    | coding    | coding    |
| MSTRG. 5847. 1  | DOCK7        | XLOC_003159 | 270   | coding | noncoding | noncoding | noncoding |
| XM_005271274. 4 | EFCAB7       | XLOC_003199 | 4170  | coding | coding    | coding    | coding    |
| MSTRG. 6112. 8  | JAK1         | XLOC_003256 | 1088  | coding | coding    | noncoding | noncoding |
| MSTRG. 6132. 5  | JAK1         | XLOC_003269 | 4161  | coding | noncoding | coding    | noncoding |
| MSTRG. 6132. 11 | JAK1         | XLOC_003269 | 9647  | coding | coding    | noncoding | noncoding |
| NM_001077701. 3 | MIER1        | XLOC_003343 | 5394  | coding | coding    | coding    | coding    |
| MSTRG. 6466. 5  | GNG12-AS1    | XLOC_003385 | 8915  | coding | coding    | noncoding | noncoding |
| XM_017001886. 1 | LRRC7        | XLOC_003449 | 10184 | coding | coding    | coding    | coding    |
| MSTRG. 6532. 2  | HHLA3        | XLOC_003467 | 2126  | coding | coding    | coding    | noncoding |
| MSTRG. 6761. 1  | NEGR1        | XLOC_003535 | 366   | coding | noncoding | noncoding | noncoding |
| MSTRG. 6921. 2  | PIGK         | XLOC_003693 | 2577  | coding | coding    | noncoding | noncoding |
| MSTRG. 6945. 1  |              | XLOC_003714 | 497   | coding | noncoding | noncoding | noncoding |
| NM_006417. 5    | IFI44        | XLOC_003750 | 1682  | coding | coding    | coding    | coding    |
| MSTRG. 7474. 1  | LOC107985037 | XLOC_003875 | 453   | coding | noncoding | noncoding | noncoding |
| MSTRG. 7386. 21 | SPATA1       | XLOC_003993 | 2743  | coding | coding    | coding    | noncoding |
| MSTRG. 7408. 2  | SSX2IP       | XLOC_004000 | 2307  | coding | coding    | noncoding | noncoding |
| MSTRG. 7408. 3  | SSX2IP       | XLOC_004000 | 1844  | coding | coding    | noncoding | noncoding |
| MSTRG. 7679. 1  |              | XLOC_004062 | 251   | coding | noncoding | noncoding | noncoding |
| MSTRG. 7757. 4  | ODF2L        | XLOC_004094 | 2374  | coding | noncoding | coding    | noncoding |
| MSTRG. 7757. 8  | ODF2L        | XLOC_004094 | 1492  | coding | noncoding | noncoding | noncoding |
| MSTRG. 8320. 16 | GBP3         | XLOC_004266 | 3420  | coding | coding    | noncoding | noncoding |
| MSTRG. 8100. 2  | ZNF644       | XLOC_004388 | 9023  | coding | noncoding | coding    | noncoding |
| XR_001737461. 1 | CDC7         | XLOC_004403 | 3271  | coding | coding    | coding    | coding    |
| MSTRG. 8301. 1  | C1orf146     | XLOC_004433 | 224   | coding | noncoding | noncoding | noncoding |
| MSTRG. 8461. 2  | EVI5         | XLOC_004451 | 2599  | coding | coding    | coding    | noncoding |
| NR_146333. 1    | RPL5         | XLOC_004458 | 1012  | coding | coding    | coding    | coding    |
| MSTRG. 8637. 1  | CCDC18       | XLOC_004471 | 14747 | coding | coding    | coding    | coding    |
| MSTRG. 8584. 1  | BCAR3        | XLOC_004507 | 320   | coding | coding    | noncoding | noncoding |
| MSTRG. 8597. 1  | ARHGAP29     | XLOC_004530 | 411   | coding | coding    | noncoding | noncoding |

|                  |              |             |       |        |           |           |           |
|------------------|--------------|-------------|-------|--------|-----------|-----------|-----------|
| MSTRG. 9377. 2   | DPYD-AS1     | XLOC_004641 | 1565  | coding | coding    | noncoding | noncoding |
| XM_017001504. 1  | TRMT13       | XLOC_004713 | 4793  | coding | coding    | noncoding | coding    |
| MSTRG. 8972. 1   | LRRC39       | XLOC_004717 | 272   | coding | noncoding | noncoding | noncoding |
| MSTRG. 9064. 1   | LOC102723784 | XLOC_004828 | 555   | coding | noncoding | noncoding | noncoding |
| MSTRG. 9673. 2   | VAV3         | XLOC_004963 | 2100  | coding | coding    | coding    | noncoding |
| MSTRG. 9651. 3   | SORT1        | XLOC_005045 | 3331  | coding | coding    | coding    | noncoding |
| MSTRG. 9927. 6   | LRIF1        | XLOC_005136 | 2555  | coding | coding    | coding    | noncoding |
| MSTRG. 10016. 6  | CEPT1        | XLOC_005153 | 1943  | coding | coding    | coding    | noncoding |
| MSTRG. 10140. 2  | ST7L         | XLOC_005241 | 1364  | coding | coding    | noncoding | noncoding |
| MSTRG. 10140. 4  | ST7L         | XLOC_005241 | 885   | coding | coding    | noncoding | noncoding |
| MSTRG. 10312. 4  | SIKE1        | XLOC_005335 | 5227  | coding | coding    | coding    | noncoding |
| MSTRG. 10434. 1  | SLC22A15     | XLOC_005386 | 295   | coding | noncoding | noncoding | noncoding |
| MSTRG. 10805. 12 | NOTCH2       | XLOC_005582 | 9567  | coding | noncoding | noncoding | noncoding |
| MSTRG. 10801. 5  | SEC22B       | XLOC_005591 | 961   | coding | coding    | noncoding | noncoding |
| MSTRG. 11377. 1  | LOC100996724 | XLOC_005606 | 231   | coding | noncoding | coding    | noncoding |
| MSTRG. 11448. 1  | FAM72B       | XLOC_005658 | 342   | coding | coding    | noncoding | noncoding |
| MSTRG. 11029. 1  | HIST2H3PS2   | XLOC_005752 | 1931  | coding | coding    | coding    | noncoding |
| MSTRG. 11097. 19 | LOC100996740 | XLOC_005796 | 18038 | coding | noncoding | coding    | coding    |
| MSTRG. 11194. 3  | NBPF20       | XLOC_005802 | 434   | coding | noncoding | noncoding | noncoding |
| MSTRG. 11217. 2  | POLR3C       | XLOC_005811 | 3675  | coding | coding    | coding    | coding    |
| MSTRG. 11217. 3  | RNF115       | XLOC_005811 | 1288  | coding | coding    | noncoding | noncoding |
| MSTRG. 11218. 8  | PIAS3        | XLOC_005812 | 1388  | coding | coding    | coding    | noncoding |
| MSTRG. 11245. 6  | NBPF10       | XLOC_005836 | 1112  | coding | noncoding | noncoding | noncoding |
| MSTRG. 11245. 25 | NBPF10       | XLOC_005840 | 20592 | coding | coding    | coding    | coding    |
| MSTRG. 11245. 36 | NOTCH2NLA    | XLOC_005840 | 11906 | coding | coding    | coding    | noncoding |
| MSTRG. 11245. 38 | NOTCH2NLA    | XLOC_005840 | 2536  | coding | coding    | coding    | noncoding |
| MSTRG. 11286. 2  | FMO5         | XLOC_005878 | 1977  | coding | coding    | noncoding | noncoding |
| MSTRG. 11286. 3  | FMO5         | XLOC_005878 | 463   | coding | coding    | noncoding | coding    |
| MSTRG. 12121. 1  | NBPF14       | XLOC_005922 | 4581  | coding | coding    | coding    | noncoding |
| MSTRG. 12121. 16 | NBPF14       | XLOC_005922 | 4704  | coding | coding    | coding    | noncoding |
| MSTRG. 12121. 18 | NBPF14       | XLOC_005922 | 284   | coding | coding    | noncoding | noncoding |
| MSTRG. 12121. 35 | NBPF14       | XLOC_005922 | 2184  | coding | coding    | noncoding | noncoding |
| MSTRG. 12121. 43 | NOTCH2NLB    | XLOC_005922 | 13557 | coding | coding    | coding    | noncoding |
| NR_111930. 1     | LOC100132057 | XLOC_005931 | 1485  | coding | noncoding | noncoding | noncoding |
| MSTRG. 12143. 12 | LOC100132057 | XLOC_005931 | 5716  | coding | coding    | coding    | coding    |
| MSTRG. 12166. 1  |              | XLOC_005936 | 395   | coding | noncoding | noncoding | noncoding |
| MSTRG. 12198. 2  | PDE4DIP      | XLOC_005945 | 14742 | coding | coding    | noncoding | noncoding |
| NM_001304723. 1  | PLEKHO1      | XLOC_006033 | 2068  | coding | coding    | coding    | coding    |
| MSTRG. 11622. 4  | ARNT         | XLOC_006069 | 4537  | coding | coding    | noncoding | noncoding |
| MSTRG. 11622. 6  | ARNT         | XLOC_006069 | 4423  | coding | coding    | noncoding | noncoding |
| MSTRG. 11622. 5  | ARNT         | XLOC_006069 | 4426  | coding | coding    | noncoding | noncoding |
| MSTRG. 11695. 4  | SELENBP1     | XLOC_006111 | 1890  | coding | coding    | coding    | coding    |

|                  |              |             |       |        |           |           |           |
|------------------|--------------|-------------|-------|--------|-----------|-----------|-----------|
| MSTRG. 11977. 13 | CRTC2        | XLOC_006269 | 1866  | coding | coding    | coding    | noncoding |
| MSTRG. 11977. 12 | CRTC2        | XLOC_006269 | 1881  | coding | coding    | coding    | noncoding |
| NM_000565. 4     | IL6R         | XLOC_006295 | 5764  | coding | coding    | coding    | coding    |
| MSTRG. 12078. 6  | SHC1         | XLOC_006318 | 1986  | coding | coding    | coding    | noncoding |
| MSTRG. 12078. 7  | SHC1         | XLOC_006318 | 1741  | coding | coding    | noncoding | noncoding |
| NM_005227. 3     | EFNA4        | XLOC_006330 | 1254  | coding | coding    | coding    | coding    |
| NM_004428. 3     | EFNA1        | XLOC_006336 | 1552  | coding | coding    | coding    | coding    |
| NM_001287590. 2  | SLC50A1      | XLOC_006337 | 1340  | coding | coding    | coding    | coding    |
| MSTRG. 12113. 2  | TRIM46       | XLOC_006339 | 3603  | coding | coding    | coding    | coding    |
| MSTRG. 12313. 6  | CLK2         | XLOC_006347 | 1974  | coding | coding    | coding    | coding    |
| MSTRG. 12486. 6  | ASH1L        | XLOC_006352 | 5074  | coding | coding    | noncoding | noncoding |
| MSTRG. 12486. 24 | GON4L        | XLOC_006352 | 5819  | coding | noncoding | coding    | coding    |
| MSTRG. 12486. 27 | DAP3         | XLOC_006352 | 2597  | coding | noncoding | coding    | coding    |
| MSTRG. 12486. 58 | GON4L        | XLOC_006352 | 1463  | coding | noncoding | noncoding | noncoding |
| MSTRG. 12445. 5  | GLMP         | XLOC_006390 | 1595  | coding | coding    | noncoding | coding    |
| MSTRG. 12445. 4  | TMEM79       | XLOC_006390 | 3078  | coding | coding    | coding    | noncoding |
| MSTRG. 12461. 2  | MRPL24       | XLOC_006421 | 889   | coding | coding    | noncoding | noncoding |
| MSTRG. 12472. 1  | PRCC         | XLOC_006425 | 367   | coding | noncoding | noncoding | noncoding |
| XM_017000460. 1  | LRRC71       | XLOC_006430 | 2307  | coding | coding    | coding    | coding    |
| MSTRG. 12564. 3  | FCRL5        | XLOC_006457 | 1587  | coding | coding    | noncoding | noncoding |
| MSTRG. 12663. 6  | SPTA1        | XLOC_006504 | 3215  | coding | coding    | coding    | coding    |
| NM_152501. 5     | PYHIN1       | XLOC_006537 | 2088  | coding | coding    | coding    | coding    |
| MSTRG. 12758. 2  | TAGLN2       | XLOC_006619 | 1314  | coding | coding    | coding    | noncoding |
| MSTRG. 12887. 11 | LOC100287049 | XLOC_006636 | 5932  | coding | coding    | coding    | noncoding |
| XM_005245053. 5  | NCSTN        | XLOC_006638 | 2021  | coding | coding    | coding    | coding    |
| MSTRG. 12986. 2  | ARHGAP30     | XLOC_006679 | 7085  | coding | coding    | coding    | coding    |
| MSTRG. 13072. 11 | NIT1         | XLOC_006685 | 3888  | coding | coding    | coding    | noncoding |
| NM_016406. 4     | UFC1         | XLOC_006686 | 888   | coding | coding    | coding    | coding    |
| MSTRG. 13219. 3  | FCGR3B       | XLOC_006730 | 3875  | coding | coding    | noncoding | noncoding |
| MSTRG. 13219. 6  | FCGR3A       | XLOC_006730 | 3771  | coding | coding    | noncoding | noncoding |
| MSTRG. 13219. 10 | FCGR3B       | XLOC_006730 | 6049  | coding | coding    | coding    | noncoding |
| MSTRG. 13376. 1  | RGS5         | XLOC_006849 | 888   | coding | noncoding | noncoding | noncoding |
| XM_024447727. 1  | POU2F1       | XLOC_007003 | 14055 | coding | coding    | coding    | coding    |
| NM_001322923. 1  | RCSD1        | XLOC_007024 | 5392  | coding | coding    | coding    | coding    |
| MSTRG. 13805. 1  |              | XLOC_007102 | 278   | coding | noncoding | noncoding | noncoding |
| MSTRG. 14206. 35 | C1orf105     | XLOC_007293 | 1432  | coding | coding    | noncoding | noncoding |
| MSTRG. 14206. 37 | C1orf105     | XLOC_007293 | 1502  | coding | coding    | noncoding | noncoding |
| MSTRG. 14368. 1  | TNFSF4       | XLOC_007372 | 207   | coding | coding    | noncoding | noncoding |
| MSTRG. 14239. 4  | RC3H1        | XLOC_007443 | 5556  | coding | coding    | noncoding | coding    |
| MSTRG. 14239. 7  | RC3H1        | XLOC_007443 | 6354  | coding | coding    | noncoding | coding    |
| NM_001366447. 1  | RABGAP1L     | XLOC_007455 | 2790  | coding | coding    | coding    | coding    |
| NM_001330989. 2  | RABGAP1L     | XLOC_007455 | 7229  | coding | noncoding | coding    | coding    |

|                |          |             |       |        |           |           |           |
|----------------|----------|-------------|-------|--------|-----------|-----------|-----------|
| MSTRG.14702.1  | RABGAP1L | XLOC_007482 | 202   | coding | noncoding | noncoding | noncoding |
| MSTRG.14308.2  | KIAA0040 | XLOC_007563 | 6185  | coding | noncoding | coding    | noncoding |
| MSTRG.14308.1  | KIAA0040 | XLOC_007563 | 6259  | coding | noncoding | noncoding | noncoding |
| MSTRG.14869.17 | COP1     | XLOC_007604 | 5532  | coding | coding    | coding    | noncoding |
| MSTRG.14956.4  | TOR1AIP2 | XLOC_007740 | 2368  | coding | coding    | noncoding | coding    |
| MSTRG.15017.1  | LHX4     | XLOC_007773 | 281   | coding | noncoding | noncoding | noncoding |
| MSTRG.15354.1  |          | XLOC_007939 | 303   | coding | noncoding | noncoding | noncoding |
| MSTRG.15659.10 | PRG4     | XLOC_008043 | 7866  | coding | coding    | coding    | coding    |
| XM_024449332.1 | RO60     | XLOC_008271 | 9013  | coding | coding    | coding    | coding    |
| XM_011509209.1 | NEK7     | XLOC_008463 | 3686  | coding | coding    | coding    | coding    |
| NM_080921.3    | PTPRC    | XLOC_008513 | 4946  | coding | coding    | coding    | coding    |
| MSTRG.16509.4  | KIF14    | XLOC_008587 | 987   | coding | noncoding | noncoding | noncoding |
| MSTRG.16517.1  | DDX59    | XLOC_008592 | 1977  | coding | coding    | coding    | noncoding |
| MSTRG.16630.1  | UBE2T    | XLOC_008668 | 342   | coding | noncoding | noncoding | noncoding |
| MSTRG.17126.1  |          | XLOC_008835 | 321   | coding | noncoding | noncoding | noncoding |
| MSTRG.17453.1  |          | XLOC_008991 | 232   | coding | noncoding | noncoding | noncoding |
| MSTRG.17857.1  | CD46     | XLOC_009059 | 286   | coding | noncoding | noncoding | noncoding |
| MSTRG.18405.5  | RAB3GAP2 | XLOC_009550 | 7289  | coding | coding    | coding    | noncoding |
| XM_011509903.3 | MARC1    | XLOC_009566 | 2670  | coding | coding    | coding    | coding    |
| MSTRG.18547.2  | DUSP10   | XLOC_009601 | 1155  | coding | coding    | coding    | coding    |
| MSTRG.18836.4  | CNIH3    | XLOC_009770 | 8609  | coding | coding    | coding    | coding    |
| MSTRG.18836.5  | CNIH3    | XLOC_009770 | 7131  | coding | coding    | coding    | coding    |
| MSTRG.18836.9  | WDR26    | XLOC_009770 | 1854  | coding | coding    | coding    | noncoding |
| MSTRG.18897.34 | LBR      | XLOC_009778 | 3996  | coding | coding    | noncoding | noncoding |
| MSTRG.18917.1  | DNAH14   | XLOC_009786 | 785   | coding | noncoding | noncoding | noncoding |
| MSTRG.18958.7  | TMEM63A  | XLOC_009804 | 4748  | coding | coding    | coding    | coding    |
| MSTRG.19007.2  | ITPKB    | XLOC_009841 | 6894  | coding | coding    | coding    | coding    |
| MSTRG.19061.8  | SNAP47   | XLOC_009866 | 4384  | coding | coding    | coding    | coding    |
| MSTRG.19219.5  | ABCB10   | XLOC_009969 | 2905  | coding | coding    | noncoding | noncoding |
| MSTRG.19219.4  | ABCB10   | XLOC_009969 | 2271  | coding | coding    | coding    | noncoding |
| MSTRG.19219.8  | ABCB10   | XLOC_009969 | 1953  | coding | coding    | noncoding | noncoding |
| MSTRG.19388.3  | TTC13    | XLOC_010042 | 3832  | coding | coding    | coding    | noncoding |
| MSTRG.19388.5  | TTC13    | XLOC_010042 | 2761  | coding | coding    | coding    | noncoding |
| MSTRG.19400.3  | C1orf131 | XLOC_010056 | 1285  | coding | coding    | noncoding | noncoding |
| NM_001164550.2 | DISC1    | XLOC_010078 | 2857  | coding | noncoding | coding    | coding    |
| MSTRG.19824.3  | PCNX2    | XLOC_010179 | 3772  | coding | noncoding | coding    | noncoding |
| MSTRG.19631.1  | TARBP1   | XLOC_010223 | 5359  | coding | noncoding | noncoding | noncoding |
| NM_001037277.1 | GGPS1    | XLOC_010269 | 2747  | coding | coding    | coding    | coding    |
| MSTRG.19888.1  | LYST     | XLOC_010279 | 15231 | coding | coding    | coding    | coding    |
| XM_024452537.1 | SDCCAG8  | XLOC_010488 | 7971  | coding | coding    | coding    | coding    |
| MSTRG.20414.4  | ADSS     | XLOC_010532 | 2416  | coding | coding    | coding    | noncoding |
| MSTRG.20414.7  | ADSS     | XLOC_010532 | 673   | coding | coding    | noncoding | noncoding |

|                  |           |             |       |        |           |           |           |
|------------------|-----------|-------------|-------|--------|-----------|-----------|-----------|
| MSTRG. 20553. 5  | AHCTF1    | XLOC_010592 | 7782  | coding | noncoding | noncoding | noncoding |
| MSTRG. 20553. 8  | AHCTF1    | XLOC_010592 | 5580  | coding | coding    | coding    | noncoding |
| MSTRG. 20553. 11 | AHCTF1    | XLOC_010592 | 927   | coding | coding    | noncoding | noncoding |
| MSTRG. 20754. 2  | SH3BP5L   | XLOC_010704 | 2978  | coding | coding    | coding    | noncoding |
| NM_001353642. 2  | NADK      | XLOC_010848 | 3296  | coding | coding    | coding    | coding    |
| XM_017001745. 1  | DNAJC11   | XLOC_011043 | 3146  | coding | coding    | coding    | coding    |
| NM_001561. 5     | TNFRSF9   | XLOC_011096 | 5993  | coding | noncoding | coding    | coding    |
| MSTRG. 626. 5    | PARK7     | XLOC_011098 | 815   | coding | coding    | noncoding | noncoding |
| NM_020248. 3     | CTNNBIP1  | XLOC_011196 | 3006  | coding | coding    | coding    | noncoding |
| MSTRG. 1073. 2   | TNFRSF8   | XLOC_011281 | 1822  | coding | noncoding | coding    | noncoding |
| MSTRG. 1200. 4   | DDI2      | XLOC_011428 | 4965  | coding | coding    | noncoding | noncoding |
| MSTRG. 1523. 6   | PADI4     | XLOC_011518 | 2994  | coding | coding    | coding    | coding    |
| MSTRG. 1601. 2   | ARHGEF10L | XLOC_011523 | 1512  | coding | coding    | coding    | noncoding |
| XM_011541185. 3  | TMCO4     | XLOC_011611 | 3112  | coding | coding    | coding    | coding    |
| NM_002167. 5     | ID3       | XLOC_011795 | 950   | coding | coding    | coding    | coding    |
| MSTRG. 2051. 3   | RPL11     | XLOC_011801 | 819   | coding | coding    | coding    | coding    |
| NR_135778. 1     | RSRP1     | XLOC_011890 | 2367  | coding | coding    | coding    | coding    |
| MSTRG. 2241. 2   | LDLRAP1   | XLOC_011897 | 4309  | coding | coding    | coding    | coding    |
| MSTRG. 2347. 3   | RPS6KA1   | XLOC_011946 | 3868  | coding | coding    | coding    | coding    |
| NM_001164721. 1  | PTAFR     | XLOC_012041 | 4191  | coding | coding    | coding    | coding    |
| MSTRG. 2530. 3   | PHACTR4   | XLOC_012047 | 1057  | coding | noncoding | coding    | noncoding |
| MSTRG. 2599. 1   | GMEB1     | XLOC_012060 | 2771  | coding | coding    | coding    | noncoding |
| MSTRG. 2599. 4   | GMEB1     | XLOC_012060 | 2276  | coding | coding    | coding    | coding    |
| XM_011542098. 2  | LAPTM5    | XLOC_012127 | 2072  | coding | coding    | coding    | coding    |
| MSTRG. 2778. 1   | PUM1      | XLOC_012144 | 447   | coding | noncoding | noncoding | noncoding |
| MSTRG. 2852. 1   | TMEM39B   | XLOC_012195 | 1772  | coding | coding    | coding    | coding    |
| NM_001300826. 2  | RNF19B    | XLOC_012239 | 2677  | coding | coding    | coding    | coding    |
| MSTRG. 2988. 2   | ZNF362    | XLOC_012273 | 1623  | coding | coding    | coding    | coding    |
| MSTRG. 3292. 5   | AGO3      | XLOC_012383 | 1472  | coding | coding    | noncoding | noncoding |
| MSTRG. 3350. 7   | THRAP3    | XLOC_012398 | 3668  | coding | coding    | coding    | noncoding |
| MSTRG. 3350. 10  | THRAP3    | XLOC_012398 | 6062  | coding | coding    | coding    | noncoding |
| MSTRG. 3365. 1   | STK40     | XLOC_012409 | 283   | coding | noncoding | noncoding | noncoding |
| MSTRG. 3666. 2   | MACF1     | XLOC_012563 | 4786  | coding | coding    | noncoding | noncoding |
| MSTRG. 3666. 18  | MACF1     | XLOC_012563 | 24918 | coding | coding    | coding    | coding    |
| MSTRG. 3574. 4   | BMP8B     | XLOC_012581 | 1154  | coding | coding    | noncoding | noncoding |
| MSTRG. 3608. 5   | RLF       | XLOC_012602 | 2745  | coding | coding    | noncoding | noncoding |
| MSTRG. 3701. 14  | SMAP2     | XLOC_012607 | 10173 | coding | noncoding | coding    | noncoding |
| MSTRG. 3905. 5   | CCDC30    | XLOC_012731 | 1206  | coding | coding    | coding    | noncoding |
| MSTRG. 3876. 4   | ZNF691    | XLOC_012762 | 1525  | coding | coding    | coding    | noncoding |
| MSTRG. 4348. 3   | AKR1A1    | XLOC_012911 | 1298  | coding | coding    | noncoding | noncoding |
| MSTRG. 4944. 7   | OSBPL9    | XLOC_013177 | 1535  | coding | coding    | noncoding | noncoding |
| XM_006710599. 3  | FAM151A   | XLOC_013298 | 2054  | coding | coding    | coding    | coding    |

|                  |              |             |       |        |           |           |           |
|------------------|--------------|-------------|-------|--------|-----------|-----------|-----------|
| MSTRG. 5853. 1   | ANGPTL3      | XLOC_013628 | 321   | coding | noncoding | noncoding | noncoding |
| MSTRG. 6082. 11  | DNAJC6       | XLOC_013751 | 1670  | coding | coding    | noncoding | noncoding |
| MSTRG. 6167. 1   | IL23R        | XLOC_013875 | 623   | coding | noncoding | noncoding | noncoding |
| MSTRG. 6357. 1   | IL12RB2      | XLOC_013888 | 228   | coding | noncoding | noncoding | noncoding |
| MSTRG. 6648. 8   | SRSF11       | XLOC_014020 | 7140  | coding | noncoding | noncoding | noncoding |
| MSTRG. 7256. 1   | ST6GALNAC3   | XLOC_014179 | 1013  | coding | coding    | coding    | coding    |
| MSTRG. 7256. 3   | ST6GALNAC3   | XLOC_014179 | 860   | coding | coding    | noncoding | noncoding |
| MSTRG. 7151. 3   | MIGA1        | XLOC_014249 | 2012  | coding | coding    | coding    | coding    |
| MSTRG. 7229. 6   | IFI44L       | XLOC_014283 | 1216  | coding | noncoding | noncoding | noncoding |
| MSTRG. 7229. 13  | IFI44        | XLOC_014283 | 2718  | coding | noncoding | noncoding | noncoding |
| MSTRG. 7334. 3   | PRKACB       | XLOC_014456 | 1260  | coding | coding    | noncoding | noncoding |
| XM_024446127. 1  | LPAR3        | XLOC_014499 | 4009  | coding | coding    | coding    | coding    |
| XM_011541742. 1  | MCOLN3       | XLOC_014512 | 2984  | coding | coding    | coding    | coding    |
| MSTRG. 7612. 1   |              | XLOC_014519 | 307   | coding | noncoding | noncoding | noncoding |
| MSTRG. 7921. 1   |              | XLOC_014658 | 250   | coding | noncoding | noncoding | noncoding |
| NM_001162536. 3  | RBMXL1       | XLOC_014662 | 4756  | coding | coding    | coding    | coding    |
| MSTRG. 8342. 1   |              | XLOC_014683 | 221   | coding | coding    | noncoding | noncoding |
| MSTRG. 8387. 1   |              | XLOC_014723 | 288   | coding | noncoding | noncoding | noncoding |
| MSTRG. 8407. 1   |              | XLOC_014740 | 631   | coding | coding    | noncoding | noncoding |
| MSTRG. 8140. 3   | LRRC8B       | XLOC_014770 | 2887  | coding | coding    | noncoding | coding    |
| MSTRG. 8140. 4   | LRRC8B       | XLOC_014770 | 6410  | coding | coding    | noncoding | coding    |
| MSTRG. 7995. 1   | LOC107985744 | XLOC_014795 | 292   | coding | noncoding | noncoding | noncoding |
| MSTRG. 8046. 1   | LRRC8D       | XLOC_014800 | 7510  | coding | coding    | coding    | noncoding |
| MSTRG. 8273. 1   | BTBD8        | XLOC_014917 | 249   | coding | noncoding | noncoding | noncoding |
| MSTRG. 8673. 3   | ABCD3        | XLOC_015060 | 3410  | coding | coding    | noncoding | noncoding |
| MSTRG. 8773. 12  | TLCD4        | XLOC_015087 | 1037  | coding | coding    | coding    | noncoding |
| MSTRG. 8960. 3   | MFS14A       | XLOC_015356 | 1764  | coding | coding    | coding    | noncoding |
| MSTRG. 8987. 7   | RTCA         | XLOC_015373 | 3308  | coding | coding    | noncoding | noncoding |
| MSTRG. 9151. 2   | DPH5         | XLOC_015401 | 17591 | coding | coding    | coding    | coding    |
| MSTRG. 9569. 3   | PRPF38B      | XLOC_015629 | 2068  | coding | coding    | coding    | coding    |
| MSTRG. 9569. 10  | PRPF38B      | XLOC_015629 | 1105  | coding | coding    | noncoding | noncoding |
| MSTRG. 9829. 1   | KCNC4        | XLOC_015718 | 307   | coding | noncoding | noncoding | noncoding |
| MSTRG. 9872. 4   | RBM15        | XLOC_015730 | 5575  | coding | coding    | coding    | coding    |
| MSTRG. 9930. 1   | LRIF1        | XLOC_015772 | 467   | coding | noncoding | noncoding | noncoding |
| MSTRG. 9941. 1   | LRIF1        | XLOC_015780 | 313   | coding | noncoding | noncoding | noncoding |
| NM_019099. 5     | INKA2        | XLOC_015822 | 5951  | coding | coding    | coding    | coding    |
| MSTRG. 10205. 11 | HIPK1        | XLOC_015910 | 10317 | coding | coding    | coding    | coding    |
| MSTRG. 10293. 1  |              | XLOC_015947 | 473   | coding | noncoding | noncoding | noncoding |
| MSTRG. 10419. 17 | SLC22A15     | XLOC_016014 | 561   | coding | noncoding | noncoding | noncoding |
| MSTRG. 10584. 4  | MAN1A2       | XLOC_016091 | 3825  | coding | coding    | coding    | noncoding |
| MSTRG. 10584. 8  | MAN1A2       | XLOC_016091 | 1617  | coding | coding    | noncoding | noncoding |
| XR_946574. 1     | SPAG17       | XLOC_016119 | 7082  | coding | coding    | coding    | coding    |

|                  |              |             |       |        |           |           |           |
|------------------|--------------|-------------|-------|--------|-----------|-----------|-----------|
| MSTRG. 11366. 14 | NBPF8        | XLOC_016278 | 4109  | coding | coding    | noncoding | noncoding |
| MSTRG. 11366. 34 | NBPF26       | XLOC_016278 | 490   | coding | coding    | noncoding | noncoding |
| MSTRG. 10857. 1  |              | XLOC_016326 | 733   | coding | noncoding | noncoding | noncoding |
| MSTRG. 11014. 1  | LOC199882    | XLOC_016421 | 592   | coding | noncoding | noncoding | noncoding |
| NM_001364007. 1  | NOTCH2NLB    | XLOC_016662 | 8334  | coding | coding    | coding    | coding    |
| MSTRG. 12230. 8  | NBPF19       | XLOC_016707 | 14216 | coding | noncoding | coding    | coding    |
| MSTRG. 12230. 19 | NBPF19       | XLOC_016707 | 20790 | coding | coding    | coding    | coding    |
| MSTRG. 12230. 20 | NBPF19       | XLOC_016707 | 14326 | coding | noncoding | coding    | coding    |
| MSTRG. 12230. 24 | LOC653513    | XLOC_016707 | 5671  | coding | noncoding | coding    | noncoding |
| MSTRG. 12230. 27 | LOC653513    | XLOC_016707 | 4389  | coding | noncoding | coding    | noncoding |
| MSTRG. 12230. 28 | LOC653513    | XLOC_016707 | 4009  | coding | noncoding | coding    | noncoding |
| MSTRG. 12247. 11 | NBPF19       | XLOC_016710 | 11109 | coding | coding    | coding    | noncoding |
| MSTRG. 12247. 15 | NOTCH2NLC    | XLOC_016710 | 18155 | coding | noncoding | coding    | noncoding |
| MSTRG. 12247. 34 | NBPF19       | XLOC_016710 | 200   | coding | coding    | noncoding | noncoding |
| MSTRG. 12247. 35 | NBPF19       | XLOC_016710 | 2498  | coding | coding    | noncoding | coding    |
| MSTRG. 12247. 37 | NBPF19       | XLOC_016710 | 1949  | coding | coding    | noncoding | noncoding |
| MSTRG. 12247. 41 | NBPF19       | XLOC_016710 | 570   | coding | coding    | noncoding | noncoding |
| MSTRG. 11486. 1  | LOC102723955 | XLOC_016744 | 453   | coding | coding    | noncoding | noncoding |
| MSTRG. 11512. 3  | HIST2H2AB    | XLOC_016757 | 1061  | coding | coding    | coding    | coding    |
| MSTRG. 11541. 2  | VPS45        | XLOC_016771 | 2512  | coding | coding    | noncoding | noncoding |
| MSTRG. 11548. 4  | PLEKHO1      | XLOC_016773 | 3181  | coding | coding    | coding    | coding    |
| MSTRG. 11565. 5  | PRPF3        | XLOC_016783 | 2443  | coding | coding    | coding    | coding    |
| NM_182763. 2     | MCL1         | XLOC_016795 | 3837  | coding | noncoding | coding    | coding    |
| MSTRG. 11631. 8  | SETDB1       | XLOC_016825 | 4314  | coding | coding    | coding    | coding    |
| MSTRG. 11631. 9  | SETDB1       | XLOC_016825 | 4236  | coding | coding    | coding    | coding    |
| MSTRG. 11964. 2  | ATP8B2       | XLOC_017033 | 5364  | coding | coding    | coding    | coding    |
| XR_001737388. 2  | THBS3        | XLOC_017092 | 4957  | coding | coding    | coding    | coding    |
| MSTRG. 12321. 3  | RUSC1-AS1    | XLOC_017099 | 1102  | coding | coding    | coding    | noncoding |
| NM_001198906. 2  | YY1AP1       | XLOC_017126 | 2694  | coding | noncoding | coding    | coding    |
| XM_005245587. 3  | ARHGEF2      | XLOC_017140 | 4253  | coding | coding    | coding    | coding    |
| XM_011509453. 2  | HDGF         | XLOC_017206 | 2208  | coding | noncoding | coding    | coding    |
| NM_005240. 2     | ETV3         | XLOC_017231 | 1617  | coding | coding    | coding    | coding    |
| MSTRG. 12827. 1  | PYHIN1       | XLOC_017312 | 17332 | coding | coding    | noncoding | noncoding |
| MSTRG. 12827. 29 | IFI16        | XLOC_017312 | 2522  | coding | coding    | coding    | noncoding |
| MSTRG. 12827. 35 | LOC105371461 | XLOC_017312 | 7987  | coding | coding    | coding    | noncoding |
| MSTRG. 12827. 36 | IFI16        | XLOC_017312 | 6972  | coding | noncoding | coding    | noncoding |
| MSTRG. 12885. 2  | LOC729867    | XLOC_017371 | 2674  | coding | coding    | coding    | noncoding |
| XM_011510171. 2  | CD48         | XLOC_017432 | 1197  | coding | coding    | coding    | coding    |
| MSTRG. 13211. 1  | FCGR2A       | XLOC_017527 | 2882  | coding | coding    | noncoding | coding    |
| MSTRG. 13211. 4  | FCGR2A       | XLOC_017527 | 3358  | coding | coding    | noncoding | noncoding |
| MSTRG. 13211. 40 | FCGR2B       | XLOC_017531 | 1943  | coding | coding    | noncoding | noncoding |
| MSTRG. 13163. 2  | ATF6         | XLOC_017543 | 3561  | coding | coding    | noncoding | noncoding |

|                  |              |             |       |        |           |           |           |
|------------------|--------------|-------------|-------|--------|-----------|-----------|-----------|
| MSTRG. 13163. 11 | ATF6         | XLOC_017543 | 1718  | coding | coding    | coding    | noncoding |
| MSTRG. 13458. 1  | MGST3        | XLOC_017691 | 300   | coding | noncoding | noncoding | noncoding |
| MSTRG. 13570. 1  | TADA1        | XLOC_017739 | 8044  | coding | coding    | coding    | coding    |
| MSTRG. 13770. 2  | MPC2         | XLOC_017814 | 4731  | coding | coding    | coding    | noncoding |
| MSTRG. 13900. 7  | BLZF1        | XLOC_017891 | 1633  | coding | noncoding | noncoding | noncoding |
| MSTRG. 13929. 1  | SELL         | XLOC_017916 | 2474  | coding | coding    | coding    | coding    |
| MSTRG. 13957. 1  | SCYL3        | XLOC_017925 | 668   | coding | coding    | coding    | noncoding |
| MSTRG. 14089. 9  | PRRC2C       | XLOC_017998 | 8901  | coding | coding    | coding    | coding    |
| MSTRG. 14671. 23 | LOC105371622 | XLOC_018138 | 6209  | coding | noncoding | noncoding | noncoding |
| NM_014656. 3     | KIAA0040     | XLOC_018153 | 4548  | coding | noncoding | coding    | coding    |
| MSTRG. 14934. 1  |              | XLOC_018241 | 260   | coding | noncoding | noncoding | noncoding |
| MSTRG. 14789. 4  | TOR3A        | XLOC_018369 | 1906  | coding | coding    | coding    | coding    |
| MSTRG. 14962. 5  | TOR1AIP1     | XLOC_018396 | 3101  | coding | coding    | noncoding | noncoding |
| MSTRG. 14972. 2  | CEP350       | XLOC_018401 | 5604  | coding | noncoding | coding    | coding    |
| MSTRG. 15300. 8  | NPL          | XLOC_018562 | 2156  | coding | coding    | coding    | noncoding |
| MSTRG. 15300. 6  | NPL          | XLOC_018562 | 2540  | coding | coding    | coding    | noncoding |
| MSTRG. 15300. 11 | NPL          | XLOC_018562 | 2864  | coding | coding    | noncoding | noncoding |
| MSTRG. 15333. 8  | SMG7         | XLOC_018592 | 3640  | coding | coding    | coding    | noncoding |
| MSTRG. 15421. 3  | RNF2         | XLOC_018704 | 2694  | coding | coding    | noncoding | noncoding |
| MSTRG. 15585. 3  | SWT1         | XLOC_018711 | 3884  | coding | coding    | noncoding | noncoding |
| MSTRG. 15585. 4  | IVNS1ABP     | XLOC_018711 | 4564  | coding | coding    | noncoding | noncoding |
| MSTRG. 15585. 6  | SWT1         | XLOC_018711 | 3821  | coding | coding    | noncoding | noncoding |
| MSTRG. 15585. 11 | SWT1         | XLOC_018711 | 2698  | coding | coding    | noncoding | noncoding |
| MSTRG. 16719. 1  |              | XLOC_019000 | 285   | coding | noncoding | noncoding | noncoding |
| MSTRG. 16819. 1  |              | XLOC_019080 | 296   | coding | noncoding | noncoding | noncoding |
| XR_001738352. 1  | LOC107985242 | XLOC_019090 | 1899  | coding | noncoding | noncoding | noncoding |
| MSTRG. 16393. 1  | PTPRC        | XLOC_019264 | 31501 | coding | coding    | noncoding | noncoding |
| MSTRG. 16393. 2  | PTPRC        | XLOC_019264 | 11989 | coding | coding    | coding    | noncoding |
| MSTRG. 16393. 5  | PTPRC        | XLOC_019264 | 12338 | coding | coding    | noncoding | noncoding |
| MSTRG. 16393. 4  | PTPRC        | XLOC_019264 | 12319 | coding | coding    | noncoding | noncoding |
| MSTRG. 16393. 7  | PTPRC        | XLOC_019264 | 11048 | coding | coding    | noncoding | noncoding |
| XM_017001407. 1  | ADIPOR1      | XLOC_019442 | 2156  | coding | coding    | coding    | coding    |
| MSTRG. 17066. 17 | ZC3H11A      | XLOC_019483 | 1446  | coding | coding    | noncoding | noncoding |
| MSTRG. 17066. 23 | ZC3H11A      | XLOC_019483 | 12032 | coding | coding    | coding    | coding    |
| NM_001276320. 1  | YOD1         | XLOC_019688 | 6291  | coding | noncoding | coding    | coding    |
| MSTRG. 17469. 4  | CD55         | XLOC_019702 | 7689  | coding | coding    | noncoding | noncoding |
| MSTRG. 17817. 16 | CR1          | XLOC_019714 | 6179  | coding | coding    | noncoding | noncoding |
| MSTRG. 17817. 21 | CR1          | XLOC_019714 | 8362  | coding | coding    | noncoding | noncoding |
| MSTRG. 17817. 20 | CR1          | XLOC_019714 | 4091  | coding | coding    | noncoding | noncoding |
| MSTRG. 17794. 1  | RCOR3        | XLOC_019853 | 7471  | coding | noncoding | noncoding | noncoding |
| MSTRG. 18007. 7  | PPP2R5A      | XLOC_019911 | 1231  | coding | noncoding | coding    | coding    |
| MSTRG. 18007. 9  | PPP2R5A      | XLOC_019911 | 3851  | coding | noncoding | noncoding | noncoding |

|                |              |             |       |        |           |           |           |
|----------------|--------------|-------------|-------|--------|-----------|-----------|-----------|
| MSTRG.18007.10 | PPP2R5A      | XLOC_019911 | 6934  | coding | noncoding | noncoding | noncoding |
| MSTRG.18007.11 | PPP2R5A      | XLOC_019911 | 3712  | coding | noncoding | noncoding | noncoding |
| MSTRG.18519.3  | MARC1        | XLOC_020179 | 2137  | coding | coding    | coding    | noncoding |
| MSTRG.18793.1  | LOC100287497 | XLOC_020317 | 556   | coding | noncoding | noncoding | noncoding |
| MSTRG.18802.1  | FBXO28       | XLOC_020323 | 467   | coding | noncoding | noncoding | noncoding |
| MSTRG.18802.3  | DEGS1        | XLOC_020323 | 2051  | coding | coding    | coding    | noncoding |
| MSTRG.18829.4  | CNIH4        | XLOC_020336 | 3035  | coding | coding    | coding    | noncoding |
| XM_005273125.3 | LBR          | XLOC_020371 | 3650  | coding | coding    | coding    | coding    |
| MSTRG.18945.2  | H3F3A        | XLOC_020406 | 1167  | coding | coding    | coding    | noncoding |
| MSTRG.19453.2  | SPRTN        | XLOC_020685 | 1636  | coding | noncoding | noncoding | noncoding |
| MSTRG.19736.4  | DISC1        | XLOC_020725 | 1850  | coding | noncoding | coding    | noncoding |
| MSTRG.19796.1  | LOC105373171 | XLOC_020733 | 258   | coding | noncoding | noncoding | noncoding |
| NR_125961.1    | COA6-AS1     | XLOC_020827 | 575   | coding | noncoding | noncoding | noncoding |
| NM_000081.3    | LYST         | XLOC_020896 | 13497 | coding | coding    | coding    | coding    |
| MSTRG.19931.1  | EDARADD      | XLOC_020972 | 245   | coding | noncoding | noncoding | noncoding |
| MSTRG.20077.2  | MTR          | XLOC_020986 | 3180  | coding | coding    | coding    | coding    |
| MSTRG.20077.6  | MTR          | XLOC_020986 | 3746  | coding | coding    | coding    | coding    |
| MSTRG.20226.1  | EXO1         | XLOC_021108 | 248   | coding | noncoding | noncoding | noncoding |
| MSTRG.20227.1  | EXO1         | XLOC_021109 | 270   | coding | noncoding | noncoding | noncoding |
| MSTRG.20358.1  | SDCCAG8      | XLOC_021142 | 340   | coding | noncoding | noncoding | noncoding |
| MSTRG.20530.5  | CNST         | XLOC_021367 | 2421  | coding | noncoding | coding    | noncoding |
| MSTRG.20530.10 | CNST         | XLOC_021367 | 3723  | coding | coding    | coding    | noncoding |
| MSTRG.20522.2  | SCCPDH       | XLOC_021374 | 1204  | coding | coding    | coding    | noncoding |
| XR_426916.2    | AHCTF1       | XLOC_021380 | 8478  | coding | coding    | coding    | coding    |
| MSTRG.21504.11 | RSAD2        | XLOC_021725 | 3116  | coding | coding    | coding    | coding    |
| NM_001039362.2 | ATP6V1C2     | XLOC_021964 | 3259  | coding | coding    | coding    | coding    |
| MSTRG.21989.3  | NBAS         | XLOC_022117 | 1370  | coding | noncoding | noncoding | noncoding |
| MSTRG.21989.6  | NBAS         | XLOC_022117 | 4754  | coding | coding    | coding    | noncoding |
| MSTRG.22055.4  | FAM49A       | XLOC_022159 | 10425 | coding | coding    | noncoding | noncoding |
| MSTRG.22055.3  | FAM49A       | XLOC_022159 | 23202 | coding | coding    | coding    | noncoding |
| MSTRG.22055.5  | FAM49A       | XLOC_022159 | 23137 | coding | coding    | coding    | noncoding |
| MSTRG.22055.12 | FAM49A       | XLOC_022159 | 25237 | coding | noncoding | coding    | noncoding |
| MSTRG.22411.1  |              | XLOC_022287 | 249   | coding | coding    | noncoding | noncoding |
| MSTRG.22444.1  |              | XLOC_022363 | 348   | coding | coding    | noncoding | noncoding |
| MSTRG.23058.1  | ATAD2B       | XLOC_022485 | 899   | coding | noncoding | noncoding | noncoding |
| MSTRG.23062.2  | UBXN2A       | XLOC_022487 | 15707 | coding | coding    | coding    | coding    |
| MSTRG.23062.6  | ATAD2B       | XLOC_022487 | 6505  | coding | coding    | coding    | noncoding |
| MSTRG.23062.9  | ATAD2B       | XLOC_022487 | 4335  | coding | coding    | noncoding | noncoding |
| MSTRG.23062.12 | ATAD2B       | XLOC_022487 | 2738  | coding | coding    | coding    | noncoding |
| MSTRG.23062.13 | ATAD2B       | XLOC_022487 | 1464  | coding | noncoding | coding    | noncoding |
| NM_001281512.1 | HADHB        | XLOC_022667 | 2143  | coding | coding    | coding    | coding    |
| MSTRG.23318.2  | OTOF         | XLOC_022677 | 1098  | coding | coding    | coding    | noncoding |

|                  |              |             |       |        |           |           |           |
|------------------|--------------|-------------|-------|--------|-----------|-----------|-----------|
| MSTRG. 23318. 1  | OTOF         | XLOC_022677 | 5144  | coding | coding    | coding    | coding    |
| MSTRG. 23369. 3  | ABHD1        | XLOC_022706 | 3175  | coding | coding    | coding    | coding    |
| MSTRG. 23369. 2  | ABHD1        | XLOC_022706 | 3334  | coding | coding    | coding    | coding    |
| MSTRG. 23419. 5  | EIF2B4       | XLOC_022723 | 1443  | coding | coding    | coding    | noncoding |
| NM_001329113. 1  | BABAM2       | XLOC_022759 | 2032  | coding | coding    | coding    | coding    |
| NM_005253. 4     | FOSL2        | XLOC_022813 | 6713  | coding | coding    | coding    | coding    |
| NM_024692. 6     | CLIP4        | XLOC_022856 | 4299  | coding | coding    | coding    | coding    |
| XR_002959339. 1  | CLIP4        | XLOC_022856 | 5364  | coding | coding    | coding    | coding    |
| MSTRG. 23831. 21 | SLC30A6      | XLOC_023016 | 5663  | coding | coding    | coding    | coding    |
| XM_017004558. 1  | BIRC6        | XLOC_023021 | 15743 | coding | coding    | coding    | coding    |
| MSTRG. 24171. 1  | NDUFAF7      | XLOC_023149 | 4023  | coding | noncoding | noncoding | noncoding |
| MSTRG. 24250. 1  | LOC375196    | XLOC_023257 | 237   | coding | noncoding | coding    | noncoding |
| MSTRG. 24253. 12 | SOS1         | XLOC_023259 | 4255  | coding | noncoding | coding    | noncoding |
| MSTRG. 24758. 7  | SLC8A1       | XLOC_023309 | 4033  | coding | coding    | coding    | coding    |
| MSTRG. 24758. 26 | SLC8A1       | XLOC_023309 | 15975 | coding | coding    | noncoding | coding    |
| XR_001738710. 1  | EML4         | XLOC_023378 | 5597  | coding | coding    | coding    | coding    |
| MSTRG. 24859. 3  | LOC107985877 | XLOC_023458 | 5870  | coding | coding    | noncoding | noncoding |
| MSTRG. 24859. 6  | THADA        | XLOC_023458 | 5214  | coding | coding    | noncoding | noncoding |
| MSTRG. 25102. 8  | CAMKMT       | XLOC_023489 | 8623  | coding | coding    | coding    | coding    |
| MSTRG. 25102. 11 | CAMKMT       | XLOC_023489 | 3142  | coding | coding    | coding    | coding    |
| MSTRG. 24907. 7  | SRBD1        | XLOC_023516 | 2060  | coding | coding    | noncoding | noncoding |
| MSTRG. 25027. 1  | ATP6V1E2     | XLOC_023567 | 307   | coding | noncoding | noncoding | noncoding |
| MSTRG. 25133. 13 | FBXO11       | XLOC_023639 | 4112  | coding | coding    | noncoding | noncoding |
| XM_005264283. 2  | FOXN2        | XLOC_023676 | 5658  | coding | coding    | coding    | coding    |
| XM_006712002. 3  | FOXN2        | XLOC_023676 | 5354  | coding | coding    | coding    | coding    |
| MSTRG. 25641. 3  | ACYP2        | XLOC_023857 | 8681  | coding | coding    | coding    | coding    |
| MSTRG. 25532. 16 | RTN4         | XLOC_023883 | 8453  | coding | noncoding | noncoding | noncoding |
| NM_002954. 5     | RPS27A       | XLOC_023905 | 1068  | coding | coding    | coding    | coding    |
| MSTRG. 25603. 5  | CCDC88A      | XLOC_023907 | 3749  | coding | noncoding | noncoding | coding    |
| MSTRG. 25681. 3  | PPP4R3B      | XLOC_023914 | 5483  | coding | coding    | coding    | noncoding |
| MSTRG. 25681. 6  | PPP4R3B      | XLOC_023914 | 1301  | coding | coding    | noncoding | noncoding |
| MSTRG. 25894. 1  | REL          | XLOC_024160 | 276   | coding | noncoding | noncoding | noncoding |
| MSTRG. 25896. 2  | PUS10        | XLOC_024162 | 247   | coding | noncoding | noncoding | noncoding |
| MSTRG. 26169. 3  | AHSA2P       | XLOC_024171 | 14289 | coding | coding    | coding    | coding    |
| MSTRG. 26200. 5  | XPO1         | XLOC_024174 | 4407  | coding | coding    | noncoding | noncoding |
| MSTRG. 26311. 3  | SERTAD2      | XLOC_024322 | 4620  | coding | noncoding | noncoding | coding    |
| MSTRG. 26298. 1  | LINC02245    | XLOC_024340 | 305   | coding | noncoding | noncoding | noncoding |
| NM_001005386. 2  | ACTR2        | XLOC_024375 | 3934  | coding | coding    | coding    | coding    |
| NM_001364819. 1  | ARHGAP25     | XLOC_024515 | 2966  | coding | coding    | coding    | coding    |
| NM_001202514. 1  | MXD1         | XLOC_024614 | 5587  | coding | coding    | coding    | coding    |
| MSTRG. 26840. 4  | PCBP1-AS1    | XLOC_024622 | 841   | coding | coding    | noncoding | noncoding |
| MSTRG. 26884. 3  | TIA1         | XLOC_024652 | 4187  | coding | coding    | noncoding | noncoding |

|                |              |             |       |        |           |           |           |
|----------------|--------------|-------------|-------|--------|-----------|-----------|-----------|
| NM_014497.5    | ZNF638       | XLOC_024708 | 6487  | coding | coding    | coding    | coding    |
| MSTRG.27195.1  | ZNF638       | XLOC_024737 | 205   | coding | noncoding | noncoding | noncoding |
| MSTRG.27154.4  | TPRKB        | XLOC_024837 | 663   | coding | coding    | noncoding | noncoding |
| MSTRG.27807.6  | TRABD2A      | XLOC_025137 | 2762  | coding | coding    | noncoding | noncoding |
| MSTRG.27963.10 | TGOLN2       | XLOC_025160 | 5855  | coding | coding    | coding    | noncoding |
| MSTRG.28036.3  | ST3GAL5      | XLOC_025195 | 1536  | coding | coding    | coding    | noncoding |
| MSTRG.28427.5  | IGKC         | XLOC_025345 | 1284  | coding | coding    | coding    | coding    |
| MSTRG.28427.20 | IGKC         | XLOC_025345 | 879   | coding | coding    | coding    | coding    |
| MSTRG.28427.23 | IGKC         | XLOC_025345 | 918   | coding | coding    | coding    | coding    |
| MSTRG.28427.26 | IGKC         | XLOC_025345 | 928   | coding | coding    | coding    | coding    |
| MSTRG.28427.37 | IGKC         | XLOC_025345 | 1904  | coding | coding    | coding    | coding    |
| MSTRG.28427.42 | IGKC         | XLOC_025345 | 1017  | coding | coding    | coding    | coding    |
| NM_001319092.1 | ARID5A       | XLOC_025473 | 2549  | coding | coding    | coding    | coding    |
| MSTRG.28647.3  | KANSL3       | XLOC_025480 | 346   | coding | noncoding | noncoding | noncoding |
| MSTRG.28716.1  | LOC107985920 | XLOC_025536 | 270   | coding | coding    | noncoding | noncoding |
| MSTRG.28767.8  | ANKRD36B     | XLOC_025538 | 4403  | coding | coding    | coding    | noncoding |
| MSTRG.28767.13 | ANKRD36B     | XLOC_025538 | 1474  | coding | coding    | coding    | noncoding |
| MSTRG.28985.4  | UNC50        | XLOC_025598 | 5941  | coding | coding    | coding    | coding    |
| MSTRG.28985.6  | UNC50        | XLOC_025598 | 8877  | coding | coding    | coding    | coding    |
| MSTRG.28985.10 | MGAT4A       | XLOC_025598 | 5680  | coding | noncoding | noncoding | noncoding |
| MSTRG.28932.1  | MITD1        | XLOC_025642 | 1144  | coding | coding    | noncoding | noncoding |
| NM_015904.4    | EIF5B        | XLOC_025653 | 5741  | coding | coding    | coding    | coding    |
| MSTRG.29015.6  | REV1         | XLOC_025653 | 2446  | coding | coding    | coding    | noncoding |
| MSTRG.29015.7  | REV1         | XLOC_025653 | 2224  | coding | coding    | coding    | noncoding |
| MSTRG.29184.2  | RNF149       | XLOC_025708 | 2967  | coding | coding    | coding    | noncoding |
| MSTRG.29184.8  | CNOT11       | XLOC_025708 | 15853 | coding | coding    | coding    | noncoding |
| MSTRG.29184.21 | RNF149       | XLOC_025708 | 6390  | coding | coding    | coding    | noncoding |
| MSTRG.30035.10 | MIR4435-2HG  | XLOC_026171 | 2624  | coding | noncoding | noncoding | noncoding |
| MSTRG.30035.30 | MIR4435-2HG  | XLOC_026171 | 4484  | coding | noncoding | coding    | noncoding |
| MSTRG.30024.5  | ANAPC1       | XLOC_026185 | 3363  | coding | coding    | noncoding | noncoding |
| NM_173842.3    | IL1RN        | XLOC_026256 | 1704  | coding | coding    | coding    | coding    |
| MSTRG.30235.1  | PAX8         | XLOC_026267 | 380   | coding | noncoding | noncoding | noncoding |
| MSTRG.30551.7  | CCDC93       | XLOC_026426 | 4441  | coding | coding    | coding    | noncoding |
| MSTRG.31093.3  | BIN1         | XLOC_026684 | 1850  | coding | coding    | coding    | coding    |
| MSTRG.31361.1  | IMP4         | XLOC_026813 | 5315  | coding | coding    | coding    | coding    |
| MSTRG.31893.1  | TMEM163      | XLOC_026999 | 205   | coding | noncoding | noncoding | noncoding |
| MSTRG.31679.2  | DARS         | XLOC_027109 | 1947  | coding | coding    | noncoding | noncoding |
| MSTRG.31813.1  |              | XLOC_027196 | 442   | coding | noncoding | noncoding | noncoding |
| MSTRG.32185.1  |              | XLOC_027231 | 294   | coding | noncoding | noncoding | noncoding |
| MSTRG.32239.1  |              | XLOC_027276 | 507   | coding | noncoding | noncoding | noncoding |
| MSTRG.32689.3  | GTDC1        | XLOC_027631 | 2702  | coding | coding    | noncoding | noncoding |
| MSTRG.32434.1  | ZEB2         | XLOC_027633 | 50789 | coding | noncoding | coding    | coding    |

|                  |              |             |       |        |           |           |           |
|------------------|--------------|-------------|-------|--------|-----------|-----------|-----------|
| MSTRG. 32434. 2  | ZEB2         | XLOC_027633 | 51595 | coding | noncoding | coding    | coding    |
| MSTRG. 32434. 19 | ZEB2         | XLOC_027633 | 25107 | coding | noncoding | coding    | noncoding |
| MSTRG. 32434. 20 | ZEB2         | XLOC_027633 | 7340  | coding | noncoding | noncoding | noncoding |
| MSTRG. 32482. 1  | EPC2         | XLOC_027813 | 279   | coding | coding    | noncoding | noncoding |
| MSTRG. 32593. 2  | LOC101929231 | XLOC_027864 | 1112  | coding | coding    | noncoding | noncoding |
| MSTRG. 33386. 2  | CACNB4       | XLOC_027953 | 3099  | coding | coding    | noncoding | coding    |
| MSTRG. 32981. 1  | LINC01876    | XLOC_028078 | 303   | coding | noncoding | noncoding | noncoding |
| NM_000408. 5     | GPD2         | XLOC_028104 | 5812  | coding | coding    | coding    | coding    |
| MSTRG. 33437. 2  | ERMN         | XLOC_028140 | 690   | coding | noncoding | noncoding | noncoding |
| MSTRG. 34306. 4  | LOC643072    | XLOC_028256 | 10445 | coding | coding    | coding    | noncoding |
| MSTRG. 34306. 10 | BAZ2B        | XLOC_028256 | 6709  | coding | coding    | coding    | noncoding |
| MSTRG. 34306. 19 | LOC643072    | XLOC_028256 | 8437  | coding | coding    | coding    | noncoding |
| MSTRG. 34306. 29 | LOC643072    | XLOC_028256 | 5021  | coding | coding    | coding    | noncoding |
| XM_017004719. 1  | 7-Mar        | XLOC_028256 | 3373  | coding | coding    | coding    | coding    |
| XM_017004721. 1  | 7-Mar        | XLOC_028256 | 3311  | coding | coding    | coding    | coding    |
| MSTRG. 33939. 2  | DPP4         | XLOC_028361 | 576   | coding | coding    | noncoding | noncoding |
| MSTRG. 34174. 4  | GALNT3       | XLOC_028506 | 2455  | coding | coding    | noncoding | noncoding |
| NM_006063. 3     | KLHL41       | XLOC_028641 | 2460  | coding | coding    | coding    | coding    |
| MSTRG. 34358. 1  | PPIG         | XLOC_028647 | 278   | coding | noncoding | noncoding | noncoding |
| MSTRG. 34613. 2  | METTL8       | XLOC_028726 | 748   | coding | noncoding | noncoding | noncoding |
| MSTRG. 34680. 1  |              | XLOC_028753 | 214   | coding | noncoding | noncoding | noncoding |
| MSTRG. 35013. 11 | WIPF1        | XLOC_028884 | 24267 | coding | coding    | coding    | noncoding |
| MSTRG. 35013. 12 | WIPF1        | XLOC_028884 | 13742 | coding | coding    | coding    | noncoding |
| MSTRG. 35013. 15 | WIPF1        | XLOC_028884 | 8006  | coding | coding    | coding    | noncoding |
| MSTRG. 35013. 29 | WIPF1        | XLOC_028884 | 8497  | coding | noncoding | coding    | noncoding |
| MSTRG. 35099. 21 | NFE2L2       | XLOC_028952 | 2316  | coding | coding    | noncoding | noncoding |
| MSTRG. 35897. 9  | TTN-AS1      | XLOC_029016 | 8446  | coding | coding    | coding    | noncoding |
| NR_120594. 1     | LOC101927055 | XLOC_029026 | 1956  | coding | coding    | noncoding | noncoding |
| MSTRG. 35917. 7  | TTN          | XLOC_029026 | 6515  | coding | coding    | coding    | coding    |
| MSTRG. 35237. 2  | SESTD1       | XLOC_029030 | 3374  | coding | coding    | coding    | noncoding |
| XR_001738911. 2  | ITPRID2      | XLOC_029164 | 5606  | coding | coding    | coding    | coding    |
| MSTRG. 36053. 1  | LOC107985783 | XLOC_029286 | 957   | coding | noncoding | noncoding | noncoding |
| MSTRG. 36054. 1  | LOC107985783 | XLOC_029287 | 202   | coding | noncoding | noncoding | noncoding |
| MSTRG. 36093. 5  | LOC105373785 | XLOC_029320 | 1225  | coding | noncoding | noncoding | noncoding |
| MSTRG. 36135. 3  | ZC3H15       | XLOC_029331 | 1377  | coding | coding    | noncoding | coding    |
| NM_001353497. 1  | ASNSD1       | XLOC_029449 | 2417  | coding | coding    | coding    | coding    |
| NM_001042520. 1  | C2orf88      | XLOC_029464 | 3991  | coding | coding    | coding    | noncoding |
| MSTRG. 36204. 1  | C2orf88      | XLOC_029472 | 250   | coding | noncoding | noncoding | noncoding |
| MSTRG. 36327. 11 | GLS          | XLOC_029538 | 16631 | coding | coding    | coding    | coding    |
| MSTRG. 36327. 17 | STAT1        | XLOC_029538 | 2536  | coding | coding    | noncoding | coding    |
| MSTRG. 36327. 18 | STAT1        | XLOC_029538 | 6110  | coding | coding    | noncoding | noncoding |
| MSTRG. 36605. 2  | HECW2        | XLOC_029768 | 1698  | coding | coding    | noncoding | noncoding |

|                  |              |             |       |        |           |           |           |
|------------------|--------------|-------------|-------|--------|-----------|-----------|-----------|
| MSTRG. 36815. 9  | ANKRD44      | XLOC_029810 | 4828  | coding | coding    | coding    | coding    |
| MSTRG. 36815. 16 | ANKRD44      | XLOC_029810 | 10613 | coding | coding    | coding    | noncoding |
| MSTRG. 36732. 4  | HSPD1        | XLOC_029817 | 1011  | coding | coding    | coding    | coding    |
| MSTRG. 36851. 1  | FTCDNL1      | XLOC_029929 | 249   | coding | coding    | noncoding | noncoding |
| MSTRG. 36877. 2  | TYW5         | XLOC_029932 | 213   | coding | noncoding | noncoding | noncoding |
| MSTRG. 36890. 1  | KCTD18       | XLOC_029955 | 2214  | coding | coding    | noncoding | noncoding |
| MSTRG. 36998. 4  | PPIL3        | XLOC_029971 | 1033  | coding | coding    | noncoding | coding    |
| MSTRG. 37114. 2  | LOC105373835 | XLOC_029972 | 3287  | coding | coding    | noncoding | noncoding |
| MSTRG. 37114. 15 | LOC105373835 | XLOC_029972 | 5451  | coding | coding    | coding    | noncoding |
| NM_001127183. 4  | CFLAR        | XLOC_029972 | 14480 | coding | coding    | coding    | coding    |
| NM_005759. 6     | ABI2         | XLOC_030110 | 21925 | coding | coding    | coding    | coding    |
| XM_017003897. 1  | RUFY4        | XLOC_030799 | 4307  | coding | coding    | coding    | coding    |
| NM_001168298. 2  | CXCR2        | XLOC_030801 | 2656  | coding | coding    | coding    | coding    |
| MSTRG. 38589. 7  | TMBIM1       | XLOC_030811 | 2064  | coding | coding    | coding    | coding    |
| MSTRG. 38607. 1  | CATIP        | XLOC_030817 | 310   | coding | noncoding | noncoding | noncoding |
| XM_017005249. 2  | CNOT9        | XLOC_030826 | 1556  | coding | coding    | noncoding | coding    |
| MSTRG. 38725. 11 | TUBA4A       | XLOC_030871 | 1944  | coding | coding    | coding    | coding    |
| MSTRG. 38725. 12 | TUBA4A       | XLOC_030871 | 1171  | coding | coding    | coding    | noncoding |
| MSTRG. 39463. 13 | TRIP12       | XLOC_031236 | 1935  | coding | noncoding | coding    | coding    |
| MSTRG. 39435. 1  | SLC16A14     | XLOC_031246 | 286   | coding | noncoding | noncoding | noncoding |
| MSTRG. 39865. 2  | SP110        | XLOC_031254 | 11744 | coding | coding    | coding    | noncoding |
| MSTRG. 39865. 13 | SP110        | XLOC_031254 | 16653 | coding | coding    | coding    | noncoding |
| MSTRG. 39515. 5  | CAB39        | XLOC_031296 | 1156  | coding | coding    | coding    | coding    |
| NM_080678. 2     | UBE2F        | XLOC_031639 | 2206  | coding | coding    | coding    | coding    |
| MSTRG. 40417. 1  | ANKMY1       | XLOC_031747 | 724   | coding | coding    | noncoding | noncoding |
| MSTRG. 40467. 24 | SNED1        | XLOC_031787 | 2940  | coding | coding    | coding    | noncoding |
| MSTRG. 40570. 9  | SEPTIN2      | XLOC_031797 | 8321  | coding | coding    | coding    | coding    |
| MSTRG. 21302. 1  |              | XLOC_032210 | 279   | coding | noncoding | noncoding | noncoding |
| NM_001348743. 2  | KIDINS220    | XLOC_032214 | 8643  | coding | coding    | coding    | coding    |
| NM_001321265. 2  | MBOAT2       | XLOC_032231 | 7476  | coding | coding    | coding    | coding    |
| MSTRG. 21427. 3  | ADAM17       | XLOC_032266 | 1171  | coding | coding    | noncoding | noncoding |
| MSTRG. 21741. 1  |              | XLOC_032454 | 247   | coding | noncoding | noncoding | noncoding |
| XM_024453164. 1  | FAM49A       | XLOC_032547 | 4653  | coding | coding    | coding    | coding    |
| MSTRG. 22907. 8  | MFSD2B       | XLOC_033029 | 2375  | coding | coding    | coding    | coding    |
| MSTRG. 22916. 13 | FAM228B      | XLOC_033033 | 883   | coding | noncoding | noncoding | noncoding |
| MSTRG. 23444. 1  | ZNF512       | XLOC_033241 | 3916  | coding | coding    | coding    | noncoding |
| MSTRG. 23611. 8  | BABAM2-AS1   | XLOC_033252 | 1615  | coding | coding    | coding    | coding    |
| MSTRG. 23674. 2  | CLIP4        | XLOC_033321 | 338   | coding | noncoding | noncoding | noncoding |
| MSTRG. 23595. 4  | YPEL5        | XLOC_033333 | 2607  | coding | coding    | noncoding | noncoding |
| MSTRG. 23818. 3  | SPAST        | XLOC_033415 | 1849  | coding | coding    | coding    | noncoding |
| MSTRG. 24020. 15 | BIRC6        | XLOC_033420 | 5405  | coding | coding    | noncoding | noncoding |
| MSTRG. 24020. 18 | BIRC6        | XLOC_033420 | 14637 | coding | coding    | coding    | noncoding |

|                  |              |             |       |        |           |           |           |
|------------------|--------------|-------------|-------|--------|-----------|-----------|-----------|
| MSTRG. 23915. 1  | LTBP1        | XLOC_033434 | 5662  | coding | coding    | coding    | noncoding |
| MSTRG. 24174. 2  | NDUFAF7      | XLOC_033580 | 1271  | coding | noncoding | noncoding | noncoding |
| MSTRG. 24174. 5  | NDUFAF7      | XLOC_033580 | 2244  | coding | coding    | coding    | noncoding |
| MSTRG. 24470. 11 | CDC42EP3     | XLOC_033602 | 279   | coding | noncoding | noncoding | noncoding |
| XR_001739415. 1  | LOC107985872 | XLOC_033647 | 951   | coding | noncoding | noncoding | noncoding |
| XR_001739426. 1  | LOC107985873 | XLOC_033836 | 914   | coding | noncoding | noncoding | coding    |
| MSTRG. 24746. 6  | PPM1B        | XLOC_033954 | 1865  | coding | coding    | noncoding | noncoding |
| MSTRG. 25179. 6  | FOXN2        | XLOC_034138 | 3037  | coding | coding    | coding    | noncoding |
| MSTRG. 25888. 3  | REL          | XLOC_034501 | 10642 | coding | coding    | noncoding | noncoding |
| MSTRG. 25888. 4  | REL          | XLOC_034501 | 9587  | coding | coding    | noncoding | noncoding |
| XM_005264437. 3  | PELI1        | XLOC_034631 | 3384  | coding | coding    | noncoding | coding    |
| MSTRG. 26609. 10 |              | XLOC_034662 | 7013  | coding | noncoding | coding    | noncoding |
| MSTRG. 26609. 13 | LOC105374768 | XLOC_034662 | 15653 | coding | noncoding | noncoding | noncoding |
| MSTRG. 26609. 21 | LGALSL-DT    | XLOC_034662 | 9627  | coding | noncoding | noncoding | noncoding |
| MSTRG. 26609. 19 | MIR4433A     | XLOC_034662 | 2244  | coding | noncoding | noncoding | noncoding |
| MSTRG. 26609. 24 | LGALSL-DT    | XLOC_034662 | 3876  | coding | coding    | coding    | noncoding |
| NM_014755. 3     | SERTAD2      | XLOC_034676 | 5549  | coding | coding    | coding    | coding    |
| NM_001002755. 3  | NFU1         | XLOC_034843 | 1274  | coding | coding    | coding    | coding    |
| MSTRG. 27045. 2  | MXD1         | XLOC_034900 | 5438  | coding | coding    | coding    | noncoding |
| MSTRG. 26866. 1  |              | XLOC_034906 | 270   | coding | noncoding | noncoding | noncoding |
| MSTRG. 27167. 20 | ZNF638       | XLOC_034967 | 4178  | coding | coding    | noncoding | coding    |
| MSTRG. 27246. 1  | ALMS1        | XLOC_035056 | 323   | coding | noncoding | noncoding | noncoding |
| MSTRG. 27257. 1  | ALMS1P1      | XLOC_035061 | 267   | coding | coding    | noncoding | noncoding |
| MSTRG. 27231. 5  | LOC112268419 | XLOC_035073 | 1470  | coding | coding    | coding    | coding    |
| NM_001317110. 2  | MOB1A        | XLOC_035079 | 4893  | coding | coding    | noncoding | coding    |
| MSTRG. 27271. 2  | INO80B-WBP1  | XLOC_035090 | 2719  | coding | coding    | coding    | coding    |
| MSTRG. 27271. 5  | INO80B-WBP1  | XLOC_035090 | 1068  | coding | coding    | coding    | noncoding |
| MSTRG. 27839. 1  |              | XLOC_035147 | 278   | coding | noncoding | noncoding | noncoding |
| MSTRG. 27996. 3  | GGCX         | XLOC_035469 | 9613  | coding | coding    | coding    | coding    |
| MSTRG. 28073. 1  | PTCD3        | XLOC_035503 | 3929  | coding | coding    | noncoding | noncoding |
| NR_036454. 1     | CHMP3        | XLOC_035523 | 2951  | coding | coding    | coding    | coding    |
| MSTRG. 28112. 1  | ANAPC1P1     | XLOC_035554 | 303   | coding | coding    | noncoding | noncoding |
| MSTRG. 28311. 19 | LOC730268    | XLOC_035593 | 1809  | coding | noncoding | noncoding | noncoding |
| MSTRG. 28710. 1  |              | XLOC_035875 | 270   | coding | coding    | noncoding | noncoding |
| MSTRG. 28956. 9  | INPP4A       | XLOC_035955 | 7878  | coding | noncoding | coding    | noncoding |
| MSTRG. 28930. 1  | LIPT1        | XLOC_036009 | 1994  | coding | noncoding | noncoding | noncoding |
| MSTRG. 28930. 6  | LIPT1        | XLOC_036009 | 1249  | coding | noncoding | noncoding | noncoding |
| MSTRG. 29256. 6  | IL1R2        | XLOC_036144 | 1845  | coding | coding    | noncoding | noncoding |
| MSTRG. 29223. 1  | IL1RL1       | XLOC_036161 | 492   | coding | noncoding | noncoding | noncoding |
| NM_001144013. 1  | RGPD3        | XLOC_036331 | 5873  | coding | coding    | coding    | coding    |
| MSTRG. 29711. 5  | GCC2         | XLOC_036372 | 4829  | coding | coding    | coding    | coding    |
| MSTRG. 29725. 1  | LIMS1        | XLOC_036373 | 887   | coding | coding    | coding    | noncoding |

|                  |                 |             |       |        |           |           |           |
|------------------|-----------------|-------------|-------|--------|-----------|-----------|-----------|
| MSTRG. 29959. 1  | SH3RF3          | XLOC_036471 | 246   | coding | noncoding | noncoding | noncoding |
| MSTRG. 30082. 3  | TMEM87B         | XLOC_036606 | 4838  | coding | coding    | noncoding | noncoding |
| XM_024453174. 1  | ZC3H8           | XLOC_036623 | 1864  | coding | coding    | coding    | coding    |
| MSTRG. 30287. 4  | CBWD2           | XLOC_036716 | 965   | coding | coding    | noncoding | noncoding |
| MSTRG. 30638. 1  | STEAP3          | XLOC_036896 | 287   | coding | noncoding | noncoding | noncoding |
| MSTRG. 30738. 4  | RALB            | XLOC_036951 | 2662  | coding | coding    | noncoding | noncoding |
| MSTRG. 31354. 2  | MZT2B           | XLOC_037291 | 476   | coding | coding    | noncoding | noncoding |
| MSTRG. 31584. 1  | MAP3K19         | XLOC_037436 | 467   | coding | noncoding | noncoding | noncoding |
| MSTRG. 31895. 3  | ZRANB3          | XLOC_037438 | 3047  | coding | coding    | noncoding | noncoding |
| MSTRG. 31950. 3  | R3HDM1          | XLOC_037445 | 3172  | coding | coding    | noncoding | noncoding |
| MSTRG. 31630. 3  | LOC107985946    | XLOC_037446 | 4447  | coding | coding    | coding    | noncoding |
| MSTRG. 32248. 4  | SPOPL           | XLOC_037550 | 5636  | coding | coding    | coding    | coding    |
| MSTRG. 32248. 11 | SPOPL           | XLOC_037550 | 4064  | coding | coding    | coding    | noncoding |
| MSTRG. 33081. 6  | ARHGAP15        | XLOC_037652 | 2624  | coding | coding    | noncoding | noncoding |
| MSTRG. 33081. 7  | ARHGAP15        | XLOC_037652 | 23810 | coding | noncoding | noncoding | noncoding |
| MSTRG. 33081. 22 | ARHGAP15        | XLOC_037652 | 9928  | coding | coding    | noncoding | noncoding |
| MSTRG. 33081. 38 | ARHGAP15        | XLOC_037652 | 21450 | coding | noncoding | noncoding | noncoding |
| MSTRG. 33081. 43 | LOC105373654    | XLOC_037652 | 35968 | coding | noncoding | noncoding | noncoding |
| NM_001171653. 2  | ZEB2            | XLOC_037718 | 9193  | coding | coding    | coding    | coding    |
| MSTRG. 32429. 1  |                 | XLOC_037805 | 236   | coding | noncoding | noncoding | noncoding |
| MSTRG. 32525. 1  | KIF5C           | XLOC_037842 | 308   | coding | noncoding | noncoding | noncoding |
| MSTRG. 33041. 4  | GPD2            | XLOC_038131 | 741   | coding | noncoding | noncoding | noncoding |
| MSTRG. 33525. 1  |                 | XLOC_038165 | 546   | coding | coding    | noncoding | noncoding |
| MSTRG. 34308. 50 | LY75-CD302      | XLOC_038251 | 8989  | coding | coding    | coding    | coding    |
| MSTRG. 34308. 51 | LY75-CD302      | XLOC_038251 | 14058 | coding | coding    | coding    | coding    |
| MSTRG. 33792. 7  | TANK            | XLOC_038338 | 1704  | coding | coding    | noncoding | noncoding |
| MSTRG. 33776. 1  | PSMD14          | XLOC_038350 | 786   | coding | noncoding | noncoding | noncoding |
| MSTRG. 34072. 1  | KCNH7           | XLOC_038398 | 231   | coding | noncoding | noncoding | noncoding |
| NM_004482. 4     | GALNT3          | XLOC_038475 | 3436  | coding | coding    | coding    | coding    |
| MSTRG. 34318. 4  | DHRS9           | XLOC_038569 | 3569  | coding | coding    | noncoding | noncoding |
| MSTRG. 34373. 1  | PHOSPHO2-KLHL23 | XLOC_038591 | 2347  | coding | coding    | noncoding | noncoding |
| MSTRG. 34375. 1  | PHOSPHO2-KLHL23 | XLOC_038593 | 218   | coding | coding    | noncoding | noncoding |
| MSTRG. 34473. 2  | UBR3            | XLOC_038605 | 7503  | coding | coding    | coding    | coding    |
| MSTRG. 34626. 3  | DYNC112         | XLOC_038685 | 3255  | coding | coding    | noncoding | noncoding |
| MSTRG. 34679. 1  |                 | XLOC_038687 | 217   | coding | coding    | noncoding | noncoding |
| MSTRG. 34688. 1  |                 | XLOC_038691 | 328   | coding | noncoding | noncoding | noncoding |
| MSTRG. 34825. 1  | PDK1            | XLOC_038737 | 1579  | coding | coding    | coding    | noncoding |
| MSTRG. 34825. 7  | PDK1            | XLOC_038737 | 926   | coding | coding    | coding    | noncoding |
| MSTRG. 34859. 4  | SCRN3           | XLOC_038794 | 386   | coding | noncoding | noncoding | noncoding |
| MSTRG. 35898. 3  | TTN             | XLOC_038971 | 21798 | coding | coding    | coding    | coding    |
| MSTRG. 35898. 27 | TTN             | XLOC_038971 | 25874 | coding | coding    | noncoding | coding    |
| MSTRG. 35898. 32 | TTN             | XLOC_038971 | 1985  | coding | noncoding | noncoding | noncoding |

|                  |              |             |      |        |           |           |           |
|------------------|--------------|-------------|------|--------|-----------|-----------|-----------|
| MSTRG. 35290. 4  | UBE2E3       | XLOC_039062 | 1356 | coding | coding    | noncoding | noncoding |
| MSTRG. 35548. 1  |              | XLOC_039312 | 397  | coding | coding    | noncoding | noncoding |
| MSTRG. 36163. 1  | LOC105373793 | XLOC_039455 | 6620 | coding | coding    | coding    | noncoding |
| MSTRG. 36236. 2  | INPP1        | XLOC_039492 | 1546 | coding | coding    | coding    | noncoding |
| MSTRG. 36325. 7  | GLS          | XLOC_039530 | 6639 | coding | coding    | coding    | noncoding |
| MSTRG. 36325. 11 | GLS          | XLOC_039530 | 6937 | coding | coding    | coding    | noncoding |
| NM_007315. 3     | STAT1        | XLOC_039530 | 4308 | coding | coding    | coding    | coding    |
| NM_139266. 2     | STAT1        | XLOC_039530 | 2798 | coding | coding    | coding    | coding    |
| MSTRG. 36631. 5  | SLC39A10     | XLOC_039694 | 1946 | coding | noncoding | noncoding | noncoding |
| NM_001195144. 2  | ANKRD44      | XLOC_039737 | 6087 | coding | coding    | coding    | coding    |
| MSTRG. 36733. 5  | HSPE1        | XLOC_039758 | 275  | coding | coding    | noncoding | noncoding |
| NM_001284361. 2  | BOLL         | XLOC_039776 | 3285 | coding | coding    | coding    | coding    |
| MSTRG. 37152. 16 | CFLAR-AS1    | XLOC_039907 | 7777 | coding | coding    | coding    | noncoding |
| MSTRG. 37172. 13 | FLACC1       | XLOC_039912 | 6201 | coding | coding    | coding    | coding    |
| MSTRG. 37172. 12 | FLACC1       | XLOC_039912 | 5569 | coding | coding    | coding    | coding    |
| MSTRG. 37040. 1  |              | XLOC_039951 | 358  | coding | noncoding | noncoding | noncoding |
| MSTRG. 37200. 2  | FAM117B      | XLOC_039964 | 1970 | coding | coding    | noncoding | coding    |
| MSTRG. 37200. 3  | FAM117B      | XLOC_039964 | 3294 | coding | coding    | noncoding | coding    |
| MSTRG. 37196. 4  | CARF         | XLOC_039990 | 912  | coding | coding    | noncoding | noncoding |
| MSTRG. 37197. 1  |              | XLOC_039991 | 533  | coding | noncoding | noncoding | noncoding |
| NM_213589. 3     | RAPH1        | XLOC_040013 | 9699 | coding | coding    | coding    | coding    |
| MSTRG. 37401. 3  | EEF1B2       | XLOC_040119 | 841  | coding | coding    | coding    | noncoding |
| MSTRG. 37522. 1  | MDH1B        | XLOC_040145 | 8537 | coding | coding    | coding    | coding    |
| NM_003709. 4     | KLF7         | XLOC_040163 | 8365 | coding | coding    | coding    | coding    |
| MSTRG. 37913. 11 | CREB1        | XLOC_040211 | 6739 | coding | coding    | noncoding | noncoding |
| MSTRG. 37638. 5  | PIKFYVE      | XLOC_040239 | 1921 | coding | coding    | noncoding | noncoding |
| MSTRG. 38626. 2  | TTLL4        | XLOC_040660 | 5999 | coding | coding    | coding    | coding    |
| MSTRG. 38621. 1  |              | XLOC_040662 | 288  | coding | noncoding | noncoding | noncoding |
| MSTRG. 38726. 1  | STK16        | XLOC_040701 | 1223 | coding | coding    | coding    | noncoding |
| MSTRG. 38739. 5  | GMPPA        | XLOC_040717 | 1735 | coding | coding    | coding    | noncoding |
| MSTRG. 39371. 10 | RHBDD1       | XLOC_041021 | 4455 | coding | coding    | noncoding | noncoding |
| MSTRG. 39495. 1  | FBXO36       | XLOC_041137 | 245  | coding | coding    | noncoding | noncoding |
| NM_004509. 4     | SP110        | XLOC_041146 | 4013 | coding | coding    | coding    | coding    |
| MSTRG. 39882. 21 | LOC105373925 | XLOC_041161 | 6039 | coding | coding    | noncoding | coding    |
| MSTRG. 39882. 23 | LOC105373925 | XLOC_041161 | 1660 | coding | coding    | noncoding | coding    |
| MSTRG. 39905. 19 | SP100        | XLOC_041163 | 9371 | coding | coding    | noncoding | noncoding |
| MSTRG. 39653. 8  | EIF4E2       | XLOC_041252 | 4697 | coding | coding    | noncoding | noncoding |
| MSTRG. 39989. 3  | COPS8        | XLOC_041411 | 2386 | coding | coding    | noncoding | noncoding |
| MSTRG. 39989. 4  | COPS8        | XLOC_041411 | 321  | coding | coding    | noncoding | noncoding |
| MSTRG. 40193. 7  | LRRFIP1      | XLOC_041456 | 5311 | coding | coding    | coding    | noncoding |
| MSTRG. 40193. 12 | LRRFIP1      | XLOC_041456 | 1256 | coding | coding    | coding    | noncoding |
| MSTRG. 40576. 18 | SEPTIN2      | XLOC_041671 | 3502 | coding | coding    | noncoding | noncoding |

|                |              |             |       |        |           |           |           |
|----------------|--------------|-------------|-------|--------|-----------|-----------|-----------|
| MSTRG.40576.23 | SEPTIN2      | XLOC_041671 | 3880  | coding | coding    | coding    | noncoding |
| MSTRG.40576.24 | SEPTIN2      | XLOC_041671 | 3377  | coding | coding    | noncoding | noncoding |
| MSTRG.40513.1  | FARP2        | XLOC_041682 | 280   | coding | noncoding | noncoding | noncoding |
| MSTRG.41302.4  | SUMF1        | XLOC_041880 | 1360  | coding | coding    | noncoding | noncoding |
| MSTRG.41302.8  | SUMF1        | XLOC_041880 | 1052  | coding | coding    | noncoding | noncoding |
| XM_017006116.2 | THUMPD3      | XLOC_042093 | 3597  | coding | coding    | coding    | coding    |
| MSTRG.41152.3  | EMC3         | XLOC_042126 | 1548  | coding | coding    | noncoding | noncoding |
| MSTRG.41379.2  | SEC13        | XLOC_042144 | 1817  | coding | coding    | coding    | coding    |
| MSTRG.41439.1  | MKRN2        | XLOC_042209 | 8207  | coding | coding    | coding    | coding    |
| MSTRG.41439.9  | RAF1         | XLOC_042209 | 2780  | coding | coding    | noncoding | noncoding |
| MSTRG.41423.1  | RPL32        | XLOC_042211 | 541   | coding | coding    | noncoding | coding    |
| MSTRG.41423.3  | RPL32        | XLOC_042211 | 528   | coding | coding    | noncoding | coding    |
| MSTRG.41583.4  | NUP210       | XLOC_042250 | 7322  | coding | coding    | coding    | coding    |
| MSTRG.41674.1  | METTL6       | XLOC_042342 | 581   | coding | coding    | noncoding | noncoding |
| MSTRG.41828.21 | ANKRD28      | XLOC_042350 | 434   | coding | noncoding | noncoding | noncoding |
| MSTRG.41905.39 | OXNAD1       | XLOC_042386 | 3069  | coding | coding    | coding    | noncoding |
| NM_001144382.2 | PLCL2        | XLOC_042399 | 4161  | coding | coding    | coding    | coding    |
| MSTRG.42429.1  | TBC1D5       | XLOC_042432 | 13188 | coding | coding    | noncoding | noncoding |
| MSTRG.42050.7  | SATB1        | XLOC_042449 | 11739 | coding | coding    | coding    | noncoding |
| MSTRG.42050.11 | SATB1        | XLOC_042449 | 746   | coding | coding    | noncoding | noncoding |
| NM_002948.4    | RPL15        | XLOC_042649 | 2730  | coding | coding    | coding    | coding    |
| MSTRG.42615.1  | NGLY1        | XLOC_042693 | 1922  | coding | coding    | noncoding | noncoding |
| MSTRG.42615.3  | NGLY1        | XLOC_042693 | 1987  | coding | coding    | noncoding | noncoding |
| MSTRG.42695.5  | SLC4A7       | XLOC_042737 | 728   | coding | coding    | coding    | noncoding |
| MSTRG.43186.5  | TMPPE        | XLOC_042959 | 10493 | coding | coding    | coding    | noncoding |
| MSTRG.43204.32 | UBP1         | XLOC_042966 | 3933  | coding | coding    | coding    | noncoding |
| MSTRG.43256.3  | CLASP2       | XLOC_042970 | 3967  | coding | coding    | coding    | noncoding |
| MSTRG.43406.2  | TRANK1       | XLOC_043047 | 13260 | coding | noncoding | coding    | coding    |
| MSTRG.43672.10 | LOC112268444 | XLOC_043060 | 3162  | coding | noncoding | coding    | noncoding |
| MSTRG.43684.2  | LRRFIP2      | XLOC_043062 | 533   | coding | noncoding | noncoding | noncoding |
| XM_005265069.3 | GOLGA4       | XLOC_043066 | 7843  | coding | coding    | coding    | coding    |
| NR_144399.1    | WDR48        | XLOC_043154 | 3806  | coding | coding    | coding    | coding    |
| NM_001346225.2 | WDR48        | XLOC_043154 | 4079  | coding | coding    | coding    | coding    |
| NM_001304288.2 | RPSA         | XLOC_043175 | 1155  | coding | coding    | coding    | coding    |
| MSTRG.44122.1  | ULK4         | XLOC_043348 | 230   | coding | noncoding | noncoding | noncoding |
| MSTRG.44132.1  | ULK4         | XLOC_043358 | 736   | coding | coding    | noncoding | noncoding |
| MSTRG.44190.2  | ANO10        | XLOC_043469 | 1983  | coding | coding    | coding    | coding    |
| MSTRG.44190.3  | ANO10        | XLOC_043469 | 2078  | coding | coding    | coding    | coding    |
| MSTRG.44333.4  | LOC107986083 | XLOC_043560 | 1328  | coding | coding    | noncoding | noncoding |
| MSTRG.44411.1  | LTF          | XLOC_043623 | 5303  | coding | coding    | coding    | coding    |
| MSTRG.44577.6  | CCDC12       | XLOC_043651 | 784   | coding | coding    | noncoding | noncoding |
| MSTRG.44497.5  | SMARCC1      | XLOC_043680 | 320   | coding | coding    | noncoding | noncoding |

|                |              |             |       |        |           |           |           |
|----------------|--------------|-------------|-------|--------|-----------|-----------|-----------|
| MSTRG.44527.4  | NME6         | XLOC_043696 | 3108  | coding | coding    | noncoding | noncoding |
| MSTRG.44527.5  | NME6         | XLOC_043696 | 1554  | coding | coding    | coding    | noncoding |
| MSTRG.44618.3  | UQCRC1       | XLOC_043716 | 1184  | coding | coding    | coding    | noncoding |
| MSTRG.44640.6  | IP6K2        | XLOC_043726 | 3845  | coding | coding    | noncoding | noncoding |
| MSTRG.44640.7  | IP6K2        | XLOC_043726 | 1912  | coding | coding    | noncoding | noncoding |
| MSTRG.44640.9  | IP6K2        | XLOC_043726 | 1972  | coding | coding    | noncoding | noncoding |
| MSTRG.44688.5  | QRICH1       | XLOC_043746 | 2967  | coding | coding    | noncoding | noncoding |
| MSTRG.44704.4  | USP19        | XLOC_043749 | 689   | coding | noncoding | coding    | noncoding |
| MSTRG.44725.4  | RHOA         | XLOC_043766 | 2767  | coding | coding    | noncoding | noncoding |
| XM_017005503.1 | RBM5         | XLOC_043802 | 3113  | coding | coding    | coding    | coding    |
| XR_001740024.1 | PPM1M        | XLOC_043921 | 2279  | coding | coding    | coding    | coding    |
| XM_017005730.1 | GLYCTK       | XLOC_043922 | 1857  | coding | coding    | coding    | coding    |
| MSTRG.45168.2  | PBRM1        | XLOC_043940 | 7868  | coding | coding    | noncoding | coding    |
| MSTRG.45168.10 | PBRM1        | XLOC_043940 | 5392  | coding | coding    | noncoding | coding    |
| NM_001354679.2 | PRKCD        | XLOC_043979 | 2837  | coding | coding    | coding    | coding    |
| MSTRG.45456.1  | CCDC66       | XLOC_044069 | 9473  | coding | coding    | coding    | coding    |
| NM_001349489.1 | PXK          | XLOC_044151 | 3159  | coding | coding    | coding    | coding    |
| MSTRG.47145.1  | FHIT         | XLOC_044254 | 401   | coding | noncoding | noncoding | noncoding |
| MSTRG.45869.2  | THOC7        | XLOC_044386 | 1110  | coding | coding    | coding    | noncoding |
| MSTRG.46181.1  | LOC112267879 | XLOC_044490 | 221   | coding | noncoding | noncoding | noncoding |
| MSTRG.46067.1  | TAFA1        | XLOC_044530 | 226   | coding | noncoding | noncoding | noncoding |
| MSTRG.45961.2  | TMF1         | XLOC_044574 | 5605  | coding | coding    | coding    | coding    |
| MSTRG.45961.5  | TMF1         | XLOC_044574 | 3975  | coding | coding    | coding    | noncoding |
| MSTRG.46031.4  | FRMD4B       | XLOC_044580 | 4248  | coding | coding    | coding    | noncoding |
| MSTRG.47644.24 | FOXP1        | XLOC_044617 | 1392  | coding | noncoding | coding    | noncoding |
| MSTRG.47644.27 | FOXP1        | XLOC_044617 | 1200  | coding | coding    | noncoding | noncoding |
| MSTRG.47644.41 | EIF4E3       | XLOC_044617 | 15229 | coding | coding    | coding    | noncoding |
| MSTRG.46354.2  | RYBP         | XLOC_044663 | 4670  | coding | noncoding | noncoding | noncoding |
| MSTRG.46512.3  | MIR4273      | XLOC_044746 | 1765  | coding | coding    | coding    | noncoding |
| MSTRG.47333.1  | CGGBP1       | XLOC_045005 | 5036  | coding | noncoding | coding    | noncoding |
| MSTRG.47333.6  | CGGBP1       | XLOC_045005 | 6479  | coding | noncoding | coding    | noncoding |
| NM_001320399.1 | PCNP         | XLOC_045366 | 2497  | coding | coding    | coding    | coding    |
| MSTRG.48581.10 | CD47         | XLOC_045606 | 7608  | coding | coding    | noncoding | noncoding |
| MSTRG.48581.16 | CD47         | XLOC_045606 | 4874  | coding | coding    | noncoding | noncoding |
| MSTRG.48690.1  | ZBED2        | XLOC_045711 | 299   | coding | coding    | noncoding | noncoding |
| MSTRG.48769.1  |              | XLOC_045782 | 280   | coding | noncoding | noncoding | noncoding |
| MSTRG.48826.4  | LOC107986114 | XLOC_045792 | 5901  | coding | coding    | coding    | noncoding |
| MSTRG.48928.5  | USF3         | XLOC_045848 | 8133  | coding | coding    | coding    | coding    |
| XM_024453388.1 | TIGIT        | XLOC_045890 | 22608 | coding | coding    | coding    | coding    |
| MSTRG.49993.7  | ZBTB20-AS1   | XLOC_045890 | 4144  | coding | coding    | coding    | coding    |
| MSTRG.49993.10 | ZBTB20-AS1   | XLOC_045890 | 4471  | coding | coding    | coding    | coding    |
| MSTRG.49993.11 | ZBTB20-AS1   | XLOC_045890 | 2123  | coding | coding    | coding    | coding    |

|                |              |             |      |        |           |           |           |
|----------------|--------------|-------------|------|--------|-----------|-----------|-----------|
| MSTRG.49276.3  | TMEM39A      | XLOC_046037 | 2896 | coding | coding    | coding    | noncoding |
| MSTRG.49353.6  | GSK3B        | XLOC_046057 | 3645 | coding | coding    | coding    | noncoding |
| MSTRG.49353.8  | GSK3B        | XLOC_046057 | 3177 | coding | coding    | coding    | noncoding |
| MSTRG.49344.1  |              | XLOC_046089 | 367  | coding | noncoding | noncoding | noncoding |
| MSTRG.49348.2  | RABL3        | XLOC_046091 | 2023 | coding | coding    | noncoding | noncoding |
| MSTRG.49470.7  | GOLGB1       | XLOC_046122 | 4515 | coding | noncoding | coding    | noncoding |
| MSTRG.49526.4  | KPNA1        | XLOC_046172 | 2129 | coding | coding    | coding    | noncoding |
| MSTRG.49577.7  | PARP9        | XLOC_046176 | 4006 | coding | coding    | noncoding | noncoding |
| MSTRG.49577.12 | DTX3L        | XLOC_046176 | 8540 | coding | coding    | coding    | coding    |
| MSTRG.49690.4  | MYLK-AS1     | XLOC_046229 | 1421 | coding | coding    | coding    | noncoding |
| MSTRG.49676.1  | CCDC14       | XLOC_046244 | 3842 | coding | coding    | coding    | noncoding |
| MSTRG.49965.5  | ZXDC         | XLOC_046345 | 2654 | coding | coding    | coding    | coding    |
| MSTRG.50603.2  | TMCC1        | XLOC_046520 | 5151 | coding | noncoding | coding    | noncoding |
| MSTRG.50663.2  | PIK3R4       | XLOC_046557 | 3232 | coding | coding    | noncoding | noncoding |
| MSTRG.50705.2  | LOC105374114 | XLOC_046601 | 1734 | coding | coding    | noncoding | coding    |
| MSTRG.50922.2  | NPHP3-ACAD11 | XLOC_046676 | 3324 | coding | coding    | noncoding | noncoding |
| NR_163491.1    | SRPRB        | XLOC_046715 | 4087 | coding | coding    | coding    | coding    |
| NM_001353126.1 | CEP63        | XLOC_046746 | 5480 | coding | coding    | coding    | coding    |
| MSTRG.51118.8  | STAG1        | XLOC_046841 | 796  | coding | noncoding | noncoding | noncoding |
| NM_001190796.3 | NCK1         | XLOC_046854 | 4154 | coding | coding    | coding    | coding    |
| MSTRG.51190.1  | DZIP1L       | XLOC_046899 | 240  | coding | coding    | noncoding | noncoding |
| MSTRG.51191.1  |              | XLOC_046901 | 275  | coding | noncoding | noncoding | noncoding |
| MSTRG.51205.1  |              | XLOC_046925 | 387  | coding | noncoding | noncoding | noncoding |
| MSTRG.51275.2  | PIK3CB       | XLOC_046939 | 5711 | coding | coding    | coding    | noncoding |
| MSTRG.51527.4  | TFDP2        | XLOC_047082 | 3988 | coding | coding    | noncoding | noncoding |
| MSTRG.51527.5  | TFDP2        | XLOC_047082 | 4316 | coding | coding    | noncoding | noncoding |
| MSTRG.51548.4  | GK5          | XLOC_047087 | 2248 | coding | coding    | coding    | noncoding |
| MSTRG.51993.12 |              | XLOC_047251 | 294  | coding | noncoding | noncoding | noncoding |
| MSTRG.52019.2  | HLTF         | XLOC_047267 | 1099 | coding | noncoding | noncoding | noncoding |
| MSTRG.52223.3  | SIAH2        | XLOC_047411 | 2029 | coding | coding    | coding    | noncoding |
| MSTRG.52223.4  | SIAH2        | XLOC_047411 | 1761 | coding | coding    | coding    | noncoding |
| XM_011512848.2 | MBNL1        | XLOC_047501 | 5203 | coding | noncoding | coding    | coding    |
| MSTRG.52562.1  | LOC105374170 | XLOC_047602 | 311  | coding | noncoding | noncoding | noncoding |
| NM_007287.3    | MME          | XLOC_047640 | 5665 | coding | coding    | coding    | coding    |
| MSTRG.53154.2  | IFT80        | XLOC_047844 | 1762 | coding | coding    | noncoding | noncoding |
| MSTRG.53170.3  | TRIM59-IFT80 | XLOC_047849 | 1231 | coding | coding    | noncoding | noncoding |
| MSTRG.53209.3  | LINC02067    | XLOC_047921 | 561  | coding | coding    | noncoding | noncoding |
| MSTRG.53706.3  | PHC3         | XLOC_048145 | 7746 | coding | coding    | noncoding | noncoding |
| MSTRG.53706.11 | PHC3         | XLOC_048145 | 3167 | coding | coding    | coding    | coding    |
| MSTRG.53706.14 | PHC3         | XLOC_048145 | 3414 | coding | coding    | coding    | noncoding |
| XM_011512597.2 | ATP11B       | XLOC_048554 | 6882 | coding | coding    | coding    | coding    |
| MSTRG.54594.4  | KLHL6        | XLOC_048618 | 5717 | coding | coding    | coding    | noncoding |

|                  |             |             |      |        |           |           |           |
|------------------|-------------|-------------|------|--------|-----------|-----------|-----------|
| MSTRG. 54650. 3  | ABCC5       | XLOC_048643 | 7423 | coding | coding    | coding    | coding    |
| NM_001025205. 1  | AP2M1       | XLOC_048655 | 1934 | coding | coding    | coding    | coding    |
| MSTRG. 54727. 1  | EHHADH      | XLOC_048752 | 263  | coding | coding    | noncoding | noncoding |
| MSTRG. 54805. 5  | TRA2B       | XLOC_048777 | 2723 | coding | coding    | coding    | noncoding |
| MSTRG. 55625. 2  | ACAP2       | XLOC_049285 | 8896 | coding | coding    | coding    | noncoding |
| MSTRG. 55625. 3  | ACAP2       | XLOC_049285 | 3984 | coding | coding    | coding    | noncoding |
| MSTRG. 55728. 2  | TFRC        | XLOC_049330 | 4775 | coding | coding    | noncoding | noncoding |
| MSTRG. 55755. 2  | RNF168      | XLOC_049353 | 2797 | coding | coding    | coding    | noncoding |
| NM_017861. 4     | PIGX        | XLOC_049367 | 3038 | coding | coding    | coding    | coding    |
| MSTRG. 55905. 7  | NCBP2-AS1   | XLOC_049387 | 4003 | coding | coding    | noncoding | noncoding |
| MSTRG. 55999. 2  | DLG1        | XLOC_049402 | 5729 | coding | coding    | coding    | noncoding |
| MSTRG. 40761. 1  | CRBN        | XLOC_049506 | 7604 | coding | coding    | noncoding | noncoding |
| MSTRG. 40761. 3  | CRBN        | XLOC_049506 | 4670 | coding | coding    | noncoding | noncoding |
| XM_011533625. 3  | SUMF1       | XLOC_049546 | 1278 | coding | coding    | coding    | coding    |
| MSTRG. 41346. 1  | SETMAR      | XLOC_049563 | 925  | coding | noncoding | noncoding | noncoding |
| MSTRG. 40785. 3  | BHLHE40-AS1 | XLOC_049578 | 4744 | coding | coding    | noncoding | coding    |
| MSTRG. 41098. 16 | SRGAP3      | XLOC_049705 | 7474 | coding | coding    | coding    | coding    |
| MSTRG. 41091. 2  | MTMR14      | XLOC_049713 | 2143 | coding | noncoding | coding    | noncoding |
| MSTRG. 41371. 4  | TATDN2      | XLOC_049745 | 3079 | coding | coding    | coding    | coding    |
| MSTRG. 41375. 2  | GHRL        | XLOC_049746 | 3165 | coding | noncoding | noncoding | noncoding |
| MSTRG. 41560. 2  | ATG7        | XLOC_049780 | 3741 | coding | coding    | noncoding | coding    |
| MSTRG. 41560. 1  | VGLL4       | XLOC_049780 | 6961 | coding | coding    | coding    | coding    |
| MSTRG. 41440. 3  | RAF1        | XLOC_049808 | 6224 | coding | coding    | coding    | coding    |
| MSTRG. 41612. 4  | XPC         | XLOC_049901 | 2121 | coding | coding    | coding    | noncoding |
| MSTRG. 41641. 10 | GRIP2       | XLOC_049910 | 6060 | coding | coding    | coding    | noncoding |
| MSTRG. 41641. 12 | GRIP2       | XLOC_049910 | 7735 | coding | coding    | coding    | noncoding |
| MSTRG. 41687. 5  | CAPN7       | XLOC_049928 | 4854 | coding | coding    | coding    | noncoding |
| MSTRG. 41687. 9  | SH3BP5      | XLOC_049928 | 9245 | coding | coding    | coding    | noncoding |
| MSTRG. 41844. 7  | BTB         | XLOC_049941 | 243  | coding | noncoding | noncoding | noncoding |
| MSTRG. 41906. 3  | OXNAD1      | XLOC_050022 | 5712 | coding | coding    | coding    | noncoding |
| MSTRG. 41906. 8  | RFTN1       | XLOC_050022 | 3937 | coding | coding    | coding    | noncoding |
| MSTRG. 41906. 17 | RFTN1       | XLOC_050022 | 8096 | coding | coding    | noncoding | noncoding |
| MSTRG. 41804. 4  | PLCL2       | XLOC_050059 | 1534 | coding | noncoding | coding    | noncoding |
| MSTRG. 42134. 1  |             | XLOC_050300 | 215  | coding | noncoding | noncoding | noncoding |
| MSTRG. 42149. 1  |             | XLOC_050305 | 256  | coding | noncoding | noncoding | noncoding |
| MSTRG. 42192. 1  |             | XLOC_050343 | 349  | coding | noncoding | noncoding | noncoding |
| NM_001330700. 1  | TOP2B       | XLOC_050487 | 5485 | coding | coding    | coding    | coding    |
| XM_005265510. 4  | EOMES       | XLOC_050565 | 3530 | coding | coding    | coding    | coding    |
| MSTRG. 43180. 2  | CNOT10      | XLOC_050809 | 2479 | coding | noncoding | noncoding | noncoding |
| MSTRG. 43224. 1  |             | XLOC_050873 | 554  | coding | noncoding | noncoding | noncoding |
| MSTRG. 43535. 4  | EXOG        | XLOC_051112 | 1867 | coding | coding    | noncoding | noncoding |
| MSTRG. 43621. 3  | GORASP1     | XLOC_051128 | 7346 | coding | coding    | coding    | coding    |

|                |           |             |       |        |           |           |           |
|----------------|-----------|-------------|-------|--------|-----------|-----------|-----------|
| NM_001171171.1 | CX3CR1    | XLOC_051141 | 3256  | coding | coding    | coding    | coding    |
| MSTRG.43777.3  | ZNF619    | XLOC_051188 | 3851  | coding | coding    | coding    | noncoding |
| MSTRG.44061.6  | CTNNB1    | XLOC_051223 | 31882 | coding | coding    | coding    | noncoding |
| MSTRG.43931.2  | VIPR1-AS1 | XLOC_051239 | 1474  | coding | coding    | coding    | noncoding |
| MSTRG.44015.20 | SEC22C    | XLOC_051241 | 11259 | coding | coding    | coding    | noncoding |
| MSTRG.44015.23 | SEC22C    | XLOC_051241 | 2015  | coding | coding    | noncoding | noncoding |
| MSTRG.44015.26 | SEC22C    | XLOC_051241 | 8981  | coding | coding    | coding    | noncoding |
| MSTRG.44015.29 | SEC22C    | XLOC_051241 | 3085  | coding | coding    | noncoding | noncoding |
| MSTRG.44164.4  | SNRK      | XLOC_051273 | 19980 | coding | coding    | coding    | noncoding |
| MSTRG.44444.4  | CCR3      | XLOC_051404 | 1759  | coding | coding    | coding    | coding    |
| MSTRG.44576.15 | NBEAL2    | XLOC_051449 | 9414  | coding | coding    | coding    | coding    |
| MSTRG.44663.6  | ARIH2OS   | XLOC_051555 | 1403  | coding | coding    | coding    | noncoding |
| MSTRG.44699.2  | KLHDC8B   | XLOC_051573 | 1534  | coding | coding    | coding    | noncoding |
| NM_001313943.2 | RHOA      | XLOC_051584 | 1944  | coding | coding    | coding    | coding    |
| MSTRG.44760.5  | MST1      | XLOC_051598 | 7330  | coding | coding    | coding    | coding    |
| MSTRG.44793.9  | RBM6      | XLOC_051616 | 1387  | coding | coding    | noncoding | noncoding |
| MSTRG.44920.2  | RAD54L2   | XLOC_051716 | 586   | coding | noncoding | noncoding | noncoding |
| MSTRG.44926.3  | TEX264    | XLOC_051719 | 1438  | coding | noncoding | coding    | coding    |
| MSTRG.45151.3  | PRKCD     | XLOC_051817 | 2957  | coding | coding    | coding    | noncoding |
| MSTRG.45441.3  | ASB14     | XLOC_051992 | 2412  | coding | coding    | coding    | noncoding |
| MSTRG.45511.3  | SLMAP     | XLOC_052012 | 1803  | coding | noncoding | coding    | noncoding |
| XM_017006974.1 | PROK2     | XLOC_052555 | 1547  | coding | coding    | noncoding | noncoding |
| MSTRG.46974.2  | CHMP2B    | XLOC_052938 | 311   | coding | noncoding | coding    | noncoding |
| NM_003663.3    | CGGBP1    | XLOC_052961 | 4437  | coding | noncoding | coding    | coding    |
| MSTRG.47460.7  | DHFR2     | XLOC_053046 | 4410  | coding | coding    | noncoding | noncoding |
| MSTRG.47460.10 | NSUN3     | XLOC_053046 | 4304  | coding | coding    | noncoding | coding    |
| MSTRG.47744.3  | DCBLD2    | XLOC_053155 | 1380  | coding | coding    | noncoding | noncoding |
| MSTRG.47789.4  | TBC1D23   | XLOC_053190 | 1872  | coding | coding    | noncoding | noncoding |
| MSTRG.47836.3  | ABI3BP    | XLOC_053216 | 8810  | coding | coding    | coding    | coding    |
| MSTRG.48067.3  | PCNP      | XLOC_053256 | 2629  | coding | coding    | noncoding | noncoding |
| MSTRG.47948.1  | NXPE3     | XLOC_053266 | 3617  | coding | coding    | coding    | noncoding |
| MSTRG.47948.6  | NXPE3     | XLOC_053266 | 3013  | coding | coding    | noncoding | noncoding |
| MSTRG.47948.8  | NXPE3     | XLOC_053266 | 1290  | coding | noncoding | noncoding | noncoding |
| XM_011513257.1 | CBLB      | XLOC_053373 | 6600  | coding | coding    | coding    | coding    |
| MSTRG.48684.7  | CD96      | XLOC_053643 | 4608  | coding | noncoding | noncoding | noncoding |
| NM_181780.4    | BTLA      | XLOC_053698 | 3126  | coding | coding    | noncoding | coding    |
| MSTRG.48818.6  | SLC35A5   | XLOC_053718 | 620   | coding | coding    | noncoding | noncoding |
| MSTRG.49992.4  | TIGIT     | XLOC_053826 | 1985  | coding | coding    | noncoding | noncoding |
| XR_001740197.2 | TMEM39A   | XLOC_054126 | 4500  | coding | coding    | coding    | coding    |
| MSTRG.49578.20 | PARP9     | XLOC_054325 | 4809  | coding | coding    | noncoding | noncoding |
| MSTRG.49581.5  | PARP15    | XLOC_054326 | 1683  | coding | coding    | coding    | noncoding |
| XR_001740267.2 | HSPBAP1   | XLOC_054333 | 2034  | coding | coding    | coding    | coding    |

|                |              |             |       |        |           |           |           |
|----------------|--------------|-------------|-------|--------|-----------|-----------|-----------|
| MSTRG.49699.1  | MYLK-AS1     | XLOC_054380 | 480   | coding | noncoding | noncoding | noncoding |
| NM_053032.4    | MYLK         | XLOC_054382 | 4775  | coding | coding    | coding    | coding    |
| MSTRG.49821.1  | ZNF148       | XLOC_054449 | 294   | coding | noncoding | noncoding | noncoding |
| MSTRG.50377.1  |              | XLOC_054713 | 326   | coding | noncoding | noncoding | noncoding |
| NR_034179.1    | LOC653712    | XLOC_054722 | 1104  | coding | noncoding | coding    | coding    |
| NM_001199469.2 | ISY1         | XLOC_054734 | 3678  | coding | coding    | coding    | coding    |
| MSTRG.50514.2  | COPG1        | XLOC_054750 | 3211  | coding | coding    | coding    | noncoding |
| MSTRG.50770.2  | DNAJC13      | XLOC_054933 | 2965  | coding | noncoding | noncoding | noncoding |
| MSTRG.51661.62 | CEP63        | XLOC_055016 | 18179 | coding | noncoding | coding    | noncoding |
| MSTRG.51661.67 | EPHB1        | XLOC_055016 | 3184  | coding | noncoding | coding    | noncoding |
| XR_001740924.2 | LOC105374121 | XLOC_055019 | 21856 | coding | noncoding | noncoding | coding    |
| MSTRG.51036.1  | PPP2R3A      | XLOC_055039 | 279   | coding | noncoding | noncoding | noncoding |
| XR_001740929.1 | IL20RB-AS1   | XLOC_055084 | 768   | coding | coding    | noncoding | noncoding |
| MSTRG.51353.2  | SLC25A36     | XLOC_055256 | 1068  | coding | coding    | noncoding | noncoding |
| MSTRG.52762.21 | MBNL1-AS1    | XLOC_055746 | 12871 | coding | noncoding | coding    | noncoding |
| MSTRG.52762.23 | MBNL1        | XLOC_055746 | 51800 | coding | coding    | noncoding | noncoding |
| XM_017006892.2 | CCNL1        | XLOC_055931 | 3861  | coding | coding    | coding    | coding    |
| MSTRG.52898.2  | VEPH1        | XLOC_055935 | 637   | coding | noncoding | noncoding | noncoding |
| MSTRG.52916.2  | LOC100996447 | XLOC_055949 | 2820  | coding | noncoding | noncoding | noncoding |
| MSTRG.52953.2  | GFM1         | XLOC_055956 | 2626  | coding | coding    | noncoding | noncoding |
| MSTRG.52976.1  | LOC100287290 | XLOC_055967 | 390   | coding | noncoding | noncoding | noncoding |
| MSTRG.53020.1  |              | XLOC_055990 | 281   | coding | coding    | noncoding | noncoding |
| MSTRG.53671.2  | SKIL         | XLOC_056329 | 4206  | coding | coding    | coding    | coding    |
| MSTRG.53922.12 | FNDC3B       | XLOC_056415 | 3169  | coding | coding    | coding    | noncoding |
| MSTRG.53787.1  | LINC02068    | XLOC_056438 | 213   | coding | noncoding | noncoding | noncoding |
| MSTRG.53880.3  | ECT2         | XLOC_056450 | 2914  | coding | coding    | noncoding | noncoding |
| MSTRG.54256.7  | KCNMB3       | XLOC_056642 | 7499  | coding | coding    | coding    | coding    |
| MSTRG.54294.2  | MRPL47       | XLOC_056654 | 2781  | coding | coding    | noncoding | coding    |
| MSTRG.54373.7  | FXR1         | XLOC_056698 | 2026  | coding | coding    | noncoding | noncoding |
| MSTRG.54373.9  | FXR1         | XLOC_056698 | 1734  | coding | coding    | noncoding | noncoding |
| MSTRG.54569.8  | MCF2L2       | XLOC_056791 | 6323  | coding | coding    | coding    | noncoding |
| MSTRG.54875.5  | VPS8         | XLOC_056855 | 3343  | coding | coding    | noncoding | noncoding |
| MSTRG.54770.2  | SENP2        | XLOC_056894 | 2861  | coding | coding    | noncoding | noncoding |
| MSTRG.54770.3  | SENP2        | XLOC_056894 | 2865  | coding | coding    | noncoding | noncoding |
| MSTRG.54940.2  | RFC4         | XLOC_056953 | 4621  | coding | coding    | coding    | noncoding |
| MSTRG.54954.3  | ST6GAL1      | XLOC_056958 | 4318  | coding | coding    | coding    | noncoding |
| MSTRG.54998.1  |              | XLOC_056975 | 4745  | coding | noncoding | noncoding | noncoding |
| MSTRG.55261.5  | IL1RAP       | XLOC_057139 | 1325  | coding | coding    | noncoding | noncoding |
| MSTRG.55506.4  | OPA1-AS1     | XLOC_057227 | 4181  | coding | coding    | coding    | noncoding |
| MSTRG.55506.7  | OPA1         | XLOC_057227 | 4341  | coding | coding    | noncoding | noncoding |
| MSTRG.56080.2  | RPL35A       | XLOC_057481 | 570   | coding | coding    | noncoding | noncoding |
| MSTRG.56042.1  | LOC107986177 | XLOC_057488 | 2391  | coding | noncoding | coding    | noncoding |

|                  |              |             |       |        |           |           |           |
|------------------|--------------|-------------|-------|--------|-----------|-----------|-----------|
| MSTRG. 56042. 17 | FAM157A      | XLOC_057488 | 4652  | coding | noncoding | coding    | coding    |
| MSTRG. 56042. 18 | FAM157A      | XLOC_057488 | 1006  | coding | noncoding | coding    | noncoding |
| NM_014392. 4     | NSG1         | XLOC_057788 | 2418  | coding | coding    | coding    | coding    |
| NM_152293. 3     | TADA2B       | XLOC_057937 | 4369  | coding | coding    | coding    | coding    |
| NM_000798. 5     | DRD5         | XLOC_058103 | 2376  | coding | coding    | coding    | coding    |
| MSTRG. 57237. 1  |              | XLOC_058133 | 241   | coding | noncoding | noncoding | noncoding |
| MSTRG. 58530. 1  | LOC101929095 | XLOC_058398 | 415   | coding | noncoding | noncoding | noncoding |
| MSTRG. 58559. 1  | LOC101929095 | XLOC_058424 | 250   | coding | coding    | noncoding | noncoding |
| MSTRG. 58560. 1  | LOC101929095 | XLOC_058425 | 267   | coding | noncoding | noncoding | noncoding |
| MSTRG. 58563. 1  | LOC101929095 | XLOC_058428 | 2375  | coding | noncoding | noncoding | noncoding |
| MSTRG. 58567. 2  | LOC101929095 | XLOC_058431 | 6957  | coding | coding    | noncoding | noncoding |
| XM_011513772. 1  | C1QTNF7      | XLOC_058433 | 4390  | coding | coding    | coding    | coding    |
| MSTRG. 58584. 19 | CC2D2A       | XLOC_058437 | 4108  | coding | noncoding | noncoding | noncoding |
| MSTRG. 58584. 27 | FAM200B      | XLOC_058437 | 16236 | coding | coding    | coding    | coding    |
| XM_024453999. 1  | FAM200B      | XLOC_058437 | 3865  | coding | noncoding | noncoding | coding    |
| MSTRG. 58106. 1  | ADGRA3       | XLOC_058672 | 320   | coding | coding    | noncoding | noncoding |
| XR_002959726. 1  | ANAPC4       | XLOC_058805 | 2662  | coding | coding    | coding    | coding    |
| MSTRG. 59150. 1  | ARAP2        | XLOC_059120 | 471   | coding | noncoding | noncoding | noncoding |
| MSTRG. 59153. 2  | LOC439933    | XLOC_059123 | 10480 | coding | coding    | coding    | noncoding |
| MSTRG. 59297. 2  | TLR1         | XLOC_059290 | 11130 | coding | coding    | noncoding | noncoding |
| MSTRG. 59297. 6  | TLR1         | XLOC_059290 | 9648  | coding | coding    | noncoding | coding    |
| MSTRG. 59297. 9  | TLR6         | XLOC_059290 | 11685 | coding | coding    | noncoding | noncoding |
| MSTRG. 59297. 13 | TLR1         | XLOC_059290 | 14205 | coding | coding    | noncoding | noncoding |
| MSTRG. 59297. 11 | TLR1         | XLOC_059290 | 14529 | coding | coding    | noncoding | noncoding |
| MSTRG. 59297. 29 | TLR1         | XLOC_059290 | 12662 | coding | coding    | noncoding | noncoding |
| MSTRG. 59297. 34 | TLR1         | XLOC_059290 | 14867 | coding | coding    | noncoding | noncoding |
| MSTRG. 59297. 35 | TLR1         | XLOC_059290 | 12587 | coding | coding    | coding    | noncoding |
| MSTRG. 59415. 18 | RFC1         | XLOC_059311 | 3522  | coding | coding    | noncoding | coding    |
| XM_011513719. 2  | N4BP2        | XLOC_059344 | 9496  | coding | coding    | coding    | coding    |
| NM_001278365. 2  | RHOH         | XLOC_059351 | 4276  | coding | coding    | coding    | coding    |
| MSTRG. 59805. 4  | ATP8A1       | XLOC_059457 | 9177  | coding | coding    | coding    | noncoding |
| MSTRG. 59805. 5  | ATP8A1       | XLOC_059457 | 5675  | coding | coding    | coding    | noncoding |
| MSTRG. 59950. 1  |              | XLOC_059570 | 1276  | coding | noncoding | noncoding | noncoding |
| MSTRG. 59996. 6  | TXK          | XLOC_059617 | 3188  | coding | coding    | noncoding | noncoding |
| MSTRG. 59996. 12 | TEC          | XLOC_059617 | 877   | coding | coding    | noncoding | noncoding |
| XM_017008412. 1  | TMEM165      | XLOC_059838 | 1893  | coding | coding    | coding    | coding    |
| XM_011534397. 3  | KIAA1211     | XLOC_059875 | 7660  | coding | coding    | coding    | coding    |
| MSTRG. 61193. 10 | YTHDC1       | XLOC_060148 | 3823  | coding | coding    | coding    | noncoding |
| XM_017008303. 1  | UGT2B28      | XLOC_060175 | 1321  | coding | coding    | coding    | coding    |
| MSTRG. 61260. 2  | SULT1B1      | XLOC_060191 | 10920 | coding | coding    | coding    | coding    |
| MSTRG. 61260. 3  | SULT1B1      | XLOC_060191 | 8148  | coding | coding    | coding    | coding    |
| MSTRG. 61328. 1  | RUFY3        | XLOC_060238 | 293   | coding | noncoding | noncoding | noncoding |

|                |          |             |       |        |           |           |           |
|----------------|----------|-------------|-------|--------|-----------|-----------|-----------|
| XM_011532412.2 | MOB1B    | XLOC_060242 | 6966  | coding | coding    | coding    | coding    |
| NM_002993.4    | CXCL6    | XLOC_060343 | 1537  | coding | coding    | coding    | coding    |
| MSTRG.61739.12 | NAAA     | XLOC_060452 | 1680  | coding | coding    | coding    | noncoding |
| MSTRG.62013.7  | CNOT6L   | XLOC_060552 | 10824 | coding | noncoding | noncoding | noncoding |
| MSTRG.62013.16 | CNOT6L   | XLOC_060552 | 1858  | coding | coding    | noncoding | noncoding |
| MSTRG.62013.17 | CNOT6L   | XLOC_060552 | 1514  | coding | coding    | noncoding | noncoding |
| MSTRG.62391.11 | SEC31A   | XLOC_060761 | 1774  | coding | noncoding | noncoding | noncoding |
| MSTRG.62424.7  | PLAC8    | XLOC_060771 | 4822  | coding | coding    | coding    | coding    |
| MSTRG.62492.3  | COQ2     | XLOC_060810 | 1179  | coding | coding    | noncoding | noncoding |
| MSTRG.62537.4  | HELQ     | XLOC_060816 | 1667  | coding | coding    | noncoding | noncoding |
| MSTRG.62538.5  | MRPS18C  | XLOC_060817 | 2236  | coding | coding    | noncoding | noncoding |
| MSTRG.62538.7  | MRPS18C  | XLOC_060817 | 1648  | coding | noncoding | noncoding | noncoding |
| MSTRG.62592.16 | WDFY3    | XLOC_060848 | 4364  | coding | noncoding | coding    | coding    |
| MSTRG.62592.20 | WDFY3    | XLOC_060848 | 2035  | coding | noncoding | noncoding | noncoding |
| MSTRG.63032.9  | FAM13A   | XLOC_061044 | 602   | coding | coding    | noncoding | noncoding |
| NM_001128430.2 | SMARCAD1 | XLOC_061176 | 5022  | coding | coding    | coding    | coding    |
| XM_024453949.1 | METAP1   | XLOC_061312 | 3036  | coding | coding    | coding    | coding    |
| MSTRG.63755.7  | PPP3CA   | XLOC_061395 | 9245  | coding | noncoding | noncoding | noncoding |
| MSTRG.63755.12 | PPP3CA   | XLOC_061395 | 5697  | coding | noncoding | noncoding | noncoding |
| MSTRG.63755.14 | PPP3CA   | XLOC_061395 | 35937 | coding | noncoding | coding    | noncoding |
| NM_001127208.2 | TET2     | XLOC_061583 | 9780  | coding | coding    | coding    | coding    |
| XM_006714242.3 | TET2     | XLOC_061583 | 9324  | coding | coding    | coding    | coding    |
| MSTRG.64364.7  | AIMP1    | XLOC_061621 | 5177  | coding | coding    | coding    | noncoding |
| MSTRG.64491.9  | LEF1-AS1 | XLOC_061677 | 10659 | coding | coding    | coding    | coding    |
| MSTRG.64821.1  | ZGRF1    | XLOC_061924 | 233   | coding | coding    | noncoding | noncoding |
| MSTRG.65059.6  | CAMK2D   | XLOC_061945 | 211   | coding | noncoding | noncoding | noncoding |
| NM_016599.4    | MYOZ2    | XLOC_062115 | 2597  | coding | coding    | coding    | coding    |
| MSTRG.65452.1  |          | XLOC_062197 | 355   | coding | noncoding | noncoding | noncoding |
| MSTRG.65483.1  | PRDM5    | XLOC_062222 | 1205  | coding | coding    | noncoding | noncoding |
| MSTRG.65483.2  | PRDM5    | XLOC_062222 | 1348  | coding | coding    | noncoding | noncoding |
| MSTRG.65395.2  | ANXA5    | XLOC_062266 | 1569  | coding | coding    | coding    | noncoding |
| XM_011532327.1 | KIAA1109 | XLOC_062297 | 16206 | coding | coding    | coding    | coding    |
| MSTRG.66398.42 | SCLT1    | XLOC_062542 | 1086  | coding | noncoding | noncoding | noncoding |
| XM_005263236.3 | NAA15    | XLOC_062765 | 5429  | coding | coding    | coding    | coding    |
| NM_172175.3    | IL15     | XLOC_062874 | 2336  | coding | coding    | noncoding | coding    |
| MSTRG.66767.14 | GYPB     | XLOC_062956 | 1110  | coding | coding    | noncoding | noncoding |
| MSTRG.66767.23 | GYPA     | XLOC_062956 | 804   | coding | coding    | noncoding | noncoding |
| MSTRG.66767.28 | GYPB     | XLOC_062956 | 629   | coding | coding    | noncoding | noncoding |
| MSTRG.66813.1  |          | XLOC_062979 | 250   | coding | noncoding | noncoding | noncoding |
| MSTRG.66806.4  | OTUD4    | XLOC_062996 | 4468  | coding | coding    | coding    | noncoding |
| XR_002959746.1 | C4orf51  | XLOC_063013 | 1590  | coding | coding    | noncoding | coding    |
| MSTRG.67009.6  | SLC10A7  | XLOC_063034 | 669   | coding | coding    | noncoding | noncoding |

|                  |              |             |       |        |           |           |           |
|------------------|--------------|-------------|-------|--------|-----------|-----------|-----------|
| MSTRG. 67228. 6  | LRBA         | XLOC_063137 | 7964  | coding | coding    | coding    | coding    |
| MSTRG. 67228. 9  | LRBA         | XLOC_063137 | 7859  | coding | coding    | coding    | coding    |
| MSTRG. 67331. 2  | FBXW7-AS1    | XLOC_063195 | 11324 | coding | coding    | coding    | noncoding |
| MSTRG. 68249. 1  | KLHL2        | XLOC_063619 | 291   | coding | noncoding | noncoding | noncoding |
| MSTRG. 68409. 1  |              | XLOC_063701 | 2333  | coding | noncoding | noncoding | noncoding |
| MSTRG. 68433. 1  |              | XLOC_063712 | 866   | coding | noncoding | noncoding | noncoding |
| MSTRG. 68436. 7  | DDX60L       | XLOC_063715 | 6879  | coding | coding    | noncoding | noncoding |
| MSTRG. 68436. 8  | DDX60L       | XLOC_063715 | 7189  | coding | coding    | noncoding | noncoding |
| MSTRG. 68337. 27 | CBR4         | XLOC_063716 | 2358  | coding | coding    | noncoding | noncoding |
| MSTRG. 68520. 4  | MFAP3L       | XLOC_063765 | 4156  | coding | coding    | coding    | noncoding |
| MSTRG. 68520. 7  | MFAP3L       | XLOC_063765 | 4817  | coding | coding    | coding    | noncoding |
| MSTRG. 68657. 1  | GALNT7       | XLOC_063847 | 582   | coding | noncoding | noncoding | noncoding |
| MSTRG. 68665. 2  | HMGB2        | XLOC_063853 | 1197  | coding | coding    | coding    | coding    |
| MSTRG. 69192. 3  | DCTD         | XLOC_064083 | 2018  | coding | coding    | noncoding | coding    |
| MSTRG. 69192. 4  | DCTD         | XLOC_064083 | 2097  | coding | coding    | noncoding | coding    |
| MSTRG. 69324. 1  | RWDD4        | XLOC_064132 | 250   | coding | noncoding | noncoding | noncoding |
| MSTRG. 69364. 11 | IRF2         | XLOC_064167 | 13953 | coding | noncoding | coding    | noncoding |
| MSTRG. 69669. 1  | LOC339975    | XLOC_064282 | 363   | coding | noncoding | noncoding | noncoding |
| XR_427651. 4     | LINC02515    | XLOC_064293 | 1743  | coding | noncoding | noncoding | noncoding |
| MSTRG. 56166. 4  | PIGG         | XLOC_064413 | 2333  | coding | coding    | coding    | coding    |
| MSTRG. 56166. 7  | PIGG         | XLOC_064413 | 2826  | coding | coding    | coding    | coding    |
| MSTRG. 56194. 2  | LOC107986211 | XLOC_064428 | 4929  | coding | coding    | coding    | noncoding |
| XM_017007764. 1  | CTBP1        | XLOC_064478 | 8510  | coding | coding    | coding    | coding    |
| XM_005248038. 4  | TMEM129      | XLOC_064509 | 2709  | coding | coding    | coding    | coding    |
| MSTRG. 56388. 1  | NELFA        | XLOC_064528 | 317   | coding | noncoding | noncoding | noncoding |
| MSTRG. 56445. 7  | FAM193A      | XLOC_064552 | 999   | coding | noncoding | noncoding | coding    |
| MSTRG. 56474. 3  | SH3BP2       | XLOC_064563 | 3676  | coding | coding    | coding    | coding    |
| MSTRG. 56561. 2  | HTT          | XLOC_064577 | 10800 | coding | coding    | coding    | coding    |
| NM_016930. 4     | STX18        | XLOC_064638 | 2158  | coding | coding    | coding    | coding    |
| MSTRG. 56827. 1  | STX18-AS1    | XLOC_064663 | 361   | coding | noncoding | noncoding | noncoding |
| MSTRG. 57183. 1  |              | XLOC_064912 | 300   | coding | noncoding | noncoding | noncoding |
| MSTRG. 57184. 1  |              | XLOC_064913 | 814   | coding | noncoding | noncoding | noncoding |
| XM_011513832. 2  | FBXL5        | XLOC_065241 | 2847  | coding | coding    | coding    | coding    |
| MSTRG. 58614. 5  | BST1         | XLOC_065242 | 7270  | coding | coding    | coding    | noncoding |
| MSTRG. 57882. 3  | FAM184B      | XLOC_065324 | 1983  | coding | coding    | coding    | noncoding |
| MSTRG. 58050. 1  | LCORL        | XLOC_065354 | 245   | coding | noncoding | noncoding | noncoding |
| XM_011513819. 2  | SEL1L3       | XLOC_065595 | 5991  | coding | coding    | coding    | coding    |
| MSTRG. 58479. 2  | RBPJ         | XLOC_065622 | 16078 | coding | coding    | coding    | noncoding |
| MSTRG. 59012. 7  | STIM2        | XLOC_065653 | 6123  | coding | coding    | coding    | coding    |
| MSTRG. 59012. 10 | STIM2        | XLOC_065653 | 6431  | coding | coding    | coding    | coding    |
| MSTRG. 59107. 4  | DTHD1        | XLOC_065848 | 3586  | coding | coding    | noncoding | noncoding |
| NM_001085400. 2  | RELL1        | XLOC_065887 | 3617  | coding | coding    | coding    | coding    |

|                  |              |             |       |        |           |           |           |
|------------------|--------------|-------------|-------|--------|-----------|-----------|-----------|
| MSTRG. 59342. 4  | TBC1D1       | XLOC_065914 | 11057 | coding | coding    | coding    | coding    |
| MSTRG. 59342. 6  | TBC1D1       | XLOC_065914 | 5237  | coding | coding    | coding    | coding    |
| MSTRG. 59264. 8  | KLF3-AS1     | XLOC_065934 | 10940 | coding | coding    | coding    | noncoding |
| XM_024454198. 1  | TLR1         | XLOC_065945 | 7209  | coding | coding    | coding    | coding    |
| MSTRG. 59484. 6  | LOC344967    | XLOC_066003 | 3048  | coding | coding    | coding    | noncoding |
| MSTRG. 59614. 1  | LIMCH1       | XLOC_066070 | 209   | coding | noncoding | noncoding | noncoding |
| MSTRG. 59636. 1  | LOC105374426 | XLOC_066096 | 10296 | coding | coding    | coding    | noncoding |
| MSTRG. 59671. 1  | BEND4        | XLOC_066112 | 303   | coding | noncoding | noncoding | noncoding |
| MSTRG. 59823. 1  | ATP8A1       | XLOC_066136 | 248   | coding | coding    | noncoding | noncoding |
| MSTRG. 60032. 3  | ATP10D       | XLOC_066261 | 4209  | coding | coding    | coding    | coding    |
| MSTRG. 59979. 4  | SLAIN2       | XLOC_066327 | 4125  | coding | coding    | noncoding | noncoding |
| MSTRG. 60548. 8  | FIP1L1       | XLOC_066490 | 1754  | coding | coding    | coding    | noncoding |
| NM_182606. 4     | TMPRSS11A    | XLOC_066921 | 3313  | coding | coding    | coding    | coding    |
| MSTRG. 61213. 2  | UGT2B11      | XLOC_066953 | 1416  | coding | coding    | coding    | coding    |
| MSTRG. 61418. 1  | SLC4A4       | XLOC_067028 | 451   | coding | noncoding | noncoding | noncoding |
| MSTRG. 61560. 1  | MTHFD2L      | XLOC_067147 | 269   | coding | noncoding | noncoding | noncoding |
| MSTRG. 61525. 1  |              | XLOC_067174 | 252   | coding | coding    | noncoding | noncoding |
| XR_001741407. 1  | LOC105377286 | XLOC_067240 | 4585  | coding | noncoding | noncoding | noncoding |
| NR_146464. 1     | PAQR3        | XLOC_067409 | 3894  | coding | coding    | coding    | coding    |
| NM_031370. 3     | HNRNPD       | XLOC_067546 | 3068  | coding | coding    | coding    | coding    |
| MSTRG. 62404. 1  | THAP9        | XLOC_067579 | 397   | coding | coding    | noncoding | noncoding |
| MSTRG. 62505. 3  | GPAT3        | XLOC_067627 | 2628  | coding | coding    | noncoding | noncoding |
| MSTRG. 62836. 13 | AFF1         | XLOC_067761 | 7293  | coding | coding    | coding    | coding    |
| MSTRG. 62836. 21 | AFF1         | XLOC_067761 | 7673  | coding | coding    | noncoding | noncoding |
| MSTRG. 62871. 1  |              | XLOC_067766 | 288   | coding | noncoding | noncoding | noncoding |
| MSTRG. 63016. 17 | FAM13A-AS1   | XLOC_067832 | 4346  | coding | coding    | noncoding | noncoding |
| MSTRG. 63195. 1  | CCSER1       | XLOC_067882 | 252   | coding | coding    | noncoding | noncoding |
| MSTRG. 63209. 1  | CCSER1       | XLOC_067895 | 324   | coding | noncoding | noncoding | noncoding |
| MSTRG. 63273. 1  | CCSER1       | XLOC_067940 | 285   | coding | coding    | noncoding | noncoding |
| MSTRG. 63501. 9  | RAP1GDS1     | XLOC_068117 | 631   | coding | coding    | noncoding | noncoding |
| MSTRG. 63536. 1  | LOC100507053 | XLOC_068153 | 274   | coding | noncoding | noncoding | noncoding |
| NM_001278310. 2  | DNAJB14      | XLOC_068199 | 5795  | coding | coding    | coding    | coding    |
| XM_024454127. 1  | PPP3CA       | XLOC_068245 | 4005  | coding | coding    | coding    | coding    |
| XM_024454048. 1  | MANBA        | XLOC_068396 | 3162  | coding | coding    | coding    | coding    |
| MSTRG. 63987. 1  | MANBA        | XLOC_068415 | 316   | coding | noncoding | noncoding | noncoding |
| NM_181886. 3     | UBE2D3       | XLOC_068428 | 4169  | coding | coding    | noncoding | noncoding |
| NR_047515. 1     | SLC9B1       | XLOC_068432 | 1489  | coding | coding    | noncoding | coding    |
| MSTRG. 64265. 4  | TET2-AS1     | XLOC_068518 | 43691 | coding | coding    | coding    | noncoding |
| MSTRG. 64265. 7  | TET2         | XLOC_068518 | 8132  | coding | noncoding | coding    | noncoding |
| MSTRG. 64265. 12 | TET2         | XLOC_068518 | 14908 | coding | coding    | coding    | coding    |
| MSTRG. 64265. 19 | TET2         | XLOC_068518 | 13204 | coding | coding    | coding    | noncoding |
| MSTRG. 64265. 21 | TET2         | XLOC_068518 | 14400 | coding | coding    | noncoding | noncoding |

|                  |          |             |       |        |           |           |           |
|------------------|----------|-------------|-------|--------|-----------|-----------|-----------|
| MSTRG. 64265. 26 | TET2-AS1 | XLOC_068518 | 9216  | coding | noncoding | noncoding | noncoding |
| MSTRG. 64407. 5  | RPL34    | XLOC_068704 | 682   | coding | coding    | noncoding | noncoding |
| MSTRG. 64407. 6  | RPL34    | XLOC_068704 | 1138  | coding | coding    | noncoding | noncoding |
| MSTRG. 64548. 5  | SEC24B   | XLOC_068744 | 4254  | coding | coding    | coding    | noncoding |
| MSTRG. 64548. 12 | SEC24B   | XLOC_068744 | 1678  | coding | coding    | noncoding | noncoding |
| MSTRG. 64623. 3  | EGF      | XLOC_068778 | 357   | coding | coding    | noncoding | noncoding |
| MSTRG. 64773. 6  | ALPK1    | XLOC_068853 | 7057  | coding | noncoding | coding    | coding    |
| MSTRG. 64773. 11 | ALPK1    | XLOC_068853 | 6489  | coding | noncoding | noncoding | noncoding |
| MSTRG. 65064. 1  | CAMK2D   | XLOC_068886 | 212   | coding | noncoding | noncoding | noncoding |
| NM_018699. 3     | PRDM5    | XLOC_069153 | 5349  | coding | coding    | coding    | coding    |
| MSTRG. 65636. 18 | KIAA1109 | XLOC_069191 | 12202 | coding | noncoding | coding    | noncoding |
| MSTRG. 65636. 23 | KIAA1109 | XLOC_069191 | 8725  | coding | noncoding | noncoding | noncoding |
| NM_152778. 3     | MFS8     | XLOC_069329 | 4597  | coding | coding    | noncoding | coding    |
| MSTRG. 66399. 2  | JADE1    | XLOC_069367 | 3793  | coding | coding    | coding    | noncoding |
| MSTRG. 66401. 4  | C4orf33  | XLOC_069369 | 1717  | coding | noncoding | noncoding | noncoding |
| NM_001276457. 1  | ELF2     | XLOC_069561 | 3005  | coding | coding    | coding    | coding    |
| MSTRG. 66603. 6  | GAB1     | XLOC_069832 | 6186  | coding | coding    | coding    | coding    |
| MSTRG. 66874. 1  |          | XLOC_069933 | 222   | coding | coding    | noncoding | noncoding |
| MSTRG. 67638. 3  | RNF175   | XLOC_070332 | 3807  | coding | noncoding | noncoding | noncoding |
| MSTRG. 67638. 17 | RNF175   | XLOC_070332 | 22819 | coding | coding    | coding    | coding    |
| MSTRG. 67638. 16 | RNF175   | XLOC_070332 | 23440 | coding | coding    | coding    | coding    |
| MSTRG. 68053. 7  | RAPGEF2  | XLOC_070462 | 3516  | coding | coding    | coding    | noncoding |
| MSTRG. 68112. 5  | 1-Mar    | XLOC_070549 | 6645  | coding | coding    | coding    | coding    |
| MSTRG. 68229. 7  | KLHL2    | XLOC_070592 | 11612 | coding | coding    | coding    | noncoding |
| XM_011532103. 3  | DDX60    | XLOC_070657 | 5964  | coding | coding    | coding    | coding    |
| MSTRG. 68462. 1  | DDX60L   | XLOC_070694 | 292   | coding | noncoding | noncoding | noncoding |
| MSTRG. 68786. 1  | CEP44    | XLOC_070918 | 3403  | coding | noncoding | noncoding | noncoding |
| MSTRG. 68869. 2  | SPCS3    | XLOC_070974 | 3983  | coding | coding    | coding    | noncoding |
| MSTRG. 69375. 1  |          | XLOC_071265 | 599   | coding | noncoding | noncoding | noncoding |
| NM_004346. 4     | CASP3    | XLOC_071280 | 2645  | coding | coding    | coding    | coding    |
| XM_017007888. 2  | ACSL1    | XLOC_071286 | 3801  | coding | coding    | coding    | coding    |
| MSTRG. 69384. 1  |          | XLOC_071298 | 287   | coding | coding    | noncoding | noncoding |
| NM_018409. 3     | LRP2BP   | XLOC_071316 | 5158  | coding | coding    | coding    | coding    |
| MSTRG. 69888. 2  | LPCAT1   | XLOC_071552 | 5931  | coding | coding    | coding    | noncoding |
| MSTRG. 69909. 3  | SDHAP3   | XLOC_071557 | 4929  | coding | coding    | coding    | noncoding |
| MSTRG. 69923. 2  | MRPL36   | XLOC_071564 | 501   | coding | coding    | noncoding | noncoding |
| MSTRG. 70265. 2  | FASTKD3  | XLOC_071763 | 5318  | coding | coding    | coding    | noncoding |
| MSTRG. 70378. 1  | CMBL     | XLOC_071862 | 1709  | coding | coding    | noncoding | noncoding |
| NM_138348. 6     | OTULIN   | XLOC_071993 | 7969  | coding | coding    | coding    | coding    |
| MSTRG. 70844. 1  | ZNF622   | XLOC_072053 | 1521  | coding | coding    | coding    | coding    |
| MSTRG. 71484. 2  | GOLPH3   | XLOC_072408 | 5714  | coding | coding    | coding    | noncoding |
| MSTRG. 71538. 1  | MTMR12   | XLOC_072413 | 5175  | coding | coding    | coding    | noncoding |

|                  |              |             |       |        |           |           |           |
|------------------|--------------|-------------|-------|--------|-----------|-----------|-----------|
| MSTRG. 71538. 7  | MTMR12       | XLOC_072413 | 207   | coding | noncoding | noncoding | noncoding |
| MSTRG. 71558. 2  | ZFR          | XLOC_072418 | 4063  | coding | coding    | coding    | coding    |
| MSTRG. 71804. 1  | C1QTNF3      | XLOC_072492 | 4092  | coding | coding    | noncoding | noncoding |
| MSTRG. 71809. 5  | C1QTNF3      | XLOC_072494 | 1802  | coding | coding    | noncoding | noncoding |
| MSTRG. 71913. 1  | LOC105374724 | XLOC_072614 | 319   | coding | noncoding | noncoding | noncoding |
| XM_005248282. 5  | NIPBL        | XLOC_072660 | 9016  | coding | coding    | coding    | coding    |
| MSTRG. 72079. 1  | CPLANE1      | XLOC_072664 | 221   | coding | noncoding | noncoding | noncoding |
| MSTRG. 72087. 1  | CPLANE1      | XLOC_072672 | 1730  | coding | coding    | noncoding | noncoding |
| MSTRG. 72181. 17 | FYB1         | XLOC_072736 | 5574  | coding | coding    | noncoding | coding    |
| MSTRG. 72387. 1  |              | XLOC_072855 | 372   | coding | noncoding | noncoding | noncoding |
| NM_001330707. 2  | ZNF131       | XLOC_072897 | 3286  | coding | coding    | coding    | coding    |
| MSTRG. 72488. 2  | C5orf34      | XLOC_072913 | 515   | coding | coding    | noncoding | noncoding |
| MSTRG. 72496. 2  | PAIP1        | XLOC_072916 | 2779  | coding | coding    | coding    | noncoding |
| MSTRG. 72751. 1  | EMB          | XLOC_073081 | 2454  | coding | noncoding | noncoding | noncoding |
| MSTRG. 72798. 1  |              | XLOC_073129 | 217   | coding | coding    | noncoding | noncoding |
| NM_001102575. 2  | SNX18        | XLOC_073270 | 5223  | coding | coding    | coding    | coding    |
| MSTRG. 73161. 6  | IL6ST        | XLOC_073324 | 6136  | coding | coding    | noncoding | noncoding |
| MSTRG. 73325. 16 | SETD9        | XLOC_073422 | 2180  | coding | coding    | noncoding | noncoding |
| MSTRG. 74805. 1  | PDE4D        | XLOC_073609 | 246   | coding | noncoding | noncoding | noncoding |
| MSTRG. 73508. 3  | ELOVL7       | XLOC_073683 | 2720  | coding | coding    | noncoding | noncoding |
| MSTRG. 73600. 1  |              | XLOC_073717 | 446   | coding | noncoding | noncoding | noncoding |
| NM_001098511. 2  | KIF2A        | XLOC_073812 | 4161  | coding | coding    | coding    | coding    |
| NM_001164442. 2  | SHISAL2B     | XLOC_073862 | 772   | coding | coding    | coding    | coding    |
| MSTRG. 73818. 1  | ADAMTS6      | XLOC_073921 | 279   | coding | noncoding | noncoding | noncoding |
| NM_001093755. 1  | TRAPPC13     | XLOC_073936 | 3103  | coding | coding    | coding    | coding    |
| MSTRG. 74892. 2  | ENC1         | XLOC_074306 | 291   | coding | noncoding | noncoding | noncoding |
| MSTRG. 74972. 4  | POLK         | XLOC_074338 | 8620  | coding | coding    | coding    | coding    |
| XR_002956163. 1  | POLK         | XLOC_074338 | 3730  | coding | coding    | coding    | coding    |
| MSTRG. 75138. 6  | AP3B1        | XLOC_074463 | 2559  | coding | coding    | coding    | coding    |
| MSTRG. 75255. 2  | LHFPL2       | XLOC_074485 | 3021  | coding | coding    | noncoding | noncoding |
| NM_001349549. 2  | TENT2        | XLOC_074535 | 5175  | coding | coding    | coding    | coding    |
| MSTRG. 75446. 5  | SSBP2        | XLOC_074677 | 12747 | coding | coding    | noncoding | noncoding |
| MSTRG. 75502. 3  | RPS23        | XLOC_074710 | 3070  | coding | coding    | coding    | noncoding |
| MSTRG. 75598. 1  |              | XLOC_074728 | 247   | coding | noncoding | noncoding | noncoding |
| MSTRG. 75869. 16 | RASA1        | XLOC_074816 | 49707 | coding | coding    | coding    | noncoding |
| MSTRG. 75869. 22 | RASA1        | XLOC_074816 | 16214 | coding | coding    | coding    | noncoding |
| MSTRG. 75869. 23 | RASA1        | XLOC_074816 | 10674 | coding | coding    | coding    | noncoding |
| MSTRG. 75888. 5  | TMEM161B     | XLOC_074845 | 3443  | coding | coding    | noncoding | noncoding |
| MSTRG. 75985. 3  | LYSMD3       | XLOC_074921 | 3169  | coding | coding    | noncoding | noncoding |
| MSTRG. 76257. 1  | LUCAT1       | XLOC_074925 | 1413  | coding | noncoding | noncoding | noncoding |
| MSTRG. 76257. 20 | LUCAT1       | XLOC_074925 | 4202  | coding | noncoding | noncoding | noncoding |
| MSTRG. 77957. 5  | FAM172A      | XLOC_074983 | 435   | coding | noncoding | noncoding | noncoding |

|                  |              |             |       |        |           |           |           |
|------------------|--------------|-------------|-------|--------|-----------|-----------|-----------|
| MSTRG. 77957. 8  | FAM172A      | XLOC_074983 | 2049  | coding | noncoding | noncoding | noncoding |
| MSTRG. 77957. 15 | FAM172A      | XLOC_074983 | 1539  | coding | noncoding | noncoding | noncoding |
| MSTRG. 77957. 38 | KIAA0825     | XLOC_074988 | 513   | coding | coding    | noncoding | coding    |
| MSTRG. 77957. 63 | MCTP1        | XLOC_074988 | 4145  | coding | coding    | noncoding | noncoding |
| MSTRG. 76618. 1  | LOC107986435 | XLOC_075163 | 287   | coding | noncoding | noncoding | noncoding |
| MSTRG. 76698. 9  | ST8SIA4      | XLOC_075218 | 29139 | coding | coding    | noncoding | noncoding |
| MSTRG. 76714. 1  |              | XLOC_075259 | 379   | coding | noncoding | noncoding | noncoding |
| MSTRG. 76727. 1  | LOC105379102 | XLOC_075268 | 564   | coding | coding    | noncoding | noncoding |
| MSTRG. 76952. 1  | NUDT12       | XLOC_075389 | 216   | coding | noncoding | noncoding | noncoding |
| MSTRG. 77279. 2  | PJA2         | XLOC_075573 | 19341 | coding | coding    | noncoding | noncoding |
| NM_016144. 4     | COMMD10      | XLOC_075919 | 1435  | coding | coding    | coding    | coding    |
| NM_014350. 4     | TNFAIP8      | XLOC_076082 | 6976  | coding | coding    | coding    | coding    |
| MSTRG. 78718. 2  | CEP120       | XLOC_076262 | 2803  | coding | coding    | coding    | noncoding |
| MSTRG. 78858. 1  | ZNF608       | XLOC_076322 | 203   | coding | noncoding | noncoding | noncoding |
| NM_001293735. 2  | LYRM7        | XLOC_076553 | 6137  | coding | coding    | noncoding | noncoding |
| MSTRG. 79387. 7  | RAPGEF6      | XLOC_076564 | 4458  | coding | coding    | coding    | noncoding |
| MSTRG. 79530. 30 | C5orf56      | XLOC_076602 | 5966  | coding | noncoding | coding    | coding    |
| MSTRG. 79530. 29 | C5orf56      | XLOC_076602 | 6635  | coding | noncoding | coding    | noncoding |
| MSTRG. 79457. 1  | KIF3A        | XLOC_076621 | 666   | coding | noncoding | noncoding | noncoding |
| XM_006714682. 2  | TCF7         | XLOC_076690 | 3401  | coding | coding    | coding    | coding    |
| MSTRG. 79668. 1  | CDKL3        | XLOC_076702 | 217   | coding | noncoding | noncoding | noncoding |
| MSTRG. 79920. 1  |              | XLOC_076838 | 220   | coding | noncoding | noncoding | noncoding |
| MSTRG. 79950. 1  | KLHL3        | XLOC_076855 | 242   | coding | coding    | noncoding | noncoding |
| XM_024446028. 1  | PKD2L2       | XLOC_076909 | 2730  | coding | coding    | coding    | coding    |
| MSTRG. 80015. 19 | PKD2L2       | XLOC_076909 | 5248  | coding | coding    | coding    | noncoding |
| MSTRG. 80028. 2  | BRD8         | XLOC_076912 | 3432  | coding | coding    | coding    | coding    |
| MSTRG. 80028. 3  | BRD8         | XLOC_076912 | 3558  | coding | coding    | coding    | coding    |
| MSTRG. 80028. 6  | BRD8         | XLOC_076912 | 1563  | coding | noncoding | coding    | coding    |
| NM_005733. 3     | KIF20A       | XLOC_076913 | 3095  | coding | coding    | coding    | coding    |
| MSTRG. 80245. 2  | PFDN1        | XLOC_077016 | 1222  | coding | noncoding | coding    | noncoding |
| MSTRG. 80303. 5  | LOC112267855 | XLOC_077046 | 387   | coding | noncoding | noncoding | noncoding |
| XM_017009617. 2  | TMCO6        | XLOC_077048 | 2107  | coding | noncoding | coding    | coding    |
| XM_024446124. 1  | TMCO6        | XLOC_077048 | 1895  | coding | noncoding | coding    | coding    |
| NM_032094. 2     | PCDHGA12     | XLOC_077098 | 2716  | coding | coding    | coding    | coding    |
| XR_944312. 2     | ARHGAP26     | XLOC_077149 | 3543  | coding | coding    | coding    | coding    |
| MSTRG. 80648. 3  | PRELID2      | XLOC_077406 | 740   | coding | coding    | coding    | noncoding |
| MSTRG. 80659. 2  | LARS         | XLOC_077420 | 3687  | coding | coding    | noncoding | noncoding |
| MSTRG. 81351. 7  | LOC105378230 | XLOC_077681 | 1755  | coding | noncoding | noncoding | noncoding |
| MSTRG. 81672. 2  | TIMD4        | XLOC_077865 | 398   | coding | noncoding | coding    | noncoding |
| NM_001099287. 1  | NIPAL4       | XLOC_077919 | 3279  | coding | coding    | coding    | coding    |
| MSTRG. 81944. 4  | PWWP2A       | XLOC_078015 | 2219  | coding | noncoding | coding    | noncoding |
| MSTRG. 82589. 22 | C5orf58      | XLOC_078369 | 16199 | coding | coding    | noncoding | noncoding |

|                |              |             |       |        |           |           |           |
|----------------|--------------|-------------|-------|--------|-----------|-----------|-----------|
| NM_001031711.3 | ERGIC1       | XLOC_078485 | 2903  | coding | coding    | coding    | coding    |
| MSTRG.83231.3  | LMAN2        | XLOC_078705 | 1641  | coding | coding    | coding    | noncoding |
| MSTRG.83329.3  | DOK3         | XLOC_078729 | 2472  | coding | coding    | coding    | coding    |
| MSTRG.83329.7  | DOK3         | XLOC_078729 | 3507  | coding | coding    | coding    | coding    |
| MSTRG.83336.5  | FAM193B      | XLOC_078731 | 1796  | coding | noncoding | coding    | noncoding |
| MSTRG.83393.5  | HNRNPAB      | XLOC_078767 | 3344  | coding | coding    | coding    | coding    |
| MSTRG.83433.4  | CLK4         | XLOC_078788 | 2445  | coding | coding    | noncoding | noncoding |
| MSTRG.83433.6  | CLK4         | XLOC_078788 | 2470  | coding | coding    | noncoding | noncoding |
| MSTRG.83444.2  | ZNF354A      | XLOC_078791 | 2449  | coding | coding    | noncoding | noncoding |
| MSTRG.83663.1  | RACK1        | XLOC_078909 | 1161  | coding | coding    | coding    | coding    |
| MSTRG.71087.1  |              | XLOC_079597 | 291   | coding | noncoding | noncoding | noncoding |
| MSTRG.71113.1  | GUSBP1       | XLOC_079620 | 639   | coding | noncoding | noncoding | noncoding |
| MSTRG.71115.1  | GUSBP1       | XLOC_079622 | 743   | coding | noncoding | noncoding | noncoding |
| MSTRG.71873.11 | IL7R         | XLOC_080001 | 10619 | coding | coding    | noncoding | noncoding |
| MSTRG.71931.3  | SKP2         | XLOC_080013 | 1625  | coding | coding    | noncoding | noncoding |
| MSTRG.72074.9  | CPLANE1      | XLOC_080046 | 8955  | coding | coding    | noncoding | noncoding |
| MSTRG.72041.2  | WDR70        | XLOC_080054 | 1064  | coding | coding    | noncoding | noncoding |
| XM_006714464.3 | FYB1         | XLOC_080104 | 4806  | coding | coding    | coding    | coding    |
| MSTRG.72218.2  | CARD6        | XLOC_080191 | 3474  | coding | noncoding | noncoding | noncoding |
| MSTRG.72312.3  | C5orf51      | XLOC_080223 | 5358  | coding | coding    | noncoding | noncoding |
| XM_005248333.5 | TMEM267      | XLOC_080307 | 3203  | coding | noncoding | coding    | coding    |
| MSTRG.73006.15 | PARP8        | XLOC_080409 | 18457 | coding | noncoding | noncoding | noncoding |
| MSTRG.72997.1  |              | XLOC_080498 | 388   | coding | noncoding | noncoding | noncoding |
| MSTRG.73326.1  | SETD9        | XLOC_080709 | 245   | coding | noncoding | noncoding | noncoding |
| MSTRG.73875.33 | PPWD1        | XLOC_080959 | 2670  | coding | coding    | noncoding | noncoding |
| MSTRG.73916.1  |              | XLOC_080981 | 280   | coding | coding    | noncoding | noncoding |
| XR_001742418.1 | LOC105379623 | XLOC_081131 | 1588  | coding | noncoding | coding    | noncoding |
| MSTRG.74408.2  | TNPO1        | XLOC_081221 | 8314  | coding | coding    | noncoding | noncoding |
| MSTRG.74420.1  | TNPO1        | XLOC_081223 | 798   | coding | noncoding | noncoding | noncoding |
| MSTRG.74458.9  | FCHO2        | XLOC_081230 | 1140  | coding | coding    | noncoding | noncoding |
| MSTRG.74458.12 | FCHO2        | XLOC_081230 | 2226  | coding | coding    | noncoding | noncoding |
| MSTRG.74973.9  | POLK         | XLOC_081339 | 2886  | coding | coding    | noncoding | noncoding |
| MSTRG.75165.1  | AP3B1        | XLOC_081471 | 409   | coding | noncoding | noncoding | noncoding |
| MSTRG.75415.5  | ZFYVE16      | XLOC_081595 | 6431  | coding | coding    | noncoding | noncoding |
| MSTRG.75415.7  | ZFYVE16      | XLOC_081595 | 7814  | coding | coding    | coding    | noncoding |
| MSTRG.75834.6  | ZCCHC9       | XLOC_081618 | 852   | coding | coding    | noncoding | noncoding |
| MSTRG.75651.6  | LOC107986431 | XLOC_081721 | 8774  | coding | coding    | coding    | coding    |
| MSTRG.75651.7  | VCAN-AS1     | XLOC_081721 | 23306 | coding | coding    | coding    | coding    |
| MSTRG.78039.1  | LOC105379087 | XLOC_082186 | 267   | coding | noncoding | noncoding | noncoding |
| MSTRG.78085.1  | SLF1         | XLOC_082224 | 1553  | coding | coding    | noncoding | noncoding |
| MSTRG.76888.3  | ERAP1        | XLOC_082343 | 10518 | coding | coding    | coding    | coding    |
| MSTRG.76888.39 | LNPEP        | XLOC_082343 | 7894  | coding | coding    | coding    | noncoding |

|                  |              |             |       |        |           |           |           |
|------------------|--------------|-------------|-------|--------|-----------|-----------|-----------|
| MSTRG. 76904. 2  | ERAP2        | XLOC_082345 | 3555  | coding | coding    | noncoding | noncoding |
| MSTRG. 76904. 5  | ERAP2        | XLOC_082345 | 5107  | coding | coding    | noncoding | noncoding |
| MSTRG. 77375. 2  | FER          | XLOC_082674 | 1631  | coding | coding    | coding    | noncoding |
| MSTRG. 77430. 1  | FER          | XLOC_082711 | 358   | coding | noncoding | noncoding | noncoding |
| MSTRG. 77289. 2  | MAN2A1       | XLOC_082752 | 7565  | coding | coding    | coding    | noncoding |
| MSTRG. 77593. 1  | CAMK4        | XLOC_082825 | 55716 | coding | coding    | coding    | noncoding |
| MSTRG. 77593. 4  | CAMK4        | XLOC_082825 | 31190 | coding | coding    | coding    | noncoding |
| MSTRG. 77547. 1  |              | XLOC_082855 | 208   | coding | coding    | noncoding | noncoding |
| MSTRG. 77751. 4  | YTHDC2       | XLOC_082901 | 997   | coding | coding    | coding    | noncoding |
| MSTRG. 78522. 1  |              | XLOC_083009 | 357   | coding | noncoding | noncoding | noncoding |
| MSTRG. 78247. 4  | DMXL1        | XLOC_083135 | 696   | coding | noncoding | noncoding | noncoding |
| MSTRG. 78269. 4  | TNFAIP8      | XLOC_083139 | 14302 | coding | coding    | coding    | coding    |
| MSTRG. 78269. 5  | TNFAIP8      | XLOC_083139 | 13672 | coding | coding    | coding    | coding    |
| MSTRG. 78741. 1  |              | XLOC_083307 | 265   | coding | noncoding | noncoding | noncoding |
| MSTRG. 79375. 9  | LOC105379173 | XLOC_083616 | 3448  | coding | noncoding | noncoding | noncoding |
| MSTRG. 79375. 14 | LOC105379173 | XLOC_083616 | 2493  | coding | noncoding | coding    | noncoding |
| NM_001164390. 2  | RAPGEF6      | XLOC_083619 | 3107  | coding | coding    | coding    | coding    |
| MSTRG. 79474. 1  | CCNI2        | XLOC_083721 | 396   | coding | noncoding | coding    | noncoding |
| MSTRG. 79814. 6  | SMAD5        | XLOC_083889 | 1508  | coding | coding    | noncoding | noncoding |
| MSTRG. 80128. 2  | CTNNA1       | XLOC_083995 | 2429  | coding | coding    | noncoding | coding    |
| MSTRG. 80176. 3  | UBE2D2       | XLOC_084035 | 2949  | coding | coding    | coding    | coding    |
| NM_006051. 3     | APBB3        | XLOC_084082 | 2158  | coding | coding    | coding    | coding    |
| NM_001174104. 1  | CD14         | XLOC_084092 | 1648  | coding | noncoding | coding    | coding    |
| MSTRG. 80320. 8  | HARS         | XLOC_084094 | 5288  | coding | coding    | coding    | coding    |
| MSTRG. 80415. 1  | PCDHGA8      | XLOC_084119 | 334   | coding | coding    | noncoding | noncoding |
| MSTRG. 80990. 10 | ARHGAP26     | XLOC_084195 | 8377  | coding | coding    | coding    | noncoding |
| MSTRG. 80990. 21 | ARHGAP26     | XLOC_084195 | 16713 | coding | noncoding | coding    | noncoding |
| NM_001204258. 2  | NR3C1        | XLOC_084212 | 6778  | coding | coding    | coding    | coding    |
| MSTRG. 80692. 3  | TCERG1       | XLOC_084303 | 1243  | coding | coding    | coding    | noncoding |
| MSTRG. 80933. 5  | ADRB2        | XLOC_084403 | 2624  | coding | coding    | coding    | noncoding |
| NR_132366. 1     | GRPEL2-AS1   | XLOC_084425 | 401   | coding | noncoding | noncoding | noncoding |
| NM_001892. 6     | CSNK1A1      | XLOC_084432 | 5360  | coding | coding    | coding    | coding    |
| NM_001025158. 2  | CD74         | XLOC_084508 | 1305  | coding | coding    | coding    | coding    |
| NM_001155. 5     | ANXA6        | XLOC_084555 | 2889  | coding | coding    | coding    | coding    |
| MSTRG. 81354. 3  | GM2A         | XLOC_084562 | 6216  | coding | coding    | noncoding | noncoding |
| MSTRG. 81547. 14 | FAM114A2     | XLOC_084667 | 5112  | coding | coding    | noncoding | noncoding |
| MSTRG. 81638. 8  | GALNT10      | XLOC_084674 | 3813  | coding | coding    | coding    | coding    |
| MSTRG. 81638. 10 | GALNT10      | XLOC_084674 | 5253  | coding | coding    | coding    | coding    |
| MSTRG. 81638. 11 | SAP30L-AS1   | XLOC_084674 | 3129  | coding | coding    | coding    | noncoding |
| MSTRG. 81565. 8  | CNOT8        | XLOC_084703 | 2760  | coding | coding    | noncoding | noncoding |
| MSTRG. 81565. 9  | CNOT8        | XLOC_084703 | 2802  | coding | coding    | noncoding | noncoding |
| MSTRG. 82230. 1  |              | XLOC_085092 | 258   | coding | coding    | noncoding | noncoding |

|                  |              |             |       |        |           |           |           |
|------------------|--------------|-------------|-------|--------|-----------|-----------|-----------|
| MSTRG. 82766. 11 | DOCK2        | XLOC_085186 | 3464  | coding | coding    | noncoding | noncoding |
| MSTRG. 83003. 6  | CPEB4        | XLOC_085380 | 4985  | coding | noncoding | noncoding | noncoding |
| MSTRG. 83104. 1  | FAM153B      | XLOC_085448 | 322   | coding | noncoding | coding    | noncoding |
| MSTRG. 83105. 1  | FAM153B      | XLOC_085449 | 407   | coding | noncoding | noncoding | noncoding |
| MSTRG. 83273. 1  | ZNF346       | XLOC_085507 | 390   | coding | noncoding | noncoding | noncoding |
| NR_109789. 1     | RAB24        | XLOC_085511 | 1753  | coding | coding    | coding    | coding    |
| MSTRG. 83352. 2  | NHP2         | XLOC_085575 | 3453  | coding | coding    | coding    | noncoding |
| MSTRG. 83471. 1  |              | XLOC_085624 | 213   | coding | coding    | noncoding | noncoding |
| MSTRG. 83501. 3  | LOC101928445 | XLOC_085634 | 2233  | coding | coding    | coding    | noncoding |
| MSTRG. 83501. 6  | LOC101928445 | XLOC_085634 | 1877  | coding | coding    | coding    | noncoding |
| MSTRG. 83495. 4  | CANX         | XLOC_085638 | 1578  | coding | coding    | noncoding | noncoding |
| MSTRG. 83515. 1  | SQSTM1       | XLOC_085644 | 2328  | coding | coding    | coding    | noncoding |
| MSTRG. 83515. 2  | MRNIP        | XLOC_085644 | 3220  | coding | coding    | coding    | coding    |
| MSTRG. 83515. 5  | MRNIP        | XLOC_085644 | 2571  | coding | coding    | coding    | coding    |
| MSTRG. 83515. 4  | MRNIP        | XLOC_085644 | 2622  | coding | coding    | coding    | coding    |
| MSTRG. 83592. 2  | CNOT6        | XLOC_085684 | 3099  | coding | coding    | noncoding | coding    |
| MSTRG. 83592. 5  | CNOT6        | XLOC_085684 | 2330  | coding | coding    | noncoding | coding    |
| MSTRG. 83640. 2  | BTNL8        | XLOC_085708 | 1991  | coding | coding    | noncoding | coding    |
| MSTRG. 83790. 1  | LOC102723944 | XLOC_085793 | 503   | coding | noncoding | noncoding | noncoding |
| MSTRG. 83852. 1  |              | XLOC_085854 | 294   | coding | coding    | noncoding | noncoding |
| MSTRG. 83887. 3  | SERPINB6     | XLOC_085868 | 1316  | coding | coding    | noncoding | noncoding |
| MSTRG. 83900. 7  | NQO2         | XLOC_085871 | 1612  | coding | noncoding | noncoding | noncoding |
| MSTRG. 83900. 8  | NQO2         | XLOC_085871 | 895   | coding | noncoding | coding    | noncoding |
| NR_104463. 1     | C6orf201     | XLOC_085949 | 3068  | coding | coding    | coding    | noncoding |
| MSTRG. 84047. 12 | C6orf201     | XLOC_085949 | 829   | coding | coding    | noncoding | noncoding |
| MSTRG. 84488. 5  | BMP6         | XLOC_086159 | 2969  | coding | coding    | coding    | noncoding |
| MSTRG. 84488. 3  | BMP6         | XLOC_086159 | 3214  | coding | coding    | coding    | noncoding |
| MSTRG. 84805. 15 | NEDD9        | XLOC_086280 | 14415 | coding | noncoding | coding    | coding    |
| MSTRG. 85034. 21 | NOL7         | XLOC_086396 | 2519  | coding | coding    | noncoding | noncoding |
| MSTRG. 85445. 2  | ATXN1        | XLOC_086512 | 10301 | coding | coding    | coding    | noncoding |
| MSTRG. 85270. 3  | LOC105374952 | XLOC_086549 | 4139  | coding | coding    | coding    | coding    |
| MSTRG. 85326. 2  | KDM1B        | XLOC_086560 | 7955  | coding | coding    | coding    | coding    |
| MSTRG. 85534. 4  | MBOAT1       | XLOC_086646 | 2967  | coding | coding    | noncoding | noncoding |
| NM_003512. 3     | HIST1H2AC    | XLOC_086909 | 546   | coding | coding    | coding    | coding    |
| NM_001145008. 2  | BTN3A1       | XLOC_086949 | 3232  | coding | coding    | coding    | coding    |
| MSTRG. 86163. 2  | ZNF322       | XLOC_086986 | 4796  | coding | coding    | coding    | noncoding |
| MSTRG. 86398. 2  | ZKSCAN4      | XLOC_087128 | 2489  | coding | coding    | coding    | coding    |
| MSTRG. 86398. 3  | ZKSCAN4      | XLOC_087128 | 1707  | coding | coding    | coding    | noncoding |
| NM_001007531. 3  | NKAPL        | XLOC_087129 | 1662  | coding | coding    | coding    | coding    |
| MSTRG. 86471. 2  | HLA-H        | XLOC_087203 | 2376  | coding | coding    | coding    | coding    |
| MSTRG. 86516. 2  | HLA-C        | XLOC_087251 | 1399  | coding | coding    | coding    | coding    |
| MSTRG. 86630. 2  | HLA-DRB5     | XLOC_087324 | 1139  | coding | coding    | coding    | noncoding |

|                |              |             |       |        |           |           |           |
|----------------|--------------|-------------|-------|--------|-----------|-----------|-----------|
| NM_014260.3    | PFDN6        | XLOC_087365 | 598   | coding | coding    | coding    | coding    |
| MSTRG.86693.1  | TAPBP        | XLOC_087367 | 2611  | coding | coding    | coding    | coding    |
| MSTRG.86698.3  | CUTA         | XLOC_087371 | 598   | coding | coding    | noncoding | noncoding |
| XM_011514404.2 | SCUBE3       | XLOC_087452 | 7476  | coding | coding    | coding    | coding    |
| MSTRG.86940.3  | FKBP5        | XLOC_087487 | 4498  | coding | coding    | coding    | coding    |
| MSTRG.86940.7  | FKBP5        | XLOC_087487 | 3651  | coding | coding    | coding    | coding    |
| MSTRG.86975.2  | SRPK1        | XLOC_087499 | 4300  | coding | coding    | noncoding | coding    |
| MSTRG.86975.3  | SRPK1        | XLOC_087499 | 4094  | coding | coding    | noncoding | noncoding |
| XM_011514310.3 | MAPK14       | XLOC_087511 | 4068  | coding | coding    | coding    | coding    |
| MSTRG.87357.1  | LOC107986593 | XLOC_087623 | 244   | coding | noncoding | noncoding | noncoding |
| MSTRG.87742.2  | MED20        | XLOC_087906 | 2126  | coding | coding    | coding    | noncoding |
| MSTRG.88018.3  | YIPF3        | XLOC_088024 | 1393  | coding | noncoding | noncoding | noncoding |
| MSTRG.88020.5  | POLR1C       | XLOC_088025 | 5243  | coding | coding    | coding    | coding    |
| MSTRG.88772.1  | SUPT3H       | XLOC_088091 | 5975  | coding | noncoding | noncoding | noncoding |
| NM_001015051.3 | RUNX2        | XLOC_088092 | 5487  | coding | coding    | coding    | coding    |
| MSTRG.88240.1  | TNFRSF21     | XLOC_088215 | 381   | coding | noncoding | coding    | noncoding |
| MSTRG.88462.2  | MCM3         | XLOC_088344 | 3214  | coding | coding    | coding    | noncoding |
| MSTRG.88587.6  | ELOVL5       | XLOC_088394 | 1723  | coding | coding    | coding    | noncoding |
| MSTRG.88978.1  | DST          | XLOC_088503 | 241   | coding | noncoding | noncoding | noncoding |
| MSTRG.88890.1  | PRIM2        | XLOC_088549 | 330   | coding | noncoding | noncoding | noncoding |
| MSTRG.89192.1  | KHDRBS2      | XLOC_088653 | 308   | coding | noncoding | noncoding | noncoding |
| XM_006715426.3 | PHF3         | XLOC_088691 | 8477  | coding | coding    | coding    | coding    |
| NM_001290260.1 | PHF3         | XLOC_088691 | 2969  | coding | noncoding | coding    | coding    |
| XR_001744208.1 | LOC105377862 | XLOC_089089 | 10681 | coding | noncoding | noncoding | noncoding |
| MSTRG.90236.1  |              | XLOC_089298 | 297   | coding | noncoding | noncoding | noncoding |
| MSTRG.90343.1  | UBE3D        | XLOC_089339 | 559   | coding | noncoding | noncoding | noncoding |
| MSTRG.90399.1  | ME1          | XLOC_089390 | 252   | coding | noncoding | noncoding | noncoding |
| NM_002526.4    | NT5E         | XLOC_089479 | 3562  | coding | coding    | coding    | coding    |
| NM_001168398.1 | SLC35A1      | XLOC_089562 | 1729  | coding | coding    | noncoding | coding    |
| MSTRG.90762.1  | LOC105377885 | XLOC_089603 | 1796  | coding | noncoding | noncoding | noncoding |
| MSTRG.90762.5  | LOC105377885 | XLOC_089603 | 6476  | coding | noncoding | coding    | noncoding |
| MSTRG.90762.6  | LOC105377885 | XLOC_089603 | 6261  | coding | noncoding | coding    | noncoding |
| MSTRG.90762.7  | LOC105377885 | XLOC_089603 | 1930  | coding | noncoding | noncoding | noncoding |
| MSTRG.90762.8  | LOC105377885 | XLOC_089603 | 932   | coding | noncoding | noncoding | noncoding |
| MSTRG.91054.3  | MAP3K7       | XLOC_089685 | 6107  | coding | coding    | noncoding | noncoding |
| MSTRG.91054.4  | MAP3K7       | XLOC_089685 | 3026  | coding | coding    | coding    | noncoding |
| MSTRG.91115.1  |              | XLOC_089753 | 245   | coding | noncoding | noncoding | noncoding |
| MSTRG.91141.1  |              | XLOC_089778 | 418   | coding | noncoding | noncoding | noncoding |
| MSTRG.91470.4  | FBXL4        | XLOC_089954 | 2799  | coding | coding    | noncoding | coding    |
| MSTRG.91767.6  | ASCC3        | XLOC_089997 | 1248  | coding | noncoding | coding    | noncoding |
| MSTRG.91872.4  | PREP         | XLOC_090085 | 19874 | coding | coding    | coding    | noncoding |
| MSTRG.91964.4  | ATG5         | XLOC_090139 | 808   | coding | coding    | noncoding | noncoding |

|                |              |             |       |        |           |           |           |
|----------------|--------------|-------------|-------|--------|-----------|-----------|-----------|
| MSTRG.92031.1  | CRYBG1       | XLOC_090157 | 679   | coding | coding    | noncoding | noncoding |
| MSTRG.92003.2  | CD24         | XLOC_090190 | 2102  | coding | coding    | noncoding | noncoding |
| MSTRG.92075.5  | SEC63        | XLOC_090217 | 1749  | coding | coding    | coding    | coding    |
| MSTRG.92221.1  | FOXO3        | XLOC_090258 | 447   | coding | noncoding | noncoding | noncoding |
| NM_032131.6    | ARMC2        | XLOC_090272 | 3734  | coding | noncoding | coding    | coding    |
| XM_011536168.3 | ARMC2        | XLOC_090272 | 2906  | coding | noncoding | coding    | coding    |
| MSTRG.92455.1  | AK9          | XLOC_090308 | 450   | coding | coding    | noncoding | noncoding |
| MSTRG.92270.1  | WASF1        | XLOC_090355 | 286   | coding | noncoding | noncoding | noncoding |
| MSTRG.92877.3  | TRAF3IP2-AS1 | XLOC_090429 | 13113 | coding | coding    | coding    | noncoding |
| MSTRG.92750.16 | LOC105377945 | XLOC_090439 | 2538  | coding | coding    | coding    | noncoding |
| MSTRG.92750.23 | LOC105377945 | XLOC_090439 | 2860  | coding | coding    | coding    | coding    |
| MSTRG.92750.25 | LOC105377945 | XLOC_090439 | 13952 | coding | coding    | noncoding | noncoding |
| NM_001010892.3 | RSPH4A       | XLOC_090606 | 2840  | coding | coding    | coding    | coding    |
| MSTRG.92809.2  | ZUP1         | XLOC_090609 | 1225  | coding | coding    | noncoding | coding    |
| MSTRG.93147.3  | CEP85L       | XLOC_090692 | 5568  | coding | noncoding | noncoding | noncoding |
| MSTRG.93147.9  | CEP85L       | XLOC_090692 | 2678  | coding | noncoding | coding    | coding    |
| MSTRG.93444.3  | MAN1A1       | XLOC_090738 | 1670  | coding | coding    | coding    | coding    |
| MSTRG.93416.2  | TBC1D32      | XLOC_090790 | 691   | coding | coding    | noncoding | noncoding |
| MSTRG.93827.2  | RNF146       | XLOC_090969 | 8880  | coding | coding    | coding    | coding    |
| MSTRG.93853.2  | THEMIS       | XLOC_091010 | 2181  | coding | coding    | noncoding | noncoding |
| NR_125849.1    | LOC101928140 | XLOC_091016 | 1818  | coding | noncoding | noncoding | noncoding |
| MSTRG.93995.1  |              | XLOC_091080 | 444   | coding | noncoding | noncoding | noncoding |
| MSTRG.93998.2  | ARHGAP18     | XLOC_091082 | 1369  | coding | coding    | noncoding | noncoding |
| MSTRG.94086.1  | LOC107986643 | XLOC_091152 | 1114  | coding | noncoding | noncoding | noncoding |
| MSTRG.94210.1  | LOC105378005 | XLOC_091195 | 293   | coding | coding    | noncoding | noncoding |
| MSTRG.94233.1  |              | XLOC_091211 | 300   | coding | noncoding | noncoding | noncoding |
| MSTRG.94274.5  | STX7         | XLOC_091242 | 4317  | coding | coding    | noncoding | noncoding |
| MSTRG.94333.3  | VNN3         | XLOC_091251 | 6616  | coding | noncoding | noncoding | noncoding |
| MSTRG.94305.2  | SLC18B1      | XLOC_091253 | 2538  | coding | coding    | coding    | noncoding |
| MSTRG.94305.6  | SLC18B1      | XLOC_091253 | 2303  | coding | coding    | coding    | noncoding |
| MSTRG.94606.13 | BCLAF1       | XLOC_091384 | 5167  | coding | coding    | noncoding | noncoding |
| MSTRG.94784.4  | MAP3K5       | XLOC_091403 | 5152  | coding | coding    | coding    | noncoding |
| NM_006290.4    | TNFAIP3      | XLOC_091453 | 4617  | coding | coding    | coding    | coding    |
| MSTRG.94835.1  | NHSL1        | XLOC_091483 | 421   | coding | noncoding | noncoding | noncoding |
| MSTRG.94889.1  | ECT2L        | XLOC_091513 | 279   | coding | noncoding | noncoding | noncoding |
| XM_017011151.1 | ABRACL       | XLOC_091523 | 830   | coding | coding    | noncoding | noncoding |
| MSTRG.94952.1  | TXLNB        | XLOC_091536 | 389   | coding | noncoding | noncoding | noncoding |
| MSTRG.95054.1  |              | XLOC_091602 | 286   | coding | noncoding | noncoding | noncoding |
| MSTRG.95171.3  | LOC107986655 | XLOC_091651 | 12003 | coding | coding    | coding    | coding    |
| MSTRG.95171.7  | HIVEP2       | XLOC_091651 | 13519 | coding | coding    | coding    | coding    |
| XM_011535453.1 | STXBP5       | XLOC_091897 | 9073  | coding | coding    | coding    | coding    |
| MSTRG.95762.3  | NUP43        | XLOC_092033 | 2114  | coding | noncoding | noncoding | noncoding |

|                |              |             |       |        |           |           |           |
|----------------|--------------|-------------|-------|--------|-----------|-----------|-----------|
| MSTRG.96141.36 | OPRM1        | XLOC_092164 | 5730  | coding | coding    | noncoding | noncoding |
| MSTRG.96527.1  | SERAC1       | XLOC_092555 | 384   | coding | noncoding | noncoding | noncoding |
| MSTRG.96686.4  | SYTL3        | XLOC_092584 | 6916  | coding | coding    | coding    | coding    |
| MSTRG.96718.3  | RSPH3        | XLOC_092608 | 929   | coding | coding    | noncoding | noncoding |
| MSTRG.97017.1  |              | XLOC_092666 | 7396  | coding | noncoding | noncoding | noncoding |
| MSTRG.97063.3  | SOD2         | XLOC_092674 | 983   | coding | coding    | coding    | noncoding |
| MSTRG.97069.1  | SOD2         | XLOC_092680 | 950   | coding | noncoding | coding    | coding    |
| NM_004906.5    | WTAP         | XLOC_092685 | 2124  | coding | coding    | coding    | coding    |
| NM_152857.2    | WTAP         | XLOC_092685 | 1716  | coding | coding    | coding    | coding    |
| NM_001270531.2 | WTAP         | XLOC_092685 | 2105  | coding | coding    | coding    | coding    |
| MSTRG.97873.1  | PRKN         | XLOC_092922 | 312   | coding | noncoding | noncoding | noncoding |
| MSTRG.97379.2  | MPC1         | XLOC_093114 | 834   | coding | coding    | noncoding | noncoding |
| MSTRG.97646.1  | WDR27        | XLOC_093233 | 319   | coding | noncoding | noncoding | noncoding |
| MSTRG.97649.1  | WDR27        | XLOC_093236 | 237   | coding | noncoding | noncoding | noncoding |
| MSTRG.83722.2  | IRF4         | XLOC_093333 | 5076  | coding | coding    | coding    | noncoding |
| NM_001347872.2 | MYLK4        | XLOC_093467 | 5886  | coding | coding    | coding    | coding    |
| NR_073112.1    | SERPINB1     | XLOC_093481 | 2658  | coding | coding    | coding    | coding    |
| MSTRG.84040.4  | PRPF4B       | XLOC_093546 | 7532  | coding | coding    | coding    | coding    |
| MSTRG.84067.1  | CDYL         | XLOC_093572 | 5845  | coding | coding    | coding    | noncoding |
| XM_017010865.1 | MAK          | XLOC_093781 | 3832  | coding | coding    | coding    | coding    |
| MSTRG.84695.2  | SMIM13       | XLOC_093800 | 2639  | coding | coding    | coding    | noncoding |
| MSTRG.84912.5  | HIVEP1       | XLOC_093896 | 8520  | coding | coding    | coding    | coding    |
| MSTRG.85299.13 | JARID2       | XLOC_094064 | 4661  | coding | noncoding | noncoding | noncoding |
| MSTRG.85189.5  | MYLIP        | XLOC_094092 | 18131 | coding | coding    | coding    | noncoding |
| MSTRG.85529.2  | LOC101928433 | XLOC_094170 | 1509  | coding | noncoding | coding    | noncoding |
| MSTRG.85327.3  | DEK          | XLOC_094240 | 7681  | coding | coding    | coding    | coding    |
| MSTRG.85351.4  | RNF144B      | XLOC_094247 | 4357  | coding | noncoding | noncoding | noncoding |
| MSTRG.85565.9  | E2F3         | XLOC_094305 | 4341  | coding | coding    | noncoding | noncoding |
| MSTRG.85952.21 | RIPOR2       | XLOC_094434 | 9348  | coding | coding    | coding    | coding    |
| MSTRG.86077.1  | HIST1H2AC    | XLOC_094569 | 2263  | coding | noncoding | noncoding | noncoding |
| MSTRG.86299.24 | BTN2A2       | XLOC_094609 | 2579  | coding | coding    | coding    | coding    |
| MSTRG.86299.27 | BTN3A3       | XLOC_094609 | 3012  | coding | coding    | coding    | noncoding |
| NM_003519.3    | HIST1H2BL    | XLOC_094714 | 453   | coding | coding    | coding    | coding    |
| MSTRG.86321.6  | OR2B6        | XLOC_094719 | 829   | coding | coding    | noncoding | coding    |
| MSTRG.86416.1  | PGBD1        | XLOC_094761 | 267   | coding | coding    | noncoding | noncoding |
| MSTRG.86458.1  |              | XLOC_094831 | 1237  | coding | noncoding | noncoding | noncoding |
| NM_001363515.1 | DHX16        | XLOC_094846 | 4137  | coding | coding    | coding    | coding    |
| XM_006715005.3 | DXO          | XLOC_094914 | 1668  | coding | coding    | coding    | coding    |
| NM_001202470.2 | RPS10-NUDT3  | XLOC_095013 | 2529  | coding | coding    | coding    | coding    |
| MSTRG.86868.3  | ZNF76        | XLOC_095075 | 4520  | coding | coding    | coding    | coding    |
| XR_001743146.1 | STK38        | XLOC_095168 | 3467  | coding | coding    | coding    | coding    |
| MSTRG.87359.12 | ZFAND3       | XLOC_095232 | 2003  | coding | noncoding | noncoding | noncoding |

|                  |              |             |       |        |           |           |           |
|------------------|--------------|-------------|-------|--------|-----------|-----------|-----------|
| MSTRG. 87359. 16 | ZFAND3       | XLOC_095232 | 4777  | coding | noncoding | coding    | noncoding |
| MSTRG. 87659. 20 | OARD1        | XLOC_095404 | 4785  | coding | coding    | coding    | noncoding |
| XM_017011042. 1  | TRERF1       | XLOC_095510 | 9026  | coding | coding    | coding    | coding    |
| MSTRG. 87855. 4  | BICRAL       | XLOC_095547 | 2216  | coding | noncoding | noncoding | noncoding |
| MSTRG. 88041. 4  | LOC107986599 | XLOC_095646 | 2797  | coding | coding    | coding    | noncoding |
| MSTRG. 88041. 5  | TMEM63B      | XLOC_095646 | 1915  | coding | coding    | coding    | noncoding |
| MSTRG. 88260. 2  | CD2AP        | XLOC_095791 | 2538  | coding | coding    | coding    | coding    |
| MSTRG. 89022. 11 | ZNF451       | XLOC_096085 | 3461  | coding | coding    | coding    | noncoding |
| MSTRG. 89420. 2  | FAM135A      | XLOC_096310 | 2138  | coding | coding    | coding    | noncoding |
| MSTRG. 89420. 4  | FAM135A      | XLOC_096310 | 2018  | coding | coding    | noncoding | noncoding |
| MSTRG. 89495. 1  |              | XLOC_096334 | 415   | coding | noncoding | noncoding | noncoding |
| MSTRG. 89779. 6  | SENP6        | XLOC_096483 | 5410  | coding | coding    | coding    | noncoding |
| MSTRG. 90147. 1  | BCKDHB       | XLOC_096648 | 294   | coding | coding    | noncoding | noncoding |
| MSTRG. 90654. 4  | ZNF292       | XLOC_096847 | 7513  | coding | coding    | coding    | noncoding |
| MSTRG. 90691. 1  | SMIM8        | XLOC_096859 | 441   | coding | coding    | noncoding | noncoding |
| MSTRG. 90702. 2  | C6orf163     | XLOC_096865 | 323   | coding | noncoding | noncoding | noncoding |
| NM_032870. 4     | PNISR        | XLOC_097339 | 5113  | coding | coding    | coding    | coding    |
| XM_005266912. 4  | PNISR        | XLOC_097339 | 5190  | coding | coding    | coding    | coding    |
| NM_001346030. 2  | USP45        | XLOC_097347 | 5207  | coding | coding    | coding    | coding    |
| MSTRG. 91716. 1  | TSTD3        | XLOC_097351 | 335   | coding | noncoding | noncoding | noncoding |
| MSTRG. 91718. 1  | TSTD3        | XLOC_097353 | 448   | coding | noncoding | noncoding | noncoding |
| MSTRG. 92025. 3  | RTN4IP1      | XLOC_097595 | 9539  | coding | coding    | coding    | coding    |
| MSTRG. 92176. 1  | AFG1L        | XLOC_097680 | 309   | coding | coding    | noncoding | noncoding |
| MSTRG. 92213. 3  | FOXO3        | XLOC_097693 | 10660 | coding | coding    | coding    | noncoding |
| MSTRG. 92213. 5  | FOXO3        | XLOC_097693 | 14811 | coding | coding    | coding    | noncoding |
| MSTRG. 92373. 3  | CDC40        | XLOC_097811 | 3676  | coding | coding    | noncoding | noncoding |
| MSTRG. 92883. 1  | TRAF3IP2-AS1 | XLOC_097895 | 318   | coding | noncoding | noncoding | noncoding |
| MSTRG. 92983. 3  | NT5DC1       | XLOC_098049 | 1764  | coding | coding    | noncoding | noncoding |
| MSTRG. 92983. 10 | COL10A1      | XLOC_098049 | 11980 | coding | noncoding | noncoding | noncoding |
| MSTRG. 93023. 1  | DSE          | XLOC_098059 | 384   | coding | noncoding | coding    | noncoding |
| MSTRG. 92915. 1  | DCBLD1       | XLOC_098132 | 394   | coding | noncoding | noncoding | noncoding |
| MSTRG. 92941. 1  | GOPC         | XLOC_098158 | 322   | coding | noncoding | noncoding | noncoding |
| XM_011535571. 3  | TBC1D32      | XLOC_098319 | 6010  | coding | coding    | coding    | coding    |
| MSTRG. 93398. 1  | PKIB         | XLOC_098382 | 297   | coding | coding    | noncoding | noncoding |
| MSTRG. 93723. 6  | TRMT11       | XLOC_098499 | 845   | coding | noncoding | noncoding | noncoding |
| MSTRG. 93648. 1  |              | XLOC_098557 | 269   | coding | noncoding | noncoding | noncoding |
| MSTRG. 94121. 2  | SAMD3        | XLOC_098695 | 2606  | coding | coding    | noncoding | noncoding |
| MSTRG. 94121. 4  | SAMD3        | XLOC_098695 | 2572  | coding | coding    | noncoding | noncoding |
| MSTRG. 94566. 1  | PDE7B        | XLOC_098980 | 497   | coding | coding    | coding    | noncoding |
| MSTRG. 94645. 1  | PEX7         | XLOC_099069 | 306   | coding | noncoding | noncoding | noncoding |
| MSTRG. 94876. 2  | ABRACL       | XLOC_099186 | 688   | coding | coding    | noncoding | noncoding |
| MSTRG. 94933. 7  | HECA         | XLOC_099191 | 16233 | coding | coding    | coding    | coding    |

|                   |              |             |       |        |           |           |           |
|-------------------|--------------|-------------|-------|--------|-----------|-----------|-----------|
| MSTRG. 95327. 4   | PHACTR2      | XLOC_099392 | 8454  | coding | coding    | coding    | noncoding |
| MSTRG. 95458. 12  | UTRN         | XLOC_099423 | 16641 | coding | coding    | coding    | noncoding |
| MSTRG. 95458. 24  | UTRN         | XLOC_099423 | 5577  | coding | coding    | coding    | noncoding |
| NM_001348092. 2   | FBXO30       | XLOC_099463 | 8962  | coding | coding    | coding    | coding    |
| MSTRG. 95985. 1   |              | XLOC_099599 | 412   | coding | noncoding | noncoding | noncoding |
| MSTRG. 96013. 6   | TAB2         | XLOC_099614 | 8006  | coding | coding    | noncoding | noncoding |
| MSTRG. 96013. 7   | TAB2         | XLOC_099614 | 7211  | coding | coding    | noncoding | noncoding |
| MSTRG. 95916. 2   | ARMT1        | XLOC_099741 | 1831  | coding | coding    | noncoding | noncoding |
| MSTRG. 96424. 1   | ESR1         | XLOC_099770 | 252   | coding | coding    | noncoding | noncoding |
| MSTRG. 96579. 9   | ARID1B       | XLOC_100027 | 3797  | coding | noncoding | noncoding | noncoding |
| MSTRG. 96612. 1   | ARID1B       | XLOC_100031 | 592   | coding | noncoding | noncoding | noncoding |
| MSTRG. 96677. 5   | TMEM181      | XLOC_100131 | 4230  | coding | coding    | noncoding | noncoding |
| XM_011536110. 1   | EZR          | XLOC_100133 | 2523  | coding | coding    | coding    | coding    |
| MSTRG. 96725. 1   | LOC105378083 | XLOC_100146 | 206   | coding | noncoding | noncoding | noncoding |
| NM_001322820. 2   | SOD2         | XLOC_100198 | 14169 | coding | coding    | coding    | coding    |
| MSTRG. 97061. 17  | WTAP         | XLOC_100198 | 2751  | coding | coding    | noncoding | noncoding |
| MSTRG. 97141. 3   | IGF2R        | XLOC_100211 | 10081 | coding | coding    | coding    | noncoding |
| MSTRG. 97196. 1   | SLC22A1      | XLOC_100232 | 357   | coding | noncoding | noncoding | noncoding |
| MSTRG. 97223. 1   |              | XLOC_100269 | 266   | coding | noncoding | noncoding | noncoding |
| MSTRG. 97970. 1   | FAM120B      | XLOC_100636 | 3787  | coding | noncoding | noncoding | noncoding |
| MSTRG. 97970. 3   | FAM120B      | XLOC_100636 | 6733  | coding | noncoding | coding    | noncoding |
| NM_001363655. 2   | PDCD2        | XLOC_100646 | 1107  | coding | coding    | coding    | coding    |
| MSTRG. 97993. 2   | LOC105375112 | XLOC_100652 | 3778  | coding | noncoding | coding    | coding    |
| MSTRG. 98193. 4   | C7orf50      | XLOC_100703 | 1238  | coding | coding    | coding    | noncoding |
| NM_001033518. 2   | WIP12        | XLOC_100858 | 4412  | coding | noncoding | coding    | coding    |
| MSTRG. 98642. 3   | RNF216       | XLOC_100890 | 4596  | coding | noncoding | coding    | coding    |
| MSTRG. 98672. 23  | AIMP2        | XLOC_100902 | 4289  | coding | coding    | noncoding | coding    |
| MSTRG. 98726. 2   | DAGLB        | XLOC_100935 | 2633  | coding | coding    | coding    | coding    |
| MSTRG. 98837. 1   | C1GALT1      | XLOC_100986 | 217   | coding | noncoding | noncoding | noncoding |
| MSTRG. 99524. 1   |              | XLOC_101497 | 296   | coding | noncoding | noncoding | noncoding |
| MSTRG. 99709. 6   | SNX13        | XLOC_101511 | 2207  | coding | coding    | noncoding | noncoding |
| NM_016447. 4      | MPP6         | XLOC_101826 | 8515  | coding | coding    | coding    | coding    |
| MSTRG. 100267. 1  | LOC107986779 | XLOC_101839 | 709   | coding | noncoding | noncoding | noncoding |
| MSTRG. 100270. 2  | OSBPL3       | XLOC_101842 | 6254  | coding | coding    | noncoding | coding    |
| MSTRG. 100297. 4  | NFE2L3       | XLOC_101897 | 11178 | coding | coding    | noncoding | coding    |
| MSTRG. 100297. 5  | NFE2L3       | XLOC_101897 | 9146  | coding | coding    | noncoding | coding    |
| MSTRG. 100297. 11 | NFE2L3       | XLOC_101897 | 9590  | coding | coding    | noncoding | coding    |
| NM_001362753. 1   | SNX10        | XLOC_101904 | 2844  | coding | coding    | coding    | coding    |
| NR_038831. 1      | HOXA-AS3     | XLOC_101972 | 3992  | coding | coding    | coding    | noncoding |
| MSTRG. 100387. 1  |              | XLOC_101985 | 569   | coding | coding    | noncoding | noncoding |
| MSTRG. 100511. 18 | JAZF1-AS1    | XLOC_101996 | 1919  | coding | noncoding | coding    | noncoding |
| XR_001744893. 2   | CREB5        | XLOC_102002 | 7914  | coding | coding    | coding    | coding    |

|                   |                  |             |       |        |           |           |           |
|-------------------|------------------|-------------|-------|--------|-----------|-----------|-----------|
| MSTRG. 100933. 4  | GARS             | XLOC_102145 | 12950 | coding | coding    | coding    | coding    |
| MSTRG. 101060. 7  | DPY19L1P1        | XLOC_102222 | 1180  | coding | coding    | noncoding | noncoding |
| MSTRG. 101315. 1  | EEPD1            | XLOC_102371 | 345   | coding | noncoding | noncoding | noncoding |
| MSTRG. 101395. 8  | AOAH             | XLOC_102392 | 2619  | coding | coding    | noncoding | noncoding |
| MSTRG. 101395. 9  | AOAH             | XLOC_102392 | 6426  | coding | coding    | noncoding | noncoding |
| MSTRG. 101804. 1  |                  | XLOC_102401 | 307   | coding | noncoding | noncoding | noncoding |
| XM_017012693. 1   | STARD3NL         | XLOC_102456 | 1708  | coding | coding    | coding    | coding    |
| MSTRG. 101666. 48 | TRG-AS1          | XLOC_102462 | 280   | coding | noncoding | noncoding | noncoding |
| MSTRG. 101642. 1  |                  | XLOC_102560 | 226   | coding | noncoding | noncoding | noncoding |
| MSTRG. 102190. 3  | STK17A           | XLOC_102660 | 2618  | coding | coding    | coding    | coding    |
| MSTRG. 102190. 11 | COA1             | XLOC_102660 | 1170  | coding | coding    | noncoding | noncoding |
| XM_017012017. 2   | SPDYE1           | XLOC_102678 | 1904  | coding | coding    | coding    | coding    |
| MSTRG. 102239. 3  | H2AFV            | XLOC_102722 | 3730  | coding | coding    | noncoding | noncoding |
| XR_002956418. 1   | SUMF2            | XLOC_103132 | 2250  | coding | coding    | coding    | coding    |
| MSTRG. 103359. 6  | ZNF117           | XLOC_103315 | 15247 | coding | coding    | coding    | noncoding |
| MSTRG. 103371. 1  | CCT6P3           | XLOC_103323 | 255   | coding | noncoding | noncoding | noncoding |
| MSTRG. 103555. 1  |                  | XLOC_103394 | 497   | coding | noncoding | noncoding | noncoding |
| MSTRG. 103868. 6  | NCF1C            | XLOC_103653 | 1322  | coding | coding    | coding    | coding    |
| NM_001346186. 1   | RHBDD2           | XLOC_103703 | 1955  | coding | coding    | coding    | coding    |
| NR_023383. 1      | DTX2P1-UPK3BP1-P | XLOC_103752 | 1763  | coding | coding    | coding    | coding    |
|                   | MS2P11           |             |       |        |           |           |           |
| MSTRG. 104781. 3  | FAM185BP         | XLOC_103755 | 1449  | coding | noncoding | coding    | noncoding |
| MSTRG. 104781. 6  | FAM185BP         | XLOC_103755 | 1238  | coding | noncoding | coding    | noncoding |
| MSTRG. 104825. 2  | GSAP             | XLOC_103783 | 4753  | coding | coding    | coding    | noncoding |
| MSTRG. 104936. 3  | LOC102723885     | XLOC_104094 | 1029  | coding | coding    | noncoding | noncoding |
| MSTRG. 105114. 1  |                  | XLOC_104234 | 329   | coding | noncoding | noncoding | noncoding |
| MSTRG. 105129. 1  |                  | XLOC_104247 | 257   | coding | noncoding | noncoding | noncoding |
| MSTRG. 105143. 1  |                  | XLOC_104259 | 200   | coding | noncoding | noncoding | noncoding |
| XM_017011644. 2   | AKAP9            | XLOC_104272 | 14780 | coding | coding    | noncoding | coding    |
| MSTRG. 105164. 1  |                  | XLOC_104277 | 269   | coding | noncoding | noncoding | noncoding |
| MSTRG. 105386. 2  | HEPACAM2         | XLOC_104303 | 2020  | coding | coding    | noncoding | noncoding |
| MSTRG. 105664. 2  | MIR5692A1        | XLOC_104452 | 8548  | coding | coding    | coding    | noncoding |
| MSTRG. 106602. 7  | LOC100630923     | XLOC_104714 | 1142  | coding | noncoding | noncoding | noncoding |
| MSTRG. 106619. 10 | POLR2J           | XLOC_104720 | 524   | coding | coding    | noncoding | noncoding |
| MSTRG. 106619. 21 | POLR2J2          | XLOC_104720 | 1393  | coding | noncoding | coding    | coding    |
| XM_017012223. 1   | SPDYE2           | XLOC_104725 | 4899  | coding | coding    | coding    | coding    |
| MSTRG. 106645. 25 | LRRC17           | XLOC_104734 | 1826  | coding | coding    | noncoding | noncoding |
| MSTRG. 106654. 2  | FAM185A          | XLOC_104739 | 11771 | coding | coding    | noncoding | coding    |
| MSTRG. 106432. 13 | KMT2E            | XLOC_104806 | 13694 | coding | coding    | coding    | coding    |
| MSTRG. 106202. 2  | PUS7             | XLOC_104815 | 214   | coding | noncoding | noncoding | noncoding |
| MSTRG. 106282. 4  | ATXN7L1          | XLOC_104822 | 719   | coding | coding    | noncoding | noncoding |
| NM_001282427. 2   | PIK3CG           | XLOC_104894 | 6983  | coding | coding    | coding    | coding    |

|                 |               |             |       |        |           |           |           |
|-----------------|---------------|-------------|-------|--------|-----------|-----------|-----------|
| NM_001282426.2  | PIK3CG        | XLOC_104894 | 7059  | coding | coding    | coding    | coding    |
| NM_001289751.1  | DLD           | XLOC_104927 | 3544  | coding | coding    | coding    | coding    |
| MSTRG.106504.1  | NRCAM         | XLOC_104970 | 256   | coding | noncoding | noncoding | noncoding |
| MSTRG.107477.1  | IMMP2L        | XLOC_105078 | 828   | coding | coding    | noncoding | noncoding |
| MSTRG.107522.1  | IMMP2L        | XLOC_105107 | 361   | coding | noncoding | noncoding | noncoding |
| MSTRG.107603.1  | CPED1         | XLOC_105486 | 278   | coding | noncoding | noncoding | noncoding |
| MSTRG.108521.15 | LINC-PINT     | XLOC_105841 | 4344  | coding | noncoding | noncoding | noncoding |
| MSTRG.108521.24 | LINC-PINT     | XLOC_105841 | 12730 | coding | noncoding | coding    | noncoding |
| MSTRG.108521.27 | LINC-PINT     | XLOC_105841 | 2043  | coding | noncoding | noncoding | noncoding |
| MSTRG.109094.3  | KDM7A         | XLOC_106384 | 9112  | coding | coding    | coding    | noncoding |
| MSTRG.109143.6  | BRAF          | XLOC_106413 | 10073 | coding | coding    | coding    | noncoding |
| NR_126022.1     | LOC101928605  | XLOC_106605 | 990   | coding | coding    | noncoding | noncoding |
| NM_170686.3     | ZNF398        | XLOC_106734 | 5460  | coding | coding    | coding    | coding    |
| MSTRG.109908.6  | ZNF746        | XLOC_106759 | 5823  | coding | noncoding | noncoding | noncoding |
| MSTRG.110143.1  | ACTR3C        | XLOC_106844 | 1278  | coding | noncoding | noncoding | noncoding |
| MSTRG.110156.1  | ACTR3C        | XLOC_106857 | 304   | coding | noncoding | noncoding | noncoding |
| MSTRG.110164.1  | ACTR3C        | XLOC_106865 | 249   | coding | noncoding | noncoding | noncoding |
| MSTRG.110171.1  | ACTR3C        | XLOC_106872 | 756   | coding | noncoding | noncoding | noncoding |
| MSTRG.110055.3  | GIMAP6        | XLOC_106922 | 4097  | coding | coding    | coding    | noncoding |
| MSTRG.110055.4  | GIMAP6        | XLOC_106922 | 5837  | coding | coding    | coding    | noncoding |
| NM_001199577.1  | GIMAP1-GIMAP5 | XLOC_106929 | 2262  | coding | coding    | coding    | coding    |
| MSTRG.109983.1  | LOC105375566  | XLOC_106940 | 2801  | coding | coding    | noncoding | noncoding |
| MSTRG.109994.3  | TMEM176B      | XLOC_106942 | 1104  | coding | coding    | noncoding | noncoding |
| MSTRG.109994.4  | TMEM176B      | XLOC_106942 | 1202  | coding | coding    | coding    | noncoding |
| MSTRG.110495.17 | KMT2C         | XLOC_106999 | 3709  | coding | coding    | coding    | coding    |
| MSTRG.110733.34 | LMBR1         | XLOC_107161 | 224   | coding | noncoding | noncoding | noncoding |
| MSTRG.98198.7   | GPR146        | XLOC_107302 | 1991  | coding | coding    | coding    | noncoding |
| MSTRG.98267.2   | EIF3B         | XLOC_107372 | 3152  | coding | coding    | coding    | coding    |
| MSTRG.98299.2   | CHST12        | XLOC_107373 | 2117  | coding | coding    | coding    | noncoding |
| MSTRG.98685.2   | USP42         | XLOC_107608 | 1070  | coding | coding    | noncoding | coding    |
| MSTRG.98877.3   | MIOS          | XLOC_107690 | 3841  | coding | coding    | coding    | noncoding |
| MSTRG.99576.5   | RPA3          | XLOC_107695 | 4428  | coding | noncoding | coding    | noncoding |
| MSTRG.99381.1   | AGMO          | XLOC_107934 | 921   | coding | noncoding | noncoding | noncoding |
| MSTRG.100633.1  | HDAC9         | XLOC_108124 | 478   | coding | noncoding | noncoding | noncoding |
| MSTRG.100147.1  | MPP6          | XLOC_108320 | 1271  | coding | coding    | noncoding | noncoding |
| MSTRG.100512.11 | TAX1BP1       | XLOC_108520 | 9653  | coding | coding    | noncoding | noncoding |
| MSTRG.100512.12 | TAX1BP1       | XLOC_108520 | 2872  | coding | coding    | noncoding | noncoding |
| MSTRG.100512.13 | TAX1BP1       | XLOC_108520 | 5297  | coding | noncoding | noncoding | noncoding |
| MSTRG.101912.1  | ELMO1         | XLOC_109032 | 363   | coding | noncoding | noncoding | noncoding |
| MSTRG.101486.10 | GPR141        | XLOC_109088 | 3468  | coding | coding    | noncoding | noncoding |
| MSTRG.101486.18 | GPR141        | XLOC_109088 | 13545 | coding | noncoding | noncoding | noncoding |
| MSTRG.101486.17 | GPR141        | XLOC_109088 | 2249  | coding | noncoding | noncoding | noncoding |

|                   |          |             |       |        |           |           |           |
|-------------------|----------|-------------|-------|--------|-----------|-----------|-----------|
| MSTRG. 101486. 23 | NME8     | XLOC_109088 | 4959  | coding | coding    | noncoding | noncoding |
| MSTRG. 101497. 4  | NME8     | XLOC_109090 | 1311  | coding | coding    | noncoding | noncoding |
| MSTRG. 101668. 38 | TRGC2    | XLOC_109105 | 4216  | coding | coding    | coding    | coding    |
| MSTRG. 101668. 49 | TRG-AS1  | XLOC_109105 | 592   | coding | noncoding | noncoding | noncoding |
| MSTRG. 101668. 50 | TRGC2    | XLOC_109105 | 4060  | coding | coding    | coding    | noncoding |
| MSTRG. 101668. 53 | TRGC2    | XLOC_109105 | 4395  | coding | coding    | coding    | noncoding |
| MSTRG. 101668. 57 | TRG-AS1  | XLOC_109105 | 3953  | coding | noncoding | noncoding | noncoding |
| MSTRG. 101668. 61 | TRGC2    | XLOC_109105 | 1354  | coding | noncoding | noncoding | noncoding |
| MSTRG. 101668. 63 | TRGC2    | XLOC_109105 | 4052  | coding | coding    | coding    | noncoding |
| MSTRG. 102045. 1  | SUGCT    | XLOC_109241 | 292   | coding | noncoding | noncoding | noncoding |
| MSTRG. 102189. 4  | COA1     | XLOC_109371 | 3187  | coding | coding    | noncoding | noncoding |
| MSTRG. 102189. 5  | COA1     | XLOC_109371 | 10555 | coding | coding    | noncoding | noncoding |
| XM_024446827. 1   | COA1     | XLOC_109371 | 10449 | coding | coding    | coding    | noncoding |
| MSTRG. 102321. 7  | CCM2     | XLOC_109466 | 2065  | coding | coding    | coding    | noncoding |
| MSTRG. 102321. 12 | CCM2     | XLOC_109466 | 627   | coding | noncoding | coding    | noncoding |
| MSTRG. 102616. 1  | ABCA13   | XLOC_109593 | 2341  | coding | noncoding | noncoding | noncoding |
| MSTRG. 102622. 1  | ABCA13   | XLOC_109599 | 484   | coding | noncoding | noncoding | noncoding |
| MSTRG. 102626. 1  | ABCA13   | XLOC_109602 | 1175  | coding | noncoding | noncoding | coding    |
| MSTRG. 103252. 7  | ZNF107   | XLOC_109936 | 5071  | coding | coding    | noncoding | noncoding |
| MSTRG. 103211. 1  | ZNF138   | XLOC_109945 | 1542  | coding | noncoding | noncoding | noncoding |
| NM_001007253. 4   | ERV3-1   | XLOC_109956 | 3206  | coding | coding    | noncoding | coding    |
| MSTRG. 103587. 2  | GTF2IP23 | XLOC_110013 | 498   | coding | noncoding | noncoding | noncoding |
| MSTRG. 103491. 3  | TYW1     | XLOC_110023 | 916   | coding | coding    | noncoding | coding    |
| MSTRG. 103491. 4  | TYW1     | XLOC_110023 | 1251  | coding | coding    | noncoding | noncoding |
| MSTRG. 103819. 5  | NCF1B    | XLOC_110358 | 1459  | coding | coding    | coding    | noncoding |
| MSTRG. 104730. 4  | SSC4D    | XLOC_110487 | 522   | coding | coding    | coding    | noncoding |
| MSTRG. 105054. 1  | DBF4     | XLOC_110814 | 577   | coding | noncoding | noncoding | coding    |
| MSTRG. 105229. 3  | AKAP9    | XLOC_110944 | 2841  | coding | noncoding | noncoding | noncoding |
| MSTRG. 105229. 9  | AKAP9    | XLOC_110944 | 2028  | coding | noncoding | coding    | noncoding |
| MSTRG. 105707. 2  | LMTK2    | XLOC_111232 | 2376  | coding | coding    | coding    | noncoding |
| MSTRG. 105773. 3  | PDAP1    | XLOC_111279 | 1661  | coding | coding    | coding    | noncoding |
| NM_024637. 5      | GAL3ST4  | XLOC_111344 | 2405  | coding | coding    | coding    | coding    |
| MSTRG. 106042. 17 | ZCWPW1   | XLOC_111352 | 959   | coding | coding    | coding    | noncoding |
| MSTRG. 105968. 3  | SLC12A9  | XLOC_111385 | 2021  | coding | coding    | coding    | coding    |
| MSTRG. 105974. 1  | TRIP6    | XLOC_111387 | 325   | coding | noncoding | noncoding | noncoding |
| MSTRG. 106611. 2  | ORAI2    | XLOC_111441 | 4686  | coding | coding    | coding    | noncoding |
| MSTRG. 106611. 3  | ORAI2    | XLOC_111441 | 1633  | coding | coding    | coding    | noncoding |
| XR_927408. 3      | FBXL13   | XLOC_111472 | 2927  | coding | coding    | coding    | coding    |
| MSTRG. 106663. 26 | ARMC10   | XLOC_111472 | 1178  | coding | coding    | noncoding | noncoding |
| MSTRG. 106438. 12 | KMT2E    | XLOC_111529 | 4226  | coding | noncoding | coding    | noncoding |
| MSTRG. 106438. 18 | KMT2E    | XLOC_111529 | 2336  | coding | coding    | noncoding | noncoding |
| XR_001744796. 2   | PNPLA8   | XLOC_111657 | 4179  | coding | coding    | coding    | coding    |

|                   |              |             |       |        |           |           |           |
|-------------------|--------------|-------------|-------|--------|-----------|-----------|-----------|
| MSTRG. 106931. 2  | ZNF277       | XLOC_111853 | 2185  | coding | coding    | noncoding | noncoding |
| MSTRG. 106979. 6  | MDFIC        | XLOC_111946 | 1488  | coding | noncoding | coding    | noncoding |
| MSTRG. 107997. 5  | LOC101928451 | XLOC_112325 | 3867  | coding | noncoding | coding    | noncoding |
| MSTRG. 107997. 18 | LOC101928451 | XLOC_112325 | 1365  | coding | noncoding | noncoding | noncoding |
| NM_001708. 2      | OPN1SW       | XLOC_112333 | 1098  | coding | coding    | coding    | coding    |
| MSTRG. 108132. 3  | AHCYL2       | XLOC_112366 | 2503  | coding | coding    | coding    | coding    |
| MSTRG. 108169. 4  | NRF1         | XLOC_112381 | 3003  | coding | coding    | noncoding | coding    |
| NR_015431. 2      | LINC-PINT    | XLOC_112467 | 3128  | coding | noncoding | noncoding | noncoding |
| MSTRG. 108592. 1  | MKLN1        | XLOC_112500 | 10382 | coding | coding    | coding    | noncoding |
| MSTRG. 108592. 11 | MKLN1        | XLOC_112500 | 2701  | coding | coding    | noncoding | coding    |
| MSTRG. 108592. 10 | MKLN1        | XLOC_112500 | 10460 | coding | coding    | noncoding | noncoding |
| MSTRG. 108592. 17 | MKLN1        | XLOC_112500 | 3498  | coding | coding    | noncoding | noncoding |
| MSTRG. 108354. 1  |              | XLOC_112590 | 238   | coding | noncoding | noncoding | noncoding |
| MSTRG. 108355. 1  |              | XLOC_112591 | 326   | coding | noncoding | noncoding | noncoding |
| MSTRG. 108747. 4  | CYREN        | XLOC_112629 | 7515  | coding | coding    | coding    | noncoding |
| MSTRG. 109035. 1  | LOC105375523 | XLOC_112696 | 304   | coding | noncoding | noncoding | noncoding |
| MSTRG. 109036. 1  | LOC105375523 | XLOC_112697 | 407   | coding | noncoding | noncoding | noncoding |
| MSTRG. 109073. 2  | LOC100129148 | XLOC_112829 | 5739  | coding | coding    | coding    | noncoding |
| MSTRG. 109263. 19 | TBXAS1       | XLOC_112851 | 2222  | coding | coding    | coding    | coding    |
| XM_017012558. 1   | BRAF         | XLOC_112882 | 9595  | coding | coding    | coding    | coding    |
| MSTRG. 109190. 2  | AGK          | XLOC_112918 | 838   | coding | coding    | coding    | noncoding |
| MSTRG. 109321. 2  | MGAM         | XLOC_112951 | 5239  | coding | coding    | coding    | coding    |
| MSTRG. 109526. 6  | TRBV1        | XLOC_112979 | 2126  | coding | coding    | coding    | noncoding |
| MSTRG. 109526. 28 | TRBV1        | XLOC_112979 | 1734  | coding | coding    | coding    | noncoding |
| MSTRG. 109526. 37 | TRBV1        | XLOC_112979 | 1185  | coding | coding    | coding    | noncoding |
| MSTRG. 109389. 3  | CASP2        | XLOC_113007 | 2618  | coding | coding    | noncoding | noncoding |
| MSTRG. 109921. 1  |              | XLOC_113252 | 241   | coding | noncoding | noncoding | noncoding |
| MSTRG. 110082. 3  | ZNF862       | XLOC_113285 | 1565  | coding | coding    | noncoding | noncoding |
| NR_147019. 1      | ACTR3C       | XLOC_113289 | 8455  | coding | coding    | noncoding | coding    |
| MSTRG. 109950. 6  | REPIN1       | XLOC_113292 | 2847  | coding | coding    | coding    | coding    |
| MSTRG. 110024. 2  | GIMAP8       | XLOC_113306 | 3657  | coding | coding    | coding    | coding    |
| MSTRG. 110060. 1  |              | XLOC_113323 | 501   | coding | noncoding | noncoding | noncoding |
| MSTRG. 110062. 1  | GIMAP2       | XLOC_113324 | 8321  | coding | coding    | noncoding | noncoding |
| MSTRG. 109993. 13 | TMEM176A     | XLOC_113334 | 1209  | coding | coding    | coding    | noncoding |
| MSTRG. 109993. 14 | TMEM176A     | XLOC_113334 | 1331  | coding | coding    | noncoding | noncoding |
| NM_031434. 4      | TMUB1        | XLOC_113355 | 1491  | coding | coding    | coding    | coding    |
| MSTRG. 110213. 5  | SMARCD3      | XLOC_113374 | 5754  | coding | coding    | coding    | coding    |
| MSTRG. 110213. 7  | SMARCD3      | XLOC_113374 | 6470  | coding | coding    | coding    | coding    |
| MSTRG. 110244. 2  | WDR86        | XLOC_113376 | 6468  | coding | coding    | coding    | coding    |
| MSTRG. 110245. 1  | NUB1         | XLOC_113377 | 288   | coding | noncoding | noncoding | noncoding |
| XM_017012277. 2   | PRKAG2       | XLOC_113396 | 2276  | coding | coding    | coding    | coding    |
| MSTRG. 110352. 3  | ACTR3B       | XLOC_113484 | 411   | coding | coding    | coding    | noncoding |

|                   |              |             |       |        |           |           |           |
|-------------------|--------------|-------------|-------|--------|-----------|-----------|-----------|
| MSTRG. 110575. 7  | RBM33        | XLOC_113584 | 15501 | coding | noncoding | coding    | noncoding |
| MSTRG. 110637. 1  | UBE3C        | XLOC_113653 | 4764  | coding | coding    | coding    | coding    |
| MSTRG. 110651. 2  | DNAJB6       | XLOC_113656 | 2350  | coding | coding    | noncoding | noncoding |
| MSTRG. 111086. 1  | DEFA1        | XLOC_113879 | 481   | coding | coding    | noncoding | noncoding |
| MSTRG. 111413. 1  | CTSB         | XLOC_114014 | 2395  | coding | coding    | coding    | coding    |
| MSTRG. 111413. 3  | CTSB         | XLOC_114014 | 2240  | coding | coding    | coding    | coding    |
| MSTRG. 111671. 12 | ZDHHC2       | XLOC_114115 | 2415  | coding | coding    | noncoding | noncoding |
| XR_002956595. 1   | VPS37A       | XLOC_114117 | 4726  | coding | coding    | coding    | coding    |
| MSTRG. 111786. 1  |              | XLOC_114169 | 6965  | coding | noncoding | coding    | noncoding |
| MSTRG. 111985. 3  | NUDT18       | XLOC_114324 | 247   | coding | coding    | noncoding | noncoding |
| NM_021174. 6      | CCAR2        | XLOC_114363 | 5019  | coding | coding    | coding    | coding    |
| MSTRG. 112161. 6  | ENTPD4       | XLOC_114396 | 7831  | coding | coding    | coding    | noncoding |
| MSTRG. 112161. 8  | ENTPD4       | XLOC_114396 | 3052  | coding | coding    | coding    | noncoding |
| MSTRG. 112200. 1  | NKX3-1       | XLOC_114415 | 3172  | coding | coding    | noncoding | coding    |
| MSTRG. 112223. 1  |              | XLOC_114430 | 313   | coding | noncoding | coding    | noncoding |
| XM_024447269. 1   | HMBOX1       | XLOC_114722 | 15995 | coding | coding    | coding    | coding    |
| MSTRG. 112917. 2  | KIF13B       | XLOC_114745 | 4810  | coding | coding    | coding    | coding    |
| MSTRG. 112787. 3  | GSR          | XLOC_114797 | 1789  | coding | coding    | coding    | noncoding |
| NM_013962. 2      | NRG1         | XLOC_114838 | 1987  | coding | coding    | coding    | coding    |
| MSTRG. 112953. 2  | MAK16        | XLOC_114884 | 4149  | coding | coding    | coding    | coding    |
| NM_153692. 4      | HTRA4        | XLOC_115054 | 2032  | coding | coding    | coding    | coding    |
| NM_016099. 2      | GOLGA7       | XLOC_115138 | 1904  | coding | coding    | coding    | coding    |
| MSTRG. 113576. 17 | LOC105379393 | XLOC_115159 | 3139  | coding | coding    | noncoding | noncoding |
| MSTRG. 113576. 18 | LOC105379393 | XLOC_115159 | 3080  | coding | coding    | noncoding | noncoding |
| MSTRG. 113617. 2  | SLC20A2      | XLOC_115186 | 1473  | coding | coding    | coding    | coding    |
| MSTRG. 113854. 2  | PRKDC        | XLOC_115270 | 13111 | coding | coding    | noncoding | noncoding |
| MSTRG. 114001. 8  | PCMTD1       | XLOC_115385 | 3367  | coding | coding    | coding    | noncoding |
| MSTRG. 114105. 6  | TCEA1        | XLOC_115438 | 709   | coding | coding    | coding    | noncoding |
| MSTRG. 114120. 4  | LYPLA1       | XLOC_115444 | 1472  | coding | coding    | coding    | noncoding |
| MSTRG. 114295. 1  |              | XLOC_115534 | 480   | coding | noncoding | noncoding | noncoding |
| MSTRG. 115566. 7  | ASPH         | XLOC_115704 | 3277  | coding | coding    | coding    | noncoding |
| MSTRG. 115566. 11 | ASPH         | XLOC_115704 | 2811  | coding | coding    | coding    | noncoding |
| MSTRG. 114832. 11 | PDE7A        | XLOC_115843 | 5481  | coding | coding    | noncoding | noncoding |
| MSTRG. 114832. 13 | PDE7A        | XLOC_115843 | 22839 | coding | noncoding | coding    | noncoding |
| MSTRG. 114847. 1  | LOC102724687 | XLOC_115871 | 287   | coding | noncoding | noncoding | noncoding |
| MSTRG. 114920. 3  | VCPIP1       | XLOC_115904 | 7867  | coding | coding    | coding    | noncoding |
| MSTRG. 115076. 41 | CSPP1        | XLOC_115921 | 13565 | coding | coding    | coding    | noncoding |
| NM_001287258. 2   | XKR9         | XLOC_116001 | 3318  | coding | coding    | coding    | coding    |
| MSTRG. 115411. 7  | STAU2        | XLOC_116079 | 2789  | coding | coding    | coding    | noncoding |
| MSTRG. 115411. 8  | STAU2        | XLOC_116079 | 2014  | coding | coding    | coding    | noncoding |
| NM_024721. 5      | ZFHX4        | XLOC_116161 | 13987 | coding | coding    | noncoding | coding    |
| MSTRG. 115808. 2  | PEX2         | XLOC_116179 | 1849  | coding | coding    | noncoding | noncoding |

|                 |              |             |       |        |           |           |           |
|-----------------|--------------|-------------|-------|--------|-----------|-----------|-----------|
| MSTRG.115984.4  | MRPS28       | XLOC_116319 | 539   | coding | coding    | noncoding | noncoding |
| MSTRG.116182.14 | PAG1         | XLOC_116346 | 4119  | coding | coding    | coding    | noncoding |
| MSTRG.116182.15 | PAG1         | XLOC_116346 | 1602  | coding | coding    | coding    | noncoding |
| MSTRG.116273.2  | SNX16        | XLOC_116388 | 399   | coding | noncoding | noncoding | noncoding |
| MSTRG.116800.1  |              | XLOC_116594 | 320   | coding | noncoding | noncoding | noncoding |
| XM_005251092.3  | RIPK2        | XLOC_116597 | 2389  | coding | coding    | coding    | coding    |
| MSTRG.116817.1  |              | XLOC_116608 | 280   | coding | noncoding | noncoding | noncoding |
| MSTRG.117114.14 | NDUFAF6      | XLOC_116836 | 8876  | coding | coding    | noncoding | noncoding |
| MSTRG.117114.16 | NDUFAF6      | XLOC_116836 | 6035  | coding | coding    | noncoding | noncoding |
| MSTRG.117114.17 | TP53INP1     | XLOC_116836 | 5224  | coding | coding    | noncoding | noncoding |
| MSTRG.117582.1  | VPS13B       | XLOC_117030 | 3307  | coding | coding    | coding    | coding    |
| MSTRG.117388.3  | RNF19A       | XLOC_117046 | 6712  | coding | coding    | coding    | noncoding |
| MSTRG.117416.2  | PABPC1       | XLOC_117072 | 2727  | coding | coding    | coding    | noncoding |
| MSTRG.117445.6  | YWHAZ        | XLOC_117081 | 3267  | coding | coding    | noncoding | coding    |
| MSTRG.117445.7  | YWHAZ        | XLOC_117081 | 7336  | coding | coding    | coding    | coding    |
| MSTRG.117491.1  |              | XLOC_117104 | 254   | coding | coding    | noncoding | noncoding |
| MSTRG.117734.3  | NCALD        | XLOC_117105 | 4152  | coding | coding    | noncoding | coding    |
| MSTRG.117731.11 | LOC105375683 | XLOC_117114 | 4457  | coding | coding    | coding    | noncoding |
| MSTRG.117804.6  | AZIN1        | XLOC_117131 | 4201  | coding | coding    | noncoding | noncoding |
| MSTRG.117870.1  |              | XLOC_117180 | 203   | coding | noncoding | noncoding | noncoding |
| MSTRG.118996.1  | SAMD12       | XLOC_117552 | 356   | coding | noncoding | noncoding | noncoding |
| MSTRG.119104.1  | SAMD12       | XLOC_117616 | 313   | coding | coding    | noncoding | noncoding |
| MSTRG.118785.2  | TAF2         | XLOC_117667 | 4892  | coding | noncoding | noncoding | noncoding |
| MSTRG.118785.6  | TAF2         | XLOC_117667 | 1524  | coding | noncoding | noncoding | noncoding |
| MSTRG.119503.2  | LINC00861    | XLOC_117931 | 22372 | coding | noncoding | noncoding | noncoding |
| MSTRG.119845.1  | ASAP1        | XLOC_118131 | 6671  | coding | coding    | noncoding | noncoding |
| MSTRG.119845.27 | ASAP1        | XLOC_118131 | 10020 | coding | noncoding | noncoding | noncoding |
| MSTRG.119735.1  |              | XLOC_118189 | 202   | coding | noncoding | noncoding | noncoding |
| XM_005251040.4  | TG           | XLOC_118278 | 8170  | coding | coding    | coding    | coding    |
| MSTRG.119976.4  | ST3GAL1      | XLOC_118303 | 6917  | coding | coding    | coding    | coding    |
| MSTRG.120001.1  |              | XLOC_118320 | 296   | coding | noncoding | noncoding | noncoding |
| MSTRG.120945.1  | LOC105375787 | XLOC_118467 | 8144  | coding | coding    | coding    | coding    |
| MSTRG.120913.1  | LY6E-DT      | XLOC_118559 | 351   | coding | noncoding | noncoding | noncoding |
| MSTRG.121225.5  | RPL8         | XLOC_118679 | 965   | coding | coding    | coding    | coding    |
| MSTRG.121245.1  | ZNF250       | XLOC_118687 | 318   | coding | noncoding | noncoding | noncoding |
| MSTRG.110851.2  | FBXO25       | XLOC_118711 | 1442  | coding | noncoding | noncoding | noncoding |
| XM_017013119.2  | ERICH1       | XLOC_118724 | 2465  | coding | noncoding | coding    | coding    |
| MSTRG.111259.1  | MSRA         | XLOC_118949 | 237   | coding | noncoding | noncoding | noncoding |
| NM_173683.4     | XKR6         | XLOC_119041 | 4327  | coding | coding    | coding    | coding    |
| NR_073395.1     | FAM90A25P    | XLOC_119097 | 1896  | coding | coding    | coding    | coding    |
| MSTRG.111710.3  | NAT1         | XLOC_119239 | 1147  | coding | coding    | noncoding | noncoding |
| MSTRG.111803.1  | LPL          | XLOC_119305 | 476   | coding | coding    | noncoding | noncoding |

|                   |              |             |       |        |           |           |           |
|-------------------|--------------|-------------|-------|--------|-----------|-----------|-----------|
| MSTRG. 111996. 5  | DMTN         | XLOC_119357 | 2777  | coding | coding    | coding    | noncoding |
| MSTRG. 111996. 10 | DMTN         | XLOC_119357 | 2316  | coding | coding    | coding    | noncoding |
| MSTRG. 111996. 12 | DMTN         | XLOC_119357 | 2514  | coding | coding    | coding    | noncoding |
| NM_025232. 4      | REEP4        | XLOC_119363 | 1666  | coding | coding    | coding    | coding    |
| MSTRG. 112030. 3  | PDLIM2       | XLOC_119397 | 1835  | coding | coding    | coding    | coding    |
| MSTRG. 112129. 4  | TNFRSF10C    | XLOC_119427 | 2518  | coding | coding    | coding    | noncoding |
| MSTRG. 112187. 1  | SLC25A37     | XLOC_119458 | 11978 | coding | coding    | coding    | noncoding |
| MSTRG. 112187. 15 | SLC25A37     | XLOC_119458 | 4676  | coding | coding    | coding    | coding    |
| MSTRG. 112187. 20 | SLC25A37     | XLOC_119458 | 5126  | coding | coding    | coding    | noncoding |
| MSTRG. 112268. 1  | ADAM28       | XLOC_119495 | 3525  | coding | coding    | noncoding | noncoding |
| MSTRG. 112460. 11 | KCTD9        | XLOC_119520 | 21789 | coding | coding    | coding    | noncoding |
| MSTRG. 112460. 26 | DOCK5        | XLOC_119520 | 6624  | coding | coding    | coding    | noncoding |
| MSTRG. 112521. 1  | EPHX2        | XLOC_119605 | 308   | coding | noncoding | noncoding | noncoding |
| MSTRG. 112594. 1  | ESCO2        | XLOC_119623 | 626   | coding | coding    | noncoding | noncoding |
| XM_006716357. 4   | INTS9        | XLOC_119672 | 2217  | coding | coding    | coding    | coding    |
| MSTRG. 112890. 3  | HMBOX1       | XLOC_119679 | 4633  | coding | coding    | coding    | noncoding |
| MSTRG. 112890. 7  | HMBOX1       | XLOC_119679 | 2871  | coding | coding    | noncoding | noncoding |
| MSTRG. 112743. 3  | LEPROTL1     | XLOC_119732 | 4983  | coding | coding    | noncoding | noncoding |
| MSTRG. 113298. 5  | ASH2L        | XLOC_120010 | 2379  | coding | coding    | coding    | coding    |
| MSTRG. 113308. 2  | BAG4         | XLOC_120016 | 3319  | coding | coding    | noncoding | noncoding |
| NM_031940. 4      | TM2D2        | XLOC_120056 | 3628  | coding | coding    | coding    | coding    |
| MSTRG. 113513. 9  | TM2D2        | XLOC_120056 | 2766  | coding | coding    | noncoding | noncoding |
| MSTRG. 113513. 10 | ADAM9        | XLOC_120056 | 1657  | coding | coding    | noncoding | noncoding |
| MSTRG. 113522. 2  | GOLGA7       | XLOC_120115 | 2328  | coding | coding    | noncoding | noncoding |
| MSTRG. 113782. 4  | UBE2V2       | XLOC_120257 | 1148  | coding | coding    | noncoding | noncoding |
| MSTRG. 114005. 2  | LOC102724330 | XLOC_120360 | 317   | coding | noncoding | noncoding | noncoding |
| XM_011517647. 3   | RB1CC1       | XLOC_120383 | 5426  | coding | noncoding | coding    | coding    |
| MSTRG. 114229. 3  | CHCHD7       | XLOC_120502 | 2588  | coding | noncoding | coding    | noncoding |
| MSTRG. 114423. 12 | SDCBP        | XLOC_120587 | 6124  | coding | coding    | coding    | noncoding |
| NM_002603. 4      | PDE7A        | XLOC_120877 | 6443  | coding | coding    | noncoding | coding    |
| MSTRG. 114937. 2  | C8orf44-SGK3 | XLOC_120935 | 4198  | coding | coding    | noncoding | noncoding |
| MSTRG. 115078. 2  | CSPP1        | XLOC_120950 | 2573  | coding | noncoding | noncoding | noncoding |
| MSTRG. 115078. 4  | CSPP1        | XLOC_120950 | 1874  | coding | noncoding | noncoding | noncoding |
| MSTRG. 115452. 10 | ELOC         | XLOC_121286 | 1961  | coding | noncoding | noncoding | noncoding |
| MSTRG. 115456. 2  | TMEM70       | XLOC_121288 | 1207  | coding | coding    | coding    | coding    |
| XR_001745986. 1   | LOC105375624 | XLOC_121798 | 3863  | coding | noncoding | noncoding | noncoding |
| MSTRG. 116651. 4  | DECR1        | XLOC_121867 | 1742  | coding | coding    | coding    | noncoding |
| MSTRG. 116651. 5  | DECR1        | XLOC_121867 | 1714  | coding | coding    | noncoding | noncoding |
| MSTRG. 116651. 14 | DECR1        | XLOC_121867 | 6721  | coding | coding    | coding    | noncoding |
| XM_011517152. 3   | PIP4P2       | XLOC_121905 | 921   | coding | coding    | noncoding | coding    |
| MSTRG. 116870. 3  | OTUD6B       | XLOC_121922 | 2278  | coding | coding    | noncoding | noncoding |
| MSTRG. 116970. 1  | TMEM67       | XLOC_122008 | 360   | coding | coding    | noncoding | noncoding |

|                   |              |             |      |        |           |           |           |
|-------------------|--------------|-------------|------|--------|-----------|-----------|-----------|
| MSTRG. 117060. 1  | LOC101926977 | XLOC_122049 | 952  | coding | noncoding | noncoding | noncoding |
| MSTRG. 117107. 2  | CCNE2        | XLOC_122063 | 6961 | coding | coding    | noncoding | coding    |
| MSTRG. 117603. 32 | CPQ          | XLOC_122184 | 2254 | coding | noncoding | noncoding | noncoding |
| MSTRG. 117579. 15 | VPS13B-DT    | XLOC_122280 | 3829 | coding | coding    | coding    | noncoding |
| MSTRG. 117586. 1  | VPS13B       | XLOC_122285 | 2496 | coding | coding    | noncoding | coding    |
| XM_017013302. 1   | RNF19A       | XLOC_122316 | 4209 | coding | coding    | coding    | coding    |
| MSTRG. 118151. 3  | OXR1         | XLOC_122648 | 2826 | coding | coding    | coding    | coding    |
| MSTRG. 118195. 2  | EMC2         | XLOC_122714 | 1115 | coding | coding    | noncoding | noncoding |
| MSTRG. 119146. 1  | SNTB1        | XLOC_123191 | 236  | coding | noncoding | noncoding | noncoding |
| MSTRG. 119165. 9  | TBC1D31      | XLOC_123272 | 3766 | coding | coding    | noncoding | noncoding |
| MSTRG. 119165. 10 | TBC1D31      | XLOC_123272 | 3417 | coding | coding    | noncoding | noncoding |
| MSTRG. 120510. 1  | LOC105375751 | XLOC_123570 | 1010 | coding | noncoding | noncoding | noncoding |
| MSTRG. 120520. 1  | LOC105375751 | XLOC_123576 | 2152 | coding | noncoding | noncoding | noncoding |
| MSTRG. 120536. 1  | PCAT2        | XLOC_123590 | 1221 | coding | noncoding | noncoding | noncoding |
| MSTRG. 120538. 1  | PCAT2        | XLOC_123591 | 265  | coding | noncoding | noncoding | noncoding |
| MSTRG. 120574. 1  | LOC105375752 | XLOC_123622 | 240  | coding | noncoding | noncoding | noncoding |
| MSTRG. 119783. 2  | EFR3A        | XLOC_123857 | 2389 | coding | noncoding | noncoding | coding    |
| XM_017013894. 2   | TRAPPC9      | XLOC_124160 | 5426 | coding | coding    | coding    | coding    |
| MSTRG. 120946. 17 | SLC45A4      | XLOC_124233 | 912  | coding | noncoding | coding    | noncoding |
| MSTRG. 120918. 2  | LY6E         | XLOC_124314 | 1160 | coding | coding    | coding    | noncoding |
| MSTRG. 120929. 1  | LOC107986906 | XLOC_124321 | 650  | coding | coding    | noncoding | noncoding |
| MSTRG. 121031. 3  | ZNF623       | XLOC_124370 | 3939 | coding | coding    | noncoding | noncoding |
| XM_017013382. 1   | NRBP2        | XLOC_124380 | 2292 | coding | coding    | coding    | coding    |
| MSTRG. 121095. 3  | GRINA        | XLOC_124391 | 1461 | coding | coding    | coding    | coding    |
| NM_000973. 5      | RPL8         | XLOC_124461 | 845  | coding | coding    | coding    | coding    |
| MSTRG. 121195. 1  |              | XLOC_124464 | 272  | coding | noncoding | noncoding | noncoding |
| MSTRG. 121253. 1  |              | XLOC_124482 | 215  | coding | noncoding | noncoding | noncoding |
| XM_011518045. 3   | DOCK8        | XLOC_124507 | 7213 | coding | coding    | coding    | coding    |
| MSTRG. 121403. 1  |              | XLOC_124614 | 437  | coding | noncoding | noncoding | noncoding |
| MSTRG. 121831. 5  | RFX3         | XLOC_124642 | 2298 | coding | coding    | noncoding | noncoding |
| MSTRG. 121686. 3  | AK3          | XLOC_124761 | 2133 | coding | coding    | noncoding | noncoding |
| NM_004972. 3      | JAK2         | XLOC_124780 | 5285 | coding | coding    | coding    | coding    |
| NM_001135920. 3   | RIC1         | XLOC_124856 | 4045 | coding | coding    | coding    | coding    |
| XM_024447459. 1   | KDM4C        | XLOC_124915 | 6575 | coding | coding    | coding    | coding    |
| MSTRG. 122217. 1  |              | XLOC_125109 | 248  | coding | noncoding | noncoding | noncoding |
| MSTRG. 122606. 2  | HAUS6        | XLOC_125250 | 3093 | coding | coding    | coding    | coding    |
| MSTRG. 122771. 1  | MIR31HG      | XLOC_125318 | 369  | coding | coding    | noncoding | noncoding |
| MSTRG. 123120. 17 | C9orf72      | XLOC_125462 | 3219 | coding | coding    | noncoding | noncoding |
| MSTRG. 124172. 1  | LINGO2       | XLOC_125568 | 242  | coding | noncoding | noncoding | noncoding |
| MSTRG. 124334. 1  | LINGO2       | XLOC_125708 | 903  | coding | noncoding | noncoding | noncoding |
| MSTRG. 124365. 1  | LINGO2       | XLOC_125738 | 443  | coding | noncoding | noncoding | noncoding |
| MSTRG. 123336. 3  | APTX         | XLOC_125859 | 2077 | coding | coding    | coding    | noncoding |

|                   |              |             |       |        |           |           |           |
|-------------------|--------------|-------------|-------|--------|-----------|-----------|-----------|
| MSTRG. 123336. 5  | APTX         | XLOC_125859 | 1871  | coding | coding    | coding    | noncoding |
| MSTRG. 123360. 2  | SMU1         | XLOC_125878 | 4225  | coding | coding    | coding    | noncoding |
| MSTRG. 123462. 2  | UBAP2        | XLOC_125934 | 4314  | coding | coding    | coding    | noncoding |
| MSTRG. 123401. 1  | KIF24        | XLOC_125944 | 551   | coding | noncoding | noncoding | noncoding |
| MSTRG. 123468. 2  | DCTN3        | XLOC_125967 | 915   | coding | coding    | noncoding | noncoding |
| MSTRG. 123576. 2  | FAM214B      | XLOC_126007 | 3089  | coding | coding    | coding    | coding    |
| MSTRG. 123576. 9  | FAM214B      | XLOC_126007 | 2959  | coding | coding    | coding    | coding    |
| MSTRG. 123621. 2  | SIT1         | XLOC_126036 | 798   | coding | noncoding | noncoding | noncoding |
| NM_022343. 4      | GLIPR2       | XLOC_126077 | 1895  | coding | coding    | coding    | coding    |
| MSTRG. 124467. 1  |              | XLOC_126299 | 2812  | coding | noncoding | noncoding | noncoding |
| MSTRG. 124553. 4  | CBWD6        | XLOC_126358 | 1244  | coding | coding    | noncoding | noncoding |
| MSTRG. 124568. 1  |              | XLOC_126359 | 15451 | coding | coding    | noncoding | noncoding |
| XM_011518783. 3   | PGM5         | XLOC_126656 | 3764  | coding | coding    | coding    | coding    |
| MSTRG. 125264. 4  | PTAR1        | XLOC_126739 | 10136 | coding | coding    | noncoding | noncoding |
| MSTRG. 125402. 6  | CEMIP2       | XLOC_126811 | 3465  | coding | noncoding | noncoding | coding    |
| MSTRG. 125491. 3  | ZFAND5       | XLOC_126853 | 2398  | coding | coding    | coding    | noncoding |
| MSTRG. 125715. 1  | NMRK1        | XLOC_126925 | 2398  | coding | coding    | noncoding | noncoding |
| MSTRG. 126059. 15 | GNAQ         | XLOC_127048 | 6194  | coding | coding    | coding    | noncoding |
| MSTRG. 126059. 24 | GNAQ         | XLOC_127048 | 1560  | coding | noncoding | noncoding | noncoding |
| MSTRG. 126583. 1  | FRMD3        | XLOC_127276 | 521   | coding | coding    | noncoding | noncoding |
| XM_017014722. 1   | IDNK         | XLOC_127292 | 1138  | coding | noncoding | noncoding | coding    |
| MSTRG. 126496. 25 | LOC105376335 | XLOC_127298 | 2411  | coding | coding    | coding    | noncoding |
| MSTRG. 126504. 3  | RMI1         | XLOC_127301 | 5175  | coding | coding    | coding    | noncoding |
| MSTRG. 126638. 5  | AGTPBP1      | XLOC_127332 | 4104  | coding | coding    | coding    | noncoding |
| MSTRG. 126766. 16 | TUT7         | XLOC_127354 | 7335  | coding | coding    | coding    | noncoding |
| XM_005251757. 4   | DAPK1        | XLOC_127394 | 3236  | coding | coding    | coding    | coding    |
| MSTRG. 126789. 3  | LOC497256    | XLOC_127419 | 468   | coding | noncoding | noncoding | noncoding |
| MSTRG. 127045. 34 | SECISBP2     | XLOC_127471 | 8291  | coding | coding    | coding    | coding    |
| MSTRG. 127120. 1  | LOC100507103 | XLOC_127567 | 219   | coding | noncoding | noncoding | noncoding |
| MSTRG. 127176. 3  | NOL8         | XLOC_127613 | 4058  | coding | coding    | noncoding | noncoding |
| MSTRG. 127399. 2  | FAM120AOS    | XLOC_127672 | 3556  | coding | noncoding | coding    | coding    |
| MSTRG. 127418. 1  | FAM120A      | XLOC_127691 | 372   | coding | noncoding | noncoding | noncoding |
| MSTRG. 127650. 7  | ZNF782       | XLOC_127861 | 2440  | coding | coding    | coding    | noncoding |
| MSTRG. 127657. 1  |              | XLOC_127866 | 1011  | coding | noncoding | noncoding | noncoding |
| MSTRG. 127682. 4  | MFSD14C      | XLOC_127878 | 1528  | coding | noncoding | coding    | noncoding |
| NM_001166116. 1   | TMOD1        | XLOC_127917 | 3261  | coding | coding    | coding    | coding    |
| NM_001351507. 1   | NCBP1        | XLOC_127918 | 5317  | coding | coding    | coding    | coding    |
| MSTRG. 127841. 8  | NCBP1        | XLOC_127918 | 1711  | coding | coding    | coding    | coding    |
| MSTRG. 127820. 3  | TRMO         | XLOC_127947 | 290   | coding | noncoding | noncoding | noncoding |
| MSTRG. 128198. 1  |              | XLOC_128178 | 233   | coding | noncoding | noncoding | noncoding |
| MSTRG. 128745. 2  | ELP1         | XLOC_128418 | 5051  | coding | coding    | coding    | coding    |
| MSTRG. 128895. 3  | ECPAS        | XLOC_128505 | 8513  | coding | coding    | coding    | noncoding |

|                 |              |             |       |        |           |           |           |
|-----------------|--------------|-------------|-------|--------|-----------|-----------|-----------|
| MSTRG.129007.3  | SUSD1        | XLOC_128571 | 3389  | coding | coding    | coding    | noncoding |
| MSTRG.129014.4  | PTBP3        | XLOC_128573 | 1349  | coding | coding    | coding    | noncoding |
| MSTRG.129014.9  | PTBP3        | XLOC_128573 | 10222 | coding | coding    | noncoding | noncoding |
| MSTRG.129697.3  | CDK5RAP2     | XLOC_128925 | 4886  | coding | noncoding | noncoding | coding    |
| MSTRG.129697.4  | CDK5RAP2     | XLOC_128925 | 6043  | coding | coding    | noncoding | coding    |
| MSTRG.129693.2  | MEGF9        | XLOC_128928 | 6894  | coding | coding    | coding    | coding    |
| XM_005251679.4  | CNTRL        | XLOC_128959 | 7782  | coding | coding    | coding    | coding    |
| MSTRG.129981.1  | CNTRL        | XLOC_128959 | 12547 | coding | coding    | coding    | coding    |
| MSTRG.130139.3  | LOC112268055 | XLOC_129186 | 3201  | coding | coding    | noncoding | noncoding |
| MSTRG.130500.3  | ST6GALNAC6   | XLOC_129344 | 4218  | coding | coding    | coding    | coding    |
| MSTRG.130742.10 | TOR1B        | XLOC_129473 | 5298  | coding | coding    | coding    | coding    |
| MSTRG.130808.1  | FNBP1        | XLOC_129479 | 6351  | coding | coding    | coding    | noncoding |
| MSTRG.131039.1  |              | XLOC_129643 | 825   | coding | noncoding | noncoding | noncoding |
| MSTRG.131374.3  | ENTR1        | XLOC_129806 | 969   | coding | noncoding | coding    | coding    |
| MSTRG.121442.6  | DOCK8-AS1    | XLOC_129952 | 15418 | coding | coding    | coding    | coding    |
| MSTRG.121466.1  | KANK1        | XLOC_129967 | 276   | coding | noncoding | noncoding | noncoding |
| MSTRG.121750.1  | INSL6        | XLOC_130141 | 374   | coding | noncoding | noncoding | noncoding |
| MSTRG.121938.2  | RIC1         | XLOC_130159 | 5466  | coding | coding    | noncoding | noncoding |
| XR_001746382.2  | ERMP1        | XLOC_130159 | 5188  | coding | coding    | coding    | coding    |
| MSTRG.121818.8  | UHRF2        | XLOC_130189 | 634   | coding | coding    | noncoding | noncoding |
| MSTRG.122081.3  | KDM4C        | XLOC_130204 | 4709  | coding | coding    | coding    | coding    |
| MSTRG.122618.4  | DENND4C      | XLOC_130533 | 8412  | coding | coding    | coding    | noncoding |
| MSTRG.122610.3  | ACER2        | XLOC_130534 | 1982  | coding | coding    | noncoding | noncoding |
| MSTRG.122610.4  | ACER2        | XLOC_130534 | 1825  | coding | noncoding | noncoding | noncoding |
| NM_002176.4     | IFNB1        | XLOC_130611 | 839   | coding | coding    | coding    | coding    |
| MSTRG.122790.2  | MTAP         | XLOC_130656 | 2549  | coding | coding    | coding    | noncoding |
| NM_001363763.2  | CDKN2A       | XLOC_130669 | 1302  | coding | noncoding | coding    | coding    |
| MSTRG.123319.6  | LOC105376018 | XLOC_131011 | 2869  | coding | coding    | noncoding | noncoding |
| MSTRG.123853.12 | ZCCHC7       | XLOC_131254 | 2579  | coding | noncoding | coding    | noncoding |
| NR_126046.1     | GLIDR        | XLOC_131365 | 1038  | coding | noncoding | noncoding | noncoding |
| MSTRG.124533.5  | PGM5P2       | XLOC_131401 | 1650  | coding | noncoding | coding    | noncoding |
| MSTRG.124498.1  |              | XLOC_131428 | 1062  | coding | noncoding | noncoding | noncoding |
| MSTRG.124500.1  |              | XLOC_131429 | 1234  | coding | noncoding | noncoding | noncoding |
| MSTRG.124618.1  |              | XLOC_131478 | 2564  | coding | coding    | noncoding | noncoding |
| MSTRG.124780.1  |              | XLOC_131544 | 411   | coding | noncoding | noncoding | noncoding |
| MSTRG.124839.1  |              | XLOC_131573 | 358   | coding | coding    | noncoding | noncoding |
| MSTRG.124840.8  | LINC01410    | XLOC_131574 | 4980  | coding | noncoding | noncoding | noncoding |
| MSTRG.124886.3  | LINC00537    | XLOC_131612 | 1401  | coding | noncoding | noncoding | noncoding |
| MSTRG.125033.6  | LOC105379251 | XLOC_131658 | 4193  | coding | noncoding | noncoding | noncoding |
| MSTRG.125033.11 | CBWD5        | XLOC_131658 | 1344  | coding | noncoding | noncoding | noncoding |
| MSTRG.125033.14 | CBWD5        | XLOC_131658 | 1203  | coding | coding    | noncoding | noncoding |
| MSTRG.124986.1  |              | XLOC_131694 | 295   | coding | noncoding | noncoding | noncoding |

|                   |                             |             |       |        |           |           |           |
|-------------------|-----------------------------|-------------|-------|--------|-----------|-----------|-----------|
| MSTRG. 125093. 2  | CBWD3                       | XLOC_131732 | 5801  | coding | coding    | noncoding | noncoding |
| MSTRG. 125093. 7  | CBWD3                       | XLOC_131732 | 1594  | coding | coding    | noncoding | noncoding |
| MSTRG. 125093. 11 | CBWD3                       | XLOC_131732 | 1450  | coding | coding    | noncoding | noncoding |
| MSTRG. 125093. 12 | CBWD3                       | XLOC_131732 | 868   | coding | coding    | noncoding | noncoding |
| MSTRG. 125093. 13 | CBWD3                       | XLOC_131732 | 784   | coding | coding    | noncoding | noncoding |
| MSTRG. 125318. 8  | SMC5                        | XLOC_131828 | 3024  | coding | noncoding | noncoding | noncoding |
| NM_001102421. 3   | ZFAND5                      | XLOC_131920 | 5704  | coding | coding    | coding    | coding    |
| MSTRG. 125674. 1  |                             | XLOC_132056 | 205   | coding | noncoding | noncoding | noncoding |
| MSTRG. 125681. 1  |                             | XLOC_132062 | 251   | coding | noncoding | noncoding | noncoding |
| MSTRG. 125923. 5  | CEP78                       | XLOC_132256 | 3356  | coding | coding    | coding    | noncoding |
| MSTRG. 126216. 9  | TLE4                        | XLOC_132358 | 5717  | coding | coding    | coding    | noncoding |
| MSTRG. 126430. 1  |                             | XLOC_132377 | 341   | coding | noncoding | noncoding | noncoding |
| MSTRG. 126669. 1  | NAA35                       | XLOC_132623 | 408   | coding | coding    | noncoding | noncoding |
| XM_011519011. 2   | TUT7                        | XLOC_132636 | 8220  | coding | coding    | coding    | coding    |
| MSTRG. 127044. 3  | SECISBP2                    | XLOC_132745 | 3323  | coding | coding    | noncoding | coding    |
| MSTRG. 127044. 6  | SEMA4D                      | XLOC_132745 | 4558  | coding | coding    | noncoding | noncoding |
| MSTRG. 126969. 10 | SYK                         | XLOC_132796 | 12242 | coding | noncoding | coding    | noncoding |
| XM_011519073. 2   | ZNF484                      | XLOC_132932 | 4220  | coding | coding    | coding    | coding    |
| NM_004148. 4      | NINJ1                       | XLOC_132949 | 1237  | coding | coding    | coding    | coding    |
| MSTRG. 127398. 16 | FAM120AOS                   | XLOC_132960 | 4433  | coding | noncoding | coding    | noncoding |
| MSTRG. 127309. 1  | PTPDC1                      | XLOC_132976 | 1052  | coding | noncoding | noncoding | noncoding |
| MSTRG. 127310. 1  | PTPDC1                      | XLOC_132977 | 700   | coding | noncoding | noncoding | noncoding |
| MSTRG. 127301. 1  |                             | XLOC_132995 | 271   | coding | noncoding | noncoding | noncoding |
| MSTRG. 127357. 1  |                             | XLOC_133008 | 409   | coding | noncoding | noncoding | noncoding |
| MSTRG. 127627. 1  | SUGT1P4-STRA6LP-<br>CCDC180 | XLOC_133193 | 520   | coding | noncoding | noncoding | noncoding |
| MSTRG. 127842. 3  | NCBP1                       | XLOC_133219 | 2906  | coding | coding    | coding    | noncoding |
| XM_005252086. 1   | HEMGN                       | XLOC_133235 | 2213  | coding | noncoding | coding    | coding    |
| MSTRG. 127924. 5  | TGFBR1                      | XLOC_133270 | 26724 | coding | coding    | coding    | noncoding |
| MSTRG. 128203. 2  | STX17                       | XLOC_133304 | 1455  | coding | noncoding | noncoding | noncoding |
| NM_015051. 3      | ERP44                       | XLOC_133304 | 4808  | coding | coding    | coding    | coding    |
| MSTRG. 128293. 2  | FSD1L                       | XLOC_133466 | 997   | coding | noncoding | noncoding | noncoding |
| MSTRG. 129067. 2  | C9orf147                    | XLOC_133829 | 3515  | coding | coding    | noncoding | noncoding |
| MSTRG. 129067. 9  | C9orf147                    | XLOC_133829 | 1684  | coding | noncoding | coding    | noncoding |
| MSTRG. 129096. 1  | KIAA1958                    | XLOC_133836 | 238   | coding | noncoding | noncoding | noncoding |
| MSTRG. 129036. 2  | SNX30                       | XLOC_133846 | 7376  | coding | coding    | coding    | noncoding |
| MSTRG. 129036. 3  | SNX30                       | XLOC_133846 | 3656  | coding | noncoding | coding    | noncoding |
| MSTRG. 129124. 5  | FKBP15                      | XLOC_133860 | 8538  | coding | coding    | coding    | coding    |
| MSTRG. 129153. 7  | RGS3                        | XLOC_133875 | 2379  | coding | coding    | coding    | coding    |
| MSTRG. 129153. 10 | RGS3                        | XLOC_133875 | 2447  | coding | coding    | coding    | coding    |
| MSTRG. 129256. 1  |                             | XLOC_133947 | 210   | coding | noncoding | noncoding | noncoding |
| MSTRG. 129602. 2  | TRIM32                      | XLOC_134047 | 2294  | coding | coding    | coding    | noncoding |

|                 |              |             |      |        |           |           |           |
|-----------------|--------------|-------------|------|--------|-----------|-----------|-----------|
| MSTRG.129974.9  | C5           | XLOC_134181 | 7984 | coding | coding    | coding    | coding    |
| MSTRG.129974.11 | C5           | XLOC_134181 | 994  | coding | noncoding | noncoding | noncoding |
| MSTRG.129918.1  | RABGAP1      | XLOC_134270 | 226  | coding | noncoding | noncoding | noncoding |
| MSTRG.130219.1  | DENND1A      | XLOC_134306 | 325  | coding | noncoding | noncoding | noncoding |
| MSTRG.130132.13 | GAPVD1       | XLOC_134419 | 3099 | coding | coding    | noncoding | coding    |
| MSTRG.130281.3  | PBX3         | XLOC_134452 | 2044 | coding | coding    | noncoding | noncoding |
| MSTRG.130334.1  | ZBTB34       | XLOC_134497 | 6469 | coding | coding    | coding    | coding    |
| MSTRG.130334.4  | ZBTB34       | XLOC_134497 | 6880 | coding | coding    | noncoding | coding    |
| MSTRG.130532.4  | LCN2         | XLOC_134587 | 813  | coding | coding    | noncoding | noncoding |
| MSTRG.130669.3  | LOC101929331 | XLOC_134651 | 2041 | coding | noncoding | coding    | noncoding |
| MSTRG.130719.2  | LINC00963    | XLOC_134673 | 1586 | coding | noncoding | coding    | noncoding |
| MSTRG.130719.5  | LINC00963    | XLOC_134673 | 2454 | coding | noncoding | coding    | noncoding |
| XM_017014492.2  | FNBP1        | XLOC_134693 | 2988 | coding | coding    | coding    | coding    |
| XM_017015413.2  | LOC100996574 | XLOC_134840 | 764  | coding | noncoding | coding    | coding    |
| MSTRG.131097.2  | RPL7A        | XLOC_134854 | 1123 | coding | coding    | coding    | noncoding |
| MSTRG.131612.3  | EHMT1        | XLOC_135124 | 3647 | coding | coding    | coding    | coding    |
| MSTRG.131598.10 | FAM157B      | XLOC_135141 | 1103 | coding | noncoding | noncoding | noncoding |
| MSTRG.131895.1  | KLF6         | XLOC_135296 | 9378 | coding | noncoding | coding    | coding    |
| MSTRG.132073.1  |              | XLOC_135389 | 212  | coding | noncoding | noncoding | noncoding |
| MSTRG.132177.1  | LOC105376387 | XLOC_135511 | 290  | coding | noncoding | noncoding | noncoding |
| MSTRG.132378.1  |              | XLOC_135639 | 289  | coding | noncoding | noncoding | noncoding |
| MSTRG.132389.1  |              | XLOC_135648 | 373  | coding | noncoding | noncoding | noncoding |
| MSTRG.132447.1  |              | XLOC_135683 | 1317 | coding | noncoding | noncoding | noncoding |
| XM_017015562.1  | CELF2        | XLOC_135717 | 9301 | coding | coding    | coding    | coding    |
| XM_011519297.1  | CELF2        | XLOC_135717 | 9384 | coding | coding    | coding    | coding    |
| NM_001326348.1  | CELF2        | XLOC_135717 | 2955 | coding | coding    | coding    | coding    |
| MSTRG.132616.5  | UPF2         | XLOC_135795 | 4939 | coding | coding    | noncoding | noncoding |
| MSTRG.132616.6  | UPF2         | XLOC_135795 | 963  | coding | coding    | coding    | noncoding |
| MSTRG.132616.9  | UPF2         | XLOC_135795 | 2329 | coding | noncoding | noncoding | noncoding |
| MSTRG.132634.5  | SEC61A2      | XLOC_135800 | 6000 | coding | coding    | coding    | coding    |
| MSTRG.132832.9  | FAM107B      | XLOC_135964 | 4093 | coding | coding    | noncoding | noncoding |
| XM_006717503.3  | SUV39H2      | XLOC_135977 | 2617 | coding | coding    | coding    | coding    |
| MSTRG.133069.1  |              | XLOC_136006 | 491  | coding | noncoding | noncoding | noncoding |
| MSTRG.133070.2  | MINDY3       | XLOC_136007 | 1918 | coding | noncoding | coding    | noncoding |
| MSTRG.133171.2  | TRDMT1       | XLOC_136057 | 981  | coding | noncoding | noncoding | noncoding |
| MSTRG.133171.8  | VIM          | XLOC_136057 | 1908 | coding | coding    | coding    | noncoding |
| MSTRG.133366.3  | NSUN6        | XLOC_136140 | 1438 | coding | coding    | noncoding | noncoding |
| MSTRG.133573.2  | PIP4K2A      | XLOC_136306 | 5273 | coding | coding    | coding    | noncoding |
| MSTRG.133573.4  | PIP4K2A      | XLOC_136306 | 4754 | coding | coding    | coding    | noncoding |
| MSTRG.133708.3  | ARHGAP21     | XLOC_136370 | 4813 | coding | coding    | noncoding | noncoding |
| MSTRG.133824.19 | ABI1         | XLOC_136418 | 3146 | coding | coding    | noncoding | noncoding |
| MSTRG.133824.21 | ABI1         | XLOC_136418 | 1932 | coding | coding    | noncoding | noncoding |

|                   |              |             |       |        |           |           |           |
|-------------------|--------------|-------------|-------|--------|-----------|-----------|-----------|
| MSTRG. 134074. 1  |              | XLOC_136517 | 290   | coding | noncoding | noncoding | noncoding |
| MSTRG. 134248. 6  | ZNF438       | XLOC_136622 | 2899  | coding | noncoding | coding    | noncoding |
| MSTRG. 134248. 12 | ZNF438       | XLOC_136622 | 9468  | coding | noncoding | noncoding | noncoding |
| MSTRG. 134380. 1  | LOC102031319 | XLOC_136686 | 6783  | coding | coding    | coding    | noncoding |
| MSTRG. 134380. 10 | LOC102031319 | XLOC_136686 | 16306 | coding | noncoding | coding    | noncoding |
| MSTRG. 134793. 3  | ITGB1        | XLOC_136709 | 8650  | coding | coding    | noncoding | noncoding |
| MSTRG. 134564. 6  |              | XLOC_136872 | 1646  | coding | coding    | noncoding | noncoding |
| MSTRG. 134669. 1  | ZNF248       | XLOC_136901 | 243   | coding | coding    | coding    | noncoding |
| MSTRG. 134698. 3  | ZNF25        | XLOC_136925 | 2610  | coding | coding    | noncoding | noncoding |
| MSTRG. 134698. 4  | ZNF25        | XLOC_136925 | 2820  | coding | coding    | noncoding | noncoding |
| NM_001278175. 2   | ZNF33A       | XLOC_136928 | 6180  | coding | coding    | coding    | coding    |
| MSTRG. 135053. 1  | ZNF239       | XLOC_137058 | 866   | coding | noncoding | noncoding | noncoding |
| MSTRG. 135501. 1  |              | XLOC_137157 | 9341  | coding | noncoding | noncoding | noncoding |
| MSTRG. 135362. 1  | FAM170B-AS1  | XLOC_137329 | 412   | coding | noncoding | noncoding | noncoding |
| MSTRG. 135349. 1  |              | XLOC_137344 | 249   | coding | noncoding | noncoding | noncoding |
| MSTRG. 135903. 1  |              | XLOC_137549 | 329   | coding | noncoding | noncoding | noncoding |
| MSTRG. 136390. 3  | ANK3         | XLOC_137616 | 4346  | coding | coding    | coding    | noncoding |
| MSTRG. 136391. 1  | ANK3         | XLOC_137617 | 1468  | coding | noncoding | noncoding | noncoding |
| MSTRG. 136193. 1  | RTKN2        | XLOC_137711 | 234   | coding | coding    | noncoding | noncoding |
| MSTRG. 136256. 1  | EGR2         | XLOC_137734 | 304   | coding | noncoding | noncoding | noncoding |
| MSTRG. 136634. 3  | JMJD1C       | XLOC_137743 | 9803  | coding | coding    | coding    | coding    |
| MSTRG. 136566. 3  | HERC4        | XLOC_137851 | 3405  | coding | coding    | noncoding | noncoding |
| MSTRG. 136566. 8  | HERC4        | XLOC_137851 | 389   | coding | coding    | noncoding | noncoding |
| NM_004728. 4      | DDX21        | XLOC_137886 | 4664  | coding | coding    | coding    | coding    |
| MSTRG. 136806. 2  | TYSND1       | XLOC_137955 | 966   | coding | coding    | coding    | noncoding |
| MSTRG. 137105. 6  | P4HA1        | XLOC_138073 | 627   | coding | noncoding | noncoding | noncoding |
| XM_011539740. 2   | FAM149B1     | XLOC_138073 | 1447  | coding | coding    | noncoding | coding    |
| MSTRG. 137056. 2  | ANXA7        | XLOC_138087 | 2299  | coding | coding    | noncoding | noncoding |
| MSTRG. 137160. 4  | BMS1P4-AGAP5 | XLOC_138105 | 1978  | coding | coding    | coding    | coding    |
| MSTRG. 137248. 6  | AP3M1        | XLOC_138120 | 467   | coding | noncoding | noncoding | noncoding |
| MSTRG. 137337. 1  | DLG5         | XLOC_138304 | 244   | coding | noncoding | noncoding | noncoding |
| MSTRG. 137392. 2  | POLR3A       | XLOC_138308 | 4652  | coding | coding    | coding    | coding    |
| MSTRG. 137569. 5  | LOC642361    | XLOC_138391 | 2254  | coding | noncoding | coding    | noncoding |
| MSTRG. 137569. 9  | LOC642361    | XLOC_138391 | 410   | coding | noncoding | noncoding | noncoding |
| XM_011540192. 3   | TMEM254      | XLOC_138414 | 955   | coding | coding    | noncoding | coding    |
| MSTRG. 137986. 1  |              | XLOC_138626 | 849   | coding | noncoding | coding    | noncoding |
| MSTRG. 137952. 6  | ATAD1        | XLOC_138646 | 1210  | coding | coding    | noncoding | noncoding |
| NM_001304718. 2   | PTEN         | XLOC_138651 | 8629  | coding | coding    | coding    | coding    |
| MSTRG. 138125. 4  | LOC105378415 | XLOC_138666 | 20022 | coding | noncoding | coding    | noncoding |
| MSTRG. 138125. 7  | LOC105378415 | XLOC_138666 | 18478 | coding | noncoding | coding    | noncoding |
| MSTRG. 138125. 9  | LOC105378415 | XLOC_138666 | 15074 | coding | noncoding | coding    | noncoding |
| MSTRG. 138125. 20 | LOC105378415 | XLOC_138666 | 12611 | coding | noncoding | coding    | noncoding |

|                 |              |             |       |        |           |           |           |
|-----------------|--------------|-------------|-------|--------|-----------|-----------|-----------|
| XM_024447826.1  | LIPJ         | XLOC_138750 | 3402  | coding | coding    | noncoding | coding    |
| NM_001198829.2  | LIPF         | XLOC_138751 | 1472  | coding | coding    | coding    | coding    |
| NR_135314.2     | FAS          | XLOC_138780 | 3783  | coding | coding    | coding    | noncoding |
| NM_001270929.2  | IFIT1        | XLOC_138831 | 4411  | coding | coding    | coding    | coding    |
| MSTRG.138423.1  | FLJ37201     | XLOC_138851 | 1041  | coding | coding    | noncoding | noncoding |
| NM_001257101.1  | PCGF5        | XLOC_138909 | 7039  | coding | coding    | noncoding | coding    |
| XM_017016880.2  | BTAF1        | XLOC_138970 | 8003  | coding | coding    | coding    | coding    |
| MSTRG.138913.1  |              | XLOC_139101 | 380   | coding | noncoding | noncoding | noncoding |
| MSTRG.139178.1  | ENTPD1-AS1   | XLOC_139187 | 949   | coding | noncoding | noncoding | noncoding |
| XR_002956980.1  | CC2D2B       | XLOC_139189 | 3059  | coding | coding    | coding    | coding    |
| MSTRG.139246.1  | ENTPD1-AS1   | XLOC_139222 | 322   | coding | noncoding | noncoding | noncoding |
| MSTRG.139045.2  |              | XLOC_139295 | 3326  | coding | noncoding | noncoding | noncoding |
| MSTRG.139311.3  | RRP12        | XLOC_139297 | 773   | coding | noncoding | coding    | noncoding |
| MSTRG.139423.5  | HPS1         | XLOC_139363 | 2557  | coding | noncoding | coding    | noncoding |
| MSTRG.139558.1  | SEMA4G       | XLOC_139455 | 3500  | coding | coding    | coding    | coding    |
| MSTRG.139619.6  | POLL         | XLOC_139489 | 2698  | coding | coding    | coding    | coding    |
| MSTRG.139674.4  | OGA          | XLOC_139498 | 6043  | coding | coding    | coding    | noncoding |
| MSTRG.139674.12 | OGA          | XLOC_139498 | 8428  | coding | coding    | coding    | noncoding |
| MSTRG.139653.2  | PPRC1        | XLOC_139514 | 3319  | coding | coding    | coding    | coding    |
| XM_011539864.3  | SUFU         | XLOC_139539 | 1883  | coding | coding    | coding    | coding    |
| MSTRG.139911.24 | CNNM2        | XLOC_139570 | 3448  | coding | coding    | noncoding | noncoding |
| MSTRG.139911.23 | CNNM2        | XLOC_139570 | 4054  | coding | coding    | noncoding | noncoding |
| MSTRG.139911.29 | CNNM2        | XLOC_139570 | 5520  | coding | coding    | coding    | noncoding |
| MSTRG.139911.39 | NT5C2        | XLOC_139570 | 459   | coding | noncoding | noncoding | noncoding |
| MSTRG.139826.5  | CALHM2       | XLOC_139585 | 1866  | coding | coding    | coding    | coding    |
| NM_001304743.2  | SLK          | XLOC_139622 | 7734  | coding | coding    | coding    | coding    |
| XM_011539273.2  | GSTO2        | XLOC_139637 | 6504  | coding | coding    | coding    | coding    |
| MSTRG.140029.17 | ITPRIP       | XLOC_139637 | 10307 | coding | coding    | coding    | noncoding |
| MSTRG.140622.9  | ZDHC6        | XLOC_139874 | 2879  | coding | noncoding | noncoding | noncoding |
| MSTRG.140596.3  | CCDC186      | XLOC_140014 | 3765  | coding | noncoding | noncoding | noncoding |
| MSTRG.140596.4  | CCDC186      | XLOC_140014 | 4613  | coding | noncoding | noncoding | noncoding |
| MSTRG.140814.6  | ABLIM1       | XLOC_140029 | 5612  | coding | coding    | noncoding | noncoding |
| MSTRG.140814.4  | ABLIM1       | XLOC_140029 | 7355  | coding | coding    | coding    | coding    |
| MSTRG.140814.8  | ABLIM1       | XLOC_140029 | 8790  | coding | coding    | noncoding | noncoding |
| MSTRG.141251.2  | ATE1         | XLOC_140279 | 4573  | coding | coding    | coding    | noncoding |
| MSTRG.141388.15 | CHST15       | XLOC_140375 | 6567  | coding | coding    | coding    | noncoding |
| MSTRG.141388.17 | CHST15       | XLOC_140375 | 8495  | coding | coding    | coding    | noncoding |
| MSTRG.141532.1  | LOC105378539 | XLOC_140391 | 9842  | coding | coding    | coding    | noncoding |
| MSTRG.141629.7  | CTBP2        | XLOC_140405 | 2749  | coding | coding    | coding    | coding    |
| NM_130435.5     | PTPRE        | XLOC_140534 | 4915  | coding | coding    | coding    | coding    |
| XM_024447980.1  | IDH1         | XLOC_140816 | 1847  | coding | coding    | noncoding | coding    |
| MSTRG.132015.1  | NET1         | XLOC_140977 | 232   | coding | noncoding | noncoding | noncoding |

|                   |              |             |       |        |           |           |           |
|-------------------|--------------|-------------|-------|--------|-----------|-----------|-----------|
| MSTRG. 132116. 4  | LOC105376384 | XLOC_141001 | 2797  | coding | coding    | coding    | coding    |
| NM_001282645. 1   | PRKCQ        | XLOC_141020 | 3224  | coding | coding    | coding    | coding    |
| MSTRG. 132684. 1  | CELF2-AS1    | XLOC_141185 | 16538 | coding | coding    | noncoding | noncoding |
| NM_001321648. 1   | NUDT5        | XLOC_141240 | 3545  | coding | coding    | coding    | coding    |
| MSTRG. 132876. 10 | CAMK1D       | XLOC_141249 | 4486  | coding | coding    | coding    | coding    |
| MSTRG. 132908. 5  | CAMK1D       | XLOC_141255 | 2631  | coding | noncoding | noncoding | noncoding |
| MSTRG. 132997. 4  | RPP38-DT     | XLOC_141347 | 1069  | coding | coding    | coding    | noncoding |
| MSTRG. 132997. 5  | RPP38-DT     | XLOC_141347 | 1119  | coding | coding    | noncoding | noncoding |
| MSTRG. 132997. 6  | RPP38        | XLOC_141347 | 1119  | coding | coding    | noncoding | noncoding |
| MSTRG. 133090. 4  | PTER         | XLOC_141405 | 2411  | coding | coding    | noncoding | noncoding |
| MSTRG. 133090. 7  | PTER         | XLOC_141405 | 1846  | coding | coding    | noncoding | noncoding |
| MSTRG. 133177. 5  | VIM-AS1      | XLOC_141447 | 2174  | coding | coding    | coding    | noncoding |
| NM_001270383. 1   | ENKUR        | XLOC_141716 | 3295  | coding | coding    | coding    | coding    |
| MSTRG. 133804. 6  | APBB1IP      | XLOC_141752 | 1988  | coding | coding    | coding    | noncoding |
| MSTRG. 133804. 11 | APBB1IP      | XLOC_141752 | 10370 | coding | noncoding | coding    | noncoding |
| NM_014263. 4      | YME1L1       | XLOC_141785 | 4191  | coding | coding    | coding    | coding    |
| XM_017016106. 1   | MKX          | XLOC_141822 | 3867  | coding | coding    | coding    | coding    |
| MSTRG. 134077. 3  | WAC-AS1      | XLOC_141870 | 4079  | coding | coding    | coding    | noncoding |
| MSTRG. 134330. 12 | ZEB1         | XLOC_142023 | 4987  | coding | coding    | noncoding | coding    |
| MSTRG. 134330. 11 | ZEB1         | XLOC_142023 | 4984  | coding | coding    | noncoding | coding    |
| MSTRG. 134330. 29 | LOC100505502 | XLOC_142023 | 15500 | coding | coding    | coding    | coding    |
| MSTRG. 134727. 10 | CCDC7        | XLOC_142097 | 1322  | coding | noncoding | coding    | noncoding |
| MSTRG. 134784. 1  | CCDC7        | XLOC_142138 | 312   | coding | coding    | noncoding | noncoding |
| MSTRG. 134840. 6  | ZNF37A       | XLOC_142287 | 3387  | coding | coding    | noncoding | noncoding |
| MSTRG. 134869. 1  | HSD17B7P2    | XLOC_142300 | 256   | coding | noncoding | noncoding | noncoding |
| MSTRG. 134994. 8  | CSGALNACT2   | XLOC_142374 | 3582  | coding | coding    | noncoding | noncoding |
| MSTRG. 135058. 2  | ZNF485       | XLOC_142407 | 1787  | coding | coding    | noncoding | noncoding |
| MSTRG. 135109. 1  |              | XLOC_142439 | 298   | coding | noncoding | noncoding | noncoding |
| MSTRG. 135173. 2  | ALOX5        | XLOC_142461 | 2481  | coding | coding    | coding    | coding    |
| MSTRG. 135176. 10 | 8-Mar        | XLOC_142464 | 6143  | coding | coding    | coding    | coding    |
| MSTRG. 135473. 5  | AGAP7P       | XLOC_142477 | 2175  | coding | coding    | coding    | coding    |
| MSTRG. 135473. 6  | WASHC2C      | XLOC_142477 | 248   | coding | coding    | noncoding | noncoding |
| MSTRG. 135478. 3  | WASHC2C      | XLOC_142478 | 4705  | coding | coding    | coding    | noncoding |
| MSTRG. 135488. 1  | NCOA4        | XLOC_142481 | 3428  | coding | coding    | coding    | coding    |
| NM_001145260. 1   | NCOA4        | XLOC_142481 | 3738  | coding | coding    | coding    | coding    |
| MSTRG. 135491. 9  | LOC107984026 | XLOC_142483 | 1165  | coding | noncoding | coding    | noncoding |
| MSTRG. 135566. 4  | WASHC2A      | XLOC_142611 | 2542  | coding | coding    | coding    | noncoding |
| MSTRG. 135944. 2  | TFAM         | XLOC_142867 | 1710  | coding | coding    | noncoding | noncoding |
| MSTRG. 136625. 3  | NRBF2        | XLOC_143074 | 1681  | coding | coding    | noncoding | noncoding |
| MSTRG. 136625. 4  | NRBF2        | XLOC_143074 | 1535  | coding | coding    | noncoding | noncoding |
| NM_001322258. 2   | JMJD1C       | XLOC_143078 | 8322  | coding | coding    | coding    | coding    |
| NM_001318154. 2   | JMJD1C       | XLOC_143078 | 8428  | coding | coding    | coding    | coding    |

|                 |              |             |       |        |           |           |           |
|-----------------|--------------|-------------|-------|--------|-----------|-----------|-----------|
| NM_022079.3     | HERC4        | XLOC_143177 | 4448  | coding | coding    | coding    | coding    |
| MSTRG.136790.1  |              | XLOC_143294 | 214   | coding | noncoding | noncoding | noncoding |
| MSTRG.136999.40 | ASCC1        | XLOC_143397 | 1658  | coding | coding    | noncoding | noncoding |
| MSTRG.137033.2  | MCU          | XLOC_143425 | 2812  | coding | coding    | noncoding | noncoding |
| NR_160427.1     | BMS1P4-AGAP5 | XLOC_143489 | 3796  | coding | coding    | coding    | coding    |
| MSTRG.137167.4  | SEC24C       | XLOC_143494 | 4418  | coding | coding    | coding    | noncoding |
| MSTRG.137231.8  | SAMD8        | XLOC_143553 | 1767  | coding | coding    | noncoding | noncoding |
| MSTRG.138042.2  | LRMDA        | XLOC_143564 | 832   | coding | coding    | coding    | noncoding |
| MSTRG.137659.4  | TSPAN14      | XLOC_143725 | 1395  | coding | coding    | coding    | coding    |
| MSTRG.137659.11 | TSPAN14      | XLOC_143725 | 6599  | coding | noncoding | noncoding | noncoding |
| MSTRG.137804.3  | CCSER2       | XLOC_143816 | 3044  | coding | noncoding | coding    | noncoding |
| MSTRG.137804.5  | CCSER2       | XLOC_143816 | 2757  | coding | noncoding | coding    | noncoding |
| XR_002957094.1  | LOC112268064 | XLOC_143903 | 2198  | coding | noncoding | noncoding | noncoding |
| XM_011540303.3  | ATAD1        | XLOC_143928 | 1706  | coding | coding    | coding    | coding    |
| MSTRG.138017.6  | KLLN         | XLOC_143932 | 11876 | coding | coding    | coding    | noncoding |
| MSTRG.138396.5  | LOC107984251 | XLOC_144036 | 12644 | coding | coding    | coding    | noncoding |
| MSTRG.138560.1  |              | XLOC_144141 | 367   | coding | coding    | noncoding | noncoding |
| NM_014391.2     | ANKRD1       | XLOC_144142 | 1974  | coding | coding    | coding    | coding    |
| MSTRG.138662.4  | BTAF1        | XLOC_144173 | 3210  | coding | coding    | coding    | noncoding |
| MSTRG.138662.5  | BTAF1        | XLOC_144173 | 8021  | coding | coding    | coding    | noncoding |
| MSTRG.138781.1  | EXOC6        | XLOC_144198 | 2556  | coding | coding    | noncoding | noncoding |
| MSTRG.138859.1  |              | XLOC_144244 | 1048  | coding | noncoding | noncoding | noncoding |
| MSTRG.139075.6  | LOC102723665 | XLOC_144419 | 10355 | coding | coding    | coding    | noncoding |
| XM_017016494.1  | AVPI1        | XLOC_144457 | 1566  | coding | coding    | coding    | coding    |
| MSTRG.139264.1  | ZFYVE27      | XLOC_144461 | 1421  | coding | coding    | coding    | noncoding |
| NM_001278.5     | CHUK         | XLOC_144569 | 3600  | coding | coding    | coding    | coding    |
| MSTRG.139595.1  | BTRC         | XLOC_144623 | 686   | coding | noncoding | noncoding | noncoding |
| MSTRG.139616.40 | DPCD         | XLOC_144624 | 802   | coding | coding    | noncoding | noncoding |
| MSTRG.139665.2  | NFKB2        | XLOC_144675 | 2803  | coding | coding    | coding    | noncoding |
| MSTRG.139725.4  | RPARP-AS1    | XLOC_144683 | 443   | coding | noncoding | noncoding | noncoding |
| MSTRG.139824.3  | PDCD11       | XLOC_144756 | 2596  | coding | coding    | noncoding | noncoding |
| MSTRG.140210.1  |              | XLOC_144973 | 343   | coding | noncoding | noncoding | noncoding |
| XM_006717846.3  | ABLIM1       | XLOC_145207 | 7808  | coding | coding    | coding    | coding    |
| MSTRG.141031.9  | FAM45A       | XLOC_145377 | 2535  | coding | coding    | noncoding | noncoding |
| NM_001256379.1  | MCMBP        | XLOC_145415 | 4102  | coding | coding    | coding    | coding    |
| MSTRG.141089.4  | SEC23IP      | XLOC_145421 | 3729  | coding | coding    | noncoding | noncoding |
| MSTRG.141419.1  |              | XLOC_145561 | 601   | coding | noncoding | noncoding | noncoding |
| MSTRG.141467.1  |              | XLOC_145604 | 306   | coding | noncoding | noncoding | noncoding |
| MSTRG.141490.1  |              | XLOC_145624 | 910   | coding | noncoding | noncoding | noncoding |
| MSTRG.141628.10 | CTBP2        | XLOC_145721 | 6435  | coding | coding    | noncoding | noncoding |
| MSTRG.141628.11 | CTBP2        | XLOC_145721 | 8402  | coding | coding    | coding    | coding    |
| MSTRG.141618.5  | EDRF1-AS1    | XLOC_145739 | 4452  | coding | noncoding | coding    | coding    |

|                   |          |             |       |        |           |           |           |
|-------------------|----------|-------------|-------|--------|-----------|-----------|-----------|
| MSTRG. 142328. 7  | RNH1     | XLOC_146130 | 1695  | coding | coding    | coding    | coding    |
| XM_011520236. 3   | PHRF1    | XLOC_146136 | 5557  | coding | coding    | coding    | coding    |
| MSTRG. 142339. 11 | IRF7     | XLOC_146136 | 1821  | coding | coding    | coding    | noncoding |
| NM_001242932. 1   | LSP1     | XLOC_146204 | 2016  | coding | coding    | coding    | coding    |
| NM_001256235. 1   | PGAP2    | XLOC_146325 | 1815  | coding | coding    | coding    | coding    |
| XM_011519997. 1   | PGAP2    | XLOC_146325 | 2392  | coding | coding    | coding    | coding    |
| MSTRG. 142724. 1  |          | XLOC_146361 | 246   | coding | noncoding | noncoding | noncoding |
| MSTRG. 142837. 1  |          | XLOC_146367 | 399   | coding | coding    | coding    | noncoding |
| NM_001004754. 2   | OR5112   | XLOC_146434 | 1070  | coding | coding    | coding    | coding    |
| MSTRG. 143136. 20 | ILK      | XLOC_146551 | 1524  | coding | coding    | coding    | noncoding |
| MSTRG. 143271. 3  | TRIM66   | XLOC_146658 | 1364  | coding | noncoding | noncoding | noncoding |
| MSTRG. 143325. 6  | DENND5A  | XLOC_146688 | 4915  | coding | coding    | coding    | coding    |
| MSTRG. 144081. 3  | COPB1    | XLOC_146921 | 3276  | coding | coding    | noncoding | noncoding |
| MSTRG. 143960. 12 | SOX6     | XLOC_146994 | 3695  | coding | coding    | noncoding | noncoding |
| MSTRG. 144130. 2  | HPS5     | XLOC_147079 | 4455  | coding | noncoding | noncoding | noncoding |
| MSTRG. 144130. 5  | GTF2H1   | XLOC_147079 | 4731  | coding | noncoding | coding    | noncoding |
| MSTRG. 144191. 7  | LDHAL6A  | XLOC_147086 | 3113  | coding | coding    | coding    | coding    |
| XM_005252729. 3   | HIPK3    | XLOC_147557 | 7497  | coding | coding    | coding    | coding    |
| XM_017017076. 1   | HIPK3    | XLOC_147557 | 7107  | coding | coding    | coding    | coding    |
| MSTRG. 145109. 4  | LMO2     | XLOC_147587 | 1807  | coding | coding    | coding    | noncoding |
| MSTRG. 145109. 5  | LMO2     | XLOC_147587 | 1958  | coding | coding    | coding    | coding    |
| MSTRG. 145596. 1  |          | XLOC_147876 | 311   | coding | noncoding | noncoding | noncoding |
| MSTRG. 146052. 10 | PHF21A   | XLOC_148073 | 4189  | coding | coding    | coding    | coding    |
| MSTRG. 146052. 11 | PHF21A   | XLOC_148073 | 12780 | coding | coding    | coding    | coding    |
| MSTRG. 146052. 20 | PHF21A   | XLOC_148073 | 2586  | coding | noncoding | noncoding | noncoding |
| NM_001251935. 1   | NR1H3    | XLOC_148120 | 1920  | coding | coding    | coding    | coding    |
| MSTRG. 146160. 4  | SP11     | XLOC_148130 | 3759  | coding | coding    | coding    | coding    |
| MSTRG. 146201. 2  | FNBP4    | XLOC_148151 | 5322  | coding | coding    | coding    | coding    |
| MSTRG. 146469. 4  | SLC43A3  | XLOC_148336 | 2556  | coding | coding    | noncoding | noncoding |
| MSTRG. 146479. 2  | TIMM10   | XLOC_148344 | 1414  | coding | coding    | coding    | coding    |
| MSTRG. 146545. 1  |          | XLOC_148385 | 248   | coding | noncoding | noncoding | noncoding |
| NM_001369455. 1   | FAM111A  | XLOC_148456 | 3907  | coding | coding    | coding    | coding    |
| MSTRG. 146697. 1  | DTX4     | XLOC_148466 | 9237  | coding | coding    | coding    | coding    |
| MSTRG. 146828. 2  | MS4A4E   | XLOC_148522 | 747   | coding | noncoding | noncoding | noncoding |
| NM_206938. 1      | MS4A7    | XLOC_148527 | 2874  | coding | coding    | coding    | coding    |
| MSTRG. 146931. 1  | CPSF7    | XLOC_148602 | 3660  | coding | coding    | coding    | coding    |
| MSTRG. 147043. 13 | AHNAK    | XLOC_148658 | 11914 | coding | noncoding | coding    | coding    |
| MSTRG. 147043. 27 | AHNAK    | XLOC_148658 | 14802 | coding | noncoding | coding    | coding    |
| NM_001265591. 2   | RTN3     | XLOC_148721 | 2273  | coding | coding    | coding    | coding    |
| NM_001265589. 2   | RTN3     | XLOC_148721 | 4917  | coding | coding    | coding    | coding    |
| MSTRG. 147187. 1  | C11orf95 | XLOC_148725 | 423   | coding | coding    | noncoding | noncoding |
| XM_005273783. 3   | SPINDOC  | XLOC_148727 | 1988  | coding | coding    | coding    | coding    |

|                   |            |             |       |        |           |           |           |
|-------------------|------------|-------------|-------|--------|-----------|-----------|-----------|
| MSTRG. 147308. 4  | RASGRP2    | XLOC_148785 | 2330  | coding | coding    | coding    | noncoding |
| MSTRG. 147315. 12 | SF1        | XLOC_148789 | 5704  | coding | coding    | coding    | noncoding |
| MSTRG. 147297. 2  | MAP4K2     | XLOC_148792 | 714   | coding | coding    | noncoding | noncoding |
| MSTRG. 147424. 3  | NEAT1      | XLOC_148840 | 13107 | coding | noncoding | noncoding | noncoding |
| MSTRG. 147424. 2  | NEAT1      | XLOC_148840 | 21520 | coding | noncoding | coding    | noncoding |
| NR_002819. 4      | MALAT1     | XLOC_148861 | 8779  | coding | noncoding | noncoding | noncoding |
| XM_024448620. 1   | SCYL1      | XLOC_148864 | 2780  | coding | coding    | coding    | coding    |
| MSTRG. 147472. 1  |            | XLOC_148869 | 274   | coding | noncoding | noncoding | noncoding |
| MSTRG. 147502. 6  | SNX32      | XLOC_148888 | 1173  | coding | coding    | coding    | coding    |
| MSTRG. 147656. 8  | RBM4       | XLOC_148981 | 2297  | coding | coding    | coding    | coding    |
| MSTRG. 147805. 1  | ACY3       | XLOC_149064 | 293   | coding | coding    | noncoding | noncoding |
| MSTRG. 147901. 1  | MRPL21     | XLOC_149144 | 700   | coding | coding    | noncoding | coding    |
| MSTRG. 148156. 37 | LRTOMT     | XLOC_149253 | 1419  | coding | coding    | coding    | coding    |
| MSTRG. 148315. 13 | KCNE3      | XLOC_149332 | 2385  | coding | coding    | noncoding | noncoding |
| MSTRG. 148678. 4  | PAK1       | XLOC_149501 | 4983  | coding | coding    | noncoding | noncoding |
| MSTRG. 149026. 6  | KCTD21-AS1 | XLOC_149528 | 2447  | coding | coding    | coding    | coding    |
| MSTRG. 149030. 16 | GAB2       | XLOC_149529 | 10285 | coding | noncoding | coding    | coding    |
| MSTRG. 149143. 5  | CREBZF     | XLOC_149802 | 6784  | coding | noncoding | coding    | noncoding |
| MSTRG. 149140. 1  | CCDC89     | XLOC_149809 | 434   | coding | noncoding | noncoding | noncoding |
| MSTRG. 150042. 22 | CEP295     | XLOC_150098 | 4975  | coding | coding    | noncoding | coding    |
| MSTRG. 149936. 1  |            | XLOC_150124 | 304   | coding | coding    | noncoding | noncoding |
| MSTRG. 149976. 4  | MRE11      | XLOC_150146 | 4428  | coding | coding    | noncoding | noncoding |
| XR_947911. 2      | LINC02700  | XLOC_150159 | 11925 | coding | coding    | coding    | coding    |
| MSTRG. 150651. 6  | MAML2      | XLOC_150264 | 9543  | coding | noncoding | noncoding | noncoding |
| MSTRG. 150651. 15 | MIR1260B   | XLOC_150264 | 19840 | coding | coding    | noncoding | noncoding |
| MSTRG. 150509. 1  | MMP8       | XLOC_150444 | 2962  | coding | coding    | coding    | noncoding |
| MSTRG. 150509. 3  | MMP8       | XLOC_150444 | 1611  | coding | coding    | coding    | noncoding |
| MSTRG. 150791. 1  | PDGFD      | XLOC_150491 | 1446  | coding | noncoding | noncoding | noncoding |
| MSTRG. 150916. 12 | CASP1      | XLOC_150526 | 2568  | coding | coding    | noncoding | noncoding |
| MSTRG. 151254. 1  | ATM        | XLOC_150643 | 21847 | coding | coding    | coding    | coding    |
| XM_011542844. 3   | ATM        | XLOC_150643 | 10076 | coding | coding    | coding    | coding    |
| XM_011542845. 2   | ATM        | XLOC_150643 | 8588  | coding | coding    | coding    | coding    |
| MSTRG. 151321. 1  | NKAPD1     | XLOC_150813 | 4202  | coding | coding    | coding    | coding    |
| MSTRG. 151548. 2  | USP28      | XLOC_150892 | 4487  | coding | coding    | coding    | noncoding |
| MSTRG. 151548. 3  | USP28      | XLOC_150892 | 4346  | coding | coding    | coding    | noncoding |
| MSTRG. 151748. 2  | ZPR1       | XLOC_150990 | 2616  | coding | coding    | noncoding | noncoding |
| NM_001558. 3      | IL10RA     | XLOC_151079 | 3656  | coding | coding    | coding    | coding    |
| MSTRG. 151948. 2  | JAML       | XLOC_151094 | 1750  | coding | coding    | noncoding | coding    |
| NM_032873. 5      | UBASH3B    | XLOC_151310 | 6865  | coding | coding    | coding    | coding    |
| XM_024448623. 1   | GRAMD1B    | XLOC_151348 | 1861  | coding | noncoding | coding    | coding    |
| XR_001748011. 2   | TBRG1      | XLOC_151399 | 5357  | coding | coding    | coding    | coding    |
| XM_017018286. 1   | FAM118B    | XLOC_151486 | 2445  | coding | coding    | coding    | coding    |

|                 |              |             |       |        |           |           |           |
|-----------------|--------------|-------------|-------|--------|-----------|-----------|-----------|
| NM_002017.5     | FLI1         | XLOC_151567 | 3825  | coding | coding    | coding    | coding    |
| MSTRG.152891.1  |              | XLOC_151678 | 390   | coding | noncoding | noncoding | noncoding |
| MSTRG.152923.1  |              | XLOC_151703 | 260   | coding | noncoding | noncoding | noncoding |
| MSTRG.152935.1  |              | XLOC_151714 | 404   | coding | noncoding | noncoding | noncoding |
| MSTRG.142373.1  | LOC105376504 | XLOC_151894 | 3424  | coding | noncoding | noncoding | coding    |
| XM_005253046.1  | SIGIRR       | XLOC_151900 | 2016  | coding | coding    | coding    | coding    |
| MSTRG.142425.2  | CD151        | XLOC_151940 | 1472  | coding | coding    | coding    | coding    |
| MSTRG.142536.6  | C11orf21     | XLOC_152007 | 736   | coding | coding    | coding    | noncoding |
| MSTRG.142722.1  |              | XLOC_152111 | 273   | coding | coding    | noncoding | noncoding |
| MSTRG.142830.1  | TRIM21       | XLOC_152112 | 12702 | coding | coding    | coding    | coding    |
| MSTRG.142830.6  | OR52K2       | XLOC_152112 | 28075 | coding | coding    | coding    | noncoding |
| MSTRG.142830.13 | OR52K2       | XLOC_152112 | 14229 | coding | coding    | noncoding | noncoding |
| MSTRG.142830.18 |              | XLOC_152112 | 30155 | coding | coding    | coding    | coding    |
| MSTRG.142830.20 |              | XLOC_152112 | 12275 | coding | coding    | noncoding | noncoding |
| XM_017018462.2  | TRIM5        | XLOC_152169 | 1595  | coding | coding    | coding    | coding    |
| NM_001242854.1  | ARFIP2       | XLOC_152230 | 3846  | coding | coding    | coding    | coding    |
| MSTRG.143123.1  | RRP8         | XLOC_152254 | 292   | coding | noncoding | noncoding | noncoding |
| MSTRG.143137.1  | TAF10        | XLOC_152258 | 2811  | coding | coding    | coding    | noncoding |
| MSTRG.143195.2  | PPFIBP2      | XLOC_152304 | 3759  | coding | coding    | coding    | noncoding |
| MSTRG.143239.2  | TMEM9B       | XLOC_152363 | 1982  | coding | coding    | coding    | noncoding |
| MSTRG.143239.6  | TMEM9B       | XLOC_152363 | 1275  | coding | noncoding | noncoding | noncoding |
| MSTRG.143346.3  | ZNF143       | XLOC_152409 | 3631  | coding | coding    | coding    | coding    |
| MSTRG.143346.4  | ZNF143       | XLOC_152409 | 2778  | coding | coding    | coding    | coding    |
| MSTRG.143433.4  | AMPD3        | XLOC_152504 | 3667  | coding | coding    | coding    | coding    |
| MSTRG.143442.1  | MRV11        | XLOC_152507 | 5261  | coding | coding    | coding    | coding    |
| MSTRG.143726.2  | FAR1         | XLOC_152621 | 5741  | coding | coding    | noncoding | noncoding |
| MSTRG.144118.7  | CYP2R1       | XLOC_152683 | 4052  | coding | coding    | coding    | coding    |
| MSTRG.144118.10 | PDE3B        | XLOC_152683 | 15918 | coding | coding    | coding    | noncoding |
| MSTRG.143835.1  |              | XLOC_152697 | 275   | coding | noncoding | noncoding | noncoding |
| MSTRG.144014.1  | NCR3LG1      | XLOC_152805 | 997   | coding | coding    | noncoding | noncoding |
| MSTRG.144418.2  | HTATIP2      | XLOC_152954 | 1683  | coding | coding    | noncoding | noncoding |
| MSTRG.144446.1  | ANO5         | XLOC_153006 | 250   | coding | noncoding | noncoding | noncoding |
| MSTRG.144454.1  | ANO5         | XLOC_153013 | 246   | coding | coding    | noncoding | noncoding |
| MSTRG.144571.1  | GAS2         | XLOC_153031 | 343   | coding | coding    | coding    | noncoding |
| NM_148893.3     | SVIP         | XLOC_153042 | 4479  | coding | coding    | noncoding | noncoding |
| MSTRG.145013.2  | LOC105376615 | XLOC_153363 | 7339  | coding | coding    | coding    | coding    |
| MSTRG.145077.9  | HIPK3        | XLOC_153393 | 1584  | coding | noncoding | noncoding | noncoding |
| MSTRG.146134.1  | ZNF408       | XLOC_153843 | 737   | coding | noncoding | noncoding | noncoding |
| MSTRG.146833.2  | MS4A4A       | XLOC_154194 | 1639  | coding | coding    | noncoding | coding    |
| MSTRG.146794.5  | MS4A7        | XLOC_154198 | 1067  | coding | coding    | noncoding | noncoding |
| MSTRG.146911.13 | TMEM138      | XLOC_154241 | 625   | coding | coding    | noncoding | noncoding |
| MSTRG.146985.5  | LOC107984334 | XLOC_154276 | 1952  | coding | coding    | coding    | noncoding |

|                   |              |             |       |        |           |           |           |
|-------------------|--------------|-------------|-------|--------|-----------|-----------|-----------|
| MSTRG. 147024. 1  | ASRGL1       | XLOC_154309 | 286   | coding | coding    | noncoding | noncoding |
| MSTRG. 147148. 4  | TTC9C        | XLOC_154341 | 1294  | coding | noncoding | coding    | noncoding |
| NM_018093. 3      | WDR74        | XLOC_154352 | 1373  | coding | coding    | coding    | coding    |
| MSTRG. 147131. 1  |              | XLOC_154391 | 378   | coding | noncoding | noncoding | noncoding |
| MSTRG. 147232. 1  | TRPT1        | XLOC_154421 | 3498  | coding | coding    | coding    | coding    |
| MSTRG. 147235. 4  | NUDT22       | XLOC_154422 | 1175  | coding | noncoding | coding    | noncoding |
| MSTRG. 147235. 5  | DNAJC4       | XLOC_154422 | 1156  | coding | coding    | coding    | noncoding |
| NM_138689. 3      | PPP1R14B     | XLOC_154425 | 989   | coding | coding    | coding    | coding    |
| MSTRG. 147435. 6  | NEAT1        | XLOC_154510 | 19411 | coding | noncoding | noncoding | coding    |
| MSTRG. 147435. 8  | NEAT1        | XLOC_154510 | 11585 | coding | noncoding | coding    | noncoding |
| MSTRG. 147435. 17 | NEAT1        | XLOC_154510 | 3518  | coding | noncoding | noncoding | coding    |
| MSTRG. 147419. 11 | TALAM1       | XLOC_154517 | 6403  | coding | noncoding | noncoding | noncoding |
| MSTRG. 147419. 12 | TALAM1       | XLOC_154517 | 6139  | coding | noncoding | noncoding | noncoding |
| MSTRG. 147756. 4  | TBC1D10C     | XLOC_154664 | 2244  | coding | coding    | coding    | coding    |
| XR_001747983. 2   | TMEM134      | XLOC_154674 | 1107  | coding | coding    | coding    | coding    |
| XR_001748282. 2   | LOC107984344 | XLOC_154758 | 907   | coding | noncoding | coding    | noncoding |
| MSTRG. 148207. 2  | P2RY2        | XLOC_154960 | 1176  | coding | coding    | coding    | noncoding |
| MSTRG. 148439. 4  | XRRA1        | XLOC_155056 | 14995 | coding | coding    | coding    | noncoding |
| MSTRG. 148439. 6  | XRRA1        | XLOC_155056 | 16330 | coding | coding    | coding    | noncoding |
| MSTRG. 148635. 2  | ACER3        | XLOC_155144 | 1277  | coding | coding    | noncoding | noncoding |
| MSTRG. 148655. 1  | GDPD4        | XLOC_155154 | 357   | coding | noncoding | noncoding | noncoding |
| XM_017017847. 2   | PAK1         | XLOC_155157 | 3095  | coding | coding    | coding    | coding    |
| XM_017018388. 2   | PICALM       | XLOC_155530 | 3451  | coding | coding    | coding    | coding    |
| MSTRG. 149369. 4  | HIKESHI      | XLOC_155568 | 937   | coding | coding    | noncoding | noncoding |
| MSTRG. 149679. 1  | LOC101929174 | XLOC_155666 | 273   | coding | noncoding | noncoding | noncoding |
| MSTRG. 150060. 3  | MED17        | XLOC_155845 | 1145  | coding | noncoding | coding    | noncoding |
| MSTRG. 149945. 1  |              | XLOC_155858 | 542   | coding | noncoding | noncoding | noncoding |
| MSTRG. 149985. 5  | ANKRD49      | XLOC_155878 | 3821  | coding | coding    | noncoding | noncoding |
| MSTRG. 150125. 3  | SESN3        | XLOC_155913 | 9771  | coding | coding    | coding    | coding    |
| MSTRG. 150185. 15 | CEP57        | XLOC_155926 | 3411  | coding | coding    | noncoding | noncoding |
| MSTRG. 150727. 1  | MAML2        | XLOC_156006 | 714   | coding | noncoding | noncoding | noncoding |
| MSTRG. 150226. 2  | JRKL         | XLOC_156044 | 2876  | coding | coding    | noncoding | noncoding |
| XM_011542735. 3   | ANGPTL5      | XLOC_156191 | 2693  | coding | coding    | noncoding | coding    |
| NM_001257119. 3   | CASP1        | XLOC_156312 | 1933  | coding | coding    | coding    | coding    |
| MSTRG. 150991. 1  | LOC105369477 | XLOC_156378 | 291   | coding | noncoding | noncoding | noncoding |
| MSTRG. 151245. 2  | ACAT1        | XLOC_156417 | 660   | coding | coding    | noncoding | noncoding |
| MSTRG. 151257. 1  | C11orf65     | XLOC_156421 | 10964 | coding | coding    | coding    | noncoding |
| MSTRG. 151257. 20 | C11orf65     | XLOC_156421 | 11320 | coding | coding    | noncoding | noncoding |
| MSTRG. 151257. 19 | C11orf65     | XLOC_156421 | 11306 | coding | coding    | noncoding | noncoding |
| MSTRG. 151257. 28 | C11orf65     | XLOC_156421 | 3177  | coding | coding    | noncoding | noncoding |
| MSTRG. 151097. 1  | ZC3H12C      | XLOC_156453 | 2400  | coding | noncoding | coding    | noncoding |
| MSTRG. 151118. 1  |              | XLOC_156470 | 290   | coding | noncoding | noncoding | noncoding |

|                 |              |             |       |        |           |           |           |
|-----------------|--------------|-------------|-------|--------|-----------|-----------|-----------|
| XM_024448598.1  | PPP2R1B      | XLOC_156531 | 5995  | coding | coding    | coding    | coding    |
| MSTRG.151296.1  |              | XLOC_156562 | 243   | coding | noncoding | noncoding | noncoding |
| MSTRG.151404.1  |              | XLOC_156569 | 949   | coding | noncoding | noncoding | noncoding |
| XR_001748023.2  | ZPR1         | XLOC_156798 | 3073  | coding | coding    | coding    | coding    |
| XM_011542726.1  | SIK3         | XLOC_156803 | 2588  | coding | coding    | coding    | coding    |
| MSTRG.151755.2  | PAFAH1B2     | XLOC_156857 | 3904  | coding | coding    | coding    | noncoding |
| NM_001164837.2  | FXYD6        | XLOC_156882 | 2132  | coding | coding    | coding    | noncoding |
| MSTRG.151967.3  | LOC100131626 | XLOC_156912 | 5865  | coding | coding    | noncoding | noncoding |
| MSTRG.151967.8  | LOC100131626 | XLOC_156912 | 8712  | coding | coding    | noncoding | noncoding |
| MSTRG.152018.3  | LOC101929089 | XLOC_156914 | 17279 | coding | coding    | coding    | noncoding |
| XM_005271422.3  | DPAGT1       | XLOC_156947 | 2021  | coding | coding    | coding    | coding    |
| MSTRG.152291.1  |              | XLOC_157100 | 259   | coding | noncoding | noncoding | noncoding |
| MSTRG.152526.6  | SIAE         | XLOC_157210 | 3433  | coding | coding    | noncoding | noncoding |
| MSTRG.152796.3  | ST3GAL4      | XLOC_157274 | 1562  | coding | coding    | coding    | coding    |
| NM_001161707.1  | KIRREL3      | XLOC_157276 | 2534  | coding | coding    | coding    | coding    |
| MSTRG.152871.11 | FLI1         | XLOC_157365 | 5042  | coding | coding    | coding    | coding    |
| MSTRG.152871.16 | SENCR        | XLOC_157365 | 7424  | coding | coding    | coding    | coding    |
| MSTRG.153082.5  | APLP2        | XLOC_157433 | 2259  | coding | coding    | coding    | coding    |
| MSTRG.153398.9  | CCDC77       | XLOC_157605 | 5472  | coding | coding    | coding    | coding    |
| MSTRG.153374.2  | LOC101929432 | XLOC_157617 | 1008  | coding | noncoding | noncoding | noncoding |
| MSTRG.153431.1  | FBXL14       | XLOC_157661 | 2783  | coding | coding    | coding    | coding    |
| MSTRG.153756.10 | PARP11       | XLOC_157728 | 3863  | coding | coding    | coding    | noncoding |
| MSTRG.153756.13 | PARP11       | XLOC_157728 | 1556  | coding | coding    | noncoding | noncoding |
| MSTRG.153849.16 | TAPBPL       | XLOC_157833 | 5144  | coding | coding    | coding    | coding    |
| MSTRG.153887.5  | ZNF384       | XLOC_157849 | 2845  | coding | coding    | noncoding | noncoding |
| XM_024449106.1  | PTPN6        | XLOC_157877 | 2152  | coding | coding    | coding    | coding    |
| NM_002831.6     | PTPN6        | XLOC_157877 | 2161  | coding | coding    | coding    | coding    |
| MSTRG.153977.1  |              | XLOC_157896 | 269   | coding | noncoding | noncoding | noncoding |
| MSTRG.154117.1  | LOC107987171 | XLOC_157947 | 326   | coding | noncoding | noncoding | noncoding |
| MSTRG.154129.1  |              | XLOC_157956 | 234   | coding | noncoding | noncoding | noncoding |
| MSTRG.154136.1  | LINC00937    | XLOC_157962 | 302   | coding | noncoding | noncoding | noncoding |
| MSTRG.154142.1  | LINC00937    | XLOC_157967 | 340   | coding | noncoding | noncoding | noncoding |
| MSTRG.154175.8  | CLEC4E       | XLOC_157984 | 2890  | coding | coding    | noncoding | noncoding |
| MSTRG.154380.6  | PHC1         | XLOC_157998 | 7860  | coding | coding    | coding    | coding    |
| MSTRG.154380.15 | PHC1         | XLOC_157998 | 2325  | coding | coding    | noncoding | noncoding |
| MSTRG.154238.1  |              | XLOC_158123 | 280   | coding | noncoding | coding    | noncoding |
| MSTRG.154245.5  | CLEC7A       | XLOC_158126 | 3935  | coding | coding    | noncoding | noncoding |
| MSTRG.154245.7  | CLEC7A       | XLOC_158126 | 3643  | coding | coding    | noncoding | noncoding |
| MSTRG.154242.1  | OLR1         | XLOC_158129 | 641   | coding | coding    | noncoding | noncoding |
| MSTRG.154488.1  | LOC101928100 | XLOC_158150 | 14181 | coding | coding    | coding    | coding    |
| MSTRG.154488.5  | LOC101928100 | XLOC_158150 | 14494 | coding | coding    | coding    | noncoding |
| MSTRG.154488.11 | LOC101928100 | XLOC_158150 | 2876  | coding | coding    | noncoding | coding    |

|                 |             |             |       |        |           |           |           |
|-----------------|-------------|-------------|-------|--------|-----------|-----------|-----------|
| MSTRG.154488.19 | KLRC4-KLRK1 | XLOC_158150 | 8528  | coding | coding    | noncoding | noncoding |
| MSTRG.154438.1  |             | XLOC_158152 | 232   | coding | coding    | noncoding | noncoding |
| MSTRG.154461.1  |             | XLOC_158171 | 519   | coding | noncoding | noncoding | noncoding |
| MSTRG.154562.1  | PRH1-PRR4   | XLOC_158188 | 235   | coding | noncoding | noncoding | noncoding |
| MSTRG.154557.4  | DUSP16      | XLOC_158307 | 1036  | coding | noncoding | noncoding | noncoding |
| MSTRG.154716.1  | GPRC5D      | XLOC_158350 | 424   | coding | noncoding | noncoding | noncoding |
| MSTRG.154878.2  | ERP27       | XLOC_158452 | 2472  | coding | coding    | noncoding | noncoding |
| MSTRG.154929.1  | EPS8        | XLOC_158486 | 315   | coding | coding    | noncoding | noncoding |
| MSTRG.155389.11 | GOLT1B      | XLOC_158643 | 3330  | coding | coding    | noncoding | noncoding |
| MSTRG.155507.4  | C2CD5       | XLOC_158698 | 625   | coding | noncoding | noncoding | noncoding |
| MSTRG.155712.6  | ETFRF1      | XLOC_158845 | 6341  | coding | coding    | noncoding | noncoding |
| MSTRG.155712.8  | KRAS        | XLOC_158845 | 4762  | coding | noncoding | noncoding | noncoding |
| MSTRG.155905.10 | ITPR2       | XLOC_158887 | 3548  | coding | coding    | coding    | noncoding |
| NM_001171887.2  | FGFR10P2    | XLOC_158900 | 2818  | coding | coding    | coding    | coding    |
| NM_004264.5     | MED21       | XLOC_158901 | 2669  | coding | coding    | coding    | coding    |
| XM_024448893.1  | STK38L      | XLOC_158914 | 5458  | coding | coding    | coding    | coding    |
| MSTRG.155796.1  |             | XLOC_158957 | 318   | coding | noncoding | noncoding | noncoding |
| NM_001352086.2  | CCDC91      | XLOC_158961 | 2786  | coding | noncoding | coding    | coding    |
| MSTRG.156158.1  | CCDC91      | XLOC_158977 | 325   | coding | noncoding | noncoding | noncoding |
| MSTRG.156200.12 | ERGIC2      | XLOC_159015 | 3848  | coding | coding    | noncoding | noncoding |
| MSTRG.156262.2  | CAPRIN2     | XLOC_159140 | 4015  | coding | coding    | noncoding | noncoding |
| XM_011520558.2  | FGD4        | XLOC_159204 | 7297  | coding | coding    | coding    | coding    |
| MSTRG.156789.2  | YAF2        | XLOC_159422 | 1441  | coding | coding    | coding    | noncoding |
| NM_001364833.2  | PPHLN1      | XLOC_159426 | 2483  | coding | noncoding | coding    | coding    |
| XM_024449008.1  | IRAK4       | XLOC_159476 | 1643  | coding | noncoding | noncoding | coding    |
| MSTRG.157091.9  | SCAF11      | XLOC_159582 | 5202  | coding | noncoding | noncoding | noncoding |
| MSTRG.157393.29 | PCED1B      | XLOC_159668 | 1259  | coding | noncoding | noncoding | noncoding |
| MSTRG.157332.1  | LINC02416   | XLOC_159685 | 461   | coding | noncoding | noncoding | noncoding |
| MSTRG.157410.2  | RPAP3       | XLOC_159720 | 3140  | coding | coding    | noncoding | noncoding |
| MSTRG.157440.3  | PFKM        | XLOC_159739 | 8616  | coding | coding    | coding    | coding    |
| MSTRG.157440.2  | PFKM        | XLOC_159739 | 8259  | coding | coding    | coding    | coding    |
| NM_001354741.1  | PFKM        | XLOC_159739 | 3310  | coding | coding    | coding    | coding    |
| MSTRG.157500.2  | ZNF641      | XLOC_159753 | 14264 | coding | coding    | noncoding | noncoding |
| MSTRG.157500.6  | ZNF641      | XLOC_159753 | 2701  | coding | coding    | coding    | noncoding |
| MSTRG.157804.5  | KCNH3       | XLOC_159818 | 5899  | coding | coding    | coding    | coding    |
| NM_001098576.1  | TMBIM6      | XLOC_159821 | 3254  | coding | coding    | coding    | coding    |
| MSTRG.157938.2  | SLC11A2     | XLOC_159903 | 2109  | coding | coding    | noncoding | coding    |
| MSTRG.157938.5  | SLC11A2     | XLOC_159903 | 1571  | coding | coding    | noncoding | coding    |
| NM_001136264.1  | DAZAP2      | XLOC_159915 | 2100  | coding | coding    | coding    | coding    |
| MSTRG.157992.1  |             | XLOC_159928 | 290   | coding | coding    | noncoding | noncoding |
| MSTRG.158351.1  |             | XLOC_160085 | 214   | coding | noncoding | noncoding | noncoding |
| MSTRG.158411.1  | TESPA1      | XLOC_160089 | 4173  | coding | coding    | noncoding | noncoding |

|                   |              |             |       |        |           |           |           |
|-------------------|--------------|-------------|-------|--------|-----------|-----------|-----------|
| MSTRG. 158432. 9  | LOC105369779 | XLOC_160128 | 2489  | coding | coding    | coding    | noncoding |
| MSTRG. 158445. 5  | SARNP        | XLOC_160129 | 543   | coding | coding    | noncoding | noncoding |
| MSTRG. 158582. 2  | PRIM1        | XLOC_160197 | 2138  | coding | coding    | noncoding | coding    |
| MSTRG. 158648. 6  | R3HDM2       | XLOC_160232 | 3203  | coding | coding    | coding    | noncoding |
| MSTRG. 158648. 7  | R3HDM2       | XLOC_160232 | 2194  | coding | coding    | noncoding | noncoding |
| MSTRG. 158992. 15 | MON2         | XLOC_160399 | 307   | coding | noncoding | noncoding | noncoding |
| NM_001251922. 2   | RAP1B        | XLOC_160822 | 13237 | coding | coding    | coding    | noncoding |
| XM_006719400. 4   | MDM2         | XLOC_160839 | 7270  | coding | coding    | coding    | coding    |
| MSTRG. 159602. 8  | MDM2         | XLOC_160839 | 637   | coding | coding    | noncoding | noncoding |
| MSTRG. 160077. 1  | LOC105369842 | XLOC_161071 | 557   | coding | noncoding | noncoding | noncoding |
| MSTRG. 161249. 2  | DUSP6        | XLOC_161492 | 5548  | coding | coding    | coding    | coding    |
| MSTRG. 161249. 12 | POC1B-GALNT4 | XLOC_161492 | 2573  | coding | coding    | noncoding | noncoding |
| MSTRG. 161249. 18 | POC1B        | XLOC_161492 | 975   | coding | noncoding | noncoding | noncoding |
| XR_945216. 2      | LOC105369908 | XLOC_161652 | 2188  | coding | noncoding | noncoding | noncoding |
| MSTRG. 161190. 2  | NUDT4        | XLOC_161673 | 12129 | coding | coding    | coding    | coding    |
| MSTRG. 161565. 2  | CEP83        | XLOC_161745 | 986   | coding | noncoding | noncoding | noncoding |
| MSTRG. 161565. 3  | CEP83        | XLOC_161745 | 912   | coding | noncoding | noncoding | noncoding |
| MSTRG. 161401. 2  | NR2C1        | XLOC_161812 | 2417  | coding | coding    | coding    | noncoding |
| MSTRG. 161695. 14 | CDK17        | XLOC_161867 | 1018  | coding | noncoding | coding    | noncoding |
| MSTRG. 161695. 15 | CDK17        | XLOC_161867 | 4348  | coding | noncoding | noncoding | noncoding |
| MSTRG. 161771. 5  | UHRF1BP1L    | XLOC_161990 | 1986  | coding | coding    | noncoding | coding    |
| MSTRG. 161771. 4  | UHRF1BP1L    | XLOC_161990 | 1931  | coding | coding    | noncoding | coding    |
| MSTRG. 161771. 6  | UHRF1BP1L    | XLOC_161990 | 1879  | coding | coding    | noncoding | coding    |
| MSTRG. 161771. 7  | UHRF1BP1L    | XLOC_161990 | 600   | coding | noncoding | coding    | noncoding |
| XR_001748816. 1   | CHPT1        | XLOC_162048 | 2788  | coding | coding    | coding    | coding    |
| MSTRG. 161928. 6  | WASHC3       | XLOC_162063 | 1531  | coding | coding    | noncoding | noncoding |
| XM_017019369. 1   | CHST11       | XLOC_162204 | 5339  | coding | coding    | coding    | coding    |
| MSTRG. 162214. 1  |              | XLOC_162337 | 458   | coding | coding    | noncoding | coding    |
| MSTRG. 162620. 4  | SELPLG       | XLOC_162483 | 4356  | coding | noncoding | coding    | coding    |
| MSTRG. 162620. 3  | SELPLG       | XLOC_162483 | 4420  | coding | noncoding | coding    | coding    |
| MSTRG. 162624. 4  | LOC105369968 | XLOC_162484 | 8114  | coding | coding    | coding    | coding    |
| XM_017020025. 2   | TCHP         | XLOC_162532 | 3294  | coding | coding    | coding    | coding    |
| MSTRG. 162793. 5  | GIT2         | XLOC_162541 | 6887  | coding | coding    | coding    | noncoding |
| MSTRG. 162793. 4  | GIT2         | XLOC_162541 | 5547  | coding | coding    | coding    | noncoding |
| XM_005253981. 3   | ANKRD13A     | XLOC_162542 | 3910  | coding | coding    | coding    | coding    |
| MSTRG. 162853. 1  | VPS29        | XLOC_162567 | 2586  | coding | coding    | noncoding | noncoding |
| MSTRG. 162903. 9  | TCTN1        | XLOC_162571 | 3392  | coding | coding    | coding    | coding    |
| MSTRG. 162926. 2  | BRAP         | XLOC_162608 | 3708  | coding | coding    | coding    | noncoding |
| MSTRG. 162926. 4  | BRAP         | XLOC_162608 | 1506  | coding | coding    | noncoding | noncoding |
| MSTRG. 162998. 2  | NAA25        | XLOC_162632 | 5144  | coding | coding    | noncoding | noncoding |
| MSTRG. 163017. 3  | HECTD4       | XLOC_162639 | 12461 | coding | noncoding | coding    | coding    |
| MSTRG. 163017. 5  | HECTD4       | XLOC_162639 | 9338  | coding | noncoding | coding    | coding    |

|                 |              |             |       |        |           |           |           |
|-----------------|--------------|-------------|-------|--------|-----------|-----------|-----------|
| MSTRG.163017.11 | HECTD4       | XLOC_162639 | 3314  | coding | noncoding | coding    | noncoding |
| MSTRG.162959.2  | RPL6         | XLOC_162642 | 1500  | coding | coding    | coding    | noncoding |
| MSTRG.162959.6  | RPL6         | XLOC_162642 | 705   | coding | coding    | noncoding | noncoding |
| NM_002534.3     | OAS1         | XLOC_162651 | 1627  | coding | coding    | coding    | coding    |
| MSTRG.163270.14 | MED13L       | XLOC_162741 | 2713  | coding | noncoding | noncoding | noncoding |
| MSTRG.163280.2  | MED13L       | XLOC_162744 | 40080 | coding | noncoding | noncoding | noncoding |
| NM_001085481.3  | MAP1LC3B2    | XLOC_162756 | 818   | coding | coding    | coding    | coding    |
| XR_001748653.1  | FBXW8        | XLOC_162765 | 6320  | coding | coding    | coding    | coding    |
| MSTRG.163354.1  | FBXW8        | XLOC_162777 | 231   | coding | noncoding | noncoding | noncoding |
| MSTRG.163299.2  | TESC         | XLOC_162783 | 950   | coding | noncoding | coding    | noncoding |
| MSTRG.163453.14 | TAOK3        | XLOC_162813 | 2532  | coding | coding    | noncoding | noncoding |
| NR_033684.1     | GATC         | XLOC_162879 | 4346  | coding | noncoding | coding    | coding    |
| XM_024448851.1  | TMEM120B     | XLOC_162938 | 1564  | coding | coding    | coding    | coding    |
| MSTRG.163725.1  | CLIP1        | XLOC_162958 | 5816  | coding | coding    | coding    | coding    |
| MSTRG.163734.8  | HCAR2        | XLOC_162967 | 2112  | coding | coding    | coding    | coding    |
| MSTRG.163734.12 | HCAR2        | XLOC_162967 | 3953  | coding | coding    | coding    | coding    |
| MSTRG.163803.8  | MPHOSPH9     | XLOC_162991 | 3824  | coding | noncoding | noncoding | noncoding |
| MSTRG.163814.2  | CDK2AP1      | XLOC_162996 | 1287  | coding | coding    | noncoding | noncoding |
| MSTRG.163834.5  | SNRNP35      | XLOC_163006 | 1703  | coding | noncoding | noncoding | noncoding |
| MSTRG.164334.3  | GLT1D1       | XLOC_163211 | 4349  | coding | coding    | coding    | coding    |
| MSTRG.164498.3  | ANKLE2       | XLOC_163356 | 4318  | coding | coding    | coding    | noncoding |
| MSTRG.164498.4  | ANKLE2       | XLOC_163356 | 3148  | coding | coding    | coding    | noncoding |
| MSTRG.164510.2  | ZNF605       | XLOC_163369 | 1158  | coding | coding    | noncoding | noncoding |
| MSTRG.153660.2  | RAD52        | XLOC_163445 | 13351 | coding | coding    | coding    | coding    |
| NM_152441.3     | FBXL14       | XLOC_163455 | 2527  | coding | coding    | coding    | coding    |
| NM_006422.3     | AKAP3        | XLOC_163583 | 3318  | coding | coding    | coding    | coding    |
| MSTRG.153848.6  | TAPBPL       | XLOC_163662 | 1413  | coding | coding    | coding    | coding    |
| NM_004054.4     | C3AR1        | XLOC_163767 | 3434  | coding | coding    | coding    | coding    |
| MSTRG.154090.1  | LOC112268090 | XLOC_163801 | 243   | coding | coding    | noncoding | noncoding |
| MSTRG.154383.7  | A2M          | XLOC_163854 | 33068 | coding | coding    | coding    | noncoding |
| MSTRG.154383.16 | A2M          | XLOC_163854 | 61915 | coding | coding    | coding    | noncoding |
| MSTRG.154383.27 | A2M          | XLOC_163854 | 22081 | coding | coding    | coding    | coding    |
| MSTRG.154196.1  |              | XLOC_163857 | 297   | coding | noncoding | noncoding | noncoding |
| MSTRG.154274.1  |              | XLOC_163872 | 601   | coding | noncoding | noncoding | noncoding |
| MSTRG.154275.1  | OVOS         | XLOC_163873 | 595   | coding | coding    | noncoding | noncoding |
| MSTRG.154278.1  | OVOS         | XLOC_163875 | 230   | coding | noncoding | noncoding | noncoding |
| MSTRG.154279.1  | OVOS         | XLOC_163876 | 374   | coding | coding    | noncoding | noncoding |
| MSTRG.154281.1  | OVOS         | XLOC_163878 | 306   | coding | noncoding | noncoding | noncoding |
| MSTRG.154291.1  | KLRB1        | XLOC_163885 | 1254  | coding | coding    | noncoding | coding    |
| MSTRG.154297.15 | CLEC2D       | XLOC_163888 | 28852 | coding | coding    | coding    | noncoding |
| MSTRG.154297.18 | LOC374443    | XLOC_163888 | 2094  | coding | noncoding | noncoding | noncoding |
| MSTRG.154297.20 |              | XLOC_163888 | 6194  | coding | noncoding | coding    | noncoding |

|                   |              |             |       |        |           |           |           |
|-------------------|--------------|-------------|-------|--------|-----------|-----------|-----------|
| MSTRG. 154341. 5  | CLEC1B       | XLOC_163911 | 3869  | coding | coding    | noncoding | noncoding |
| MSTRG. 154341. 4  | CLEC1B       | XLOC_163911 | 4208  | coding | coding    | noncoding | noncoding |
| MSTRG. 154341. 11 | CLEC1B       | XLOC_163911 | 5863  | coding | coding    | noncoding | noncoding |
| MSTRG. 154341. 12 | CLEC1B       | XLOC_163911 | 6112  | coding | coding    | noncoding | noncoding |
| MSTRG. 154341. 15 | CLEC1B       | XLOC_163911 | 12534 | coding | coding    | noncoding | noncoding |
| MSTRG. 154341. 17 | CLEC1B       | XLOC_163911 | 5571  | coding | coding    | noncoding | noncoding |
| MSTRG. 154344. 1  | CLEC12A      | XLOC_163912 | 1458  | coding | coding    | noncoding | noncoding |
| MSTRG. 154354. 1  | LOC102724020 | XLOC_163918 | 2072  | coding | coding    | noncoding | noncoding |
| NR_120484. 1      | LOC102724020 | XLOC_163918 | 670   | coding | noncoding | noncoding | noncoding |
| MSTRG. 154247. 11 | CLEC7A       | XLOC_163927 | 1633  | coding | coding    | noncoding | coding    |
| MSTRG. 154981. 5  | ATF7IP       | XLOC_164119 | 10392 | coding | coding    | noncoding | coding    |
| MSTRG. 154981. 7  | ATF7IP       | XLOC_164119 | 2586  | coding | coding    | noncoding | coding    |
| MSTRG. 154981. 9  | ATF7IP       | XLOC_164119 | 8835  | coding | noncoding | noncoding | noncoding |
| MSTRG. 154981. 11 | ATF7IP       | XLOC_164119 | 5254  | coding | noncoding | noncoding | coding    |
| MSTRG. 155091. 1  | MGST1        | XLOC_164221 | 869   | coding | coding    | noncoding | noncoding |
| MSTRG. 155197. 1  |              | XLOC_164338 | 223   | coding | noncoding | noncoding | noncoding |
| MSTRG. 155246. 1  |              | XLOC_164386 | 202   | coding | noncoding | noncoding | noncoding |
| MSTRG. 155483. 3  | ETNK1        | XLOC_164440 | 17982 | coding | coding    | coding    | noncoding |
| MSTRG. 155483. 5  | ETNK1        | XLOC_164440 | 4020  | coding | noncoding | coding    | noncoding |
| MSTRG. 155483. 6  | ETNK1        | XLOC_164440 | 1760  | coding | coding    | coding    | noncoding |
| NM_004985. 5      | KRAS         | XLOC_164506 | 5306  | coding | coding    | coding    | coding    |
| MSTRG. 155732. 2  | MED21        | XLOC_164643 | 3960  | coding | coding    | noncoding | noncoding |
| MSTRG. 155766. 3  | STK38L       | XLOC_164650 | 3947  | coding | coding    | noncoding | noncoding |
| MSTRG. 155833. 2  | MRPS35       | XLOC_164685 | 1750  | coding | coding    | noncoding | noncoding |
| MSTRG. 156140. 7  | LOC729291    | XLOC_164695 | 1369  | coding | noncoding | noncoding | coding    |
| NM_001278412. 1   | AMN1         | XLOC_164841 | 2319  | coding | coding    | noncoding | coding    |
| MSTRG. 156401. 3  | FGD4         | XLOC_164887 | 3867  | coding | coding    | noncoding | noncoding |
| MSTRG. 156460. 3  | DNM1L        | XLOC_164891 | 2052  | coding | coding    | noncoding | noncoding |
| MSTRG. 156455. 1  |              | XLOC_164908 | 223   | coding | noncoding | noncoding | noncoding |
| MSTRG. 156723. 1  | C12orf40     | XLOC_165004 | 536   | coding | noncoding | noncoding | noncoding |
| MSTRG. 156898. 13 | LRRK2        | XLOC_165040 | 4050  | coding | coding    | noncoding | noncoding |
| MSTRG. 156898. 14 | LRRK2        | XLOC_165040 | 10407 | coding | coding    | coding    | coding    |
| MSTRG. 156866. 9  | PPHLN1       | XLOC_165099 | 3203  | coding | coding    | noncoding | noncoding |
| MSTRG. 156866. 10 | PPHLN1       | XLOC_165099 | 851   | coding | noncoding | noncoding | coding    |
| MSTRG. 157111. 21 | IRAK4        | XLOC_165128 | 3752  | coding | coding    | coding    | noncoding |
| MSTRG. 157111. 22 | IRAK4        | XLOC_165128 | 6026  | coding | coding    | coding    | noncoding |
| MSTRG. 156943. 4  | PLEKHA8P1    | XLOC_165310 | 5950  | coding | coding    | coding    | noncoding |
| NM_004719. 3      | SCAF11       | XLOC_165329 | 7552  | coding | noncoding | coding    | coding    |
| MSTRG. 157678. 1  |              | XLOC_165428 | 333   | coding | noncoding | noncoding | noncoding |
| MSTRG. 157392. 5  | AMIGO2       | XLOC_165506 | 5134  | coding | coding    | coding    | coding    |
| MSTRG. 157392. 13 | PCED1B-AS1   | XLOC_165506 | 2286  | coding | noncoding | coding    | coding    |
| XM_011538481. 1   | HDAC7        | XLOC_165550 | 4135  | coding | coding    | coding    | coding    |

|                 |           |             |       |        |           |           |           |
|-----------------|-----------|-------------|-------|--------|-----------|-----------|-----------|
| XM_017019239.2  | SENP1     | XLOC_165563 | 4935  | coding | coding    | coding    | coding    |
| MSTRG.157791.1  | TUBA1A    | XLOC_165666 | 3336  | coding | coding    | coding    | coding    |
| NM_001331069.2  | CERS5     | XLOC_165744 | 2801  | coding | coding    | coding    | coding    |
| MSTRG.157942.6  | LARP4     | XLOC_165769 | 1781  | coding | coding    | noncoding | noncoding |
| MSTRG.157942.9  | LARP4     | XLOC_165769 | 1157  | coding | noncoding | noncoding | noncoding |
| XM_005268607.1  | GALNT6    | XLOC_165798 | 4958  | coding | coding    | coding    | coding    |
| MSTRG.158094.2  | ATG101    | XLOC_165868 | 397   | coding | coding    | noncoding | noncoding |
| MSTRG.158185.1  | IGFBP6    | XLOC_165937 | 478   | coding | coding    | noncoding | noncoding |
| MSTRG.158220.3  | SP1       | XLOC_165949 | 8299  | coding | coding    | coding    | noncoding |
| MSTRG.158312.3  | COPZ1     | XLOC_166000 | 2647  | coding | coding    | coding    | noncoding |
| MSTRG.158312.9  | COPZ1     | XLOC_166000 | 2415  | coding | coding    | coding    | noncoding |
| MSTRG.158459.2  | DNAJC14   | XLOC_166081 | 695   | coding | coding    | noncoding | noncoding |
| MSTRG.158465.5  | RAB5B     | XLOC_166091 | 2336  | coding | coding    | noncoding | noncoding |
| MSTRG.158534.2  | CNPY2     | XLOC_166117 | 794   | coding | coding    | noncoding | noncoding |
| MSTRG.158556.1  | SPRYD4    | XLOC_166128 | 1719  | coding | coding    | noncoding | noncoding |
| NM_0055594.6    | NACA      | XLOC_166145 | 1099  | coding | coding    | coding    | coding    |
| MSTRG.159436.32 | USP15     | XLOC_166306 | 5400  | coding | coding    | noncoding | noncoding |
| MSTRG.159470.1  |           | XLOC_166307 | 299   | coding | coding    | noncoding | noncoding |
| MSTRG.158991.2  | MON2      | XLOC_166308 | 7316  | coding | coding    | coding    | noncoding |
| MSTRG.159094.2  | XPOT      | XLOC_166373 | 1286  | coding | coding    | noncoding | noncoding |
| MSTRG.159098.3  | TBK1      | XLOC_166374 | 1688  | coding | coding    | noncoding | noncoding |
| MSTRG.159348.3  | HELB      | XLOC_166449 | 3428  | coding | coding    | coding    | noncoding |
| MSTRG.159348.5  | HELB      | XLOC_166449 | 2950  | coding | coding    | coding    | noncoding |
| MSTRG.159614.4  | RAP1B     | XLOC_166542 | 4941  | coding | noncoding | coding    | noncoding |
| XM_011537961.1  | BEST3     | XLOC_166601 | 3996  | coding | coding    | coding    | coding    |
| MSTRG.159855.10 | LINC01481 | XLOC_166621 | 2240  | coding | coding    | coding    | noncoding |
| MSTRG.160134.2  | KRR1      | XLOC_166817 | 7972  | coding | coding    | coding    | noncoding |
| MSTRG.161189.1  | NUDT4     | XLOC_167404 | 2473  | coding | coding    | coding    | noncoding |
| MSTRG.161189.7  | NUDT4     | XLOC_167404 | 4261  | coding | coding    | coding    | noncoding |
| MSTRG.161485.4  | VEZT      | XLOC_167488 | 2679  | coding | coding    | noncoding | noncoding |
| MSTRG.161485.5  | VEZT      | XLOC_167488 | 2819  | coding | coding    | noncoding | noncoding |
| MSTRG.161504.2  | METAP2    | XLOC_167500 | 3070  | coding | coding    | noncoding | noncoding |
| MSTRG.161845.4  | ANKS1B    | XLOC_167631 | 11917 | coding | coding    | coding    | coding    |
| MSTRG.162010.7  | CHPT1     | XLOC_167678 | 2304  | coding | coding    | coding    | noncoding |
| MSTRG.162112.3  | HSP90B1   | XLOC_167768 | 2770  | coding | coding    | noncoding | noncoding |
| MSTRG.162403.4  | CHST11    | XLOC_167793 | 5786  | coding | coding    | coding    | noncoding |
| MSTRG.162403.20 | CHST11    | XLOC_167793 | 6736  | coding | noncoding | coding    | noncoding |
| MSTRG.162403.22 | CHST11    | XLOC_167793 | 11031 | coding | coding    | coding    | noncoding |
| MSTRG.162403.30 | CHST11    | XLOC_167793 | 7088  | coding | coding    | coding    | noncoding |
| MSTRG.162403.31 | CHST11    | XLOC_167793 | 4415  | coding | coding    | coding    | noncoding |
| MSTRG.162320.10 | WASHC4    | XLOC_167859 | 5225  | coding | coding    | noncoding | noncoding |
| MSTRG.162527.2  | POLR3B    | XLOC_167926 | 2459  | coding | coding    | noncoding | noncoding |

|                   |              |             |       |        |           |           |           |
|-------------------|--------------|-------------|-------|--------|-----------|-----------|-----------|
| MSTRG. 163037. 7  | OAS1         | XLOC_168219 | 11239 | coding | coding    | coding    | noncoding |
| MSTRG. 163037. 6  | OAS3         | XLOC_168219 | 16528 | coding | coding    | coding    | coding    |
| MSTRG. 163037. 11 | OAS3         | XLOC_168219 | 8968  | coding | coding    | coding    | coding    |
| MSTRG. 163037. 10 | OAS3         | XLOC_168219 | 8921  | coding | coding    | coding    | coding    |
| MSTRG. 163037. 17 | OAS2         | XLOC_168219 | 6305  | coding | coding    | coding    | noncoding |
| MSTRG. 163342. 3  | LOC100506551 | XLOC_168376 | 1169  | coding | noncoding | noncoding | noncoding |
| MSTRG. 163357. 1  | FBXW8        | XLOC_168377 | 1571  | coding | noncoding | noncoding | noncoding |
| XM_011537779. 2   | RAB35        | XLOC_168520 | 2875  | coding | coding    | coding    | coding    |
| NM_001002. 4      | RPLP0        | XLOC_168530 | 1105  | coding | coding    | coding    | coding    |
| XM_011538867. 3   | KDM2B        | XLOC_168600 | 5647  | coding | coding    | coding    | coding    |
| MSTRG. 163692. 3  | HPD          | XLOC_168616 | 294   | coding | noncoding | noncoding | noncoding |
| MSTRG. 163895. 21 | ZNF664       | XLOC_168714 | 3021  | coding | coding    | noncoding | noncoding |
| NM_145648. 4      | SLC15A4      | XLOC_168871 | 2751  | coding | coding    | coding    | coding    |
| MSTRG. 164337. 7  | GLT1D1       | XLOC_168881 | 1919  | coding | coding    | coding    | noncoding |
| MSTRG. 164323. 4  | SFSWAP       | XLOC_168982 | 2093  | coding | coding    | coding    | noncoding |
| MSTRG. 164575. 1  | ZNF10        | XLOC_169101 | 253   | coding | noncoding | noncoding | noncoding |
| XM_024449407. 1   | ZMYM2        | XLOC_169138 | 3809  | coding | coding    | coding    | coding    |
| MSTRG. 165326. 6  | GTF3A        | XLOC_169442 | 1513  | coding | coding    | noncoding | noncoding |
| MSTRG. 165578. 3  | HMGB1        | XLOC_169612 | 4502  | coding | coding    | noncoding | coding    |
| MSTRG. 165578. 5  | HMGB1        | XLOC_169612 | 4986  | coding | coding    | noncoding | noncoding |
| MSTRG. 165588. 1  | HMGB1        | XLOC_169620 | 284   | coding | noncoding | noncoding | noncoding |
| MSTRG. 166221. 1  |              | XLOC_169691 | 418   | coding | noncoding | noncoding | noncoding |
| MSTRG. 165798. 3  | N4BP2L1      | XLOC_169812 | 2476  | coding | coding    | coding    | noncoding |
| MSTRG. 165800. 3  | N4BP2L2      | XLOC_169813 | 4070  | coding | coding    | noncoding | noncoding |
| MSTRG. 166055. 3  | SPART        | XLOC_169972 | 2778  | coding | coding    | coding    | noncoding |
| MSTRG. 166177. 8  | EXOSC8       | XLOC_169994 | 2180  | coding | noncoding | coding    | noncoding |
| MSTRG. 166628. 1  |              | XLOC_170207 | 284   | coding | noncoding | noncoding | noncoding |
| MSTRG. 166629. 1  |              | XLOC_170208 | 348   | coding | coding    | noncoding | noncoding |
| MSTRG. 166706. 7  | ELF1         | XLOC_170232 | 4099  | coding | coding    | noncoding | noncoding |
| MSTRG. 166706. 9  | ELF1         | XLOC_170232 | 3683  | coding | coding    | noncoding | noncoding |
| MSTRG. 166706. 18 | ELF1         | XLOC_170232 | 2422  | coding | noncoding | noncoding | noncoding |
| XR_941899. 2      | LOC105370173 | XLOC_170251 | 1124  | coding | noncoding | noncoding | noncoding |
| XM_017020381. 2   | AKAP11       | XLOC_170283 | 9948  | coding | noncoding | coding    | coding    |
| MSTRG. 166883. 8  | EPSTI1       | XLOC_170314 | 7754  | coding | noncoding | noncoding | noncoding |
| MSTRG. 166883. 10 | EPSTI1       | XLOC_170314 | 1566  | coding | noncoding | noncoding | noncoding |
| MSTRG. 166883. 15 | EPSTI1       | XLOC_170314 | 6103  | coding | coding    | noncoding | noncoding |
| XR_941910. 2      | LOC105370178 | XLOC_170314 | 907   | coding | noncoding | noncoding | noncoding |
| MSTRG. 166917. 1  | CCDC122      | XLOC_170341 | 214   | coding | noncoding | noncoding | noncoding |
| MSTRG. 167057. 4  | TSC22D1-AS1  | XLOC_170368 | 3731  | coding | noncoding | coding    | coding    |
| MSTRG. 167143. 2  | SLC25A30-AS1 | XLOC_170420 | 3700  | coding | coding    | noncoding | noncoding |
| MSTRG. 167151. 5  | ZC3H13       | XLOC_170442 | 2326  | coding | coding    | noncoding | noncoding |
| MSTRG. 167183. 1  | LRRC63       | XLOC_170451 | 2333  | coding | coding    | noncoding | coding    |

|                   |              |             |       |        |           |           |           |
|-------------------|--------------|-------------|-------|--------|-----------|-----------|-----------|
| MSTRG. 167192. 1  | LOC105370194 | XLOC_170455 | 270   | coding | noncoding | noncoding | noncoding |
| MSTRG. 167310. 2  | SUCLA2       | XLOC_170525 | 356   | coding | coding    | noncoding | noncoding |
| MSTRG. 167350. 1  | ITM2B        | XLOC_170546 | 10225 | coding | coding    | coding    | coding    |
| MSTRG. 167493. 8  | RCBTB2       | XLOC_170591 | 2089  | coding | coding    | noncoding | noncoding |
| XM_017020440. 2   | FNDC3A       | XLOC_170616 | 5985  | coding | coding    | coding    | coding    |
| XM_017020443. 1   | FNDC3A       | XLOC_170616 | 4311  | coding | coding    | coding    | coding    |
| MSTRG. 167444. 1  | FNDC3A       | XLOC_170642 | 310   | coding | noncoding | noncoding | noncoding |
| MSTRG. 167410. 1  | LOC105370203 | XLOC_170655 | 270   | coding | noncoding | noncoding | noncoding |
| NM_001007278. 3   | TRIM13       | XLOC_170686 | 6919  | coding | coding    | coding    | coding    |
| MSTRG. 167640. 1  | ATP7B        | XLOC_170773 | 216   | coding | noncoding | noncoding | noncoding |
| MSTRG. 168730. 7  | DIS3         | XLOC_171331 | 3673  | coding | coding    | coding    | noncoding |
| MSTRG. 169029. 4  | KLF12        | XLOC_171380 | 5799  | coding | coding    | coding    | noncoding |
| XM_017020725. 1   | UCHL3        | XLOC_171458 | 1207  | coding | coding    | coding    | coding    |
| MSTRG. 169454. 22 | MYCBP2       | XLOC_171584 | 11393 | coding | coding    | coding    | coding    |
| MSTRG. 169454. 25 | MYCBP2       | XLOC_171584 | 968   | coding | coding    | noncoding | noncoding |
| MSTRG. 170235. 15 | LOC102724149 | XLOC_171993 | 2755  | coding | coding    | coding    | coding    |
| MSTRG. 170311. 1  | UGGT2        | XLOC_172028 | 313   | coding | noncoding | noncoding | noncoding |
| XM_024449300. 1   | MBNL2        | XLOC_172063 | 5798  | coding | noncoding | coding    | coding    |
| MSTRG. 170546. 3  | DOCK9        | XLOC_172127 | 2856  | coding | coding    | coding    | noncoding |
| MSTRG. 170526. 2  | GPR183       | XLOC_172154 | 3590  | coding | coding    | noncoding | noncoding |
| XM_017020612. 1   | PCCA         | XLOC_172210 | 5689  | coding | coding    | coding    | coding    |
| MSTRG. 170771. 1  | POGLUT2      | XLOC_172281 | 208   | coding | noncoding | noncoding | noncoding |
| MSTRG. 171009. 1  |              | XLOC_172423 | 337   | coding | noncoding | noncoding | noncoding |
| MSTRG. 171209. 3  | ANKRD10      | XLOC_172552 | 3315  | coding | coding    | coding    | coding    |
| NM_001363660. 2   | PSPC1        | XLOC_172737 | 4418  | coding | coding    | coding    | coding    |
| MSTRG. 164786. 10 | ZMYM2        | XLOC_172745 | 4079  | coding | coding    | noncoding | noncoding |
| MSTRG. 164786. 12 | ZMYM2        | XLOC_172745 | 1182  | coding | coding    | noncoding | noncoding |
| MSTRG. 164655. 1  | IFT88        | XLOC_172769 | 206   | coding | noncoding | noncoding | noncoding |
| XM_017020706. 2   | XPO4         | XLOC_172785 | 8448  | coding | coding    | coding    | coding    |
| MSTRG. 164699. 2  | SAP18        | XLOC_172805 | 1438  | coding | coding    | noncoding | noncoding |
| XM_017020892. 2   | LOC101928764 | XLOC_172809 | 2351  | coding | noncoding | coding    | coding    |
| MSTRG. 164952. 5  | SPATA13      | XLOC_173026 | 2353  | coding | coding    | coding    | noncoding |
| MSTRG. 164952. 4  | SPATA13      | XLOC_173026 | 8156  | coding | coding    | coding    | noncoding |
| MSTRG. 164952. 6  | SPATA13      | XLOC_173026 | 2762  | coding | coding    | coding    | noncoding |
| MSTRG. 164952. 11 | SPATA13      | XLOC_173026 | 6153  | coding | coding    | coding    | coding    |
| MSTRG. 165303. 3  | RPL21        | XLOC_173129 | 685   | coding | coding    | noncoding | noncoding |
| MSTRG. 165354. 5  | LNX2         | XLOC_173148 | 2660  | coding | noncoding | coding    | coding    |
| MSTRG. 165354. 12 | LNX2         | XLOC_173148 | 4714  | coding | noncoding | coding    | noncoding |
| MSTRG. 165414. 14 | PAN3-AS1     | XLOC_173164 | 8131  | coding | coding    | coding    | noncoding |
| MSTRG. 165406. 1  |              | XLOC_173182 | 323   | coding | coding    | noncoding | noncoding |
| MSTRG. 165821. 3  | PDS5B        | XLOC_173398 | 5271  | coding | noncoding | noncoding | noncoding |
| MSTRG. 165821. 2  | PDS5B        | XLOC_173398 | 8106  | coding | noncoding | noncoding | noncoding |

|                 |              |             |       |        |           |           |           |
|-----------------|--------------|-------------|-------|--------|-----------|-----------|-----------|
| MSTRG.165821.5  | PDS5B        | XLOC_173398 | 950   | coding | noncoding | noncoding | noncoding |
| MSTRG.165777.1  | KL           | XLOC_173414 | 523   | coding | coding    | noncoding | noncoding |
| MSTRG.166107.1  | NBEA         | XLOC_173515 | 256   | coding | noncoding | noncoding | noncoding |
| MSTRG.166120.1  | NBEA         | XLOC_173523 | 264   | coding | noncoding | noncoding | noncoding |
| NM_001370331.1  | ELF1         | XLOC_173773 | 3631  | coding | coding    | coding    | coding    |
| MSTRG.166725.3  | WBP4         | XLOC_173789 | 569   | coding | coding    | noncoding | noncoding |
| MSTRG.166769.5  | NAA16        | XLOC_173803 | 3653  | coding | coding    | noncoding | noncoding |
| XM_005266374.2  | LCP1         | XLOC_174038 | 3675  | coding | coding    | coding    | coding    |
| MSTRG.167287.2  | LRCH1        | XLOC_174072 | 2866  | coding | coding    | coding    | noncoding |
| NM_014166.4     | MED4         | XLOC_174114 | 2254  | coding | coding    | coding    | coding    |
| MSTRG.167357.2  | ITM2B        | XLOC_174122 | 16066 | coding | coding    | coding    | noncoding |
| MSTRG.167457.9  | RB1          | XLOC_174125 | 3373  | coding | coding    | noncoding | coding    |
| MSTRG.167395.1  | CYSLTR2      | XLOC_174140 | 4787  | coding | coding    | noncoding | noncoding |
| MSTRG.167417.2  | FNDC3A       | XLOC_174157 | 4861  | coding | coding    | coding    | coding    |
| MSTRG.168862.1  | DLEU1        | XLOC_174270 | 511   | coding | noncoding | noncoding | noncoding |
| MSTRG.167849.2  | WDFY2        | XLOC_174413 | 4174  | coding | coding    | coding    | noncoding |
| MSTRG.167681.1  | OLFM4        | XLOC_174463 | 2317  | coding | coding    | noncoding | noncoding |
| MSTRG.168746.3  | PIBF1        | XLOC_174873 | 1144  | coding | noncoding | noncoding | noncoding |
| MSTRG.169141.2  | UCHL3        | XLOC_175001 | 564   | coding | coding    | noncoding | noncoding |
| MSTRG.169128.1  |              | XLOC_175053 | 260   | coding | noncoding | noncoding | noncoding |
| XM_017020538.2  | FBXL3        | XLOC_175057 | 1337  | coding | coding    | coding    | coding    |
| XM_005266337.3  | FBXL3        | XLOC_175057 | 3162  | coding | noncoding | coding    | coding    |
| MSTRG.169905.1  | LINC00373    | XLOC_175463 | 278   | coding | noncoding | noncoding | noncoding |
| MSTRG.170889.2  | PCCA         | XLOC_175818 | 1399  | coding | coding    | noncoding | noncoding |
| MSTRG.171466.6  | ATP11A       | XLOC_176242 | 4224  | coding | coding    | coding    | noncoding |
| MSTRG.171486.12 | TMCO3        | XLOC_176281 | 2295  | coding | coding    | coding    | noncoding |
| MSTRG.171496.9  | TFDP1        | XLOC_176284 | 2320  | coding | coding    | coding    | noncoding |
| NM_001145.4     | ANG          | XLOC_176422 | 1222  | coding | coding    | coding    | coding    |
| MSTRG.171915.13 | HAUS4        | XLOC_176525 | 2908  | coding | coding    | coding    | noncoding |
| MSTRG.171941.11 | LOC107984665 | XLOC_176535 | 3531  | coding | coding    | coding    | coding    |
| MSTRG.171941.10 | LOC107984665 | XLOC_176535 | 3684  | coding | coding    | coding    | coding    |
| NR_104265.1     | GMPR2        | XLOC_176600 | 1996  | coding | coding    | coding    | coding    |
| MSTRG.172088.12 | KHNYN        | XLOC_176611 | 1558  | coding | coding    | noncoding | noncoding |
| MSTRG.172542.4  | HECTD1       | XLOC_176770 | 9105  | coding | coding    | coding    | coding    |
| MSTRG.172464.2  | HEATR5A      | XLOC_176772 | 7429  | coding | noncoding | coding    | coding    |
| MSTRG.172479.1  | LOC101927124 | XLOC_176777 | 521   | coding | noncoding | noncoding | noncoding |
| MSTRG.172773.1  | LOC102724945 | XLOC_176871 | 384   | coding | noncoding | noncoding | noncoding |
| MSTRG.173056.3  | RALGAPA1     | XLOC_176918 | 3775  | coding | noncoding | coding    | noncoding |
| MSTRG.173056.5  | RALGAPA1     | XLOC_176918 | 3375  | coding | noncoding | coding    | noncoding |
| NM_003616.2     | GEMIN2       | XLOC_177056 | 1359  | coding | coding    | noncoding | coding    |
| MSTRG.173123.4  | TRAPPC6B     | XLOC_177063 | 463   | coding | noncoding | noncoding | noncoding |
| MSTRG.173485.2  | KLHL28       | XLOC_177191 | 5997  | coding | coding    | coding    | noncoding |

|                   |              |             |       |        |           |           |           |
|-------------------|--------------|-------------|-------|--------|-----------|-----------|-----------|
| MSTRG. 173462. 3  | MIS18BP1     | XLOC_177203 | 2624  | coding | coding    | noncoding | noncoding |
| MSTRG. 173614. 1  | RN7SL1       | XLOC_177292 | 279   | coding | noncoding | coding    | noncoding |
| MSTRG. 173678. 1  | NEMF         | XLOC_177306 | 321   | coding | noncoding | coding    | noncoding |
| MSTRG. 173678. 27 | LOC105378179 | XLOC_177306 | 282   | coding | noncoding | noncoding | noncoding |
| MSTRG. 173678. 29 | LOC105378179 | XLOC_177306 | 1015  | coding | noncoding | noncoding | noncoding |
| MSTRG. 173721. 2  | SAV1         | XLOC_177334 | 2509  | coding | coding    | noncoding | noncoding |
| MSTRG. 173789. 3  | LOC105370489 | XLOC_177337 | 16919 | coding | noncoding | coding    | coding    |
| MSTRG. 173789. 1  | LOC105370489 | XLOC_177337 | 12500 | coding | noncoding | coding    | noncoding |
| MSTRG. 173789. 10 | NIN          | XLOC_177337 | 11516 | coding | noncoding | noncoding | coding    |
| MSTRG. 173789. 18 | NIN          | XLOC_177337 | 8570  | coding | noncoding | coding    | noncoding |
| MSTRG. 173789. 24 | NIN          | XLOC_177337 | 3823  | coding | noncoding | noncoding | noncoding |
| MSTRG. 174172. 4  | DDHD1        | XLOC_177474 | 3494  | coding | coding    | coding    | coding    |
| MSTRG. 174172. 5  | DDHD1        | XLOC_177474 | 3078  | coding | coding    | coding    | coding    |
| MSTRG. 174105. 4  | GCH1         | XLOC_177538 | 2409  | coding | coding    | coding    | noncoding |
| MSTRG. 174620. 1  | PSMA3        | XLOC_177741 | 11824 | coding | coding    | coding    | coding    |
| MSTRG. 174620. 12 | PSMA3-AS1    | XLOC_177741 | 2124  | coding | noncoding | noncoding | noncoding |
| XM_005267964. 2   | ARID4A       | XLOC_177743 | 5951  | coding | coding    | coding    | coding    |
| XM_017021458. 1   | PRKCH        | XLOC_177889 | 3194  | coding | coding    | coding    | coding    |
| NM_001243084. 1   | HIF1A        | XLOC_177965 | 3956  | coding | coding    | coding    | coding    |
| XM_011536628. 3   | PLEKHG3      | XLOC_178053 | 7931  | coding | coding    | coding    | coding    |
| MSTRG. 175127. 4  | SPTB         | XLOC_178056 | 4251  | coding | coding    | coding    | coding    |
| MSTRG. 175217. 1  |              | XLOC_178156 | 280   | coding | noncoding | noncoding | noncoding |
| MSTRG. 175721. 1  |              | XLOC_178213 | 253   | coding | coding    | noncoding | noncoding |
| XM_011536503. 2   | FAM71D       | XLOC_178268 | 2724  | coding | coding    | coding    | coding    |
| MSTRG. 175794. 12 | ATP6V1D      | XLOC_178271 | 1768  | coding | coding    | noncoding | noncoding |
| MSTRG. 175358. 2  | ZFP36L1      | XLOC_178365 | 2297  | coding | coding    | coding    | coding    |
| XM_017021096. 1   | PCNX1        | XLOC_178519 | 12562 | coding | coding    | coding    | coding    |
| XM_005267425. 4   | PCNX1        | XLOC_178519 | 12586 | coding | coding    | coding    | coding    |
| XM_005267422. 4   | PCNX1        | XLOC_178519 | 12889 | coding | coding    | coding    | coding    |
| NM_001308160. 2   | PCNX1        | XLOC_178519 | 12532 | coding | coding    | coding    | coding    |
| MSTRG. 175700. 1  | PCNX1        | XLOC_178562 | 296   | coding | noncoding | noncoding | noncoding |
| MSTRG. 176027. 7  | PAPLN        | XLOC_178703 | 9615  | coding | coding    | coding    | coding    |
| NM_025057. 3      | BBOF1        | XLOC_178733 | 3113  | coding | coding    | coding    | coding    |
| MSTRG. 176265. 3  | NEK9         | XLOC_178798 | 1343  | coding | coding    | coding    | noncoding |
| MSTRG. 176480. 5  | TMED8        | XLOC_178905 | 4034  | coding | coding    | coding    | noncoding |
| MSTRG. 176495. 4  | VIPAS39      | XLOC_178911 | 2415  | coding | coding    | coding    | noncoding |
| MSTRG. 176504. 2  | SLIRP        | XLOC_178917 | 2526  | coding | coding    | noncoding | coding    |
| MSTRG. 176998. 1  | CEP128       | XLOC_178992 | 441   | coding | noncoding | noncoding | noncoding |
| MSTRG. 177055. 1  | CEP128       | XLOC_179039 | 374   | coding | noncoding | noncoding | noncoding |
| MSTRG. 177072. 1  | CEP128       | XLOC_179055 | 514   | coding | noncoding | noncoding | noncoding |
| MSTRG. 176896. 1  |              | XLOC_179261 | 985   | coding | noncoding | noncoding | noncoding |
| NM_024824. 5      | ZC3H14       | XLOC_179288 | 18153 | coding | coding    | coding    | coding    |

|                 |              |             |       |        |           |           |           |
|-----------------|--------------|-------------|-------|--------|-----------|-----------|-----------|
| MSTRG.177185.1  | EML5         | XLOC_179292 | 624   | coding | coding    | noncoding | noncoding |
| MSTRG.177199.1  | EML5         | XLOC_179306 | 308   | coding | noncoding | noncoding | noncoding |
| NM_001102366.2  | DGLUCY       | XLOC_179405 | 3182  | coding | coding    | coding    | coding    |
| MSTRG.177439.8  | TC2N         | XLOC_179435 | 3724  | coding | noncoding | noncoding | noncoding |
| MSTRG.177439.10 | TC2N         | XLOC_179435 | 1466  | coding | noncoding | noncoding | noncoding |
| MSTRG.177447.3  | TRIP11       | XLOC_179438 | 6489  | coding | noncoding | noncoding | coding    |
| XM_011536440.2  | SLC24A4      | XLOC_179455 | 9688  | coding | coding    | coding    | coding    |
| MSTRG.177559.1  | ASB2         | XLOC_179518 | 265   | coding | coding    | noncoding | noncoding |
| MSTRG.177768.1  | DICER1-AS1   | XLOC_179560 | 12628 | coding | coding    | coding    | noncoding |
| MSTRG.177830.5  | ATG2B        | XLOC_179608 | 1763  | coding | noncoding | noncoding | noncoding |
| NM_001271905.1  | GSKIP        | XLOC_179609 | 2212  | coding | coding    | coding    | coding    |
| MSTRG.178576.16 | CINP         | XLOC_180089 | 1639  | coding | noncoding | coding    | noncoding |
| NM_145725.2     | TRAF3        | XLOC_180115 | 7776  | coding | coding    | coding    | coding    |
| MSTRG.178784.5  | LOC102723342 | XLOC_180218 | 1776  | coding | coding    | coding    | coding    |
| MSTRG.178995.4  | IGHA2        | XLOC_180279 | 1159  | coding | coding    | coding    | noncoding |
| MSTRG.178995.6  | IGHA2        | XLOC_180279 | 1629  | coding | coding    | coding    | noncoding |
| MSTRG.171811.2  | ZNF219       | XLOC_180445 | 5183  | coding | coding    | coding    | coding    |
| XM_011536710.2  | HNRNPC       | XLOC_180453 | 3199  | coding | coding    | coding    | coding    |
| XM_024449556.1  | HNRNPC       | XLOC_180453 | 3692  | coding | coding    | coding    | coding    |
| XM_024449558.1  | HNRNPC       | XLOC_180453 | 2978  | coding | coding    | coding    | coding    |
| XM_006720125.3  | HNRNPC       | XLOC_180453 | 2485  | coding | coding    | coding    | coding    |
| MSTRG.171824.3  | RPGRIP1      | XLOC_180466 | 321   | coding | noncoding | noncoding | noncoding |
| MSTRG.172221.1  | TRAV1-1      | XLOC_180514 | 635   | coding | coding    | noncoding | noncoding |
| MSTRG.172250.22 | TRAV1-1      | XLOC_180531 | 2538  | coding | coding    | noncoding | noncoding |
| MSTRG.172250.43 | TRAV1-1      | XLOC_180531 | 10437 | coding | coding    | coding    | noncoding |
| MSTRG.171864.2  | ABHD4        | XLOC_180559 | 3168  | coding | coding    | noncoding | noncoding |
| XM_011537245.3  | ZFHx2        | XLOC_180644 | 9463  | coding | coding    | noncoding | coding    |
| NR_023921.2     | DHRS4-AS1    | XLOC_180654 | 3052  | coding | noncoding | coding    | noncoding |
| NR_023922.2     | DHRS4-AS1    | XLOC_180654 | 2793  | coding | noncoding | noncoding | noncoding |
| NM_006405.7     | TM9SF1       | XLOC_180677 | 2200  | coding | coding    | coding    | coding    |
| XM_011536659.3  | CIDEb        | XLOC_180689 | 2043  | coding | coding    | coding    | coding    |
| MSTRG.172091.2  | SDR39U1      | XLOC_180696 | 6609  | coding | coding    | coding    | coding    |
| MSTRG.172435.6  | G2E3         | XLOC_180816 | 1514  | coding | coding    | noncoding | noncoding |
| MSTRG.172598.1  | NUBPL        | XLOC_180897 | 262   | coding | coding    | coding    | noncoding |
| MSTRG.172599.1  | NUBPL        | XLOC_180898 | 386   | coding | noncoding | noncoding | noncoding |
| MSTRG.172636.1  | NUBPL        | XLOC_180933 | 321   | coding | noncoding | noncoding | noncoding |
| MSTRG.172558.3  | ARHGAP5-AS1  | XLOC_180959 | 7646  | coding | coding    | coding    | noncoding |
| MSTRG.172859.6  | FAM177A1     | XLOC_181060 | 1804  | coding | coding    | coding    | noncoding |
| MSTRG.173010.1  |              | XLOC_181179 | 283   | coding | noncoding | noncoding | noncoding |
| MSTRG.173127.2  | PNN          | XLOC_181202 | 5051  | coding | coding    | coding    | noncoding |
| MSTRG.173127.3  | PNN          | XLOC_181202 | 2408  | coding | coding    | coding    | coding    |
| MSTRG.173318.1  | LOC100288846 | XLOC_181205 | 2285  | coding | noncoding | noncoding | noncoding |

|                   |              |             |       |        |           |           |           |
|-------------------|--------------|-------------|-------|--------|-----------|-----------|-----------|
| MSTRG. 173318. 3  | LOC100288846 | XLOC_181205 | 2609  | coding | noncoding | noncoding | noncoding |
| MSTRG. 173318. 6  | MIA2         | XLOC_181205 | 4656  | coding | noncoding | noncoding | coding    |
| MSTRG. 173329. 1  | MIA2         | XLOC_181206 | 282   | coding | noncoding | noncoding | noncoding |
| MSTRG. 173504. 6  | PRPF39       | XLOC_181382 | 2766  | coding | noncoding | noncoding | noncoding |
| MSTRG. 173612. 1  | LRR1         | XLOC_181466 | 211   | coding | noncoding | noncoding | noncoding |
| MSTRG. 173612. 2  | LOC107987206 | XLOC_181466 | 286   | coding | noncoding | noncoding | noncoding |
| MSTRG. 173622. 3  | MGAT2        | XLOC_181469 | 1890  | coding | coding    | coding    | coding    |
| XM_024449554. 1   | ERO1A        | XLOC_181667 | 5414  | coding | coding    | coding    | coding    |
| MSTRG. 173971. 3  | PSMC6        | XLOC_181674 | 428   | coding | coding    | noncoding | noncoding |
| MSTRG. 173993. 2  | GNPNAT1      | XLOC_181676 | 8222  | coding | coding    | noncoding | noncoding |
| MSTRG. 174051. 2  | CGRRF1       | XLOC_181834 | 335   | coding | noncoding | noncoding | noncoding |
| MSTRG. 174153. 6  | FBXO34       | XLOC_181894 | 3299  | coding | noncoding | noncoding | noncoding |
| MSTRG. 174327. 2  | KTN1         | XLOC_181900 | 4565  | coding | noncoding | noncoding | coding    |
| MSTRG. 174327. 4  | KTN1         | XLOC_181900 | 4645  | coding | noncoding | noncoding | coding    |
| MSTRG. 174327. 7  | KTN1         | XLOC_181900 | 4426  | coding | noncoding | noncoding | coding    |
| MSTRG. 174327. 11 | KTN1         | XLOC_181900 | 2908  | coding | coding    | noncoding | coding    |
| MSTRG. 174511. 4  | PELI2        | XLOC_181924 | 10524 | coding | coding    | coding    | coding    |
| MSTRG. 174369. 1  |              | XLOC_181957 | 296   | coding | coding    | noncoding | noncoding |
| MSTRG. 174433. 1  |              | XLOC_181986 | 470   | coding | noncoding | noncoding | noncoding |
| MSTRG. 174666. 2  | KIAA0586     | XLOC_182033 | 2409  | coding | coding    | noncoding | noncoding |
| MSTRG. 174866. 1  | SLC38A6      | XLOC_182136 | 290   | coding | noncoding | noncoding | noncoding |
| MSTRG. 174882. 2  | SNAPC1       | XLOC_182174 | 1144  | coding | coding    | noncoding | noncoding |
| MSTRG. 175271. 6  | SYNE2        | XLOC_182235 | 21734 | coding | coding    | coding    | coding    |
| MSTRG. 175271. 11 | SYNE2        | XLOC_182235 | 7409  | coding | coding    | noncoding | noncoding |
| MSTRG. 175271. 12 | SYNE2        | XLOC_182235 | 21780 | coding | coding    | coding    | coding    |
| MSTRG. 175110. 26 | ZBTB25       | XLOC_182242 | 2746  | coding | coding    | coding    | noncoding |
| MSTRG. 175155. 6  | CHURC1       | XLOC_182255 | 1978  | coding | coding    | noncoding | noncoding |
| MSTRG. 175155. 9  | CHURC1       | XLOC_182255 | 482   | coding | coding    | noncoding | noncoding |
| MSTRG. 175952. 2  | RAD51B       | XLOC_182347 | 1188  | coding | coding    | noncoding | noncoding |
| MSTRG. 175447. 3  | SLC39A9      | XLOC_182415 | 5532  | coding | coding    | coding    | noncoding |
| MSTRG. 175461. 2  | SUSD6        | XLOC_182423 | 5902  | coding | coding    | coding    | noncoding |
| MSTRG. 175461. 4  | SUSD6        | XLOC_182423 | 6724  | coding | noncoding | noncoding | noncoding |
| MSTRG. 175461. 7  | SUSD6        | XLOC_182423 | 6429  | coding | noncoding | noncoding | noncoding |
| MSTRG. 175461. 11 | SUSD6        | XLOC_182423 | 5043  | coding | noncoding | noncoding | noncoding |
| MSTRG. 175653. 9  | PCNX1        | XLOC_182493 | 11880 | coding | coding    | coding    | noncoding |
| MSTRG. 175653. 18 | PCNX1        | XLOC_182493 | 7888  | coding | coding    | coding    | coding    |
| MSTRG. 176045. 29 | LOC102724015 | XLOC_182505 | 9031  | coding | coding    | coding    | noncoding |
| MSTRG. 176045. 28 | LOC102724015 | XLOC_182505 | 9028  | coding | coding    | coding    | noncoding |
| MSTRG. 176045. 32 | LOC102724015 | XLOC_182505 | 7905  | coding | coding    | coding    | noncoding |
| MSTRG. 176045. 35 | LOC102724015 | XLOC_182505 | 5733  | coding | coding    | coding    | noncoding |
| MSTRG. 175918. 3  | PSEN1        | XLOC_182540 | 6771  | coding | coding    | coding    | noncoding |
| MSTRG. 175918. 11 | PSEN1        | XLOC_182540 | 5922  | coding | coding    | coding    | noncoding |

|                 |              |             |      |        |           |           |           |
|-----------------|--------------|-------------|------|--------|-----------|-----------|-----------|
| MSTRG.175918.12 | PSEN1        | XLOC_182540 | 6051 | coding | coding    | coding    | noncoding |
| MSTRG.175942.1  | ACOT1        | XLOC_182557 | 245  | coding | noncoding | noncoding | noncoding |
| MSTRG.176154.9  | ALDH6A1      | XLOC_182582 | 1830 | coding | coding    | noncoding | noncoding |
| NM_002632.5     | PGF          | XLOC_182626 | 1911 | coding | coding    | coding    | coding    |
| MSTRG.177176.2  | TTC8         | XLOC_183076 | 279  | coding | noncoding | noncoding | noncoding |
| MSTRG.177293.2  | NRDE2        | XLOC_183158 | 1670 | coding | coding    | noncoding | noncoding |
| MSTRG.177505.6  | DGLUCY       | XLOC_183212 | 5322 | coding | coding    | noncoding | coding    |
| MSTRG.177572.9  | IFI27        | XLOC_183306 | 695  | coding | coding    | coding    | coding    |
| NM_001127703.2  | SERPINA1     | XLOC_183313 | 3438 | coding | coding    | coding    | coding    |
| NM_001080451.2  | SERPINA11    | XLOC_183321 | 1486 | coding | coding    | coding    | coding    |
| MSTRG.177885.5  | VRK1         | XLOC_183458 | 1112 | coding | coding    | noncoding | noncoding |
| MSTRG.177885.7  | VRK1         | XLOC_183458 | 2036 | coding | coding    | noncoding | noncoding |
| MSTRG.177885.8  | VRK1         | XLOC_183458 | 1242 | coding | coding    | noncoding | noncoding |
| NM_004184.4     | WARS         | XLOC_183682 | 2639 | coding | coding    | coding    | coding    |
| MSTRG.178580.6  | TECPR2       | XLOC_183767 | 3526 | coding | coding    | coding    | coding    |
| MSTRG.178580.9  | ANKRD9       | XLOC_183767 | 7242 | coding | noncoding | coding    | coding    |
| MSTRG.178673.4  | MARK3        | XLOC_183805 | 3613 | coding | coding    | coding    | noncoding |
| MSTRG.178730.2  | TDRD9        | XLOC_183838 | 1057 | coding | coding    | noncoding | noncoding |
| NM_005163.2     | AKT1         | XLOC_183872 | 2989 | coding | coding    | coding    | coding    |
| MSTRG.178912.1  | HERC2P3      | XLOC_183956 | 741  | coding | coding    | noncoding | noncoding |
| MSTRG.178916.4  | HERC2P3      | XLOC_183960 | 2863 | coding | coding    | noncoding | noncoding |
| MSTRG.179388.35 | UBE3A        | XLOC_184024 | 5419 | coding | coding    | noncoding | noncoding |
| MSTRG.179291.24 | FAN1         | XLOC_184229 | 4270 | coding | coding    | noncoding | noncoding |
| MSTRG.179291.25 | FAN1         | XLOC_184229 | 4236 | coding | coding    | coding    | noncoding |
| MSTRG.179600.4  | EMC4         | XLOC_184337 | 8598 | coding | coding    | coding    | coding    |
| MSTRG.179600.16 | SLC12A6      | XLOC_184337 | 6934 | coding | coding    | coding    | noncoding |
| MSTRG.179600.15 | SLC12A6      | XLOC_184337 | 7565 | coding | coding    | coding    | noncoding |
| MSTRG.179608.4  | GOLGA8A      | XLOC_184342 | 2691 | coding | noncoding | noncoding | coding    |
| MSTRG.179608.12 | GOLGA8B      | XLOC_184342 | 1527 | coding | noncoding | coding    | noncoding |
| MSTRG.179756.1  | DPH6         | XLOC_184392 | 262  | coding | coding    | noncoding | noncoding |
| MSTRG.180106.2  | BMF          | XLOC_184593 | 4773 | coding | coding    | coding    | noncoding |
| MSTRG.180106.4  | BMF          | XLOC_184593 | 3099 | coding | coding    | noncoding | noncoding |
| MSTRG.180169.5  | PLCB2        | XLOC_184603 | 4496 | coding | coding    | coding    | coding    |
| MSTRG.180440.2  | LOC105370795 | XLOC_184717 | 7352 | coding | coding    | coding    | noncoding |
| MSTRG.180440.4  | VPS39        | XLOC_184717 | 4927 | coding | coding    | coding    | noncoding |
| MSTRG.180440.12 | LOC105370795 | XLOC_184717 | 2839 | coding | coding    | noncoding | noncoding |
| NM_130798.2     | SNAP23       | XLOC_184732 | 2482 | coding | noncoding | coding    | coding    |
| MSTRG.180480.9  | SNAP23       | XLOC_184732 | 1022 | coding | coding    | noncoding | noncoding |
| MSTRG.180420.2  | UBR1         | XLOC_184752 | 7733 | coding | coding    | noncoding | noncoding |
| MSTRG.180432.52 | CCNDBP1      | XLOC_184754 | 3445 | coding | coding    | coding    | coding    |
| MSTRG.180550.1  |              | XLOC_184785 | 596  | coding | noncoding | noncoding | noncoding |
| NM_205850.3     | SLC24A5      | XLOC_184965 | 1879 | coding | coding    | coding    | coding    |

|                   |              |             |       |        |           |           |           |
|-------------------|--------------|-------------|-------|--------|-----------|-----------|-----------|
| MSTRG. 180982. 18 | SLC12A1      | XLOC_184977 | 2232  | coding | coding    | noncoding | noncoding |
| MSTRG. 180920. 2  | SECISBP2L    | XLOC_185023 | 8379  | coding | coding    | noncoding | coding    |
| MSTRG. 180920. 3  | SECISBP2L    | XLOC_185023 | 5403  | coding | coding    | noncoding | coding    |
| MSTRG. 181060. 1  |              | XLOC_185032 | 231   | coding | noncoding | noncoding | noncoding |
| MSTRG. 180943. 1  |              | XLOC_185080 | 215   | coding | coding    | noncoding | noncoding |
| MSTRG. 181033. 7  | ATP8B4       | XLOC_185089 | 3652  | coding | coding    | coding    | noncoding |
| NM_001165257. 1   | SCG3         | XLOC_185157 | 3257  | coding | coding    | coding    | coding    |
| MSTRG. 181186. 4  | LYSMD2       | XLOC_185157 | 1623  | coding | coding    | coding    | noncoding |
| MSTRG. 181456. 2  | MYO5A        | XLOC_185198 | 9147  | coding | coding    | coding    | coding    |
| MSTRG. 181502. 15 | CCPG1        | XLOC_185269 | 1770  | coding | noncoding | coding    | noncoding |
| MSTRG. 181511. 1  | DNAAF4-CCPG1 | XLOC_185274 | 277   | coding | noncoding | noncoding | noncoding |
| MSTRG. 181513. 1  | DNAAF4-CCPG1 | XLOC_185276 | 274   | coding | coding    | noncoding | noncoding |
| MSTRG. 181728. 1  | ADAM10       | XLOC_185473 | 13262 | coding | coding    | noncoding | noncoding |
| MSTRG. 181728. 4  | ADAM10       | XLOC_185473 | 10409 | coding | coding    | noncoding | noncoding |
| MSTRG. 181728. 13 | ADAM10       | XLOC_185473 | 2096  | coding | coding    | noncoding | noncoding |
| MSTRG. 181767. 3  | SLTM         | XLOC_185484 | 3787  | coding | coding    | coding    | noncoding |
| MSTRG. 181767. 8  | SLTM         | XLOC_185484 | 3235  | coding | coding    | coding    | noncoding |
| MSTRG. 181767. 9  | SLTM         | XLOC_185484 | 3091  | coding | noncoding | noncoding | noncoding |
| MSTRG. 182184. 8  | RORA-AS1     | XLOC_185541 | 9194  | coding | coding    | noncoding | noncoding |
| MSTRG. 182123. 5  | VPS13C       | XLOC_185593 | 7875  | coding | noncoding | noncoding | noncoding |
| XM_011522105. 3   | APH1B        | XLOC_185635 | 1148  | coding | coding    | coding    | coding    |
| NR_046342. 1      | USP3         | XLOC_185650 | 5722  | coding | coding    | coding    | coding    |
| NR_046341. 1      | USP3         | XLOC_185650 | 5759  | coding | coding    | coding    | coding    |
| NM_006537. 4      | USP3         | XLOC_185650 | 5517  | coding | coding    | coding    | coding    |
| MSTRG. 182336. 3  | HERC1        | XLOC_185658 | 2222  | coding | coding    | coding    | coding    |
| MSTRG. 182336. 6  | HERC1        | XLOC_185658 | 12142 | coding | coding    | coding    | coding    |
| MSTRG. 182336. 11 | HERC1        | XLOC_185658 | 9566  | coding | coding    | coding    | coding    |
| MSTRG. 182336. 15 | HERC1        | XLOC_185658 | 6804  | coding | coding    | coding    | coding    |
| XM_005254677. 3   | SNX22        | XLOC_185669 | 832   | coding | noncoding | coding    | coding    |
| MSTRG. 182439. 3  | CSNK1G1      | XLOC_185670 | 7487  | coding | coding    | noncoding | noncoding |
| MSTRG. 182493. 3  | LOC112268147 | XLOC_185736 | 1502  | coding | coding    | coding    | coding    |
| MSTRG. 182504. 4  | DPP8         | XLOC_185749 | 7290  | coding | coding    | coding    | noncoding |
| MSTRG. 182504. 5  | DPP8         | XLOC_185749 | 3796  | coding | coding    | coding    | noncoding |
| MSTRG. 182697. 2  | AAGAB        | XLOC_185825 | 1876  | coding | coding    | noncoding | noncoding |
| MSTRG. 182795. 11 | CALML4       | XLOC_185874 | 1215  | coding | noncoding | coding    | noncoding |
| MSTRG. 182981. 4  | TLE3         | XLOC_185950 | 14304 | coding | coding    | coding    | coding    |
| MSTRG. 183109. 4  | MYO9A        | XLOC_186011 | 2153  | coding | coding    | noncoding | noncoding |
| MSTRG. 183060. 4  | PARP6        | XLOC_186021 | 1235  | coding | noncoding | noncoding | noncoding |
| MSTRG. 183060. 7  | PARP6        | XLOC_186021 | 3311  | coding | coding    | noncoding | noncoding |
| MSTRG. 183069. 1  | HEXA-AS1     | XLOC_186027 | 2045  | coding | coding    | coding    | noncoding |
| MSTRG. 183262. 1  | REC114       | XLOC_186087 | 678   | coding | noncoding | noncoding | noncoding |
| MSTRG. 183526. 2  | SIN3A        | XLOC_186199 | 4929  | coding | coding    | noncoding | noncoding |

|                 |              |             |      |        |           |           |           |
|-----------------|--------------|-------------|------|--------|-----------|-----------|-----------|
| MSTRG.183729.4  | PEAK1        | XLOC_186248 | 3320 | coding | noncoding | coding    | coding    |
| MSTRG.183729.6  | PEAK1        | XLOC_186248 | 2525 | coding | noncoding | coding    | noncoding |
| NM_001330376.1  | TMED3        | XLOC_186345 | 3092 | coding | coding    | coding    | coding    |
| MSTRG.183984.5  | MTHFS        | XLOC_186396 | 1152 | coding | coding    | noncoding | noncoding |
| NM_004513.6     | IL16         | XLOC_186440 | 7315 | coding | coding    | coding    | coding    |
| MSTRG.184143.2  | EFL1         | XLOC_186489 | 2704 | coding | coding    | coding    | noncoding |
| NM_001321976.2  | MRPS11       | XLOC_186758 | 1700 | coding | noncoding | coding    | noncoding |
| NM_152924.5     | ABHD2        | XLOC_186784 | 8424 | coding | coding    | coding    | coding    |
| MSTRG.184720.8  | AP3S2        | XLOC_186824 | 694  | coding | coding    | noncoding | noncoding |
| NM_001130926.2  | MEF2A        | XLOC_187357 | 5530 | coding | coding    | coding    | coding    |
| MSTRG.185687.9  | LINS1        | XLOC_187463 | 2389 | coding | coding    | noncoding | noncoding |
| XM_011522015.3  | LRRK1        | XLOC_187480 | 9190 | coding | coding    | coding    | coding    |
| MSTRG.178955.1  | HERC2P2      | XLOC_187586 | 385  | coding | noncoding | noncoding | noncoding |
| MSTRG.179272.3  | LOC105376707 | XLOC_187795 | 5686 | coding | coding    | coding    | coding    |
| MSTRG.179277.1  | KLF13        | XLOC_187798 | 271  | coding | noncoding | noncoding | noncoding |
| MSTRG.179932.1  |              | XLOC_188088 | 612  | coding | noncoding | coding    | noncoding |
| MSTRG.179992.1  |              | XLOC_188114 | 601  | coding | coding    | noncoding | noncoding |
| MSTRG.180243.5  | SPINT1-AS1   | XLOC_188234 | 2203 | coding | coding    | coding    | coding    |
| MSTRG.180319.2  | RTF1         | XLOC_188262 | 4462 | coding | coding    | coding    | noncoding |
| MSTRG.180554.2  | PDIA3        | XLOC_188395 | 1869 | coding | coding    | coding    | noncoding |
| MSTRG.180591.3  | CTDSPL2      | XLOC_188422 | 2105 | coding | noncoding | noncoding | noncoding |
| MSTRG.180698.2  | SPATA5L1     | XLOC_188462 | 2349 | coding | coding    | coding    | noncoding |
| MSTRG.180769.9  | BLOC1S6      | XLOC_188472 | 1453 | coding | coding    | noncoding | noncoding |
| MSTRG.181009.2  | DUT          | XLOC_188549 | 1037 | coding | coding    | coding    | noncoding |
| MSTRG.181018.12 | USP50        | XLOC_188644 | 3728 | coding | coding    | noncoding | noncoding |
| NM_001306195.1  | ARPP19       | XLOC_188757 | 5344 | coding | coding    | noncoding | noncoding |
| MSTRG.181753.2  | MINDY2       | XLOC_189067 | 1671 | coding | coding    | coding    | noncoding |
| MSTRG.182100.2  | LACTB        | XLOC_189277 | 1881 | coding | coding    | coding    | noncoding |
| MSTRG.182796.3  | PIAS1        | XLOC_189531 | 7253 | coding | coding    | coding    | noncoding |
| MSTRG.182796.7  | PIAS1        | XLOC_189531 | 8093 | coding | coding    | coding    | noncoding |
| MSTRG.182737.1  |              | XLOC_189558 | 374  | coding | noncoding | noncoding | noncoding |
| MSTRG.183226.1  | NEO1         | XLOC_189827 | 256  | coding | noncoding | noncoding | noncoding |
| NM_017455.4     | NPTN         | XLOC_189844 | 2072 | coding | coding    | coding    | coding    |
| NM_001286742.1  | UBL7         | XLOC_189889 | 1548 | coding | coding    | coding    | coding    |
| MSTRG.183362.3  | ARID3B       | XLOC_189891 | 4671 | coding | coding    | coding    | coding    |
| NM_001145357.2  | SIN3A        | XLOC_189974 | 6636 | coding | coding    | coding    | coding    |
| NM_004390.4     | CTSH         | XLOC_190155 | 1505 | coding | coding    | coding    | coding    |
| MSTRG.183855.1  | TMED3        | XLOC_190198 | 1075 | coding | noncoding | noncoding | noncoding |
| MSTRG.183932.6  | ZFAND6       | XLOC_190258 | 6523 | coding | coding    | noncoding | noncoding |
| MSTRG.183932.7  | ZFAND6       | XLOC_190258 | 5590 | coding | coding    | noncoding | noncoding |
| MSTRG.183932.9  | ZFAND6       | XLOC_190258 | 6486 | coding | coding    | noncoding | noncoding |
| MSTRG.184100.4  | STARD5       | XLOC_190328 | 9761 | coding | coding    | coding    | noncoding |

|                 |              |             |       |        |           |           |           |
|-----------------|--------------|-------------|-------|--------|-----------|-----------|-----------|
| MSTRG.184355.4  | ZNF592       | XLOC_190465 | 9000  | coding | coding    | coding    | coding    |
| MSTRG.184546.4  | AKAP13       | XLOC_190487 | 4628  | coding | coding    | coding    | coding    |
| XM_011521637.3  | NTRK3        | XLOC_190544 | 4458  | coding | coding    | coding    | coding    |
| MSTRG.184592.3  | MRPS11       | XLOC_190566 | 788   | coding | coding    | coding    | coding    |
| MSTRG.184802.5  | FES          | XLOC_190692 | 2807  | coding | coding    | coding    | coding    |
| MSTRG.184840.2  | UNC45A       | XLOC_190697 | 3161  | coding | coding    | coding    | coding    |
| MSTRG.184840.4  | UNC45A       | XLOC_190697 | 1204  | coding | noncoding | coding    | noncoding |
| MSTRG.185043.1  | SLCO3A1      | XLOC_190735 | 14928 | coding | noncoding | noncoding | noncoding |
| MSTRG.185132.19 | CHD2         | XLOC_190763 | 6519  | coding | coding    | noncoding | coding    |
| MSTRG.185341.7  | MCTP2        | XLOC_190802 | 8556  | coding | coding    | coding    | noncoding |
| MSTRG.185341.13 | MCTP2        | XLOC_190802 | 8853  | coding | coding    | noncoding | noncoding |
| MSTRG.185520.5  | IRAIN        | XLOC_190913 | 1185  | coding | coding    | coding    | coding    |
| MSTRG.185440.3  | LRRC28       | XLOC_190939 | 1305  | coding | coding    | noncoding | noncoding |
| MSTRG.185456.11 | MEF2A        | XLOC_190949 | 1405  | coding | noncoding | noncoding | noncoding |
| NM_152334.3     | TARSL2       | XLOC_191059 | 3481  | coding | coding    | coding    | coding    |
| NM_001321551.1  | LOC100128108 | XLOC_191068 | 522   | coding | noncoding | noncoding | coding    |
| MSTRG.185805.7  | NPRL3        | XLOC_191096 | 2560  | coding | coding    | coding    | coding    |
| MSTRG.185816.2  | HBA1         | XLOC_191103 | 1060  | coding | coding    | coding    | coding    |
| MSTRG.185816.7  | HBA1         | XLOC_191103 | 990   | coding | coding    | coding    | coding    |
| MSTRG.185816.11 | HBA1         | XLOC_191103 | 873   | coding | coding    | coding    | coding    |
| MSTRG.185811.6  | LUC7L        | XLOC_191106 | 1378  | coding | coding    | coding    | noncoding |
| NM_005861.4     | STUB1        | XLOC_191142 | 1340  | coding | coding    | coding    | coding    |
| MSTRG.185963.1  | PRR25        | XLOC_191159 | 476   | coding | noncoding | noncoding | noncoding |
| MSTRG.186032.2  | C16orf91     | XLOC_191200 | 898   | coding | coding    | coding    | noncoding |
| MSTRG.186136.2  | RPS2         | XLOC_191250 | 911   | coding | coding    | noncoding | noncoding |
| XM_011522450.2  | RAB26        | XLOC_191278 | 2441  | coding | coding    | coding    | coding    |
| MSTRG.186330.1  | MEFV         | XLOC_191367 | 3293  | coding | coding    | coding    | coding    |
| MSTRG.186760.9  | USP7         | XLOC_191560 | 4215  | coding | coding    | coding    | noncoding |
| XR_933075.2     | LOC105371082 | XLOC_191640 | 1838  | coding | noncoding | coding    | noncoding |
| MSTRG.186889.6  | LITAF        | XLOC_191669 | 3589  | coding | coding    | noncoding | noncoding |
| MSTRG.186903.7  | TXNDC11      | XLOC_191674 | 1880  | coding | coding    | coding    | noncoding |
| MSTRG.186960.1  | RSL1D1       | XLOC_191678 | 2267  | coding | coding    | coding    | noncoding |
| NM_001145204.3  | SHISA9       | XLOC_191724 | 6749  | coding | coding    | coding    | coding    |
| MSTRG.187155.3  | PARN         | XLOC_191779 | 813   | coding | coding    | noncoding | noncoding |
| MSTRG.187212.3  | MARF1        | XLOC_191806 | 8096  | coding | coding    | coding    | noncoding |
| MSTRG.187212.7  | MARF1        | XLOC_191806 | 7966  | coding | coding    | coding    | noncoding |
| MSTRG.187212.9  | MARF1        | XLOC_191806 | 7647  | coding | coding    | coding    | noncoding |
| MSTRG.187212.10 | MARF1        | XLOC_191806 | 7647  | coding | coding    | coding    | noncoding |
| MSTRG.187322.5  | NOMO2        | XLOC_191865 | 4701  | coding | coding    | coding    | coding    |
| MSTRG.187384.3  | SMG1         | XLOC_191871 | 9427  | coding | coding    | coding    | coding    |
| MSTRG.187523.3  | THUMPD1      | XLOC_191955 | 4045  | coding | coding    | noncoding | noncoding |
| MSTRG.187528.1  | ACSM3        | XLOC_191960 | 311   | coding | noncoding | noncoding | noncoding |

|                   |                  |             |       |        |           |           |           |
|-------------------|------------------|-------------|-------|--------|-----------|-----------|-----------|
| MSTRG. 187580. 1  | NPIPB3           | XLOC_191985 | 1508  | coding | coding    | noncoding | noncoding |
| MSTRG. 187588. 2  | SMG1P3           | XLOC_191990 | 2250  | coding | coding    | noncoding | noncoding |
| MSTRG. 187784. 1  | ZKSCAN2          | XLOC_192115 | 399   | coding | coding    | noncoding | noncoding |
| MSTRG. 188051. 1  | IL27             | XLOC_192217 | 312   | coding | noncoding | coding    | noncoding |
| NM_138414. 3      | SGF29            | XLOC_192222 | 1159  | coding | coding    | coding    | coding    |
| MSTRG. 188258. 15 | SMG1P6           | XLOC_192287 | 2097  | coding | coding    | noncoding | coding    |
| MSTRG. 188258. 20 | SMG1P2           | XLOC_192287 | 1253  | coding | noncoding | noncoding | noncoding |
| MSTRG. 188258. 22 | SMG1P2           | XLOC_192287 | 958   | coding | noncoding | noncoding | coding    |
| MSTRG. 188258. 27 |                  | XLOC_192287 | 2749  | coding | coding    | noncoding | noncoding |
| MSTRG. 188258. 26 |                  | XLOC_192287 | 2837  | coding | coding    | noncoding | noncoding |
| MSTRG. 188188. 4  |                  | XLOC_192345 | 2975  | coding | coding    | noncoding | coding    |
| MSTRG. 188332. 1  | BCL7C            | XLOC_192391 | 278   | coding | noncoding | noncoding | noncoding |
| MSTRG. 188678. 2  | VPS35            | XLOC_192582 | 6165  | coding | coding    | noncoding | noncoding |
| MSTRG. 188884. 4  | ITFG1            | XLOC_192615 | 1271  | coding | coding    | coding    | noncoding |
| MSTRG. 188885. 1  | ITFG1-AS1        | XLOC_192616 | 403   | coding | coding    | noncoding | noncoding |
| MSTRG. 188914. 1  | PHKB             | XLOC_192638 | 312   | coding | noncoding | noncoding | noncoding |
| MSTRG. 188759. 8  | N4BP1            | XLOC_192657 | 3054  | coding | coding    | noncoding | coding    |
| MSTRG. 188944. 3  | LOC101927272     | XLOC_192725 | 5861  | coding | noncoding | coding    | noncoding |
| MSTRG. 188944. 8  | SNX20            | XLOC_192725 | 2310  | coding | noncoding | noncoding | noncoding |
| NM_022162. 3      | NOD2             | XLOC_192729 | 4675  | coding | coding    | coding    | coding    |
| XR_001751995. 2   | CHD9             | XLOC_192796 | 11755 | coding | coding    | coding    | coding    |
| MSTRG. 189304. 4  | LOC643802        | XLOC_192824 | 1463  | coding | coding    | noncoding | coding    |
| NM_017839. 5      | LPCAT2           | XLOC_192912 | 5313  | coding | coding    | coding    | coding    |
| MSTRG. 189441. 13 | FAM192A          | XLOC_193019 | 2209  | coding | coding    | noncoding | noncoding |
| XM_011522949. 2   | ADGRG5           | XLOC_193046 | 4350  | coding | coding    | coding    | coding    |
| MSTRG. 189521. 3  | USB1             | XLOC_193072 | 1230  | coding | noncoding | coding    | noncoding |
| NM_001126129. 2   | GINS3            | XLOC_193081 | 2317  | coding | coding    | coding    | coding    |
| NM_001160305. 2   | SETD6            | XLOC_193087 | 2985  | coding | coding    | coding    | coding    |
| MSTRG. 189605. 21 | CNOT1            | XLOC_193087 | 4757  | coding | coding    | coding    | coding    |
| MSTRG. 190093. 3  | TK2              | XLOC_193391 | 3569  | coding | coding    | coding    | noncoding |
| MSTRG. 190113. 3  | DYNC1LI2         | XLOC_193418 | 1934  | coding | noncoding | noncoding | noncoding |
| NM_025187. 5      | C16orf70         | XLOC_193444 | 2917  | coding | coding    | coding    | coding    |
| MSTRG. 190170. 2  | LRRC29           | XLOC_193460 | 367   | coding | noncoding | noncoding | noncoding |
| MSTRG. 190196. 2  | ZDHHC1           | XLOC_193479 | 1267  | coding | coding    | coding    | coding    |
| XM_011522874. 1   | CARMIL2          | XLOC_193492 | 4428  | coding | coding    | coding    | coding    |
| MSTRG. 190272. 3  | RANBP10          | XLOC_193499 | 5240  | coding | coding    | coding    | noncoding |
| NM_001322041. 2   | NUTF2            | XLOC_193505 | 2442  | coding | coding    | coding    | coding    |
| MSTRG. 190295. 5  | DPEP2            | XLOC_193528 | 3174  | coding | coding    | coding    | coding    |
| XM_011522979. 2   | PLA2G15          | XLOC_193550 | 2796  | coding | coding    | coding    | coding    |
| MSTRG. 190404. 2  | TERF2            | XLOC_193585 | 1452  | coding | coding    | noncoding | noncoding |
| MSTRG. 190446. 4  | PDXDC2P-NPIPB14P | XLOC_193631 | 1888  | coding | coding    | noncoding | noncoding |
| MSTRG. 190561. 2  | AARS             | XLOC_193646 | 3114  | coding | coding    | coding    | coding    |

|                 |           |             |       |        |           |           |           |
|-----------------|-----------|-------------|-------|--------|-----------|-----------|-----------|
| MSTRG.190572.3  | ST3GAL2   | XLOC_193650 | 4227  | coding | coding    | coding    | coding    |
| MSTRG.190534.4  | CMTR2     | XLOC_193679 | 3259  | coding | coding    | noncoding | noncoding |
| MSTRG.190595.6  | PHLPP2    | XLOC_193695 | 3074  | coding | coding    | coding    | noncoding |
| MSTRG.190595.10 | PHLPP2    | XLOC_193695 | 2618  | coding | coding    | coding    | noncoding |
| NM_020995.3     | HPR       | XLOC_193723 | 1242  | coding | coding    | coding    | coding    |
| MSTRG.190720.1  | LOC283922 | XLOC_193872 | 1950  | coding | coding    | coding    | noncoding |
| MSTRG.190730.3  | GLG1      | XLOC_193888 | 5189  | coding | coding    | coding    | coding    |
| NM_001100624.2  | CENPN     | XLOC_194147 | 4644  | coding | coding    | coding    | coding    |
| NM_198390.2     | CMIP      | XLOC_194168 | 4357  | coding | noncoding | coding    | coding    |
| MSTRG.191294.1  |           | XLOC_194241 | 336   | coding | noncoding | noncoding | noncoding |
| MSTRG.191603.2  | ZDHHC7    | XLOC_194355 | 5087  | coding | coding    | coding    | noncoding |
| NM_001318794.2  | COX4I1    | XLOC_194405 | 979   | coding | coding    | coding    | coding    |
| MSTRG.185749.1  | DDX11L10  | XLOC_194686 | 1159  | coding | coding    | noncoding | coding    |
| MSTRG.185815.2  | HBA1      | XLOC_194697 | 1089  | coding | coding    | coding    | noncoding |
| MSTRG.185815.10 | HBA1      | XLOC_194697 | 995   | coding | coding    | coding    | noncoding |
| MSTRG.185815.26 | HBA1      | XLOC_194697 | 1438  | coding | coding    | coding    | noncoding |
| MSTRG.186059.1  | TELO2     | XLOC_194799 | 275   | coding | noncoding | noncoding | noncoding |
| MSTRG.186596.26 | GLYR1     | XLOC_195042 | 13314 | coding | coding    | coding    | coding    |
| MSTRG.186596.31 | PPL       | XLOC_195042 | 12687 | coding | coding    | coding    | coding    |
| MSTRG.186841.1  | ATF7IP2   | XLOC_195196 | 2493  | coding | coding    | noncoding | coding    |
| MSTRG.186869.10 | CLEC16A   | XLOC_195209 | 3438  | coding | coding    | coding    | coding    |
| MSTRG.186869.13 | CLEC16A   | XLOC_195209 | 3399  | coding | coding    | coding    | coding    |
| MSTRG.186869.17 | CLEC16A   | XLOC_195209 | 2682  | coding | noncoding | coding    | coding    |
| NR_024320.1     | LITAF     | XLOC_195242 | 2535  | coding | coding    | coding    | coding    |
| XM_011522754.3  | LITAF     | XLOC_195242 | 2680  | coding | coding    | coding    | coding    |
| MSTRG.187076.2  | ERCC4     | XLOC_195334 | 782   | coding | noncoding | noncoding | noncoding |
| MSTRG.187215.3  | MYH11     | XLOC_195388 | 3343  | coding | coding    | coding    | coding    |
| MSTRG.187383.1  |           | XLOC_195449 | 286   | coding | noncoding | noncoding | noncoding |
| MSTRG.187350.1  |           | XLOC_195469 | 305   | coding | noncoding | noncoding | noncoding |
| MSTRG.187365.1  | SYT17     | XLOC_195481 | 277   | coding | coding    | noncoding | noncoding |
| MSTRG.187404.2  | CCP110    | XLOC_195495 | 4802  | coding | coding    | coding    | noncoding |
| MSTRG.187495.1  | ACSM1     | XLOC_195526 | 232   | coding | noncoding | noncoding | noncoding |
| MSTRG.187496.1  | ACSM1     | XLOC_195527 | 260   | coding | noncoding | noncoding | noncoding |
| MSTRG.187511.1  |           | XLOC_195540 | 622   | coding | noncoding | noncoding | noncoding |
| MSTRG.187548.6  | LYRM1     | XLOC_195553 | 1267  | coding | coding    | coding    | noncoding |
| MSTRG.187548.7  | LYRM1     | XLOC_195553 | 674   | coding | coding    | noncoding | noncoding |
| MSTRG.187631.3  | RRN3P3    | XLOC_195604 | 6097  | coding | coding    | coding    | noncoding |
| MSTRG.187631.5  | RRN3P3    | XLOC_195604 | 1766  | coding | coding    | coding    | noncoding |
| MSTRG.187631.9  | RRN3P3    | XLOC_195604 | 4649  | coding | coding    | coding    | noncoding |
| MSTRG.187684.3  | DCTN5     | XLOC_195635 | 2047  | coding | coding    | noncoding | noncoding |
| MSTRG.187741.2  | TNRC6A    | XLOC_195658 | 1828  | coding | noncoding | noncoding | coding    |
| MSTRG.187879.2  | IL4R      | XLOC_195726 | 5717  | coding | coding    | coding    | coding    |

|                 |              |             |       |        |           |           |           |
|-----------------|--------------|-------------|-------|--------|-----------|-----------|-----------|
| MSTRG.187879.4  | IL4R         | XLOC_195726 | 4538  | coding | coding    | coding    | noncoding |
| MSTRG.187978.2  | KIAA0556     | XLOC_195734 | 776   | coding | noncoding | noncoding | noncoding |
| XM_024450212.1  | XPO6         | XLOC_195757 | 4672  | coding | coding    | coding    | coding    |
| NM_001042432.1  | CLN3         | XLOC_195801 | 1913  | coding | coding    | coding    | coding    |
| XM_024450408.1  | SULT1A1      | XLOC_195811 | 1799  | coding | coding    | coding    | coding    |
| MSTRG.188206.3  | RRN3P2       | XLOC_195839 | 2144  | coding | coding    | noncoding | noncoding |
| MSTRG.188206.4  | RRN3P2       | XLOC_195839 | 788   | coding | coding    | noncoding | noncoding |
| NM_001031827.2  | BOLA2        | XLOC_195864 | 1017  | coding | coding    | coding    | coding    |
| MSTRG.188259.16 | BOLA2-SMG1P6 | XLOC_195864 | 1582  | coding | coding    | coding    | coding    |
| MSTRG.188143.4  | PPP4C        | XLOC_195909 | 1304  | coding | coding    | coding    | noncoding |
| XR_001751850.1  | SEPTIN1      | XLOC_195936 | 1641  | coding | coding    | coding    | coding    |
| NM_002773.5     | PRSS8        | XLOC_195991 | 1837  | coding | coding    | coding    | coding    |
| MSTRG.188585.10 | ZNF267       | XLOC_196043 | 7048  | coding | coding    | coding    | noncoding |
| MSTRG.188888.1  | ITFG1        | XLOC_196175 | 369   | coding | noncoding | noncoding | noncoding |
| NM_003031.4     | SIAH1        | XLOC_196199 | 2110  | coding | coding    | coding    | coding    |
| MSTRG.188878.2  | TENT4B       | XLOC_196273 | 3453  | coding | coding    | coding    | noncoding |
| MSTRG.188970.5  | BRD7         | XLOC_196275 | 13724 | coding | coding    | coding    | coding    |
| MSTRG.189047.5  | NOD2         | XLOC_196294 | 4143  | coding | coding    | coding    | coding    |
| MSTRG.189052.7  | LOC102724907 | XLOC_196295 | 1790  | coding | coding    | noncoding | noncoding |
| MSTRG.189052.12 | LOC102724907 | XLOC_196295 | 8414  | coding | coding    | noncoding | noncoding |
| MSTRG.189052.16 | LOC102724907 | XLOC_196295 | 2824  | coding | coding    | noncoding | coding    |
| MSTRG.189052.18 | LOC102724907 | XLOC_196295 | 8341  | coding | coding    | noncoding | noncoding |
| MSTRG.189273.3  | CHD9         | XLOC_196352 | 6740  | coding | coding    | noncoding | coding    |
| MSTRG.189273.5  | CHD9         | XLOC_196352 | 4252  | coding | coding    | coding    | coding    |
| MSTRG.189273.7  | CHD9         | XLOC_196352 | 11029 | coding | coding    | noncoding | coding    |
| MSTRG.189273.10 | CHD9         | XLOC_196352 | 4288  | coding | coding    | coding    | coding    |
| MSTRG.189273.15 | CHD9         | XLOC_196352 | 5315  | coding | coding    | noncoding | noncoding |
| MSTRG.189317.9  | AKTIP        | XLOC_196361 | 6298  | coding | coding    | coding    | coding    |
| MSTRG.190163.2  | E2F4         | XLOC_196831 | 2198  | coding | coding    | coding    | coding    |
| MSTRG.190358.2  | SLC7A6OS     | XLOC_196902 | 5671  | coding | coding    | coding    | noncoding |
| MSTRG.190345.1  | CDH1         | XLOC_196922 | 2045  | coding | coding    | coding    | noncoding |
| MSTRG.190420.12 | NFAT5        | XLOC_196945 | 9458  | coding | noncoding | noncoding | noncoding |
| MSTRG.190495.3  | SF3B3        | XLOC_196997 | 4082  | coding | coding    | noncoding | coding    |
| NM_001201553.1  | ZNF821       | XLOC_197043 | 1985  | coding | noncoding | coding    | coding    |
| MSTRG.190635.2  | HP           | XLOC_197054 | 1109  | coding | coding    | coding    | noncoding |
| MSTRG.190945.1  | ZNRF1        | XLOC_197174 | 286   | coding | noncoding | noncoding | noncoding |
| MSTRG.192386.1  | WWOX         | XLOC_197330 | 235   | coding | noncoding | noncoding | noncoding |
| MSTRG.191375.11 | PLCG2        | XLOC_197535 | 3247  | coding | coding    | coding    | noncoding |
| MSTRG.191479.1  | OSGIN1       | XLOC_197615 | 262   | coding | noncoding | noncoding | noncoding |
| MSTRG.191579.2  | KLHL36       | XLOC_197660 | 3984  | coding | coding    | coding    | coding    |
| MSTRG.191596.1  | CRISPLD2     | XLOC_197669 | 4562  | coding | coding    | coding    | coding    |
| NM_001282683.2  | FBXO31       | XLOC_197746 | 5732  | coding | noncoding | coding    | coding    |

|                 |              |             |       |        |           |           |           |
|-----------------|--------------|-------------|-------|--------|-----------|-----------|-----------|
| MSTRG.192193.18 | FAM157C      | XLOC_197936 | 4285  | coding | noncoding | coding    | coding    |
| MSTRG.192276.3  | PITPNA       | XLOC_198003 | 1250  | coding | coding    | noncoding | coding    |
| MSTRG.192764.3  | ZZEF1        | XLOC_198122 | 11227 | coding | coding    | coding    | coding    |
| NM_182538.5     | SPNS3        | XLOC_198129 | 1877  | coding | coding    | coding    | coding    |
| MSTRG.192862.3  | ENO3         | XLOC_198173 | 1548  | coding | coding    | coding    | noncoding |
| MSTRG.193023.1  | KIAA0753     | XLOC_198236 | 3593  | coding | coding    | noncoding | coding    |
| NM_001102614.1  | SLC35G6      | XLOC_198318 | 1195  | coding | noncoding | coding    | coding    |
| MSTRG.193169.3  | SAT2         | XLOC_198331 | 789   | coding | coding    | coding    | noncoding |
| MSTRG.193535.5  | GAS7         | XLOC_198483 | 3970  | coding | coding    | coding    | coding    |
| MSTRG.193893.4  | COX10-AS1    | XLOC_198683 | 1123  | coding | noncoding | noncoding | noncoding |
| MSTRG.194031.11 | TTC19        | XLOC_198776 | 15431 | coding | coding    | coding    | noncoding |
| NR_045022.1     | SNHG29       | XLOC_198791 | 1067  | coding | noncoding | noncoding | noncoding |
| MSTRG.194174.6  | CCDC144B     | XLOC_198907 | 923   | coding | coding    | coding    | noncoding |
| MSTRG.194293.1  | AKAP10       | XLOC_198963 | 5217  | coding | coding    | coding    | noncoding |
| MSTRG.194293.3  | AKAP10       | XLOC_198963 | 4357  | coding | coding    | coding    | noncoding |
| MSTRG.194694.1  | RAB34        | XLOC_199193 | 1272  | coding | coding    | coding    | noncoding |
| MSTRG.194923.2  | SSH2         | XLOC_199271 | 10481 | coding | coding    | coding    | coding    |
| MSTRG.195188.2  | EVI2A        | XLOC_199426 | 2883  | coding | coding    | noncoding | noncoding |
| MSTRG.195188.6  | EVI2A        | XLOC_199426 | 9596  | coding | coding    | noncoding | noncoding |
| XR_002958063.1  | ZNF207       | XLOC_199473 | 9430  | coding | noncoding | coding    | coding    |
| MSTRG.195457.4  | SLFN11       | XLOC_199635 | 4476  | coding | coding    | noncoding | noncoding |
| MSTRG.195452.1  |              | XLOC_199639 | 228   | coding | noncoding | noncoding | noncoding |
| MSTRG.195463.1  | SLFN12       | XLOC_199643 | 5379  | coding | coding    | noncoding | noncoding |
| MSTRG.195505.11 | SLFN12L      | XLOC_199644 | 3554  | coding | coding    | noncoding | noncoding |
| MSTRG.195527.4  | LOC107985033 | XLOC_199647 | 5807  | coding | coding    | noncoding | noncoding |
| NR_135479.1     | SNHG30       | XLOC_199648 | 825   | coding | noncoding | noncoding | noncoding |
| MSTRG.195643.7  | SYNRG        | XLOC_199710 | 7291  | coding | noncoding | coding    | coding    |
| MSTRG.195643.8  | SYNRG        | XLOC_199710 | 5414  | coding | noncoding | coding    | coding    |
| MSTRG.195643.12 | SYNRG        | XLOC_199710 | 4274  | coding | noncoding | coding    | coding    |
| XM_006722258.4  | LOC101929950 | XLOC_199721 | 916   | coding | coding    | coding    | coding    |
| MSTRG.195763.11 | ERBB2        | XLOC_199784 | 1376  | coding | coding    | noncoding | noncoding |
| MSTRG.195777.6  | IKZF3        | XLOC_199786 | 5551  | coding | noncoding | coding    | coding    |
| MSTRG.195777.7  | IKZF3        | XLOC_199786 | 3982  | coding | coding    | coding    | coding    |
| MSTRG.195777.8  | IKZF3        | XLOC_199786 | 3197  | coding | noncoding | coding    | coding    |
| XM_005257163.2  | CASC3        | XLOC_199803 | 3906  | coding | coding    | coding    | coding    |
| MSTRG.195838.1  | TOP2A        | XLOC_199815 | 206   | coding | coding    | noncoding | noncoding |
| MSTRG.195888.2  | SMARCE1      | XLOC_199835 | 3851  | coding | coding    | noncoding | noncoding |
| MSTRG.195909.5  | LOC107985072 | XLOC_199843 | 1329  | coding | coding    | coding    | noncoding |
| MSTRG.195973.5  | ACLY         | XLOC_199878 | 3852  | coding | coding    | coding    | coding    |
| MSTRG.195965.2  | DHX58        | XLOC_199884 | 2532  | coding | coding    | coding    | coding    |
| MSTRG.195965.3  | DHX58        | XLOC_199884 | 1466  | coding | coding    | coding    | noncoding |
| MSTRG.196031.5  | RETREG3      | XLOC_199912 | 3784  | coding | noncoding | coding    | noncoding |

|                 |              |             |       |        |           |           |           |
|-----------------|--------------|-------------|-------|--------|-----------|-----------|-----------|
| MSTRG.196257.5  | UBTF         | XLOC_200039 | 1130  | coding | coding    | coding    | noncoding |
| NM_002087.3     | GRN          | XLOC_200046 | 2346  | coding | coding    | coding    | coding    |
| MSTRG.196401.2  | KANSL1       | XLOC_200115 | 5331  | coding | coding    | coding    | noncoding |
| MSTRG.196478.1  | ARL17B       | XLOC_200121 | 870   | coding | noncoding | noncoding | noncoding |
| NM_002476.2     | MYL4         | XLOC_200140 | 855   | coding | noncoding | coding    | coding    |
| MSTRG.196439.1  | MRPL45P2     | XLOC_200148 | 1382  | coding | noncoding | noncoding | noncoding |
| XM_011524697.2  | SNX11        | XLOC_200189 | 2506  | coding | coding    | coding    | coding    |
| MSTRG.196689.16 | SKAP1        | XLOC_200192 | 21085 | coding | noncoding | coding    | coding    |
| XM_005257429.2  | ABI3         | XLOC_200241 | 1775  | coding | coding    | coding    | coding    |
| MSTRG.196652.3  | ZNF652       | XLOC_200247 | 5186  | coding | coding    | coding    | coding    |
| MSTRG.196675.3  | SPOP         | XLOC_200260 | 2874  | coding | coding    | noncoding | noncoding |
| MSTRG.196675.5  | SPOP         | XLOC_200260 | 2765  | coding | coding    | coding    | noncoding |
| MSTRG.196675.6  | SPOP         | XLOC_200260 | 1283  | coding | coding    | noncoding | noncoding |
| NM_001199900.1  | PDK2         | XLOC_200279 | 980   | coding | coding    | coding    | coding    |
| XR_002958056.1  | SGCA         | XLOC_200287 | 1990  | coding | coding    | coding    | coding    |
| NM_138962.4     | MSI2         | XLOC_200513 | 6379  | coding | coding    | coding    | coding    |
| MSTRG.197355.13 | SRSF1        | XLOC_200540 | 9642  | coding | coding    | noncoding | noncoding |
| XM_011525093.2  | RAD51C       | XLOC_200599 | 1574  | coding | coding    | coding    | coding    |
| MSTRG.197527.4  | TRIM37       | XLOC_200614 | 1450  | coding | noncoding | noncoding | noncoding |
| NM_001329399.2  | VMP1         | XLOC_200640 | 3595  | coding | noncoding | coding    | coding    |
| MSTRG.197793.20 | USP32        | XLOC_200661 | 2377  | coding | coding    | noncoding | noncoding |
| MSTRG.197541.2  | APPBP2       | XLOC_200667 | 4742  | coding | coding    | noncoding | noncoding |
| MSTRG.197597.1  | MED13        | XLOC_200747 | 11215 | coding | coding    | coding    | noncoding |
| NM_002401.5     | MAP3K3       | XLOC_200816 | 4752  | coding | coding    | coding    | coding    |
| MSTRG.197833.3  | STRADA       | XLOC_200820 | 1931  | coding | coding    | coding    | coding    |
| MSTRG.197891.2  | CCDC47       | XLOC_200822 | 3247  | coding | coding    | coding    | coding    |
| NM_001191029.2  | PRR29        | XLOC_200839 | 3055  | coding | coding    | coding    | coding    |
| MSTRG.197996.16 | MILR1        | XLOC_200850 | 7518  | coding | coding    | coding    | noncoding |
| MSTRG.197996.22 | DDX5         | XLOC_200850 | 6082  | coding | coding    | coding    | noncoding |
| MSTRG.197996.26 | CEP95        | XLOC_200850 | 4627  | coding | coding    | noncoding | noncoding |
| MSTRG.197996.25 | CEP95        | XLOC_200850 | 5746  | coding | coding    | noncoding | noncoding |
| MSTRG.198178.2  | PSMD12       | XLOC_200984 | 3569  | coding | coding    | coding    | noncoding |
| MSTRG.198283.5  | SLC16A6      | XLOC_201047 | 2612  | coding | coding    | coding    | coding    |
| MSTRG.198283.26 | ARSG         | XLOC_201047 | 3836  | coding | coding    | noncoding | noncoding |
| NM_001278433.1  | PRKAR1A      | XLOC_201048 | 4307  | coding | coding    | coding    | coding    |
| MSTRG.198621.1  | SLC39A11     | XLOC_201191 | 469   | coding | noncoding | noncoding | noncoding |
| MSTRG.198569.1  | LINC00469    | XLOC_201235 | 208   | coding | coding    | noncoding | noncoding |
| MSTRG.198668.7  | LOC107985074 | XLOC_201271 | 1959  | coding | coding    | coding    | noncoding |
| NM_001545.3     | MRPL58       | XLOC_201304 | 894   | coding | coding    | coding    | coding    |
| XR_002958068.1  | ARMC7        | XLOC_201310 | 2291  | coding | coding    | coding    | noncoding |
| MSTRG.198772.5  | GGA3         | XLOC_201316 | 2001  | coding | coding    | coding    | noncoding |
| MSTRG.198855.3  | ZACN         | XLOC_201364 | 4797  | coding | coding    | coding    | coding    |

|                 |              |             |       |        |           |           |           |
|-----------------|--------------|-------------|-------|--------|-----------|-----------|-----------|
| MSTRG.198855.5  | ZACN         | XLOC_201364 | 2969  | coding | coding    | coding    | coding    |
| MSTRG.198904.7  | RHBDF2       | XLOC_201384 | 3169  | coding | coding    | coding    | coding    |
| NR_038109.1     | SNHG16       | XLOC_201396 | 2534  | coding | noncoding | noncoding | noncoding |
| MSTRG.198964.29 | MFSD11       | XLOC_201412 | 4445  | coding | coding    | coding    | coding    |
| MSTRG.199092.1  | AFMID        | XLOC_201495 | 533   | coding | coding    | noncoding | coding    |
| XM_005257546.4  | RNF213       | XLOC_201588 | 17680 | coding | coding    | noncoding | coding    |
| MSTRG.199508.2  | MAFG         | XLOC_201699 | 1488  | coding | coding    | coding    | coding    |
| MSTRG.199564.3  | CD7          | XLOC_201743 | 1267  | coding | coding    | coding    | coding    |
| NM_001004431.3  | METRNL       | XLOC_201775 | 1690  | coding | noncoding | coding    | coding    |
| MSTRG.192624.4  | PAFAH1B1     | XLOC_201869 | 5327  | coding | coding    | coding    | noncoding |
| MSTRG.192859.4  | SLC25A11     | XLOC_201988 | 3409  | coding | coding    | coding    | coding    |
| MSTRG.192859.10 | SLC25A11     | XLOC_201988 | 2826  | coding | coding    | coding    | coding    |
| MSTRG.192968.1  | NUP88        | XLOC_202010 | 9859  | coding | coding    | coding    | coding    |
| MSTRG.193034.1  | ALOX15P1     | XLOC_202072 | 510   | coding | coding    | noncoding | noncoding |
| NM_177550.4     | SLC13A5      | XLOC_202078 | 3289  | coding | coding    | coding    | coding    |
| MSTRG.192999.3  | XAF1         | XLOC_202081 | 4629  | coding | coding    | coding    | coding    |
| MSTRG.192999.8  | XAF1         | XLOC_202081 | 2698  | coding | coding    | coding    | coding    |
| MSTRG.193084.1  | ASGR2        | XLOC_202117 | 248   | coding | noncoding | noncoding | noncoding |
| MSTRG.193106.2  | LOC105371512 | XLOC_202122 | 4755  | coding | noncoding | coding    | noncoding |
| MSTRG.193118.19 | DLG4         | XLOC_202124 | 2597  | coding | coding    | coding    | coding    |
| MSTRG.193147.2  | POLR2A       | XLOC_202142 | 2614  | coding | coding    | coding    | coding    |
| MSTRG.193155.2  | TNFSF13      | XLOC_202145 | 2056  | coding | coding    | noncoding | coding    |
| MSTRG.193260.4  | CHD3         | XLOC_202175 | 1954  | coding | coding    | coding    | coding    |
| XR_002958073.1  | CTC1         | XLOC_202208 | 7300  | coding | coding    | coding    | coding    |
| MSTRG.193898.4  | COX10        | XLOC_202425 | 300   | coding | noncoding | noncoding | noncoding |
| MSTRG.194013.2  | NT5M         | XLOC_202541 | 1466  | coding | coding    | coding    | noncoding |
| MSTRG.194271.3  | MFAP4        | XLOC_202679 | 513   | coding | coding    | coding    | coding    |
| NM_152908.4     | SLC47A2      | XLOC_202694 | 2232  | coding | coding    | coding    | coding    |
| MSTRG.194384.2  | DHRS7B       | XLOC_202761 | 1234  | coding | coding    | noncoding | noncoding |
| MSTRG.194598.2  | KSR1         | XLOC_202846 | 664   | coding | coding    | coding    | noncoding |
| NM_005148.3     | UNC119       | XLOC_202897 | 1384  | coding | coding    | coding    | coding    |
| NM_001033561.2  | PHF12        | XLOC_202931 | 4506  | coding | coding    | coding    | coding    |
| MSTRG.194840.4  | TAOK1        | XLOC_202968 | 10966 | coding | coding    | coding    | noncoding |
| MSTRG.194840.9  | TAOK1        | XLOC_202968 | 11726 | coding | noncoding | noncoding | noncoding |
| MSTRG.194840.10 | TAOK1        | XLOC_202968 | 5867  | coding | noncoding | noncoding | noncoding |
| MSTRG.195117.2  | SUZ12P1      | XLOC_203069 | 817   | coding | noncoding | noncoding | noncoding |
| MSTRG.195140.2  | ADAP2        | XLOC_203077 | 2398  | coding | coding    | coding    | noncoding |
| MSTRG.195156.1  | LOC107984974 | XLOC_203087 | 272   | coding | noncoding | noncoding | noncoding |
| MSTRG.195441.1  |              | XLOC_203244 | 251   | coding | coding    | noncoding | noncoding |
| MSTRG.195538.7  | AP2B1        | XLOC_203284 | 5842  | coding | coding    | coding    | coding    |
| MSTRG.195620.1  | TBC1D3D      | XLOC_203347 | 254   | coding | noncoding | coding    | noncoding |
| MSTRG.195748.7  | CDK12        | XLOC_203412 | 4854  | coding | coding    | coding    | coding    |

|                 |              |             |       |        |           |           |           |
|-----------------|--------------|-------------|-------|--------|-----------|-----------|-----------|
| NM_021724.5     | NR1D1        | XLOC_203453 | 2630  | coding | coding    | coding    | coding    |
| MSTRG.196002.5  | ATP6V0A1     | XLOC_203617 | 421   | coding | coding    | noncoding | noncoding |
| MSTRG.196035.4  | PSMC3IP      | XLOC_203622 | 2263  | coding | coding    | noncoding | noncoding |
| MSTRG.196155.3  | NBR2         | XLOC_203664 | 1239  | coding | coding    | noncoding | noncoding |
| MSTRG.196485.5  | NSF          | XLOC_203828 | 4709  | coding | coding    | coding    | coding    |
| MSTRG.196485.9  | NSF          | XLOC_203828 | 1029  | coding | coding    | noncoding | noncoding |
| MSTRG.196431.1  | EFCAB13      | XLOC_203863 | 256   | coding | noncoding | noncoding | noncoding |
| MSTRG.196536.2  | PNPO         | XLOC_203896 | 1465  | coding | coding    | coding    | coding    |
| MSTRG.196554.4  | NFE2L1       | XLOC_203902 | 3340  | coding | coding    | coding    | coding    |
| MSTRG.196554.3  | NFE2L1       | XLOC_203902 | 4654  | coding | coding    | coding    | coding    |
| MSTRG.196554.5  | NFE2L1       | XLOC_203902 | 3228  | coding | coding    | coding    | coding    |
| MSTRG.196631.4  | UBE2Z        | XLOC_204029 | 2534  | coding | noncoding | noncoding | noncoding |
| MSTRG.196843.1  | PPP1R9B      | XLOC_204100 | 444   | coding | noncoding | noncoding | noncoding |
| NM_001243877.1  | TOB1         | XLOC_204143 | 2224  | coding | coding    | coding    | coding    |
| MSTRG.197242.5  | DGKE         | XLOC_204347 | 639   | coding | coding    | noncoding | noncoding |
| MSTRG.197426.5  | SUPT4H1      | XLOC_204433 | 1756  | coding | noncoding | coding    | noncoding |
| MSTRG.197457.2  | PRR11        | XLOC_204463 | 1194  | coding | noncoding | noncoding | noncoding |
| MSTRG.197794.3  | CA4          | XLOC_204502 | 1048  | coding | coding    | coding    | noncoding |
| MSTRG.197680.5  | BCAS3        | XLOC_204541 | 2838  | coding | coding    | coding    | noncoding |
| XR_001752965.1  | LOC105371857 | XLOC_204610 | 1149  | coding | noncoding | noncoding | noncoding |
| MSTRG.197673.3  | DCAF7        | XLOC_204625 | 1434  | coding | noncoding | noncoding | coding    |
| MSTRG.197997.2  | MILR1        | XLOC_204673 | 1485  | coding | coding    | noncoding | noncoding |
| MSTRG.198232.11 | BPTF         | XLOC_204800 | 9150  | coding | coding    | coding    | noncoding |
| MSTRG.198232.10 | BPTF         | XLOC_204800 | 10142 | coding | coding    | coding    | noncoding |
| MSTRG.198255.4  | LINC00674    | XLOC_204805 | 6287  | coding | coding    | coding    | coding    |
| MSTRG.198525.1  | FAM104A      | XLOC_204958 | 4693  | coding | coding    | coding    | coding    |
| XM_005257182.2  | CDC42EP4     | XLOC_204960 | 3416  | coding | coding    | coding    | coding    |
| MSTRG.198770.19 | MIF4GD       | XLOC_205048 | 2767  | coding | coding    | coding    | coding    |
| XM_005257822.4  | RECQL5       | XLOC_205086 | 3089  | coding | coding    | coding    | coding    |
| MSTRG.199026.14 | SEC14L1      | XLOC_205186 | 5320  | coding | coding    | coding    | coding    |
| MSTRG.199026.18 | SEC14L1      | XLOC_205186 | 4954  | coding | coding    | coding    | coding    |
| MSTRG.199026.21 | SEC14L1      | XLOC_205186 | 4840  | coding | coding    | coding    | coding    |
| MSTRG.199026.20 | SEC14L1      | XLOC_205186 | 4944  | coding | coding    | coding    | coding    |
| MSTRG.199026.24 | SEC14L1      | XLOC_205186 | 4773  | coding | coding    | coding    | coding    |
| MSTRG.199026.23 | SEC14L1      | XLOC_205186 | 4812  | coding | coding    | coding    | coding    |
| MSTRG.199094.2  | AFMID        | XLOC_205236 | 474   | coding | noncoding | noncoding | noncoding |
| MSTRG.199330.4  | LOC100294362 | XLOC_205342 | 18824 | coding | coding    | coding    | coding    |
| MSTRG.199533.4  | GPS1         | XLOC_205454 | 1828  | coding | coding    | coding    | coding    |
| MSTRG.199533.5  | GPS1         | XLOC_205454 | 1796  | coding | coding    | coding    | coding    |
| NM_022156.5     | DUS1L        | XLOC_205454 | 2233  | coding | coding    | coding    | coding    |
| MSTRG.199570.4  | CSNK1D       | XLOC_205462 | 1777  | coding | coding    | coding    | coding    |
| NR_110578.2     | CSNK1D       | XLOC_205462 | 3572  | coding | noncoding | coding    | coding    |

|                 |                |             |       |        |           |           |           |
|-----------------|----------------|-------------|-------|--------|-----------|-----------|-----------|
| XR_933922.3     | CSNK1D         | XLOC_205462 | 4014  | coding | coding    | coding    | coding    |
| XR_002957961.1  | CSNK1D         | XLOC_205462 | 4259  | coding | coding    | coding    | coding    |
| XM_017025073.2  | CYBC1          | XLOC_205474 | 3102  | coding | coding    | coding    | coding    |
| XM_024451242.1  | TYMS           | XLOC_205535 | 1176  | coding | coding    | coding    | coding    |
| MSTRG.199836.7  | LPIN2          | XLOC_205602 | 2085  | coding | coding    | coding    | noncoding |
| XM_017025958.1  | TGIF1          | XLOC_205635 | 1940  | coding | coding    | coding    | coding    |
| MSTRG.200305.8  | PPP4R1         | XLOC_205893 | 4012  | coding | coding    | coding    | noncoding |
| MSTRG.200612.1  | CEP76          | XLOC_206047 | 554   | coding | noncoding | coding    | noncoding |
| MSTRG.200618.1  |                | XLOC_206065 | 308   | coding | noncoding | noncoding | noncoding |
| MSTRG.200870.2  | ROCK1          | XLOC_206211 | 5262  | coding | coding    | coding    | noncoding |
| MSTRG.200870.3  | ROCK1          | XLOC_206211 | 5375  | coding | coding    | coding    | noncoding |
| MSTRG.200884.2  | ROCK1          | XLOC_206212 | 6387  | coding | noncoding | noncoding | noncoding |
| MSTRG.200953.2  | ABHD3          | XLOC_206230 | 3191  | coding | noncoding | noncoding | noncoding |
| MSTRG.201111.12 | NPC1           | XLOC_206317 | 4170  | coding | coding    | coding    | coding    |
| MSTRG.201534.2  | DSC2           | XLOC_206563 | 3950  | coding | coding    | noncoding | noncoding |
| MSTRG.201570.4  | TRAPPC8        | XLOC_206597 | 5041  | coding | coding    | coding    | coding    |
| MSTRG.201776.6  | LOC107985139   | XLOC_206726 | 9171  | coding | coding    | noncoding | noncoding |
| XR_002958176.1  | PIK3C3         | XLOC_206912 | 6400  | coding | coding    | coding    | coding    |
| MSTRG.202127.1  |                | XLOC_206959 | 325   | coding | noncoding | noncoding | noncoding |
| XM_024451149.1  | SETBP1         | XLOC_206999 | 10177 | coding | noncoding | coding    | coding    |
| MSTRG.202413.5  | EPG5           | XLOC_207070 | 2769  | coding | noncoding | noncoding | noncoding |
| MSTRG.202605.4  | PIAS2          | XLOC_207136 | 723   | coding | coding    | noncoding | noncoding |
| MSTRG.202668.4  | SMAD2          | XLOC_207160 | 3494  | coding | coding    | noncoding | noncoding |
| MSTRG.202730.3  | RPL17-C18orf32 | XLOC_207200 | 937   | coding | coding    | noncoding | noncoding |
| MSTRG.202730.6  | RPL17-C18orf32 | XLOC_207200 | 665   | coding | coding    | noncoding | noncoding |
| MSTRG.203140.4  | TCF4           | XLOC_207368 | 2274  | coding | noncoding | noncoding | noncoding |
| MSTRG.203503.2  | RNF152         | XLOC_207604 | 589   | coding | coding    | coding    | noncoding |
| MSTRG.203891.8  | BCL2           | XLOC_207685 | 5002  | coding | coding    | coding    | noncoding |
| MSTRG.204090.9  | CD226          | XLOC_207868 | 4057  | coding | coding    | noncoding | noncoding |
| MSTRG.204564.6  | ZNF407         | XLOC_208043 | 4339  | coding | noncoding | coding    | noncoding |
| MSTRG.204527.6  | ZNF516         | XLOC_208180 | 5346  | coding | coding    | coding    | coding    |
| MSTRG.204527.7  | ZNF516         | XLOC_208180 | 5238  | coding | coding    | coding    | coding    |
| MSTRG.204734.11 | MBP            | XLOC_208218 | 41498 | coding | coding    | noncoding | coding    |
| MSTRG.204734.15 | MBP            | XLOC_208218 | 6230  | coding | noncoding | coding    | noncoding |
| MSTRG.204798.3  | KCNG2          | XLOC_208293 | 8929  | coding | coding    | coding    | coding    |
| MSTRG.204811.1  | SLC66A2        | XLOC_208294 | 408   | coding | noncoding | noncoding | noncoding |
| MSTRG.204825.1  | TXNL4A         | XLOC_208304 | 411   | coding | coding    | noncoding | noncoding |
| MSTRG.199824.4  | SMCHD1         | XLOC_208402 | 7423  | coding | coding    | coding    | noncoding |
| MSTRG.199824.2  | SMCHD1         | XLOC_208402 | 11031 | coding | coding    | coding    | coding    |
| MSTRG.199824.7  | SMCHD1         | XLOC_208402 | 6127  | coding | coding    | coding    | noncoding |
| MSTRG.199931.3  | LINC00667      | XLOC_208502 | 1197  | coding | coding    | noncoding | noncoding |
| MSTRG.200337.2  | PTPRM          | XLOC_208593 | 1962  | coding | coding    | coding    | noncoding |

|                 |           |             |       |        |           |           |           |
|-----------------|-----------|-------------|-------|--------|-----------|-----------|-----------|
| NR_052003.1     | PPP4R1    | XLOC_208633 | 3941  | coding | coding    | coding    | coding    |
| MSTRG.200388.6  | VAPA      | XLOC_208653 | 4363  | coding | coding    | coding    | noncoding |
| NM_023075.6     | MPPE1     | XLOC_208726 | 3330  | coding | coding    | coding    | coding    |
| MSTRG.200631.9  | CEP192    | XLOC_208771 | 8000  | coding | noncoding | coding    | noncoding |
| MSTRG.200918.1  | LDLRAD4   | XLOC_208799 | 1008  | coding | noncoding | noncoding | coding    |
| MSTRG.200804.1  |           | XLOC_208885 | 289   | coding | coding    | noncoding | noncoding |
| MSTRG.201041.4  | RBBP8     | XLOC_208974 | 2929  | coding | coding    | noncoding | noncoding |
| MSTRG.201796.1  | ZSCAN30   | XLOC_209306 | 1796  | coding | coding    | noncoding | noncoding |
| MSTRG.202315.1  | KIAA1328  | XLOC_209383 | 317   | coding | noncoding | noncoding | noncoding |
| MSTRG.202188.2  | PIK3C3    | XLOC_209518 | 10176 | coding | coding    | noncoding | noncoding |
| MSTRG.202222.1  |           | XLOC_209533 | 226   | coding | coding    | noncoding | noncoding |
| MSTRG.202246.1  | LINC00907 | XLOC_209554 | 236   | coding | noncoding | noncoding | noncoding |
| NM_001199344.2  | RPL17     | XLOC_209830 | 796   | coding | coding    | coding    | coding    |
| NM_001199341.2  | RPL17     | XLOC_209830 | 813   | coding | coding    | coding    | coding    |
| MSTRG.203217.2  | WDR7      | XLOC_210041 | 4725  | coding | coding    | coding    | noncoding |
| XM_017025614.2  | FECH      | XLOC_210065 | 2406  | coding | coding    | coding    | coding    |
| NM_052947.4     | ALPK2     | XLOC_210100 | 7437  | coding | coding    | coding    | coding    |
| MSTRG.203406.3  | PMAIP1    | XLOC_210145 | 769   | coding | coding    | coding    | coding    |
| MSTRG.203636.4  | RELCH     | XLOC_210210 | 4347  | coding | noncoding | coding    | noncoding |
| MSTRG.203636.12 | RELCH     | XLOC_210210 | 1038  | coding | noncoding | noncoding | noncoding |
| MSTRG.203553.1  |           | XLOC_210220 | 305   | coding | noncoding | noncoding | noncoding |
| MSTRG.203560.8  | ZCCHC2    | XLOC_210223 | 8894  | coding | coding    | coding    | noncoding |
| MSTRG.203986.1  | CCDC102B  | XLOC_210463 | 317   | coding | noncoding | noncoding | noncoding |
| MSTRG.204030.1  | DOK6      | XLOC_210479 | 452   | coding | coding    | noncoding | noncoding |
| MSTRG.204138.1  | GTSCR1    | XLOC_210553 | 330   | coding | noncoding | noncoding | noncoding |
| MSTRG.204392.3  | CNDP2     | XLOC_210664 | 2882  | coding | coding    | coding    | coding    |
| MSTRG.204454.2  | TSHZ1     | XLOC_210689 | 1006  | coding | noncoding | coding    | noncoding |
| MSTRG.204693.4  | ZNF236    | XLOC_210773 | 2599  | coding | coding    | coding    | noncoding |
| MSTRG.204844.2  | ADNP2     | XLOC_210889 | 986   | coding | noncoding | noncoding | noncoding |
| NM_001303501.2  | CNN2      | XLOC_210980 | 2212  | coding | coding    | coding    | coding    |
| NM_001687.5     | ATP5F1D   | XLOC_210991 | 995   | coding | coding    | coding    | coding    |
| NM_001300829.2  | CIRBP     | XLOC_210997 | 3346  | coding | coding    | coding    | coding    |
| MSTRG.205314.1  | GNA15     | XLOC_211138 | 386   | coding | noncoding | noncoding | noncoding |
| MSTRG.205851.1  | CLEC4G    | XLOC_211438 | 508   | coding | coding    | coding    | noncoding |
| MSTRG.206201.1  |           | XLOC_211621 | 238   | coding | noncoding | noncoding | noncoding |
| MSTRG.206207.2  | ATG4D     | XLOC_211633 | 4686  | coding | coding    | coding    | coding    |
| MSTRG.206334.2  | ACP5      | XLOC_211697 | 1481  | coding | coding    | coding    | noncoding |
| MSTRG.206475.1  | ZNF564    | XLOC_211768 | 1369  | coding | coding    | noncoding | noncoding |
| MSTRG.206492.2  | MAN2B1    | XLOC_211777 | 3067  | coding | coding    | coding    | coding    |
| MSTRG.206497.3  | TNPO2     | XLOC_211782 | 2333  | coding | coding    | coding    | coding    |
| MSTRG.206701.49 | ZNF333    | XLOC_211871 | 7400  | coding | coding    | coding    | noncoding |
| XM_024451681.1  | TPM4      | XLOC_211942 | 2286  | coding | coding    | coding    | coding    |

|                   |              |             |      |        |           |           |           |
|-------------------|--------------|-------------|------|--------|-----------|-----------|-----------|
| MSTRG. 206955. 1  | ANO8         | XLOC_212031 | 271  | coding | noncoding | noncoding | noncoding |
| MSTRG. 207065. 2  | LSM4         | XLOC_212085 | 1194 | coding | coding    | coding    | noncoding |
| MSTRG. 207649. 5  | ZNF91        | XLOC_212374 | 4768 | coding | coding    | noncoding | noncoding |
| MSTRG. 207617. 1  |              | XLOC_212411 | 404  | coding | noncoding | noncoding | noncoding |
| MSTRG. 207802. 5  | LOC101927151 | XLOC_212441 | 3081 | coding | noncoding | coding    | noncoding |
| MSTRG. 208221. 1  | SCGB1B2P     | XLOC_212713 | 378  | coding | noncoding | noncoding | noncoding |
| NM_001242597. 2   | TMEM147      | XLOC_212810 | 939  | coding | coding    | coding    | coding    |
| MSTRG. 208386. 4  | U2AF1L4      | XLOC_212822 | 994  | coding | coding    | noncoding | noncoding |
| NM_001302632. 2   | CAPNS1       | XLOC_212849 | 1533 | coding | coding    | coding    | coding    |
| MSTRG. 208474. 2  | ZNF529-AS1   | XLOC_212870 | 3783 | coding | coding    | noncoding | noncoding |
| MSTRG. 208585. 1  | ZNF829       | XLOC_212900 | 665  | coding | coding    | noncoding | noncoding |
| NM_021913. 5      | AXL          | XLOC_213143 | 4717 | coding | coding    | coding    | coding    |
| MSTRG. 209065. 1  | BCKDHA       | XLOC_213162 | 3672 | coding | coding    | coding    | coding    |
| MSTRG. 209239. 1  | CEACAM8      | XLOC_213274 | 1427 | coding | coding    | noncoding | noncoding |
| MSTRG. 209239. 2  | CEACAM8      | XLOC_213274 | 1027 | coding | coding    | noncoding | noncoding |
| MSTRG. 209358. 6  | PLAUR        | XLOC_213326 | 1403 | coding | coding    | coding    | coding    |
| NM_001294. 4      | CLPTM1       | XLOC_213432 | 2470 | coding | coding    | coding    | coding    |
| NM_001329921. 1   | CALM3        | XLOC_213513 | 2179 | coding | coding    | coding    | coding    |
| XM_005259190. 5   | C5AR1        | XLOC_213553 | 2263 | coding | coding    | coding    | coding    |
| MSTRG. 209963. 4  | CARD8-AS1    | XLOC_213614 | 7064 | coding | coding    | coding    | noncoding |
| MSTRG. 209963. 11 | CARD8-AS1    | XLOC_213614 | 4449 | coding | coding    | coding    | coding    |
| MSTRG. 209963. 14 | CARD8-AS1    | XLOC_213614 | 6397 | coding | coding    | coding    | noncoding |
| MSTRG. 209963. 17 | CARD8-AS1    | XLOC_213614 | 4225 | coding | coding    | coding    | noncoding |
| NM_001204502. 2   | FLT3LG       | XLOC_213705 | 1101 | coding | coding    | coding    | coding    |
| MSTRG. 210114. 7  | BCL2L12      | XLOC_213726 | 2300 | coding | coding    | coding    | coding    |
| MSTRG. 210140. 3  | MIR4751      | XLOC_213748 | 3377 | coding | coding    | coding    | coding    |
| MSTRG. 210264. 1  | CTU1         | XLOC_213810 | 223  | coding | noncoding | noncoding | noncoding |
| MSTRG. 210362. 3  | FPR1         | XLOC_213861 | 3521 | coding | coding    | coding    | coding    |
| MSTRG. 210382. 3  | ZNF350       | XLOC_213873 | 2179 | coding | coding    | noncoding | noncoding |
| MSTRG. 210558. 1  | ZNF611       | XLOC_213924 | 3536 | coding | coding    | noncoding | noncoding |
| NM_031895. 6      | CACNG8       | XLOC_214039 | 8850 | coding | coding    | coding    | coding    |
| NM_001278428. 3   | LILRB4       | XLOC_214071 | 3902 | coding | coding    | coding    | coding    |
| MSTRG. 210654. 2  | TNNT1        | XLOC_214087 | 325  | coding | noncoding | noncoding | noncoding |
| MSTRG. 210672. 3  | TMEM86B      | XLOC_214093 | 1029 | coding | coding    | coding    | coding    |
| MSTRG. 210699. 2  | ISOC2        | XLOC_214110 | 671  | coding | coding    | coding    | noncoding |
| MSTRG. 211000. 2  | ZNF671       | XLOC_214280 | 2584 | coding | coding    | coding    | coding    |
| MSTRG. 204975. 4  | PLPPR3       | XLOC_214420 | 3547 | coding | coding    | coding    | coding    |
| MSTRG. 204972. 1  | ELANE        | XLOC_214422 | 836  | coding | coding    | coding    | noncoding |
| MSTRG. 205049. 2  | POLR2E       | XLOC_214439 | 7036 | coding | coding    | coding    | coding    |
| XM_011527804. 3   | SBNO2        | XLOC_214441 | 4891 | coding | coding    | coding    | coding    |
| MSTRG. 205005. 2  | MIDN         | XLOC_214451 | 3496 | coding | noncoding | coding    | coding    |
| MSTRG. 205030. 3  | RPS15        | XLOC_214464 | 637  | coding | coding    | coding    | noncoding |

|                   |              |             |      |        |           |           |           |
|-------------------|--------------|-------------|------|--------|-----------|-----------|-----------|
| MSTRG. 205266. 2  | ZNF554       | XLOC_214568 | 991  | coding | coding    | noncoding | noncoding |
| XR_936248. 2      | LOC101928631 | XLOC_214573 | 588  | coding | noncoding | noncoding | noncoding |
| MSTRG. 205371. 2  | FZR1         | XLOC_214616 | 702  | coding | noncoding | coding    | noncoding |
| MSTRG. 205474. 3  | MPND         | XLOC_214670 | 289  | coding | coding    | noncoding | noncoding |
| MSTRG. 205789. 1  | LOC105372256 | XLOC_214820 | 4533 | coding | coding    | coding    | coding    |
| MSTRG. 205799. 3  | ZNF557       | XLOC_214829 | 2813 | coding | coding    | noncoding | noncoding |
| MSTRG. 205819. 5  | ARHGEF18     | XLOC_214838 | 1505 | coding | noncoding | noncoding | noncoding |
| MSTRG. 205915. 5  | CERS4        | XLOC_214893 | 1663 | coding | coding    | coding    | noncoding |
| MSTRG. 205944. 3  | 2-Mar        | XLOC_214904 | 1424 | coding | coding    | coding    | noncoding |
| MSTRG. 205951. 1  | HNRNPM       | XLOC_214905 | 2355 | coding | coding    | coding    | coding    |
| MSTRG. 205951. 3  | HNRNPM       | XLOC_214905 | 2468 | coding | coding    | coding    | coding    |
| MSTRG. 205990. 1  | MYO1F        | XLOC_214915 | 338  | coding | noncoding | noncoding | noncoding |
| NM_016581. 5      | ECSIT        | XLOC_215091 | 1647 | coding | coding    | coding    | coding    |
| MSTRG. 206422. 1  | ZNF433-AS1   | XLOC_215136 | 358  | coding | noncoding | coding    | noncoding |
| MSTRG. 206369. 1  | ZNF788P      | XLOC_215149 | 776  | coding | coding    | noncoding | noncoding |
| MSTRG. 206586. 6  | NFIX         | XLOC_215215 | 2444 | coding | coding    | coding    | noncoding |
| NM_003765. 3      | STX10        | XLOC_215217 | 1304 | coding | coding    | coding    | coding    |
| MSTRG. 206639. 9  | DDX39A       | XLOC_215257 | 6195 | coding | coding    | coding    | coding    |
| MSTRG. 206639. 13 | DDX39A       | XLOC_215257 | 6355 | coding | coding    | coding    | coding    |
| NM_001300914. 1   | DNAJB1       | XLOC_215266 | 2260 | coding | coding    | coding    | coding    |
| MSTRG. 206812. 2  | FAM32A       | XLOC_215363 | 1470 | coding | noncoding | coding    | coding    |
| MSTRG. 206911. 3  | SIN3B        | XLOC_215405 | 2658 | coding | coding    | coding    | coding    |
| MSTRG. 206941. 3  | BABAM1       | XLOC_215424 | 1434 | coding | noncoding | coding    | coding    |
| MSTRG. 206941. 4  | BABAM1       | XLOC_215424 | 1386 | coding | noncoding | coding    | coding    |
| XM_005259739. 4   | LRRC25       | XLOC_215502 | 1967 | coding | noncoding | coding    | coding    |
| MSTRG. 207123. 2  | REX1BD       | XLOC_215515 | 698  | coding | coding    | coding    | noncoding |
| MSTRG. 207249. 3  | ZNF101       | XLOC_215575 | 2089 | coding | coding    | noncoding | coding    |
| XR_001754067. 1   | LOC105372310 | XLOC_215616 | 4416 | coding | coding    | noncoding | noncoding |
| MSTRG. 207556. 1  | ZNF431       | XLOC_215651 | 2731 | coding | coding    | noncoding | noncoding |
| MSTRG. 207582. 12 | ZNF493       | XLOC_215666 | 1381 | coding | coding    | noncoding | noncoding |
| MSTRG. 207436. 4  | ZNF429       | XLOC_215683 | 1792 | coding | coding    | noncoding | noncoding |
| MSTRG. 207524. 1  | ZNF492       | XLOC_215734 | 258  | coding | noncoding | noncoding | noncoding |
| MSTRG. 207704. 7  | ZNF254       | XLOC_215781 | 2827 | coding | coding    | noncoding | noncoding |
| MSTRG. 208056. 3  | DPY19L3      | XLOC_215960 | 2588 | coding | coding    | noncoding | noncoding |
| MSTRG. 208111. 2  | GPATCH1      | XLOC_215990 | 684  | coding | noncoding | noncoding | noncoding |
| MSTRG. 208111. 3  | GPATCH1      | XLOC_215990 | 759  | coding | noncoding | noncoding | noncoding |
| MSTRG. 208174. 4  | LSM14A       | XLOC_216021 | 839  | coding | coding    | coding    | noncoding |
| MSTRG. 208185. 2  | KIAA0355     | XLOC_216023 | 3239 | coding | coding    | coding    | coding    |
| MSTRG. 208185. 3  | KIAA0355     | XLOC_216023 | 795  | coding | coding    | noncoding | noncoding |
| MSTRG. 208197. 4  | UBA2         | XLOC_216027 | 1695 | coding | coding    | noncoding | noncoding |
| MSTRG. 208338. 8  | FFAR2        | XLOC_216085 | 1575 | coding | coding    | coding    | noncoding |
| NR_033390. 1      | TYROBP       | XLOC_216125 | 551  | coding | noncoding | noncoding | noncoding |

|                   |               |             |       |        |           |           |           |
|-------------------|---------------|-------------|-------|--------|-----------|-----------|-----------|
| MSTRG. 208444. 11 | LOC107985304  | XLOC_216147 | 3527  | coding | coding    | noncoding | noncoding |
| MSTRG. 208769. 1  | MRPS12        | XLOC_216327 | 802   | coding | coding    | coding    | noncoding |
| MSTRG. 208900. 1  | ZNF546        | XLOC_216393 | 364   | coding | noncoding | noncoding | noncoding |
| MSTRG. 208940. 2  | PLD3          | XLOC_216412 | 2362  | coding | coding    | coding    | coding    |
| MSTRG. 208940. 4  | PLD3          | XLOC_216412 | 2203  | coding | coding    | coding    | coding    |
| MSTRG. 209030. 6  | LOC105372401  | XLOC_216464 | 5428  | coding | coding    | coding    | coding    |
| MSTRG. 209093. 2  | RPS19         | XLOC_216501 | 748   | coding | coding    | coding    | coding    |
| NM_002659. 4      | PLAUR         | XLOC_216617 | 1368  | coding | coding    | coding    | coding    |
| MSTRG. 209621. 4  | VASP          | XLOC_216750 | 2481  | coding | coding    | coding    | coding    |
| MSTRG. 209621. 3  | VASP          | XLOC_216750 | 2674  | coding | coding    | coding    | coding    |
| XR_001753637. 2   | CARD8         | XLOC_216904 | 3046  | coding | coding    | coding    | coding    |
| MSTRG. 210125. 2  | PRMT1         | XLOC_217017 | 1369  | coding | coding    | coding    | coding    |
| XM_011527347. 1   | FUZ           | XLOC_217023 | 1643  | coding | noncoding | coding    | coding    |
| MSTRG. 210287. 4  | LOC101928517  | XLOC_217111 | 1346  | coding | coding    | noncoding | noncoding |
| MSTRG. 210287. 3  | LOC101928517  | XLOC_217111 | 1394  | coding | coding    | coding    | noncoding |
| XM_017026246. 1   | CLDND2        | XLOC_217124 | 2124  | coding | noncoding | coding    | coding    |
| NR_108100. 1      | SPACA6P-AS    | XLOC_217152 | 3962  | coding | noncoding | coding    | noncoding |
| MSTRG. 210365. 7  | FPR1          | XLOC_217161 | 4578  | coding | coding    | coding    | coding    |
| MSTRG. 210365. 6  | FPR1          | XLOC_217161 | 4734  | coding | coding    | coding    | coding    |
| MSTRG. 210365. 5  | FPR1          | XLOC_217161 | 4798  | coding | coding    | coding    | coding    |
| MSTRG. 210365. 4  | FPR1          | XLOC_217161 | 5818  | coding | coding    | coding    | coding    |
| MSTRG. 210534. 6  | ZNF701        | XLOC_217208 | 1608  | coding | coding    | noncoding | noncoding |
| MSTRG. 210591. 8  | ZNF765-ZNF761 | XLOC_217251 | 682   | coding | coding    | noncoding | noncoding |
| MSTRG. 210599. 5  | ZNF813        | XLOC_217253 | 2937  | coding | coding    | coding    | noncoding |
| MSTRG. 210516. 10 | MYADM         | XLOC_217262 | 2244  | coding | coding    | coding    | coding    |
| NM_001289026. 2   | LAIR1         | XLOC_217287 | 2766  | coding | coding    | coding    | coding    |
| MSTRG. 210645. 8  | LILRA2        | XLOC_217295 | 4464  | coding | coding    | coding    | noncoding |
| MSTRG. 210645. 16 | LILRA1        | XLOC_217295 | 1615  | coding | coding    | noncoding | coding    |
| NM_001002836. 4   | ZNF787        | XLOC_217375 | 1940  | coding | coding    | coding    | coding    |
| NM_001351682. 2   | ZNF787        | XLOC_217375 | 1702  | coding | noncoding | coding    | noncoding |
| MSTRG. 211049. 1  | ZNF274        | XLOC_217510 | 4754  | coding | coding    | coding    | coding    |
| MSTRG. 211107. 1  | ZNF544        | XLOC_217512 | 386   | coding | noncoding | noncoding | noncoding |
| MSTRG. 211090. 2  | ZNF497        | XLOC_217521 | 3626  | coding | coding    | coding    | coding    |
| MSTRG. 211237. 4  | CSNK2A1       | XLOC_217588 | 3773  | coding | coding    | noncoding | noncoding |
| MSTRG. 211336. 1  |               | XLOC_217639 | 308   | coding | noncoding | noncoding | noncoding |
| MSTRG. 211508. 3  | NSFL1C        | XLOC_217667 | 7718  | coding | coding    | noncoding | noncoding |
| MSTRG. 211530. 4  | SIRPB1        | XLOC_217669 | 3170  | coding | coding    | noncoding | noncoding |
| MSTRG. 211530. 9  | LOC105372499  | XLOC_217669 | 4695  | coding | coding    | coding    | noncoding |
| MSTRG. 211530. 26 | LOC107985409  | XLOC_217669 | 9534  | coding | coding    | coding    | noncoding |
| NR_109859. 1      | LINC01730     | XLOC_217823 | 706   | coding | noncoding | noncoding | noncoding |
| MSTRG. 211836. 23 | PANK2         | XLOC_217828 | 12547 | coding | coding    | coding    | noncoding |
| MSTRG. 211836. 32 | PANK2         | XLOC_217828 | 8118  | coding | coding    | noncoding | noncoding |

|                   |               |             |       |        |           |           |           |
|-------------------|---------------|-------------|-------|--------|-----------|-----------|-----------|
| MSTRG. 211789. 2  | SLC23A2       | XLOC_217859 | 7175  | coding | coding    | coding    | coding    |
| MSTRG. 211886. 3  | GPCPD1        | XLOC_217895 | 11025 | coding | coding    | coding    | noncoding |
| MSTRG. 211886. 6  | GPCPD1        | XLOC_217895 | 7892  | coding | coding    | coding    | noncoding |
| MSTRG. 211886. 14 | GPCPD1        | XLOC_217895 | 2892  | coding | coding    | coding    | noncoding |
| MSTRG. 212302. 1  | JAG1          | XLOC_218126 | 228   | coding | noncoding | noncoding | noncoding |
| NM_018327. 4      | SPTLC3        | XLOC_218201 | 6191  | coding | coding    | coding    | coding    |
| NM_001317960. 1   | XRN2          | XLOC_218498 | 3615  | coding | coding    | coding    | coding    |
| MSTRG. 213355. 16 | GZF1          | XLOC_218580 | 11465 | coding | coding    | coding    | noncoding |
| MSTRG. 213355. 20 | NAPB          | XLOC_218580 | 1233  | coding | coding    | noncoding | noncoding |
| MSTRG. 213419. 1  |               | XLOC_218631 | 214   | coding | noncoding | noncoding | noncoding |
| XR_001754418. 1   | ITCH          | XLOC_218902 | 2335  | coding | coding    | coding    | coding    |
| NM_014183. 3      | DYNLRB1       | XLOC_218913 | 700   | coding | coding    | coding    | noncoding |
| MSTRG. 214008. 3  | MYH7B         | XLOC_218926 | 9389  | coding | coding    | coding    | coding    |
| MSTRG. 214096. 2  | CPNE1         | XLOC_218971 | 1966  | coding | coding    | noncoding | noncoding |
| MSTRG. 214096. 6  | CPNE1         | XLOC_218971 | 1762  | coding | coding    | noncoding | noncoding |
| MSTRG. 214139. 2  | SCAND1        | XLOC_218990 | 1843  | coding | coding    | coding    | noncoding |
| MSTRG. 214363. 3  | TTI1          | XLOC_219105 | 3550  | coding | noncoding | noncoding | noncoding |
| MSTRG. 214785. 1  | ZHX3          | XLOC_219277 | 308   | coding | noncoding | noncoding | noncoding |
| MSTRG. 215014. 3  | CHD6          | XLOC_219290 | 4822  | coding | coding    | coding    | coding    |
| MSTRG. 214914. 1  | TOX2          | XLOC_219356 | 263   | coding | noncoding | noncoding | noncoding |
| MSTRG. 215009. 2  | ADA           | XLOC_219408 | 1356  | coding | coding    | coding    | coding    |
| XM_017028029. 2   | STK4          | XLOC_219423 | 5470  | coding | coding    | coding    | coding    |
| MSTRG. 215375. 15 | SULF2         | XLOC_219565 | 4012  | coding | coding    | coding    | coding    |
| MSTRG. 215485. 2  | B4GALT5       | XLOC_219635 | 4710  | coding | coding    | coding    | coding    |
| MSTRG. 215503. 2  | B4GALT5       | XLOC_219636 | 1958  | coding | noncoding | noncoding | noncoding |
| MSTRG. 215681. 4  | ADNP-AS1      | XLOC_219713 | 4998  | coding | coding    | noncoding | noncoding |
| MSTRG. 215681. 5  | ADNP          | XLOC_219713 | 4830  | coding | coding    | noncoding | noncoding |
| MSTRG. 215681. 8  | ADNP          | XLOC_219713 | 5486  | coding | coding    | noncoding | noncoding |
| MSTRG. 215692. 3  | DPM1          | XLOC_219714 | 1174  | coding | coding    | noncoding | noncoding |
| MSTRG. 215780. 3  | NFATC2        | XLOC_219736 | 7437  | coding | coding    | coding    | noncoding |
| MSTRG. 216009. 1  | AURKA         | XLOC_219886 | 895   | coding | coding    | noncoding | noncoding |
| MSTRG. 216009. 6  | AURKA         | XLOC_219886 | 426   | coding | noncoding | noncoding | coding    |
| NM_020356. 4      | CASS4         | XLOC_219889 | 4195  | coding | coding    | coding    | coding    |
| NM_001291780. 2   | RBM38         | XLOC_219934 | 2489  | coding | coding    | coding    | coding    |
| MSTRG. 216218. 8  | PRELID3B      | XLOC_220016 | 2220  | coding | coding    | noncoding | noncoding |
| MSTRG. 216267. 1  | ZNF831        | XLOC_220025 | 214   | coding | noncoding | noncoding | noncoding |
| MSTRG. 216294. 1  | SYCP2         | XLOC_220064 | 472   | coding | noncoding | noncoding | noncoding |
| XR_936990. 3      | LOC105372717  | XLOC_220235 | 1656  | coding | noncoding | coding    | noncoding |
| MSTRG. 216751. 3  | ARFRP1        | XLOC_220284 | 890   | coding | coding    | coding    | noncoding |
| MSTRG. 211341. 2  | PSMF1         | XLOC_220407 | 3335  | coding | coding    | coding    | coding    |
| NR_037661. 1      | FKBP1A-SDCBP2 | XLOC_220436 | 1689  | coding | coding    | coding    | coding    |
| MSTRG. 211535. 1  | LOC105372499  | XLOC_220485 | 234   | coding | coding    | noncoding | noncoding |

|                   |              |             |       |        |           |           |           |
|-------------------|--------------|-------------|-------|--------|-----------|-----------|-----------|
| XR_001754121. 1   | SIRPB1       | XLOC_220504 | 1462  | coding | coding    | coding    | coding    |
| MSTRG. 211645. 2  | LOC102724545 | XLOC_220552 | 6854  | coding | coding    | coding    | coding    |
| NM_001258430. 2   | C20orf27     | XLOC_220625 | 1706  | coding | coding    | coding    | coding    |
| MSTRG. 211726. 2  | CDC25B       | XLOC_220628 | 2852  | coding | coding    | coding    | coding    |
| MSTRG. 211758. 4  | SMOX         | XLOC_220640 | 2292  | coding | coding    | coding    | noncoding |
| MSTRG. 211769. 5  | PRNP         | XLOC_220650 | 2664  | coding | coding    | coding    | coding    |
| MSTRG. 211805. 5  | CDS2         | XLOC_220667 | 3383  | coding | coding    | coding    | noncoding |
| MSTRG. 211881. 6  | SHLD1        | XLOC_220722 | 585   | coding | coding    | noncoding | noncoding |
| MSTRG. 212397. 10 | PLCB1        | XLOC_220791 | 11982 | coding | noncoding | coding    | noncoding |
| MSTRG. 212262. 5  | SLX4IP       | XLOC_220837 | 3616  | coding | coding    | noncoding | noncoding |
| MSTRG. 212997. 1  | SLC24A3      | XLOC_221215 | 665   | coding | noncoding | noncoding | noncoding |
| MSTRG. 213655. 1  | FRG1BP       | XLOC_221702 | 439   | coding | coding    | noncoding | noncoding |
| MSTRG. 213683. 1  | HM13         | XLOC_221725 | 3783  | coding | coding    | coding    | coding    |
| MSTRG. 213683. 2  | HM13         | XLOC_221725 | 2306  | coding | coding    | coding    | coding    |
| NM_002657. 3      | PLAGL2       | XLOC_221756 | 5656  | coding | coding    | coding    | coding    |
| MSTRG. 213836. 3  | ASXL1        | XLOC_221764 | 6735  | coding | coding    | noncoding | coding    |
| MSTRG. 213800. 2  | MAPRE1       | XLOC_221779 | 7845  | coding | coding    | noncoding | noncoding |
| MSTRG. 213949. 4  | DYNLRB1      | XLOC_221851 | 664   | coding | coding    | noncoding | noncoding |
| MSTRG. 214003. 2  | ACSS2        | XLOC_221880 | 2856  | coding | coding    | coding    | noncoding |
| NM_001242600. 2   | RBM39        | XLOC_221948 | 4976  | coding | coding    | coding    | coding    |
| XM_017028141. 2   | RBM39        | XLOC_221948 | 4339  | coding | coding    | coding    | coding    |
| MSTRG. 214204. 1  | DLGAP4       | XLOC_221974 | 3026  | coding | coding    | coding    | noncoding |
| MSTRG. 214250. 3  | MROH8        | XLOC_222008 | 4128  | coding | coding    | coding    | coding    |
| MSTRG. 214368. 2  | RPRD1B       | XLOC_222045 | 1471  | coding | coding    | coding    | noncoding |
| MSTRG. 215116. 3  | YWHAB        | XLOC_222434 | 2970  | coding | coding    | coding    | noncoding |
| MSTRG. 215142. 2  | STK4         | XLOC_222454 | 7437  | coding | coding    | coding    | noncoding |
| MSTRG. 215142. 5  | STK4         | XLOC_222454 | 21131 | coding | coding    | noncoding | noncoding |
| MSTRG. 215142. 19 | STK4         | XLOC_222454 | 6841  | coding | coding    | coding    | noncoding |
| MSTRG. 215053. 12 | LINC02597    | XLOC_222466 | 3768  | coding | noncoding | noncoding | noncoding |
| MSTRG. 215180. 2  | ZSWIM1       | XLOC_222513 | 2094  | coding | coding    | coding    | noncoding |
| NM_182764. 2      | ELMO2        | XLOC_222537 | 4003  | coding | coding    | coding    | coding    |
| NM_001282578. 3   | UBE2V1       | XLOC_222743 | 2299  | coding | coding    | coding    | noncoding |
| NR_047554. 1      | UBE2V1       | XLOC_222743 | 2009  | coding | coding    | noncoding | noncoding |
| MSTRG. 216018. 2  | CASS4        | XLOC_222967 | 4172  | coding | coding    | coding    | noncoding |
| MSTRG. 216092. 5  | RAB22A       | XLOC_223042 | 2413  | coding | noncoding | noncoding | noncoding |
| MSTRG. 216127. 3  | VAPB         | XLOC_223046 | 2339  | coding | coding    | coding    | noncoding |
| MSTRG. 216136. 5  | STX16        | XLOC_223060 | 3856  | coding | coding    | coding    | noncoding |
| MSTRG. 216136. 4  | STX16        | XLOC_223060 | 4685  | coding | coding    | noncoding | noncoding |
| MSTRG. 216136. 10 | STX16        | XLOC_223060 | 8587  | coding | coding    | noncoding | noncoding |
| MSTRG. 216261. 7  | ZNF831       | XLOC_223075 | 6774  | coding | noncoding | coding    | noncoding |
| MSTRG. 216510. 2  | LOC105372707 | XLOC_223252 | 1384  | coding | coding    | coding    | coding    |
| MSTRG. 216510. 3  | LOC105372707 | XLOC_223252 | 1231  | coding | coding    | coding    | coding    |

|                   |              |             |       |        |           |           |           |
|-------------------|--------------|-------------|-------|--------|-----------|-----------|-----------|
| MSTRG. 216696. 13 | GID8         | XLOC_223286 | 1562  | coding | coding    | coding    | coding    |
| MSTRG. 216804. 1  |              | XLOC_223386 | 325   | coding | noncoding | noncoding | noncoding |
| MSTRG. 216971. 2  | RNA45SN1     | XLOC_223443 | 2422  | coding | noncoding | coding    | noncoding |
| MSTRG. 217062. 1  |              | XLOC_223534 | 483   | coding | noncoding | noncoding | noncoding |
| MSTRG. 217036. 1  |              | XLOC_223555 | 285   | coding | noncoding | noncoding | noncoding |
| MSTRG. 217040. 2  | ANKRD20A11P  | XLOC_223558 | 434   | coding | noncoding | noncoding | noncoding |
| MSTRG. 217514. 2  | CHODL        | XLOC_223708 | 2879  | coding | coding    | noncoding | noncoding |
| MSTRG. 217793. 4  | GABPA        | XLOC_223871 | 5151  | coding | coding    | coding    | coding    |
| MSTRG. 217793. 7  | GABPA        | XLOC_223871 | 4776  | coding | coding    | coding    | coding    |
| MSTRG. 218244. 1  |              | XLOC_223964 | 243   | coding | noncoding | noncoding | noncoding |
| MSTRG. 218332. 1  | N6AMT1       | XLOC_224039 | 711   | coding | noncoding | noncoding | noncoding |
| MSTRG. 218384. 1  | N6AMT1       | XLOC_224085 | 1784  | coding | coding    | noncoding | coding    |
| MSTRG. 217938. 8  | LTN1         | XLOC_224111 | 2275  | coding | noncoding | noncoding | noncoding |
| NM_001032410. 1   | USP16        | XLOC_224117 | 3038  | coding | coding    | coding    | coding    |
| XM_017028420. 1   | EVA1C        | XLOC_224298 | 1981  | coding | coding    | coding    | coding    |
| MSTRG. 218512. 7  | PAXBPI-AS1   | XLOC_224347 | 4252  | coding | coding    | coding    | noncoding |
| MSTRG. 218708. 1  | ITSN1        | XLOC_224466 | 363   | coding | noncoding | noncoding | noncoding |
| MSTRG. 218952. 12 | RUNX1        | XLOC_224522 | 2035  | coding | noncoding | coding    | noncoding |
| MSTRG. 218952. 22 | RUNX1        | XLOC_224522 | 18732 | coding | noncoding | coding    | noncoding |
| NM_001320446. 1   | MORC3        | XLOC_224574 | 4332  | coding | coding    | coding    | coding    |
| MSTRG. 219090. 1  | LOC105372795 | XLOC_224606 | 425   | coding | noncoding | noncoding | noncoding |
| NM_001320704. 2   | TTC3         | XLOC_224608 | 7896  | coding | coding    | coding    | coding    |
| NM_001320703. 2   | TTC3         | XLOC_224608 | 7906  | coding | coding    | coding    | coding    |
| NM_005239. 6      | ETS2         | XLOC_224700 | 3668  | coding | coding    | coding    | coding    |
| NM_058186. 4      | FAM3B        | XLOC_224779 | 1317  | coding | coding    | coding    | coding    |
| MSTRG. 219624. 4  | U2AF1        | XLOC_224901 | 1706  | coding | coding    | noncoding | noncoding |
| MSTRG. 219807. 2  | UBE2G2       | XLOC_225010 | 3815  | coding | coding    | coding    | noncoding |
| MSTRG. 219818. 2  | PTTG1IP      | XLOC_225014 | 2357  | coding | noncoding | coding    | noncoding |
| XM_011529451. 1   | COL6A2       | XLOC_225094 | 3730  | coding | coding    | coding    | coding    |
| MSTRG. 216824. 1  | LOC101928576 | XLOC_225144 | 282   | coding | noncoding | noncoding | noncoding |
| MSTRG. 216965. 11 | LOC107987293 | XLOC_225181 | 1133  | coding | noncoding | coding    | noncoding |
| MSTRG. 216965. 16 | LOC105379508 | XLOC_225181 | 4329  | coding | noncoding | coding    | noncoding |
| MSTRG. 216965. 19 | LOC105379508 | XLOC_225181 | 3156  | coding | noncoding | coding    | noncoding |
| MSTRG. 216965. 30 | LOC105379508 | XLOC_225181 | 3870  | coding | noncoding | coding    | noncoding |
| MSTRG. 216965. 32 | LOC105379508 | XLOC_225181 | 2709  | coding | noncoding | coding    | noncoding |
| MSTRG. 216986. 1  | TPTE         | XLOC_225228 | 275   | coding | noncoding | noncoding | noncoding |
| MSTRG. 217117. 2  | ABCC13       | XLOC_225288 | 1737  | coding | coding    | coding    | coding    |
| MSTRG. 217117. 4  | ABCC13       | XLOC_225288 | 2131  | coding | coding    | coding    | noncoding |
| MSTRG. 217117. 5  | ABCC13       | XLOC_225288 | 2330  | coding | coding    | coding    | noncoding |
| MSTRG. 217326. 12 | USP25        | XLOC_225364 | 1822  | coding | coding    | coding    | noncoding |
| MSTRG. 217792. 12 | GABPA        | XLOC_225673 | 2067  | coding | coding    | noncoding | noncoding |
| MSTRG. 217952. 3  | USP16        | XLOC_225804 | 2726  | coding | coding    | noncoding | noncoding |

|                   |              |             |       |        |           |           |           |
|-------------------|--------------|-------------|-------|--------|-----------|-----------|-----------|
| MSTRG. 218562. 14 | BACH1        | XLOC_225815 | 6382  | coding | coding    | coding    | coding    |
| MSTRG. 218562. 18 | BACH1        | XLOC_225815 | 5039  | coding | coding    | coding    | coding    |
| MSTRG. 218541. 1  |              | XLOC_226012 | 407   | coding | noncoding | noncoding | noncoding |
| MSTRG. 218671. 7  | LOC107985481 | XLOC_226022 | 10151 | coding | coding    | coding    | coding    |
| MSTRG. 218671. 5  | LOC107985481 | XLOC_226022 | 9223  | coding | coding    | coding    | coding    |
| MSTRG. 218704. 5  | ITSN1        | XLOC_226037 | 1516  | coding | coding    | noncoding | noncoding |
| MSTRG. 218941. 6  | MORC3        | XLOC_226216 | 4319  | coding | coding    | noncoding | noncoding |
| MSTRG. 219094. 3  | TTC3-AS1     | XLOC_226244 | 7706  | coding | coding    | noncoding | coding    |
| MSTRG. 219229. 1  | LOC105372801 | XLOC_226289 | 32407 | coding | coding    | coding    | coding    |
| MSTRG. 219229. 12 | LOC105372801 | XLOC_226289 | 32568 | coding | noncoding | coding    | coding    |
| MSTRG. 219229. 19 | LOC105372801 | XLOC_226289 | 37333 | coding | coding    | coding    | coding    |
| MSTRG. 219229. 22 | LOC105372801 | XLOC_226289 | 29538 | coding | noncoding | coding    | coding    |
| MSTRG. 219229. 21 | LOC105372801 | XLOC_226289 | 29738 | coding | noncoding | coding    | coding    |
| MSTRG. 219396. 1  | FAM3B        | XLOC_226420 | 819   | coding | coding    | noncoding | noncoding |
| MSTRG. 219426. 2  | MX1          | XLOC_226424 | 3008  | coding | coding    | coding    | noncoding |
| MSTRG. 219493. 3  | ABCG1        | XLOC_226465 | 3907  | coding | coding    | coding    | noncoding |
| MSTRG. 219493. 4  | ABCG1        | XLOC_226465 | 4722  | coding | coding    | coding    | noncoding |
| MSTRG. 219509. 3  | UBASH3A      | XLOC_226473 | 2252  | coding | coding    | coding    | coding    |
| MSTRG. 219753. 1  | TRPM2        | XLOC_226599 | 284   | coding | noncoding | noncoding | noncoding |
| MSTRG. 219974. 1  | PCBP3        | XLOC_226709 | 255   | coding | noncoding | noncoding | noncoding |
| MSTRG. 220193. 7  | MCM3AP       | XLOC_226766 | 409   | coding | coding    | noncoding | noncoding |
| MSTRG. 220219. 5  | DIP2A        | XLOC_226782 | 1663  | coding | coding    | coding    | noncoding |
| MSTRG. 220571. 2  | KLHL22       | XLOC_227041 | 2471  | coding | coding    | coding    | coding    |
| NR_028436. 2      | UBE2L3       | XLOC_227080 | 3137  | coding | coding    | coding    | noncoding |
| XM_005261448. 4   | PPIL2        | XLOC_227090 | 3058  | coding | coding    | coding    | coding    |
| MSTRG. 220671. 5  | MAPK1        | XLOC_227096 | 8144  | coding | coding    | coding    | noncoding |
| NM_002073. 4      | GNAZ         | XLOC_227155 | 3170  | coding | coding    | coding    | coding    |
| MSTRG. 221042. 3  | HPS4         | XLOC_227329 | 1388  | coding | noncoding | coding    | coding    |
| NM_001318371. 2   | SLC35E4      | XLOC_227591 | 2775  | coding | coding    | coding    | coding    |
| MSTRG. 221629. 7  | SLC35E4      | XLOC_227591 | 1221  | coding | coding    | coding    | noncoding |
| MSTRG. 221697. 2  | PATZ1        | XLOC_227623 | 2541  | coding | coding    | coding    | coding    |
| MSTRG. 221744. 4  | EIF4ENIF1    | XLOC_227632 | 2404  | coding | coding    | noncoding | noncoding |
| MSTRG. 221707. 1  | PRR14L       | XLOC_227634 | 10886 | coding | coding    | coding    | noncoding |
| MSTRG. 221707. 5  | PRR14L       | XLOC_227634 | 11403 | coding | coding    | noncoding | noncoding |
| XM_011530392. 3   | APOL6        | XLOC_227804 | 10314 | coding | coding    | coding    | coding    |
| MSTRG. 222202. 2  | RAC2         | XLOC_227890 | 1474  | coding | coding    | coding    | noncoding |
| MSTRG. 222328. 3  | PLA2G6       | XLOC_227952 | 590   | coding | noncoding | noncoding | noncoding |
| NM_001161572. 1   | MAFF         | XLOC_227954 | 2466  | coding | coding    | coding    | coding    |
| MSTRG. 222458. 3  | RPL3         | XLOC_228013 | 2270  | coding | coding    | coding    | coding    |
| NM_182810. 2      | ATF4         | XLOC_228026 | 1420  | coding | coding    | coding    | coding    |
| MSTRG. 222766. 1  | CENPM        | XLOC_228195 | 349   | coding | coding    | noncoding | noncoding |
| MSTRG. 222767. 1  | CENPM        | XLOC_228196 | 256   | coding | coding    | noncoding | noncoding |

|                   |              |             |       |        |           |           |           |
|-------------------|--------------|-------------|-------|--------|-----------|-----------|-----------|
| MSTRG. 222778. 5  | WBP2NL       | XLOC_228199 | 8258  | coding | coding    | coding    | coding    |
| XM_005261312. 1   | NUP50        | XLOC_228348 | 5275  | coding | coding    | coding    | coding    |
| MSTRG. 223296. 4  | CERK         | XLOC_228438 | 1219  | coding | noncoding | noncoding | noncoding |
| MSTRG. 223334. 1  | LINC01644    | XLOC_228504 | 398   | coding | noncoding | noncoding | noncoding |
| NM_014838. 3      | ZBED4        | XLOC_228584 | 6893  | coding | coding    | coding    | coding    |
| XR_001755232. 1   | NCAPH2       | XLOC_228637 | 3431  | coding | coding    | coding    | coding    |
| MSTRG. 223632. 14 | TYMP         | XLOC_228637 | 1729  | coding | coding    | coding    | noncoding |
| MSTRG. 223632. 18 | TYMP         | XLOC_228637 | 1838  | coding | coding    | coding    | coding    |
| MSTRG. 220313. 1  | USP18        | XLOC_228785 | 1933  | coding | coding    | noncoding | coding    |
| MSTRG. 220543. 1  | ZNF74        | XLOC_228911 | 213   | coding | noncoding | noncoding | noncoding |
| MSTRG. 220641. 1  | AIFM3        | XLOC_228945 | 399   | coding | noncoding | noncoding | noncoding |
| MSTRG. 220652. 2  | UBE2L3       | XLOC_228968 | 2861  | coding | coding    | coding    | noncoding |
| MSTRG. 220966. 3  | IGLVI-70     | XLOC_229023 | 675   | coding | coding    | noncoding | noncoding |
| MSTRG. 220966. 22 | IGLVI-70     | XLOC_229023 | 869   | coding | coding    | noncoding | noncoding |
| MSTRG. 220966. 36 | LOC102724638 | XLOC_229023 | 879   | coding | coding    | noncoding | noncoding |
| MSTRG. 220966. 39 | IGLL5        | XLOC_229023 | 898   | coding | coding    | coding    | noncoding |
| MSTRG. 220890. 3  | ADORA2A-AS1  | XLOC_229092 | 2085  | coding | coding    | coding    | coding    |
| MSTRG. 221474. 16 | EWSR1        | XLOC_229390 | 2341  | coding | coding    | coding    | noncoding |
| MSTRG. 221532. 7  | MTMR3        | XLOC_229425 | 3115  | coding | noncoding | coding    | noncoding |
| MSTRG. 221532. 9  | MTMR3        | XLOC_229425 | 1016  | coding | coding    | coding    | noncoding |
| MSTRG. 221600. 3  | SEC14L3      | XLOC_229464 | 2237  | coding | noncoding | coding    | noncoding |
| MSTRG. 221600. 2  | SEC14L3      | XLOC_229464 | 1991  | coding | noncoding | coding    | noncoding |
| MSTRG. 221679. 2  | RNF185       | XLOC_229495 | 3062  | coding | coding    | noncoding | noncoding |
| MSTRG. 221992. 2  | TOM1         | XLOC_229646 | 217   | coding | coding    | noncoding | noncoding |
| MSTRG. 222026. 2  | APOL6        | XLOC_229668 | 3338  | coding | noncoding | noncoding | noncoding |
| MSTRG. 222149. 1  |              | XLOC_229739 | 354   | coding | noncoding | noncoding | noncoding |
| MSTRG. 222277. 2  | TRIOBP       | XLOC_229798 | 2680  | coding | coding    | coding    | coding    |
| MSTRG. 222445. 3  | APOBEC3A     | XLOC_229876 | 1574  | coding | coding    | noncoding | noncoding |
| MSTRG. 222445. 10 | APOBEC3B-AS1 | XLOC_229876 | 1859  | coding | coding    | coding    | coding    |
| MSTRG. 222491. 1  | MIEF1        | XLOC_229910 | 6584  | coding | coding    | coding    | coding    |
| NR_130151. 1      | RPS19BP1     | XLOC_229912 | 1018  | coding | coding    | coding    | noncoding |
| MSTRG. 222620. 19 | TNRC6B       | XLOC_229943 | 16251 | coding | coding    | noncoding | noncoding |
| MSTRG. 222600. 6  | EP300        | XLOC_229995 | 8526  | coding | coding    | coding    | coding    |
| MSTRG. 223159. 3  | ATXN10       | XLOC_230248 | 1469  | coding | noncoding | noncoding | noncoding |
| MSTRG. 223452. 5  | ZBED4        | XLOC_230443 | 8986  | coding | coding    | coding    | coding    |
| MSTRG. 223595. 3  | TRABD        | XLOC_230464 | 2276  | coding | coding    | coding    | coding    |
| MSTRG. 223622. 4  | PPP6R2       | XLOC_230478 | 3743  | coding | coding    | coding    | coding    |
| MSTRG. 223737. 2  | ZBED1        | XLOC_230553 | 4375  | coding | coding    | coding    | coding    |
| NM_001139466. 1   | TBL1X        | XLOC_230728 | 5596  | coding | coding    | coding    | coding    |
| XM_017029404. 2   | AMELX        | XLOC_230831 | 6915  | coding | coding    | coding    | coding    |
| MSTRG. 224511. 1  | GLRA2        | XLOC_230939 | 315   | coding | coding    | noncoding | noncoding |
| XM_005274625. 3   | REPS2        | XLOC_231035 | 7731  | coding | coding    | coding    | coding    |

|                   |          |             |       |        |           |           |           |
|-------------------|----------|-------------|-------|--------|-----------|-----------|-----------|
| MSTRG. 224827. 1  | MAP3K15  | XLOC_231145 | 246   | coding | coding    | noncoding | noncoding |
| MSTRG. 224929. 6  | RPS6KA3  | XLOC_231167 | 4777  | coding | coding    | coding    | noncoding |
| NM_006406. 2      | PRDX4    | XLOC_231245 | 956   | coding | coding    | coding    | coding    |
| MSTRG. 225267. 2  | PCYT1B   | XLOC_231286 | 2199  | coding | coding    | coding    | noncoding |
| MSTRG. 225587. 1  |          | XLOC_231505 | 271   | coding | noncoding | noncoding | noncoding |
| MSTRG. 225852. 2  | RPGR     | XLOC_231607 | 2472  | coding | coding    | coding    | noncoding |
| MSTRG. 225852. 4  | RPGR     | XLOC_231607 | 2499  | coding | coding    | coding    | noncoding |
| MSTRG. 225852. 3  | RPGR     | XLOC_231607 | 2166  | coding | coding    | coding    | noncoding |
| MSTRG. 226093. 2  | CXorf38  | XLOC_231733 | 4032  | coding | coding    | coding    | noncoding |
| NR_024616. 1      | INE1     | XLOC_231995 | 1014  | coding | noncoding | noncoding | noncoding |
| MSTRG. 227096. 1  |          | XLOC_232218 | 255   | coding | noncoding | noncoding | noncoding |
| MSTRG. 227211. 7  | KDM5C    | XLOC_232339 | 3124  | coding | coding    | coding    | coding    |
| MSTRG. 227194. 2  | HSD17B10 | XLOC_232357 | 1038  | coding | coding    | noncoding | coding    |
| MSTRG. 227340. 14 | HUWE1    | XLOC_232361 | 6700  | coding | coding    | coding    | coding    |
| MSTRG. 227388. 7  | APEX2    | XLOC_232424 | 2006  | coding | coding    | coding    | coding    |
| MSTRG. 227481. 1  |          | XLOC_232471 | 226   | coding | noncoding | noncoding | noncoding |
| MSTRG. 227745. 1  |          | XLOC_232632 | 357   | coding | noncoding | noncoding | noncoding |
| MSTRG. 227998. 1  | MTMR8    | XLOC_232703 | 1192  | coding | noncoding | noncoding | noncoding |
| MSTRG. 228002. 1  | MTMR8    | XLOC_232706 | 1310  | coding | noncoding | noncoding | noncoding |
| MSTRG. 228591. 2  | LAS1L    | XLOC_232759 | 2265  | coding | coding    | noncoding | noncoding |
| XM_017029546. 1   | MSN      | XLOC_232760 | 4010  | coding | coding    | coding    | coding    |
| MSTRG. 228184. 1  |          | XLOC_232784 | 303   | coding | noncoding | noncoding | noncoding |
| MSTRG. 228120. 1  | OPHN1    | XLOC_232860 | 359   | coding | coding    | noncoding | noncoding |
| MSTRG. 228434. 1  | TEX11    | XLOC_232947 | 348   | coding | noncoding | noncoding | noncoding |
| XM_006724663. 4   | NLGN3    | XLOC_232970 | 3328  | coding | coding    | coding    | coding    |
| MSTRG. 228609. 2  | ZMYM3    | XLOC_232985 | 1121  | coding | noncoding | coding    | coding    |
| NR_104396. 2      | TAF1     | XLOC_232992 | 1545  | coding | noncoding | coding    | coding    |
| MSTRG. 228803. 4  | HDAC8    | XLOC_233049 | 619   | coding | coding    | coding    | noncoding |
| MSTRG. 228826. 1  | MAP2K4P1 | XLOC_233075 | 922   | coding | coding    | noncoding | noncoding |
| MSTRG. 229009. 1  | JPX      | XLOC_233123 | 232   | coding | noncoding | noncoding | noncoding |
| MSTRG. 229017. 1  | FTX      | XLOC_233125 | 231   | coding | noncoding | noncoding | noncoding |
| MSTRG. 229067. 1  | FTX      | XLOC_233167 | 296   | coding | noncoding | noncoding | noncoding |
| MSTRG. 229077. 3  | FTX      | XLOC_233176 | 2897  | coding | noncoding | coding    | noncoding |
| MSTRG. 229077. 9  | FTX      | XLOC_233176 | 1877  | coding | noncoding | coding    | noncoding |
| MSTRG. 229077. 20 | FTX      | XLOC_233176 | 25635 | coding | coding    | coding    | noncoding |
| MSTRG. 229077. 22 | FTX      | XLOC_233176 | 52304 | coding | noncoding | coding    | noncoding |
| MSTRG. 229077. 27 | FTX      | XLOC_233176 | 3556  | coding | noncoding | noncoding | noncoding |
| MSTRG. 229134. 3  | ATRX     | XLOC_233289 | 8797  | coding | coding    | noncoding | coding    |
| MSTRG. 229134. 7  | ATRX     | XLOC_233289 | 4962  | coding | coding    | noncoding | coding    |
| MSTRG. 229134. 10 | ATRX     | XLOC_233289 | 1304  | coding | noncoding | noncoding | noncoding |
| MSTRG. 229128. 1  | MAGT1    | XLOC_233295 | 5419  | coding | coding    | noncoding | noncoding |
| MSTRG. 229612. 1  |          | XLOC_233461 | 473   | coding | noncoding | noncoding | noncoding |

|                   |           |             |       |        |           |           |           |
|-------------------|-----------|-------------|-------|--------|-----------|-----------|-----------|
| MSTRG. 230782. 1  | MORC4     | XLOC_234083 | 321   | coding | noncoding | noncoding | noncoding |
| MSTRG. 230819. 5  | RBM41     | XLOC_234101 | 599   | coding | coding    | noncoding | noncoding |
| XM_017029855. 1   | ALG13     | XLOC_234271 | 3561  | coding | noncoding | coding    | coding    |
| MSTRG. 231249. 1  |           | XLOC_234400 | 387   | coding | noncoding | noncoding | noncoding |
| MSTRG. 231396. 1  | KLHL13    | XLOC_234428 | 314   | coding | coding    | noncoding | noncoding |
| XM_005262369. 5   | DOCK11    | XLOC_234456 | 6603  | coding | coding    | coding    | coding    |
| MSTRG. 231552. 2  | NKAP      | XLOC_234517 | 948   | coding | coding    | noncoding | coding    |
| MSTRG. 231604. 1  |           | XLOC_234546 | 616   | coding | noncoding | noncoding | noncoding |
| MSTRG. 231611. 1  | NKAPP1    | XLOC_234552 | 716   | coding | noncoding | coding    | noncoding |
| MSTRG. 231619. 3  | LAMP2     | XLOC_234559 | 8036  | coding | coding    | coding    | noncoding |
| MSTRG. 231627. 1  | CUL4B     | XLOC_234565 | 8295  | coding | coding    | coding    | noncoding |
| MSTRG. 231636. 2  | C1GALT1C1 | XLOC_234567 | 1291  | coding | noncoding | noncoding | noncoding |
| NM_012084. 4      | GLUD2     | XLOC_234568 | 2485  | coding | coding    | coding    | coding    |
| XM_006724728. 4   | STAG2     | XLOC_234654 | 5041  | coding | coding    | coding    | coding    |
| NM_001042453. 2   | STK26     | XLOC_234894 | 3020  | coding | coding    | coding    | coding    |
| MSTRG. 232374. 7  | MBNL3     | XLOC_234922 | 8712  | coding | noncoding | coding    | noncoding |
| MSTRG. 232432. 2  | ZNF75D    | XLOC_234981 | 5738  | coding | coding    | coding    | noncoding |
| MSTRG. 232531. 2  | ARHGEF6   | XLOC_235044 | 5069  | coding | coding    | noncoding | noncoding |
| MSTRG. 233434. 2  | BCAP31    | XLOC_235525 | 1465  | coding | coding    | coding    | coding    |
| MSTRG. 233532. 2  | SLC10A3   | XLOC_235573 | 2012  | coding | coding    | coding    | coding    |
| MSTRG. 233827. 12 | TMLHE     | XLOC_235625 | 1538  | coding | coding    | coding    | noncoding |
| MSTRG. 223693. 3  | CSF2RA    | XLOC_235638 | 2103  | coding | coding    | coding    | noncoding |
| MSTRG. 224614. 1  | CLTRN     | XLOC_236052 | 4937  | coding | coding    | coding    | coding    |
| MSTRG. 225067. 1  | CNKSR2    | XLOC_236336 | 597   | coding | coding    | noncoding | noncoding |
| NM_153270. 3      | KLHL34    | XLOC_236370 | 3641  | coding | coding    | coding    | coding    |
| MSTRG. 225222. 1  |           | XLOC_236441 | 382   | coding | noncoding | noncoding | noncoding |
| MSTRG. 225248. 8  | ZFX-AS1   | XLOC_236446 | 7673  | coding | coding    | noncoding | noncoding |
| MSTRG. 225248. 10 | ZFX       | XLOC_236446 | 3015  | coding | noncoding | noncoding | noncoding |
| MSTRG. 225248. 11 | ZFX       | XLOC_236446 | 6915  | coding | coding    | coding    | noncoding |
| MSTRG. 225257. 2  | PDK3      | XLOC_236465 | 2867  | coding | coding    | coding    | noncoding |
| MSTRG. 225386. 5  | POLA1     | XLOC_236469 | 1452  | coding | coding    | coding    | noncoding |
| MSTRG. 225545. 12 | GK        | XLOC_236586 | 682   | coding | coding    | noncoding | noncoding |
| MSTRG. 225545. 20 | GK        | XLOC_236586 | 2867  | coding | coding    | noncoding | noncoding |
| MSTRG. 225795. 4  | CYBB      | XLOC_236716 | 7576  | coding | coding    | coding    | coding    |
| MSTRG. 225894. 1  |           | XLOC_236778 | 718   | coding | noncoding | noncoding | noncoding |
| NM_144970. 3      | CXorf38   | XLOC_236860 | 4244  | coding | coding    | coding    | coding    |
| MSTRG. 226428. 11 | KDM6A     | XLOC_237010 | 4816  | coding | coding    | coding    | noncoding |
| MSTRG. 226630. 1  | ZNF674    | XLOC_237115 | 246   | coding | noncoding | noncoding | noncoding |
| MSTRG. 226655. 1  | UBA1      | XLOC_237154 | 3510  | coding | coding    | coding    | coding    |
| MSTRG. 226699. 3  | ZNF81     | XLOC_237186 | 11478 | coding | coding    | coding    | noncoding |
| MSTRG. 226704. 1  |           | XLOC_237187 | 376   | coding | noncoding | noncoding | noncoding |
| MSTRG. 227599. 1  | KLF8      | XLOC_237572 | 871   | coding | coding    | noncoding | noncoding |

|                   |                |             |      |        |           |           |           |
|-------------------|----------------|-------------|------|--------|-----------|-----------|-----------|
| MSTRG. 227639. 1  | KLF8           | XLOC_237605 | 404  | coding | noncoding | noncoding | noncoding |
| XR_001755692. 1   | SPIN2B         | XLOC_237666 | 1454 | coding | coding    | noncoding | coding    |
| MSTRG. 227810. 1  | FAAH2          | XLOC_237671 | 1493 | coding | noncoding | noncoding | noncoding |
| MSTRG. 227824. 1  | FAAH2          | XLOC_237681 | 1281 | coding | coding    | coding    | coding    |
| MSTRG. 227856. 1  | FAAH2          | XLOC_237710 | 269  | coding | noncoding | noncoding | noncoding |
| MSTRG. 227859. 1  | FAAH2          | XLOC_237712 | 388  | coding | noncoding | noncoding | noncoding |
| MSTRG. 227887. 1  | FAAH2          | XLOC_237730 | 215  | coding | noncoding | noncoding | noncoding |
| MSTRG. 228516. 1  | ZC3H12B        | XLOC_237892 | 267  | coding | noncoding | noncoding | noncoding |
| MSTRG. 228518. 1  | ZC3H12B        | XLOC_237894 | 645  | coding | coding    | noncoding | noncoding |
| MSTRG. 228531. 1  | ZC3H12B        | XLOC_237902 | 202  | coding | noncoding | noncoding | noncoding |
| MSTRG. 228544. 1  | ZC3H12B        | XLOC_237913 | 327  | coding | noncoding | noncoding | noncoding |
| MSTRG. 228547. 1  | ZC3H12B        | XLOC_237916 | 293  | coding | noncoding | noncoding | noncoding |
| MSTRG. 228561. 1  | ZC3H12B        | XLOC_237927 | 212  | coding | coding    | noncoding | noncoding |
| MSTRG. 228339. 1  | EDA            | XLOC_238108 | 976  | coding | noncoding | noncoding | noncoding |
| MSTRG. 228345. 1  | EDA            | XLOC_238114 | 984  | coding | noncoding | noncoding | noncoding |
| MSTRG. 228385. 1  | EDA            | XLOC_238147 | 207  | coding | noncoding | noncoding | noncoding |
| MSTRG. 228386. 1  | EDA            | XLOC_238148 | 288  | coding | coding    | noncoding | noncoding |
| MSTRG. 228393. 1  | EDA            | XLOC_238153 | 449  | coding | noncoding | noncoding | noncoding |
| MSTRG. 228732. 10 | NHSL2          | XLOC_238268 | 9628 | coding | coding    | coding    | noncoding |
| MSTRG. 229229. 1  | LOC646127      | XLOC_238438 | 247  | coding | noncoding | noncoding | noncoding |
| MSTRG. 229233. 1  | LOC646127      | XLOC_238442 | 302  | coding | noncoding | noncoding | noncoding |
| XM_006724668. 3   | ATRX           | XLOC_238526 | 6054 | coding | coding    | coding    | coding    |
| MSTRG. 229405. 2  | LOC107985690   | XLOC_238580 | 9076 | coding | coding    | noncoding | noncoding |
| MSTRG. 229405. 5  | LOC107985690   | XLOC_238580 | 8848 | coding | coding    | noncoding | noncoding |
| MSTRG. 229411. 1  | LOC107985690   | XLOC_238581 | 587  | coding | noncoding | noncoding | noncoding |
| MSTRG. 229385. 1  |                | XLOC_238656 | 567  | coding | noncoding | noncoding | noncoding |
| MSTRG. 230469. 3  | DIAPH2         | XLOC_238977 | 3723 | coding | coding    | coding    | coding    |
| MSTRG. 230469. 5  | DIAPH2         | XLOC_238977 | 2053 | coding | coding    | coding    | noncoding |
| MSTRG. 230307. 1  | ARMCX4         | XLOC_239076 | 683  | coding | noncoding | noncoding | noncoding |
| MSTRG. 230688. 1  | ARMCX5-GPRASP2 | XLOC_239143 | 287  | coding | noncoding | noncoding | noncoding |
| MSTRG. 230700. 1  | ARMCX5-GPRASP2 | XLOC_239153 | 1136 | coding | coding    | noncoding | noncoding |
| MSTRG. 230735. 1  | ARMCX5-GPRASP2 | XLOC_239184 | 503  | coding | noncoding | noncoding | noncoding |
| MSTRG. 230958. 2  | NXT2           | XLOC_239422 | 1742 | coding | coding    | noncoding | noncoding |
| MSTRG. 231290. 9  | ALG13          | XLOC_239470 | 711  | coding | coding    | noncoding | noncoding |
| MSTRG. 231290. 12 | ALG13          | XLOC_239470 | 699  | coding | noncoding | noncoding | noncoding |
| MSTRG. 231388. 1  |                | XLOC_239617 | 282  | coding | noncoding | noncoding | noncoding |
| MSTRG. 231864. 8  | STAG2          | XLOC_239804 | 5840 | coding | coding    | noncoding | noncoding |
| MSTRG. 232178. 1  |                | XLOC_239999 | 211  | coding | coding    | noncoding | noncoding |
| XM_005262441. 3   | MBNL3          | XLOC_240044 | 8843 | coding | noncoding | coding    | coding    |
| MSTRG. 232413. 2  | FAM122C        | XLOC_240107 | 705  | coding | noncoding | noncoding | noncoding |
| NM_007131. 5      | ZNF75D         | XLOC_240130 | 5611 | coding | coding    | coding    | coding    |
| MSTRG. 232463. 5  | INTS6L         | XLOC_240141 | 3571 | coding | coding    | noncoding | noncoding |

|                   |              |             |       |        |           |           |           |
|-------------------|--------------|-------------|-------|--------|-----------|-----------|-----------|
| MSTRG. 233089. 5  | AFF2         | XLOC_240480 | 1119  | coding | coding    | noncoding | noncoding |
| NM_001166550. 4   | IDS          | XLOC_240499 | 7536  | coding | coding    | coding    | coding    |
| XM_024452426. 1   | PNMA6E       | XLOC_240658 | 3279  | coding | coding    | coding    | coding    |
| MSTRG. 233427. 2  | SLC6A8       | XLOC_240669 | 3466  | coding | coding    | coding    | coding    |
| XM_005274648. 1   | GAB3         | XLOC_240740 | 2289  | coding | coding    | coding    | coding    |
| MSTRG. 233836. 1  | TMLHE-AS1    | XLOC_240801 | 302   | coding | noncoding | noncoding | noncoding |
| MSTRG. 233681. 4  | ZBED1        | XLOC_240884 | 4375  | coding | coding    | coding    | coding    |
| MSTRG. 234036. 14 | UTY          | XLOC_240989 | 10218 | coding | coding    | coding    | coding    |
| MSTRG. 233966. 1  | TTY14        | XLOC_241008 | 619   | coding | noncoding | noncoding | noncoding |
| MSTRG. 233990. 1  | TTY14        | XLOC_241031 | 325   | coding | noncoding | noncoding | noncoding |
| MSTRG. 234004. 1  | TTY14        | XLOC_241043 | 236   | coding | coding    | noncoding | noncoding |
| MSTRG. 233758. 2  | LINC00278    | XLOC_241235 | 13838 | coding | coding    | noncoding | noncoding |
| MSTRG. 233758. 10 | LINC00278    | XLOC_241235 | 12613 | coding | noncoding | coding    | noncoding |
| MSTRG. 233890. 2  | USP9Y        | XLOC_241311 | 2297  | coding | noncoding | noncoding | noncoding |
| MSTRG. 234179. 1  |              | XLOC_241503 | 256   | coding | noncoding | noncoding | noncoding |
| MSTRG. 234321. 2  | HLA-A        | XLOC_241651 | 1062  | coding | coding    | coding    | coding    |
| MSTRG. 234384. 6  | HLA-B        | XLOC_241699 | 1291  | coding | coding    | coding    | coding    |
| MSTRG. 234319. 1  | HLA-H        | XLOC_241858 | 746   | coding | coding    | coding    | noncoding |
| MSTRG. 234319. 2  | HLA-A        | XLOC_241858 | 958   | coding | coding    | noncoding | coding    |
| MSTRG. 234319. 6  | HLA-A        | XLOC_241858 | 935   | coding | coding    | coding    | noncoding |
| MSTRG. 234319. 7  | HLA-A        | XLOC_241858 | 8036  | coding | coding    | coding    | coding    |
| MSTRG. 234453. 1  | RNF5         | XLOC_241953 | 770   | coding | noncoding | noncoding | noncoding |
| NR_003287. 4      | RNA28SN5     | XLOC_242059 | 5070  | coding | noncoding | coding    | noncoding |
| MSTRG. 234635. 11 | RNA45SN5     | XLOC_242059 | 2874  | coding | noncoding | coding    | noncoding |
| MSTRG. 234635. 13 | RNA45SN5     | XLOC_242059 | 3775  | coding | noncoding | coding    | coding    |
| MSTRG. 234635. 18 | RNA45SN5     | XLOC_242059 | 4995  | coding | noncoding | coding    | noncoding |
| MSTRG. 234635. 19 | RNA45SN5     | XLOC_242059 | 4623  | coding | noncoding | coding    | noncoding |
| MSTRG. 234634. 13 | LOC100507412 | XLOC_242063 | 2757  | coding | noncoding | coding    | noncoding |
| MSTRG. 234634. 21 | LOC112268313 | XLOC_242063 | 3360  | coding | noncoding | coding    | noncoding |
| MSTRG. 234645. 2  | HLA-A        | XLOC_242242 | 714   | coding | coding    | noncoding | noncoding |
| MSTRG. 234645. 4  | HLA-A        | XLOC_242242 | 907   | coding | coding    | coding    | noncoding |
| MSTRG. 235008. 1  | HLA-C        | XLOC_242734 | 1568  | coding | coding    | noncoding | coding    |
| MSTRG. 235008. 9  | HLA-C        | XLOC_242734 | 913   | coding | coding    | coding    | noncoding |
| NR_073072. 1_4    | NRM          | XLOC_242878 | 1224  | coding | noncoding | coding    | coding    |
| MSTRG. 235179. 1  | HLA-C        | XLOC_243033 | 1828  | coding | coding    | coding    | coding    |
| MSTRG. 235179. 3  | HLA-C        | XLOC_243033 | 2090  | coding | coding    | coding    | coding    |
| MSTRG. 235179. 4  | HLA-C        | XLOC_243033 | 1546  | coding | coding    | coding    | coding    |
| MSTRG. 235179. 7  | HLA-C        | XLOC_243033 | 1551  | coding | coding    | coding    | coding    |
| MSTRG. 235179. 12 | HLA-B        | XLOC_243033 | 1670  | coding | coding    | coding    | coding    |
| NR_073072. 1_5    | NRM          | XLOC_243196 | 1224  | coding | noncoding | coding    | coding    |
| MSTRG. 235182. 1  | HLA-C        | XLOC_243213 | 2092  | coding | coding    | coding    | coding    |
| MSTRG. 235174. 1  | MICB         | XLOC_243219 | 345   | coding | coding    | noncoding | noncoding |

|                   |              |             |      |        |           |           |           |
|-------------------|--------------|-------------|------|--------|-----------|-----------|-----------|
| MSTRG. 235411. 2  | HLA-C        | XLOC_243395 | 895  | coding | coding    | coding    | noncoding |
| MSTRG. 235411. 4  | HLA-C        | XLOC_243395 | 1488 | coding | coding    | coding    | coding    |
| MSTRG. 235442. 1  | LY6G5C       | XLOC_243426 | 380  | coding | noncoding | noncoding | noncoding |
| NM_001363515. 1_6 | DHX16        | XLOC_243560 | 4137 | coding | coding    | coding    | coding    |
| MSTRG. 235607. 1  | TRIM10       | XLOC_243721 | 1748 | coding | noncoding | noncoding | noncoding |
| NM_001161376. 2_6 | C6orf136     | XLOC_243741 | 1882 | coding | coding    | coding    | coding    |
| MSTRG. 235656. 1  | HLA-C        | XLOC_243759 | 1555 | coding | coding    | coding    | noncoding |
| MSTRG. 235656. 2  | HLA-C        | XLOC_243759 | 1449 | coding | coding    | coding    | coding    |
| MSTRG. 235656. 5  | HLA-B        | XLOC_243759 | 526  | coding | noncoding | noncoding | noncoding |
| MSTRG. 235690. 1  | LY6G5C       | XLOC_243793 | 380  | coding | noncoding | noncoding | noncoding |
| MSTRG. 235749. 2  | HLA-DRB1     | XLOC_243823 | 1171 | coding | coding    | coding    | noncoding |
| MSTRG. 235749. 7  | HLA-DRB1     | XLOC_243823 | 794  | coding | coding    | coding    | noncoding |
| MSTRG. 235598. 2  | HLA-H        | XLOC_243903 | 524  | coding | coding    | noncoding | noncoding |
| MSTRG. 235598. 4  | HLA-A        | XLOC_243903 | 1741 | coding | coding    | noncoding | noncoding |
| MSTRG. 235657. 3  | HLA-C        | XLOC_243934 | 603  | coding | coding    | coding    | noncoding |
| MSTRG. 235724. 1  | SKIV2L       | XLOC_243975 | 230  | coding | noncoding | noncoding | noncoding |
| NM_001243962. 1_5 | HLA-DQB1     | XLOC_243995 | 1641 | coding | coding    | coding    | coding    |
| MSTRG. 235825. 7  | YTHDC1       | XLOC_244027 | 3796 | coding | coding    | coding    | noncoding |
| MSTRG. 235825. 8  | YTHDC1       | XLOC_244027 | 3874 | coding | coding    | coding    | noncoding |
| MSTRG. 236074. 5  | LOC105379549 | XLOC_244298 | 6296 | coding | noncoding | coding    | noncoding |
| MSTRG. 236074. 12 | RNA45SN4     | XLOC_244298 | 4659 | coding | noncoding | coding    | noncoding |
| MSTRG. 236074. 9  | LOC105379549 | XLOC_244298 | 3056 | coding | noncoding | coding    | noncoding |
| MSTRG. 236361. 2  | CEP170       | XLOC_244582 | 5162 | coding | coding    | noncoding | coding    |
| MSTRG. 236361. 3  | CEP170       | XLOC_244582 | 7975 | coding | coding    | noncoding | noncoding |
| MSTRG. 236329. 1  |              | XLOC_244725 | 348  | coding | noncoding | noncoding | noncoding |
| MSTRG. 236498. 1  | FAM120B      | XLOC_244873 | 209  | coding | noncoding | noncoding | noncoding |
| MSTRG. 236512. 4  | THEMIS       | XLOC_244901 | 4430 | coding | coding    | noncoding | noncoding |
| NR_125849. 1_1    | LOC101928140 | XLOC_244906 | 1818 | coding | noncoding | noncoding | noncoding |
| MSTRG. 236740. 52 | TRBV1        | XLOC_245023 | 355  | coding | coding    | coding    | noncoding |
| MSTRG. 236740. 69 | TRBV1        | XLOC_245023 | 530  | coding | noncoding | noncoding | noncoding |
| MSTRG. 236617. 6  | MGAM         | XLOC_245105 | 4212 | coding | coding    | coding    | coding    |
| MSTRG. 236856. 22 | TRBV1        | XLOC_245152 | 744  | coding | coding    | noncoding | noncoding |
| MSTRG. 236667. 2  | TSTA3        | XLOC_245215 | 909  | coding | coding    | coding    | coding    |
| NM_003313. 4_1    | TSTA3        | XLOC_245232 | 1345 | coding | coding    | coding    | coding    |
| MSTRG. 236687. 3  | LY6E         | XLOC_245254 | 1131 | coding | coding    | coding    | noncoding |
| MSTRG. 236908. 7  | NAP1L4       | XLOC_245388 | 2682 | coding | coding    | noncoding | coding    |
| MSTRG. 236908. 11 | NAP1L4       | XLOC_245388 | 2429 | coding | coding    | noncoding | noncoding |
| MSTRG. 236906. 1  | SLC22A18AS   | XLOC_245397 | 3018 | coding | coding    | coding    | coding    |
| MSTRG. 236918. 1  | RNH1         | XLOC_245409 | 1925 | coding | coding    | coding    | coding    |
| MSTRG. 237073. 8  | IGHA2        | XLOC_245514 | 1262 | coding | coding    | coding    | coding    |
| MSTRG. 237106. 2  | IGHA2        | XLOC_245539 | 523  | coding | coding    | noncoding | noncoding |
| MSTRG. 237021. 1  | ASB2         | XLOC_245583 | 265  | coding | coding    | noncoding | noncoding |

|                   |              |             |       |        |           |           |           |
|-------------------|--------------|-------------|-------|--------|-----------|-----------|-----------|
| MSTRG. 237039. 4  | SERPINA1     | XLOC_245595 | 621   | coding | coding    | coding    | noncoding |
| MSTRG. 237029. 1  | IFI27        | XLOC_245613 | 518   | coding | coding    | coding    | coding    |
| MSTRG. 237029. 5  | IFI27        | XLOC_245613 | 401   | coding | coding    | noncoding | noncoding |
| NM_001127701. 1_1 | SERPINA1     | XLOC_245620 | 3532  | coding | coding    | coding    | coding    |
| MSTRG. 237230. 3  | MARF1        | XLOC_245741 | 8688  | coding | coding    | coding    | noncoding |
| MSTRG. 237230. 11 | MARF1        | XLOC_245741 | 4075  | coding | coding    | coding    | noncoding |
| MSTRG. 237230. 14 | MARF1        | XLOC_245741 | 3148  | coding | coding    | coding    | noncoding |
| MSTRG. 237184. 3  | NTAN1        | XLOC_245778 | 1016  | coding | coding    | noncoding | noncoding |
| NM_001004431. 3_1 | METRNL       | XLOC_245867 | 1689  | coding | noncoding | coding    | coding    |
| NM_001281433. 1_1 | ZNHIT3       | XLOC_245909 | 925   | coding | coding    | coding    | noncoding |
| MSTRG. 237495. 1  | ELANE        | XLOC_246101 | 828   | coding | coding    | coding    | noncoding |
| MSTRG. 237660. 3  | NAIP         | XLOC_246393 | 882   | coding | coding    | noncoding | noncoding |
| MSTRG. 237618. 5  | LOC105379623 | XLOC_246412 | 5522  | coding | coding    | coding    | noncoding |
| MSTRG. 237638. 1  | SMN2         | XLOC_246414 | 910   | coding | coding    | noncoding | coding    |
| MSTRG. 237699. 3  | LOC105375112 | XLOC_246442 | 10805 | coding | noncoding | coding    | coding    |
| MSTRG. 237699. 4  | LOC105375112 | XLOC_246442 | 11280 | coding | noncoding | noncoding | coding    |
| MSTRG. 237699. 12 | LOC105375112 | XLOC_246442 | 6897  | coding | noncoding | coding    | coding    |
| MSTRG. 237742. 1  | PRH1-PRR4    | XLOC_246480 | 235   | coding | noncoding | noncoding | noncoding |
| NM_176888. 2_2    | TAS2R19      | XLOC_246516 | 1002  | coding | coding    | coding    | coding    |
| NM_014967. 5_2    | FAN1         | XLOC_246587 | 4849  | coding | coding    | coding    | coding    |
| NM_015443. 3_2    | KANSL1       | XLOC_246756 | 5051  | coding | coding    | coding    | coding    |
| MSTRG. 237935. 1  |              | XLOC_246785 | 291   | coding | noncoding | noncoding | noncoding |
| MSTRG. 237966. 4  | LOC101927752 | XLOC_246919 | 1061  | coding | noncoding | coding    | noncoding |
| MSTRG. 238020. 9  | LILRB2       | XLOC_247049 | 2185  | coding | coding    | coding    | noncoding |
| NM_001289026. 2_4 | LAIR1        | XLOC_247099 | 2766  | coding | coding    | coding    | coding    |
| MSTRG. 238045. 3  | LILRA2       | XLOC_247108 | 3236  | coding | coding    | coding    | noncoding |
| MSTRG. 238045. 12 | LILRA2       | XLOC_247108 | 2161  | coding | coding    | noncoding | noncoding |
| MSTRG. 238049. 6  | LILRA1       | XLOC_247110 | 4341  | coding | coding    | coding    | coding    |
| MSTRG. 238056. 2  | SLC27A3      | XLOC_247132 | 1675  | coding | coding    | coding    | coding    |
| MSTRG. 238123. 6  | NAIP         | XLOC_247265 | 5356  | coding | coding    | noncoding | noncoding |
| MSTRG. 238256. 2  | 8-Mar        | XLOC_247349 | 5482  | coding | coding    | coding    | coding    |
| MSTRG. 238256. 3  | 8-Mar        | XLOC_247349 | 9928  | coding | coding    | coding    | coding    |
| MSTRG. 238327. 1  |              | XLOC_247469 | 291   | coding | noncoding | noncoding | noncoding |
| MSTRG. 238346. 1  |              | XLOC_247489 | 528   | coding | noncoding | noncoding | noncoding |
| MSTRG. 238349. 3  | LSM14A       | XLOC_247496 | 1754  | coding | coding    | coding    | noncoding |
| MSTRG. 238349. 5  | LSM14A       | XLOC_247496 | 5701  | coding | coding    | coding    | noncoding |
| MSTRG. 238354. 2  | KIAA0355     | XLOC_247498 | 1160  | coding | noncoding | noncoding | noncoding |
| NR_027873. 1_1    | PAXBP1       | XLOC_247518 | 671   | coding | noncoding | coding    | noncoding |
| NM_001329128. 1_1 | IFNGR2       | XLOC_247527 | 1560  | coding | coding    | coding    | coding    |
| MSTRG. 238397. 5  | APOBEC3A_B   | XLOC_247554 | 1162  | coding | coding    | noncoding | noncoding |
| MSTRG. 238397. 8  | APOBEC3A_B   | XLOC_247554 | 1727  | coding | coding    | coding    | noncoding |
| MSTRG. 238454. 1  | PRH1-PRR4    | XLOC_247581 | 235   | coding | noncoding | noncoding | noncoding |

|                   |           |             |      |        |           |           |           |
|-------------------|-----------|-------------|------|--------|-----------|-----------|-----------|
| MSTRG. 238471. 2  | PRH1-PRR4 | XLOC_247597 | 842  | coding | noncoding | noncoding | noncoding |
| MSTRG. 238494. 1  | PRH1-PRR4 | XLOC_247608 | 518  | coding | coding    | noncoding | noncoding |
| NM_001278428. 3_1 | LILRB4    | XLOC_247659 | 3902 | coding | coding    | coding    | coding    |
| MSTRG. 238505. 4  | LILRA2    | XLOC_247694 | 2909 | coding | coding    | coding    | coding    |
| MSTRG. 238505. 8  | LILRA2    | XLOC_247694 | 3090 | coding | coding    | coding    | noncoding |
| MSTRG. 238505. 12 | LILRA2    | XLOC_247694 | 4579 | coding | coding    | coding    | coding    |
| MSTRG. 238505. 15 | LILRA2    | XLOC_247694 | 4278 | coding | coding    | coding    | noncoding |
| MSTRG. 238528. 1  | LAIR1     | XLOC_247712 | 858  | coding | coding    | noncoding | noncoding |
| NM_001289026. 2_1 | LAIR1     | XLOC_247740 | 2766 | coding | coding    | coding    | coding    |
| MSTRG. 238525. 1  | FCAR      | XLOC_247741 | 341  | coding | noncoding | noncoding | noncoding |
| NM_024316. 3_6    | LENG1     | XLOC_247868 | 1381 | coding | coding    | coding    | coding    |
| MSTRG. 238613. 1  | LAIR1     | XLOC_247892 | 2563 | coding | coding    | noncoding | noncoding |
| NM_001278428. 3_2 | LILRB4    | XLOC_247902 | 3902 | coding | coding    | coding    | coding    |
| NM_001289026. 2_2 | LAIR1     | XLOC_247934 | 2677 | coding | coding    | coding    | coding    |
| MSTRG. 238624. 2  | LILRA2    | XLOC_247942 | 4291 | coding | coding    | coding    | coding    |
| MSTRG. 238624. 7  | LILRA2    | XLOC_247942 | 3022 | coding | coding    | coding    | coding    |
| MSTRG. 238624. 8  | LILRA2    | XLOC_247942 | 3141 | coding | coding    | coding    | coding    |
| MSTRG. 238624. 15 | LILRA2    | XLOC_247942 | 4213 | coding | coding    | noncoding | coding    |
| MSTRG. 238652. 2  | LAIR1     | XLOC_247966 | 2682 | coding | coding    | noncoding | noncoding |
| NM_001289026. 2_3 | LAIR1     | XLOC_247995 | 2766 | coding | coding    | coding    | coding    |
| MSTRG. 238741. 2  | RPL7A     | XLOC_248155 | 1123 | coding | coding    | coding    | noncoding |
| MSTRG. 238765. 2  | CCDC84    | XLOC_248173 | 1824 | coding | coding    | coding    | coding    |
| MSTRG. 238790. 2  | PSMC4     | XLOC_248207 | 692  | coding | coding    | coding    | noncoding |
| MSTRG. 238797. 1  | ZNF546    | XLOC_248211 | 364  | coding | noncoding | noncoding | noncoding |
| MSTRG. 238835. 3  | PADI4     | XLOC_248264 | 1923 | coding | coding    | coding    | coding    |
| MSTRG. 238852. 3  | ATG16L1   | XLOC_248286 | 8317 | coding | coding    | coding    | noncoding |
| MSTRG. 238990. 7  | FAN1      | XLOC_248431 | 3778 | coding | coding    | coding    | noncoding |
| MSTRG. 238943. 1  |           | XLOC_248467 | 253  | coding | noncoding | noncoding | noncoding |
| MSTRG. 239028. 1  | IGKV7-3   | XLOC_248545 | 362  | coding | coding    | noncoding | noncoding |
| IGKV3-20_1        | IGKV3-20  | XLOC_248551 | 348  | coding | coding    | coding    | noncoding |
| MSTRG. 239109. 1  |           | XLOC_248646 | 297  | coding | noncoding | noncoding | noncoding |
| MSTRG. 239114. 2  | ATAD1     | XLOC_248660 | 995  | coding | coding    | noncoding | noncoding |
| MSTRG. 239238. 1  | MRPS12    | XLOC_248801 | 802  | coding | coding    | coding    | noncoding |
| MSTRG. 239245. 1  |           | XLOC_248825 | 329  | coding | noncoding | noncoding | noncoding |
| MSTRG. 239276. 2  | NDUFS1    | XLOC_248865 | 439  | coding | noncoding | noncoding | noncoding |
| MSTRG. 239303. 4  | GUSBP1    | XLOC_248909 | 978  | coding | coding    | coding    | noncoding |
| MSTRG. 239316. 1  | GUSBP1    | XLOC_248921 | 795  | coding | noncoding | noncoding | noncoding |
| MSTRG. 239345. 6  | HNRNP1    | XLOC_248945 | 1903 | coding | coding    | noncoding | noncoding |
| MSTRG. 239333. 4  | CANX      | XLOC_248969 | 4911 | coding | coding    | noncoding | noncoding |
| MSTRG. 239353. 2  | SQSTM1    | XLOC_248973 | 1995 | coding | coding    | coding    | coding    |
| NM_001102614. 1_1 | SLC35G6   | XLOC_248986 | 1195 | coding | noncoding | coding    | coding    |
| MSTRG. 239406. 5  | PLCL2     | XLOC_249163 | 1550 | coding | noncoding | coding    | noncoding |

|                   |              |             |      |        |           |           |           |
|-------------------|--------------|-------------|------|--------|-----------|-----------|-----------|
| MSTRG. 239537. 3  | SMG1P3       | XLOC_249287 | 2369 | coding | coding    | coding    | noncoding |
| MSTRG. 239537. 7  | SMG1P1       | XLOC_249287 | 3948 | coding | coding    | coding    | noncoding |
| MSTRG. 239537. 6  | SMG1P1       | XLOC_249287 | 1010 | coding | coding    | coding    | coding    |
| NR_047581. 1_1    | POLR3E       | XLOC_249344 | 3681 | coding | coding    | coding    | coding    |
| MSTRG. 239627. 2  | RRN3P1       | XLOC_249351 | 4750 | coding | coding    | coding    | coding    |
| MSTRG. 239627. 1  | RRN3P1       | XLOC_249351 | 4272 | coding | coding    | coding    | noncoding |
| MSTRG. 239627. 7  | RRN3P1       | XLOC_249351 | 7299 | coding | coding    | coding    | noncoding |
| MSTRG. 239627. 22 | LOC112268174 | XLOC_249351 | 6466 | coding | coding    | noncoding | noncoding |
| MSTRG. 239627. 46 |              | XLOC_249351 | 6431 | coding | coding    | coding    | noncoding |
| MSTRG. 239705. 1  |              | XLOC_249452 | 267  | coding | noncoding | noncoding | noncoding |
| NR_126022. 1_1    | LOC101928605 | XLOC_249527 | 990  | coding | coding    | noncoding | noncoding |
| MSTRG. 239818. 3  | DEFA1        | XLOC_249629 | 750  | coding | coding    | coding    | coding    |
| MSTRG. 239822. 1  | DEFA3        | XLOC_249630 | 574  | coding | coding    | noncoding | noncoding |
| MSTRG. 239879. 3  | FDFT1        | XLOC_249654 | 1869 | coding | coding    | noncoding | noncoding |
| MSTRG. 239863. 1  |              | XLOC_249846 | 243  | coding | noncoding | noncoding | noncoding |
| MSTRG. 240109. 1  | LOC100506990 | XLOC_249996 | 379  | coding | coding    | noncoding | noncoding |
| MSTRG. 240227. 16 | GMPR2        | XLOC_250083 | 4476 | coding | coding    | coding    | coding    |
| NR_023921. 2_1    | DHRS4-AS1    | XLOC_250095 | 3052 | coding | noncoding | coding    | noncoding |
| MSTRG. 240205. 11 | DCAF11       | XLOC_250103 | 3282 | coding | coding    | coding    | coding    |
| MSTRG. 240212. 5  | IRF9         | XLOC_250109 | 775  | coding | coding    | noncoding | noncoding |
| MSTRG. 240212. 7  | IRF9         | XLOC_250109 | 1648 | coding | coding    | noncoding | noncoding |
| NM_006405. 7_1    | TM9SF1       | XLOC_250111 | 2200 | coding | coding    | coding    | coding    |
| MSTRG. 240285. 8  | FNBP4        | XLOC_250176 | 2442 | coding | coding    | coding    | noncoding |
| MSTRG. 240383. 1  | HSD17B7P2    | XLOC_250301 | 454  | coding | noncoding | noncoding | noncoding |
| NM_001242932. 1_1 | LSP1         | XLOC_250322 | 2016 | coding | coding    | coding    | coding    |
| MSTRG. 240481. 1  |              | XLOC_250410 | 371  | coding | noncoding | noncoding | noncoding |
| NM_001286742. 1_1 | UBL7         | XLOC_250445 | 1548 | coding | coding    | coding    | coding    |
| NM_001143760. 1_1 | EIF5A        | XLOC_250626 | 1256 | coding | coding    | coding    | coding    |
| MSTRG. 240742. 8  | RNA45SN1     | XLOC_250701 | 3719 | coding | noncoding | coding    | noncoding |
| MSTRG. 240737. 2  | C1GALT1C1    | XLOC_250717 | 1291 | coding | noncoding | noncoding | noncoding |
| NM_012084. 4_1    | GLUD2        | XLOC_250718 | 2485 | coding | coding    | coding    | coding    |

#### Downregulated DE mRNAs

| Gene_id         | Gene_name    | Xloc_id     | trans_len | EggNOG | Pfam      | CNCI      | CPC2      |
|-----------------|--------------|-------------|-----------|--------|-----------|-----------|-----------|
| MSTRG. 156. 1   | LOC729737    | XLOC_000011 | 7220      | coding | coding    | coding    | noncoding |
| MSTRG. 169. 1   | LOC112268260 | XLOC_000020 | 478       | coding | coding    | noncoding | noncoding |
| MSTRG. 185. 1   |              | XLOC_000023 | 636       | coding | coding    | noncoding | noncoding |
| MSTRG. 194. 1   | LOC107984841 | XLOC_000026 | 5412      | coding | coding    | coding    | noncoding |
| XR_002958526. 1 | LOC284600    | XLOC_000039 | 3858      | coding | noncoding | coding    | noncoding |
| MSTRG. 22. 7    | KLHL17       | XLOC_000043 | 269       | coding | coding    | coding    | noncoding |
| MSTRG. 15. 1    |              | XLOC_000047 | 238       | coding | noncoding | noncoding | noncoding |
| MSTRG. 21. 1    | ISG15        | XLOC_000049 | 381       | coding | noncoding | noncoding | noncoding |
| MSTRG. 46. 1    | C1orf159     | XLOC_000056 | 216       | coding | noncoding | noncoding | noncoding |

|                 |              |             |       |        |           |           |           |
|-----------------|--------------|-------------|-------|--------|-----------|-----------|-----------|
| MSTRG. 36. 1    |              | XLOC_000058 | 391   | coding | noncoding | noncoding | noncoding |
| MSTRG. 38. 1    | LINC01342    | XLOC_000060 | 268   | coding | noncoding | noncoding | noncoding |
| MSTRG. 52. 1    | TTLL10-AS1   | XLOC_000068 | 234   | coding | noncoding | noncoding | noncoding |
| MSTRG. 71. 1    | LINC01786    | XLOC_000080 | 228   | coding | noncoding | noncoding | noncoding |
| MSTRG. 85. 1    | LOC105378585 | XLOC_000099 | 255   | coding | noncoding | noncoding | noncoding |
| NM_001039211. 3 | ATAD3C       | XLOC_000103 | 3864  | coding | coding    | coding    | coding    |
| NM_001317238. 2 | ATAD3B       | XLOC_000104 | 4491  | coding | coding    | coding    | coding    |
| MSTRG. 121. 1   | ATAD3B       | XLOC_000106 | 400   | coding | noncoding | noncoding | noncoding |
| MSTRG. 319. 6   | SLC35E2B     | XLOC_000116 | 696   | coding | noncoding | noncoding | noncoding |
| MSTRG. 129. 1   |              | XLOC_000121 | 275   | coding | noncoding | noncoding | noncoding |
| XM_017001793. 1 | PRKCZ        | XLOC_000129 | 3212  | coding | coding    | coding    | coding    |
| MSTRG. 234. 1   | FAAP20       | XLOC_000135 | 252   | coding | noncoding | noncoding | noncoding |
| NM_001303013. 1 | PLCH2        | XLOC_000153 | 5811  | coding | coding    | coding    | coding    |
| MSTRG. 278. 2   | PANK4        | XLOC_000155 | 2393  | coding | coding    | coding    | coding    |
| MSTRG. 247. 1   | HES5         | XLOC_000156 | 305   | coding | coding    | noncoding | noncoding |
| NM_022114. 4    | PRDM16       | XLOC_000182 | 8698  | coding | coding    | coding    | coding    |
| XM_011541786. 2 | AJAP1        | XLOC_000243 | 12138 | coding | coding    | coding    | coding    |
| MSTRG. 443. 1   |              | XLOC_000249 | 681   | coding | noncoding | noncoding | noncoding |
| MSTRG. 464. 1   |              | XLOC_000257 | 276   | coding | noncoding | noncoding | noncoding |
| MSTRG. 512. 1   | CHD5         | XLOC_000292 | 443   | coding | noncoding | coding    | noncoding |
| MSTRG. 513. 1   | CHD5         | XLOC_000293 | 273   | coding | noncoding | noncoding | noncoding |
| XM_011542236. 2 | ESPN         | XLOC_000304 | 3501  | coding | coding    | coding    | coding    |
| MSTRG. 591. 1   | TAS1R1       | XLOC_000312 | 324   | coding | coding    | noncoding | noncoding |
| MSTRG. 593. 1   | LOC107984912 | XLOC_000313 | 268   | coding | noncoding | noncoding | noncoding |
| MSTRG. 640. 1   | CAMTA1       | XLOC_000326 | 253   | coding | coding    | noncoding | noncoding |
| MSTRG. 654. 1   | CAMTA1       | XLOC_000331 | 229   | coding | noncoding | noncoding | noncoding |
| MSTRG. 655. 1   | CAMTA1       | XLOC_000332 | 218   | coding | noncoding | noncoding | noncoding |
| MSTRG. 664. 1   | CAMTA1       | XLOC_000337 | 454   | coding | noncoding | noncoding | noncoding |
| MSTRG. 700. 1   |              | XLOC_000368 | 855   | coding | coding    | noncoding | noncoding |
| MSTRG. 698. 1   |              | XLOC_000372 | 298   | coding | noncoding | noncoding | noncoding |
| MSTRG. 709. 1   | SLC45A1      | XLOC_000375 | 325   | coding | noncoding | noncoding | noncoding |
| MSTRG. 958. 1   | RERE         | XLOC_000378 | 8748  | coding | coding    | coding    | coding    |
| MSTRG. 958. 3   | RERE         | XLOC_000378 | 3978  | coding | coding    | coding    | coding    |
| MSTRG. 741. 1   | SLC2A7       | XLOC_000401 | 255   | coding | noncoding | noncoding | noncoding |
| MSTRG. 742. 1   | SLC2A7       | XLOC_000402 | 365   | coding | noncoding | noncoding | noncoding |
| MSTRG. 744. 1   |              | XLOC_000407 | 221   | coding | coding    | noncoding | noncoding |
| MSTRG. 772. 1   | LNCTAM34A    | XLOC_000415 | 272   | coding | noncoding | noncoding | noncoding |
| XM_017002865. 2 | H6PD         | XLOC_000420 | 11394 | coding | coding    | coding    | coding    |
| MSTRG. 777. 1   |              | XLOC_000425 | 286   | coding | noncoding | noncoding | noncoding |
| MSTRG. 789. 1   |              | XLOC_000426 | 264   | coding | noncoding | noncoding | noncoding |
| MSTRG. 791. 1   |              | XLOC_000427 | 224   | coding | noncoding | noncoding | noncoding |
| MSTRG. 819. 1   |              | XLOC_000446 | 276   | coding | noncoding | noncoding | noncoding |
| MSTRG. 851. 1   | UBE4B        | XLOC_000451 | 261   | coding | noncoding | noncoding | noncoding |

|                |              |             |      |        |           |           |           |
|----------------|--------------|-------------|------|--------|-----------|-----------|-----------|
| XM_005263470.5 | PEX14        | XLOC_000476 | 5077 | coding | coding    | coding    | coding    |
| MSTRG.930.1    | PEX14        | XLOC_000477 | 1008 | coding | noncoding | noncoding | noncoding |
| MSTRG.931.1    | PEX14        | XLOC_000478 | 228  | coding | noncoding | noncoding | noncoding |
| MSTRG.860.1    |              | XLOC_000498 | 288  | coding | noncoding | noncoding | noncoding |
| MSTRG.862.1    |              | XLOC_000500 | 307  | coding | noncoding | noncoding | noncoding |
| MSTRG.864.1    |              | XLOC_000502 | 309  | coding | noncoding | noncoding | noncoding |
| MSTRG.1019.5   | MTOR         | XLOC_000510 | 218  | coding | noncoding | noncoding | noncoding |
| NM_021146.4    | ANGPTL7      | XLOC_000511 | 2224 | coding | coding    | coding    | coding    |
| NM_001330350.1 | UBIAD1       | XLOC_000513 | 5563 | coding | coding    | coding    | coding    |
| MSTRG.1025.1   | UBIAD1       | XLOC_000515 | 290  | coding | noncoding | noncoding | noncoding |
| NM_020780.2    | DISP3        | XLOC_000523 | 5265 | coding | coding    | coding    | coding    |
| MSTRG.952.1    | DISP3        | XLOC_000524 | 266  | coding | noncoding | noncoding | noncoding |
| NM_001256959.1 | CLCN6        | XLOC_000543 | 5632 | coding | coding    | coding    | coding    |
| MSTRG.1056.1   | NPPA         | XLOC_000545 | 233  | coding | noncoding | noncoding | noncoding |
| MSTRG.1035.1   |              | XLOC_000550 | 224  | coding | noncoding | noncoding | noncoding |
| MSTRG.1040.1   | PLOD1        | XLOC_000552 | 229  | coding | noncoding | noncoding | noncoding |
| MSTRG.1063.1   | MFN2         | XLOC_000555 | 304  | coding | noncoding | noncoding | noncoding |
| MSTRG.1064.1   | MFN2         | XLOC_000556 | 229  | coding | noncoding | noncoding | noncoding |
| XM_017002211.1 | TNFRSF1B     | XLOC_000569 | 2411 | coding | coding    | coding    | coding    |
| XM_017002215.1 | TNFRSF1B     | XLOC_000569 | 3632 | coding | coding    | coding    | coding    |
| XM_011542060.2 | TNFRSF1B     | XLOC_000569 | 3801 | coding | coding    | coding    | coding    |
| MSTRG.1079.1   |              | XLOC_000597 | 243  | coding | coding    | noncoding | noncoding |
| NM_001080830.4 | PRAMEF12     | XLOC_000602 | 1779 | coding | noncoding | coding    | coding    |
| MSTRG.1116.1   | LOC107984919 | XLOC_000626 | 272  | coding | noncoding | noncoding | noncoding |
| XM_017002255.1 | PRDM2        | XLOC_000630 | 7189 | coding | coding    | coding    | coding    |
| MSTRG.1264.1   | KAZN         | XLOC_000654 | 287  | coding | noncoding | noncoding | noncoding |
| MSTRG.1276.1   | KAZN         | XLOC_000660 | 216  | coding | noncoding | noncoding | noncoding |
| MSTRG.1301.1   | KAZN-AS1     | XLOC_000669 | 307  | coding | noncoding | noncoding | noncoding |
| MSTRG.1314.1   | KAZN         | XLOC_000674 | 215  | coding | noncoding | noncoding | noncoding |
| MSTRG.1315.1   | KAZN         | XLOC_000675 | 295  | coding | noncoding | noncoding | noncoding |
| MSTRG.1324.1   | LOC105376759 | XLOC_000678 | 759  | coding | noncoding | noncoding | noncoding |
| MSTRG.1346.1   | KAZN         | XLOC_000684 | 288  | coding | noncoding | noncoding | noncoding |
| MSTRG.1347.1   | KAZN         | XLOC_000685 | 225  | coding | noncoding | noncoding | noncoding |
| MSTRG.1363.1   | TMEM51-AS1   | XLOC_000689 | 271  | coding | noncoding | noncoding | noncoding |
| MSTRG.1366.1   | TMEM51       | XLOC_000691 | 227  | coding | noncoding | noncoding | noncoding |
| XM_011540595.2 | FHAD1        | XLOC_000695 | 4488 | coding | noncoding | coding    | coding    |
| MSTRG.1175.1   | FHAD1        | XLOC_000698 | 250  | coding | noncoding | noncoding | noncoding |
| MSTRG.1148.1   | CTRC         | XLOC_000713 | 235  | coding | noncoding | noncoding | noncoding |
| MSTRG.1162.1   |              | XLOC_000725 | 267  | coding | noncoding | noncoding | noncoding |
| XM_011541292.2 | SLC25A34     | XLOC_000736 | 4373 | coding | coding    | coding    | coding    |
| MSTRG.1372.1   |              | XLOC_000750 | 211  | coding | noncoding | noncoding | noncoding |
| MSTRG.1383.1   |              | XLOC_000760 | 809  | coding | noncoding | noncoding | noncoding |
| NM_001114600.3 | SZRD1        | XLOC_000772 | 3480 | coding | coding    | coding    | noncoding |

|                 |              |             |      |        |           |           |           |
|-----------------|--------------|-------------|------|--------|-----------|-----------|-----------|
| MSTRG. 1419. 1  | SPATA21      | XLOC_000773 | 205  | coding | noncoding | noncoding | noncoding |
| MSTRG. 1420. 1  | SPATA21      | XLOC_000774 | 263  | coding | noncoding | noncoding | noncoding |
| MSTRG. 1423. 1  |              | XLOC_000783 | 225  | coding | noncoding | noncoding | noncoding |
| MSTRG. 1426. 1  | LINC01783    | XLOC_000784 | 266  | coding | noncoding | noncoding | noncoding |
| MSTRG. 1448. 1  |              | XLOC_000799 | 405  | coding | noncoding | noncoding | noncoding |
| MSTRG. 1502. 1  | ATP13A2      | XLOC_000815 | 200  | coding | noncoding | noncoding | noncoding |
| MSTRG. 1556. 1  | IGSF21       | XLOC_000852 | 317  | coding | noncoding | noncoding | noncoding |
| MSTRG. 1548. 1  |              | XLOC_000860 | 229  | coding | noncoding | noncoding | noncoding |
| NM_152375. 2    | KLHDC7A      | XLOC_000861 | 5070 | coding | coding    | coding    | coding    |
| NM_001135254. 2 | PAX7         | XLOC_000863 | 6213 | coding | coding    | coding    | coding    |
| MSTRG. 1580. 1  | PAX7         | XLOC_000864 | 236  | coding | noncoding | noncoding | noncoding |
| MSTRG. 1774. 1  | LOC105376815 | XLOC_000883 | 285  | coding | noncoding | noncoding | noncoding |
| NM_001204086. 2 | NBL1         | XLOC_000909 | 2160 | coding | coding    | coding    | coding    |
| MSTRG. 1640. 1  | MICOS10      | XLOC_000913 | 280  | coding | noncoding | noncoding | noncoding |
| MSTRG. 1682. 1  |              | XLOC_000937 | 214  | coding | noncoding | noncoding | noncoding |
| MSTRG. 1677. 1  |              | XLOC_000938 | 322  | coding | noncoding | noncoding | noncoding |
| MSTRG. 1693. 1  | PLA2G5       | XLOC_000942 | 285  | coding | noncoding | noncoding | noncoding |
| NM_022819. 4    | PLA2G2F      | XLOC_000946 | 2721 | coding | coding    | coding    | coding    |
| MSTRG. 1752. 1  | LINC01141    | XLOC_000956 | 291  | coding | noncoding | noncoding | noncoding |
| MSTRG. 1743. 1  |              | XLOC_000960 | 329  | coding | noncoding | noncoding | noncoding |
| MSTRG. 1756. 1  |              | XLOC_000969 | 302  | coding | noncoding | noncoding | noncoding |
| MSTRG. 1802. 1  | KIF17        | XLOC_000974 | 367  | coding | noncoding | noncoding | noncoding |
| MSTRG. 1804. 1  | KIF17        | XLOC_000975 | 270  | coding | noncoding | noncoding | noncoding |
| MSTRG. 1895. 8  | EIF4G3       | XLOC_000981 | 5477 | coding | coding    | coding    | coding    |
| MSTRG. 1824. 1  | ECE1         | XLOC_000983 | 5735 | coding | coding    | coding    | coding    |
| MSTRG. 1815. 1  |              | XLOC_000984 | 215  | coding | noncoding | noncoding | noncoding |
| MSTRG. 1816. 1  |              | XLOC_000985 | 261  | coding | noncoding | noncoding | noncoding |
| XM_024450190. 1 | NBPF3        | XLOC_000988 | 5209 | coding | coding    | coding    | coding    |
| MSTRG. 1855. 1  | ALPL         | XLOC_000992 | 276  | coding | noncoding | noncoding | noncoding |
| MSTRG. 1857. 1  | ALPL         | XLOC_000994 | 223  | coding | noncoding | noncoding | noncoding |
| MSTRG. 1835. 1  |              | XLOC_000996 | 326  | coding | noncoding | noncoding | noncoding |
| MSTRG. 1925. 8  | USP48        | XLOC_001004 | 1443 | coding | coding    | coding    | noncoding |
| MSTRG. 1876. 1  | HSPG2        | XLOC_001007 | 242  | coding | coding    | noncoding | noncoding |
| MSTRG. 1971. 1  |              | XLOC_001024 | 447  | coding | noncoding | noncoding | noncoding |
| MSTRG. 2004. 1  | ZBTB40       | XLOC_001040 | 229  | coding | noncoding | noncoding | noncoding |
| MSTRG. 1936. 1  | LACTBL1      | XLOC_001063 | 216  | coding | noncoding | noncoding | noncoding |
| MSTRG. 2039. 1  |              | XLOC_001087 | 272  | coding | noncoding | noncoding | noncoding |
| MSTRG. 2041. 1  |              | XLOC_001088 | 297  | coding | noncoding | noncoding | noncoding |
| MSTRG. 2057. 1  |              | XLOC_001092 | 268  | coding | noncoding | noncoding | noncoding |
| MSTRG. 2062. 1  | ELOA-AS1     | XLOC_001095 | 230  | coding | noncoding | noncoding | noncoding |
| MSTRG. 2063. 1  | ELOA-AS1     | XLOC_001096 | 260  | coding | noncoding | noncoding | noncoding |
| MSTRG. 2081. 3  | FUCA1        | XLOC_001106 | 779  | coding | coding    | noncoding | noncoding |
| MSTRG. 2103. 1  |              | XLOC_001124 | 268  | coding | noncoding | noncoding | noncoding |

|                |          |             |      |        |           |           |           |
|----------------|----------|-------------|------|--------|-----------|-----------|-----------|
| XM_011541870.2 | GRHL3    | XLOC_001127 | 2671 | coding | coding    | coding    | coding    |
| NM_001010980.5 | NCMAP    | XLOC_001149 | 3980 | coding | noncoding | coding    | noncoding |
| MSTRG.2196.1   | NCMAP    | XLOC_001150 | 230  | coding | noncoding | noncoding | noncoding |
| MSTRG.2201.1   | NCMAP    | XLOC_001152 | 270  | coding | noncoding | noncoding | noncoding |
| NM_001366585.1 | SRRM1    | XLOC_001154 | 5843 | coding | coding    | coding    | coding    |
| NR_159383.1    | SRRM1    | XLOC_001154 | 3946 | coding | coding    | coding    | coding    |
| MSTRG.2174.1   |          | XLOC_001171 | 242  | coding | noncoding | noncoding | noncoding |
| MSTRG.2193.1   |          | XLOC_001184 | 233  | coding | noncoding | noncoding | noncoding |
| MSTRG.2247.10  | RSRP1    | XLOC_001188 | 5516 | coding | noncoding | coding    | coding    |
| MSTRG.2254.1   | TMEM50A  | XLOC_001193 | 262  | coding | noncoding | noncoding | noncoding |
| MSTRG.2268.1   |          | XLOC_001222 | 305  | coding | noncoding | noncoding | noncoding |
| MSTRG.2280.1   |          | XLOC_001228 | 474  | coding | noncoding | noncoding | noncoding |
| MSTRG.2310.1   | CATSPER4 | XLOC_001238 | 247  | coding | noncoding | noncoding | noncoding |
| MSTRG.2334.7   | UBXN11   | XLOC_001244 | 710  | coding | coding    | coding    | coding    |
| MSTRG.2342.2   | HMG2     | XLOC_001252 | 1046 | coding | coding    | noncoding | noncoding |
| NM_001202554.1 | PIGV     | XLOC_001271 | 2730 | coding | coding    | coding    | coding    |
| MSTRG.2354.1   | ZDHHC18  | XLOC_001276 | 274  | coding | noncoding | noncoding | noncoding |
| MSTRG.2357.1   |          | XLOC_001283 | 264  | coding | noncoding | noncoding | noncoding |
| MSTRG.2399.1   |          | XLOC_001295 | 586  | coding | coding    | noncoding | noncoding |
| MSTRG.2401.1   |          | XLOC_001296 | 346  | coding | noncoding | noncoding | noncoding |
| MSTRG.2402.1   |          | XLOC_001297 | 227  | coding | noncoding | noncoding | noncoding |
| MSTRG.2421.1   | WDTC1    | XLOC_001300 | 295  | coding | noncoding | noncoding | noncoding |
| MSTRG.2441.1   |          | XLOC_001318 | 208  | coding | noncoding | noncoding | noncoding |
| MSTRG.2475.1   |          | XLOC_001335 | 297  | coding | noncoding | noncoding | noncoding |
| MSTRG.2478.1   |          | XLOC_001337 | 279  | coding | noncoding | noncoding | noncoding |
| XM_017000543.2 | FAM76A   | XLOC_001339 | 2139 | coding | coding    | coding    | coding    |
| MSTRG.2491.1   | FAM76A   | XLOC_001340 | 288  | coding | noncoding | noncoding | noncoding |
| MSTRG.2496.1   | STX12    | XLOC_001342 | 260  | coding | noncoding | noncoding | noncoding |
| MSTRG.2504.1   |          | XLOC_001348 | 278  | coding | noncoding | noncoding | noncoding |
| MSTRG.2506.1   |          | XLOC_001358 | 200  | coding | noncoding | noncoding | noncoding |
| MSTRG.2522.1   | PTAFR    | XLOC_001369 | 239  | coding | noncoding | noncoding | noncoding |
| MSTRG.2532.1   | PHACTR4  | XLOC_001376 | 299  | coding | noncoding | noncoding | noncoding |
| MSTRG.2535.1   | PHACTR4  | XLOC_001379 | 301  | coding | noncoding | noncoding | noncoding |
| MSTRG.2578.1   | RCC1     | XLOC_001386 | 222  | coding | noncoding | noncoding | noncoding |
| MSTRG.2582.1   | TRNAU1AP | XLOC_001389 | 274  | coding | noncoding | noncoding | noncoding |
| MSTRG.2583.1   | TRNAU1AP | XLOC_001390 | 226  | coding | noncoding | noncoding | noncoding |
| MSTRG.2623.1   | OPRD1    | XLOC_001402 | 315  | coding | noncoding | noncoding | noncoding |
| NM_203343.3    | EPB41    | XLOC_001403 | 5675 | coding | coding    | coding    | coding    |
| MSTRG.2626.22  | EPB41    | XLOC_001403 | 3906 | coding | coding    | coding    | coding    |
| MSTRG.2606.1   |          | XLOC_001404 | 261  | coding | noncoding | noncoding | noncoding |
| MSTRG.2610.1   |          | XLOC_001410 | 223  | coding | noncoding | noncoding | noncoding |
| MSTRG.2668.1   |          | XLOC_001427 | 274  | coding | noncoding | noncoding | noncoding |
| MSTRG.2702.1   |          | XLOC_001456 | 289  | coding | noncoding | noncoding | noncoding |

|                 |              |             |      |        |           |           |           |
|-----------------|--------------|-------------|------|--------|-----------|-----------|-----------|
| MSTRG. 2750. 1  |              | XLOC_001480 | 270  | coding | noncoding | noncoding | noncoding |
| MSTRG. 2751. 1  |              | XLOC_001481 | 309  | coding | noncoding | noncoding | noncoding |
| MSTRG. 2752. 1  |              | XLOC_001482 | 443  | coding | noncoding | noncoding | noncoding |
| MSTRG. 2753. 1  |              | XLOC_001483 | 370  | coding | noncoding | noncoding | noncoding |
| MSTRG. 2762. 1  | NKAIN1       | XLOC_001488 | 278  | coding | noncoding | noncoding | noncoding |
| MSTRG. 2764. 1  | NKAIN1       | XLOC_001489 | 222  | coding | noncoding | noncoding | noncoding |
| MSTRG. 2821. 1  | ZCCHC17      | XLOC_001499 | 281  | coding | noncoding | noncoding | noncoding |
| MSTRG. 2822. 1  | FABP3        | XLOC_001500 | 226  | coding | noncoding | noncoding | noncoding |
| MSTRG. 2782. 1  | LOC107985470 | XLOC_001503 | 247  | coding | noncoding | noncoding | noncoding |
| MSTRG. 2789. 1  | LOC105379772 | XLOC_001508 | 216  | coding | noncoding | noncoding | noncoding |
| MSTRG. 2802. 1  |              | XLOC_001514 | 305  | coding | noncoding | noncoding | noncoding |
| NM_022164. 3    | TINAGL1      | XLOC_001515 | 2207 | coding | coding    | coding    | coding    |
| MSTRG. 2840. 9  | HCRTR1       | XLOC_001518 | 1321 | coding | coding    | noncoding | noncoding |
| MSTRG. 2824. 1  |              | XLOC_001523 | 273  | coding | noncoding | noncoding | noncoding |
| MSTRG. 2825. 1  |              | XLOC_001525 | 201  | coding | noncoding | noncoding | noncoding |
| MSTRG. 2835. 1  |              | XLOC_001532 | 336  | coding | noncoding | noncoding | noncoding |
| MSTRG. 2869. 1  |              | XLOC_001538 | 280  | coding | noncoding | noncoding | noncoding |
| NM_001301011. 2 | CCDC28B      | XLOC_001544 | 1453 | coding | coding    | coding    | coding    |
| XM_017002306. 2 | CCDC28B      | XLOC_001544 | 898  | coding | coding    | coding    | coding    |
| MSTRG. 2894. 1  |              | XLOC_001555 | 282  | coding | noncoding | noncoding | noncoding |
| MSTRG. 2897. 1  | ZBTB8B       | XLOC_001557 | 244  | coding | noncoding | noncoding | noncoding |
| MSTRG. 2898. 1  | ZBTB8B       | XLOC_001558 | 209  | coding | noncoding | noncoding | noncoding |
| MSTRG. 2902. 1  | ZBTB8A       | XLOC_001560 | 291  | coding | noncoding | noncoding | noncoding |
| MSTRG. 2927. 1  | RBBP4        | XLOC_001566 | 302  | coding | noncoding | noncoding | noncoding |
| MSTRG. 2915. 1  |              | XLOC_001568 | 270  | coding | noncoding | noncoding | noncoding |
| MSTRG. 2917. 1  |              | XLOC_001569 | 244  | coding | noncoding | noncoding | noncoding |
| MSTRG. 2977. 1  |              | XLOC_001616 | 318  | coding | noncoding | noncoding | noncoding |
| MSTRG. 2982. 1  |              | XLOC_001618 | 300  | coding | noncoding | noncoding | noncoding |
| MSTRG. 3060. 1  | ZSCAN20      | XLOC_001635 | 249  | coding | noncoding | noncoding | noncoding |
| MSTRG. 3055. 1  |              | XLOC_001636 | 264  | coding | noncoding | noncoding | noncoding |
| MSTRG. 3079. 1  |              | XLOC_001659 | 229  | coding | noncoding | noncoding | noncoding |
| MSTRG. 3095. 1  | LOC105378641 | XLOC_001667 | 467  | coding | coding    | noncoding | noncoding |
| MSTRG. 3102. 1  |              | XLOC_001679 | 241  | coding | noncoding | noncoding | noncoding |
| MSTRG. 3179. 1  | ZMYM1        | XLOC_001705 | 430  | coding | noncoding | noncoding | noncoding |
| MSTRG. 3160. 1  |              | XLOC_001706 | 247  | coding | noncoding | noncoding | noncoding |
| MSTRG. 3202. 1  | ZMYM4        | XLOC_001716 | 217  | coding | noncoding | noncoding | noncoding |
| MSTRG. 3191. 1  |              | XLOC_001738 | 337  | coding | noncoding | noncoding | noncoding |
| MSTRG. 3274. 1  |              | XLOC_001742 | 316  | coding | noncoding | noncoding | noncoding |
| MSTRG. 3275. 1  |              | XLOC_001743 | 306  | coding | noncoding | noncoding | noncoding |
| XR_001737019. 1 | AGO4         | XLOC_001744 | 5104 | coding | coding    | coding    | coding    |
| MSTRG. 3283. 1  | AGO4         | XLOC_001749 | 469  | coding | noncoding | noncoding | noncoding |
| MSTRG. 3284. 1  | AGO4         | XLOC_001750 | 231  | coding | noncoding | noncoding | noncoding |
| MSTRG. 3290. 1  | AGO1         | XLOC_001754 | 277  | coding | noncoding | noncoding | noncoding |

|                 |            |             |       |        |           |           |           |
|-----------------|------------|-------------|-------|--------|-----------|-----------|-----------|
| MSTRG. 3293. 1  | AGO3       | XLOC_001756 | 296   | coding | noncoding | noncoding | noncoding |
| MSTRG. 3250. 3  | ADPRHL2    | XLOC_001764 | 244   | coding | noncoding | noncoding | noncoding |
| MSTRG. 3249. 1  |            | XLOC_001766 | 266   | coding | noncoding | noncoding | noncoding |
| MSTRG. 3259. 1  | TRAPPC3    | XLOC_001770 | 222   | coding | noncoding | noncoding | noncoding |
| MSTRG. 3352. 1  | THRAP3     | XLOC_001776 | 316   | coding | noncoding | noncoding | noncoding |
| MSTRG. 3360. 2  | STK40      | XLOC_001779 | 3648  | coding | coding    | coding    | coding    |
| MSTRG. 3360. 6  | STK40      | XLOC_001779 | 3144  | coding | coding    | coding    | noncoding |
| MSTRG. 3307. 1  |            | XLOC_001787 | 248   | coding | noncoding | noncoding | noncoding |
| MSTRG. 3421. 1  | EPHA10     | XLOC_001819 | 279   | coding | noncoding | noncoding | noncoding |
| MSTRG. 3527. 1  | GJA9-MYCBP | XLOC_001860 | 258   | coding | noncoding | noncoding | noncoding |
| MSTRG. 3534. 1  | RHBDL2     | XLOC_001864 | 309   | coding | noncoding | noncoding | noncoding |
| MSTRG. 3507. 1  |            | XLOC_001865 | 303   | coding | noncoding | noncoding | noncoding |
| MSTRG. 3515. 1  | AKIRIN1    | XLOC_001868 | 325   | coding | noncoding | noncoding | noncoding |
| NM_001184979. 1 | NDUFS5     | XLOC_001869 | 567   | coding | coding    | coding    | noncoding |
| MSTRG. 3652. 1  | MACF1      | XLOC_001872 | 306   | coding | noncoding | noncoding | noncoding |
| MSTRG. 3665. 1  | MACF1      | XLOC_001877 | 278   | coding | noncoding | noncoding | noncoding |
| MSTRG. 3674. 1  | MACF1      | XLOC_001885 | 292   | coding | noncoding | noncoding | noncoding |
| MSTRG. 3681. 1  | MACF1      | XLOC_001892 | 291   | coding | noncoding | noncoding | noncoding |
| MSTRG. 3685. 1  | MACF1      | XLOC_001896 | 244   | coding | noncoding | noncoding | noncoding |
| NM_181809. 4    | BMP8A      | XLOC_001897 | 5636  | coding | coding    | coding    | coding    |
| MSTRG. 3557. 5  | PABPC4-AS1 | XLOC_001905 | 3259  | coding | coding    | coding    | noncoding |
| MSTRG. 3549. 1  |            | XLOC_001906 | 458   | coding | noncoding | noncoding | noncoding |
| MSTRG. 3575. 1  | PPIE       | XLOC_001912 | 302   | coding | noncoding | noncoding | noncoding |
| MSTRG. 3569. 1  | LINC02811  | XLOC_001918 | 264   | coding | noncoding | noncoding | noncoding |
| MSTRG. 3607. 1  |            | XLOC_001939 | 272   | coding | noncoding | noncoding | noncoding |
| MSTRG. 3727. 1  |            | XLOC_001980 | 265   | coding | noncoding | noncoding | noncoding |
| MSTRG. 3764. 1  | RIMS3      | XLOC_001992 | 222   | coding | noncoding | noncoding | noncoding |
| MSTRG. 3745. 1  |            | XLOC_002001 | 342   | coding | noncoding | noncoding | noncoding |
| MSTRG. 3748. 1  |            | XLOC_002004 | 238   | coding | noncoding | noncoding | noncoding |
| MSTRG. 4155. 1  | HIVEP3     | XLOC_002103 | 681   | coding | noncoding | noncoding | noncoding |
| MSTRG. 3823. 1  |            | XLOC_002143 | 279   | coding | coding    | noncoding | noncoding |
| MSTRG. 3818. 1  |            | XLOC_002144 | 262   | coding | noncoding | noncoding | noncoding |
| MSTRG. 3828. 1  |            | XLOC_002148 | 222   | coding | noncoding | noncoding | noncoding |
| MSTRG. 3907. 1  | ZMYND12    | XLOC_002156 | 427   | coding | noncoding | noncoding | noncoding |
| MSTRG. 3942. 1  | PPIH       | XLOC_002172 | 224   | coding | noncoding | noncoding | noncoding |
| NR_104171. 1    | LOC339539  | XLOC_002181 | 2365  | coding | coding    | coding    | coding    |
| MSTRG. 3883. 1  |            | XLOC_002191 | 248   | coding | noncoding | noncoding | noncoding |
| MSTRG. 3894. 1  |            | XLOC_002195 | 418   | coding | noncoding | noncoding | noncoding |
| XM_005270467. 4 | TMEM125    | XLOC_002198 | 2375  | coding | coding    | coding    | coding    |
| XM_006710869. 1 | TIE1       | XLOC_002199 | 4114  | coding | coding    | coding    | coding    |
| MSTRG. 3952. 7  | TIE1       | XLOC_002199 | 458   | coding | coding    | coding    | noncoding |
| XM_011541107. 2 | SZT2       | XLOC_002208 | 10660 | coding | noncoding | noncoding | coding    |
| MSTRG. 3990. 1  | SZT2       | XLOC_002209 | 213   | coding | noncoding | noncoding | noncoding |

|                 |              |             |      |        |           |           |           |
|-----------------|--------------|-------------|------|--------|-----------|-----------|-----------|
| MSTRG. 3963. 1  |              | XLOC_002214 | 323  | coding | noncoding | noncoding | noncoding |
| MSTRG. 3964. 1  |              | XLOC_002215 | 273  | coding | noncoding | noncoding | noncoding |
| XM_005271079. 3 | PTPRF        | XLOC_002216 | 7788 | coding | coding    | coding    | coding    |
| MSTRG. 3965. 1  |              | XLOC_002219 | 277  | coding | noncoding | noncoding | noncoding |
| MSTRG. 4021. 6  | B4GALT2      | XLOC_002242 | 417  | coding | coding    | noncoding | noncoding |
| MSTRG. 4018. 1  | KLF17        | XLOC_002250 | 302  | coding | noncoding | noncoding | noncoding |
| MSTRG. 4315. 1  | ZSWIM5       | XLOC_002307 | 396  | coding | noncoding | coding    | coding    |
| MSTRG. 4340. 1  |              | XLOC_002336 | 280  | coding | noncoding | noncoding | noncoding |
| MSTRG. 4358. 1  | CCDC17       | XLOC_002345 | 302  | coding | noncoding | noncoding | noncoding |
| MSTRG. 4372. 4  | GPBP1L1      | XLOC_002347 | 3337 | coding | coding    | coding    | noncoding |
| MSTRG. 4375. 1  | TMEM69       | XLOC_002349 | 235  | coding | noncoding | noncoding | noncoding |
| XM_005270655. 3 | MAST2        | XLOC_002355 | 5458 | coding | coding    | coding    | coding    |
| MSTRG. 4383. 1  |              | XLOC_002374 | 503  | coding | noncoding | noncoding | noncoding |
| MSTRG. 4437. 1  |              | XLOC_002380 | 292  | coding | noncoding | noncoding | noncoding |
| MSTRG. 4430. 1  |              | XLOC_002383 | 274  | coding | noncoding | noncoding | noncoding |
| NM_172225. 2    | DMBX1        | XLOC_002387 | 5050 | coding | coding    | coding    | coding    |
| MSTRG. 4458. 6  | MKNK1-AS1    | XLOC_002389 | 2361 | coding | coding    | noncoding | coding    |
| MSTRG. 4483. 1  | CYP4Z2P      | XLOC_002405 | 276  | coding | noncoding | noncoding | noncoding |
| MSTRG. 4497. 1  |              | XLOC_002410 | 265  | coding | noncoding | noncoding | noncoding |
| MSTRG. 4501. 1  | CYP4X1       | XLOC_002412 | 325  | coding | noncoding | noncoding | noncoding |
| MSTRG. 4585. 5  | STIL         | XLOC_002424 | 2970 | coding | coding    | noncoding | coding    |
| MSTRG. 4531. 1  |              | XLOC_002436 | 288  | coding | noncoding | noncoding | noncoding |
| MSTRG. 4605. 1  | SKINT1L      | XLOC_002459 | 560  | coding | noncoding | noncoding | noncoding |
| MSTRG. 4729. 1  | AGBL4        | XLOC_002515 | 295  | coding | noncoding | noncoding | noncoding |
| MSTRG. 4738. 1  | AGBL4        | XLOC_002519 | 381  | coding | noncoding | noncoding | noncoding |
| MSTRG. 4747. 1  | AGBL4        | XLOC_002524 | 304  | coding | noncoding | noncoding | noncoding |
| MSTRG. 4649. 1  | ELAVL4       | XLOC_002532 | 276  | coding | noncoding | noncoding | noncoding |
| MSTRG. 4807. 1  | LOC105378720 | XLOC_002563 | 309  | coding | noncoding | noncoding | noncoding |
| MSTRG. 4812. 1  | RAB3B        | XLOC_002566 | 246  | coding | noncoding | noncoding | noncoding |
| MSTRG. 4815. 1  |              | XLOC_002567 | 425  | coding | noncoding | noncoding | noncoding |
| XM_017002845. 1 | ZFYVE9       | XLOC_002577 | 4324 | coding | coding    | coding    | coding    |
| MSTRG. 4864. 1  | ZFYVE9       | XLOC_002579 | 281  | coding | noncoding | noncoding | noncoding |
| MSTRG. 4869. 1  | ZFYVE9       | XLOC_002581 | 281  | coding | coding    | noncoding | noncoding |
| MSTRG. 4873. 1  | ZFYVE9       | XLOC_002582 | 289  | coding | noncoding | noncoding | noncoding |
| MSTRG. 4875. 1  | ZFYVE9       | XLOC_002583 | 253  | coding | noncoding | noncoding | noncoding |
| MSTRG. 4926. 9  | TUT4         | XLOC_002596 | 3160 | coding | coding    | noncoding | noncoding |
| MSTRG. 4887. 1  |              | XLOC_002600 | 244  | coding | coding    | noncoding | noncoding |
| MSTRG. 4907. 1  | SHISAL2A     | XLOC_002611 | 253  | coding | noncoding | noncoding | noncoding |
| MSTRG. 4912. 1  |              | XLOC_002613 | 298  | coding | noncoding | noncoding | noncoding |
| MSTRG. 4961. 1  | ZYG11B       | XLOC_002620 | 237  | coding | noncoding | noncoding | noncoding |
| MSTRG. 4962. 1  | ZYG11B       | XLOC_002621 | 311  | coding | noncoding | noncoding | noncoding |
| XM_017000294. 2 | PODN         | XLOC_002632 | 3648 | coding | coding    | coding    | coding    |
| MSTRG. 5015. 1  | LRP8         | XLOC_002645 | 201  | coding | coding    | noncoding | noncoding |

|                |              |             |      |        |           |           |           |
|----------------|--------------|-------------|------|--------|-----------|-----------|-----------|
| NR_037639.2    | MROH7-TTC4   | XLOC_002699 | 6486 | coding | noncoding | coding    | coding    |
| MSTRG.5109.1   |              | XLOC_002716 | 309  | coding | noncoding | noncoding | noncoding |
| MSTRG.5110.1   |              | XLOC_002717 | 240  | coding | noncoding | noncoding | noncoding |
| MSTRG.5114.1   |              | XLOC_002722 | 381  | coding | coding    | noncoding | noncoding |
| MSTRG.5118.1   |              | XLOC_002723 | 307  | coding | noncoding | noncoding | noncoding |
| MSTRG.5248.9   | USP24        | XLOC_002725 | 3177 | coding | coding    | coding    | noncoding |
| MSTRG.5174.1   |              | XLOC_002728 | 232  | coding | noncoding | noncoding | noncoding |
| MSTRG.5177.1   |              | XLOC_002731 | 288  | coding | noncoding | noncoding | noncoding |
| MSTRG.5200.1   | LOC105378741 | XLOC_002751 | 309  | coding | coding    | noncoding | noncoding |
| MSTRG.5210.1   |              | XLOC_002762 | 249  | coding | noncoding | noncoding | noncoding |
| MSTRG.5387.1   | DAB1         | XLOC_002775 | 257  | coding | noncoding | noncoding | noncoding |
| MSTRG.5428.1   | DAB1         | XLOC_002805 | 213  | coding | noncoding | noncoding | noncoding |
| MSTRG.5234.1   |              | XLOC_002905 | 526  | coding | noncoding | noncoding | noncoding |
| MSTRG.5365.7   | OMA1         | XLOC_002988 | 514  | coding | coding    | noncoding | noncoding |
| MSTRG.5365.9   | OMA1         | XLOC_002988 | 2426 | coding | coding    | noncoding | noncoding |
| MSTRG.5547.6   | MYSM1        | XLOC_002999 | 4157 | coding | coding    | noncoding | noncoding |
| MSTRG.5373.1   | LOC112268263 | XLOC_003002 | 237  | coding | noncoding | noncoding | noncoding |
| MSTRG.5374.1   | LOC112268263 | XLOC_003003 | 296  | coding | noncoding | noncoding | noncoding |
| MSTRG.5559.1   |              | XLOC_003030 | 383  | coding | noncoding | noncoding | noncoding |
| XM_017001656.1 | FGGY         | XLOC_003033 | 2122 | coding | coding    | coding    | coding    |
| MSTRG.6041.1   | FGGY         | XLOC_003036 | 256  | coding | noncoding | noncoding | noncoding |
| MSTRG.6067.1   | FGGY         | XLOC_003054 | 250  | coding | noncoding | noncoding | noncoding |
| MSTRG.5651.1   |              | XLOC_003062 | 285  | coding | noncoding | noncoding | noncoding |
| MSTRG.5710.1   |              | XLOC_003085 | 302  | coding | noncoding | noncoding | noncoding |
| MSTRG.5717.1   |              | XLOC_003088 | 248  | coding | noncoding | noncoding | noncoding |
| MSTRG.5718.1   |              | XLOC_003105 | 218  | coding | noncoding | noncoding | noncoding |
| MSTRG.5721.1   |              | XLOC_003108 | 306  | coding | noncoding | noncoding | noncoding |
| MSTRG.5727.1   |              | XLOC_003112 | 233  | coding | noncoding | noncoding | noncoding |
| XM_005270347.2 | PATJ         | XLOC_003124 | 4274 | coding | coding    | coding    | coding    |
| MSTRG.5804.1   | PATJ         | XLOC_003134 | 271  | coding | noncoding | noncoding | noncoding |
| MSTRG.5809.1   | PATJ         | XLOC_003138 | 231  | coding | noncoding | noncoding | noncoding |
| MSTRG.5754.1   |              | XLOC_003143 | 303  | coding | noncoding | noncoding | noncoding |
| MSTRG.5787.1   |              | XLOC_003162 | 237  | coding | noncoding | noncoding | noncoding |
| MSTRG.5816.1   | LINC00466    | XLOC_003182 | 250  | coding | noncoding | noncoding | noncoding |
| MSTRG.5821.1   | LINC00466    | XLOC_003184 | 304  | coding | noncoding | noncoding | noncoding |
| MSTRG.5984.1   | ALG6         | XLOC_003187 | 300  | coding | noncoding | noncoding | noncoding |
| XM_011542301.2 | EFCAB7       | XLOC_003199 | 3092 | coding | coding    | coding    | coding    |
| MSTRG.5904.1   | UBE2U        | XLOC_003235 | 256  | coding | noncoding | noncoding | noncoding |
| MSTRG.5889.1   |              | XLOC_003242 | 538  | coding | noncoding | noncoding | noncoding |
| MSTRG.5892.1   |              | XLOC_003245 | 317  | coding | coding    | noncoding | noncoding |
| MSTRG.5897.1   |              | XLOC_003247 | 420  | coding | noncoding | noncoding | noncoding |
| MSTRG.5898.1   |              | XLOC_003248 | 219  | coding | noncoding | noncoding | noncoding |
| MSTRG.6023.1   |              | XLOC_003270 | 242  | coding | noncoding | noncoding | noncoding |

|                 |            |             |       |        |           |           |           |
|-----------------|------------|-------------|-------|--------|-----------|-----------|-----------|
| MSTRG. 6032. 1  | AK4        | XLOC_003275 | 204   | coding | noncoding | noncoding | noncoding |
| NM_001256865. 1 | DNAJC6     | XLOC_003277 | 5916  | coding | coding    | coding    | coding    |
| NM_014787. 4    | DNAJC6     | XLOC_003277 | 5750  | coding | coding    | coding    | coding    |
| NM_017526. 5    | LEPROT     | XLOC_003279 | 4541  | coding | coding    | coding    | coding    |
| MSTRG. 6103. 1  | LEPR       | XLOC_003284 | 415   | coding | noncoding | noncoding | noncoding |
| MSTRG. 6106. 1  | LEPR       | XLOC_003287 | 260   | coding | noncoding | noncoding | noncoding |
| MSTRG. 6094. 1  |            | XLOC_003296 | 263   | coding | noncoding | noncoding | noncoding |
| MSTRG. 6281. 1  | PDE4B      | XLOC_003303 | 258   | coding | noncoding | noncoding | noncoding |
| MSTRG. 6303. 1  | PDE4B      | XLOC_003305 | 239   | coding | noncoding | noncoding | noncoding |
| NM_001350217. 2 | SGIP1      | XLOC_003329 | 10749 | coding | coding    | coding    | coding    |
| MSTRG. 6180. 1  | WDR78      | XLOC_003340 | 250   | coding | noncoding | noncoding | noncoding |
| MSTRG. 6181. 1  | WDR78      | XLOC_003341 | 290   | coding | noncoding | noncoding | noncoding |
| NM_001146110. 2 | MIER1      | XLOC_003343 | 5533  | coding | coding    | coding    | coding    |
| MSTRG. 6172. 1  | IL23R      | XLOC_003365 | 261   | coding | noncoding | noncoding | noncoding |
| MSTRG. 6366. 1  |            | XLOC_003371 | 493   | coding | noncoding | noncoding | noncoding |
| MSTRG. 6368. 7  | SERBP1     | XLOC_003373 | 2510  | coding | coding    | noncoding | noncoding |
| MSTRG. 6349. 1  |            | XLOC_003375 | 223   | coding | noncoding | noncoding | noncoding |
| MSTRG. 6466. 6  | WLS        | XLOC_003385 | 3399  | coding | coding    | coding    | coding    |
| MSTRG. 6468. 1  | GNG12-AS1  | XLOC_003386 | 262   | coding | noncoding | noncoding | noncoding |
| MSTRG. 6471. 1  | GNG12-AS1  | XLOC_003387 | 260   | coding | noncoding | noncoding | noncoding |
| MSTRG. 6375. 1  |            | XLOC_003397 | 271   | coding | noncoding | noncoding | noncoding |
| MSTRG. 6388. 1  |            | XLOC_003409 | 295   | coding | coding    | noncoding | noncoding |
| MSTRG. 6401. 1  |            | XLOC_003413 | 493   | coding | noncoding | noncoding | noncoding |
| MSTRG. 6406. 1  |            | XLOC_003415 | 239   | coding | noncoding | noncoding | noncoding |
| MSTRG. 6431. 1  | LINC01707  | XLOC_003429 | 211   | coding | noncoding | noncoding | noncoding |
| MSTRG. 6434. 1  | LINC01707  | XLOC_003432 | 278   | coding | noncoding | noncoding | noncoding |
| MSTRG. 6446. 1  |            | XLOC_003438 | 298   | coding | noncoding | noncoding | noncoding |
| MSTRG. 6603. 1  | LRRC7      | XLOC_003451 | 228   | coding | noncoding | noncoding | noncoding |
| MSTRG. 6507. 1  |            | XLOC_003468 | 221   | coding | noncoding | noncoding | noncoding |
| XM_005270509. 3 | CTH        | XLOC_003469 | 4258  | coding | coding    | coding    | coding    |
| MSTRG. 6510. 1  |            | XLOC_003473 | 287   | coding | noncoding | noncoding | noncoding |
| MSTRG. 6517. 1  |            | XLOC_003476 | 292   | coding | noncoding | noncoding | noncoding |
| MSTRG. 6730. 1  | NEGR1      | XLOC_003511 | 244   | coding | noncoding | noncoding | noncoding |
| MSTRG. 6774. 1  | NEGR1      | XLOC_003547 | 305   | coding | noncoding | noncoding | noncoding |
| MSTRG. 6654. 1  |            | XLOC_003559 | 254   | coding | noncoding | noncoding | noncoding |
| MSTRG. 6668. 1  |            | XLOC_003564 | 248   | coding | noncoding | noncoding | noncoding |
| MSTRG. 6677. 1  |            | XLOC_003577 | 243   | coding | noncoding | noncoding | noncoding |
| MSTRG. 6702. 1  | LINC02238  | XLOC_003582 | 268   | coding | noncoding | noncoding | noncoding |
| NR_121670. 1    | ERICH3-AS1 | XLOC_003601 | 4967  | coding | noncoding | noncoding | noncoding |
| MSTRG. 6834. 1  |            | XLOC_003609 | 288   | coding | noncoding | noncoding | noncoding |
| MSTRG. 6839. 1  |            | XLOC_003612 | 296   | coding | noncoding | noncoding | noncoding |
| MSTRG. 6872. 1  | ACADM      | XLOC_003626 | 256   | coding | noncoding | noncoding | noncoding |
| MSTRG. 6888. 1  | MSH4       | XLOC_003635 | 285   | coding | noncoding | noncoding | noncoding |

|                 |              |             |       |        |           |           |           |
|-----------------|--------------|-------------|-------|--------|-----------|-----------|-----------|
| MSTRG. 6904. 1  |              | XLOC_003683 | 263   | coding | noncoding | noncoding | noncoding |
| MSTRG. 6915. 1  | ST6GALNAC5   | XLOC_003688 | 262   | coding | noncoding | noncoding | noncoding |
| MSTRG. 6964. 1  | AK5          | XLOC_003704 | 318   | coding | noncoding | noncoding | noncoding |
| MSTRG. 7161. 9  | NEXN         | XLOC_003722 | 10154 | coding | coding    | coding    | coding    |
| MSTRG. 7171. 1  | DNAJB4       | XLOC_003725 | 282   | coding | noncoding | noncoding | noncoding |
| MSTRG. 7176. 1  | DNAJB4       | XLOC_003726 | 200   | coding | noncoding | noncoding | noncoding |
| MSTRG. 6994. 1  |              | XLOC_003728 | 238   | coding | noncoding | noncoding | noncoding |
| MSTRG. 6999. 1  | GIPC2        | XLOC_003730 | 253   | coding | noncoding | noncoding | noncoding |
| MSTRG. 6995. 1  |              | XLOC_003731 | 210   | coding | noncoding | noncoding | noncoding |
| NM_001039585. 2 | PTGFR        | XLOC_003739 | 5500  | coding | coding    | noncoding | coding    |
| MSTRG. 7065. 1  |              | XLOC_003772 | 260   | coding | noncoding | noncoding | noncoding |
| MSTRG. 7077. 1  |              | XLOC_003777 | 258   | coding | coding    | noncoding | noncoding |
| NR_125940. 1    | LINC01781    | XLOC_003782 | 591   | coding | noncoding | noncoding | noncoding |
| MSTRG. 7110. 1  |              | XLOC_003785 | 269   | coding | noncoding | noncoding | noncoding |
| XM_006710485. 3 | ADGRL2       | XLOC_003794 | 6439  | coding | coding    | coding    | coding    |
| MSTRG. 7419. 1  | LINC01362    | XLOC_003832 | 235   | coding | coding    | noncoding | noncoding |
| MSTRG. 7422. 1  | LINC01362    | XLOC_003833 | 639   | coding | noncoding | noncoding | noncoding |
| MSTRG. 7572. 1  | TTLL7        | XLOC_003952 | 278   | coding | noncoding | noncoding | noncoding |
| MSTRG. 7241. 1  |              | XLOC_003956 | 283   | coding | noncoding | noncoding | noncoding |
| XM_005271020. 2 | PRKACB       | XLOC_003961 | 1818  | coding | coding    | coding    | coding    |
| MSTRG. 7386. 19 | SPATA1       | XLOC_003993 | 2530  | coding | coding    | coding    | noncoding |
| MSTRG. 7658. 1  | DDAH1        | XLOC_004044 | 212   | coding | noncoding | noncoding | noncoding |
| MSTRG. 7659. 1  | DDAH1        | XLOC_004045 | 335   | coding | noncoding | noncoding | noncoding |
| MSTRG. 7665. 1  | DDAH1        | XLOC_004047 | 295   | coding | noncoding | noncoding | noncoding |
| MSTRG. 7734. 1  |              | XLOC_004101 | 244   | coding | noncoding | noncoding | noncoding |
| MSTRG. 7738. 1  |              | XLOC_004104 | 269   | coding | noncoding | noncoding | noncoding |
| MSTRG. 7771. 1  | CLCA4        | XLOC_004106 | 248   | coding | noncoding | noncoding | noncoding |
| MSTRG. 7775. 1  | CLCA4-AS1    | XLOC_004109 | 316   | coding | noncoding | noncoding | noncoding |
| MSTRG. 7777. 1  | CLCA4-AS1    | XLOC_004111 | 306   | coding | noncoding | noncoding | noncoding |
| MSTRG. 7779. 1  | CLCA4-AS1    | XLOC_004113 | 353   | coding | noncoding | noncoding | noncoding |
| MSTRG. 7800. 1  |              | XLOC_004159 | 286   | coding | noncoding | noncoding | noncoding |
| MSTRG. 7886. 1  |              | XLOC_004187 | 402   | coding | coding    | noncoding | noncoding |
| MSTRG. 7908. 1  |              | XLOC_004202 | 257   | coding | noncoding | noncoding | noncoding |
| MSTRG. 7929. 1  | PKN2-AS1     | XLOC_004210 | 285   | coding | coding    | noncoding | noncoding |
| MSTRG. 7930. 1  | PKN2-AS1     | XLOC_004211 | 290   | coding | coding    | noncoding | noncoding |
| NM_001320707. 1 | PKN2         | XLOC_004220 | 6055  | coding | coding    | coding    | coding    |
| NM_001320709. 2 | PKN2         | XLOC_004220 | 6022  | coding | coding    | coding    | coding    |
| MSTRG. 7968. 1  | PKN2         | XLOC_004247 | 914   | coding | noncoding | noncoding | noncoding |
| MSTRG. 8354. 25 | LOC112268267 | XLOC_004270 | 5105  | coding | coding    | noncoding | noncoding |
| MSTRG. 8370. 1  | GBP7         | XLOC_004272 | 285   | coding | noncoding | noncoding | noncoding |
| MSTRG. 8431. 1  |              | XLOC_004282 | 523   | coding | noncoding | noncoding | noncoding |
| XM_011542283. 2 | LRRRC8C      | XLOC_004292 | 8759  | coding | coding    | coding    | coding    |
| MSTRG. 8006. 1  |              | XLOC_004363 | 268   | coding | noncoding | noncoding | noncoding |

|                 |              |             |       |        |           |           |           |
|-----------------|--------------|-------------|-------|--------|-----------|-----------|-----------|
| MSTRG. 8022. 1  | LOC105378849 | XLOC_004367 | 260   | coding | noncoding | noncoding | noncoding |
| MSTRG. 8023. 1  | LOC105378849 | XLOC_004368 | 265   | coding | noncoding | noncoding | noncoding |
| MSTRG. 8018. 1  |              | XLOC_004369 | 250   | coding | noncoding | noncoding | noncoding |
| MSTRG. 8036. 1  |              | XLOC_004375 | 253   | coding | noncoding | noncoding | noncoding |
| MSTRG. 8095. 1  |              | XLOC_004392 | 284   | coding | noncoding | noncoding | noncoding |
| MSTRG. 8131. 1  | HFM1         | XLOC_004393 | 287   | coding | noncoding | noncoding | noncoding |
| MSTRG. 8137. 1  | HFM1         | XLOC_004397 | 323   | coding | noncoding | noncoding | noncoding |
| MSTRG. 8202. 1  |              | XLOC_004417 | 277   | coding | noncoding | noncoding | noncoding |
| MSTRG. 8271. 1  | BTBD8        | XLOC_004429 | 267   | coding | noncoding | noncoding | noncoding |
| MSTRG. 8303. 5  | GLMN         | XLOC_004434 | 989   | coding | coding    | noncoding | coding    |
| XR_246295. 3    | RPAP2        | XLOC_004435 | 3087  | coding | coding    | coding    | coding    |
| MSTRG. 8293. 1  |              | XLOC_004449 | 320   | coding | noncoding | noncoding | noncoding |
| NM_000969. 5    | RPL5         | XLOC_004458 | 1028  | coding | coding    | coding    | coding    |
| MSTRG. 8637. 5  | CCDC18       | XLOC_004471 | 12972 | coding | coding    | coding    | coding    |
| XM_011541625. 2 | FBNP1L       | XLOC_004476 | 2327  | coding | coding    | coding    | coding    |
| MSTRG. 8546. 1  | FBNP1L       | XLOC_004481 | 201   | coding | noncoding | noncoding | noncoding |
| MSTRG. 8551. 1  | BCAR3        | XLOC_004484 | 239   | coding | noncoding | noncoding | noncoding |
| MSTRG. 8582. 1  | BCAR3        | XLOC_004505 | 315   | coding | noncoding | noncoding | noncoding |
| MSTRG. 8515. 1  |              | XLOC_004521 | 645   | coding | noncoding | noncoding | noncoding |
| MSTRG. 8618. 1  | LOC105378861 | XLOC_004552 | 298   | coding | noncoding | noncoding | noncoding |
| XM_011540635. 3 | SLC44A3      | XLOC_004563 | 2320  | coding | coding    | coding    | coding    |
| MSTRG. 8768. 1  |              | XLOC_004575 | 565   | coding | noncoding | noncoding | noncoding |
| NM_001199691. 1 | TLCD4-RWDD3  | XLOC_004576 | 1491  | coding | coding    | noncoding | coding    |
| MSTRG. 8770. 4  | TLCD4-RWDD3  | XLOC_004576 | 628   | coding | coding    | noncoding | coding    |
| MSTRG. 8695. 1  |              | XLOC_004591 | 277   | coding | noncoding | noncoding | noncoding |
| MSTRG. 8739. 1  | LOC105378866 | XLOC_004616 | 263   | coding | noncoding | noncoding | noncoding |
| MSTRG. 8781. 1  |              | XLOC_004635 | 535   | coding | noncoding | noncoding | noncoding |
| MSTRG. 8871. 1  | LOC100129620 | XLOC_004678 | 248   | coding | noncoding | noncoding | noncoding |
| MSTRG. 8877. 1  |              | XLOC_004684 | 252   | coding | noncoding | noncoding | noncoding |
| MSTRG. 8897. 1  |              | XLOC_004695 | 418   | coding | noncoding | noncoding | noncoding |
| XM_005270557. 2 | AGL          | XLOC_004703 | 7057  | coding | coding    | coding    | coding    |
| MSTRG. 8915. 8  | AGL          | XLOC_004703 | 415   | coding | coding    | noncoding | noncoding |
| MSTRG. 8912. 1  |              | XLOC_004705 | 249   | coding | noncoding | noncoding | noncoding |
| MSTRG. 8974. 4  | DBT          | XLOC_004719 | 1784  | coding | coding    | noncoding | noncoding |
| MSTRG. 9008. 1  | CDC14A       | XLOC_004734 | 367   | coding | noncoding | noncoding | noncoding |
| MSTRG. 9012. 1  | CDC14A       | XLOC_004738 | 287   | coding | coding    | noncoding | noncoding |
| MSTRG. 8949. 1  |              | XLOC_004780 | 319   | coding | coding    | noncoding | noncoding |
| MSTRG. 9089. 1  | OLFM3        | XLOC_004836 | 352   | coding | coding    | noncoding | noncoding |
| MSTRG. 9097. 1  | OLFM3        | XLOC_004843 | 257   | coding | noncoding | noncoding | noncoding |
| MSTRG. 9106. 1  |              | XLOC_004849 | 252   | coding | noncoding | noncoding | noncoding |
| MSTRG. 9117. 1  |              | XLOC_004857 | 316   | coding | coding    | noncoding | noncoding |
| MSTRG. 9132. 1  | COL11A1      | XLOC_004863 | 430   | coding | noncoding | noncoding | noncoding |
| MSTRG. 9226. 1  | LOC101928436 | XLOC_004868 | 311   | coding | coding    | noncoding | noncoding |

|                  |           |             |      |        |           |           |           |
|------------------|-----------|-------------|------|--------|-----------|-----------|-----------|
| MSTRG. 9234. 3   | RNPC3     | XLOC_004874 | 308  | coding | noncoding | coding    | noncoding |
| MSTRG. 9177. 1   |           | XLOC_004883 | 200  | coding | noncoding | noncoding | noncoding |
| MSTRG. 9192. 1   |           | XLOC_004891 | 224  | coding | noncoding | noncoding | noncoding |
| MSTRG. 9204. 1   |           | XLOC_004897 | 249  | coding | noncoding | noncoding | noncoding |
| MSTRG. 9205. 1   |           | XLOC_004898 | 318  | coding | noncoding | noncoding | noncoding |
| MSTRG. 9215. 1   |           | XLOC_004903 | 312  | coding | noncoding | noncoding | noncoding |
| MSTRG. 9220. 1   |           | XLOC_004906 | 286  | coding | noncoding | noncoding | noncoding |
| MSTRG. 9260. 1   |           | XLOC_004915 | 289  | coding | noncoding | noncoding | noncoding |
| MSTRG. 9261. 1   |           | XLOC_004916 | 302  | coding | noncoding | noncoding | noncoding |
| MSTRG. 9264. 1   |           | XLOC_004919 | 281  | coding | noncoding | noncoding | noncoding |
| MSTRG. 9282. 1   |           | XLOC_004928 | 294  | coding | noncoding | noncoding | noncoding |
| MSTRG. 9283. 1   |           | XLOC_004929 | 270  | coding | noncoding | noncoding | noncoding |
| MSTRG. 9290. 1   |           | XLOC_004932 | 242  | coding | noncoding | noncoding | noncoding |
| MSTRG. 9294. 1   |           | XLOC_004935 | 233  | coding | noncoding | noncoding | noncoding |
| MSTRG. 9298. 1   |           | XLOC_004938 | 295  | coding | noncoding | noncoding | noncoding |
| MSTRG. 9319. 1   |           | XLOC_004948 | 257  | coding | noncoding | noncoding | noncoding |
| MSTRG. 9370. 1   |           | XLOC_004977 | 223  | coding | noncoding | noncoding | noncoding |
| NM_001349761. 2  | PRPF38B   | XLOC_004999 | 4894 | coding | coding    | coding    | coding    |
| MSTRG. 9622. 1   | C1orf194  | XLOC_005026 | 264  | coding | noncoding | noncoding | noncoding |
| MSTRG. 9625. 1   | KIAA1324  | XLOC_005029 | 230  | coding | noncoding | noncoding | noncoding |
| MSTRG. 9627. 1   | KIAA1324  | XLOC_005031 | 278  | coding | noncoding | noncoding | noncoding |
| MSTRG. 9616. 1   |           | XLOC_005034 | 217  | coding | noncoding | noncoding | noncoding |
| MSTRG. 9647. 1   | MYBPHL    | XLOC_005041 | 209  | coding | noncoding | noncoding | noncoding |
| MSTRG. 9782. 1   | GNAI3     | XLOC_005061 | 275  | coding | noncoding | noncoding | noncoding |
| MSTRG. 9796. 1   |           | XLOC_005080 | 261  | coding | noncoding | noncoding | noncoding |
| NM_001010898. 4  | SLC6A17   | XLOC_005090 | 6419 | coding | coding    | coding    | coding    |
| MSTRG. 9902. 4   | KCNA3     | XLOC_005125 | 6760 | coding | coding    | coding    | coding    |
| NM_001040033. 1  | CD53      | XLOC_005134 | 1572 | coding | coding    | coding    | coding    |
| MSTRG. 10016. 11 | DRAM2     | XLOC_005153 | 1224 | coding | coding    | noncoding | noncoding |
| XM_024450080. 1  | CEPT1     | XLOC_005153 | 2439 | coding | coding    | noncoding | coding    |
| MSTRG. 10035. 1  | TMIGD3    | XLOC_005183 | 272  | coding | noncoding | noncoding | noncoding |
| MSTRG. 10037. 1  | RAP1A     | XLOC_005185 | 277  | coding | noncoding | noncoding | noncoding |
| MSTRG. 10057. 1  | RAP1A     | XLOC_005200 | 245  | coding | noncoding | noncoding | noncoding |
| MSTRG. 9989. 1   |           | XLOC_005226 | 304  | coding | coding    | noncoding | noncoding |
| XM_017001806. 1  | CTTNBP2NL | XLOC_005234 | 5704 | coding | coding    | coding    | coding    |
| MSTRG. 10132. 1  | WNT2B     | XLOC_005237 | 271  | coding | noncoding | noncoding | noncoding |
| XM_017002424. 2  | CAPZA1    | XLOC_005242 | 2511 | coding | coding    | coding    | coding    |
| NM_001286072. 1  | MOV10     | XLOC_005245 | 4498 | coding | coding    | coding    | coding    |
| MSTRG. 10144. 18 | MOV10     | XLOC_005245 | 1039 | coding | coding    | coding    | noncoding |
| MSTRG. 10091. 1  |           | XLOC_005249 | 374  | coding | noncoding | noncoding | noncoding |
| MSTRG. 10097. 1  | LINC01356 | XLOC_005250 | 244  | coding | noncoding | noncoding | noncoding |
| MSTRG. 10108. 1  |           | XLOC_005261 | 289  | coding | coding    | noncoding | noncoding |
| MSTRG. 10114. 1  |           | XLOC_005264 | 230  | coding | noncoding | noncoding | noncoding |

|                  |              |             |      |        |           |           |           |
|------------------|--------------|-------------|------|--------|-----------|-----------|-----------|
| MSTRG. 10160. 1  | MAGI3        | XLOC_005280 | 463  | coding | coding    | noncoding | noncoding |
| MSTRG. 10170. 1  | MAGI3        | XLOC_005281 | 285  | coding | noncoding | noncoding | noncoding |
| XM_006710443. 4  | HIPK1        | XLOC_005289 | 7792 | coding | coding    | coding    | coding    |
| MSTRG. 10206. 10 | HIPK1        | XLOC_005289 | 2980 | coding | coding    | coding    | coding    |
| MSTRG. 10178. 1  |              | XLOC_005296 | 232  | coding | noncoding | noncoding | noncoding |
| MSTRG. 10184. 1  | SYT6         | XLOC_005297 | 298  | coding | noncoding | noncoding | noncoding |
| MSTRG. 10215. 1  |              | XLOC_005318 | 303  | coding | noncoding | noncoding | noncoding |
| MSTRG. 10254. 1  | AMPD1        | XLOC_005331 | 230  | coding | noncoding | noncoding | noncoding |
| MSTRG. 10312. 1  | SIKE1        | XLOC_005335 | 5425 | coding | coding    | coding    | noncoding |
| MSTRG. 10295. 1  |              | XLOC_005336 | 287  | coding | noncoding | noncoding | noncoding |
| MSTRG. 10323. 1  | SYCP1        | XLOC_005339 | 234  | coding | noncoding | noncoding | noncoding |
| MSTRG. 10327. 1  | SYCP1        | XLOC_005341 | 231  | coding | noncoding | noncoding | noncoding |
| MSTRG. 10378. 1  | VANGL1       | XLOC_005365 | 304  | coding | noncoding | noncoding | noncoding |
| MSTRG. 10371. 1  | CASQ2        | XLOC_005366 | 243  | coding | noncoding | noncoding | noncoding |
| MSTRG. 10429. 1  | SLC22A15     | XLOC_005381 | 241  | coding | noncoding | noncoding | noncoding |
| NM_001160233. 1  | ATP1A1       | XLOC_005407 | 3765 | coding | coding    | coding    | coding    |
| MSTRG. 10553. 1  | TTF2         | XLOC_005467 | 226  | coding | noncoding | noncoding | noncoding |
| MSTRG. 10576. 1  |              | XLOC_005490 | 249  | coding | coding    | noncoding | noncoding |
| MSTRG. 10600. 1  |              | XLOC_005516 | 276  | coding | noncoding | noncoding | noncoding |
| MSTRG. 10614. 1  |              | XLOC_005523 | 319  | coding | noncoding | noncoding | noncoding |
| MSTRG. 10620. 1  |              | XLOC_005526 | 296  | coding | noncoding | noncoding | noncoding |
| MSTRG. 10623. 1  |              | XLOC_005527 | 303  | coding | noncoding | noncoding | noncoding |
| XM_011541228. 2  | PHGDH        | XLOC_005575 | 7269 | coding | coding    | coding    | coding    |
| MSTRG. 10734. 1  | PHGDH        | XLOC_005577 | 260  | coding | noncoding | noncoding | noncoding |
| MSTRG. 10801. 2  | SEC22B       | XLOC_005591 | 5474 | coding | coding    | noncoding | noncoding |
| MSTRG. 11360. 1  |              | XLOC_005597 | 258  | coding | noncoding | noncoding | noncoding |
| MSTRG. 11412. 1  |              | XLOC_005635 | 240  | coding | noncoding | noncoding | noncoding |
| MSTRG. 11426. 1  | LINC00623    | XLOC_005646 | 222  | coding | noncoding | noncoding | noncoding |
| NR_160533. 1     | LOC105369199 | XLOC_005650 | 1313 | coding | noncoding | noncoding | noncoding |
| MSTRG. 11461. 1  | SRGAP2-AS1   | XLOC_005669 | 273  | coding | noncoding | noncoding | noncoding |
| XR_001737699. 1  | LOC101929805 | XLOC_005791 | 3657 | coding | noncoding | coding    | coding    |
| MSTRG. 11097. 16 | LINC01145    | XLOC_005796 | 1755 | coding | noncoding | noncoding | noncoding |
| MSTRG. 11097. 20 | LOC100996740 | XLOC_005796 | 5308 | coding | noncoding | coding    | noncoding |
| NR_104075. 1     | RNVU1-14     | XLOC_005798 | 164  | coding | noncoding | noncoding | noncoding |
| XM_011509910. 3  | GPR89A       | XLOC_005808 | 902  | coding | coding    | coding    | coding    |
| MSTRG. 11114. 1  | ANKRD35      | XLOC_005815 | 297  | coding | noncoding | noncoding | noncoding |
| MSTRG. 11122. 1  |              | XLOC_005826 | 241  | coding | noncoding | noncoding | noncoding |
| MSTRG. 11144. 1  |              | XLOC_005857 | 436  | coding | noncoding | noncoding | noncoding |
| NR_145686. 1     | CHD1L        | XLOC_005873 | 3124 | coding | coding    | coding    | coding    |
| MSTRG. 11238. 1  | LINC00624    | XLOC_005886 | 246  | coding | noncoding | noncoding | noncoding |
| MSTRG. 11268. 1  | LOC105371230 | XLOC_005904 | 244  | coding | coding    | noncoding | noncoding |
| MSTRG. 11263. 1  |              | XLOC_005908 | 230  | coding | noncoding | noncoding | noncoding |
| NM_001350182. 1  | GPR89B       | XLOC_005910 | 2252 | coding | coding    | coding    | coding    |

|                  |              |             |      |        |           |           |           |
|------------------|--------------|-------------|------|--------|-----------|-----------|-----------|
| MSTRG. 12143. 10 | LOC100132057 | XLOC_005931 | 3522 | coding | noncoding | noncoding | noncoding |
| MSTRG. 12143. 14 | LINC01138    | XLOC_005931 | 852  | coding | coding    | coding    | coding    |
| MSTRG. 12143. 17 | LOC105371224 | XLOC_005931 | 4600 | coding | noncoding | noncoding | noncoding |
| MSTRG. 11551. 1  | LOC105371433 | XLOC_006036 | 230  | coding | noncoding | noncoding | noncoding |
| MSTRG. 11530. 4  | ANP32E       | XLOC_006039 | 1658 | coding | noncoding | noncoding | noncoding |
| NR_073514. 1     | TARS2        | XLOC_006052 | 2664 | coding | coding    | coding    | coding    |
| MSTRG. 11574. 1  | ECM1         | XLOC_006056 | 294  | coding | noncoding | noncoding | noncoding |
| MSTRG. 11592. 17 | ADAMTSL4     | XLOC_006058 | 3318 | coding | coding    | coding    | coding    |
| MSTRG. 11635. 1  | SETDB1       | XLOC_006075 | 316  | coding | noncoding | noncoding | noncoding |
| MSTRG. 11636. 1  | SETDB1       | XLOC_006076 | 321  | coding | noncoding | noncoding | noncoding |
| MSTRG. 11639. 1  | SETDB1       | XLOC_006079 | 284  | coding | noncoding | noncoding | noncoding |
| NM_021222. 3     | PRUNE1       | XLOC_006084 | 3025 | coding | coding    | coding    | coding    |
| MSTRG. 11676. 1  | MLLT11       | XLOC_006092 | 263  | coding | noncoding | noncoding | noncoding |
| NM_001323912. 2  | GABPB2       | XLOC_006093 | 8644 | coding | coding    | coding    | coding    |
| MSTRG. 11646. 1  | GABPB2       | XLOC_006095 | 256  | coding | noncoding | noncoding | noncoding |
| MSTRG. 11647. 1  | GABPB2       | XLOC_006096 | 320  | coding | noncoding | noncoding | noncoding |
| MSTRG. 11677. 1  |              | XLOC_006105 | 239  | coding | noncoding | noncoding | noncoding |
| MSTRG. 11693. 1  |              | XLOC_006112 | 250  | coding | noncoding | noncoding | noncoding |
| MSTRG. 11703. 1  |              | XLOC_006115 | 233  | coding | noncoding | noncoding | noncoding |
| MSTRG. 11706. 1  | CGN          | XLOC_006118 | 275  | coding | noncoding | noncoding | noncoding |
| MSTRG. 11709. 1  |              | XLOC_006121 | 234  | coding | noncoding | noncoding | noncoding |
| MSTRG. 11795. 1  | LOC105371441 | XLOC_006161 | 259  | coding | noncoding | noncoding | noncoding |
| XR_002958366. 1  | LOC112268240 | XLOC_006174 | 1960 | coding | noncoding | coding    | noncoding |
| MSTRG. 11835. 1  | FLG          | XLOC_006178 | 418  | coding | coding    | noncoding | noncoding |
| MSTRG. 11843. 1  |              | XLOC_006181 | 222  | coding | coding    | noncoding | noncoding |
| MSTRG. 11845. 1  |              | XLOC_006183 | 287  | coding | noncoding | noncoding | noncoding |
| MSTRG. 11951. 1  | S100A13      | XLOC_006256 | 243  | coding | noncoding | noncoding | noncoding |
| NM_001324475. 2  | INTS3        | XLOC_006264 | 4911 | coding | coding    | coding    | coding    |
| MSTRG. 11982. 2  | SLC39A1      | XLOC_006270 | 1852 | coding | coding    | coding    | coding    |
| MSTRG. 12003. 1  | TPM3         | XLOC_006278 | 297  | coding | noncoding | noncoding | noncoding |
| MSTRG. 12041. 1  | IL6R         | XLOC_006297 | 276  | coding | noncoding | noncoding | noncoding |
| MSTRG. 12042. 1  | IL6R         | XLOC_006298 | 212  | coding | noncoding | noncoding | noncoding |
| MSTRG. 12043. 1  | SHE          | XLOC_006299 | 339  | coding | noncoding | noncoding | noncoding |
| MSTRG. 12045. 1  | SHE          | XLOC_006301 | 255  | coding | noncoding | noncoding | noncoding |
| MSTRG. 12051. 4  | CHRNA2       | XLOC_006304 | 6608 | coding | coding    | coding    | coding    |
| MSTRG. 12051. 3  | CHRNA2       | XLOC_006304 | 6607 | coding | coding    | coding    | coding    |
| MSTRG. 12051. 2  | CHRNA2       | XLOC_006304 | 6606 | coding | coding    | coding    | coding    |
| MSTRG. 12069. 1  | LOC105371449 | XLOC_006312 | 241  | coding | noncoding | noncoding | noncoding |
| MSTRG. 12091. 1  |              | XLOC_006335 | 256  | coding | noncoding | noncoding | noncoding |
| MSTRG. 12486. 14 | ASH1L-AS1    | XLOC_006352 | 6189 | coding | noncoding | coding    | coding    |
| NR_147963. 1     | ASH1L-AS1    | XLOC_006352 | 1209 | coding | noncoding | coding    | noncoding |
| MSTRG. 12486. 20 | GON4L        | XLOC_006352 | 4743 | coding | noncoding | coding    | coding    |
| XM_024448043. 1  | MSTO1        | XLOC_006358 | 2697 | coding | coding    | coding    | coding    |

|                |              |             |      |        |           |           |           |
|----------------|--------------|-------------|------|--------|-----------|-----------|-----------|
| MSTRG.12361.1  | LOC107985210 | XLOC_006372 | 220  | coding | noncoding | noncoding | noncoding |
| MSTRG.12365.1  | LMNA         | XLOC_006378 | 462  | coding | noncoding | noncoding | noncoding |
| NM_001370571.1 | SEMA4A       | XLOC_006379 | 3463 | coding | coding    | coding    | coding    |
| MSTRG.12426.1  |              | XLOC_006382 | 283  | coding | coding    | noncoding | noncoding |
| MSTRG.12378.1  |              | XLOC_006392 | 304  | coding | noncoding | noncoding | noncoding |
| MSTRG.12384.1  | C1orf61      | XLOC_006400 | 285  | coding | coding    | noncoding | noncoding |
| MSTRG.12404.1  | IQGAP3       | XLOC_006408 | 236  | coding | noncoding | noncoding | noncoding |
| MSTRG.12543.1  |              | XLOC_006458 | 325  | coding | noncoding | noncoding | noncoding |
| MSTRG.12556.1  |              | XLOC_006460 | 321  | coding | noncoding | noncoding | noncoding |
| MSTRG.12595.1  | KIRREL1      | XLOC_006480 | 304  | coding | noncoding | noncoding | noncoding |
| MSTRG.12604.1  |              | XLOC_006489 | 285  | coding | noncoding | noncoding | noncoding |
| MSTRG.12619.1  | CD1B         | XLOC_006496 | 255  | coding | noncoding | noncoding | noncoding |
| XM_011510134.3 | CD1E         | XLOC_006497 | 2551 | coding | coding    | coding    | coding    |
| MSTRG.12622.1  |              | XLOC_006499 | 232  | coding | noncoding | noncoding | noncoding |
| MSTRG.12628.1  |              | XLOC_006502 | 283  | coding | coding    | noncoding | noncoding |
| MSTRG.12698.1  | OR6N1        | XLOC_006531 | 284  | coding | noncoding | noncoding | noncoding |
| XM_017000463.1 | PYHIN1       | XLOC_006537 | 2554 | coding | coding    | coding    | coding    |
| XM_017001150.2 | IFI16        | XLOC_006548 | 3548 | coding | coding    | coding    | coding    |
| MSTRG.12737.1  |              | XLOC_006579 | 275  | coding | noncoding | noncoding | noncoding |
| MSTRG.12762.1  | SLAMF9       | XLOC_006621 | 257  | coding | noncoding | noncoding | noncoding |
| MSTRG.12826.1  | ATP1A4       | XLOC_006634 | 401  | coding | noncoding | noncoding | noncoding |
| MSTRG.12867.4  | SLAMF6       | XLOC_006646 | 2377 | coding | noncoding | noncoding | noncoding |
| MSTRG.12867.5  | SLAMF6       | XLOC_006646 | 2944 | coding | coding    | noncoding | noncoding |
| NM_001282593.1 | SLAMF7       | XLOC_006662 | 2352 | coding | noncoding | coding    | noncoding |
| NM_001282589.1 | SLAMF7       | XLOC_006662 | 2504 | coding | noncoding | coding    | coding    |
| NM_001282590.2 | SLAMF7       | XLOC_006662 | 2386 | coding | noncoding | coding    | coding    |
| MSTRG.12919.1  | LOC105371470 | XLOC_006670 | 315  | coding | coding    | noncoding | noncoding |
| MSTRG.12986.1  | ARHGAP30     | XLOC_006679 | 4373 | coding | coding    | coding    | coding    |
| XM_017001451.1 | UFC1         | XLOC_006686 | 1231 | coding | coding    | coding    | coding    |
| MSTRG.13000.1  |              | XLOC_006698 | 271  | coding | noncoding | noncoding | noncoding |
| MSTRG.13134.1  | NOS1AP       | XLOC_006795 | 318  | coding | noncoding | noncoding | noncoding |
| MSTRG.13136.1  | LOC105371475 | XLOC_006796 | 269  | coding | noncoding | noncoding | noncoding |
| NM_001135240.2 | C1orf226     | XLOC_006804 | 4156 | coding | coding    | coding    | coding    |
| MSTRG.13123.1  |              | XLOC_006807 | 241  | coding | noncoding | noncoding | noncoding |
| MSTRG.13231.1  | UAP1         | XLOC_006814 | 299  | coding | noncoding | noncoding | noncoding |
| MSTRG.13279.1  | HSD17B7      | XLOC_006826 | 256  | coding | noncoding | noncoding | noncoding |
| MSTRG.13287.1  |              | XLOC_006834 | 330  | coding | noncoding | noncoding | noncoding |
| MSTRG.13306.1  |              | XLOC_006883 | 358  | coding | noncoding | noncoding | noncoding |
| MSTRG.13314.1  |              | XLOC_006885 | 220  | coding | noncoding | coding    | noncoding |
| MSTRG.13310.1  |              | XLOC_006890 | 324  | coding | noncoding | noncoding | noncoding |
| MSTRG.13325.1  |              | XLOC_006893 | 239  | coding | noncoding | noncoding | noncoding |
| MSTRG.13329.1  |              | XLOC_006895 | 327  | coding | noncoding | noncoding | noncoding |
| MSTRG.13343.1  |              | XLOC_006900 | 205  | coding | noncoding | noncoding | noncoding |

|                  |            |             |       |        |           |           |           |
|------------------|------------|-------------|-------|--------|-----------|-----------|-----------|
| MSTRG. 13438. 1  | PBX1       | XLOC_006906 | 225   | coding | noncoding | noncoding | noncoding |
| MSTRG. 13443. 1  | LRRC52-AS1 | XLOC_006927 | 306   | coding | noncoding | noncoding | noncoding |
| MSTRG. 13544. 1  |            | XLOC_006976 | 267   | coding | noncoding | noncoding | noncoding |
| MSTRG. 13565. 1  |            | XLOC_006997 | 286   | coding | noncoding | noncoding | noncoding |
| MSTRG. 13577. 1  |            | XLOC_007000 | 301   | coding | noncoding | noncoding | noncoding |
| MSTRG. 13637. 1  | MPZL1      | XLOC_007046 | 257   | coding | noncoding | noncoding | noncoding |
| MSTRG. 13751. 1  | ADCY10     | XLOC_007058 | 321   | coding | noncoding | noncoding | noncoding |
| MSTRG. 13754. 1  | ADCY10     | XLOC_007060 | 258   | coding | noncoding | noncoding | noncoding |
| MSTRG. 13721. 1  |            | XLOC_007090 | 281   | coding | noncoding | noncoding | noncoding |
| MSTRG. 13800. 1  |            | XLOC_007110 | 319   | coding | noncoding | noncoding | noncoding |
| MSTRG. 13813. 1  |            | XLOC_007112 | 276   | coding | noncoding | noncoding | noncoding |
| MSTRG. 13791. 1  |            | XLOC_007115 | 511   | coding | noncoding | noncoding | noncoding |
| MSTRG. 13844. 1  |            | XLOC_007188 | 277   | coding | noncoding | noncoding | noncoding |
| MSTRG. 13930. 1  |            | XLOC_007190 | 304   | coding | noncoding | noncoding | noncoding |
| MSTRG. 13981. 1  | GORAB-AS1  | XLOC_007205 | 249   | coding | noncoding | noncoding | noncoding |
| MSTRG. 13982. 1  | GORAB-AS1  | XLOC_007206 | 266   | coding | noncoding | noncoding | noncoding |
| MSTRG. 13983. 1  | GORAB-AS1  | XLOC_007207 | 279   | coding | noncoding | noncoding | noncoding |
| MSTRG. 14054. 1  |            | XLOC_007254 | 230   | coding | noncoding | noncoding | noncoding |
| MSTRG. 14060. 1  |            | XLOC_007256 | 270   | coding | noncoding | noncoding | noncoding |
| MSTRG. 14115. 1  |            | XLOC_007297 | 744   | coding | noncoding | noncoding | noncoding |
| NM_001282751. 1  | SUCO       | XLOC_007298 | 5497  | coding | coding    | coding    | coding    |
| NM_004905. 3     | PRDX6      | XLOC_007421 | 1690  | coding | coding    | coding    | coding    |
| MSTRG. 14219. 1  | SLC9C2     | XLOC_007422 | 302   | coding | noncoding | noncoding | noncoding |
| MSTRG. 14265. 1  | KLHL20     | XLOC_007429 | 247   | coding | noncoding | noncoding | noncoding |
| MSTRG. 14236. 1  |            | XLOC_007451 | 576   | coding | noncoding | noncoding | noncoding |
| NM_001366456. 1  | RABGAP1L   | XLOC_007455 | 6817  | coding | noncoding | coding    | coding    |
| NM_001243765. 2  | RABGAP1L   | XLOC_007455 | 7015  | coding | noncoding | coding    | coding    |
| MSTRG. 14746. 1  | RABGAP1L   | XLOC_007523 | 318   | coding | noncoding | noncoding | noncoding |
| MSTRG. 14756. 1  | RABGAP1L   | XLOC_007533 | 288   | coding | noncoding | noncoding | noncoding |
| MSTRG. 14774. 1  | RABGAP1L   | XLOC_007551 | 223   | coding | noncoding | noncoding | noncoding |
| MSTRG. 14306. 1  |            | XLOC_007565 | 216   | coding | noncoding | noncoding | noncoding |
| MSTRG. 14869. 18 | COP1       | XLOC_007604 | 1791  | coding | coding    | noncoding | noncoding |
| MSTRG. 14935. 1  |            | XLOC_007609 | 453   | coding | noncoding | noncoding | noncoding |
| XM_017002024. 1  | PAPPA2     | XLOC_007612 | 9832  | coding | coding    | coding    | coding    |
| MSTRG. 14509. 1  | PAPPA2     | XLOC_007617 | 260   | coding | noncoding | noncoding | noncoding |
| MSTRG. 14546. 1  | ASTN1      | XLOC_007625 | 249   | coding | noncoding | noncoding | noncoding |
| MSTRG. 14549. 1  |            | XLOC_007643 | 270   | coding | noncoding | noncoding | noncoding |
| MSTRG. 14558. 1  |            | XLOC_007644 | 229   | coding | noncoding | noncoding | noncoding |
| MSTRG. 14562. 1  |            | XLOC_007659 | 243   | coding | noncoding | noncoding | noncoding |
| XM_017002849. 1  | RASAL2     | XLOC_007660 | 12905 | coding | coding    | coding    | coding    |
| MSTRG. 14586. 1  | RASAL2     | XLOC_007662 | 314   | coding | noncoding | noncoding | noncoding |
| MSTRG. 14807. 1  | RALGPS2    | XLOC_007694 | 227   | coding | noncoding | coding    | noncoding |
| MSTRG. 14824. 1  | RALGPS2    | XLOC_007710 | 290   | coding | noncoding | noncoding | noncoding |

|                |              |             |       |        |           |           |           |
|----------------|--------------|-------------|-------|--------|-----------|-----------|-----------|
| XM_017003001.2 | FAM20B       | XLOC_007715 | 5900  | coding | coding    | coding    | coding    |
| NM_003101.6    | SOAT1        | XLOC_007724 | 6840  | coding | coding    | coding    | coding    |
| MSTRG.14839.1  | AXDND1       | XLOC_007729 | 270   | coding | noncoding | noncoding | noncoding |
| MSTRG.14841.1  | AXDND1       | XLOC_007730 | 268   | coding | noncoding | noncoding | noncoding |
| NM_001199085.3 | TDRD5        | XLOC_007733 | 3745  | coding | coding    | coding    | coding    |
| MSTRG.14860.1  | FAM163A      | XLOC_007738 | 320   | coding | noncoding | noncoding | noncoding |
| MSTRG.14956.3  | TOR1AIP2     | XLOC_007740 | 2822  | coding | coding    | noncoding | coding    |
| MSTRG.14975.1  | CEP350       | XLOC_007750 | 250   | coding | noncoding | noncoding | noncoding |
| XM_017002755.1 | LHX4         | XLOC_007770 | 6160  | coding | coding    | coding    | coding    |
| MSTRG.15003.1  | XPR1         | XLOC_007788 | 311   | coding | noncoding | noncoding | noncoding |
| MSTRG.15043.1  |              | XLOC_007804 | 290   | coding | noncoding | noncoding | noncoding |
| MSTRG.15044.1  |              | XLOC_007805 | 260   | coding | noncoding | noncoding | noncoding |
| MSTRG.15083.1  | MR1          | XLOC_007807 | 281   | coding | noncoding | noncoding | noncoding |
| MSTRG.15079.1  |              | XLOC_007821 | 412   | coding | coding    | noncoding | noncoding |
| XM_017002244.1 | CACNA1E      | XLOC_007823 | 17053 | coding | coding    | coding    | coding    |
| MSTRG.15100.1  |              | XLOC_007838 | 279   | coding | noncoding | noncoding | noncoding |
| MSTRG.15103.1  |              | XLOC_007839 | 278   | coding | noncoding | noncoding | noncoding |
| MSTRG.15108.1  |              | XLOC_007842 | 869   | coding | coding    | noncoding | noncoding |
| MSTRG.15121.1  |              | XLOC_007850 | 694   | coding | noncoding | noncoding | noncoding |
| MSTRG.15126.1  |              | XLOC_007853 | 256   | coding | noncoding | noncoding | noncoding |
| MSTRG.15137.1  | LINC01344    | XLOC_007856 | 276   | coding | noncoding | noncoding | noncoding |
| MSTRG.15138.1  | LINC01344    | XLOC_007857 | 301   | coding | noncoding | noncoding | noncoding |
| MSTRG.15242.1  |              | XLOC_007911 | 252   | coding | noncoding | noncoding | noncoding |
| MSTRG.15247.1  | SHCBP1L      | XLOC_007913 | 349   | coding | noncoding | noncoding | noncoding |
| MSTRG.15280.1  | NMNAT2       | XLOC_007925 | 234   | coding | noncoding | noncoding | noncoding |
| XM_011510208.3 | SMG7         | XLOC_007929 | 5753  | coding | coding    | coding    | coding    |
| MSTRG.15373.1  | RGL1         | XLOC_007949 | 267   | coding | noncoding | noncoding | noncoding |
| MSTRG.15416.1  | LINC01633    | XLOC_007999 | 615   | coding | coding    | coding    | noncoding |
| MSTRG.15426.1  | RNF2         | XLOC_008004 | 304   | coding | noncoding | noncoding | noncoding |
| MSTRG.15584.20 | SWT1         | XLOC_008011 | 589   | coding | noncoding | coding    | noncoding |
| NM_031935.3    | HMCN1        | XLOC_008030 | 18368 | coding | coding    | noncoding | coding    |
| MSTRG.15674.1  | PDC          | XLOC_008047 | 300   | coding | noncoding | noncoding | noncoding |
| MSTRG.15656.1  |              | XLOC_008065 | 254   | coding | noncoding | noncoding | noncoding |
| MSTRG.15709.1  |              | XLOC_008091 | 306   | coding | noncoding | noncoding | noncoding |
| MSTRG.15721.1  |              | XLOC_008097 | 326   | coding | noncoding | noncoding | noncoding |
| MSTRG.15724.1  |              | XLOC_008098 | 245   | coding | noncoding | noncoding | noncoding |
| MSTRG.15747.1  | LOC105371657 | XLOC_008107 | 338   | coding | coding    | noncoding | noncoding |
| MSTRG.15749.1  | LOC105371657 | XLOC_008109 | 266   | coding | noncoding | noncoding | noncoding |
| MSTRG.15751.1  | LOC105371657 | XLOC_008110 | 250   | coding | noncoding | noncoding | noncoding |
| MSTRG.15744.1  |              | XLOC_008116 | 269   | coding | noncoding | noncoding | noncoding |
| MSTRG.15844.1  |              | XLOC_008143 | 292   | coding | noncoding | noncoding | noncoding |
| MSTRG.15889.1  |              | XLOC_008164 | 266   | coding | noncoding | noncoding | noncoding |
| MSTRG.15978.3  | CDC73        | XLOC_008279 | 368   | coding | coding    | noncoding | noncoding |

|                 |              |             |      |        |           |           |           |
|-----------------|--------------|-------------|------|--------|-----------|-----------|-----------|
| MSTRG. 16121. 1 |              | XLOC_008371 | 357  | coding | noncoding | noncoding | noncoding |
| MSTRG. 16129. 1 |              | XLOC_008373 | 243  | coding | noncoding | noncoding | noncoding |
| MSTRG. 16164. 1 | LOC105371671 | XLOC_008386 | 290  | coding | noncoding | noncoding | noncoding |
| MSTRG. 16169. 1 | LOC105371671 | XLOC_008389 | 238  | coding | noncoding | noncoding | noncoding |
| MSTRG. 16151. 1 |              | XLOC_008396 | 291  | coding | noncoding | noncoding | noncoding |
| MSTRG. 16159. 1 |              | XLOC_008403 | 287  | coding | noncoding | noncoding | noncoding |
| MSTRG. 16176. 1 |              | XLOC_008404 | 359  | coding | noncoding | noncoding | noncoding |
| MSTRG. 16209. 1 | KCNT2        | XLOC_008419 | 248  | coding | noncoding | noncoding | noncoding |
| XM_017000344. 1 | NEK7         | XLOC_008463 | 4136 | coding | coding    | coding    | coding    |
| NM_002838. 5    | PTPRC        | XLOC_008513 | 5357 | coding | coding    | coding    | coding    |
| MSTRG. 16351. 1 | LINC02789    | XLOC_008545 | 306  | coding | noncoding | noncoding | noncoding |
| MSTRG. 16338. 1 |              | XLOC_008549 | 312  | coding | coding    | noncoding | noncoding |
| MSTRG. 16354. 1 |              | XLOC_008552 | 296  | coding | noncoding | noncoding | noncoding |
| MSTRG. 16387. 1 | NR5A2        | XLOC_008556 | 240  | coding | noncoding | noncoding | noncoding |
| MSTRG. 16400. 1 |              | XLOC_008581 | 354  | coding | noncoding | noncoding | noncoding |
| MSTRG. 16404. 1 |              | XLOC_008584 | 549  | coding | noncoding | noncoding | noncoding |
| MSTRG. 16509. 3 | KIF14        | XLOC_008587 | 1514 | coding | coding    | noncoding | noncoding |
| MSTRG. 16573. 1 |              | XLOC_008622 | 299  | coding | noncoding | noncoding | noncoding |
| MSTRG. 16670. 1 | IPO9         | XLOC_008642 | 604  | coding | noncoding | noncoding | noncoding |
| MSTRG. 16604. 1 | TIMM17A      | XLOC_008653 | 300  | coding | noncoding | noncoding | noncoding |
| MSTRG. 16626. 2 | PTPN7        | XLOC_008660 | 1184 | coding | coding    | noncoding | coding    |
| MSTRG. 16625. 1 | PTPRVP       | XLOC_008662 | 273  | coding | noncoding | noncoding | noncoding |
| XM_011509842. 2 | LGR6         | XLOC_008663 | 4807 | coding | coding    | coding    | coding    |
| MSTRG. 16870. 1 |              | XLOC_008710 | 288  | coding | noncoding | noncoding | noncoding |
| MSTRG. 16883. 3 | RABIF        | XLOC_008713 | 1617 | coding | coding    | coding    | noncoding |
| MSTRG. 16940. 1 |              | XLOC_008743 | 292  | coding | noncoding | noncoding | noncoding |
| NM_001365784. 1 | ATP2B4       | XLOC_008756 | 4326 | coding | coding    | coding    | coding    |
| XM_017002958. 1 | ZC3H11A      | XLOC_008768 | 6026 | coding | coding    | coding    | coding    |
| MSTRG. 17023. 1 |              | XLOC_008775 | 301  | coding | noncoding | noncoding | noncoding |
| MSTRG. 17032. 1 |              | XLOC_008778 | 244  | coding | noncoding | noncoding | noncoding |
| MSTRG. 17038. 1 | LINC00303    | XLOC_008781 | 252  | coding | noncoding | noncoding | noncoding |
| MSTRG. 17035. 1 |              | XLOC_008782 | 213  | coding | noncoding | noncoding | noncoding |
| MSTRG. 17081. 1 | PLEKHA6      | XLOC_008795 | 260  | coding | noncoding | noncoding | noncoding |
| MSTRG. 17085. 1 | PLEKHA6      | XLOC_008798 | 262  | coding | noncoding | noncoding | noncoding |
| MSTRG. 17177. 1 |              | XLOC_008843 | 306  | coding | noncoding | noncoding | noncoding |
| MSTRG. 17186. 1 |              | XLOC_008850 | 354  | coding | noncoding | noncoding | noncoding |
| MSTRG. 17208. 1 | LEMD1        | XLOC_008855 | 242  | coding | coding    | noncoding | noncoding |
| MSTRG. 17230. 1 | SLC45A3      | XLOC_008872 | 282  | coding | noncoding | noncoding | noncoding |
| MSTRG. 17272. 1 | LOC284581    | XLOC_008894 | 225  | coding | noncoding | noncoding | noncoding |
| MSTRG. 17291. 3 | CTSE         | XLOC_008899 | 1642 | coding | coding    | noncoding | coding    |
| MSTRG. 17403. 1 | SRGAP2       | XLOC_008920 | 259  | coding | noncoding | noncoding | noncoding |
| NM_001004023. 2 | DYRK3        | XLOC_008939 | 8239 | coding | coding    | coding    | coding    |
| MSTRG. 17350. 1 | IL19         | XLOC_008952 | 266  | coding | noncoding | noncoding | noncoding |

|                |              |             |       |        |           |           |           |
|----------------|--------------|-------------|-------|--------|-----------|-----------|-----------|
| MSTRG.17375.1  | FCAMR        | XLOC_008961 | 227   | coding | noncoding | noncoding | noncoding |
| NM_006212.2    | PFKFB2       | XLOC_008963 | 7073  | coding | coding    | coding    | coding    |
| MSTRG.17413.1  |              | XLOC_008973 | 265   | coding | noncoding | noncoding | noncoding |
| MSTRG.17845.1  | CR1L         | XLOC_009048 | 226   | coding | noncoding | noncoding | noncoding |
| MSTRG.17846.1  | CR1L         | XLOC_009049 | 249   | coding | noncoding | noncoding | noncoding |
| NM_153826.4    | CD46         | XLOC_009057 | 3227  | coding | coding    | coding    | coding    |
| MSTRG.17861.8  | MIR29B2CHG   | XLOC_009063 | 4704  | coding | noncoding | coding    | noncoding |
| MSTRG.17534.1  | PLXNA2       | XLOC_009074 | 380   | coding | coding    | noncoding | noncoding |
| MSTRG.17507.1  |              | XLOC_009115 | 395   | coding | noncoding | noncoding | noncoding |
| MSTRG.17600.1  | LOC105372892 | XLOC_009135 | 260   | coding | noncoding | noncoding | noncoding |
| MSTRG.17618.1  | LOC107985255 | XLOC_009142 | 257   | coding | noncoding | noncoding | noncoding |
| NM_001146264.3 | SYT14        | XLOC_009199 | 12184 | coding | coding    | coding    | coding    |
| XM_017001740.1 | HHAT         | XLOC_009206 | 2048  | coding | coding    | coding    | coding    |
| MSTRG.17738.1  | KCNH1        | XLOC_009215 | 258   | coding | noncoding | noncoding | noncoding |
| MSTRG.17741.1  | KCNH1        | XLOC_009216 | 221   | coding | noncoding | noncoding | noncoding |
| MSTRG.17743.1  | KCNH1        | XLOC_009218 | 315   | coding | noncoding | noncoding | noncoding |
| MSTRG.17744.1  | KCNH1        | XLOC_009219 | 235   | coding | noncoding | noncoding | noncoding |
| MSTRG.17745.1  | KCNH1        | XLOC_009220 | 266   | coding | noncoding | noncoding | noncoding |
| XM_017001765.2 | RCOR3        | XLOC_009228 | 3871  | coding | coding    | coding    | coding    |
| MSTRG.17753.1  |              | XLOC_009251 | 240   | coding | noncoding | noncoding | noncoding |
| MSTRG.17765.1  | LINC01693    | XLOC_009261 | 204   | coding | noncoding | noncoding | noncoding |
| MSTRG.17773.1  |              | XLOC_009264 | 286   | coding | noncoding | noncoding | noncoding |
| MSTRG.17895.1  |              | XLOC_009279 | 294   | coding | noncoding | noncoding | noncoding |
| MSTRG.17912.1  |              | XLOC_009303 | 225   | coding | noncoding | noncoding | noncoding |
| XM_024453283.1 | TATDN3       | XLOC_009328 | 2285  | coding | coding    | coding    | coding    |
| MSTRG.18099.1  | RPS6KC1      | XLOC_009351 | 255   | coding | noncoding | noncoding | noncoding |
| MSTRG.18113.1  | RPS6KC1      | XLOC_009360 | 320   | coding | noncoding | noncoding | noncoding |
| MSTRG.18060.1  | LOC105372912 | XLOC_009365 | 294   | coding | noncoding | noncoding | noncoding |
| XM_011509772.2 | PROX1        | XLOC_009376 | 8147  | coding | coding    | coding    | coding    |
| MSTRG.18048.1  |              | XLOC_009381 | 366   | coding | noncoding | noncoding | noncoding |
| MSTRG.18143.1  | SMYD2        | XLOC_009386 | 643   | coding | noncoding | noncoding | noncoding |
| MSTRG.18155.1  | PTPN14       | XLOC_009393 | 302   | coding | noncoding | noncoding | noncoding |
| MSTRG.18129.1  |              | XLOC_009403 | 281   | coding | noncoding | noncoding | noncoding |
| MSTRG.18135.1  |              | XLOC_009410 | 222   | coding | noncoding | noncoding | noncoding |
| MSTRG.18193.1  | USH2A        | XLOC_009424 | 293   | coding | noncoding | noncoding | noncoding |
| MSTRG.18198.1  | USH2A        | XLOC_009427 | 275   | coding | noncoding | noncoding | noncoding |
| MSTRG.18205.1  | USH2A        | XLOC_009433 | 288   | coding | noncoding | noncoding | noncoding |
| MSTRG.18230.1  | ESRRG        | XLOC_009441 | 296   | coding | noncoding | noncoding | noncoding |
| MSTRG.18214.1  |              | XLOC_009452 | 238   | coding | noncoding | noncoding | noncoding |
| NM_001135599.3 | TGFB2        | XLOC_009473 | 6004  | coding | coding    | coding    | coding    |
| MSTRG.18293.1  |              | XLOC_009483 | 248   | coding | noncoding | noncoding | noncoding |
| MSTRG.18299.1  |              | XLOC_009487 | 251   | coding | noncoding | noncoding | noncoding |
| MSTRG.18447.1  |              | XLOC_009490 | 315   | coding | noncoding | noncoding | noncoding |

|                 |              |             |       |        |           |           |           |
|-----------------|--------------|-------------|-------|--------|-----------|-----------|-----------|
| MSTRG. 18451. 1 |              | XLOC_009492 | 270   | coding | noncoding | noncoding | noncoding |
| MSTRG. 18328. 1 |              | XLOC_009535 | 318   | coding | noncoding | noncoding | noncoding |
| MSTRG. 18374. 1 |              | XLOC_009557 | 215   | coding | noncoding | noncoding | noncoding |
| MSTRG. 18376. 1 |              | XLOC_009558 | 261   | coding | noncoding | noncoding | noncoding |
| NM_001286129. 2 | MARK1        | XLOC_009559 | 2776  | coding | noncoding | coding    | noncoding |
| MSTRG. 18399. 1 |              | XLOC_009581 | 211   | coding | noncoding | noncoding | noncoding |
| MSTRG. 18416. 1 |              | XLOC_009588 | 251   | coding | noncoding | noncoding | noncoding |
| MSTRG. 18431. 1 |              | XLOC_009596 | 235   | coding | noncoding | noncoding | noncoding |
| MSTRG. 18442. 1 |              | XLOC_009598 | 275   | coding | noncoding | coding    | noncoding |
| MSTRG. 18444. 1 |              | XLOC_009599 | 298   | coding | noncoding | noncoding | noncoding |
| MSTRG. 18604. 1 |              | XLOC_009634 | 224   | coding | noncoding | noncoding | noncoding |
| MSTRG. 18610. 1 | LOC105372956 | XLOC_009638 | 623   | coding | coding    | noncoding | noncoding |
| MSTRG. 18619. 1 | HHIPL2       | XLOC_009642 | 214   | coding | noncoding | noncoding | noncoding |
| MSTRG. 18703. 1 | DISP1        | XLOC_009667 | 296   | coding | noncoding | noncoding | noncoding |
| MSTRG. 18651. 1 |              | XLOC_009681 | 247   | coding | noncoding | noncoding | noncoding |
| MSTRG. 18762. 1 |              | XLOC_009723 | 279   | coding | noncoding | noncoding | noncoding |
| MSTRG. 18733. 1 | LOC105373061 | XLOC_009745 | 610   | coding | noncoding | noncoding | noncoding |
| MSTRG. 18731. 1 |              | XLOC_009746 | 278   | coding | noncoding | noncoding | noncoding |
| XM_017002648. 2 | DEGS1        | XLOC_009754 | 1826  | coding | coding    | noncoding | coding    |
| MSTRG. 18806. 1 | DEGS1        | XLOC_009755 | 367   | coding | noncoding | noncoding | noncoding |
| MSTRG. 18760. 1 |              | XLOC_009757 | 260   | coding | noncoding | noncoding | noncoding |
| MSTRG. 18761. 1 |              | XLOC_009758 | 222   | coding | noncoding | noncoding | noncoding |
| MSTRG. 18808. 1 |              | XLOC_009760 | 281   | coding | noncoding | noncoding | noncoding |
| NM_001277199. 2 | CNIH4        | XLOC_009764 | 4374  | coding | coding    | noncoding | noncoding |
| MSTRG. 18825. 1 |              | XLOC_009775 | 285   | coding | noncoding | noncoding | noncoding |
| MSTRG. 18826. 1 |              | XLOC_009776 | 309   | coding | coding    | noncoding | noncoding |
| XM_011544071. 2 | DNAH14       | XLOC_009778 | 14796 | coding | coding    | coding    | coding    |
| MSTRG. 18901. 1 | DNAH14       | XLOC_009779 | 285   | coding | coding    | noncoding | noncoding |
| MSTRG. 18859. 1 |              | XLOC_009791 | 254   | coding | noncoding | noncoding | noncoding |
| MSTRG. 18861. 1 |              | XLOC_009796 | 234   | coding | noncoding | noncoding | noncoding |
| MSTRG. 18958. 1 | EPHX1        | XLOC_009804 | 7969  | coding | coding    | coding    | coding    |
| MSTRG. 18888. 2 | PYCR2        | XLOC_009810 | 879   | coding | coding    | noncoding | noncoding |
| MSTRG. 18891. 1 |              | XLOC_009813 | 269   | coding | noncoding | noncoding | noncoding |
| MSTRG. 18927. 1 | LINC01703    | XLOC_009818 | 452   | coding | noncoding | noncoding | noncoding |
| MSTRG. 18963. 1 |              | XLOC_009820 | 520   | coding | noncoding | noncoding | noncoding |
| MSTRG. 18950. 1 |              | XLOC_009823 | 262   | coding | noncoding | noncoding | noncoding |
| MSTRG. 18987. 1 |              | XLOC_009843 | 232   | coding | noncoding | noncoding | noncoding |
| MSTRG. 19044. 5 | CDC42BPA     | XLOC_009854 | 653   | coding | coding    | noncoding | noncoding |
| MSTRG. 19000. 1 |              | XLOC_009857 | 207   | coding | noncoding | noncoding | noncoding |
| NM_178549. 4    | ZNF678       | XLOC_009861 | 8515  | coding | coding    | noncoding | coding    |
| MSTRG. 19077. 1 | ZNF678       | XLOC_009865 | 204   | coding | noncoding | noncoding | noncoding |
| NM_183062. 2    | PRSS38       | XLOC_009870 | 1243  | coding | coding    | coding    | coding    |
| MSTRG. 19083. 1 | WNT3A        | XLOC_009879 | 308   | coding | noncoding | noncoding | noncoding |

|                |              |             |       |        |           |           |           |
|----------------|--------------|-------------|-------|--------|-----------|-----------|-----------|
| MSTRG.19186.1  |              | XLOC_009918 | 656   | coding | noncoding | noncoding | noncoding |
| MSTRG.19206.1  | ACTA1        | XLOC_009964 | 387   | coding | coding    | noncoding | noncoding |
| MSTRG.19219.6  | ABCB10       | XLOC_009969 | 2391  | coding | coding    | noncoding | noncoding |
| MSTRG.19219.12 | ABCB10       | XLOC_009969 | 1887  | coding | coding    | noncoding | noncoding |
| MSTRG.19219.11 | ABCB10       | XLOC_009969 | 2199  | coding | coding    | coding    | noncoding |
| MSTRG.19209.1  |              | XLOC_009970 | 272   | coding | noncoding | noncoding | noncoding |
| XM_017000964.2 | GALNT2       | XLOC_009987 | 2778  | coding | coding    | coding    | coding    |
| MSTRG.19351.1  | COG2         | XLOC_010028 | 284   | coding | noncoding | noncoding | noncoding |
| MSTRG.19388.7  | TTC13        | XLOC_010042 | 2047  | coding | coding    | coding    | noncoding |
| MSTRG.19437.1  |              | XLOC_010072 | 253   | coding | noncoding | noncoding | noncoding |
| NM_001164554.2 | DISC1        | XLOC_010078 | 1832  | coding | noncoding | coding    | coding    |
| MSTRG.19754.1  | LOC105373170 | XLOC_010103 | 421   | coding | noncoding | noncoding | noncoding |
| MSTRG.19775.1  | TSNAX-DISC1  | XLOC_010123 | 209   | coding | noncoding | noncoding | noncoding |
| MSTRG.19487.1  |              | XLOC_010139 | 309   | coding | noncoding | noncoding | noncoding |
| MSTRG.19498.1  |              | XLOC_010150 | 343   | coding | noncoding | noncoding | noncoding |
| MSTRG.19507.1  | LINC01744    | XLOC_010155 | 259   | coding | noncoding | noncoding | noncoding |
| MSTRG.19546.1  |              | XLOC_010197 | 283   | coding | noncoding | noncoding | noncoding |
| MSTRG.19549.1  |              | XLOC_010198 | 283   | coding | noncoding | noncoding | noncoding |
| MSTRG.19563.1  |              | XLOC_010206 | 301   | coding | coding    | noncoding | noncoding |
| MSTRG.19564.1  |              | XLOC_010207 | 270   | coding | noncoding | noncoding | noncoding |
| MSTRG.19584.1  | SLC35F3      | XLOC_010211 | 357   | coding | coding    | noncoding | noncoding |
| MSTRG.19585.1  | SLC35F3      | XLOC_010212 | 405   | coding | noncoding | noncoding | noncoding |
| MSTRG.19661.1  |              | XLOC_010261 | 331   | coding | noncoding | noncoding | noncoding |
| MSTRG.19663.1  |              | XLOC_010263 | 617   | coding | noncoding | noncoding | noncoding |
| MSTRG.19693.1  | GNG4         | XLOC_010275 | 229   | coding | noncoding | noncoding | noncoding |
| MSTRG.19867.1  |              | XLOC_010289 | 285   | coding | noncoding | noncoding | noncoding |
| MSTRG.19883.1  |              | XLOC_010298 | 215   | coding | noncoding | noncoding | noncoding |
| MSTRG.19884.1  |              | XLOC_010299 | 316   | coding | noncoding | noncoding | noncoding |
| MSTRG.19936.1  | EDARADD      | XLOC_010301 | 247   | coding | noncoding | noncoding | noncoding |
| MSTRG.19941.1  |              | XLOC_010303 | 291   | coding | noncoding | noncoding | noncoding |
| MSTRG.19964.1  |              | XLOC_010308 | 201   | coding | noncoding | noncoding | noncoding |
| MSTRG.19968.1  | ACTN2        | XLOC_010311 | 364   | coding | noncoding | noncoding | noncoding |
| MSTRG.19976.1  | LOC107985368 | XLOC_010332 | 268   | coding | noncoding | noncoding | noncoding |
| MSTRG.20007.1  | LOC105373220 | XLOC_010362 | 230   | coding | noncoding | noncoding | noncoding |
| MSTRG.20035.1  |              | XLOC_010382 | 234   | coding | noncoding | noncoding | noncoding |
| XM_017000152.2 | CHRM3        | XLOC_010388 | 12109 | coding | coding    | coding    | coding    |
| MSTRG.20137.1  | LOC105373225 | XLOC_010395 | 200   | coding | noncoding | noncoding | noncoding |
| MSTRG.20113.1  | FMN2         | XLOC_010406 | 361   | coding | noncoding | noncoding | noncoding |
| MSTRG.20115.1  | FMN2         | XLOC_010407 | 303   | coding | noncoding | noncoding | noncoding |
| MSTRG.20121.1  | FMN2         | XLOC_010412 | 285   | coding | noncoding | noncoding | noncoding |
| MSTRG.20122.1  | FMN2         | XLOC_010413 | 293   | coding | noncoding | noncoding | noncoding |
| MSTRG.20175.1  | LOC105373230 | XLOC_010448 | 276   | coding | noncoding | noncoding | noncoding |
| MSTRG.20282.1  | WDR64        | XLOC_010455 | 230   | coding | noncoding | noncoding | noncoding |

|                 |               |             |      |        |           |           |           |
|-----------------|---------------|-------------|------|--------|-----------|-----------|-----------|
| MSTRG. 20284. 1 | WDR64         | XLOC_010457 | 271  | coding | noncoding | noncoding | noncoding |
| MSTRG. 20216. 1 |               | XLOC_010461 | 300  | coding | noncoding | coding    | noncoding |
| MSTRG. 20218. 1 |               | XLOC_010463 | 318  | coding | noncoding | noncoding | noncoding |
| MSTRG. 20248. 1 | PLD5          | XLOC_010466 | 277  | coding | coding    | noncoding | noncoding |
| MSTRG. 20233. 1 |               | XLOC_010479 | 287  | coding | noncoding | noncoding | noncoding |
| MSTRG. 20239. 1 |               | XLOC_010481 | 277  | coding | noncoding | noncoding | noncoding |
| MSTRG. 20291. 1 |               | XLOC_010493 | 238  | coding | noncoding | noncoding | noncoding |
| MSTRG. 20408. 1 | C1orf100      | XLOC_010527 | 250  | coding | noncoding | noncoding | noncoding |
| MSTRG. 20414. 5 | ADSS          | XLOC_010532 | 2298 | coding | coding    | coding    | noncoding |
| MSTRG. 20434. 1 | CATSPERE      | XLOC_010535 | 220  | coding | noncoding | noncoding | noncoding |
| XM_011544205. 3 | DESI2         | XLOC_010539 | 4747 | coding | coding    | coding    | coding    |
| MSTRG. 20350. 1 | DESI2         | XLOC_010541 | 267  | coding | noncoding | noncoding | noncoding |
| MSTRG. 20345. 1 |               | XLOC_010542 | 276  | coding | noncoding | noncoding | noncoding |
| MSTRG. 20464. 1 |               | XLOC_010548 | 248  | coding | noncoding | noncoding | noncoding |
| XM_011544300. 2 | EFCAB2        | XLOC_010554 | 3792 | coding | noncoding | coding    | coding    |
| MSTRG. 20489. 1 | EFCAB2        | XLOC_010558 | 305  | coding | noncoding | noncoding | noncoding |
| MSTRG. 20467. 1 | KIF26B        | XLOC_010562 | 281  | coding | noncoding | noncoding | noncoding |
| MSTRG. 20469. 1 | KIF26B-AS1    | XLOC_010563 | 297  | coding | noncoding | noncoding | noncoding |
| MSTRG. 20512. 1 |               | XLOC_010581 | 221  | coding | noncoding | noncoding | noncoding |
| XM_005273083. 5 | CNST          | XLOC_010583 | 4936 | coding | coding    | coding    | coding    |
| MSTRG. 20540. 1 | ZNF670-ZNF695 | XLOC_010594 | 243  | coding | coding    | noncoding | noncoding |
| MSTRG. 20549. 1 | ZNF670        | XLOC_010602 | 288  | coding | noncoding | noncoding | noncoding |
| MSTRG. 20579. 1 | LOC112268259  | XLOC_010623 | 1676 | coding | coding    | noncoding | noncoding |
| MSTRG. 20579. 2 | LOC112268259  | XLOC_010623 | 1643 | coding | coding    | noncoding | noncoding |
| MSTRG. 20620. 1 | LOC107985115  | XLOC_010629 | 277  | coding | noncoding | noncoding | noncoding |
| MSTRG. 20660. 3 | TRIM58        | XLOC_010646 | 2764 | coding | noncoding | noncoding | noncoding |
| NM_001004686. 2 | OR2L2         | XLOC_010656 | 1134 | coding | coding    | coding    | coding    |
| MSTRG. 20784. 1 |               | XLOC_010717 | 398  | coding | noncoding | noncoding | noncoding |
| NR_024540. 1    | WASH7P        | XLOC_010720 | 1769 | coding | coding    | coding    | coding    |
| NR_039983. 2    | LOC729737     | XLOC_010724 | 5474 | coding | coding    | coding    | coding    |
| MSTRG. 180. 1   | LOC105378947  | XLOC_010738 | 264  | coding | noncoding | noncoding | noncoding |
| NR_027055. 1    | FAM41C        | XLOC_010770 | 1706 | coding | noncoding | noncoding | noncoding |
| MSTRG. 88. 10   | ACAP3         | XLOC_010802 | 310  | coding | noncoding | noncoding | noncoding |
| XR_002957684. 1 | CCNL2         | XLOC_010813 | 4399 | coding | coding    | coding    | coding    |
| MSTRG. 114. 1   | ATAD3B        | XLOC_010821 | 366  | coding | noncoding | noncoding | noncoding |
| MSTRG. 118. 1   | ATAD3B        | XLOC_010825 | 255  | coding | noncoding | noncoding | noncoding |
| MSTRG. 105. 1   |               | XLOC_010832 | 314  | coding | noncoding | noncoding | noncoding |
| MSTRG. 310. 1   | MIB2          | XLOC_010840 | 259  | coding | noncoding | coding    | noncoding |
| XM_017002145. 2 | NADK          | XLOC_010848 | 3477 | coding | coding    | coding    | coding    |
| MSTRG. 336. 1   | GNB1          | XLOC_010859 | 281  | coding | noncoding | noncoding | noncoding |
| MSTRG. 338. 1   | GNB1          | XLOC_010861 | 384  | coding | noncoding | noncoding | noncoding |
| MSTRG. 130. 1   |               | XLOC_010864 | 254  | coding | noncoding | noncoding | noncoding |
| MSTRG. 139. 1   | CFAP74        | XLOC_010867 | 228  | coding | noncoding | noncoding | noncoding |

|                 |              |             |       |        |           |           |           |
|-----------------|--------------|-------------|-------|--------|-----------|-----------|-----------|
| MSTRG. 227. 3   | PRKCZ        | XLOC_010872 | 885   | coding | coding    | noncoding | noncoding |
| NM_001282670. 1 | FAAP20       | XLOC_010872 | 3576  | coding | coding    | coding    | coding    |
| MSTRG. 140. 1   |              | XLOC_010874 | 221   | coding | noncoding | noncoding | noncoding |
| XR_946873. 2    | LOC105378604 | XLOC_010914 | 11969 | coding | noncoding | coding    | noncoding |
| MSTRG. 398. 1   | TP73         | XLOC_010932 | 299   | coding | noncoding | coding    | noncoding |
| MSTRG. 409. 1   | LRRC47       | XLOC_010938 | 284   | coding | noncoding | noncoding | noncoding |
| MSTRG. 413. 1   |              | XLOC_010952 | 233   | coding | noncoding | noncoding | noncoding |
| MSTRG. 509. 1   |              | XLOC_010992 | 272   | coding | noncoding | noncoding | noncoding |
| NM_012405. 4    | ICMT         | XLOC_011016 | 4795  | coding | coding    | coding    | coding    |
| MSTRG. 533. 1   | ICMT         | XLOC_011017 | 265   | coding | noncoding | noncoding | noncoding |
| MSTRG. 536. 1   | ACOT7        | XLOC_011021 | 289   | coding | noncoding | noncoding | noncoding |
| MSTRG. 537. 1   | ACOT7        | XLOC_011022 | 265   | coding | noncoding | noncoding | noncoding |
| MSTRG. 539. 1   | ACOT7        | XLOC_011024 | 248   | coding | noncoding | noncoding | noncoding |
| MSTRG. 548. 2   | ESPN         | XLOC_011030 | 1650  | coding | coding    | coding    | noncoding |
| MSTRG. 552. 1   | ESPN         | XLOC_011032 | 246   | coding | noncoding | noncoding | noncoding |
| MSTRG. 601. 1   |              | XLOC_011049 | 270   | coding | noncoding | noncoding | noncoding |
| MSTRG. 665. 1   | CAMTA1       | XLOC_011065 | 261   | coding | noncoding | noncoding | noncoding |
| MSTRG. 620. 1   | TNFRSF9      | XLOC_011097 | 254   | coding | noncoding | noncoding | noncoding |
| MSTRG. 626. 4   | PARK7        | XLOC_011098 | 854   | coding | coding    | noncoding | noncoding |
| MSTRG. 632. 1   |              | XLOC_011104 | 286   | coding | noncoding | noncoding | noncoding |
| MSTRG. 634. 1   |              | XLOC_011105 | 266   | coding | coding    | noncoding | noncoding |
| MSTRG. 705. 1   |              | XLOC_011107 | 307   | coding | noncoding | noncoding | noncoding |
| MSTRG. 703. 1   |              | XLOC_011108 | 299   | coding | noncoding | noncoding | noncoding |
| MSTRG. 702. 1   |              | XLOC_011110 | 221   | coding | noncoding | noncoding | noncoding |
| MSTRG. 977. 1   | RERE         | XLOC_011131 | 365   | coding | noncoding | noncoding | noncoding |
| MSTRG. 991. 1   |              | XLOC_011142 | 353   | coding | noncoding | noncoding | noncoding |
| XM_011540824. 2 | SLC2A7       | XLOC_011149 | 1739  | coding | coding    | coding    | coding    |
| MSTRG. 740. 1   | SLC2A7       | XLOC_011150 | 293   | coding | noncoding | noncoding | noncoding |
| MSTRG. 771. 1   | LNCTAM34A    | XLOC_011159 | 272   | coding | noncoding | noncoding | noncoding |
| NR_104622. 2    | LINC02606    | XLOC_011174 | 2363  | coding | noncoding | coding    | noncoding |
| MSTRG. 790. 1   |              | XLOC_011177 | 235   | coding | noncoding | noncoding | noncoding |
| MSTRG. 834. 8   | PIK3CD       | XLOC_011186 | 5138  | coding | coding    | coding    | coding    |
| NR_027045. 1    | PIK3CD-AS1   | XLOC_011188 | 1823  | coding | noncoding | coding    | coding    |
| MSTRG. 821. 1   | LZIC         | XLOC_011198 | 259   | coding | noncoding | noncoding | noncoding |
| MSTRG. 824. 2   | NMNAT1       | XLOC_011200 | 1038  | coding | coding    | noncoding | noncoding |
| MSTRG. 848. 7   | UBE4B        | XLOC_011204 | 2159  | coding | noncoding | noncoding | noncoding |
| MSTRG. 859. 1   |              | XLOC_011222 | 288   | coding | noncoding | noncoding | noncoding |
| MSTRG. 937. 1   |              | XLOC_011239 | 439   | coding | noncoding | noncoding | noncoding |
| NM_012168. 6    | FBXO2        | XLOC_011249 | 1287  | coding | coding    | coding    | coding    |
| XM_005263460. 5 | MTHFR        | XLOC_011260 | 3245  | coding | coding    | coding    | coding    |
| MSTRG. 1027. 1  |              | XLOC_011270 | 301   | coding | noncoding | noncoding | noncoding |
| MSTRG. 1032. 1  |              | XLOC_011271 | 281   | coding | noncoding | noncoding | noncoding |
| MSTRG. 1067. 1  | TNFRSF8      | XLOC_011278 | 433   | coding | noncoding | noncoding | noncoding |

|                 |              |             |      |        |           |           |           |
|-----------------|--------------|-------------|------|--------|-----------|-----------|-----------|
| MSTRG. 1069. 1  | TNFRSF8      | XLOC_011279 | 269  | coding | noncoding | noncoding | noncoding |
| MSTRG. 1081. 1  | AADACL4      | XLOC_011298 | 304  | coding | coding    | noncoding | noncoding |
| MSTRG. 1099. 1  |              | XLOC_011319 | 271  | coding | noncoding | noncoding | noncoding |
| MSTRG. 1104. 1  |              | XLOC_011324 | 238  | coding | noncoding | noncoding | noncoding |
| MSTRG. 1111. 1  |              | XLOC_011325 | 285  | coding | noncoding | noncoding | noncoding |
| MSTRG. 1112. 1  |              | XLOC_011326 | 266  | coding | noncoding | noncoding | noncoding |
| MSTRG. 1113. 1  |              | XLOC_011327 | 284  | coding | noncoding | noncoding | noncoding |
| MSTRG. 1285. 1  | KAZN         | XLOC_011349 | 314  | coding | noncoding | noncoding | noncoding |
| XM_017002222. 2 | C1orf195     | XLOC_011401 | 1366 | coding | noncoding | noncoding | noncoding |
| MSTRG. 1174. 1  | FHAD1        | XLOC_011409 | 250  | coding | noncoding | noncoding | noncoding |
| MSTRG. 1178. 1  | FHAD1        | XLOC_011411 | 361  | coding | noncoding | noncoding | noncoding |
| MSTRG. 1164. 4  | DNAJC16      | XLOC_011424 | 421  | coding | coding    | noncoding | noncoding |
| MSTRG. 1159. 1  |              | XLOC_011425 | 228  | coding | noncoding | noncoding | noncoding |
| MSTRG. 1161. 1  |              | XLOC_011427 | 267  | coding | noncoding | noncoding | noncoding |
| MSTRG. 1242. 1  |              | XLOC_011433 | 241  | coding | coding    | coding    | noncoding |
| MSTRG. 1243. 1  | UQCRHL       | XLOC_011434 | 255  | coding | noncoding | noncoding | noncoding |
| MSTRG. 1373. 1  |              | XLOC_011437 | 303  | coding | noncoding | noncoding | noncoding |
| XR_946991. 2    | ANO7L1       | XLOC_011445 | 1466 | coding | noncoding | coding    | noncoding |
| MSTRG. 1413. 1  | FBXO42       | XLOC_011451 | 214  | coding | noncoding | noncoding | noncoding |
| MSTRG. 1396. 1  |              | XLOC_011455 | 303  | coding | noncoding | noncoding | noncoding |
| NR_023386. 1    | CROCCP3      | XLOC_011458 | 5368 | coding | coding    | coding    | coding    |
| NR_135764. 1    | LINC01783    | XLOC_011465 | 1546 | coding | noncoding | coding    | noncoding |
| MSTRG. 1460. 1  | LOC105376794 | XLOC_011471 | 711  | coding | noncoding | noncoding | noncoding |
| MSTRG. 1463. 1  |              | XLOC_011473 | 321  | coding | noncoding | noncoding | noncoding |
| MSTRG. 1464. 1  |              | XLOC_011474 | 289  | coding | noncoding | noncoding | noncoding |
| MSTRG. 1468. 1  | MST1P2       | XLOC_011477 | 399  | coding | noncoding | noncoding | noncoding |
| MSTRG. 1506. 1  | SDHB         | XLOC_011505 | 219  | coding | noncoding | noncoding | noncoding |
| MSTRG. 1510. 1  | SDHB         | XLOC_011509 | 291  | coding | noncoding | noncoding | noncoding |
| MSTRG. 1520. 1  | PADI2        | XLOC_011514 | 310  | coding | noncoding | noncoding | noncoding |
| MSTRG. 1534. 1  | ACTL8        | XLOC_011531 | 210  | coding | noncoding | noncoding | noncoding |
| MSTRG. 1559. 1  | IGSF21       | XLOC_011539 | 494  | coding | noncoding | noncoding | noncoding |
| MSTRG. 1553. 1  |              | XLOC_011546 | 234  | coding | noncoding | noncoding | noncoding |
| MSTRG. 1575. 1  | ALDH4A1      | XLOC_011554 | 258  | coding | noncoding | noncoding | noncoding |
| MSTRG. 1615. 1  | IFFO2        | XLOC_011560 | 245  | coding | noncoding | noncoding | noncoding |
| MSTRG. 1775. 1  | LOC105376815 | XLOC_011563 | 285  | coding | noncoding | noncoding | noncoding |
| XM_024450096. 1 | CAPZB        | XLOC_011582 | 1782 | coding | coding    | coding    | coding    |
| MSTRG. 1618. 1  |              | XLOC_011601 | 239  | coding | noncoding | noncoding | noncoding |
| MSTRG. 1628. 1  | HTR6         | XLOC_011609 | 675  | coding | noncoding | noncoding | noncoding |
| MSTRG. 1738. 1  | TMCO4        | XLOC_011617 | 267  | coding | noncoding | noncoding | noncoding |
| MSTRG. 1694. 1  | PLA2G5       | XLOC_011632 | 285  | coding | noncoding | noncoding | noncoding |
| NM_012400. 4    | PLA2G2D      | XLOC_011636 | 2651 | coding | coding    | coding    | coding    |
| MSTRG. 1681. 1  |              | XLOC_011637 | 380  | coding | noncoding | noncoding | noncoding |
| MSTRG. 1702. 1  | PLA2G2F      | XLOC_011638 | 288  | coding | noncoding | noncoding | noncoding |

|                 |          |             |       |        |           |           |           |
|-----------------|----------|-------------|-------|--------|-----------|-----------|-----------|
| MSTRG. 1705. 1  |          | XLOC_011644 | 213   | coding | noncoding | noncoding | noncoding |
| MSTRG. 1744. 1  |          | XLOC_011655 | 263   | coding | noncoding | noncoding | noncoding |
| MSTRG. 1747. 1  |          | XLOC_011656 | 316   | coding | noncoding | noncoding | noncoding |
| MSTRG. 1766. 3  | PINK1-AS | XLOC_011660 | 2013  | coding | coding    | coding    | coding    |
| MSTRG. 1803. 1  | KIF17    | XLOC_011662 | 270   | coding | noncoding | noncoding | noncoding |
| XR_001737206. 2 | HP1BP3   | XLOC_011667 | 4589  | coding | coding    | coding    | coding    |
| MSTRG. 1916. 1  | EIF4G3   | XLOC_011690 | 284   | coding | noncoding | noncoding | noncoding |
| MSTRG. 1827. 1  | ECE1     | XLOC_011697 | 500   | coding | noncoding | noncoding | noncoding |
| MSTRG. 1830. 1  | ECE1     | XLOC_011700 | 296   | coding | noncoding | noncoding | noncoding |
| MSTRG. 1817. 1  |          | XLOC_011704 | 261   | coding | noncoding | noncoding | noncoding |
| MSTRG. 1930. 1  | USP48    | XLOC_011733 | 387   | coding | noncoding | noncoding | noncoding |
| MSTRG. 1866. 1  |          | XLOC_011742 | 267   | coding | noncoding | noncoding | noncoding |
| MSTRG. 1869. 1  | CELA3B   | XLOC_011744 | 276   | coding | noncoding | noncoding | noncoding |
| MSTRG. 1962. 5  | CDC42    | XLOC_011746 | 3344  | coding | coding    | noncoding | noncoding |
| MSTRG. 1933. 1  |          | XLOC_011768 | 284   | coding | noncoding | noncoding | noncoding |
| MSTRG. 2040. 1  |          | XLOC_011798 | 272   | coding | noncoding | noncoding | noncoding |
| MSTRG. 2046. 1  |          | XLOC_011800 | 225   | coding | noncoding | noncoding | noncoding |
| MSTRG. 2051. 1  | RPL11    | XLOC_011801 | 621   | coding | coding    | noncoding | coding    |
| MSTRG. 2055. 1  |          | XLOC_011807 | 266   | coding | noncoding | noncoding | noncoding |
| MSTRG. 2056. 1  |          | XLOC_011808 | 268   | coding | noncoding | noncoding | noncoding |
| MSTRG. 2088. 1  | CNR2     | XLOC_011823 | 297   | coding | noncoding | noncoding | noncoding |
| MSTRG. 2115. 2  | SRSF10   | XLOC_011824 | 13754 | coding | coding    | noncoding | noncoding |
| MSTRG. 2115. 6  | SRSF10   | XLOC_011824 | 7762  | coding | coding    | noncoding | noncoding |
| MSTRG. 2090. 1  |          | XLOC_011826 | 243   | coding | noncoding | noncoding | noncoding |
| MSTRG. 2129. 1  | GRHL3    | XLOC_011840 | 232   | coding | noncoding | noncoding | noncoding |
| MSTRG. 2118. 12 | RCAN3    | XLOC_011847 | 2771  | coding | coding    | noncoding | coding    |
| MSTRG. 2200. 1  | NCMAP    | XLOC_011851 | 270   | coding | noncoding | noncoding | noncoding |
| MSTRG. 2150. 1  |          | XLOC_011854 | 236   | coding | noncoding | noncoding | noncoding |
| MSTRG. 2152. 1  |          | XLOC_011856 | 239   | coding | noncoding | noncoding | noncoding |
| MSTRG. 2175. 1  |          | XLOC_011878 | 242   | coding | noncoding | noncoding | noncoding |
| MSTRG. 2191. 1  |          | XLOC_011884 | 238   | coding | noncoding | noncoding | noncoding |
| NR_135784. 2    | RSRP1    | XLOC_011890 | 2829  | coding | coding    | coding    | coding    |
| NR_135793. 1    | RSRP1    | XLOC_011890 | 3356  | coding | coding    | coding    | noncoding |
| MSTRG. 2234. 4  | MACO1    | XLOC_011894 | 1864  | coding | coding    | noncoding | coding    |
| MSTRG. 2243. 1  | LDLRAP1  | XLOC_011899 | 238   | coding | noncoding | noncoding | noncoding |
| MSTRG. 2313. 2  | MAN1C1   | XLOC_011905 | 2371  | coding | coding    | coding    | noncoding |
| NM_001145454. 3 | STMN1    | XLOC_011914 | 2162  | coding | coding    | coding    | coding    |
| MSTRG. 2267. 1  |          | XLOC_011917 | 305   | coding | noncoding | noncoding | noncoding |
| MSTRG. 2297. 1  | C1orf232 | XLOC_011932 | 253   | coding | noncoding | noncoding | noncoding |
| MSTRG. 2311. 1  | CATSPER4 | XLOC_011935 | 298   | coding | noncoding | noncoding | noncoding |
| MSTRG. 2349. 1  |          | XLOC_011954 | 255   | coding | noncoding | noncoding | noncoding |
| MSTRG. 2391. 1  | GPN2     | XLOC_011956 | 258   | coding | noncoding | noncoding | noncoding |
| MSTRG. 2413. 1  |          | XLOC_011969 | 275   | coding | noncoding | noncoding | noncoding |

|                |              |             |      |        |           |           |           |
|----------------|--------------|-------------|------|--------|-----------|-----------|-----------|
| XR_946795.3    | MAP3K6       | XLOC_011981 | 5526 | coding | coding    | coding    | coding    |
| MSTRG.2440.1   |              | XLOC_011993 | 208  | coding | noncoding | noncoding | noncoding |
| MSTRG.2476.1   |              | XLOC_012008 | 297  | coding | noncoding | noncoding | noncoding |
| MSTRG.2545.4   | XKR8         | XLOC_012016 | 1934 | coding | coding    | coding    | coding    |
| MSTRG.2563.1   | EYA3         | XLOC_012030 | 302  | coding | noncoding | noncoding | noncoding |
| MSTRG.2568.1   |              | XLOC_012035 | 263  | coding | noncoding | noncoding | noncoding |
| MSTRG.2569.1   |              | XLOC_012036 | 274  | coding | noncoding | noncoding | noncoding |
| MSTRG.2588.1   |              | XLOC_012058 | 235  | coding | noncoding | noncoding | noncoding |
| MSTRG.2589.1   |              | XLOC_012059 | 266  | coding | noncoding | noncoding | noncoding |
| MSTRG.2624.1   |              | XLOC_012065 | 385  | coding | noncoding | noncoding | noncoding |
| MSTRG.2611.1   |              | XLOC_012067 | 289  | coding | noncoding | noncoding | noncoding |
| MSTRG.2669.1   |              | XLOC_012086 | 257  | coding | noncoding | noncoding | noncoding |
| MSTRG.2701.1   |              | XLOC_012112 | 289  | coding | noncoding | noncoding | noncoding |
| MSTRG.2708.1   | LOC105378617 | XLOC_012114 | 306  | coding | noncoding | noncoding | noncoding |
| MSTRG.2717.1   | LOC105378618 | XLOC_012116 | 237  | coding | noncoding | noncoding | noncoding |
| MSTRG.2726.1   |              | XLOC_012123 | 227  | coding | noncoding | noncoding | noncoding |
| XM_011542464.2 | SDC3         | XLOC_012133 | 5326 | coding | coding    | coding    | coding    |
| MSTRG.2755.1   |              | XLOC_012147 | 488  | coding | noncoding | noncoding | noncoding |
| MSTRG.2763.1   | NKAIN1       | XLOC_012149 | 222  | coding | noncoding | noncoding | noncoding |
| MSTRG.2813.1   | SNRNP40      | XLOC_012152 | 259  | coding | noncoding | noncoding | noncoding |
| MSTRG.2783.1   |              | XLOC_012156 | 247  | coding | noncoding | noncoding | noncoding |
| MSTRG.2787.1   |              | XLOC_012161 | 261  | coding | noncoding | noncoding | noncoding |
| MSTRG.2803.1   |              | XLOC_012169 | 324  | coding | noncoding | noncoding | noncoding |
| MSTRG.2805.1   |              | XLOC_012171 | 227  | coding | noncoding | noncoding | noncoding |
| MSTRG.2847.1   | COL16A1      | XLOC_012176 | 285  | coding | noncoding | noncoding | noncoding |
| NM_144569.6    | SPOCD1       | XLOC_012182 | 3962 | coding | coding    | coding    | coding    |
| MSTRG.2839.1   | SPOCD1       | XLOC_012184 | 286  | coding | noncoding | noncoding | noncoding |
| MSTRG.2870.1   | KPNA6        | XLOC_012196 | 7787 | coding | coding    | coding    | noncoding |
| MSTRG.2870.5   | KPNA6        | XLOC_012196 | 7054 | coding | coding    | coding    | noncoding |
| MSTRG.2890.1   | MTMR9LP      | XLOC_012204 | 261  | coding | noncoding | noncoding | noncoding |
| MSTRG.2895.1   |              | XLOC_012215 | 224  | coding | noncoding | noncoding | noncoding |
| MSTRG.2899.1   | ZBTB8B       | XLOC_012216 | 209  | coding | noncoding | noncoding | noncoding |
| XM_011541327.3 | ZBTB8OS      | XLOC_012219 | 1506 | coding | coding    | coding    | coding    |
| MSTRG.2914.1   |              | XLOC_012223 | 270  | coding | noncoding | noncoding | noncoding |
| MSTRG.2918.1   |              | XLOC_012224 | 244  | coding | noncoding | noncoding | noncoding |
| MSTRG.2945.1   | KIAA1522     | XLOC_012227 | 335  | coding | noncoding | noncoding | noncoding |
| MSTRG.2947.9   | YARS         | XLOC_012229 | 1288 | coding | coding    | noncoding | noncoding |
| MSTRG.2928.1   |              | XLOC_012237 | 294  | coding | noncoding | noncoding | noncoding |
| MSTRG.2966.1   |              | XLOC_012246 | 255  | coding | noncoding | noncoding | noncoding |
| MSTRG.2976.1   |              | XLOC_012267 | 318  | coding | noncoding | noncoding | noncoding |
| MSTRG.2981.1   |              | XLOC_012270 | 312  | coding | noncoding | noncoding | noncoding |
| MSTRG.3142.1   | CSMD2        | XLOC_012309 | 308  | coding | noncoding | noncoding | noncoding |
| MSTRG.3103.1   |              | XLOC_012329 | 241  | coding | noncoding | noncoding | noncoding |

|                 |              |             |       |        |           |           |           |
|-----------------|--------------|-------------|-------|--------|-----------|-----------|-----------|
| MSTRG. 3176. 3  | ZMYM1        | XLOC_012339 | 1969  | coding | coding    | noncoding | coding    |
| MSTRG. 3157. 1  |              | XLOC_012340 | 291   | coding | coding    | noncoding | noncoding |
| MSTRG. 3158. 1  | LOC105378644 | XLOC_012341 | 253   | coding | noncoding | noncoding | noncoding |
| XM_017002053. 2 | SFPQ         | XLOC_012344 | 8892  | coding | coding    | coding    | coding    |
| MSTRG. 3220. 1  | KIAA0319L    | XLOC_012355 | 258   | coding | noncoding | noncoding | noncoding |
| MSTRG. 3236. 1  | TFAP2E       | XLOC_012365 | 240   | coding | noncoding | noncoding | noncoding |
| MSTRG. 3246. 1  | PSMB2        | XLOC_012372 | 245   | coding | noncoding | noncoding | noncoding |
| MSTRG. 3247. 1  | PSMB2        | XLOC_012373 | 297   | coding | noncoding | noncoding | noncoding |
| MSTRG. 3192. 1  |              | XLOC_012376 | 337   | coding | noncoding | noncoding | noncoding |
| NM_001348691. 1 | C1orf216     | XLOC_012377 | 2862  | coding | coding    | coding    | coding    |
| MSTRG. 3292. 2  | AGO3         | XLOC_012383 | 3234  | coding | coding    | noncoding | coding    |
| MSTRG. 3350. 6  | THRAP3       | XLOC_012398 | 4306  | coding | coding    | coding    | noncoding |
| MSTRG. 3356. 1  | SH3D21       | XLOC_012401 | 286   | coding | noncoding | noncoding | noncoding |
| MSTRG. 3271. 1  |              | XLOC_012417 | 316   | coding | noncoding | noncoding | noncoding |
| MSTRG. 3273. 1  |              | XLOC_012419 | 273   | coding | noncoding | noncoding | noncoding |
| NR_073091. 1    | MEAF6        | XLOC_012460 | 4846  | coding | coding    | coding    | coding    |
| NR_073090. 1    | MEAF6        | XLOC_012460 | 4876  | coding | coding    | coding    | coding    |
| MSTRG. 3406. 1  | DNALI1       | XLOC_012466 | 215   | coding | noncoding | noncoding | noncoding |
| MSTRG. 3415. 1  | CDCA8        | XLOC_012474 | 411   | coding | coding    | coding    | noncoding |
| MSTRG. 3438. 1  | INPP5B       | XLOC_012486 | 598   | coding | noncoding | noncoding | noncoding |
| MSTRG. 3489. 1  | LOC105378657 | XLOC_012513 | 209   | coding | noncoding | noncoding | noncoding |
| MSTRG. 3476. 1  |              | XLOC_012518 | 293   | coding | noncoding | noncoding | noncoding |
| MSTRG. 3477. 1  |              | XLOC_012519 | 313   | coding | noncoding | noncoding | noncoding |
| MSTRG. 3499. 1  |              | XLOC_012523 | 284   | coding | noncoding | noncoding | noncoding |
| MSTRG. 3528. 1  | GJA9-MYCBP   | XLOC_012535 | 258   | coding | noncoding | noncoding | noncoding |
| MSTRG. 3535. 1  | RHBDL2       | XLOC_012538 | 309   | coding | noncoding | noncoding | noncoding |
| MSTRG. 3506. 1  |              | XLOC_012539 | 302   | coding | noncoding | noncoding | noncoding |
| MSTRG. 3508. 1  |              | XLOC_012540 | 257   | coding | noncoding | noncoding | noncoding |
| MSTRG. 3509. 1  |              | XLOC_012541 | 282   | coding | noncoding | noncoding | noncoding |
| MSTRG. 3644. 1  |              | XLOC_012548 | 273   | coding | noncoding | noncoding | noncoding |
| MSTRG. 3666. 8  | MACF1        | XLOC_012563 | 17653 | coding | coding    | noncoding | coding    |
| MSTRG. 3666. 11 | MACF1        | XLOC_012563 | 10941 | coding | coding    | coding    | noncoding |
| MSTRG. 3666. 17 | MACF1        | XLOC_012563 | 3689  | coding | coding    | noncoding | noncoding |
| MSTRG. 3666. 21 | MACF1        | XLOC_012563 | 23075 | coding | coding    | coding    | coding    |
| MSTRG. 3539. 1  | BMP8A        | XLOC_012567 | 246   | coding | noncoding | noncoding | noncoding |
| MSTRG. 3553. 1  |              | XLOC_012575 | 247   | coding | noncoding | noncoding | noncoding |
| MSTRG. 3561. 1  |              | XLOC_012580 | 303   | coding | noncoding | noncoding | noncoding |
| XM_005270954. 2 | TRIT1        | XLOC_012589 | 2353  | coding | coding    | coding    | coding    |
| MSTRG. 3600. 1  | TRIT1        | XLOC_012593 | 305   | coding | noncoding | noncoding | noncoding |
| MSTRG. 3628. 9  | PPT1         | XLOC_012601 | 2578  | coding | coding    | coding    | coding    |
| MSTRG. 3633. 3  | ZMPSTE24     | XLOC_012604 | 2855  | coding | coding    | noncoding | noncoding |
| MSTRG. 3726. 1  |              | XLOC_012628 | 265   | coding | noncoding | noncoding | noncoding |
| NR_135092. 1    | SCMH1        | XLOC_012651 | 3401  | coding | coding    | coding    | coding    |

|                 |              |             |      |        |           |           |           |
|-----------------|--------------|-------------|------|--------|-----------|-----------|-----------|
| MSTRG. 3797. 1  | SCMH1        | XLOC_012661 | 443  | coding | noncoding | noncoding | noncoding |
| MSTRG. 3804. 1  | SCMH1        | XLOC_012663 | 228  | coding | noncoding | noncoding | noncoding |
| MSTRG. 4156. 1  | HIVEP3       | XLOC_012680 | 249  | coding | noncoding | noncoding | noncoding |
| MSTRG. 4195. 1  | HIVEP3       | XLOC_012688 | 242  | coding | noncoding | noncoding | noncoding |
| MSTRG. 3859. 2  | C1orf50      | XLOC_012756 | 732  | coding | coding    | noncoding | noncoding |
| NM_199342. 4    | SVBP         | XLOC_012761 | 807  | coding | coding    | noncoding | noncoding |
| MSTRG. 3874. 2  | SVBP         | XLOC_012761 | 3979 | coding | coding    | coding    | noncoding |
| MSTRG. 3865. 1  |              | XLOC_012767 | 211  | coding | noncoding | noncoding | noncoding |
| MSTRG. 3882. 1  |              | XLOC_012768 | 383  | coding | noncoding | noncoding | noncoding |
| MSTRG. 3895. 1  |              | XLOC_012772 | 254  | coding | noncoding | noncoding | noncoding |
| MSTRG. 3951. 1  | CFAP57       | XLOC_012780 | 292  | coding | noncoding | noncoding | noncoding |
| MSTRG. 3903. 1  | TMEM125      | XLOC_012781 | 284  | coding | coding    | noncoding | noncoding |
| MSTRG. 3904. 1  |              | XLOC_012784 | 370  | coding | noncoding | noncoding | noncoding |
| MSTRG. 3954. 1  | TIE1         | XLOC_012786 | 245  | coding | coding    | noncoding | noncoding |
| MSTRG. 3945. 1  |              | XLOC_012787 | 266  | coding | noncoding | noncoding | noncoding |
| MSTRG. 3973. 1  | PTPRF        | XLOC_012809 | 561  | coding | coding    | coding    | noncoding |
| MSTRG. 3966. 1  |              | XLOC_012813 | 293  | coding | noncoding | noncoding | noncoding |
| MSTRG. 4029. 2  | LOC107984948 | XLOC_012832 | 915  | coding | noncoding | noncoding | noncoding |
| MSTRG. 4244. 5  | LOC107984950 | XLOC_012857 | 1916 | coding | coding    | coding    | coding    |
| MSTRG. 4272. 3  | PTCH2        | XLOC_012873 | 313  | coding | noncoding | noncoding | noncoding |
| MSTRG. 4274. 1  |              | XLOC_012875 | 249  | coding | noncoding | noncoding | noncoding |
| MSTRG. 4310. 1  | ZSWIM5       | XLOC_012885 | 258  | coding | noncoding | noncoding | noncoding |
| MSTRG. 4289. 1  |              | XLOC_012889 | 462  | coding | noncoding | noncoding | noncoding |
| MSTRG. 4293. 1  |              | XLOC_012893 | 253  | coding | noncoding | noncoding | noncoding |
| MSTRG. 4297. 1  |              | XLOC_012896 | 269  | coding | noncoding | noncoding | noncoding |
| MSTRG. 4368. 1  | TESK2        | XLOC_012906 | 240  | coding | noncoding | noncoding | noncoding |
| XM_017000457. 1 | CCDC17       | XLOC_012914 | 2293 | coding | noncoding | coding    | coding    |
| MSTRG. 4371. 10 | GPBP1L1      | XLOC_012915 | 3422 | coding | coding    | coding    | coding    |
| MSTRG. 4380. 1  | IPP          | XLOC_012917 | 296  | coding | noncoding | noncoding | noncoding |
| MSTRG. 4369. 1  |              | XLOC_012918 | 241  | coding | noncoding | noncoding | noncoding |
| MSTRG. 4406. 1  | PIK3R3       | XLOC_012933 | 239  | coding | noncoding | noncoding | noncoding |
| MSTRG. 4407. 1  | PIK3R3       | XLOC_012934 | 227  | coding | noncoding | noncoding | noncoding |
| MSTRG. 4384. 1  |              | XLOC_012942 | 239  | coding | noncoding | noncoding | noncoding |
| MSTRG. 4435. 1  |              | XLOC_012948 | 264  | coding | noncoding | noncoding | noncoding |
| MSTRG. 4454. 1  | DMBX1        | XLOC_012958 | 257  | coding | noncoding | noncoding | noncoding |
| XM_024450514. 1 | MKNK1        | XLOC_012961 | 2930 | coding | coding    | coding    | coding    |
| MSTRG. 4476. 1  |              | XLOC_012976 | 279  | coding | noncoding | noncoding | noncoding |
| MSTRG. 4477. 1  | CYP4Z2P      | XLOC_012977 | 407  | coding | noncoding | noncoding | noncoding |
| MSTRG. 4500. 1  | CYP4X1       | XLOC_012984 | 243  | coding | noncoding | noncoding | noncoding |
| MSTRG. 4504. 1  | CYP4X1       | XLOC_012987 | 242  | coding | noncoding | noncoding | noncoding |
| MSTRG. 4511. 1  |              | XLOC_012990 | 393  | coding | coding    | noncoding | noncoding |
| MSTRG. 4515. 1  |              | XLOC_012993 | 226  | coding | noncoding | noncoding | noncoding |
| XR_001737370. 1 | STIL         | XLOC_013002 | 5138 | coding | coding    | coding    | coding    |

|                 |              |             |       |        |           |           |           |
|-----------------|--------------|-------------|-------|--------|-----------|-----------|-----------|
| MSTRG. 4587. 1  | STIL         | XLOC_013004 | 220   | coding | noncoding | noncoding | noncoding |
| MSTRG. 4588. 1  |              | XLOC_013005 | 277   | coding | noncoding | noncoding | noncoding |
| MSTRG. 4535. 1  |              | XLOC_013017 | 401   | coding | noncoding | noncoding | noncoding |
| MSTRG. 4562. 1  |              | XLOC_013025 | 267   | coding | noncoding | noncoding | noncoding |
| MSTRG. 4568. 1  |              | XLOC_013034 | 287   | coding | noncoding | noncoding | noncoding |
| MSTRG. 4662. 1  | SPATA6       | XLOC_013050 | 251   | coding | noncoding | noncoding | noncoding |
| MSTRG. 4665. 1  | SPATA6       | XLOC_013053 | 464   | coding | noncoding | noncoding | noncoding |
| MSTRG. 4671. 4  | SPATA6       | XLOC_013058 | 1206  | coding | coding    | noncoding | noncoding |
| XM_011542310. 2 | AGBL4        | XLOC_013067 | 2427  | coding | coding    | coding    | coding    |
| MSTRG. 4716. 1  | AGBL4        | XLOC_013077 | 295   | coding | noncoding | noncoding | noncoding |
| MSTRG. 4727. 1  | LOC107984954 | XLOC_013083 | 307   | coding | coding    | noncoding | noncoding |
| MSTRG. 4730. 1  | AGBL4        | XLOC_013084 | 295   | coding | noncoding | coding    | noncoding |
| MSTRG. 4650. 1  | ELAVL4       | XLOC_013100 | 276   | coding | noncoding | noncoding | noncoding |
| MSTRG. 4848. 1  | FAF1         | XLOC_013124 | 223   | coding | noncoding | noncoding | noncoding |
| MSTRG. 4753. 1  |              | XLOC_013136 | 303   | coding | noncoding | noncoding | noncoding |
| MSTRG. 4759. 1  | C1orf185     | XLOC_013139 | 270   | coding | noncoding | noncoding | noncoding |
| NR_147076. 1    | LINC01562    | XLOC_013142 | 2366  | coding | noncoding | noncoding | noncoding |
| NM_001981. 3    | EPS15        | XLOC_013151 | 5163  | coding | coding    | coding    | coding    |
| XM_005270618. 3 | EPS15        | XLOC_013151 | 4937  | coding | coding    | coding    | coding    |
| MSTRG. 4800. 1  | EPS15        | XLOC_013167 | 282   | coding | noncoding | noncoding | noncoding |
| MSTRG. 4944. 13 | MIR761       | XLOC_013177 | 1012  | coding | coding    | coding    | coding    |
| NM_002867. 4    | RAB3B        | XLOC_013179 | 12780 | coding | coding    | coding    | coding    |
| MSTRG. 4814. 1  | RAB3B        | XLOC_013181 | 414   | coding | noncoding | noncoding | noncoding |
| MSTRG. 4816. 1  |              | XLOC_013182 | 248   | coding | noncoding | noncoding | noncoding |
| XM_017001389. 2 | ORC1         | XLOC_013203 | 3202  | coding | coding    | coding    | coding    |
| MSTRG. 4889. 1  |              | XLOC_013215 | 269   | coding | noncoding | noncoding | noncoding |
| MSTRG. 4911. 1  |              | XLOC_013222 | 3119  | coding | noncoding | noncoding | noncoding |
| MSTRG. 4914. 1  |              | XLOC_013227 | 235   | coding | noncoding | noncoding | noncoding |
| MSTRG. 4939. 1  | ZYG11A       | XLOC_013228 | 237   | coding | noncoding | noncoding | noncoding |
| XM_011542002. 2 | SLC1A7       | XLOC_013235 | 2372  | coding | coding    | coding    | coding    |
| XR_001738058. 1 | LINC02812    | XLOC_013249 | 3768  | coding | noncoding | coding    | noncoding |
| MSTRG. 5068. 1  |              | XLOC_013292 | 244   | coding | noncoding | noncoding | noncoding |
| MSTRG. 5091. 1  | MROH7        | XLOC_013303 | 286   | coding | noncoding | noncoding | noncoding |
| MSTRG. 5092. 1  | MROH7-TTC4   | XLOC_013304 | 385   | coding | noncoding | noncoding | noncoding |
| MSTRG. 5251. 1  | USP24        | XLOC_013336 | 306   | coding | noncoding | noncoding | noncoding |
| MSTRG. 5152. 1  |              | XLOC_013363 | 245   | coding | noncoding | noncoding | noncoding |
| MSTRG. 5195. 1  | LOC105378737 | XLOC_013367 | 258   | coding | noncoding | noncoding | noncoding |
| XR_001738063. 1 | LOC105378741 | XLOC_013368 | 6829  | coding | noncoding | noncoding | noncoding |
| MSTRG. 5199. 1  | LOC105378741 | XLOC_013371 | 274   | coding | noncoding | noncoding | noncoding |
| MSTRG. 5159. 1  |              | XLOC_013374 | 256   | coding | noncoding | noncoding | noncoding |
| MSTRG. 5211. 1  |              | XLOC_013381 | 368   | coding | noncoding | noncoding | noncoding |
| MSTRG. 5216. 1  | PLPP3        | XLOC_013384 | 386   | coding | noncoding | noncoding | noncoding |
| MSTRG. 5212. 1  |              | XLOC_013389 | 251   | coding | noncoding | noncoding | noncoding |

|                 |              |             |      |        |           |           |           |
|-----------------|--------------|-------------|------|--------|-----------|-----------|-----------|
| MSTRG. 5225. 1  | PRKAA2       | XLOC_013392 | 279  | coding | noncoding | noncoding | noncoding |
| MSTRG. 5403. 1  | DAB1         | XLOC_013408 | 267  | coding | noncoding | noncoding | noncoding |
| MSTRG. 5497. 1  | DAB1         | XLOC_013425 | 316  | coding | noncoding | noncoding | noncoding |
| MSTRG. 5335. 1  |              | XLOC_013436 | 269  | coding | noncoding | noncoding | noncoding |
| MSTRG. 5355. 1  |              | XLOC_013445 | 213  | coding | noncoding | noncoding | noncoding |
| MSTRG. 5564. 1  |              | XLOC_013525 | 257  | coding | noncoding | noncoding | noncoding |
| NM_152377. 3    | C1orf87      | XLOC_013563 | 2028 | coding | coding    | coding    | coding    |
| MSTRG. 5675. 1  | C1orf87      | XLOC_013564 | 246  | coding | noncoding | noncoding | noncoding |
| MSTRG. 5687. 1  |              | XLOC_013571 | 276  | coding | noncoding | noncoding | noncoding |
| MSTRG. 5689. 1  |              | XLOC_013572 | 211  | coding | noncoding | noncoding | noncoding |
| MSTRG. 5703. 1  | LOC101926964 | XLOC_013579 | 268  | coding | noncoding | noncoding | noncoding |
| MSTRG. 5764. 6  | NFIA         | XLOC_013591 | 1956 | coding | coding    | noncoding | noncoding |
| MSTRG. 5738. 1  |              | XLOC_013598 | 284  | coding | noncoding | noncoding | noncoding |
| MSTRG. 5753. 1  |              | XLOC_013615 | 317  | coding | noncoding | noncoding | noncoding |
| MSTRG. 5756. 1  |              | XLOC_013616 | 405  | coding | noncoding | noncoding | noncoding |
| MSTRG. 5837. 1  | DOCK7        | XLOC_013623 | 510  | coding | noncoding | noncoding | noncoding |
| MSTRG. 5786. 1  |              | XLOC_013631 | 237  | coding | noncoding | noncoding | noncoding |
| MSTRG. 5789. 1  |              | XLOC_013633 | 213  | coding | noncoding | noncoding | noncoding |
| MSTRG. 5814. 1  |              | XLOC_013650 | 288  | coding | coding    | noncoding | noncoding |
| MSTRG. 5939. 1  | ROR1         | XLOC_013686 | 260  | coding | noncoding | noncoding | noncoding |
| XR_947459. 2    | LOC105378773 | XLOC_013695 | 5783 | coding | coding    | coding    | coding    |
| MSTRG. 5901. 1  | UBE2U        | XLOC_013696 | 230  | coding | noncoding | noncoding | noncoding |
| MSTRG. 5903. 1  | UBE2U        | XLOC_013697 | 256  | coding | noncoding | noncoding | noncoding |
| MSTRG. 5890. 1  |              | XLOC_013706 | 299  | coding | noncoding | noncoding | noncoding |
| MSTRG. 6114. 1  | RAVER2       | XLOC_013733 | 314  | coding | noncoding | noncoding | noncoding |
| MSTRG. 6024. 1  |              | XLOC_013745 | 264  | coding | noncoding | noncoding | noncoding |
| MSTRG. 6085. 1  |              | XLOC_013755 | 216  | coding | coding    | noncoding | noncoding |
| MSTRG. 6300. 1  | PDE4B        | XLOC_013829 | 249  | coding | noncoding | noncoding | noncoding |
| MSTRG. 6324. 1  | PDE4B        | XLOC_013846 | 240  | coding | noncoding | noncoding | noncoding |
| MSTRG. 6222. 1  |              | XLOC_013899 | 304  | coding | noncoding | noncoding | noncoding |
| MSTRG. 6219. 1  | LINC01702    | XLOC_013904 | 310  | coding | noncoding | noncoding | noncoding |
| MSTRG. 6215. 1  |              | XLOC_013908 | 262  | coding | noncoding | noncoding | noncoding |
| MSTRG. 6467. 1  | GNG12-AS1    | XLOC_013914 | 262  | coding | noncoding | noncoding | noncoding |
| NM_001193334. 1 | WLS          | XLOC_013920 | 2468 | coding | coding    | coding    | coding    |
| MSTRG. 6374. 1  |              | XLOC_013943 | 273  | coding | noncoding | noncoding | noncoding |
| MSTRG. 6378. 1  |              | XLOC_013944 | 251  | coding | noncoding | noncoding | noncoding |
| MSTRG. 6402. 1  |              | XLOC_013955 | 364  | coding | noncoding | coding    | noncoding |
| MSTRG. 6404. 1  |              | XLOC_013956 | 354  | coding | noncoding | noncoding | noncoding |
| MSTRG. 6428. 1  |              | XLOC_013968 | 249  | coding | noncoding | noncoding | noncoding |
| MSTRG. 6437. 1  |              | XLOC_013971 | 325  | coding | noncoding | noncoding | noncoding |
| MSTRG. 6447. 1  |              | XLOC_013975 | 248  | coding | coding    | noncoding | noncoding |
| MSTRG. 6604. 1  | LRRRC7       | XLOC_013986 | 228  | coding | noncoding | noncoding | noncoding |
| MSTRG. 6506. 1  | ANKRD13C     | XLOC_014021 | 283  | coding | noncoding | noncoding | noncoding |

|                 |              |             |      |        |           |           |           |
|-----------------|--------------|-------------|------|--------|-----------|-----------|-----------|
| MSTRG. 6509. 1  |              | XLOC_014041 | 221  | coding | noncoding | noncoding | noncoding |
| NM_198719. 2    | PTGER3       | XLOC_014051 | 2360 | coding | coding    | coding    | coding    |
| XM_011541200. 3 | NEGR1        | XLOC_014073 | 2659 | coding | coding    | coding    | coding    |
| MSTRG. 6731. 1  | NEGR1        | XLOC_014085 | 218  | coding | noncoding | noncoding | noncoding |
| MSTRG. 6790. 1  | LOC105378797 | XLOC_014101 | 420  | coding | coding    | noncoding | noncoding |
| MSTRG. 6658. 1  | LOC105378798 | XLOC_014105 | 235  | coding | noncoding | noncoding | noncoding |
| MSTRG. 6693. 1  |              | XLOC_014126 | 265  | coding | coding    | noncoding | noncoding |
| XM_017000274. 1 | ERICH3       | XLOC_014147 | 7816 | coding | coding    | coding    | coding    |
| MSTRG. 6858. 1  | SLC44A5      | XLOC_014161 | 308  | coding | noncoding | noncoding | noncoding |
| MSTRG. 6859. 1  | SLC44A5      | XLOC_014162 | 270  | coding | coding    | noncoding | noncoding |
| MSTRG. 6866. 1  | SLC44A5      | XLOC_014166 | 238  | coding | noncoding | noncoding | noncoding |
| MSTRG. 6869. 3  | ACADM        | XLOC_014168 | 1186 | coding | coding    | noncoding | noncoding |
| MSTRG. 6911. 1  | ST6GALNAC5   | XLOC_014195 | 240  | coding | noncoding | noncoding | noncoding |
| MSTRG. 6922. 2  | PIGK         | XLOC_014201 | 431  | coding | coding    | noncoding | noncoding |
| MSTRG. 6944. 1  |              | XLOC_014240 | 298  | coding | noncoding | noncoding | noncoding |
| XM_017000723. 2 | USP33        | XLOC_014241 | 4207 | coding | coding    | coding    | coding    |
| MSTRG. 6947. 14 | USP33        | XLOC_014241 | 2858 | coding | coding    | coding    | coding    |
| MSTRG. 7178. 1  |              | XLOC_014266 | 478  | coding | noncoding | noncoding | noncoding |
| MSTRG. 6993. 1  |              | XLOC_014267 | 238  | coding | noncoding | noncoding | noncoding |
| MSTRG. 6998. 1  | GIPC2        | XLOC_014268 | 253  | coding | noncoding | noncoding | noncoding |
| MSTRG. 7001. 1  |              | XLOC_014271 | 230  | coding | noncoding | noncoding | noncoding |
| MSTRG. 7013. 1  | MGC27382     | XLOC_014275 | 297  | coding | noncoding | noncoding | noncoding |
| MSTRG. 7017. 1  |              | XLOC_014280 | 226  | coding | noncoding | noncoding | noncoding |
| MSTRG. 7036. 1  | LOC107984998 | XLOC_014292 | 269  | coding | noncoding | noncoding | noncoding |
| MSTRG. 7044. 1  |              | XLOC_014300 | 308  | coding | noncoding | noncoding | noncoding |
| MSTRG. 7059. 1  |              | XLOC_014302 | 353  | coding | noncoding | noncoding | noncoding |
| MSTRG. 7069. 1  |              | XLOC_014308 | 247  | coding | noncoding | noncoding | noncoding |
| MSTRG. 7070. 1  |              | XLOC_014309 | 264  | coding | coding    | noncoding | noncoding |
| MSTRG. 7076. 1  |              | XLOC_014312 | 265  | coding | noncoding | noncoding | noncoding |
| MSTRG. 7085. 1  |              | XLOC_014319 | 206  | coding | noncoding | noncoding | noncoding |
| MSTRG. 7088. 1  |              | XLOC_014321 | 265  | coding | noncoding | noncoding | noncoding |
| MSTRG. 7101. 1  | LINC01781    | XLOC_014326 | 274  | coding | noncoding | noncoding | noncoding |
| MSTRG. 7109. 1  |              | XLOC_014337 | 269  | coding | noncoding | noncoding | noncoding |
| MSTRG. 7198. 1  | ADGRL2       | XLOC_014359 | 268  | coding | noncoding | noncoding | noncoding |
| MSTRG. 7205. 1  | ADGRL2       | XLOC_014363 | 430  | coding | noncoding | noncoding | noncoding |
| MSTRG. 7206. 1  | ADGRL2       | XLOC_014364 | 274  | coding | noncoding | noncoding | noncoding |
| MSTRG. 7460. 1  | LOC107985037 | XLOC_014398 | 244  | coding | noncoding | noncoding | noncoding |
| MSTRG. 7476. 1  | LOC107985037 | XLOC_014401 | 219  | coding | noncoding | noncoding | noncoding |
| MSTRG. 7334. 4  | PRKACB       | XLOC_014456 | 1486 | coding | coding    | noncoding | noncoding |
| MSTRG. 7253. 1  |              | XLOC_014468 | 205  | coding | noncoding | noncoding | noncoding |
| MSTRG. 7630. 1  | SYDE2        | XLOC_014527 | 264  | coding | noncoding | noncoding | noncoding |
| MSTRG. 7685. 1  | ZNHIT6       | XLOC_014554 | 284  | coding | noncoding | noncoding | noncoding |
| MSTRG. 7709. 1  | COL24A1      | XLOC_014558 | 260  | coding | coding    | noncoding | noncoding |

|                 |              |             |      |        |           |           |           |
|-----------------|--------------|-------------|------|--------|-----------|-----------|-----------|
| MSTRG. 7697. 1  | LINC02795    | XLOC_014569 | 224  | coding | noncoding | noncoding | noncoding |
| MSTRG. 7765. 1  | ODF2L        | XLOC_014584 | 241  | coding | noncoding | noncoding | noncoding |
| MSTRG. 7728. 1  |              | XLOC_014589 | 261  | coding | noncoding | noncoding | noncoding |
| MSTRG. 7735. 1  |              | XLOC_014590 | 244  | coding | noncoding | noncoding | noncoding |
| MSTRG. 7770. 1  | CLCA4        | XLOC_014592 | 248  | coding | noncoding | noncoding | noncoding |
| MSTRG. 7743. 1  |              | XLOC_014597 | 233  | coding | noncoding | noncoding | noncoding |
| MSTRG. 7805. 1  |              | XLOC_014609 | 233  | coding | noncoding | noncoding | noncoding |
| MSTRG. 7887. 1  |              | XLOC_014643 | 256  | coding | noncoding | noncoding | noncoding |
| MSTRG. 8324. 1  | KYAT3        | XLOC_014665 | 230  | coding | noncoding | noncoding | noncoding |
| MSTRG. 8356. 1  |              | XLOC_014693 | 303  | coding | noncoding | noncoding | noncoding |
| MSTRG. 8385. 1  |              | XLOC_014721 | 285  | coding | coding    | noncoding | noncoding |
| MSTRG. 8388. 1  |              | XLOC_014724 | 422  | coding | noncoding | noncoding | noncoding |
| MSTRG. 7985. 1  | LOC105378844 | XLOC_014766 | 304  | coding | noncoding | noncoding | noncoding |
| MSTRG. 8092. 1  |              | XLOC_014868 | 254  | coding | noncoding | noncoding | noncoding |
| MSTRG. 8094. 1  |              | XLOC_014870 | 284  | coding | noncoding | noncoding | noncoding |
| MSTRG. 8215. 5  | CDC7         | XLOC_014877 | 245  | coding | coding    | noncoding | noncoding |
| MSTRG. 8203. 1  |              | XLOC_014886 | 277  | coding | noncoding | noncoding | noncoding |
| MSTRG. 8207. 1  |              | XLOC_014889 | 235  | coding | noncoding | noncoding | noncoding |
| MSTRG. 8249. 1  | TGFBR3       | XLOC_014891 | 231  | coding | noncoding | noncoding | noncoding |
| MSTRG. 8258. 1  | TGFBR3       | XLOC_014900 | 368  | coding | noncoding | noncoding | noncoding |
| MSTRG. 8260. 1  | TGFBR3       | XLOC_014902 | 263  | coding | noncoding | noncoding | noncoding |
| MSTRG. 8474. 1  | EVI5         | XLOC_014951 | 284  | coding | coding    | noncoding | noncoding |
| MSTRG. 8484. 1  | EVI5         | XLOC_014961 | 265  | coding | noncoding | noncoding | noncoding |
| MSTRG. 8440. 1  |              | XLOC_014969 | 385  | coding | noncoding | noncoding | noncoding |
| MSTRG. 8441. 1  |              | XLOC_014970 | 300  | coding | noncoding | noncoding | noncoding |
| MSTRG. 8640. 8  | CCDC18       | XLOC_014978 | 1261 | coding | noncoding | noncoding | noncoding |
| MSTRG. 8662. 6  | DR1          | XLOC_014997 | 4554 | coding | noncoding | noncoding | noncoding |
| NM_001308253. 1 | GCLM         | XLOC_015030 | 4985 | coding | noncoding | coding    | coding    |
| MSTRG. 8528. 1  | ABCA4        | XLOC_015043 | 227  | coding | noncoding | noncoding | noncoding |
| NR_160780. 1    | SLC44A3-AS1  | XLOC_015066 | 3373 | coding | noncoding | noncoding | noncoding |
| XM_017000245. 2 | CNN3         | XLOC_015076 | 4265 | coding | coding    | coding    | coding    |
| MSTRG. 8773. 4  | TLCD4        | XLOC_015087 | 1831 | coding | coding    | coding    | coding    |
| MSTRG. 8773. 17 | TLCD4        | XLOC_015087 | 1202 | coding | coding    | coding    | coding    |
| MSTRG. 8702. 1  |              | XLOC_015101 | 257  | coding | noncoding | noncoding | noncoding |
| MSTRG. 8729. 1  | LINC01787    | XLOC_015110 | 255  | coding | coding    | noncoding | noncoding |
| MSTRG. 8738. 1  | LOC105378866 | XLOC_015116 | 263  | coding | noncoding | noncoding | noncoding |
| MSTRG. 8742. 1  |              | XLOC_015119 | 226  | coding | coding    | noncoding | noncoding |
| MSTRG. 8743. 1  |              | XLOC_015120 | 271  | coding | noncoding | noncoding | noncoding |
| MSTRG. 8789. 6  | PTBP2        | XLOC_015124 | 473  | coding | coding    | noncoding | noncoding |
| MSTRG. 9380. 7  | DPYD         | XLOC_015129 | 4105 | coding | coding    | coding    | coding    |
| MSTRG. 9509. 1  | DPYD         | XLOC_015253 | 262  | coding | noncoding | noncoding | noncoding |
| MSTRG. 8807. 1  |              | XLOC_015293 | 222  | coding | noncoding | noncoding | noncoding |
| MSTRG. 8827. 1  |              | XLOC_015303 | 426  | coding | noncoding | noncoding | noncoding |

|                 |              |             |      |        |           |           |           |
|-----------------|--------------|-------------|------|--------|-----------|-----------|-----------|
| MSTRG. 8834. 1  |              | XLOC_015308 | 286  | coding | noncoding | noncoding | noncoding |
| MSTRG. 8844. 1  | SNX7         | XLOC_015310 | 325  | coding | noncoding | coding    | noncoding |
| MSTRG. 8840. 1  |              | XLOC_015315 | 301  | coding | noncoding | noncoding | noncoding |
| MSTRG. 8851. 1  |              | XLOC_015324 | 227  | coding | noncoding | noncoding | noncoding |
| MSTRG. 8874. 1  |              | XLOC_015327 | 247  | coding | noncoding | noncoding | noncoding |
| MSTRG. 8875. 1  |              | XLOC_015330 | 285  | coding | noncoding | noncoding | noncoding |
| MSTRG. 8878. 1  |              | XLOC_015332 | 430  | coding | noncoding | noncoding | noncoding |
| MSTRG. 8883. 1  |              | XLOC_015335 | 256  | coding | noncoding | noncoding | noncoding |
| MSTRG. 8901. 1  |              | XLOC_015345 | 243  | coding | noncoding | noncoding | noncoding |
| MSTRG. 9005. 4  | CDC14A       | XLOC_015377 | 3916 | coding | coding    | coding    | noncoding |
| MSTRG. 8929. 1  |              | XLOC_015387 | 267  | coding | noncoding | coding    | noncoding |
| MSTRG. 8936. 1  |              | XLOC_015392 | 305  | coding | noncoding | noncoding | noncoding |
| MSTRG. 8947. 1  |              | XLOC_015397 | 306  | coding | noncoding | noncoding | noncoding |
| MSTRG. 8948. 1  |              | XLOC_015398 | 372  | coding | coding    | noncoding | noncoding |
| MSTRG. 9054. 3  | S1PR1        | XLOC_015409 | 2014 | coding | coding    | coding    | noncoding |
| MSTRG. 9059. 1  |              | XLOC_015411 | 290  | coding | noncoding | noncoding | noncoding |
| MSTRG. 9078. 1  | LINC01709    | XLOC_015423 | 263  | coding | noncoding | noncoding | noncoding |
| MSTRG. 9080. 1  |              | XLOC_015424 | 298  | coding | noncoding | noncoding | noncoding |
| XM_017000240. 1 | OLFM3        | XLOC_015425 | 5909 | coding | coding    | coding    | coding    |
| MSTRG. 9087. 1  |              | XLOC_015434 | 311  | coding | noncoding | noncoding | noncoding |
| MSTRG. 9107. 1  |              | XLOC_015438 | 252  | coding | noncoding | noncoding | noncoding |
| MSTRG. 9123. 1  | LOC107985096 | XLOC_015445 | 248  | coding | coding    | coding    | noncoding |
| MSTRG. 9180. 1  |              | XLOC_015464 | 209  | coding | noncoding | noncoding | noncoding |
| MSTRG. 9196. 1  |              | XLOC_015468 | 355  | coding | noncoding | noncoding | noncoding |
| MSTRG. 9223. 1  |              | XLOC_015483 | 298  | coding | noncoding | noncoding | noncoding |
| MSTRG. 9249. 1  |              | XLOC_015488 | 354  | coding | noncoding | noncoding | noncoding |
| MSTRG. 9271. 1  | LINC01677    | XLOC_015499 | 310  | coding | noncoding | noncoding | noncoding |
| MSTRG. 9293. 1  | LOC105378887 | XLOC_015508 | 410  | coding | noncoding | noncoding | noncoding |
| MSTRG. 9309. 1  |              | XLOC_015515 | 352  | coding | noncoding | noncoding | noncoding |
| MSTRG. 9320. 1  |              | XLOC_015521 | 257  | coding | noncoding | noncoding | noncoding |
| MSTRG. 9322. 1  |              | XLOC_015523 | 262  | coding | noncoding | noncoding | noncoding |
| MSTRG. 9637. 1  | MYBPHL       | XLOC_015660 | 283  | coding | noncoding | noncoding | noncoding |
| XR_947695. 3    | LOC105378897 | XLOC_015712 | 2734 | coding | coding    | noncoding | noncoding |
| MSTRG. 9899. 1  |              | XLOC_015768 | 277  | coding | noncoding | noncoding | noncoding |
| MSTRG. 10044. 8 | LOC107985184 | XLOC_015819 | 4773 | coding | coding    | coding    | noncoding |
| XM_017001245. 2 | KCND3        | XLOC_015825 | 7130 | coding | coding    | coding    | coding    |
| MSTRG. 9988. 1  |              | XLOC_015831 | 270  | coding | noncoding | noncoding | noncoding |
| MSTRG. 9996. 1  |              | XLOC_015836 | 462  | coding | coding    | noncoding | noncoding |
| XM_011541628. 2 | ST7L         | XLOC_015848 | 2616 | coding | coding    | noncoding | coding    |
| MSTRG. 10145. 4 | MOV10        | XLOC_015850 | 758  | coding | coding    | noncoding | noncoding |
| MSTRG. 10089. 1 |              | XLOC_015854 | 264  | coding | noncoding | noncoding | noncoding |
| MSTRG. 10092. 1 |              | XLOC_015855 | 221  | coding | noncoding | noncoding | noncoding |
| XR_001738191. 2 | LOC105378911 | XLOC_015858 | 1739 | coding | noncoding | coding    | noncoding |

|                 |              |             |      |        |           |           |           |
|-----------------|--------------|-------------|------|--------|-----------|-----------|-----------|
| MSTRG. 10167. 1 | MAGI3        | XLOC_015882 | 304  | coding | noncoding | noncoding | noncoding |
| MSTRG. 10169. 1 | MAGI3        | XLOC_015884 | 285  | coding | noncoding | noncoding | noncoding |
| NM_001308297. 1 | PTPN22       | XLOC_015896 | 3582 | coding | coding    | coding    | coding    |
| XM_017001004. 1 | PTPN22       | XLOC_015896 | 2483 | coding | coding    | coding    | coding    |
| MSTRG. 10235. 1 | AP4B1-AS1    | XLOC_015897 | 262  | coding | noncoding | noncoding | noncoding |
| MSTRG. 10244. 1 | AP4B1-AS1    | XLOC_015904 | 245  | coding | noncoding | noncoding | noncoding |
| MSTRG. 10186. 1 |              | XLOC_015916 | 219  | coding | noncoding | noncoding | noncoding |
| MSTRG. 10187. 1 |              | XLOC_015918 | 290  | coding | coding    | noncoding | noncoding |
| MSTRG. 10282. 1 | TRIM33       | XLOC_015937 | 318  | coding | noncoding | noncoding | noncoding |
| MSTRG. 10218. 1 |              | XLOC_015951 | 216  | coding | noncoding | noncoding | noncoding |
| MSTRG. 10260. 1 | DENND2C      | XLOC_015955 | 243  | coding | noncoding | noncoding | noncoding |
| MSTRG. 10265. 1 | DENND2C      | XLOC_015958 | 203  | coding | noncoding | noncoding | noncoding |
| NM_001130523. 3 | CSDE1        | XLOC_015962 | 4151 | coding | coding    | coding    | coding    |
| MSTRG. 10294. 1 |              | XLOC_015969 | 287  | coding | noncoding | noncoding | noncoding |
| MSTRG. 10326. 1 | SYCP1        | XLOC_015977 | 270  | coding | noncoding | noncoding | noncoding |
| MSTRG. 10369. 1 |              | XLOC_016010 | 241  | coding | coding    | noncoding | noncoding |
| MSTRG. 10390. 1 |              | XLOC_016033 | 254  | coding | noncoding | noncoding | noncoding |
| MSTRG. 10545. 1 | LOC101929099 | XLOC_016084 | 259  | coding | noncoding | noncoding | noncoding |
| MSTRG. 10577. 1 |              | XLOC_016104 | 249  | coding | coding    | noncoding | noncoding |
| MSTRG. 10613. 1 |              | XLOC_016134 | 225  | coding | noncoding | noncoding | noncoding |
| MSTRG. 10644. 1 |              | XLOC_016203 | 296  | coding | coding    | noncoding | noncoding |
| MSTRG. 10728. 1 | LOC105378937 | XLOC_016215 | 308  | coding | noncoding | noncoding | noncoding |
| MSTRG. 10729. 1 | LOC105378937 | XLOC_016216 | 371  | coding | noncoding | noncoding | noncoding |
| NM_001159353. 2 | REG4         | XLOC_016222 | 2209 | coding | noncoding | noncoding | noncoding |
| XM_017001186. 1 | NBPF7        | XLOC_016224 | 3338 | coding | coding    | coding    | coding    |
| MSTRG. 10849. 1 |              | XLOC_016317 | 289  | coding | noncoding | noncoding | noncoding |
| MSTRG. 10947. 1 |              | XLOC_016395 | 273  | coding | noncoding | noncoding | noncoding |
| MSTRG. 11086. 1 | FAM72D       | XLOC_016465 | 262  | coding | noncoding | noncoding | noncoding |
| MSTRG. 11212. 7 | GPR89A       | XLOC_016493 | 302  | coding | coding    | noncoding | noncoding |
| NM_144698. 5    | ANKRD35      | XLOC_016501 | 3359 | coding | coding    | coding    | coding    |
| MSTRG. 11133. 1 | LIX1L-AS1    | XLOC_016508 | 313  | coding | noncoding | noncoding | noncoding |
| MSTRG. 11169. 1 | LOC112268274 | XLOC_016540 | 457  | coding | noncoding | noncoding | noncoding |
| MSTRG. 11143. 1 |              | XLOC_016548 | 277  | coding | noncoding | noncoding | noncoding |
| MSTRG. 11145. 1 |              | XLOC_016549 | 333  | coding | noncoding | noncoding | noncoding |
| MSTRG. 11228. 2 | NBPF12       | XLOC_016553 | 1573 | coding | coding    | coding    | noncoding |
| MSTRG. 11183. 1 |              | XLOC_016561 | 255  | coding | noncoding | noncoding | noncoding |
| MSTRG. 11187. 1 |              | XLOC_016565 | 209  | coding | noncoding | noncoding | noncoding |
| MSTRG. 11293. 2 | CHD1L        | XLOC_016576 | 1891 | coding | coding    | coding    | coding    |
| MSTRG. 11239. 1 | LINC00624    | XLOC_016580 | 246  | coding | noncoding | noncoding | noncoding |
| MSTRG. 11331. 1 | ACP6         | XLOC_016603 | 299  | coding | coding    | noncoding | noncoding |
| MSTRG. 11267. 1 | LOC102723321 | XLOC_016606 | 244  | coding | coding    | noncoding | noncoding |
| MSTRG. 11264. 1 |              | XLOC_016609 | 228  | coding | noncoding | noncoding | noncoding |
| MSTRG. 12131. 1 | LOC101927468 | XLOC_016629 | 279  | coding | noncoding | noncoding | noncoding |

|                |              |             |      |        |           |           |           |
|----------------|--------------|-------------|------|--------|-----------|-----------|-----------|
| MSTRG.12200.1  | PDE4DIP      | XLOC_016682 | 255  | coding | noncoding | noncoding | noncoding |
| MSTRG.11512.1  | HIST2H2AA3   | XLOC_016757 | 732  | coding | coding    | coding    | noncoding |
| MSTRG.11536.1  | LOC105371427 | XLOC_016769 | 366  | coding | coding    | noncoding | noncoding |
| MSTRG.11528.1  |              | XLOC_016774 | 288  | coding | noncoding | noncoding | noncoding |
| XM_005245513.4 | ANP32E       | XLOC_016775 | 3480 | coding | coding    | coding    | coding    |
| MSTRG.11529.1  |              | XLOC_016777 | 322  | coding | noncoding | noncoding | noncoding |
| MSTRG.11580.1  | ECM1         | XLOC_016786 | 281  | coding | noncoding | noncoding | noncoding |
| MSTRG.11573.1  |              | XLOC_016787 | 294  | coding | noncoding | noncoding | noncoding |
| MSTRG.11604.1  | ADAMTSL4-AS1 | XLOC_016799 | 276  | coding | noncoding | noncoding | noncoding |
| MSTRG.11658.1  | ANXA9        | XLOC_016830 | 267  | coding | noncoding | noncoding | noncoding |
| MSTRG.11659.1  | ANXA9        | XLOC_016831 | 213  | coding | coding    | noncoding | noncoding |
| MSTRG.11679.1  | LYSMD1       | XLOC_016845 | 437  | coding | noncoding | noncoding | noncoding |
| NM_005997.3    | VPS72        | XLOC_016846 | 1511 | coding | coding    | coding    | coding    |
| XM_017001486.1 | PI4KB        | XLOC_016851 | 4307 | coding | coding    | coding    | coding    |
| NM_001258288.2 | SELENBP1     | XLOC_016853 | 1536 | coding | coding    | coding    | coding    |
| MSTRG.11694.1  |              | XLOC_016854 | 256  | coding | noncoding | noncoding | noncoding |
| XM_017000746.1 | POGZ         | XLOC_016856 | 6526 | coding | coding    | coding    | coding    |
| MSTRG.11707.1  | CGN          | XLOC_016860 | 231  | coding | noncoding | noncoding | noncoding |
| MSTRG.11718.1  | TUFT1        | XLOC_016867 | 225  | coding | noncoding | noncoding | noncoding |
| MSTRG.11708.1  |              | XLOC_016870 | 439  | coding | noncoding | noncoding | noncoding |
| MSTRG.11729.1  |              | XLOC_016872 | 279  | coding | noncoding | noncoding | noncoding |
| MSTRG.11794.1  | LOC105371441 | XLOC_016902 | 259  | coding | noncoding | noncoding | noncoding |
| NM_007113.3    | TCHH         | XLOC_016913 | 6995 | coding | coding    | coding    | coding    |
| MSTRG.11826.1  |              | XLOC_016922 | 276  | coding | noncoding | noncoding | noncoding |
| MSTRG.11828.1  |              | XLOC_016923 | 238  | coding | coding    | noncoding | noncoding |
| MSTRG.11864.1  |              | XLOC_016953 | 275  | coding | noncoding | noncoding | noncoding |
| MSTRG.11906.1  |              | XLOC_016983 | 261  | coding | coding    | coding    | noncoding |
| MSTRG.11907.1  |              | XLOC_016984 | 293  | coding | noncoding | noncoding | noncoding |
| MSTRG.11929.1  | NPR1         | XLOC_016998 | 307  | coding | noncoding | noncoding | noncoding |
| MSTRG.11969.1  | GATAD2B      | XLOC_017003 | 280  | coding | noncoding | noncoding | noncoding |
| MSTRG.11971.1  | GATAD2B      | XLOC_017005 | 222  | coding | noncoding | noncoding | noncoding |
| XM_011510220.2 | DENND4B      | XLOC_017011 | 5508 | coding | coding    | coding    | coding    |
| MSTRG.11994.1  | RAB13        | XLOC_017024 | 269  | coding | noncoding | noncoding | noncoding |
| MSTRG.12008.18 | UBAP2L       | XLOC_017030 | 3802 | coding | coding    | coding    | coding    |
| MSTRG.11960.1  |              | XLOC_017034 | 278  | coding | noncoding | noncoding | noncoding |
| MSTRG.12038.5  | SHE          | XLOC_017036 | 5374 | coding | coding    | coding    | coding    |
| MSTRG.12050.1  | TDRD10       | XLOC_017039 | 225  | coding | noncoding | noncoding | noncoding |
| NM_001025107.3 | ADAR         | XLOC_017043 | 6532 | coding | coding    | coding    | coding    |
| MSTRG.12057.1  | ADAR         | XLOC_017045 | 290  | coding | noncoding | noncoding | noncoding |
| MSTRG.12004.1  |              | XLOC_017050 | 222  | coding | noncoding | noncoding | noncoding |
| MSTRG.12036.1  |              | XLOC_017061 | 236  | coding | noncoding | noncoding | noncoding |
| MSTRG.12073.1  | PMVK         | XLOC_017064 | 272  | coding | noncoding | noncoding | noncoding |
| XM_011509189.2 | DCST2        | XLOC_017072 | 2285 | coding | coding    | coding    | coding    |

|                  |              |             |      |        |           |           |           |
|------------------|--------------|-------------|------|--------|-----------|-----------|-----------|
| MSTRG. 12089. 1  |              | XLOC_017080 | 270  | coding | noncoding | noncoding | noncoding |
| MSTRG. 12090. 1  |              | XLOC_017081 | 256  | coding | noncoding | noncoding | noncoding |
| MSTRG. 12092. 1  |              | XLOC_017085 | 250  | coding | noncoding | noncoding | noncoding |
| MSTRG. 12497. 1  | ASH1L        | XLOC_017108 | 254  | coding | noncoding | noncoding | noncoding |
| MSTRG. 12510. 1  |              | XLOC_017119 | 203  | coding | noncoding | noncoding | noncoding |
| MSTRG. 12514. 1  |              | XLOC_017121 | 270  | coding | noncoding | noncoding | noncoding |
| MSTRG. 12520. 17 | DAP3         | XLOC_017126 | 1443 | coding | coding    | noncoding | noncoding |
| MSTRG. 12526. 1  | GON4L        | XLOC_017132 | 256  | coding | noncoding | noncoding | noncoding |
| NM_001256820. 2  | RIT1         | XLOC_017134 | 3241 | coding | coding    | coding    | coding    |
| MSTRG. 12350. 1  |              | XLOC_017139 | 300  | coding | noncoding | noncoding | noncoding |
| MSTRG. 12355. 1  | ARHGEF2      | XLOC_017142 | 232  | coding | noncoding | noncoding | noncoding |
| MSTRG. 12343. 1  | LOC105371729 | XLOC_017149 | 275  | coding | noncoding | noncoding | noncoding |
| MSTRG. 12381. 1  | CCT3         | XLOC_017176 | 313  | coding | noncoding | coding    | noncoding |
| XM_005245170. 3  | MEF2D        | XLOC_017183 | 5986 | coding | coding    | coding    | coding    |
| MSTRG. 12396. 1  | MEF2D        | XLOC_017184 | 281  | coding | noncoding | noncoding | noncoding |
| MSTRG. 12397. 1  | MEF2D        | XLOC_017185 | 298  | coding | noncoding | noncoding | noncoding |
| XR_922175. 3     | LOC105371453 | XLOC_017197 | 9468 | coding | coding    | coding    | noncoding |
| XM_005245518. 4  | ISG20L2      | XLOC_017204 | 2238 | coding | noncoding | coding    | coding    |
| NM_004494. 3     | HDGF         | XLOC_017206 | 2309 | coding | coding    | coding    | coding    |
| MSTRG. 12577. 1  | ARHGEF11     | XLOC_017226 | 289  | coding | noncoding | noncoding | noncoding |
| MSTRG. 12555. 1  |              | XLOC_017246 | 321  | coding | noncoding | noncoding | noncoding |
| MSTRG. 12644. 1  |              | XLOC_017255 | 498  | coding | noncoding | noncoding | noncoding |
| XM_011509125. 1  | FCRL1        | XLOC_017258 | 5222 | coding | coding    | coding    | coding    |
| MSTRG. 12605. 1  |              | XLOC_017276 | 259  | coding | noncoding | noncoding | noncoding |
| NM_001004477. 1  | OR10X1       | XLOC_017293 | 981  | coding | coding    | coding    | coding    |
| MSTRG. 12666. 1  | SPTA1        | XLOC_017296 | 271  | coding | noncoding | noncoding | noncoding |
| NM_001005327. 2  | OR6K3        | XLOC_017299 | 948  | coding | coding    | coding    | coding    |
| MSTRG. 12669. 1  |              | XLOC_017311 | 202  | coding | noncoding | noncoding | noncoding |
| MSTRG. 12827. 10 | PYHIN1       | XLOC_017312 | 1531 | coding | coding    | coding    | coding    |
| MSTRG. 12827. 12 | PYHIN1       | XLOC_017312 | 4972 | coding | coding    | noncoding | noncoding |
| MSTRG. 12827. 8  | IFI16        | XLOC_017312 | 5414 | coding | coding    | coding    | noncoding |
| MSTRG. 12827. 11 | IFI16        | XLOC_017312 | 5246 | coding | coding    | coding    | noncoding |
| MSTRG. 12827. 9  | IFI16        | XLOC_017312 | 6205 | coding | coding    | coding    | noncoding |
| MSTRG. 12827. 7  | LOC105371461 | XLOC_017312 | 8458 | coding | coding    | coding    | noncoding |
| MSTRG. 12704. 1  |              | XLOC_017319 | 229  | coding | noncoding | noncoding | noncoding |
| MSTRG. 12733. 1  |              | XLOC_017332 | 295  | coding | noncoding | noncoding | noncoding |
| MSTRG. 12775. 8  | LOC105371464 | XLOC_017343 | 2415 | coding | coding    | noncoding | noncoding |
| MSTRG. 12761. 1  | SLAMF9       | XLOC_017362 | 257  | coding | noncoding | noncoding | noncoding |
| MSTRG. 12822. 1  | ATP1A2       | XLOC_017370 | 271  | coding | noncoding | noncoding | noncoding |
| MSTRG. 12900. 1  | LOC107985219 | XLOC_017385 | 251  | coding | noncoding | noncoding | noncoding |
| NM_001184715. 2  | SLAMF6       | XLOC_017402 | 2583 | coding | noncoding | coding    | coding    |
| NM_003874. 4     | CD84         | XLOC_017414 | 8204 | coding | noncoding | coding    | coding    |
| NM_001184879. 2  | CD84         | XLOC_017414 | 8255 | coding | noncoding | coding    | coding    |

|                  |              |             |      |        |           |           |           |
|------------------|--------------|-------------|------|--------|-----------|-----------|-----------|
| MSTRG. 12866. 1  |              | XLOC_017416 | 351  | coding | noncoding | noncoding | noncoding |
| XM_005245625. 1  | CD48         | XLOC_017432 | 830  | coding | coding    | coding    | coding    |
| XM_017002867. 2  | CD48         | XLOC_017432 | 808  | coding | coding    | noncoding | coding    |
| MSTRG. 12918. 1  | LOC105371470 | XLOC_017443 | 278  | coding | noncoding | noncoding | noncoding |
| MSTRG. 12970. 1  | LOC101928372 | XLOC_017450 | 200  | coding | noncoding | noncoding | noncoding |
| MSTRG. 13069. 1  | PFDN2        | XLOC_017464 | 228  | coding | noncoding | noncoding | noncoding |
| NM_001199873. 1  | B4GALT3      | XLOC_017473 | 2415 | coding | coding    | coding    | coding    |
| XR_001737549. 2  | ADAMTS4      | XLOC_017473 | 5866 | coding | coding    | coding    | coding    |
| MSTRG. 12999. 1  |              | XLOC_017482 | 272  | coding | noncoding | noncoding | noncoding |
| MSTRG. 13003. 1  | PCP4L1       | XLOC_017483 | 275  | coding | noncoding | noncoding | noncoding |
| MSTRG. 13005. 1  | PCP4L1       | XLOC_017484 | 251  | coding | noncoding | noncoding | noncoding |
| XM_017001321. 2  | MPZ          | XLOC_017487 | 1457 | coding | coding    | coding    | coding    |
| MSTRG. 13211. 14 | FCGR2A       | XLOC_017527 | 3347 | coding | coding    | noncoding | noncoding |
| MSTRG. 13211. 18 | FCGR3B       | XLOC_017530 | 2995 | coding | coding    | coding    | coding    |
| MSTRG. 13094. 4  | FCRLA        | XLOC_017536 | 831  | coding | coding    | noncoding | noncoding |
| MSTRG. 13122. 1  |              | XLOC_017578 | 241  | coding | noncoding | noncoding | noncoding |
| MSTRG. 13126. 1  |              | XLOC_017580 | 243  | coding | coding    | noncoding | noncoding |
| MSTRG. 13247. 1  | DDR2         | XLOC_017595 | 275  | coding | noncoding | noncoding | noncoding |
| MSTRG. 13257. 1  | DDR2         | XLOC_017602 | 391  | coding | noncoding | noncoding | noncoding |
| MSTRG. 13307. 1  |              | XLOC_017641 | 305  | coding | noncoding | noncoding | noncoding |
| MSTRG. 13308. 1  |              | XLOC_017642 | 281  | coding | noncoding | noncoding | noncoding |
| MSTRG. 13328. 1  |              | XLOC_017652 | 281  | coding | noncoding | noncoding | noncoding |
| MSTRG. 13339. 1  |              | XLOC_017659 | 240  | coding | noncoding | noncoding | noncoding |
| MSTRG. 13345. 1  |              | XLOC_017662 | 244  | coding | noncoding | noncoding | noncoding |
| NM_177398. 4     | LMX1A        | XLOC_017678 | 3545 | coding | coding    | coding    | coding    |
| MSTRG. 13453. 1  | LRRC52-AS1   | XLOC_017689 | 229  | coding | noncoding | noncoding | noncoding |
| MSTRG. 13479. 1  | TMCO1        | XLOC_017701 | 478  | coding | noncoding | noncoding | noncoding |
| MSTRG. 13480. 1  | TMCO1        | XLOC_017702 | 275  | coding | noncoding | noncoding | noncoding |
| MSTRG. 13489. 1  |              | XLOC_017712 | 277  | coding | noncoding | noncoding | noncoding |
| MSTRG. 13490. 1  |              | XLOC_017713 | 270  | coding | coding    | noncoding | noncoding |
| MSTRG. 13498. 1  |              | XLOC_017726 | 230  | coding | coding    | noncoding | noncoding |
| MSTRG. 13570. 6  | POGK         | XLOC_017739 | 3591 | coding | coding    | coding    | coding    |
| MSTRG. 13566. 1  |              | XLOC_017751 | 235  | coding | noncoding | noncoding | noncoding |
| MSTRG. 13576. 1  |              | XLOC_017754 | 301  | coding | noncoding | noncoding | noncoding |
| MSTRG. 13598. 1  |              | XLOC_017787 | 276  | coding | noncoding | noncoding | noncoding |
| MSTRG. 13750. 1  | ADCY10       | XLOC_017805 | 321  | coding | noncoding | noncoding | noncoding |
| MSTRG. 13652. 1  | GPR161       | XLOC_017817 | 260  | coding | noncoding | noncoding | noncoding |
| MSTRG. 13653. 1  | GPR161       | XLOC_017818 | 278  | coding | noncoding | noncoding | noncoding |
| MSTRG. 13786. 1  |              | XLOC_017864 | 260  | coding | noncoding | noncoding | noncoding |
| MSTRG. 13798. 1  |              | XLOC_017866 | 226  | coding | coding    | noncoding | noncoding |
| MSTRG. 13812. 1  |              | XLOC_017872 | 277  | coding | noncoding | noncoding | noncoding |
| NM_000130. 4     | F5           | XLOC_017902 | 9179 | coding | coding    | coding    | coding    |
| MSTRG. 13931. 1  |              | XLOC_017933 | 263  | coding | noncoding | noncoding | noncoding |

|                |              |             |      |        |           |           |           |
|----------------|--------------|-------------|------|--------|-----------|-----------|-----------|
| NM_001204514.1 | KIFAP3       | XLOC_017934 | 3161 | coding | coding    | coding    | coding    |
| MSTRG.13941.1  | LINC01681    | XLOC_017956 | 294  | coding | noncoding | noncoding | noncoding |
| MSTRG.14048.1  | LOC105371611 | XLOC_017981 | 216  | coding | noncoding | noncoding | noncoding |
| MSTRG.14055.1  |              | XLOC_017994 | 403  | coding | noncoding | noncoding | noncoding |
| MSTRG.14061.1  |              | XLOC_017997 | 270  | coding | noncoding | noncoding | noncoding |
| MSTRG.14149.1  |              | XLOC_018027 | 264  | coding | noncoding | noncoding | noncoding |
| MSTRG.14152.1  |              | XLOC_018029 | 274  | coding | noncoding | noncoding | noncoding |
| MSTRG.14170.1  |              | XLOC_018038 | 380  | coding | noncoding | noncoding | noncoding |
| MSTRG.14349.1  |              | XLOC_018050 | 267  | coding | noncoding | noncoding | noncoding |
| XR_001737395.2 | TNFSF4       | XLOC_018052 | 4369 | coding | noncoding | noncoding | noncoding |
| MSTRG.14444.1  | TNFSF4       | XLOC_018083 | 271  | coding | noncoding | noncoding | noncoding |
| XM_011509470.2 | ANKRD45      | XLOC_018091 | 2122 | coding | coding    | coding    | coding    |
| MSTRG.14272.5  | DARS2        | XLOC_018100 | 1599 | coding | coding    | coding    | noncoding |
| MSTRG.14237.1  |              | XLOC_018136 | 576  | coding | noncoding | noncoding | noncoding |
| MSTRG.14671.12 | RABGAP1L     | XLOC_018138 | 2123 | coding | coding    | noncoding | noncoding |
| MSTRG.14303.1  | TNN          | XLOC_018152 | 320  | coding | coding    | noncoding | noncoding |
| NM_001162894.2 | KIAA0040     | XLOC_018153 | 4539 | coding | noncoding | coding    | coding    |
| MSTRG.14482.1  |              | XLOC_018253 | 276  | coding | noncoding | noncoding | noncoding |
| MSTRG.14513.1  | PAPPA2       | XLOC_018266 | 228  | coding | noncoding | noncoding | noncoding |
| NM_001364856.1 | ASTN1        | XLOC_018271 | 7165 | coding | coding    | coding    | coding    |
| XR_922299.3    | LOC105371625 | XLOC_018284 | 1332 | coding | noncoding | noncoding | noncoding |
| MSTRG.14550.1  |              | XLOC_018294 | 206  | coding | noncoding | noncoding | noncoding |
| MSTRG.14608.1  | RASAL2       | XLOC_018321 | 270  | coding | noncoding | noncoding | noncoding |
| MSTRG.14644.1  |              | XLOC_018347 | 371  | coding | noncoding | noncoding | noncoding |
| MSTRG.14794.7  | RALGPS2      | XLOC_018359 | 5109 | coding | noncoding | noncoding | noncoding |
| MSTRG.14661.1  |              | XLOC_018366 | 477  | coding | noncoding | noncoding | noncoding |
| MSTRG.14835.1  | ABL2         | XLOC_018373 | 276  | coding | noncoding | noncoding | noncoding |
| MSTRG.14840.1  | AXDND1       | XLOC_018377 | 270  | coding | noncoding | noncoding | noncoding |
| MSTRG.14842.1  | AXDND1       | XLOC_018378 | 268  | coding | noncoding | noncoding | noncoding |
| MSTRG.14843.1  | AXDND1       | XLOC_018379 | 306  | coding | noncoding | noncoding | noncoding |
| MSTRG.14845.1  | AXDND1       | XLOC_018381 | 262  | coding | noncoding | noncoding | noncoding |
| MSTRG.14850.1  | NPHS2        | XLOC_018385 | 263  | coding | noncoding | noncoding | noncoding |
| MSTRG.14968.1  | LOC101928933 | XLOC_018400 | 295  | coding | noncoding | noncoding | noncoding |
| MSTRG.15040.1  | ACBD6        | XLOC_018429 | 405  | coding | noncoding | noncoding | noncoding |
| MSTRG.14952.1  |              | XLOC_018434 | 243  | coding | noncoding | noncoding | noncoding |
| MSTRG.15101.1  |              | XLOC_018507 | 238  | coding | noncoding | noncoding | noncoding |
| MSTRG.15102.1  |              | XLOC_018508 | 278  | coding | noncoding | noncoding | noncoding |
| MSTRG.15146.1  |              | XLOC_018533 | 225  | coding | noncoding | noncoding | noncoding |
| MSTRG.15176.1  | RGS8         | XLOC_018552 | 218  | coding | noncoding | noncoding | noncoding |
| MSTRG.15189.1  | RGS8         | XLOC_018558 | 254  | coding | noncoding | noncoding | noncoding |
| MSTRG.15241.1  |              | XLOC_018565 | 252  | coding | noncoding | noncoding | noncoding |
| MSTRG.15272.1  | LAMC2        | XLOC_018584 | 281  | coding | noncoding | noncoding | noncoding |
| MSTRG.15278.1  | NMNAT2       | XLOC_018589 | 252  | coding | noncoding | noncoding | noncoding |

|                  |              |             |      |        |           |           |           |
|------------------|--------------|-------------|------|--------|-----------|-----------|-----------|
| MSTRG. 15350. 1  |              | XLOC_018631 | 259  | coding | noncoding | noncoding | noncoding |
| MSTRG. 15347. 1  |              | XLOC_018634 | 278  | coding | noncoding | noncoding | noncoding |
| NR_135118. 1     | EDEM3        | XLOC_018645 | 6699 | coding | coding    | coding    | coding    |
| XM_005245499. 2  | EDEM3        | XLOC_018645 | 6623 | coding | coding    | coding    | coding    |
| MSTRG. 15476. 4  | NIBAN1       | XLOC_018665 | 3678 | coding | noncoding | coding    | coding    |
| MSTRG. 15417. 1  | LINC01633    | XLOC_018703 | 467  | coding | coding    | noncoding | noncoding |
| MSTRG. 15419. 1  |              | XLOC_018706 | 221  | coding | noncoding | noncoding | noncoding |
| MSTRG. 15585. 10 | SWT1         | XLOC_018711 | 3106 | coding | coding    | noncoding | noncoding |
| MSTRG. 15585. 13 | SWT1         | XLOC_018711 | 1808 | coding | noncoding | noncoding | noncoding |
| MSTRG. 15538. 1  | LOC107985239 | XLOC_018751 | 299  | coding | noncoding | noncoding | noncoding |
| MSTRG. 15536. 1  |              | XLOC_018773 | 263  | coding | noncoding | noncoding | noncoding |
| MSTRG. 15668. 1  | ODR4         | XLOC_018782 | 2402 | coding | coding    | noncoding | noncoding |
| MSTRG. 15639. 1  |              | XLOC_018812 | 297  | coding | noncoding | noncoding | noncoding |
| MSTRG. 15646. 1  |              | XLOC_018819 | 268  | coding | noncoding | noncoding | noncoding |
| MSTRG. 15657. 1  |              | XLOC_018823 | 254  | coding | noncoding | noncoding | noncoding |
| MSTRG. 15694. 1  |              | XLOC_018851 | 214  | coding | noncoding | noncoding | noncoding |
| MSTRG. 15710. 1  |              | XLOC_018861 | 306  | coding | noncoding | noncoding | noncoding |
| MSTRG. 15711. 1  |              | XLOC_018862 | 260  | coding | noncoding | noncoding | noncoding |
| MSTRG. 15714. 1  |              | XLOC_018864 | 236  | coding | noncoding | noncoding | noncoding |
| MSTRG. 15740. 1  |              | XLOC_018877 | 300  | coding | coding    | noncoding | noncoding |
| MSTRG. 15812. 1  |              | XLOC_018893 | 279  | coding | noncoding | noncoding | noncoding |
| MSTRG. 15824. 1  |              | XLOC_018899 | 201  | coding | noncoding | noncoding | noncoding |
| MSTRG. 15865. 1  |              | XLOC_018918 | 465  | coding | noncoding | noncoding | noncoding |
| MSTRG. 15875. 1  |              | XLOC_018925 | 301  | coding | noncoding | noncoding | noncoding |
| MSTRG. 15944. 1  |              | XLOC_018947 | 622  | coding | coding    | noncoding | noncoding |
| MSTRG. 15959. 1  |              | XLOC_018950 | 218  | coding | noncoding | noncoding | noncoding |
| MSTRG. 16868. 1  | LOC107985242 | XLOC_019111 | 278  | coding | noncoding | noncoding | noncoding |
| MSTRG. 16094. 1  |              | XLOC_019113 | 278  | coding | noncoding | noncoding | noncoding |
| MSTRG. 16127. 1  |              | XLOC_019130 | 433  | coding | noncoding | noncoding | noncoding |
| MSTRG. 16140. 1  |              | XLOC_019136 | 464  | coding | noncoding | noncoding | noncoding |
| XR_922393. 2     | LOC105371672 | XLOC_019145 | 5864 | coding | noncoding | noncoding | noncoding |
| MSTRG. 16153. 1  |              | XLOC_019147 | 300  | coding | noncoding | noncoding | noncoding |
| MSTRG. 16177. 1  |              | XLOC_019148 | 299  | coding | noncoding | noncoding | noncoding |
| MSTRG. 16181. 1  |              | XLOC_019151 | 316  | coding | noncoding | noncoding | noncoding |
| XM_017001179. 2  | KCNT2        | XLOC_019159 | 6550 | coding | coding    | coding    | coding    |
| MSTRG. 16206. 1  | KCNT2        | XLOC_019164 | 258  | coding | noncoding | noncoding | noncoding |
| MSTRG. 16222. 1  | CFHR3        | XLOC_019170 | 442  | coding | noncoding | noncoding | noncoding |
| MSTRG. 16211. 1  |              | XLOC_019171 | 315  | coding | noncoding | noncoding | noncoding |
| XR_922396. 2     | LOC105371675 | XLOC_019172 | 2594 | coding | noncoding | noncoding | noncoding |
| MSTRG. 16224. 1  | F13B         | XLOC_019175 | 434  | coding | noncoding | noncoding | noncoding |
| MSTRG. 16444. 1  | CRB1         | XLOC_019207 | 269  | coding | noncoding | noncoding | noncoding |
| MSTRG. 16453. 1  |              | XLOC_019213 | 314  | coding | noncoding | noncoding | noncoding |
| MSTRG. 16470. 1  | DENND1B      | XLOC_019229 | 225  | coding | noncoding | noncoding | noncoding |

|                |              |             |       |        |           |           |           |
|----------------|--------------|-------------|-------|--------|-----------|-----------|-----------|
| MSTRG.16243.1  |              | XLOC_019243 | 294   | coding | noncoding | noncoding | noncoding |
| MSTRG.16258.1  |              | XLOC_019251 | 279   | coding | noncoding | noncoding | noncoding |
| MSTRG.16260.1  |              | XLOC_019253 | 263   | coding | noncoding | noncoding | noncoding |
| MSTRG.16281.7  | NEK7         | XLOC_019256 | 3933  | coding | noncoding | noncoding | noncoding |
| MSTRG.16393.10 | PTPRC        | XLOC_019264 | 1681  | coding | coding    | noncoding | noncoding |
| MSTRG.16355.1  |              | XLOC_019284 | 276   | coding | noncoding | noncoding | noncoding |
| MSTRG.16502.1  |              | XLOC_019295 | 283   | coding | noncoding | noncoding | noncoding |
| MSTRG.16405.1  |              | XLOC_019300 | 298   | coding | noncoding | noncoding | noncoding |
| XM_011510236.1 | KIF14        | XLOC_019302 | 7160  | coding | coding    | coding    | coding    |
| MSTRG.16481.1  |              | XLOC_019304 | 260   | coding | noncoding | noncoding | noncoding |
| MSTRG.16539.1  | CAMSAP2      | XLOC_019323 | 252   | coding | noncoding | noncoding | noncoding |
| XM_017000732.1 | KIF21B       | XLOC_019334 | 4375  | coding | coding    | coding    | coding    |
| NM_000069.3    | CACNA1S      | XLOC_019340 | 6028  | coding | coding    | coding    | coding    |
| NM_003281.4    | TNNI1        | XLOC_019358 | 6110  | coding | coding    | coding    | coding    |
| MSTRG.16623.1  | ARL8A        | XLOC_019398 | 269   | coding | noncoding | noncoding | noncoding |
| MSTRG.16879.1  | KDM5B        | XLOC_019432 | 201   | coding | noncoding | noncoding | noncoding |
| MSTRG.16888.1  | KLHL12       | XLOC_019439 | 276   | coding | noncoding | noncoding | noncoding |
| MSTRG.16899.1  | LOC100506747 | XLOC_019447 | 220   | coding | noncoding | noncoding | noncoding |
| MSTRG.16922.1  |              | XLOC_019462 | 252   | coding | noncoding | noncoding | noncoding |
| MSTRG.17000.1  | LOC102723529 | XLOC_019466 | 759   | coding | noncoding | noncoding | noncoding |
| MSTRG.17001.1  |              | XLOC_019475 | 241   | coding | noncoding | noncoding | noncoding |
| MSTRG.17008.3  | ATP2B4       | XLOC_019480 | 6385  | coding | coding    | coding    | coding    |
| MSTRG.17066.19 | ZC3H11A      | XLOC_019483 | 4774  | coding | coding    | coding    | coding    |
| MSTRG.17022.1  |              | XLOC_019489 | 301   | coding | noncoding | noncoding | noncoding |
| MSTRG.17024.1  |              | XLOC_019490 | 277   | coding | noncoding | noncoding | noncoding |
| NR_027902.1    | LINC00303    | XLOC_019492 | 1514  | coding | noncoding | noncoding | noncoding |
| MSTRG.17037.1  | LINC00303    | XLOC_019493 | 252   | coding | noncoding | noncoding | noncoding |
| MSTRG.17034.1  |              | XLOC_019494 | 316   | coding | noncoding | noncoding | noncoding |
| XM_011509301.3 | PLEKHA6      | XLOC_019514 | 11723 | coding | coding    | coding    | coding    |
| MSTRG.17076.1  | PLEKHA6      | XLOC_019515 | 258   | coding | noncoding | noncoding | noncoding |
| NM_002646.3    | PIK3C2B      | XLOC_019524 | 7606  | coding | coding    | coding    | coding    |
| XM_017001474.1 | PIK3C2B      | XLOC_019524 | 7794  | coding | coding    | coding    | coding    |
| XM_017001473.1 | PIK3C2B      | XLOC_019524 | 8591  | coding | coding    | coding    | coding    |
| MSTRG.17101.1  |              | XLOC_019545 | 256   | coding | noncoding | noncoding | noncoding |
| MSTRG.17115.1  | NFASC        | XLOC_019549 | 348   | coding | noncoding | noncoding | noncoding |
| MSTRG.17122.1  | NFASC        | XLOC_019553 | 206   | coding | noncoding | noncoding | noncoding |
| MSTRG.17176.1  |              | XLOC_019574 | 306   | coding | noncoding | noncoding | noncoding |
| MSTRG.17210.1  | LEMD1        | XLOC_019586 | 285   | coding | noncoding | noncoding | noncoding |
| MSTRG.17217.1  | LEMD1-DT     | XLOC_019591 | 276   | coding | noncoding | noncoding | noncoding |
| MSTRG.17226.1  |              | XLOC_019605 | 622   | coding | noncoding | noncoding | noncoding |
| XM_005245453.1 | NUCKS1       | XLOC_019608 | 6063  | coding | noncoding | coding    | coding    |
| MSTRG.17258.1  | NUCKS1       | XLOC_019609 | 201   | coding | noncoding | noncoding | noncoding |
| MSTRG.17253.1  |              | XLOC_019613 | 360   | coding | noncoding | noncoding | noncoding |

|                |              |             |       |        |           |           |           |
|----------------|--------------|-------------|-------|--------|-----------|-----------|-----------|
| MSTRG.17270.1  | LOC284581    | XLOC_019621 | 280   | coding | noncoding | noncoding | noncoding |
| MSTRG.17271.1  | LOC284581    | XLOC_019622 | 225   | coding | noncoding | noncoding | noncoding |
| NM_052934.4    | SLC26A9      | XLOC_019624 | 4791  | coding | coding    | coding    | coding    |
| MSTRG.17288.1  | RAB7B        | XLOC_019628 | 226   | coding | noncoding | noncoding | noncoding |
| MSTRG.17310.2  | IKBKE        | XLOC_019640 | 345   | coding | coding    | noncoding | noncoding |
| MSTRG.17341.5  | EIF2D        | XLOC_019651 | 10751 | coding | coding    | coding    | coding    |
| MSTRG.17349.1  | IL19         | XLOC_019669 | 236   | coding | noncoding | noncoding | noncoding |
| MSTRG.17418.1  |              | XLOC_019696 | 241   | coding | noncoding | noncoding | noncoding |
| MSTRG.17817.14 | CR1          | XLOC_019714 | 6268  | coding | coding    | noncoding | noncoding |
| MSTRG.17516.1  | LOC105372889 | XLOC_019755 | 289   | coding | noncoding | noncoding | noncoding |
| MSTRG.17508.1  |              | XLOC_019761 | 294   | coding | noncoding | noncoding | noncoding |
| MSTRG.17622.1  | LOC107985255 | XLOC_019784 | 263   | coding | noncoding | noncoding | noncoding |
| MSTRG.17602.1  |              | XLOC_019791 | 230   | coding | noncoding | noncoding | noncoding |
| MSTRG.17687.7  | C1orf74      | XLOC_019812 | 8990  | coding | coding    | coding    | noncoding |
| NM_006147.4    | IRF6         | XLOC_019814 | 4478  | coding | coding    | coding    | coding    |
| MSTRG.17652.1  | SYT14        | XLOC_019820 | 334   | coding | coding    | noncoding | noncoding |
| MSTRG.17653.1  | SYT14        | XLOC_019821 | 292   | coding | noncoding | noncoding | noncoding |
| MSTRG.17746.1  | KCNH1        | XLOC_019850 | 266   | coding | noncoding | noncoding | noncoding |
| MSTRG.17707.1  |              | XLOC_019852 | 264   | coding | noncoding | noncoding | noncoding |
| MSTRG.17794.10 | RCOR3        | XLOC_019853 | 3262  | coding | coding    | coding    | noncoding |
| MSTRG.17956.1  | LPGAT1-AS1   | XLOC_019886 | 281   | coding | noncoding | noncoding | noncoding |
| MSTRG.17960.1  |              | XLOC_019890 | 262   | coding | noncoding | noncoding | noncoding |
| MSTRG.17896.1  |              | XLOC_019903 | 294   | coding | noncoding | noncoding | noncoding |
| MSTRG.17893.1  |              | XLOC_019904 | 241   | coding | noncoding | noncoding | noncoding |
| MSTRG.18007.8  | PPP2R5A      | XLOC_019911 | 1982  | coding | coding    | coding    | coding    |
| MSTRG.18007.12 | PPP2R5A      | XLOC_019911 | 637   | coding | coding    | noncoding | noncoding |
| MSTRG.18013.1  | PACC1        | XLOC_019913 | 224   | coding | noncoding | noncoding | noncoding |
| MSTRG.17926.1  | ATF3         | XLOC_019937 | 252   | coding | noncoding | noncoding | noncoding |
| XR_921869.2    | BATF3        | XLOC_019944 | 1232  | coding | noncoding | coding    | noncoding |
| MSTRG.18047.1  |              | XLOC_019985 | 260   | coding | noncoding | noncoding | noncoding |
| MSTRG.18154.1  | PTPN14       | XLOC_019992 | 275   | coding | noncoding | noncoding | noncoding |
| MSTRG.18165.1  |              | XLOC_020007 | 248   | coding | noncoding | noncoding | noncoding |
| MSTRG.18163.1  | KCNK2        | XLOC_020011 | 292   | coding | noncoding | noncoding | noncoding |
| MSTRG.18137.1  |              | XLOC_020016 | 271   | coding | coding    | noncoding | noncoding |
| MSTRG.18134.1  |              | XLOC_020018 | 375   | coding | noncoding | noncoding | noncoding |
| MSTRG.18118.1  |              | XLOC_020019 | 617   | coding | coding    | noncoding | noncoding |
| XM_017000621.2 | ESRRG        | XLOC_020035 | 9490  | coding | coding    | coding    | coding    |
| MSTRG.18224.1  | ESRRG        | XLOC_020038 | 346   | coding | noncoding | noncoding | noncoding |
| MSTRG.18215.1  |              | XLOC_020051 | 238   | coding | noncoding | noncoding | noncoding |
| MSTRG.18256.1  | SPATA17      | XLOC_020073 | 280   | coding | noncoding | noncoding | noncoding |
| MSTRG.18257.1  | SPATA17      | XLOC_020074 | 275   | coding | noncoding | noncoding | noncoding |
| MSTRG.18263.1  | SPATA17      | XLOC_020078 | 222   | coding | noncoding | noncoding | noncoding |
| MSTRG.18285.1  | TGFB2        | XLOC_020090 | 335   | coding | coding    | noncoding | noncoding |

|                 |              |             |       |        |           |           |           |
|-----------------|--------------|-------------|-------|--------|-----------|-----------|-----------|
| MSTRG. 18448. 1 |              | XLOC_020105 | 315   | coding | noncoding | noncoding | noncoding |
| MSTRG. 18452. 1 |              | XLOC_020107 | 270   | coding | noncoding | noncoding | noncoding |
| MSTRG. 18329. 1 |              | XLOC_020133 | 554   | coding | noncoding | noncoding | noncoding |
| MSTRG. 18350. 1 | SLC30A10     | XLOC_020145 | 312   | coding | noncoding | noncoding | noncoding |
| MSTRG. 18352. 1 | LOC107985281 | XLOC_020146 | 283   | coding | noncoding | noncoding | noncoding |
| MSTRG. 18354. 1 | BPNT1        | XLOC_020152 | 534   | coding | noncoding | noncoding | noncoding |
| MSTRG. 18388. 1 | MARK1        | XLOC_020168 | 288   | coding | noncoding | noncoding | noncoding |
| MSTRG. 18377. 1 |              | XLOC_020171 | 219   | coding | noncoding | noncoding | noncoding |
| MSTRG. 18403. 1 |              | XLOC_020188 | 316   | coding | noncoding | noncoding | noncoding |
| MSTRG. 18438. 1 | LOC105372932 | XLOC_020203 | 302   | coding | coding    | noncoding | noncoding |
| MSTRG. 18546. 1 |              | XLOC_020212 | 263   | coding | noncoding | noncoding | noncoding |
| MSTRG. 18556. 1 | LINC01655    | XLOC_020222 | 353   | coding | noncoding | noncoding | noncoding |
| MSTRG. 18580. 1 | LINC02257    | XLOC_020229 | 395   | coding | noncoding | noncoding | noncoding |
| MSTRG. 18608. 1 |              | XLOC_020247 | 304   | coding | noncoding | noncoding | noncoding |
| MSTRG. 18612. 1 | LOC105372956 | XLOC_020249 | 279   | coding | noncoding | noncoding | noncoding |
| MSTRG. 18644. 1 |              | XLOC_020270 | 279   | coding | noncoding | noncoding | noncoding |
| XM_011509687. 1 | SUSD4        | XLOC_020273 | 3106  | coding | coding    | coding    | coding    |
| MSTRG. 18736. 1 |              | XLOC_020321 | 260   | coding | noncoding | noncoding | noncoding |
| MSTRG. 18759. 1 |              | XLOC_020325 | 280   | coding | noncoding | noncoding | noncoding |
| MSTRG. 18817. 1 | NVL          | XLOC_020331 | 248   | coding | noncoding | noncoding | noncoding |
| MSTRG. 18807. 1 |              | XLOC_020335 | 439   | coding | noncoding | noncoding | noncoding |
| MSTRG. 18827. 1 |              | XLOC_020357 | 309   | coding | coding    | noncoding | noncoding |
| MSTRG. 18900. 1 | DNAH14       | XLOC_020361 | 293   | coding | noncoding | noncoding | noncoding |
| MSTRG. 18902. 1 | DNAH14       | XLOC_020362 | 293   | coding | noncoding | noncoding | noncoding |
| MSTRG. 18909. 1 | DNAH14       | XLOC_020369 | 340   | coding | noncoding | noncoding | noncoding |
| XM_011544185. 3 | LBR          | XLOC_020371 | 4237  | coding | coding    | coding    | coding    |
| MSTRG. 18948. 1 |              | XLOC_020408 | 287   | coding | noncoding | noncoding | noncoding |
| MSTRG. 18928. 1 | LINC01703    | XLOC_020410 | 544   | coding | noncoding | noncoding | noncoding |
| MSTRG. 18934. 1 |              | XLOC_020411 | 307   | coding | noncoding | noncoding | noncoding |
| MSTRG. 18932. 1 | ACBD3        | XLOC_020415 | 293   | coding | noncoding | noncoding | noncoding |
| MSTRG. 18924. 1 | LOC101927247 | XLOC_020417 | 220   | coding | noncoding | noncoding | noncoding |
| MSTRG. 18949. 1 |              | XLOC_020418 | 306   | coding | noncoding | noncoding | noncoding |
| MSTRG. 18957. 1 |              | XLOC_020421 | 217   | coding | noncoding | noncoding | noncoding |
| MSTRG. 18970. 1 |              | XLOC_020426 | 270   | coding | noncoding | noncoding | noncoding |
| XM_017002582. 2 | CDC42BPA     | XLOC_020467 | 6122  | coding | coding    | coding    | coding    |
| MSTRG. 19041. 1 | CDC42BPA     | XLOC_020468 | 234   | coding | noncoding | noncoding | noncoding |
| MSTRG. 18999. 1 |              | XLOC_020473 | 264   | coding | noncoding | noncoding | noncoding |
| MSTRG. 19067. 1 |              | XLOC_020475 | 291   | coding | noncoding | noncoding | noncoding |
| MSTRG. 19084. 1 | WNT3A        | XLOC_020495 | 308   | coding | noncoding | noncoding | noncoding |
| MSTRG. 19128. 1 |              | XLOC_020521 | 225   | coding | coding    | noncoding | noncoding |
| MSTRG. 19161. 1 | OBSCN        | XLOC_020534 | 2080  | coding | coding    | coding    | coding    |
| MSTRG. 19178. 1 | OBSCN        | XLOC_020549 | 223   | coding | coding    | noncoding | noncoding |
| XR_949242. 2    | LINC02814    | XLOC_020587 | 12763 | coding | noncoding | coding    | noncoding |

|                |              |             |      |        |           |           |           |
|----------------|--------------|-------------|------|--------|-----------|-----------|-----------|
| MSTRG.19208.1  |              | XLOC_020599 | 238  | coding | noncoding | noncoding | noncoding |
| MSTRG.19216.1  |              | XLOC_020600 | 253  | coding | noncoding | noncoding | noncoding |
| MSTRG.19412.1  | GALNT2       | XLOC_020624 | 245  | coding | noncoding | noncoding | noncoding |
| NM_000029.4    | AGT          | XLOC_020641 | 2116 | coding | coding    | coding    | coding    |
| MSTRG.19331.1  | LOC105373166 | XLOC_020643 | 234  | coding | noncoding | noncoding | noncoding |
| MSTRG.19346.1  | C1orf198     | XLOC_020650 | 211  | coding | noncoding | noncoding | noncoding |
| MSTRG.19377.1  | TRIM67       | XLOC_020673 | 276  | coding | noncoding | noncoding | noncoding |
| MSTRG.19464.1  | EGLN1        | XLOC_020695 | 267  | coding | noncoding | noncoding | noncoding |
| MSTRG.19443.1  |              | XLOC_020720 | 269  | coding | noncoding | noncoding | noncoding |
| MSTRG.19492.1  |              | XLOC_020739 | 426  | coding | noncoding | noncoding | noncoding |
| MSTRG.19503.1  |              | XLOC_020756 | 286  | coding | noncoding | noncoding | noncoding |
| NM_001328607.2 | PCNX2        | XLOC_020769 | 904  | coding | noncoding | noncoding | noncoding |
| MSTRG.19830.1  | PCNX2        | XLOC_020775 | 311  | coding | noncoding | noncoding | noncoding |
| MSTRG.19843.1  | PCNX2        | XLOC_020780 | 208  | coding | noncoding | noncoding | noncoding |
| MSTRG.19849.1  | PCNX2        | XLOC_020784 | 278  | coding | noncoding | noncoding | noncoding |
| MSTRG.19534.1  |              | XLOC_020790 | 307  | coding | noncoding | noncoding | noncoding |
| MSTRG.19561.1  |              | XLOC_020800 | 308  | coding | noncoding | noncoding | noncoding |
| MSTRG.19586.1  | SLC35F3      | XLOC_020808 | 608  | coding | noncoding | noncoding | noncoding |
| MSTRG.19587.1  | SLC35F3      | XLOC_020809 | 348  | coding | noncoding | noncoding | noncoding |
| MSTRG.19680.1  |              | XLOC_020858 | 347  | coding | noncoding | noncoding | noncoding |
| MSTRG.19657.1  |              | XLOC_020864 | 235  | coding | noncoding | noncoding | noncoding |
| MSTRG.19690.1  |              | XLOC_020889 | 232  | coding | noncoding | noncoding | noncoding |
| XM_017000394.1 | B3GALNT2     | XLOC_020890 | 4848 | coding | coding    | coding    | coding    |
| MSTRG.19695.1  | GNG4         | XLOC_020893 | 269  | coding | noncoding | noncoding | noncoding |
| MSTRG.19697.1  | GNG4         | XLOC_020894 | 306  | coding | noncoding | noncoding | noncoding |
| MSTRG.19862.1  | LINC02768    | XLOC_020945 | 240  | coding | noncoding | noncoding | noncoding |
| MSTRG.19866.1  |              | XLOC_020952 | 305  | coding | noncoding | noncoding | noncoding |
| MSTRG.19868.1  |              | XLOC_020953 | 622  | coding | noncoding | noncoding | noncoding |
| MSTRG.19885.1  |              | XLOC_020971 | 368  | coding | noncoding | noncoding | noncoding |
| MSTRG.19980.4  | HEATR1       | XLOC_020981 | 5882 | coding | coding    | noncoding | noncoding |
| MSTRG.19960.1  |              | XLOC_020982 | 283  | coding | noncoding | noncoding | noncoding |
| MSTRG.19971.1  |              | XLOC_020995 | 313  | coding | noncoding | coding    | noncoding |
| MSTRG.20064.1  | RYS2         | XLOC_021002 | 343  | coding | noncoding | noncoding | noncoding |
| MSTRG.20068.1  | RYS2         | XLOC_021006 | 350  | coding | noncoding | noncoding | noncoding |
| MSTRG.19987.1  |              | XLOC_021014 | 230  | coding | coding    | noncoding | noncoding |
| MSTRG.20006.1  | LOC105373220 | XLOC_021019 | 318  | coding | noncoding | noncoding | noncoding |
| MSTRG.20040.1  |              | XLOC_021034 | 310  | coding | noncoding | noncoding | noncoding |
| MSTRG.20104.1  | FMN2         | XLOC_021067 | 313  | coding | noncoding | coding    | noncoding |
| MSTRG.20110.1  | FMN2         | XLOC_021070 | 203  | coding | noncoding | noncoding | noncoding |
| XM_017002013.1 | RGS7         | XLOC_021080 | 3865 | coding | coding    | coding    | coding    |
| XM_011544132.2 | FH           | XLOC_021089 | 2245 | coding | coding    | coding    | coding    |
| MSTRG.20285.1  | WDR64        | XLOC_021101 | 271  | coding | noncoding | noncoding | noncoding |
| MSTRG.20213.1  |              | XLOC_021105 | 354  | coding | noncoding | noncoding | noncoding |

|                  |               |             |       |        |           |           |           |
|------------------|---------------|-------------|-------|--------|-----------|-----------|-----------|
| MSTRG. 20215. 1  |               | XLOC_021112 | 300   | coding | noncoding | noncoding | noncoding |
| MSTRG. 20221. 1  |               | XLOC_021117 | 266   | coding | noncoding | noncoding | noncoding |
| XM_017000569. 1  | PLD5          | XLOC_021120 | 8321  | coding | coding    | coding    | coding    |
| MSTRG. 20250. 1  | PLD5          | XLOC_021121 | 251   | coding | noncoding | noncoding | noncoding |
| MSTRG. 20245. 1  |               | XLOC_021133 | 281   | coding | noncoding | noncoding | noncoding |
| MSTRG. 20292. 1  |               | XLOC_021188 | 238   | coding | noncoding | noncoding | noncoding |
| MSTRG. 20407. 1  | C1orf100      | XLOC_021210 | 293   | coding | noncoding | noncoding | noncoding |
| MSTRG. 20409. 1  | C1orf100      | XLOC_021211 | 250   | coding | noncoding | noncoding | noncoding |
| MSTRG. 20415. 1  |               | XLOC_021212 | 280   | coding | noncoding | noncoding | noncoding |
| MSTRG. 20344. 1  |               | XLOC_021247 | 276   | coding | noncoding | noncoding | noncoding |
| MSTRG. 20811. 1  | SMYD3         | XLOC_021287 | 377   | coding | noncoding | noncoding | noncoding |
| MSTRG. 20530. 12 | CNST          | XLOC_021367 | 1320  | coding | noncoding | noncoding | noncoding |
| XR_949136. 3     | AHCTF1        | XLOC_021380 | 8747  | coding | coding    | coding    | coding    |
| NM_001323342. 2  | AHCTF1        | XLOC_021380 | 8887  | coding | coding    | coding    | coding    |
| MSTRG. 20539. 1  | ZNF670-ZNF695 | XLOC_021401 | 256   | coding | noncoding | noncoding | noncoding |
| MSTRG. 20611. 1  | LOC107985375  | XLOC_021423 | 271   | coding | noncoding | noncoding | noncoding |
| MSTRG. 20652. 1  |               | XLOC_021445 | 313   | coding | noncoding | noncoding | noncoding |
| MSTRG. 20659. 2  | TRIM58        | XLOC_021448 | 2786  | coding | coding    | coding    | noncoding |
| MSTRG. 20661. 1  |               | XLOC_021449 | 910   | coding | noncoding | noncoding | noncoding |
| MSTRG. 20662. 1  |               | XLOC_021450 | 293   | coding | noncoding | noncoding | noncoding |
| MSTRG. 20653. 1  |               | XLOC_021452 | 548   | coding | noncoding | noncoding | noncoding |
| MSTRG. 20682. 1  | OR2L13        | XLOC_021460 | 246   | coding | coding    | noncoding | noncoding |
| MSTRG. 20727. 1  | OR2T10        | XLOC_021494 | 289   | coding | noncoding | noncoding | noncoding |
| MSTRG. 20774. 1  | PGBD2         | XLOC_021511 | 298   | coding | noncoding | noncoding | noncoding |
| MSTRG. 20792. 1  |               | XLOC_021535 | 252   | coding | noncoding | noncoding | noncoding |
| MSTRG. 20900. 1  |               | XLOC_021542 | 297   | coding | noncoding | noncoding | noncoding |
| MSTRG. 20913. 1  |               | XLOC_021544 | 227   | coding | noncoding | noncoding | noncoding |
| MSTRG. 21049. 1  | MYT1L         | XLOC_021583 | 286   | coding | noncoding | noncoding | noncoding |
| MSTRG. 20970. 1  |               | XLOC_021601 | 248   | coding | noncoding | noncoding | noncoding |
| MSTRG. 21120. 1  |               | XLOC_021646 | 282   | coding | noncoding | noncoding | noncoding |
| MSTRG. 21140. 1  | DCDC2C        | XLOC_021652 | 285   | coding | noncoding | noncoding | noncoding |
| MSTRG. 21129. 1  |               | XLOC_021654 | 386   | coding | noncoding | noncoding | noncoding |
| MSTRG. 21134. 1  |               | XLOC_021657 | 299   | coding | noncoding | noncoding | noncoding |
| MSTRG. 21152. 1  |               | XLOC_021666 | 302   | coding | noncoding | noncoding | noncoding |
| MSTRG. 21154. 1  |               | XLOC_021668 | 278   | coding | noncoding | noncoding | noncoding |
| MSTRG. 21161. 1  |               | XLOC_021671 | 277   | coding | noncoding | noncoding | noncoding |
| MSTRG. 21172. 1  |               | XLOC_021678 | 254   | coding | noncoding | noncoding | noncoding |
| MSTRG. 21185. 1  |               | XLOC_021685 | 264   | coding | noncoding | noncoding | noncoding |
| MSTRG. 21208. 1  |               | XLOC_021697 | 243   | coding | noncoding | noncoding | noncoding |
| NR_026832. 1     | SILC1         | XLOC_021698 | 11868 | coding | noncoding | noncoding | noncoding |
| MSTRG. 21215. 1  | SILC1         | XLOC_021699 | 286   | coding | noncoding | noncoding | noncoding |
| MSTRG. 21227. 1  |               | XLOC_021706 | 272   | coding | noncoding | noncoding | noncoding |
| MSTRG. 21228. 1  |               | XLOC_021707 | 241   | coding | noncoding | noncoding | noncoding |

|                  |              |             |       |        |           |           |           |
|------------------|--------------|-------------|-------|--------|-----------|-----------|-----------|
| MSTRG. 21257. 1  |              | XLOC_021754 | 248   | coding | noncoding | noncoding | noncoding |
| MSTRG. 21275. 1  | LOC105373408 | XLOC_021766 | 290   | coding | noncoding | noncoding | noncoding |
| MSTRG. 21286. 1  | LOC101929551 | XLOC_021769 | 244   | coding | noncoding | noncoding | noncoding |
| MSTRG. 21340. 21 | MBOAT2       | XLOC_021892 | 586   | coding | noncoding | coding    | noncoding |
| MSTRG. 21337. 1  |              | XLOC_021899 | 325   | coding | noncoding | noncoding | noncoding |
| MSTRG. 21339. 1  |              | XLOC_021900 | 249   | coding | noncoding | noncoding | noncoding |
| XM_011510409. 1  | ASAP2        | XLOC_021901 | 5366  | coding | coding    | coding    | coding    |
| XR_001739279. 1  | LOC107985851 | XLOC_021902 | 3533  | coding | noncoding | noncoding | noncoding |
| MSTRG. 21415. 1  | ASAP2        | XLOC_021905 | 253   | coding | noncoding | noncoding | noncoding |
| XR_922777. 2     | LOC101929643 | XLOC_021915 | 1716  | coding | noncoding | noncoding | noncoding |
| MSTRG. 21383. 1  | TAF1B        | XLOC_021933 | 265   | coding | noncoding | noncoding | noncoding |
| MSTRG. 21392. 1  |              | XLOC_021939 | 230   | coding | noncoding | noncoding | noncoding |
| MSTRG. 21402. 1  | RRM2         | XLOC_021941 | 238   | coding | noncoding | noncoding | noncoding |
| MSTRG. 21461. 1  |              | XLOC_021957 | 262   | coding | noncoding | noncoding | noncoding |
| MSTRG. 21464. 1  | LOC105373426 | XLOC_021959 | 296   | coding | noncoding | noncoding | noncoding |
| MSTRG. 21465. 1  | LOC105373426 | XLOC_021960 | 296   | coding | noncoding | noncoding | noncoding |
| XR_002959251. 1  | ATP6V1C2     | XLOC_021964 | 2858  | coding | coding    | coding    | coding    |
| MSTRG. 21620. 1  | C2orf50      | XLOC_021973 | 283   | coding | noncoding | noncoding | noncoding |
| NM_001282710. 1  | SLC66A3      | XLOC_021974 | 1788  | coding | coding    | coding    | coding    |
| MSTRG. 21648. 1  |              | XLOC_021975 | 338   | coding | noncoding | noncoding | noncoding |
| MSTRG. 21654. 1  | LOC105373429 | XLOC_021978 | 278   | coding | noncoding | noncoding | noncoding |
| XM_024453256. 1  | GREB1        | XLOC_021990 | 10768 | coding | coding    | coding    | coding    |
| MSTRG. 21676. 1  | GREB1        | XLOC_021991 | 253   | coding | noncoding | noncoding | noncoding |
| MSTRG. 21669. 1  |              | XLOC_021992 | 206   | coding | noncoding | noncoding | noncoding |
| MSTRG. 21671. 1  |              | XLOC_021993 | 286   | coding | noncoding | noncoding | noncoding |
| XM_011510335. 3  | LPIN1        | XLOC_021994 | 6129  | coding | coding    | coding    | coding    |
| MSTRG. 21747. 1  | LOC105373436 | XLOC_022057 | 230   | coding | noncoding | noncoding | noncoding |
| MSTRG. 21757. 1  | LOC105373436 | XLOC_022061 | 271   | coding | noncoding | noncoding | noncoding |
| MSTRG. 21740. 1  |              | XLOC_022066 | 201   | coding | noncoding | noncoding | noncoding |
| MSTRG. 21769. 1  | LOC105373438 | XLOC_022071 | 246   | coding | noncoding | noncoding | noncoding |
| MSTRG. 21795. 1  | LINC00276    | XLOC_022090 | 218   | coding | noncoding | noncoding | noncoding |
| MSTRG. 21817. 1  |              | XLOC_022103 | 275   | coding | noncoding | noncoding | noncoding |
| MSTRG. 21989. 5  | NBAS         | XLOC_022117 | 4884  | coding | coding    | coding    | noncoding |
| MSTRG. 21935. 1  | DDX1         | XLOC_022121 | 279   | coding | noncoding | noncoding | noncoding |
| MSTRG. 21900. 1  |              | XLOC_022125 | 447   | coding | noncoding | noncoding | noncoding |
| MSTRG. 21910. 1  |              | XLOC_022129 | 397   | coding | noncoding | noncoding | noncoding |
| MSTRG. 21915. 1  | MYCNUT       | XLOC_022133 | 245   | coding | noncoding | noncoding | noncoding |
| MSTRG. 21922. 1  |              | XLOC_022136 | 284   | coding | noncoding | noncoding | noncoding |
| MSTRG. 21925. 1  |              | XLOC_022138 | 223   | coding | noncoding | noncoding | noncoding |
| MSTRG. 21931. 1  |              | XLOC_022141 | 279   | coding | noncoding | noncoding | noncoding |
| MSTRG. 22055. 13 | FAM49A       | XLOC_022159 | 11559 | coding | noncoding | coding    | noncoding |
| MSTRG. 22017. 1  |              | XLOC_022164 | 286   | coding | noncoding | noncoding | noncoding |
| MSTRG. 22036. 1  |              | XLOC_022171 | 252   | coding | noncoding | noncoding | noncoding |

|                 |              |             |      |        |           |           |           |
|-----------------|--------------|-------------|------|--------|-----------|-----------|-----------|
| MSTRG. 22127. 1 | VSNL1        | XLOC_022188 | 268  | coding | noncoding | noncoding | noncoding |
| MSTRG. 22131. 1 | VSNL1        | XLOC_022190 | 246  | coding | noncoding | noncoding | noncoding |
| MSTRG. 22099. 1 |              | XLOC_022201 | 311  | coding | noncoding | noncoding | noncoding |
| MSTRG. 22108. 1 |              | XLOC_022207 | 210  | coding | noncoding | noncoding | noncoding |
| MSTRG. 22116. 1 |              | XLOC_022212 | 223  | coding | noncoding | noncoding | noncoding |
| MSTRG. 22119. 1 | LOC105373454 | XLOC_022215 | 290  | coding | noncoding | noncoding | noncoding |
| MSTRG. 22121. 1 | LOC105373454 | XLOC_022216 | 252  | coding | noncoding | noncoding | noncoding |
| MSTRG. 22367. 1 |              | XLOC_022252 | 274  | coding | noncoding | noncoding | noncoding |
| MSTRG. 22369. 1 |              | XLOC_022253 | 394  | coding | noncoding | noncoding | noncoding |
| MSTRG. 22373. 1 |              | XLOC_022255 | 225  | coding | noncoding | noncoding | noncoding |
| MSTRG. 22317. 1 | LOC101928196 | XLOC_022306 | 259  | coding | noncoding | noncoding | noncoding |
| MSTRG. 22450. 1 | SDC1         | XLOC_022371 | 247  | coding | noncoding | noncoding | noncoding |
| MSTRG. 22583. 4 | PUM2         | XLOC_022373 | 6192 | coding | coding    | coding    | noncoding |
| MSTRG. 22470. 1 |              | XLOC_022388 | 264  | coding | noncoding | noncoding | noncoding |
| MSTRG. 22545. 1 |              | XLOC_022407 | 279  | coding | noncoding | noncoding | noncoding |
| MSTRG. 22571. 1 |              | XLOC_022411 | 278  | coding | noncoding | noncoding | noncoding |
| MSTRG. 22607. 1 | APOB         | XLOC_022417 | 308  | coding | coding    | noncoding | noncoding |
| MSTRG. 22618. 1 |              | XLOC_022420 | 310  | coding | noncoding | noncoding | noncoding |
| MSTRG. 22635. 1 | LOC100507562 | XLOC_022428 | 305  | coding | noncoding | noncoding | noncoding |
| MSTRG. 22641. 1 |              | XLOC_022432 | 257  | coding | noncoding | noncoding | noncoding |
| MSTRG. 22658. 1 |              | XLOC_022437 | 244  | coding | noncoding | coding    | noncoding |
| MSTRG. 22662. 1 |              | XLOC_022441 | 330  | coding | noncoding | noncoding | noncoding |
| NM_052920. 2    | KLHL29       | XLOC_022467 | 5325 | coding | coding    | coding    | coding    |
| MSTRG. 23036. 1 | KLHL29       | XLOC_022472 | 293  | coding | noncoding | noncoding | noncoding |
| NR_136538. 1    | FKBP1B       | XLOC_022491 | 1099 | coding | coding    | coding    | noncoding |
| NR_136536. 1    | FKBP1B       | XLOC_022491 | 1167 | coding | coding    | coding    | noncoding |
| MSTRG. 22928. 1 |              | XLOC_022503 | 249  | coding | noncoding | noncoding | noncoding |
| NM_001362952. 1 | NCOA1        | XLOC_022509 | 7401 | coding | coding    | coding    | coding    |
| MSTRG. 23087. 1 | EFR3B        | XLOC_022609 | 469  | coding | noncoding | noncoding | noncoding |
| MSTRG. 23092. 1 |              | XLOC_022627 | 283  | coding | noncoding | noncoding | noncoding |
| MSTRG. 23110. 1 |              | XLOC_022636 | 260  | coding | noncoding | noncoding | noncoding |
| MSTRG. 23111. 1 |              | XLOC_022637 | 232  | coding | noncoding | noncoding | noncoding |
| MSTRG. 23125. 1 | KIF3C        | XLOC_022646 | 295  | coding | noncoding | coding    | noncoding |
| MSTRG. 23117. 1 |              | XLOC_022653 | 295  | coding | noncoding | noncoding | noncoding |
| MSTRG. 23121. 1 |              | XLOC_022655 | 218  | coding | noncoding | noncoding | noncoding |
| MSTRG. 23187. 1 | RAB10        | XLOC_022664 | 267  | coding | noncoding | noncoding | noncoding |
| MSTRG. 23300. 1 | CIB4         | XLOC_022684 | 462  | coding | noncoding | noncoding | noncoding |
| NM_001809. 4    | CENPA        | XLOC_022690 | 1389 | coding | coding    | coding    | noncoding |
| XR_001738852. 2 | DPYSL5       | XLOC_022691 | 5538 | coding | coding    | coding    | coding    |
| MSTRG. 23334. 1 |              | XLOC_022692 | 227  | coding | noncoding | noncoding | noncoding |
| MSTRG. 23364. 1 | CGREF1       | XLOC_022704 | 266  | coding | noncoding | noncoding | noncoding |
| XM_011533138. 3 | ABHD1        | XLOC_022706 | 1604 | coding | coding    | coding    | coding    |
| NM_175769. 3    | TCF23        | XLOC_022707 | 4882 | coding | coding    | coding    | noncoding |

|                |              |             |              |           |           |           |
|----------------|--------------|-------------|--------------|-----------|-----------|-----------|
| NM_080592.3    | ATRAID       | XLOC_022713 | 1258 coding  | noncoding | coding    | coding    |
| MSTRG.23373.1  | SLC30A3      | XLOC_022716 | 256 coding   | noncoding | noncoding | noncoding |
| NM_001267060.1 | SNX17        | XLOC_022724 | 2400 coding  | coding    | coding    | coding    |
| MSTRG.23447.1  | ZNF512       | XLOC_022745 | 316 coding   | noncoding | noncoding | noncoding |
| MSTRG.23429.1  |              | XLOC_022751 | 281 coding   | noncoding | noncoding | noncoding |
| MSTRG.23622.1  | BABAM2       | XLOC_022764 | 254 coding   | noncoding | noncoding | noncoding |
| MSTRG.23655.1  | BABAM2       | XLOC_022794 | 241 coding   | noncoding | noncoding | noncoding |
| MSTRG.23667.1  | BABAM2       | XLOC_022805 | 496 coding   | noncoding | noncoding | noncoding |
| MSTRG.23462.1  |              | XLOC_022819 | 262 coding   | noncoding | noncoding | noncoding |
| MSTRG.23501.1  | PLB1         | XLOC_022826 | 296 coding   | noncoding | noncoding | noncoding |
| MSTRG.23518.1  | PPP1CB       | XLOC_022833 | 265 coding   | noncoding | noncoding | noncoding |
| MSTRG.23483.1  |              | XLOC_022840 | 387 coding   | noncoding | noncoding | noncoding |
| XM_011532628.2 | TOGARAM2     | XLOC_022852 | 3090 coding  | coding    | coding    | coding    |
| NM_199280.3    | TOGARAM2     | XLOC_022852 | 12691 coding | coding    | coding    | coding    |
| XM_017004318.1 | YPEL5        | XLOC_022886 | 2855 coding  | coding    | coding    | coding    |
| NM_001127399.2 | YPEL5        | XLOC_022886 | 2197 coding  | coding    | coding    | noncoding |
| NM_182551.5    | LCLAT1       | XLOC_022904 | 5071 coding  | coding    | coding    | coding    |
| MSTRG.23792.2  | GALNT14      | XLOC_022944 | 1056 coding  | coding    | coding    | noncoding |
| MSTRG.23758.1  |              | XLOC_022972 | 222 coding   | noncoding | noncoding | noncoding |
| MSTRG.23775.1  | LINC01946    | XLOC_022982 | 351 coding   | coding    | noncoding | noncoding |
| MSTRG.23785.1  |              | XLOC_022991 | 411 coding   | noncoding | noncoding | noncoding |
| MSTRG.23821.1  | SPAST        | XLOC_023007 | 306 coding   | noncoding | noncoding | noncoding |
| MSTRG.23823.1  | SPAST        | XLOC_023009 | 232 coding   | noncoding | noncoding | noncoding |
| MSTRG.24023.1  |              | XLOC_023019 | 321 coding   | noncoding | noncoding | noncoding |
| XM_006712054.3 | BIRC6        | XLOC_023021 | 15866 coding | coding    | coding    | coding    |
| MSTRG.23904.1  | LINC00486    | XLOC_023063 | 378 coding   | noncoding | noncoding | noncoding |
| XM_024452888.1 | LTBP1        | XLOC_023065 | 5679 coding  | coding    | coding    | coding    |
| MSTRG.23916.1  | LTBP1        | XLOC_023068 | 344 coding   | noncoding | noncoding | noncoding |
| MSTRG.23970.1  |              | XLOC_023078 | 298 coding   | noncoding | noncoding | noncoding |
| MSTRG.23930.1  | LINC01317    | XLOC_023090 | 261 coding   | noncoding | noncoding | noncoding |
| MSTRG.23938.1  | LINC01317    | XLOC_023093 | 243 coding   | noncoding | noncoding | noncoding |
| MSTRG.23958.1  |              | XLOC_023100 | 320 coding   | noncoding | noncoding | noncoding |
| MSTRG.23959.1  |              | XLOC_023101 | 295 coding   | noncoding | noncoding | noncoding |
| MSTRG.23991.1  |              | XLOC_023105 | 284 coding   | noncoding | noncoding | noncoding |
| MSTRG.24086.1  | SULT6B1      | XLOC_023146 | 250 coding   | noncoding | noncoding | noncoding |
| MSTRG.24457.1  | LOC105374464 | XLOC_023157 | 310 coding   | noncoding | noncoding | noncoding |
| MSTRG.24185.1  | LINC02613    | XLOC_023226 | 349 coding   | noncoding | noncoding | noncoding |
| MSTRG.24202.1  |              | XLOC_023241 | 223 coding   | coding    | noncoding | noncoding |
| MSTRG.24219.1  |              | XLOC_023249 | 238 coding   | noncoding | noncoding | noncoding |
| MSTRG.24307.1  | CDKL4        | XLOC_023262 | 270 coding   | noncoding | noncoding | noncoding |
| MSTRG.24312.2  | MAP4K3       | XLOC_023265 | 229 coding   | coding    | noncoding | noncoding |
| MSTRG.24303.1  | THUMPD2      | XLOC_023303 | 305 coding   | noncoding | noncoding | noncoding |
| MSTRG.24279.1  |              | XLOC_023307 | 278 coding   | noncoding | noncoding | noncoding |

|                  |              |             |              |           |           |           |
|------------------|--------------|-------------|--------------|-----------|-----------|-----------|
| MSTRG. 24758. 24 | SLC8A1       | XLOC_023309 | 1708 coding  | noncoding | noncoding | noncoding |
| MSTRG. 24758. 27 | SLC8A1       | XLOC_023309 | 3936 coding  | noncoding | noncoding | noncoding |
| MSTRG. 24758. 30 | SLC8A1       | XLOC_023309 | 21291 coding | noncoding | noncoding | noncoding |
| MSTRG. 24766. 1  | SLC8A1       | XLOC_023312 | 275 coding   | noncoding | noncoding | noncoding |
| MSTRG. 24775. 1  | LOC101929667 | XLOC_023321 | 277 coding   | noncoding | noncoding | noncoding |
| MSTRG. 24374. 1  | LOC105374497 | XLOC_023331 | 225 coding   | noncoding | noncoding | noncoding |
| MSTRG. 24383. 1  | LOC105374497 | XLOC_023336 | 314 coding   | noncoding | noncoding | noncoding |
| MSTRG. 24441. 1  | LOC105374506 | XLOC_023355 | 306 coding   | noncoding | noncoding | noncoding |
| MSTRG. 24391. 1  |              | XLOC_023360 | 305 coding   | noncoding | noncoding | noncoding |
| MSTRG. 24409. 1  |              | XLOC_023371 | 234 coding   | noncoding | noncoding | noncoding |
| MSTRG. 24641. 1  | COX7A2L      | XLOC_023385 | 401 coding   | noncoding | noncoding | noncoding |
| MSTRG. 24643. 2  | COX7A2L      | XLOC_023387 | 571 coding   | coding    | noncoding | noncoding |
| MSTRG. 24452. 1  | KCNG3        | XLOC_023388 | 216 coding   | noncoding | noncoding | noncoding |
| MSTRG. 24653. 1  | MTA3         | XLOC_023392 | 287 coding   | noncoding | noncoding | noncoding |
| MSTRG. 24661. 1  | MTA3         | XLOC_023395 | 474 coding   | noncoding | noncoding | noncoding |
| MSTRG. 24669. 1  | MTA3         | XLOC_023400 | 295 coding   | noncoding | noncoding | noncoding |
| MSTRG. 24670. 1  | MTA3         | XLOC_023401 | 215 coding   | noncoding | noncoding | noncoding |
| MSTRG. 24683. 1  | MTA3         | XLOC_023407 | 248 coding   | noncoding | noncoding | noncoding |
| MSTRG. 24612. 1  |              | XLOC_023412 | 246 coding   | noncoding | noncoding | noncoding |
| MSTRG. 24613. 1  |              | XLOC_023413 | 246 coding   | noncoding | noncoding | noncoding |
| MSTRG. 24616. 1  | LOC112268413 | XLOC_023416 | 272 coding   | noncoding | noncoding | noncoding |
| MSTRG. 24841. 1  |              | XLOC_023448 | 270 coding   | noncoding | noncoding | noncoding |
| MSTRG. 24731. 2  | LRPPRC       | XLOC_023472 | 5127 coding  | coding    | coding    | noncoding |
| XM_017004395. 2  | PPM1B        | XLOC_023476 | 2654 coding  | coding    | coding    | coding    |
| MSTRG. 24749. 1  | PPM1B        | XLOC_023478 | 218 coding   | noncoding | noncoding | noncoding |
| MSTRG. 24788. 1  | SIX2         | XLOC_023494 | 525 coding   | noncoding | noncoding | noncoding |
| XM_006712050. 3  | PRKCE        | XLOC_023520 | 4880 coding  | coding    | coding    | coding    |
| MSTRG. 25273. 1  | PRKCE        | XLOC_023524 | 213 coding   | noncoding | noncoding | noncoding |
| MSTRG. 24957. 1  | EPAS1        | XLOC_023555 | 303 coding   | coding    | noncoding | noncoding |
| MSTRG. 25030. 12 | RHOQ         | XLOC_023570 | 540 coding   | noncoding | noncoding | noncoding |
| MSTRG. 24992. 1  | SOCS5        | XLOC_023578 | 231 coding   | noncoding | noncoding | noncoding |
| MSTRG. 25113. 1  | TTC7A        | XLOC_023586 | 9652 coding  | coding    | coding    | coding    |
| MSTRG. 25003. 1  | EPCAM-DT     | XLOC_023601 | 239 coding   | noncoding | noncoding | noncoding |
| MSTRG. 25004. 1  | EPCAM-DT     | XLOC_023602 | 219 coding   | noncoding | noncoding | noncoding |
| MSTRG. 25008. 1  | EPCAM-DT     | XLOC_023605 | 297 coding   | noncoding | noncoding | noncoding |
| MSTRG. 25015. 1  | EPCAM-DT     | XLOC_023609 | 227 coding   | noncoding | noncoding | noncoding |
| MSTRG. 25017. 1  | EPCAM-DT     | XLOC_023610 | 318 coding   | noncoding | noncoding | noncoding |
| XM_005264332. 4  | MSH2         | XLOC_023613 | 7145 coding  | coding    | coding    | coding    |
| MSTRG. 25065. 1  | MSH2         | XLOC_023614 | 232 coding   | noncoding | noncoding | noncoding |
| MSTRG. 25068. 1  | MSH2         | XLOC_023617 | 290 coding   | noncoding | noncoding | noncoding |
| MSTRG. 25071. 1  | MSH2         | XLOC_023620 | 426 coding   | noncoding | noncoding | noncoding |
| MSTRG. 25130. 1  | LOC105374589 | XLOC_023636 | 249 coding   | noncoding | noncoding | noncoding |
| MSTRG. 25132. 1  |              | XLOC_023638 | 297 coding   | noncoding | noncoding | noncoding |

|                 |              |             |             |           |           |           |
|-----------------|--------------|-------------|-------------|-----------|-----------|-----------|
| MSTRG. 25165. 1 |              | XLOC_023663 | 290 coding  | noncoding | noncoding | noncoding |
| MSTRG. 25176. 1 | LOC102724008 | XLOC_023669 | 312 coding  | noncoding | noncoding | noncoding |
| MSTRG. 25217. 1 |              | XLOC_023712 | 242 coding  | noncoding | noncoding | noncoding |
| MSTRG. 25224. 1 |              | XLOC_023713 | 260 coding  | noncoding | noncoding | noncoding |
| MSTRG. 25225. 1 |              | XLOC_023714 | 385 coding  | noncoding | noncoding | noncoding |
| MSTRG. 25232. 1 |              | XLOC_023718 | 311 coding  | noncoding | noncoding | noncoding |
| MSTRG. 25414. 1 | NRXN1        | XLOC_023725 | 302 coding  | noncoding | noncoding | noncoding |
| MSTRG. 25434. 1 | NRXN1        | XLOC_023735 | 260 coding  | noncoding | noncoding | noncoding |
| MSTRG. 25320. 1 | LOC730100    | XLOC_023789 | 287 coding  | noncoding | noncoding | noncoding |
| MSTRG. 25324. 1 | LOC730100    | XLOC_023791 | 290 coding  | noncoding | noncoding | noncoding |
| MSTRG. 25328. 1 | LOC730100    | XLOC_023792 | 283 coding  | noncoding | noncoding | noncoding |
| MSTRG. 25336. 1 | LOC730100    | XLOC_023797 | 279 coding  | noncoding | noncoding | noncoding |
| MSTRG. 25302. 1 |              | XLOC_023803 | 324 coding  | noncoding | noncoding | noncoding |
| MSTRG. 25301. 1 |              | XLOC_023804 | 206 coding  | noncoding | noncoding | noncoding |
| MSTRG. 25308. 1 |              | XLOC_023809 | 244 coding  | noncoding | noncoding | noncoding |
| MSTRG. 25356. 1 |              | XLOC_023832 | 249 coding  | coding    | noncoding | noncoding |
| MSTRG. 25358. 1 |              | XLOC_023833 | 230 coding  | noncoding | noncoding | noncoding |
| NM_001100396. 2 | C2orf73      | XLOC_023859 | 1975 coding | coding    | noncoding | coding    |
| MSTRG. 25498. 1 | C2orf73      | XLOC_023860 | 310 coding  | coding    | noncoding | noncoding |
| MSTRG. 25514. 1 | SPTBN1       | XLOC_023871 | 268 coding  | noncoding | noncoding | noncoding |
| MSTRG. 25600. 1 |              | XLOC_023906 | 261 coding  | noncoding | noncoding | noncoding |
| MSTRG. 25603. 8 | CCDC88A      | XLOC_023907 | 537 coding  | noncoding | noncoding | noncoding |
| MSTRG. 25729. 1 |              | XLOC_023940 | 281 coding  | noncoding | noncoding | noncoding |
| MSTRG. 26023. 1 | LOC105377632 | XLOC_023964 | 242 coding  | noncoding | noncoding | noncoding |
| MSTRG. 25743. 1 |              | XLOC_024094 | 271 coding  | noncoding | noncoding | noncoding |
| MSTRG. 25846. 1 |              | XLOC_024144 | 225 coding  | noncoding | noncoding | noncoding |
| MSTRG. 25855. 1 |              | XLOC_024148 | 253 coding  | noncoding | noncoding | noncoding |
| MSTRG. 25856. 1 |              | XLOC_024149 | 241 coding  | noncoding | noncoding | noncoding |
| MSTRG. 25857. 1 |              | XLOC_024150 | 423 coding  | noncoding | noncoding | noncoding |
| MSTRG. 25891. 1 | REL          | XLOC_024157 | 244 coding  | noncoding | noncoding | noncoding |
| MSTRG. 25899. 1 | PEX13        | XLOC_024164 | 332 coding  | coding    | noncoding | noncoding |
| MSTRG. 25913. 1 |              | XLOC_024176 | 228 coding  | noncoding | noncoding | noncoding |
| MSTRG. 25919. 1 |              | XLOC_024178 | 257 coding  | noncoding | noncoding | noncoding |
| MSTRG. 25954. 1 | COMMD1       | XLOC_024185 | 227 coding  | noncoding | noncoding | noncoding |
| MSTRG. 25958. 1 | COMMD1       | XLOC_024189 | 295 coding  | noncoding | noncoding | noncoding |
| MSTRG. 25943. 1 | B3GNT2       | XLOC_024200 | 213 coding  | noncoding | noncoding | noncoding |
| MSTRG. 25985. 1 |              | XLOC_024208 | 221 coding  | noncoding | noncoding | noncoding |
| MSTRG. 25975. 1 |              | XLOC_024217 | 232 coding  | noncoding | noncoding | noncoding |
| MSTRG. 25996. 1 |              | XLOC_024218 | 395 coding  | noncoding | noncoding | noncoding |
| MSTRG. 26217. 1 | EHBP1        | XLOC_024223 | 260 coding  | noncoding | noncoding | noncoding |
| MSTRG. 26222. 1 | EHBP1        | XLOC_024228 | 289 coding  | noncoding | noncoding | noncoding |
| MSTRG. 26618. 1 |              | XLOC_024298 | 534 coding  | noncoding | noncoding | noncoding |
| MSTRG. 26627. 1 | LGALSL-DT    | XLOC_024305 | 308 coding  | noncoding | noncoding | noncoding |

|                 |              |             |             |           |           |           |
|-----------------|--------------|-------------|-------------|-----------|-----------|-----------|
| MSTRG. 26276. 1 |              | XLOC_024336 | 251 coding  | noncoding | noncoding | noncoding |
| MSTRG. 26300. 1 | LINC02245    | XLOC_024342 | 240 coding  | noncoding | noncoding | noncoding |
| MSTRG. 26306. 1 |              | XLOC_024367 | 276 coding  | noncoding | noncoding | noncoding |
| MSTRG. 26337. 3 | ACTR2        | XLOC_024375 | 1581 coding | coding    | coding    | coding    |
| MSTRG. 26342. 1 |              | XLOC_024398 | 401 coding  | noncoding | noncoding | noncoding |
| MSTRG. 26343. 1 |              | XLOC_024399 | 318 coding  | noncoding | noncoding | noncoding |
| MSTRG. 26353. 1 |              | XLOC_024402 | 305 coding  | noncoding | noncoding | noncoding |
| MSTRG. 26382. 1 | LOC105369167 | XLOC_024407 | 251 coding  | noncoding | noncoding | noncoding |
| MSTRG. 26436. 1 | LOC105369168 | XLOC_024417 | 360 coding  | noncoding | noncoding | noncoding |
| MSTRG. 26476. 1 | LINC01829    | XLOC_024444 | 263 coding  | noncoding | coding    | noncoding |
| MSTRG. 26502. 1 |              | XLOC_024452 | 298 coding  | noncoding | noncoding | noncoding |
| MSTRG. 26518. 1 | LOC105374786 | XLOC_024465 | 309 coding  | noncoding | noncoding | noncoding |
| MSTRG. 26710. 1 |              | XLOC_024494 | 221 coding  | noncoding | noncoding | noncoding |
| MSTRG. 26868. 1 |              | XLOC_024656 | 324 coding  | noncoding | noncoding | noncoding |
| NM_001330425. 3 | NAGK         | XLOC_024689 | 2286 coding | coding    | coding    | coding    |
| MSTRG. 27085. 1 |              | XLOC_024783 | 268 coding  | noncoding | noncoding | noncoding |
| NM_003124. 5    | SPR          | XLOC_024785 | 1432 coding | coding    | coding    | coding    |
| MSTRG. 27093. 1 |              | XLOC_024794 | 236 coding  | noncoding | noncoding | noncoding |
| MSTRG. 27094. 1 |              | XLOC_024795 | 294 coding  | noncoding | noncoding | noncoding |
| MSTRG. 27096. 1 |              | XLOC_024797 | 473 coding  | noncoding | noncoding | noncoding |
| MSTRG. 27098. 1 |              | XLOC_024799 | 246 coding  | noncoding | noncoding | noncoding |
| MSTRG. 27108. 1 | EGR4         | XLOC_024812 | 239 coding  | noncoding | noncoding | noncoding |
| MSTRG. 27244. 1 | ALMS1        | XLOC_024822 | 254 coding  | noncoding | noncoding | noncoding |
| MSTRG. 27148. 1 |              | XLOC_024833 | 390 coding  | noncoding | noncoding | noncoding |
| NR_134896. 1    | DGUOK        | XLOC_024849 | 749 coding  | coding    | coding    | noncoding |
| NM_080918. 3    | DGUOK        | XLOC_024849 | 811 coding  | coding    | coding    | coding    |
| MSTRG. 27258. 1 |              | XLOC_024894 | 261 coding  | noncoding | noncoding | noncoding |
| NM_001320824. 2 | WDR54        | XLOC_024899 | 1180 coding | noncoding | coding    | coding    |
| XM_017004709. 1 | TTC31        | XLOC_024910 | 3042 coding | coding    | coding    | coding    |
| XR_001738589. 2 | SEMA4F       | XLOC_024926 | 3389 coding | coding    | coding    | coding    |
| MSTRG. 27384. 1 | LOC102724482 | XLOC_024930 | 216 coding  | noncoding | noncoding | noncoding |
| MSTRG. 27813. 3 | POLE4        | XLOC_024935 | 3029 coding | coding    | noncoding | noncoding |
| MSTRG. 27430. 1 |              | XLOC_024978 | 217 coding  | noncoding | noncoding | noncoding |
| MSTRG. 27502. 1 | LRRTM4       | XLOC_025011 | 281 coding  | noncoding | noncoding | noncoding |
| MSTRG. 27503. 1 | LRRTM4       | XLOC_025012 | 321 coding  | noncoding | noncoding | noncoding |
| MSTRG. 27529. 1 | LOC101927967 | XLOC_025019 | 240 coding  | coding    | noncoding | noncoding |
| MSTRG. 27553. 1 |              | XLOC_025036 | 206 coding  | noncoding | noncoding | noncoding |
| MSTRG. 27557. 1 |              | XLOC_025039 | 225 coding  | noncoding | noncoding | noncoding |
| MSTRG. 27605. 1 | CTNNA2       | XLOC_025048 | 289 coding  | noncoding | noncoding | noncoding |
| MSTRG. 27608. 1 | CTNNA2       | XLOC_025050 | 246 coding  | noncoding | noncoding | noncoding |
| MSTRG. 27609. 1 | CTNNA2       | XLOC_025051 | 245 coding  | noncoding | noncoding | noncoding |
| MSTRG. 27610. 1 | CTNNA2       | XLOC_025052 | 308 coding  | noncoding | noncoding | noncoding |
| MSTRG. 27618. 1 | CTNNA2       | XLOC_025055 | 282 coding  | noncoding | noncoding | noncoding |

|                  |              |             |              |           |           |           |
|------------------|--------------|-------------|--------------|-----------|-----------|-----------|
| MSTRG. 27636. 1  | CTNNA2       | XLOC_025062 | 305 coding   | noncoding | noncoding | noncoding |
| MSTRG. 27587. 1  |              | XLOC_025075 | 246 coding   | noncoding | noncoding | noncoding |
| MSTRG. 27653. 1  | LOC102724542 | XLOC_025079 | 286 coding   | noncoding | noncoding | noncoding |
| MSTRG. 27671. 1  |              | XLOC_025089 | 310 coding   | noncoding | noncoding | noncoding |
| MSTRG. 27679. 1  |              | XLOC_025093 | 220 coding   | noncoding | noncoding | noncoding |
| MSTRG. 27686. 1  |              | XLOC_025102 | 286 coding   | noncoding | noncoding | noncoding |
| MSTRG. 27695. 1  |              | XLOC_025104 | 327 coding   | noncoding | noncoding | noncoding |
| MSTRG. 27709. 1  |              | XLOC_025111 | 241 coding   | noncoding | noncoding | noncoding |
| MSTRG. 27724. 1  |              | XLOC_025120 | 274 coding   | noncoding | noncoding | noncoding |
| MSTRG. 27741. 1  | LOC107985905 | XLOC_025128 | 237 coding   | noncoding | noncoding | noncoding |
| MSTRG. 27733. 1  |              | XLOC_025129 | 224 coding   | noncoding | noncoding | noncoding |
| MSTRG. 27765. 1  | KCMF1        | XLOC_025147 | 278 coding   | noncoding | noncoding | noncoding |
| MSTRG. 27748. 1  |              | XLOC_025153 | 235 coding   | noncoding | noncoding | noncoding |
| MSTRG. 27954. 1  | TCF7L1       | XLOC_025155 | 334 coding   | noncoding | noncoding | noncoding |
| MSTRG. 27962. 1  | TCF7L1       | XLOC_025159 | 254 coding   | noncoding | noncoding | noncoding |
| MSTRG. 27963. 1  | TGOLN2       | XLOC_025160 | 6315 coding  | coding    | coding    | coding    |
| NM_001329791. 2  | ELMOD3       | XLOC_025161 | 2662 coding  | coding    | coding    | coding    |
| XM_006711922. 2  | USP39        | XLOC_025185 | 2144 coding  | coding    | coding    | coding    |
| XR_001739003. 1  | ATOH8        | XLOC_025191 | 10861 coding | coding    | coding    | coding    |
| XR_002959408. 1  | LOC112268420 | XLOC_025198 | 8636 coding  | noncoding | noncoding | noncoding |
| XM_024452994. 1  | KDM3A        | XLOC_025219 | 4774 coding  | coding    | coding    | coding    |
| MSTRG. 28161. 1  | RNF103-CHMP3 | XLOC_025245 | 225 coding   | noncoding | noncoding | noncoding |
| MSTRG. 28175. 1  | RMND5A       | XLOC_025255 | 274 coding   | noncoding | noncoding | noncoding |
| MSTRG. 28116. 1  |              | XLOC_025271 | 254 coding   | noncoding | noncoding | noncoding |
| MSTRG. 28225. 1  |              | XLOC_025326 | 207 coding   | noncoding | noncoding | noncoding |
| MSTRG. 28237. 1  |              | XLOC_025329 | 260 coding   | noncoding | noncoding | noncoding |
| MSTRG. 28243. 1  |              | XLOC_025330 | 260 coding   | noncoding | noncoding | noncoding |
| MSTRG. 28254. 1  |              | XLOC_025334 | 246 coding   | noncoding | noncoding | noncoding |
| MSTRG. 28427. 15 | IGKC         | XLOC_025345 | 631 coding   | coding    | coding    | coding    |
| MSTRG. 28427. 43 | IGKC         | XLOC_025345 | 695 coding   | coding    | coding    | coding    |
| MSTRG. 28445. 1  | IGKV4-1      | XLOC_025356 | 246 coding   | noncoding | noncoding | noncoding |
| MSTRG. 28286. 1  |              | XLOC_025364 | 266 coding   | noncoding | noncoding | noncoding |
| XR_001739589. 1  | LOC101926969 | XLOC_025365 | 2720 coding  | noncoding | noncoding | noncoding |
| MSTRG. 28299. 1  | LSP1P4       | XLOC_025368 | 717 coding   | noncoding | noncoding | noncoding |
| MSTRG. 28301. 1  |              | XLOC_025370 | 297 coding   | noncoding | noncoding | noncoding |
| MSTRG. 28390. 1  | LOC107985915 | XLOC_025391 | 270 coding   | noncoding | noncoding | noncoding |
| XM_017005468. 2  | LOC100509620 | XLOC_025396 | 2279 coding  | coding    | coding    | coding    |
| NM_001286559. 2  | TEKT4        | XLOC_025401 | 2215 coding  | coding    | coding    | coding    |
| MSTRG. 28502. 1  |              | XLOC_025424 | 216 coding   | noncoding | noncoding | noncoding |
| MSTRG. 28520. 1  |              | XLOC_025436 | 205 coding   | noncoding | noncoding | noncoding |
| MSTRG. 28534. 1  |              | XLOC_025441 | 212 coding   | noncoding | noncoding | noncoding |
| MSTRG. 28541. 1  |              | XLOC_025442 | 326 coding   | coding    | noncoding | noncoding |
| MSTRG. 28582. 8  | ANKRD36C     | XLOC_025443 | 1225 coding  | coding    | coding    | noncoding |

|                  |          |             |              |           |           |           |
|------------------|----------|-------------|--------------|-----------|-----------|-----------|
| MSTRG. 28582. 7  | ANKRD36C | XLOC_025443 | 1225 coding  | coding    | coding    | noncoding |
| MSTRG. 28551. 1  | FAHD2CP  | XLOC_025449 | 243 coding   | noncoding | noncoding | noncoding |
| MSTRG. 28552. 1  | FAHD2CP  | XLOC_025450 | 231 coding   | noncoding | coding    | noncoding |
| MSTRG. 28564. 1  |          | XLOC_025456 | 227 coding   | noncoding | noncoding | noncoding |
| MSTRG. 28628. 4  | TMEM127  | XLOC_025461 | 6055 coding  | noncoding | coding    | noncoding |
| MSTRG. 28628. 3  | TMEM127  | XLOC_025461 | 3823 coding  | noncoding | coding    | noncoding |
| MSTRG. 28628. 7  | TMEM127  | XLOC_025461 | 2751 coding  | noncoding | coding    | noncoding |
| MSTRG. 28618. 1  | NCAPH    | XLOC_025465 | 271 coding   | noncoding | noncoding | noncoding |
| MSTRG. 28612. 1  |          | XLOC_025466 | 224 coding   | noncoding | noncoding | noncoding |
| XM_011512124. 2  | FER1L5   | XLOC_025481 | 6097 coding  | coding    | coding    | coding    |
| MSTRG. 28651. 1  | FER1L5   | XLOC_025482 | 219 coding   | noncoding | noncoding | noncoding |
| MSTRG. 28652. 1  | FER1L5   | XLOC_025483 | 216 coding   | noncoding | noncoding | noncoding |
| XM_011510955. 3  | CNNM4    | XLOC_025487 | 2360 coding  | coding    | coding    | coding    |
| MSTRG. 28689. 9  | CNNM3    | XLOC_025488 | 5551 coding  | coding    | coding    | coding    |
| MSTRG. 28682. 1  | FAM178B  | XLOC_025505 | 261 coding   | noncoding | noncoding | noncoding |
| MSTRG. 28746. 1  | ANKRD36  | XLOC_025515 | 297 coding   | noncoding | noncoding | noncoding |
| MSTRG. 28722. 1  |          | XLOC_025539 | 253 coding   | noncoding | noncoding | noncoding |
| MSTRG. 28817. 5  | TMEM131  | XLOC_025556 | 1351 coding  | coding    | noncoding | noncoding |
| MSTRG. 28789. 1  | VWA3B    | XLOC_025564 | 262 coding   | noncoding | noncoding | noncoding |
| XM_011510554. 2  | CNGA3    | XLOC_025570 | 4623 coding  | coding    | coding    | coding    |
| NM_001134225. 2  | INPP4A   | XLOC_025572 | 10096 coding | noncoding | coding    | coding    |
| MSTRG. 28985. 9  | UNC50    | XLOC_025598 | 7651 coding  | coding    | coding    | noncoding |
| MSTRG. 28860. 1  |          | XLOC_025603 | 244 coding   | noncoding | noncoding | noncoding |
| MSTRG. 28906. 1  | TSGA10   | XLOC_025624 | 260 coding   | noncoding | noncoding | noncoding |
| NM_145198. 3     | LIPT1    | XLOC_025640 | 1508 coding  | noncoding | coding    | coding    |
| MSTRG. 28932. 2  | MITD1    | XLOC_025642 | 914 coding   | coding    | noncoding | noncoding |
| MSTRG. 28938. 1  |          | XLOC_025644 | 240 coding   | noncoding | noncoding | noncoding |
| MSTRG. 28953. 1  |          | XLOC_025655 | 297 coding   | noncoding | noncoding | noncoding |
| MSTRG. 29663. 1  | AFF3     | XLOC_025659 | 1985 coding  | coding    | coding    | noncoding |
| MSTRG. 29664. 4  | AFF3     | XLOC_025660 | 1027 coding  | coding    | coding    | noncoding |
| MSTRG. 29020. 1  |          | XLOC_025670 | 241 coding   | noncoding | noncoding | noncoding |
| MSTRG. 29022. 1  |          | XLOC_025672 | 268 coding   | noncoding | noncoding | noncoding |
| MSTRG. 29184. 15 | CNOT11   | XLOC_025708 | 6452 coding  | coding    | coding    | noncoding |
| MSTRG. 29082. 1  | CREG2    | XLOC_025711 | 282 coding   | noncoding | noncoding | noncoding |
| MSTRG. 29088. 1  |          | XLOC_025723 | 420 coding   | noncoding | noncoding | noncoding |
| MSTRG. 29093. 1  |          | XLOC_025724 | 235 coding   | noncoding | noncoding | noncoding |
| MSTRG. 29117. 1  |          | XLOC_025726 | 296 coding   | noncoding | noncoding | noncoding |
| MSTRG. 29305. 1  | IL18RAP  | XLOC_025837 | 979 coding   | noncoding | noncoding | noncoding |
| MSTRG. 29333. 1  |          | XLOC_025871 | 245 coding   | noncoding | noncoding | noncoding |
| MSTRG. 29366. 1  |          | XLOC_025888 | 322 coding   | noncoding | noncoding | noncoding |
| XM_017005103. 1  | NCK2     | XLOC_025942 | 2775 coding  | coding    | coding    | coding    |
| MSTRG. 29593. 1  |          | XLOC_025971 | 259 coding   | noncoding | noncoding | noncoding |
| MSTRG. 29523. 2  | UXS1     | XLOC_025980 | 2010 coding  | coding    | noncoding | noncoding |

|                 |              |             |              |           |           |           |
|-----------------|--------------|-------------|--------------|-----------|-----------|-----------|
| MSTRG. 29508. 1 |              | XLOC_025981 | 242 coding   | noncoding | noncoding | noncoding |
| MSTRG. 29510. 1 |              | XLOC_025982 | 307 coding   | noncoding | noncoding | noncoding |
| MSTRG. 29512. 1 |              | XLOC_025983 | 250 coding   | noncoding | noncoding | noncoding |
| MSTRG. 29551. 1 | RGPD3        | XLOC_025992 | 276 coding   | noncoding | noncoding | noncoding |
| MSTRG. 29552. 1 | RGPD3        | XLOC_025993 | 279 coding   | noncoding | noncoding | noncoding |
| MSTRG. 29542. 1 |              | XLOC_026000 | 243 coding   | noncoding | noncoding | noncoding |
| MSTRG. 29602. 1 |              | XLOC_026004 | 314 coding   | noncoding | noncoding | noncoding |
| MSTRG. 29604. 1 |              | XLOC_026008 | 243 coding   | noncoding | noncoding | noncoding |
| MSTRG. 29621. 1 | LINC01885    | XLOC_026013 | 248 coding   | noncoding | noncoding | noncoding |
| MSTRG. 29631. 1 | GACAT1       | XLOC_026023 | 288 coding   | noncoding | noncoding | noncoding |
| MSTRG. 29643. 1 | RGPD4        | XLOC_026026 | 417 coding   | noncoding | noncoding | noncoding |
| NM_006588. 4    | SULT1C4      | XLOC_026037 | 2850 coding  | coding    | coding    | coding    |
| MSTRG. 29729. 1 | LIMS1        | XLOC_026054 | 227 coding   | noncoding | noncoding | noncoding |
| XM_017003492. 1 | CCDC138      | XLOC_026064 | 4743 coding  | coding    | coding    | coding    |
| MSTRG. 29658. 1 | CCDC138      | XLOC_026066 | 300 coding   | noncoding | noncoding | noncoding |
| MSTRG. 29916. 1 | SH3RF3       | XLOC_026086 | 228 coding   | noncoding | noncoding | noncoding |
| XR_002959478. 1 | LOC112268438 | XLOC_026116 | 3465 coding  | noncoding | coding    | noncoding |
| MSTRG. 29792. 1 | LOC105373548 | XLOC_026117 | 248 coding   | noncoding | noncoding | noncoding |
| MSTRG. 29816. 1 | NPHP1        | XLOC_026124 | 218 coding   | noncoding | noncoding | noncoding |
| MSTRG. 29988. 1 | ACOXL        | XLOC_026163 | 264 coding   | noncoding | noncoding | noncoding |
| NM_138624. 3    | BCL2L11      | XLOC_026166 | 5132 coding  | coding    | noncoding | coding    |
| MSTRG. 30020. 1 | MERTK        | XLOC_026189 | 266 coding   | noncoding | noncoding | noncoding |
| MSTRG. 30089. 1 |              | XLOC_026204 | 268 coding   | noncoding | noncoding | noncoding |
| MSTRG. 30133. 1 |              | XLOC_026211 | 228 coding   | noncoding | noncoding | noncoding |
| MSTRG. 30118. 1 |              | XLOC_026216 | 323 coding   | noncoding | noncoding | noncoding |
| MSTRG. 30120. 1 |              | XLOC_026218 | 364 coding   | noncoding | noncoding | noncoding |
| NM_153712. 5    | TTL          | XLOC_026220 | 14267 coding | coding    | coding    | coding    |
| MSTRG. 30149. 1 | TTL          | XLOC_026222 | 401 coding   | noncoding | noncoding | coding    |
| MSTRG. 30184. 1 |              | XLOC_026246 | 352 coding   | noncoding | noncoding | noncoding |
| MSTRG. 30186. 1 |              | XLOC_026249 | 388 coding   | noncoding | noncoding | noncoding |
| MSTRG. 30293. 1 | CBWD2        | XLOC_026284 | 264 coding   | coding    | noncoding | noncoding |
| MSTRG. 30301. 1 |              | XLOC_026304 | 261 coding   | noncoding | noncoding | noncoding |
| MSTRG. 30391. 1 | ACTR3-AS1    | XLOC_026318 | 277 coding   | noncoding | noncoding | noncoding |
| NM_001178037. 2 | DPP10        | XLOC_026361 | 5971 coding  | coding    | coding    | coding    |
| MSTRG. 30483. 1 | DPP10        | XLOC_026370 | 287 coding   | coding    | noncoding | noncoding |
| MSTRG. 30495. 1 | DPP10        | XLOC_026376 | 228 coding   | noncoding | noncoding | noncoding |
| MSTRG. 30349. 1 |              | XLOC_026389 | 221 coding   | noncoding | noncoding | noncoding |
| MSTRG. 30353. 1 |              | XLOC_026391 | 350 coding   | noncoding | noncoding | noncoding |
| MSTRG. 30377. 1 |              | XLOC_026403 | 304 coding   | noncoding | noncoding | noncoding |
| MSTRG. 30458. 1 |              | XLOC_026417 | 251 coding   | noncoding | noncoding | noncoding |
| MSTRG. 30518. 2 | DDX18        | XLOC_026418 | 358 coding   | coding    | noncoding | noncoding |
| MSTRG. 30588. 1 |              | XLOC_026451 | 293 coding   | noncoding | noncoding | noncoding |
| MSTRG. 30592. 1 | LOC105373579 | XLOC_026453 | 231 coding   | noncoding | noncoding | noncoding |

|                 |              |             |             |           |           |           |
|-----------------|--------------|-------------|-------------|-----------|-----------|-----------|
| MSTRG. 30615. 1 |              | XLOC_026468 | 272 coding  | noncoding | noncoding | noncoding |
| MSTRG. 30668. 1 | C2orf76      | XLOC_026481 | 295 coding  | noncoding | noncoding | noncoding |
| NM_001352432. 1 | DBI          | XLOC_026486 | 904 coding  | coding    | noncoding | noncoding |
| MSTRG. 30676. 1 | CFAP221      | XLOC_026492 | 224 coding  | noncoding | noncoding | noncoding |
| MSTRG. 30798. 1 | LOC105373582 | XLOC_026532 | 676 coding  | noncoding | noncoding | noncoding |
| MSTRG. 30677. 1 |              | XLOC_026533 | 263 coding  | noncoding | noncoding | noncoding |
| NM_001369400. 1 | RALB         | XLOC_026535 | 2250 coding | coding    | coding    | coding    |
| MSTRG. 30731. 1 | LOC105373585 | XLOC_026542 | 286 coding  | noncoding | noncoding | noncoding |
| MSTRG. 30732. 1 |              | XLOC_026543 | 296 coding  | noncoding | noncoding | noncoding |
| MSTRG. 30748. 1 |              | XLOC_026558 | 236 coding  | noncoding | noncoding | noncoding |
| MSTRG. 30810. 1 |              | XLOC_026577 | 279 coding  | coding    | noncoding | noncoding |
| MSTRG. 30815. 1 | LOC105373590 | XLOC_026579 | 221 coding  | noncoding | noncoding | noncoding |
| MSTRG. 30842. 1 | LOC105373592 | XLOC_026586 | 231 coding  | noncoding | noncoding | noncoding |
| MSTRG. 30850. 1 | LOC105373592 | XLOC_026588 | 298 coding  | noncoding | noncoding | noncoding |
| MSTRG. 30826. 1 |              | XLOC_026596 | 205 coding  | noncoding | noncoding | noncoding |
| MSTRG. 30883. 1 |              | XLOC_026606 | 276 coding  | noncoding | noncoding | noncoding |
| MSTRG. 30895. 1 |              | XLOC_026612 | 244 coding  | noncoding | noncoding | noncoding |
| MSTRG. 30909. 1 |              | XLOC_026617 | 251 coding  | noncoding | noncoding | noncoding |
| MSTRG. 30965. 1 | CNTNAP5      | XLOC_026632 | 533 coding  | noncoding | noncoding | noncoding |
| MSTRG. 30915. 1 |              | XLOC_026640 | 325 coding  | noncoding | noncoding | noncoding |
| MSTRG. 30924. 1 |              | XLOC_026645 | 280 coding  | noncoding | noncoding | noncoding |
| MSTRG. 31179. 1 |              | XLOC_026726 | 251 coding  | noncoding | noncoding | noncoding |
| MSTRG. 31285. 1 | UGGT1        | XLOC_026736 | 297 coding  | noncoding | noncoding | noncoding |
| MSTRG. 31235. 2 | LOC105373611 | XLOC_026752 | 283 coding  | noncoding | noncoding | noncoding |
| MSTRG. 31230. 1 |              | XLOC_026765 | 206 coding  | noncoding | noncoding | noncoding |
| MSTRG. 31233. 1 |              | XLOC_026768 | 258 coding  | noncoding | noncoding | noncoding |
| MSTRG. 31264. 1 |              | XLOC_026773 | 260 coding  | noncoding | noncoding | noncoding |
| MSTRG. 31307. 1 |              | XLOC_026784 | 370 coding  | noncoding | noncoding | noncoding |
| NR_110285. 1    | LINC01856    | XLOC_026795 | 2398 coding | noncoding | noncoding | noncoding |
| MSTRG. 31329. 1 |              | XLOC_026798 | 370 coding  | noncoding | noncoding | noncoding |
| MSTRG. 31339. 1 |              | XLOC_026808 | 248 coding  | noncoding | noncoding | noncoding |
| MSTRG. 31361. 3 | CCDC115      | XLOC_026813 | 1532 coding | noncoding | coding    | noncoding |
| XM_011510793. 2 | AMER3        | XLOC_026835 | 7278 coding | coding    | coding    | coding    |
| MSTRG. 31403. 1 |              | XLOC_026839 | 253 coding  | noncoding | noncoding | noncoding |
| MSTRG. 31421. 1 |              | XLOC_026849 | 273 coding  | coding    | noncoding | noncoding |
| NR_033885. 3    | POTEKP       | XLOC_026860 | 1530 coding | coding    | coding    | coding    |
| MSTRG. 31505. 1 | GPR39        | XLOC_026880 | 287 coding  | noncoding | noncoding | noncoding |
| MSTRG. 31541. 1 | NCKAP5       | XLOC_026900 | 236 coding  | noncoding | noncoding | noncoding |
| MSTRG. 31559. 1 | NCKAP5       | XLOC_026909 | 262 coding  | noncoding | noncoding | noncoding |
| MSTRG. 31575. 1 | NCKAP5       | XLOC_026919 | 241 coding  | coding    | noncoding | noncoding |
| MSTRG. 31576. 1 | NCKAP5       | XLOC_026920 | 264 coding  | noncoding | noncoding | noncoding |
| MSTRG. 31578. 1 | NCKAP5       | XLOC_026921 | 308 coding  | noncoding | noncoding | noncoding |
| MSTRG. 31481. 1 |              | XLOC_026925 | 387 coding  | noncoding | noncoding | noncoding |

|                  |              |             |             |           |           |           |
|------------------|--------------|-------------|-------------|-----------|-----------|-----------|
| MSTRG. 31492. 1  | LOC105373628 | XLOC_026932 | 422 coding  | noncoding | noncoding | noncoding |
| MSTRG. 31833. 1  | MGAT5        | XLOC_026943 | 226 coding  | noncoding | noncoding | noncoding |
| NR_037649. 1     | CCNT2        | XLOC_027025 | 6909 coding | coding    | coding    | coding    |
| MSTRG. 31587. 1  | MAP3K19      | XLOC_027033 | 307 coding  | noncoding | noncoding | noncoding |
| MSTRG. 31588. 1  | MAP3K19      | XLOC_027034 | 259 coding  | noncoding | noncoding | noncoding |
| MSTRG. 31911. 1  | ZRANB3       | XLOC_027050 | 271 coding  | noncoding | noncoding | noncoding |
| MSTRG. 31928. 1  | ZRANB3       | XLOC_027065 | 219 coding  | noncoding | noncoding | noncoding |
| MSTRG. 31960. 1  | R3HDM1       | XLOC_027093 | 202 coding  | noncoding | noncoding | noncoding |
| MSTRG. 31690. 1  |              | XLOC_027122 | 400 coding  | noncoding | noncoding | noncoding |
| MSTRG. 31693. 1  |              | XLOC_027123 | 316 coding  | noncoding | noncoding | noncoding |
| MSTRG. 31713. 1  |              | XLOC_027131 | 324 coding  | noncoding | noncoding | noncoding |
| MSTRG. 31760. 1  | THSD7B       | XLOC_027150 | 255 coding  | noncoding | noncoding | noncoding |
| MSTRG. 31722. 1  |              | XLOC_027157 | 277 coding  | noncoding | noncoding | noncoding |
| MSTRG. 31773. 1  | LOC105373636 | XLOC_027169 | 267 coding  | noncoding | noncoding | noncoding |
| MSTRG. 31815. 1  |              | XLOC_027197 | 428 coding  | noncoding | noncoding | noncoding |
| XM_005263655. 5  | SPOPL        | XLOC_027283 | 5614 coding | coding    | coding    | coding    |
| MSTRG. 31980. 1  |              | XLOC_027320 | 425 coding  | noncoding | noncoding | noncoding |
| MSTRG. 31996. 1  | LOC105373644 | XLOC_027336 | 281 coding  | noncoding | noncoding | noncoding |
| MSTRG. 32081. 1  | LRP1B        | XLOC_027353 | 274 coding  | noncoding | noncoding | noncoding |
| MSTRG. 32115. 1  | LRP1B        | XLOC_027371 | 273 coding  | noncoding | noncoding | noncoding |
| XR_001739132. 2  | LOC107985779 | XLOC_027376 | 9126 coding | noncoding | noncoding | noncoding |
| XR_923383. 3     | LOC105373648 | XLOC_027379 | 7129 coding | noncoding | noncoding | noncoding |
| MSTRG. 32151. 1  | LRP1B        | XLOC_027388 | 233 coding  | noncoding | noncoding | noncoding |
| MSTRG. 32032. 1  | LOC105373651 | XLOC_027391 | 233 coding  | noncoding | noncoding | noncoding |
| MSTRG. 32050. 1  |              | XLOC_027398 | 279 coding  | noncoding | noncoding | noncoding |
| MSTRG. 32689. 7  | GTDC1        | XLOC_027631 | 1332 coding | noncoding | noncoding | noncoding |
| MSTRG. 32689. 13 | GTDC1        | XLOC_027631 | 748 coding  | coding    | noncoding | noncoding |
| MSTRG. 32689. 14 | GTDC1        | XLOC_027631 | 1045 coding | coding    | noncoding | noncoding |
| MSTRG. 32689. 16 | GTDC1        | XLOC_027631 | 1036 coding | coding    | noncoding | noncoding |
| MSTRG. 32434. 25 | ZEB2-AS1     | XLOC_027633 | 3753 coding | noncoding | coding    | noncoding |
| MSTRG. 32316. 1  | TEX41        | XLOC_027641 | 289 coding  | noncoding | noncoding | noncoding |
| MSTRG. 32397. 1  |              | XLOC_027697 | 291 coding  | noncoding | noncoding | noncoding |
| MSTRG. 32418. 1  |              | XLOC_027704 | 282 coding  | noncoding | noncoding | noncoding |
| MSTRG. 33279. 6  | ORC4         | XLOC_027715 | 398 coding  | noncoding | noncoding | noncoding |
| MSTRG. 33334. 1  | MBD5         | XLOC_027765 | 266 coding  | noncoding | noncoding | noncoding |
| MSTRG. 32463. 1  |              | XLOC_027801 | 221 coding  | noncoding | noncoding | noncoding |
| MSTRG. 32467. 1  |              | XLOC_027837 | 249 coding  | noncoding | noncoding | noncoding |
| XR_244868. 1     | LOC101928526 | XLOC_027838 | 3063 coding | noncoding | coding    | noncoding |
| MSTRG. 32541. 1  | LYPD6        | XLOC_027860 | 309 coding  | noncoding | noncoding | noncoding |
| MSTRG. 32532. 1  |              | XLOC_027861 | 374 coding  | noncoding | noncoding | noncoding |
| MSTRG. 32570. 1  |              | XLOC_027865 | 298 coding  | noncoding | noncoding | noncoding |
| MSTRG. 32577. 1  |              | XLOC_027869 | 266 coding  | noncoding | noncoding | noncoding |
| MSTRG. 32619. 1  | LINC01818    | XLOC_027876 | 272 coding  | noncoding | noncoding | noncoding |

|                  |              |                   |              |           |           |           |
|------------------|--------------|-------------------|--------------|-----------|-----------|-----------|
| MSTRG. 32664. 1  |              | XLOC_027898       | 283 coding   | noncoding | noncoding | noncoding |
| MSTRG. 32679. 1  | LOC101929319 | XLOC_027900       | 321 coding   | noncoding | noncoding | noncoding |
| MSTRG. 32673. 1  |              | XLOC_027902       | 268 coding   | noncoding | noncoding | noncoding |
| NM_018151. 5     | RIF1         | XLOC_027904       | 14662 coding | coding    | coding    | coding    |
| MSTRG. 33473. 1  | RIF1         | XLOC_027906       | 278 coding   | noncoding | noncoding | noncoding |
| MSTRG. 33493. 1  | NEB          | XLOC_027919       | 313 coding   | noncoding | noncoding | noncoding |
| MSTRG. 33495. 1  | NEB          | XLOC_027921       | 853 coding   | noncoding | noncoding | noncoding |
| MSTRG. 32748. 1  |              | XLOC_027930       | 210 coding   | noncoding | noncoding | noncoding |
| MSTRG. 33441. 16 | ARL6IP6      | XLOC_027972       | 10797 coding | coding    | coding    | coding    |
| MSTRG. 33441. 21 | PRPF40A      | XLOC_027972       | 2497 coding  | coding    | coding    | coding    |
| MSTRG. 32804. 1  |              | XLOC_027983       | 296 coding   | noncoding | noncoding | noncoding |
| MSTRG. 32826. 1  |              | XLOC_027993       | 267 coding   | noncoding | noncoding | noncoding |
| MSTRG. 32831. 1  |              | XLOC_027995       | 374 coding   | coding    | noncoding | noncoding |
| MSTRG. 32837. 1  |              | XLOC_027998       | 250 coding   | coding    | noncoding | noncoding |
| MSTRG. 32864. 1  | GALNT13      | XLOC_028003       | 265 coding   | noncoding | noncoding | noncoding |
| MSTRG. 32875. 1  | GALNT13      | XLOC_028008       | 275 coding   | noncoding | noncoding | noncoding |
| MSTRG. 32877. 1  | GALNT13      | XLOC_028009       | 244 coding   | noncoding | noncoding | noncoding |
| MSTRG. 32878. 1  | GALNT13      | XLOC_028010       | 247 coding   | noncoding | noncoding | noncoding |
| MSTRG. 32851. 1  | LOC105373693 | XLOC_028016       | 307 coding   | coding    | noncoding | noncoding |
| NM_002239. 4     | KCNJ3        | XLOC_028019       | 4628 coding  | coding    | coding    | coding    |
| MSTRG. 32890. 1  |              | XLOC_028028       | 216 coding   | noncoding | noncoding | noncoding |
| MSTRG. 32900. 1  |              | XLOC_028037       | 285 coding   | noncoding | noncoding | noncoding |
| XM_017003830. 1  | GPD2         | XLOC_028104       | 5636 coding  | coding    | coding    | coding    |
| MSTRG. 33011. 1  |              | XLOC_028125       | 249 coding   | noncoding | noncoding | noncoding |
| XM_017003237. 2  | GALNT5       | XLOC_028139       | 10441 coding | coding    | coding    | coding    |
| MSTRG. 33705. 1  | CCDC148      | XLOC_028205       | 221 coding   | noncoding | noncoding | noncoding |
| MSTRG. 33714. 1  | PKP4         | XLOC_028212       | 253 coding   | noncoding | noncoding | noncoding |
| MSTRG. 33723. 1  | PKP4         | XLOC_028220       | 322 coding   | noncoding | noncoding | noncoding |
| MSTRG. 33736. 1  | PKP4-AS1     | XLOC_028232       | 207 coding   | coding    | noncoding | noncoding |
| XM_005246774. 1  |              | 7-Mar XLOC_028256 | 3484 coding  | coding    | coding    | coding    |
| MSTRG. 33677. 1  | ITGB6        | XLOC_028274       | 259 coding   | coding    | noncoding | noncoding |
| MSTRG. 33754. 1  |              | XLOC_028293       | 279 coding   | noncoding | noncoding | noncoding |
| MSTRG. 33772. 1  |              | XLOC_028336       | 200 coding   | noncoding | noncoding | noncoding |
| XM_011511513. 2  | SLC4A10      | XLOC_028344       | 5952 coding  | coding    | coding    | coding    |
| MSTRG. 33835. 1  | FAP          | XLOC_028365       | 254 coding   | noncoding | noncoding | noncoding |
| NM_001330270. 2  | GCA          | XLOC_028372       | 3736 coding  | coding    | coding    | coding    |
| MSTRG. 34074. 1  | KCNH7        | XLOC_028397       | 247 coding   | noncoding | noncoding | noncoding |
| MSTRG. 34083. 1  | KCNH7        | XLOC_028400       | 306 coding   | noncoding | noncoding | noncoding |
| MSTRG. 33957. 1  |              | XLOC_028410       | 271 coding   | noncoding | noncoding | noncoding |
| MSTRG. 33964. 1  |              | XLOC_028414       | 260 coding   | noncoding | noncoding | noncoding |
| XM_017004658. 1  | SCN2A        | XLOC_028484       | 8974 coding  | coding    | coding    | coding    |
| MSTRG. 34189. 1  |              | XLOC_028557       | 342 coding   | noncoding | noncoding | noncoding |
| MSTRG. 34191. 1  |              | XLOC_028559       | 205 coding   | noncoding | noncoding | noncoding |

|                |              |             |              |           |           |           |
|----------------|--------------|-------------|--------------|-----------|-----------|-----------|
| XM_017003309.1 | XIRP2        | XLOC_028561 | 12170 coding | coding    | noncoding | coding    |
| MSTRG.34340.1  | LRP2         | XLOC_028637 | 234 coding   | noncoding | noncoding | noncoding |
| MSTRG.34316.1  |              | XLOC_028638 | 306 coding   | noncoding | noncoding | noncoding |
| MSTRG.34367.1  | CCDC173      | XLOC_028656 | 277 coding   | coding    | noncoding | noncoding |
| MSTRG.34368.1  | CCDC173      | XLOC_028657 | 263 coding   | noncoding | noncoding | noncoding |
| MSTRG.34478.1  | UBR3         | XLOC_028668 | 286 coding   | noncoding | noncoding | noncoding |
| XM_011510658.3 | MYO3B        | XLOC_028691 | 5067 coding  | coding    | coding    | coding    |
| MSTRG.34525.1  | MYO3B        | XLOC_028692 | 283 coding   | noncoding | noncoding | noncoding |
| MSTRG.34529.1  | MYO3B        | XLOC_028695 | 273 coding   | noncoding | noncoding | noncoding |
| XM_011511159.2 | SP5          | XLOC_028703 | 3110 coding  | coding    | coding    | coding    |
| MSTRG.34511.1  | LOC101926913 | XLOC_028705 | 239 coding   | noncoding | noncoding | noncoding |
| MSTRG.34590.1  | TLK1         | XLOC_028718 | 232 coding   | noncoding | noncoding | noncoding |
| MSTRG.34613.4  | DCAF17       | XLOC_028726 | 5527 coding  | coding    | coding    | coding    |
| MSTRG.34621.1  | DCAF17       | XLOC_028734 | 290 coding   | noncoding | noncoding | noncoding |
| MSTRG.34635.1  |              | XLOC_028762 | 291 coding   | noncoding | noncoding | noncoding |
| MSTRG.34651.1  | METAP1D      | XLOC_028765 | 271 coding   | noncoding | noncoding | noncoding |
| NM_001316306.2 | ITGA6        | XLOC_028781 | 5551 coding  | coding    | coding    | coding    |
| MSTRG.34831.1  | RAPGEF4      | XLOC_028802 | 216 coding   | noncoding | noncoding | noncoding |
| MSTRG.34832.1  | RAPGEF4      | XLOC_028803 | 295 coding   | noncoding | noncoding | noncoding |
| MSTRG.34739.1  | MAP3K20      | XLOC_028818 | 261 coding   | coding    | noncoding | noncoding |
| MSTRG.34726.1  |              | XLOC_028833 | 315 coding   | noncoding | noncoding | noncoding |
| MSTRG.34732.1  |              | XLOC_028839 | 264 coding   | noncoding | noncoding | noncoding |
| MSTRG.34762.1  |              | XLOC_028865 | 261 coding   | noncoding | noncoding | noncoding |
| MSTRG.34860.3  | CIR1         | XLOC_028868 | 1724 coding  | coding    | noncoding | noncoding |
| MSTRG.34937.1  | CHN1         | XLOC_028889 | 313 coding   | noncoding | noncoding | noncoding |
| MSTRG.34941.7  | ATF2         | XLOC_028892 | 2138 coding  | coding    | coding    | noncoding |
| MSTRG.34877.1  |              | XLOC_028897 | 239 coding   | noncoding | noncoding | noncoding |
| MSTRG.34881.1  | LOC105373752 | XLOC_028900 | 265 coding   | noncoding | noncoding | noncoding |
| MSTRG.34893.1  | LOC107985962 | XLOC_028904 | 256 coding   | coding    | noncoding | noncoding |
| MSTRG.34901.1  | LOC107985830 | XLOC_028910 | 222 coding   | noncoding | noncoding | noncoding |
| XM_011511068.2 | HOXD13       | XLOC_028912 | 2638 coding  | coding    | coding    | coding    |
| XM_011511065.3 | HOXD3        | XLOC_028921 | 4374 coding  | coding    | coding    | coding    |
| MSTRG.35099.20 | NFE2L2       | XLOC_028952 | 2561 coding  | coding    | noncoding | noncoding |
| MSTRG.35044.1  | PDE11A       | XLOC_028988 | 252 coding   | noncoding | noncoding | noncoding |
| MSTRG.35053.1  | PDE11A       | XLOC_028990 | 276 coding   | noncoding | noncoding | noncoding |
| MSTRG.35078.1  | OSBPL6       | XLOC_029003 | 278 coding   | noncoding | noncoding | noncoding |
| MSTRG.35160.1  |              | XLOC_029032 | 225 coding   | noncoding | noncoding | noncoding |
| MSTRG.35162.1  |              | XLOC_029034 | 258 coding   | noncoding | noncoding | noncoding |
| MSTRG.35186.1  | ZNF385B      | XLOC_029042 | 325 coding   | noncoding | noncoding | noncoding |
| MSTRG.35198.1  |              | XLOC_029059 | 294 coding   | noncoding | noncoding | noncoding |
| MSTRG.35214.1  |              | XLOC_029069 | 261 coding   | noncoding | noncoding | noncoding |
| MSTRG.35225.1  |              | XLOC_029073 | 356 coding   | noncoding | noncoding | noncoding |
| MSTRG.35229.1  |              | XLOC_029075 | 266 coding   | noncoding | noncoding | noncoding |

|                 |              |             |              |           |           |           |
|-----------------|--------------|-------------|--------------|-----------|-----------|-----------|
| MSTRG. 35260. 1 | SCHLAP1      | XLOC_029081 | 252 coding   | noncoding | noncoding | noncoding |
| XM_005246244. 2 | UBE2E3       | XLOC_029085 | 1538 coding  | coding    | coding    | coding    |
| MSTRG. 35287. 1 |              | XLOC_029105 | 279 coding   | noncoding | noncoding | noncoding |
| MSTRG. 35319. 1 |              | XLOC_029158 | 237 coding   | coding    | noncoding | noncoding |
| MSTRG. 35358. 1 | PDE1A        | XLOC_029177 | 330 coding   | coding    | noncoding | noncoding |
| MSTRG. 35418. 1 |              | XLOC_029223 | 291 coding   | noncoding | noncoding | noncoding |
| MSTRG. 35443. 1 |              | XLOC_029231 | 322 coding   | noncoding | noncoding | noncoding |
| MSTRG. 35450. 1 | LOC105373777 | XLOC_029232 | 303 coding   | noncoding | noncoding | noncoding |
| MSTRG. 35464. 1 | LOC102724340 | XLOC_029241 | 270 coding   | coding    | noncoding | noncoding |
| MSTRG. 35525. 1 |              | XLOC_029255 | 225 coding   | noncoding | noncoding | noncoding |
| MSTRG. 35729. 1 |              | XLOC_029353 | 292 coding   | noncoding | noncoding | noncoding |
| MSTRG. 35731. 1 |              | XLOC_029354 | 473 coding   | noncoding | noncoding | noncoding |
| MSTRG. 35745. 1 |              | XLOC_029359 | 395 coding   | noncoding | noncoding | noncoding |
| MSTRG. 35743. 1 |              | XLOC_029360 | 303 coding   | noncoding | noncoding | noncoding |
| MSTRG. 35794. 1 | CALCRL       | XLOC_029367 | 344 coding   | coding    | noncoding | noncoding |
| MSTRG. 35800. 2 | TFPI         | XLOC_029371 | 851 coding   | coding    | noncoding | noncoding |
| MSTRG. 35765. 1 |              | XLOC_029379 | 248 coding   | noncoding | noncoding | noncoding |
| MSTRG. 35767. 1 |              | XLOC_029381 | 206 coding   | noncoding | noncoding | noncoding |
| XR_002959305. 1 | GULP1        | XLOC_029386 | 5485 coding  | coding    | noncoding | coding    |
| MSTRG. 35824. 1 | GULP1        | XLOC_029389 | 239 coding   | noncoding | noncoding | noncoding |
| MSTRG. 35814. 1 | LOC105373790 | XLOC_029399 | 277 coding   | noncoding | noncoding | noncoding |
| NM_000090. 3    | COL3A1       | XLOC_029403 | 5490 coding  | coding    | coding    | coding    |
| MSTRG. 35854. 1 |              | XLOC_029418 | 255 coding   | noncoding | noncoding | noncoding |
| MSTRG. 35884. 1 |              | XLOC_029448 | 600 coding   | noncoding | noncoding | noncoding |
| XM_011511356. 3 | PMS1         | XLOC_029452 | 3901 coding  | coding    | coding    | coding    |
| MSTRG. 36175. 1 | ANKAR        | XLOC_029460 | 386 coding   | noncoding | noncoding | noncoding |
| MSTRG. 36193. 1 | C2orf88      | XLOC_029466 | 262 coding   | noncoding | noncoding | noncoding |
| MSTRG. 35965. 1 | NAB1         | XLOC_029514 | 338 coding   | noncoding | noncoding | noncoding |
| MSTRG. 35941. 1 |              | XLOC_029526 | 272 coding   | noncoding | noncoding | noncoding |
| MSTRG. 36327. 2 | GLS          | XLOC_029538 | 12583 coding | coding    | coding    | coding    |
| MSTRG. 36152. 1 |              | XLOC_029553 | 265 coding   | noncoding | noncoding | noncoding |
| MSTRG. 36250. 1 |              | XLOC_029561 | 318 coding   | noncoding | noncoding | noncoding |
| MSTRG. 36332. 1 | LOC107985969 | XLOC_029605 | 432 coding   | noncoding | noncoding | noncoding |
| MSTRG. 36400. 1 |              | XLOC_029611 | 895 coding   | coding    | noncoding | noncoding |
| MSTRG. 36413. 1 |              | XLOC_029614 | 382 coding   | coding    | noncoding | noncoding |
| MSTRG. 36444. 1 | LINC01821    | XLOC_029624 | 225 coding   | noncoding | noncoding | noncoding |
| NM_001127257. 2 | SLC39A10     | XLOC_029726 | 5219 coding  | coding    | coding    | coding    |
| XM_005246689. 4 | SLC39A10     | XLOC_029726 | 5328 coding  | coding    | coding    | coding    |
| MSTRG. 36648. 1 | DNAH7        | XLOC_029743 | 213 coding   | noncoding | noncoding | noncoding |
| MSTRG. 36657. 1 | DNAH7        | XLOC_029752 | 258 coding   | coding    | noncoding | noncoding |
| MSTRG. 36658. 1 | DNAH7        | XLOC_029753 | 227 coding   | noncoding | noncoding | noncoding |
| MSTRG. 36659. 1 | DNAH7        | XLOC_029754 | 325 coding   | coding    | noncoding | noncoding |
| MSTRG. 36615. 1 | HECW2        | XLOC_029773 | 283 coding   | noncoding | noncoding | noncoding |

|                  |              |             |              |           |           |           |
|------------------|--------------|-------------|--------------|-----------|-----------|-----------|
| MSTRG. 36815. 8  | ANKRD44      | XLOC_029810 | 6043 coding  | coding    | coding    | coding    |
| MSTRG. 36815. 13 | ANKRD44      | XLOC_029810 | 7759 coding  | noncoding | coding    | coding    |
| MSTRG. 36815. 23 | ANKRD44      | XLOC_029810 | 5317 coding  | noncoding | coding    | noncoding |
| MSTRG. 36705. 2  | SF3B1        | XLOC_029814 | 8742 coding  | coding    | noncoding | noncoding |
| MSTRG. 36720. 1  | RFTN2        | XLOC_029822 | 212 coding   | noncoding | noncoding | noncoding |
| MSTRG. 36721. 1  | RFTN2        | XLOC_029823 | 232 coding   | noncoding | noncoding | noncoding |
| MSTRG. 36713. 1  |              | XLOC_029826 | 277 coding   | noncoding | noncoding | noncoding |
| MSTRG. 36714. 1  |              | XLOC_029827 | 282 coding   | coding    | noncoding | noncoding |
| MSTRG. 36743. 1  | BOLL         | XLOC_029831 | 363 coding   | noncoding | noncoding | noncoding |
| MSTRG. 36746. 1  | BOLL         | XLOC_029833 | 236 coding   | noncoding | noncoding | noncoding |
| MSTRG. 36747. 1  | BOLL         | XLOC_029834 | 209 coding   | noncoding | noncoding | noncoding |
| MSTRG. 36772. 1  | LINC01923    | XLOC_029885 | 216 coding   | noncoding | noncoding | noncoding |
| MSTRG. 36776. 1  |              | XLOC_029887 | 267 coding   | noncoding | noncoding | noncoding |
| MSTRG. 36760. 1  |              | XLOC_029893 | 288 coding   | noncoding | noncoding | noncoding |
| MSTRG. 36860. 1  |              | XLOC_029936 | 273 coding   | noncoding | noncoding | noncoding |
| MSTRG. 36863. 1  |              | XLOC_029937 | 323 coding   | noncoding | noncoding | noncoding |
| MSTRG. 36961. 1  | SGO2         | XLOC_029959 | 301 coding   | noncoding | noncoding | noncoding |
| MSTRG. 36951. 1  | AOX1         | XLOC_029961 | 573 coding   | coding    | noncoding | noncoding |
| MSTRG. 36952. 1  | AOX1         | XLOC_029962 | 249 coding   | noncoding | noncoding | noncoding |
| MSTRG. 36980. 1  |              | XLOC_029967 | 240 coding   | noncoding | coding    | noncoding |
| MSTRG. 36995. 1  | CLK1         | XLOC_029969 | 2432 coding  | coding    | noncoding | noncoding |
| MSTRG. 37114. 6  | FAM126B      | XLOC_029972 | 8621 coding  | noncoding | noncoding | noncoding |
| MSTRG. 37114. 17 | LOC105373835 | XLOC_029972 | 3696 coding  | coding    | noncoding | noncoding |
| MSTRG. 37114. 19 | LOC105373835 | XLOC_029972 | 3586 coding  | coding    | noncoding | noncoding |
| XM_017005191. 2  | CFLAR        | XLOC_029972 | 8634 coding  | coding    | coding    | coding    |
| NM_001308042. 3  | CFLAR        | XLOC_029972 | 11686 coding | coding    | coding    | coding    |
| MSTRG. 37146. 5  | NDUFB3       | XLOC_029975 | 777 coding   | coding    | coding    | noncoding |
| MSTRG. 37179. 1  | CASP8        | XLOC_029994 | 263 coding   | noncoding | noncoding | noncoding |
| XM_017004438. 1  | STRADB       | XLOC_030000 | 2128 coding  | coding    | coding    | coding    |
| MSTRG. 37003. 1  | C2CD6        | XLOC_030002 | 305 coding   | noncoding | noncoding | noncoding |
| XM_011511655. 2  | CDK15        | XLOC_030023 | 3680 coding  | coding    | coding    | coding    |
| MSTRG. 37020. 1  |              | XLOC_030034 | 445 coding   | noncoding | noncoding | noncoding |
| MSTRG. 37043. 1  | KIAA2012     | XLOC_030037 | 259 coding   | noncoding | noncoding | noncoding |
| MSTRG. 37036. 1  |              | XLOC_030045 | 272 coding   | noncoding | noncoding | noncoding |
| MSTRG. 37078. 1  |              | XLOC_030046 | 256 coding   | noncoding | noncoding | noncoding |
| MSTRG. 37090. 1  |              | XLOC_030055 | 511 coding   | noncoding | noncoding | noncoding |
| MSTRG. 37109. 1  | BMPR2        | XLOC_030062 | 239 coding   | noncoding | noncoding | noncoding |
| MSTRG. 37242. 1  | ICA1L        | XLOC_030093 | 269 coding   | noncoding | noncoding | noncoding |
| MSTRG. 37253. 1  | NBEAL1       | XLOC_030105 | 287 coding   | noncoding | noncoding | noncoding |
| NM_177538. 2     | CYP20A1      | XLOC_030107 | 10943 coding | coding    | coding    | coding    |
| XM_005246701. 4  | CYP20A1      | XLOC_030107 | 1925 coding  | coding    | coding    | coding    |
| MSTRG. 37323. 1  | ABI2         | XLOC_030112 | 234 coding   | noncoding | noncoding | noncoding |
| MSTRG. 37269. 1  |              | XLOC_030124 | 261 coding   | noncoding | noncoding | noncoding |

|                 |              |             |              |           |           |           |
|-----------------|--------------|-------------|--------------|-----------|-----------|-----------|
| MSTRG. 37274. 1 |              | XLOC_030130 | 260 coding   | coding    | noncoding | noncoding |
| MSTRG. 37440. 1 | PARD3B       | XLOC_030167 | 253 coding   | noncoding | noncoding | noncoding |
| MSTRG. 37357. 1 |              | XLOC_030183 | 411 coding   | noncoding | noncoding | noncoding |
| MSTRG. 37393. 1 |              | XLOC_030203 | 254 coding   | noncoding | noncoding | noncoding |
| MSTRG. 37506. 1 | ADAM23       | XLOC_030211 | 395 coding   | coding    | noncoding | noncoding |
| MSTRG. 37494. 1 | DYTN         | XLOC_030217 | 245 coding   | coding    | noncoding | noncoding |
| MSTRG. 37540. 1 | CPO          | XLOC_030225 | 615 coding   | noncoding | noncoding | noncoding |
| MSTRG. 37544. 1 |              | XLOC_030260 | 274 coding   | coding    | coding    | noncoding |
| MSTRG. 37547. 1 |              | XLOC_030261 | 304 coding   | noncoding | noncoding | noncoding |
| MSTRG. 37669. 1 | PTH2R        | XLOC_030299 | 257 coding   | noncoding | noncoding | noncoding |
| MSTRG. 37693. 1 | LOC101927960 | XLOC_030309 | 249 coding   | noncoding | noncoding | noncoding |
| MSTRG. 37697. 1 | LOC105373856 | XLOC_030310 | 374 coding   | noncoding | noncoding | noncoding |
| MSTRG. 37603. 1 |              | XLOC_030327 | 261 coding   | noncoding | noncoding | noncoding |
| MSTRG. 37608. 1 |              | XLOC_030330 | 357 coding   | noncoding | noncoding | noncoding |
| XM_017004112. 2 | MAP2         | XLOC_030331 | 9944 coding  | coding    | coding    | coding    |
| MSTRG. 37624. 1 | MAP2         | XLOC_030336 | 324 coding   | noncoding | noncoding | noncoding |
| XM_017003891. 1 | UNC80        | XLOC_030340 | 13820 coding | coding    | noncoding | coding    |
| MSTRG. 37632. 1 | UNC80        | XLOC_030341 | 286 coding   | noncoding | noncoding | noncoding |
| MSTRG. 37707. 1 | ACADL        | XLOC_030347 | 238 coding   | noncoding | noncoding | noncoding |
| MSTRG. 37742. 1 | CPS1         | XLOC_030354 | 288 coding   | noncoding | noncoding | noncoding |
| MSTRG. 37724. 1 |              | XLOC_030358 | 366 coding   | coding    | coding    | noncoding |
| MSTRG. 37746. 1 |              | XLOC_030360 | 261 coding   | noncoding | noncoding | noncoding |
| MSTRG. 37789. 1 | ERBB4        | XLOC_030372 | 314 coding   | noncoding | noncoding | noncoding |
| MSTRG. 37761. 1 |              | XLOC_030391 | 288 coding   | coding    | noncoding | noncoding |
| XM_017004899. 2 | SPAG16       | XLOC_030484 | 3461 coding  | noncoding | coding    | coding    |
| MSTRG. 37988. 1 | SPAG16       | XLOC_030492 | 302 coding   | noncoding | noncoding | noncoding |
| MSTRG. 37993. 1 | SPAG16       | XLOC_030493 | 324 coding   | coding    | noncoding | noncoding |
| MSTRG. 38015. 1 | SPAG16       | XLOC_030504 | 255 coding   | noncoding | noncoding | noncoding |
| MSTRG. 37970. 1 |              | XLOC_030568 | 247 coding   | noncoding | noncoding | noncoding |
| MSTRG. 38075. 1 | SNHG31       | XLOC_030580 | 260 coding   | noncoding | noncoding | noncoding |
| MSTRG. 38154. 1 | FN1          | XLOC_030599 | 283 coding   | noncoding | noncoding | noncoding |
| MSTRG. 38164. 1 | FN1          | XLOC_030607 | 326 coding   | coding    | noncoding | noncoding |
| MSTRG. 38112. 1 |              | XLOC_030629 | 329 coding   | noncoding | noncoding | noncoding |
| MSTRG. 38359. 1 | TMEM169      | XLOC_030645 | 265 coding   | noncoding | noncoding | noncoding |
| NM_000998. 5    | RPL37A       | XLOC_030676 | 2992 coding  | coding    | coding    | noncoding |
| MSTRG. 38374. 1 | LOC101928278 | XLOC_030689 | 281 coding   | noncoding | noncoding | noncoding |
| MSTRG. 38385. 1 | LOC101928278 | XLOC_030695 | 314 coding   | noncoding | noncoding | noncoding |
| MSTRG. 38387. 1 | LOC101928278 | XLOC_030696 | 202 coding   | noncoding | noncoding | noncoding |
| MSTRG. 38393. 5 | TNS1         | XLOC_030790 | 6158 coding  | coding    | coding    | coding    |
| XM_017003115. 2 | ARPC2        | XLOC_030807 | 1397 coding  | coding    | coding    | coding    |
| XM_017003771. 1 | PNKD         | XLOC_030810 | 2934 coding  | coding    | coding    | coding    |
| MSTRG. 38589. 1 | TMBIM1       | XLOC_030811 | 2383 coding  | coding    | coding    | coding    |
| MSTRG. 38594. 1 | LOC105373881 | XLOC_030812 | 277 coding   | noncoding | noncoding | noncoding |

|                 |              |             |             |           |           |           |
|-----------------|--------------|-------------|-------------|-----------|-----------|-----------|
| MSTRG. 38603. 1 | CATIP-AS2    | XLOC_030814 | 303 coding  | noncoding | noncoding | noncoding |
| MSTRG. 38612. 1 |              | XLOC_030819 | 265 coding  | noncoding | noncoding | noncoding |
| MSTRG. 38615. 1 | SLC11A1      | XLOC_030821 | 215 coding  | noncoding | noncoding | noncoding |
| MSTRG. 38564. 3 | USP37        | XLOC_030825 | 3458 coding | coding    | coding    | noncoding |
| XM_011512138. 3 | CNOT9        | XLOC_030826 | 3551 coding | coding    | coding    | coding    |
| MSTRG. 38577. 1 | CNOT9        | XLOC_030828 | 389 coding  | noncoding | noncoding | noncoding |
| MSTRG. 38624. 1 |              | XLOC_030841 | 230 coding  | noncoding | noncoding | noncoding |
| MSTRG. 38639. 1 |              | XLOC_030848 | 257 coding  | coding    | coding    | noncoding |
| MSTRG. 38691. 1 |              | XLOC_030874 | 249 coding  | noncoding | noncoding | noncoding |
| MSTRG. 38707. 1 |              | XLOC_030891 | 281 coding  | noncoding | noncoding | noncoding |
| MSTRG. 38777. 1 |              | XLOC_030897 | 271 coding  | noncoding | noncoding | noncoding |
| MSTRG. 38764. 1 | LOC105373893 | XLOC_030918 | 254 coding  | noncoding | noncoding | noncoding |
| MSTRG. 38728. 1 |              | XLOC_030924 | 270 coding  | noncoding | noncoding | noncoding |
| MSTRG. 38808. 1 |              | XLOC_030939 | 239 coding  | noncoding | noncoding | noncoding |
| MSTRG. 38844. 1 |              | XLOC_030947 | 272 coding  | noncoding | noncoding | noncoding |
| MSTRG. 38905. 1 | LOC105373903 | XLOC_030976 | 363 coding  | noncoding | noncoding | noncoding |
| MSTRG. 38907. 1 | LOC105373903 | XLOC_030977 | 237 coding  | noncoding | noncoding | noncoding |
| MSTRG. 38909. 1 |              | XLOC_030980 | 281 coding  | noncoding | noncoding | noncoding |
| MSTRG. 38966. 1 | ACSL3        | XLOC_030984 | 294 coding  | noncoding | noncoding | noncoding |
| MSTRG. 38972. 1 |              | XLOC_030989 | 258 coding  | noncoding | noncoding | noncoding |
| MSTRG. 38939. 1 |              | XLOC_030996 | 235 coding  | noncoding | coding    | noncoding |
| MSTRG. 38955. 1 |              | XLOC_031007 | 310 coding  | noncoding | noncoding | noncoding |
| MSTRG. 38989. 1 | LOC105373908 | XLOC_031040 | 280 coding  | noncoding | noncoding | noncoding |
| MSTRG. 38990. 1 |              | XLOC_031042 | 243 coding  | noncoding | noncoding | noncoding |
| MSTRG. 39051. 4 | CUL3         | XLOC_031052 | 808 coding  | coding    | noncoding | noncoding |
| MSTRG. 39047. 1 |              | XLOC_031061 | 258 coding  | noncoding | noncoding | noncoding |
| MSTRG. 39101. 1 |              | XLOC_031080 | 313 coding  | noncoding | noncoding | noncoding |
| MSTRG. 39173. 1 |              | XLOC_031115 | 239 coding  | noncoding | noncoding | noncoding |
| XR_001738982. 2 | RHBDD1       | XLOC_031126 | 5611 coding | coding    | coding    | coding    |
| XM_017005088. 1 | RHBDD1       | XLOC_031126 | 4929 coding | coding    | coding    | coding    |
| MSTRG. 39403. 1 | COL4A4       | XLOC_031152 | 241 coding  | noncoding | noncoding | noncoding |
| MSTRG. 39422. 1 | LOC654841    | XLOC_031160 | 291 coding  | noncoding | noncoding | noncoding |
| XM_005246685. 4 | MFF          | XLOC_031162 | 2033 coding | coding    | coding    | coding    |
| MSTRG. 39192. 1 |              | XLOC_031167 | 446 coding  | noncoding | noncoding | noncoding |
| MSTRG. 39304. 1 | AGFG1        | XLOC_031180 | 211 coding  | noncoding | noncoding | noncoding |
| MSTRG. 39316. 1 |              | XLOC_031200 | 264 coding  | noncoding | noncoding | noncoding |
| MSTRG. 39325. 1 |              | XLOC_031203 | 304 coding  | noncoding | noncoding | noncoding |
| MSTRG. 39340. 1 |              | XLOC_031212 | 291 coding  | noncoding | noncoding | noncoding |
| MSTRG. 39368. 1 | DNER         | XLOC_031230 | 308 coding  | noncoding | noncoding | noncoding |
| MSTRG. 39354. 1 |              | XLOC_031232 | 277 coding  | noncoding | noncoding | noncoding |
| MSTRG. 39483. 1 | FBXO36       | XLOC_031239 | 230 coding  | noncoding | noncoding | noncoding |
| MSTRG. 39489. 1 | FBXO36       | XLOC_031241 | 284 coding  | noncoding | noncoding | noncoding |
| MSTRG. 39490. 1 | FBXO36       | XLOC_031242 | 226 coding  | noncoding | noncoding | noncoding |

|                  |              |             |             |           |           |           |
|------------------|--------------|-------------|-------------|-----------|-----------|-----------|
| MSTRG. 39865. 15 | SP140        | XLOC_031254 | 8395 coding | coding    | noncoding | noncoding |
| MSTRG. 39499. 1  | LOC112268431 | XLOC_031287 | 255 coding  | noncoding | noncoding | noncoding |
| MSTRG. 39497. 1  |              | XLOC_031289 | 311 coding  | noncoding | noncoding | noncoding |
| XM_011511914. 2  | ARMC9        | XLOC_031321 | 2494 coding | noncoding | coding    | coding    |
| NM_001271466. 4  | ARMC9        | XLOC_031321 | 8122 coding | noncoding | coding    | coding    |
| MSTRG. 39574. 1  |              | XLOC_031336 | 231 coding  | noncoding | noncoding | noncoding |
| MSTRG. 39603. 1  |              | XLOC_031350 | 487 coding  | noncoding | noncoding | noncoding |
| MSTRG. 39608. 1  |              | XLOC_031351 | 729 coding  | noncoding | noncoding | noncoding |
| MSTRG. 39660. 1  | DIS3L2       | XLOC_031364 | 255 coding  | noncoding | noncoding | noncoding |
| MSTRG. 39667. 1  | DIS3L2       | XLOC_031371 | 205 coding  | noncoding | noncoding | noncoding |
| MSTRG. 39673. 1  | DIS3L2       | XLOC_031377 | 571 coding  | noncoding | noncoding | noncoding |
| MSTRG. 39709. 1  | GIGYF2       | XLOC_031401 | 285 coding  | noncoding | noncoding | noncoding |
| XM_017004083. 2  | SNORC        | XLOC_031403 | 3572 coding | coding    | coding    | coding    |
| MSTRG. 39720. 1  | NGEF         | XLOC_031405 | 287 coding  | noncoding | noncoding | noncoding |
| MSTRG. 39722. 1  | NGEF         | XLOC_031407 | 283 coding  | noncoding | noncoding | noncoding |
| MSTRG. 39655. 1  |              | XLOC_031410 | 472 coding  | noncoding | noncoding | noncoding |
| NM_005383. 2     | NEU2         | XLOC_031411 | 1143 coding | coding    | coding    | coding    |
| MSTRG. 39727. 1  |              | XLOC_031437 | 244 coding  | coding    | noncoding | noncoding |
| MSTRG. 39798. 1  |              | XLOC_031463 | 307 coding  | noncoding | noncoding | noncoding |
| MSTRG. 39822. 1  |              | XLOC_031477 | 229 coding  | noncoding | noncoding | noncoding |
| MSTRG. 39829. 1  |              | XLOC_031488 | 306 coding  | noncoding | noncoding | noncoding |
| MSTRG. 39835. 1  |              | XLOC_031493 | 252 coding  | noncoding | noncoding | noncoding |
| MSTRG. 39839. 1  |              | XLOC_031496 | 295 coding  | noncoding | noncoding | noncoding |
| MSTRG. 40028. 1  | AGAP1        | XLOC_031499 | 264 coding  | noncoding | noncoding | noncoding |
| MSTRG. 40038. 1  | AGAP1        | XLOC_031502 | 300 coding  | noncoding | noncoding | noncoding |
| MSTRG. 40041. 1  | AGAP1        | XLOC_031504 | 317 coding  | noncoding | noncoding | noncoding |
| MSTRG. 40050. 1  | AGAP1        | XLOC_031508 | 220 coding  | noncoding | noncoding | noncoding |
| MSTRG. 40063. 1  | AGAP1        | XLOC_031520 | 286 coding  | noncoding | noncoding | noncoding |
| MSTRG. 40094. 1  | AGAP1        | XLOC_031527 | 213 coding  | noncoding | noncoding | noncoding |
| MSTRG. 39928. 1  |              | XLOC_031528 | 290 coding  | noncoding | noncoding | noncoding |
| MSTRG. 39921. 1  |              | XLOC_031529 | 407 coding  | noncoding | noncoding | noncoding |
| NM_020311. 3     | ACKR3        | XLOC_031536 | 2015 coding | coding    | coding    | coding    |
| MSTRG. 40014. 1  |              | XLOC_031586 | 251 coding  | noncoding | noncoding | noncoding |
| MSTRG. 40108. 1  | MLPH         | XLOC_031603 | 253 coding  | noncoding | noncoding | noncoding |
| MSTRG. 40110. 1  | MLPH         | XLOC_031604 | 317 coding  | noncoding | noncoding | noncoding |
| MSTRG. 40127. 1  |              | XLOC_031606 | 376 coding  | noncoding | noncoding | noncoding |
| XM_017003153. 2  | RAMP1        | XLOC_031635 | 1299 coding | coding    | coding    | coding    |
| NR_103500. 1     | UBE2F        | XLOC_031639 | 2305 coding | coding    | noncoding | noncoding |
| NM_194312. 4     | ESPNL        | XLOC_031648 | 4653 coding | coding    | coding    | coding    |
| XM_011510947. 2  | TRAF3IP1     | XLOC_031671 | 4320 coding | coding    | coding    | coding    |
| MSTRG. 40268. 1  |              | XLOC_031677 | 317 coding  | noncoding | noncoding | noncoding |
| MSTRG. 40291. 1  |              | XLOC_031695 | 238 coding  | noncoding | noncoding | noncoding |
| MSTRG. 40320. 1  |              | XLOC_031729 | 260 coding  | noncoding | noncoding | noncoding |

|                |              |             |             |           |           |           |
|----------------|--------------|-------------|-------------|-----------|-----------|-----------|
| XM_024453115.1 | CROCC2       | XLOC_031783 | 7329 coding | coding    | coding    | coding    |
| MSTRG.40570.15 | LOC101927509 | XLOC_031797 | 1610 coding | coding    | coding    | coding    |
| NM_001321035.1 | SEPTIN2      | XLOC_031797 | 3416 coding | coding    | coding    | coding    |
| NM_001282973.1 | SEPTIN2      | XLOC_031797 | 3673 coding | coding    | coding    | coding    |
| MSTRG.40491.1  | BOK-AS1      | XLOC_031805 | 309 coding  | noncoding | noncoding | noncoding |
| NM_032329.6    | ING5         | XLOC_031815 | 5197 coding | coding    | coding    | coding    |
| MSTRG.40613.1  | ING5         | XLOC_031817 | 242 coding  | noncoding | noncoding | noncoding |
| MSTRG.20899.1  |              | XLOC_031860 | 331 coding  | noncoding | noncoding | noncoding |
| MSTRG.20948.1  | PXDN         | XLOC_031917 | 228 coding  | noncoding | noncoding | noncoding |
| XM_011510320.3 | MYT1L        | XLOC_031920 | 7552 coding | coding    | coding    | coding    |
| MSTRG.20971.1  |              | XLOC_031936 | 299 coding  | noncoding | noncoding | noncoding |
| NR_148534.1    | RNASEH1      | XLOC_031963 | 3006 coding | coding    | coding    | coding    |
| MSTRG.21121.1  |              | XLOC_031968 | 282 coding  | noncoding | noncoding | noncoding |
| MSTRG.21131.1  |              | XLOC_031976 | 273 coding  | noncoding | noncoding | noncoding |
| MSTRG.21153.1  |              | XLOC_031983 | 302 coding  | noncoding | noncoding | noncoding |
| MSTRG.21160.1  |              | XLOC_031986 | 277 coding  | noncoding | noncoding | noncoding |
| MSTRG.21179.1  |              | XLOC_031993 | 294 coding  | noncoding | noncoding | noncoding |
| MSTRG.21184.1  |              | XLOC_031996 | 264 coding  | noncoding | noncoding | noncoding |
| MSTRG.21197.1  |              | XLOC_032004 | 271 coding  | noncoding | noncoding | noncoding |
| MSTRG.21499.1  | LINC00487    | XLOC_032037 | 284 coding  | noncoding | noncoding | noncoding |
| MSTRG.21294.1  |              | XLOC_032213 | 305 coding  | noncoding | noncoding | noncoding |
| NM_001348738.2 | KIDINS220    | XLOC_032214 | 8742 coding | coding    | coding    | coding    |
| MSTRG.21320.1  | KIDINS220    | XLOC_032228 | 319 coding  | noncoding | noncoding | noncoding |
| NR_135605.2    | MBOAT2       | XLOC_032231 | 7450 coding | coding    | coding    | coding    |
| NR_135598.1    | MBOAT2       | XLOC_032231 | 7740 coding | coding    | coding    | coding    |
| MSTRG.21336.1  |              | XLOC_032252 | 413 coding  | noncoding | noncoding | noncoding |
| MSTRG.21414.1  | ASAP2        | XLOC_032261 | 253 coding  | noncoding | noncoding | noncoding |
| MSTRG.21363.1  |              | XLOC_032280 | 294 coding  | noncoding | noncoding | noncoding |
| MSTRG.21375.1  |              | XLOC_032289 | 300 coding  | noncoding | noncoding | noncoding |
| MSTRG.21395.1  | LOC112268412 | XLOC_032299 | 258 coding  | noncoding | noncoding | noncoding |
| XR_001738957.1 | NOL10        | XLOC_032330 | 2732 coding | coding    | coding    | coding    |
| MSTRG.21492.1  | NOL10        | XLOC_032334 | 397 coding  | noncoding | noncoding | noncoding |
| MSTRG.21649.1  |              | XLOC_032374 | 288 coding  | noncoding | noncoding | noncoding |
| MSTRG.21655.1  | LOC105373429 | XLOC_032376 | 278 coding  | noncoding | noncoding | noncoding |
| MSTRG.21673.1  | GREB1        | XLOC_032380 | 266 coding  | noncoding | noncoding | noncoding |
| MSTRG.21679.1  | GREB1        | XLOC_032385 | 259 coding  | coding    | noncoding | noncoding |
| MSTRG.21700.1  |              | XLOC_032396 | 279 coding  | noncoding | noncoding | noncoding |
| MSTRG.21844.1  | MIR3681HG    | XLOC_032405 | 281 coding  | noncoding | noncoding | noncoding |
| MSTRG.21864.1  | MIR3681HG    | XLOC_032417 | 315 coding  | noncoding | coding    | noncoding |
| MSTRG.21746.1  | LOC105373436 | XLOC_032442 | 305 coding  | noncoding | noncoding | noncoding |
| MSTRG.21772.1  | LOC105373438 | XLOC_032458 | 356 coding  | noncoding | noncoding | noncoding |
| MSTRG.21798.1  | LINC00276    | XLOC_032468 | 253 coding  | coding    | noncoding | noncoding |
| MSTRG.21802.1  |              | XLOC_032474 | 280 coding  | noncoding | noncoding | noncoding |

|                 |              |             |              |           |           |           |
|-----------------|--------------|-------------|--------------|-----------|-----------|-----------|
| MSTRG. 21983. 1 | NBAS         | XLOC_032484 | 214 coding   | noncoding | noncoding | noncoding |
| MSTRG. 21896. 1 |              | XLOC_032513 | 246 coding   | noncoding | noncoding | noncoding |
| MSTRG. 21920. 1 |              | XLOC_032532 | 205 coding   | noncoding | noncoding | noncoding |
| MSTRG. 21921. 1 |              | XLOC_032533 | 469 coding   | noncoding | noncoding | noncoding |
| MSTRG. 22098. 1 |              | XLOC_032619 | 311 coding   | noncoding | noncoding | noncoding |
| MSTRG. 22120. 1 | LOC105373454 | XLOC_032627 | 252 coding   | noncoding | noncoding | noncoding |
| MSTRG. 22374. 1 |              | XLOC_032817 | 225 coding   | noncoding | noncoding | noncoding |
| MSTRG. 22537. 1 | WDR35        | XLOC_032852 | 236 coding   | noncoding | noncoding | noncoding |
| MSTRG. 22433. 1 |              | XLOC_032865 | 244 coding   | noncoding | noncoding | noncoding |
| NM_001006946. 1 | SDC1         | XLOC_032869 | 3293 coding  | coding    | coding    | coding    |
| NM_001282791. 2 | PUM2         | XLOC_032870 | 6003 coding  | coding    | coding    | coding    |
| NM_001282790. 2 | PUM2         | XLOC_032870 | 5878 coding  | coding    | coding    | coding    |
| NM_001282752. 2 | PUM2         | XLOC_032870 | 6252 coding  | coding    | coding    | coding    |
| MSTRG. 22572. 1 |              | XLOC_032913 | 431 coding   | noncoding | noncoding | noncoding |
| NM_000384. 3    | APOB         | XLOC_032920 | 14121 coding | coding    | noncoding | coding    |
| MSTRG. 22619. 1 |              | XLOC_032923 | 310 coding   | noncoding | noncoding | noncoding |
| MSTRG. 22615. 1 |              | XLOC_032925 | 526 coding   | noncoding | noncoding | noncoding |
| MSTRG. 22629. 1 | LOC105374318 | XLOC_032933 | 256 coding   | noncoding | noncoding | noncoding |
| MSTRG. 22642. 1 |              | XLOC_032946 | 257 coding   | noncoding | noncoding | noncoding |
| MSTRG. 23076. 1 | ATAD2B       | XLOC_033019 | 290 coding   | noncoding | noncoding | noncoding |
| MSTRG. 23082. 1 | UBXN2A       | XLOC_033024 | 275 coding   | noncoding | noncoding | noncoding |
| MSTRG. 22905. 1 |              | XLOC_033028 | 705 coding   | noncoding | noncoding | noncoding |
| MSTRG. 22914. 1 |              | XLOC_033039 | 288 coding   | noncoding | coding    | noncoding |
| MSTRG. 22933. 1 | LOC105374329 | XLOC_033064 | 223 coding   | noncoding | noncoding | noncoding |
| MSTRG. 23291. 1 |              | XLOC_033071 | 352 coding   | noncoding | noncoding | noncoding |
| MSTRG. 22962. 1 |              | XLOC_033088 | 314 coding   | noncoding | noncoding | noncoding |
| MSTRG. 22964. 1 |              | XLOC_033090 | 246 coding   | noncoding | noncoding | noncoding |
| MSTRG. 22999. 1 | DNAJC27      | XLOC_033092 | 291 coding   | noncoding | noncoding | noncoding |
| NM_001035256. 2 | POMC         | XLOC_033103 | 1456 coding  | coding    | coding    | coding    |
| MSTRG. 23163. 1 | DTNB         | XLOC_033119 | 234 coding   | noncoding | noncoding | noncoding |
| MSTRG. 23165. 1 | DTNB         | XLOC_033120 | 243 coding   | noncoding | noncoding | noncoding |
| MSTRG. 23171. 1 | DTNB         | XLOC_033126 | 281 coding   | noncoding | noncoding | noncoding |
| MSTRG. 23112. 1 |              | XLOC_033133 | 232 coding   | noncoding | noncoding | noncoding |
| MSTRG. 23114. 1 |              | XLOC_033148 | 304 coding   | noncoding | noncoding | noncoding |
| MSTRG. 23120. 1 |              | XLOC_033153 | 218 coding   | noncoding | noncoding | noncoding |
| MSTRG. 23194. 1 |              | XLOC_033161 | 259 coding   | noncoding | noncoding | noncoding |
| XM_017003331. 1 | CIB4         | XLOC_033179 | 950 coding   | noncoding | coding    | coding    |
| MSTRG. 23296. 1 |              | XLOC_033182 | 213 coding   | noncoding | coding    | noncoding |
| MSTRG. 23333. 1 |              | XLOC_033189 | 288 coding   | noncoding | noncoding | noncoding |
| NM_001134693. 2 | OST4         | XLOC_033203 | 442 coding   | coding    | coding    | noncoding |
| MSTRG. 23363. 1 | KHK          | XLOC_033207 | 208 coding   | noncoding | coding    | noncoding |
| XM_011533102. 2 | SLC30A3      | XLOC_033220 | 2090 coding  | coding    | coding    | coding    |
| MSTRG. 23414. 1 | GTF3C2       | XLOC_033226 | 359 coding   | noncoding | noncoding | noncoding |

|                 |              |             |              |           |           |           |
|-----------------|--------------|-------------|--------------|-----------|-----------|-----------|
| MSTRG. 23416. 1 | GTF3C2       | XLOC_033228 | 294 coding   | noncoding | noncoding | noncoding |
| NM_144631. 6    | ZNF513       | XLOC_033232 | 2144 coding  | coding    | coding    | coding    |
| NR_002201. 1    | FTH1P3       | XLOC_033234 | 954 coding   | coding    | coding    | noncoding |
| MSTRG. 23444. 3 | ZNF512       | XLOC_033241 | 3441 coding  | coding    | noncoding | noncoding |
| MSTRG. 23428. 1 |              | XLOC_033247 | 281 coding   | noncoding | noncoding | noncoding |
| MSTRG. 23611. 5 | BABAM2-AS1   | XLOC_033252 | 3141 coding  | coding    | coding    | noncoding |
| MSTRG. 23497. 1 | PLB1         | XLOC_033277 | 254 coding   | noncoding | noncoding | noncoding |
| MSTRG. 23502. 1 | PLB1         | XLOC_033280 | 296 coding   | noncoding | noncoding | noncoding |
| MSTRG. 23482. 1 |              | XLOC_033286 | 261 coding   | noncoding | noncoding | noncoding |
| XR_939886. 2    | LOC112267877 | XLOC_033288 | 3732 coding  | noncoding | coding    | noncoding |
| MSTRG. 23509. 1 |              | XLOC_033302 | 300 coding   | noncoding | noncoding | noncoding |
| MSTRG. 23572. 2 | LBH          | XLOC_033339 | 5172 coding  | coding    | coding    | noncoding |
| MSTRG. 23604. 1 |              | XLOC_033344 | 416 coding   | noncoding | coding    | noncoding |
| XR_001739074. 1 | CAPN13       | XLOC_033349 | 4085 coding  | coding    | coding    | coding    |
| MSTRG. 23797. 1 | GALNT14      | XLOC_033356 | 308 coding   | noncoding | noncoding | noncoding |
| MSTRG. 23747. 1 | CAPN14       | XLOC_033364 | 202 coding   | noncoding | noncoding | noncoding |
| MSTRG. 23738. 1 |              | XLOC_033368 | 290 coding   | noncoding | noncoding | noncoding |
| XM_011533069. 2 | SRD5A2       | XLOC_033374 | 5261 coding  | coding    | coding    | coding    |
| MSTRG. 23853. 1 | MEMO1        | XLOC_033393 | 282 coding   | noncoding | noncoding | noncoding |
| MSTRG. 23855. 1 | MEMO1        | XLOC_033395 | 301 coding   | noncoding | noncoding | noncoding |
| MSTRG. 23856. 1 | MEMO1        | XLOC_033396 | 568 coding   | noncoding | noncoding | noncoding |
| MSTRG. 23866. 1 | MEMO1        | XLOC_033406 | 303 coding   | noncoding | noncoding | noncoding |
| MSTRG. 23868. 1 | MEMO1        | XLOC_033408 | 280 coding   | noncoding | noncoding | noncoding |
| NM_001321209. 2 | DPY30        | XLOC_033412 | 688 coding   | coding    | noncoding | coding    |
| MSTRG. 23877. 1 | DPY30        | XLOC_033413 | 279 coding   | noncoding | noncoding | noncoding |
| MSTRG. 24020. 8 | BIRC6        | XLOC_033420 | 15513 coding | coding    | coding    | coding    |
| MSTRG. 23903. 1 | LINC00486    | XLOC_033427 | 429 coding   | noncoding | noncoding | noncoding |
| MSTRG. 23908. 1 | LINC00486    | XLOC_033430 | 483 coding   | noncoding | noncoding | noncoding |
| MSTRG. 23915. 4 | LTBP1        | XLOC_033434 | 4554 coding  | coding    | coding    | noncoding |
| MSTRG. 23965. 1 | RASGRP3      | XLOC_033436 | 260 coding   | noncoding | noncoding | noncoding |
| MSTRG. 23968. 3 | RASGRP3      | XLOC_033438 | 2243 coding  | coding    | noncoding | noncoding |
| MSTRG. 23950. 1 |              | XLOC_033465 | 246 coding   | noncoding | noncoding | noncoding |
| MSTRG. 23952. 1 |              | XLOC_033469 | 225 coding   | noncoding | noncoding | noncoding |
| MSTRG. 23957. 1 |              | XLOC_033475 | 301 coding   | noncoding | noncoding | noncoding |
| MSTRG. 23980. 1 |              | XLOC_033480 | 259 coding   | noncoding | noncoding | noncoding |
| MSTRG. 23983. 1 |              | XLOC_033489 | 310 coding   | noncoding | noncoding | noncoding |
| MSTRG. 23998. 1 |              | XLOC_033496 | 258 coding   | noncoding | noncoding | noncoding |
| MSTRG. 24062. 1 |              | XLOC_033545 | 282 coding   | noncoding | noncoding | noncoding |
| MSTRG. 24157. 1 | HEATR5B      | XLOC_033564 | 258 coding   | noncoding | noncoding | noncoding |
| MSTRG. 24158. 1 | HEATR5B      | XLOC_033565 | 282 coding   | noncoding | noncoding | noncoding |
| MSTRG. 24458. 1 | LOC105374464 | XLOC_033593 | 310 coding   | noncoding | noncoding | noncoding |
| MSTRG. 24552. 1 | LINC00211    | XLOC_033640 | 315 coding   | noncoding | noncoding | noncoding |
| MSTRG. 24180. 1 |              | XLOC_033681 | 235 coding   | noncoding | noncoding | noncoding |

|                 |              |             |              |           |           |           |
|-----------------|--------------|-------------|--------------|-----------|-----------|-----------|
| MSTRG. 24205. 1 |              | XLOC_033702 | 215 coding   | noncoding | noncoding | noncoding |
| MSTRG. 24236. 1 | DHX57        | XLOC_033707 | 243 coding   | noncoding | noncoding | noncoding |
| MSTRG. 24308. 1 | CDKL4        | XLOC_033736 | 232 coding   | noncoding | noncoding | noncoding |
| MSTRG. 24323. 1 | MAP4K3       | XLOC_033738 | 242 coding   | noncoding | noncoding | noncoding |
| MSTRG. 24335. 1 | MAP4K3       | XLOC_033748 | 226 coding   | noncoding | noncoding | noncoding |
| MSTRG. 24275. 1 |              | XLOC_033769 | 293 coding   | coding    | noncoding | noncoding |
| MSTRG. 24278. 1 |              | XLOC_033771 | 278 coding   | noncoding | noncoding | noncoding |
| MSTRG. 24761. 1 | SLC8A1-AS1   | XLOC_033776 | 204 coding   | noncoding | noncoding | noncoding |
| MSTRG. 24762. 1 | SLC8A1-AS1   | XLOC_033777 | 217 coding   | noncoding | noncoding | noncoding |
| MSTRG. 24360. 1 |              | XLOC_033788 | 319 coding   | noncoding | noncoding | noncoding |
| XR_939995. 2    | LOC105374497 | XLOC_033789 | 2076 coding  | noncoding | noncoding | noncoding |
| MSTRG. 24373. 1 | LOC105374497 | XLOC_033790 | 225 coding   | noncoding | noncoding | noncoding |
| XR_939997. 2    | LOC105374506 | XLOC_033807 | 11601 coding | noncoding | coding    | noncoding |
| MSTRG. 24398. 1 |              | XLOC_033818 | 311 coding   | noncoding | noncoding | noncoding |
| MSTRG. 24408. 1 |              | XLOC_033825 | 234 coding   | noncoding | noncoding | noncoding |
| MSTRG. 24656. 1 | MTA3         | XLOC_033845 | 235 coding   | noncoding | noncoding | noncoding |
| MSTRG. 24658. 1 | MTA3         | XLOC_033847 | 306 coding   | noncoding | noncoding | noncoding |
| MSTRG. 24662. 1 | MTA3         | XLOC_033849 | 220 coding   | noncoding | noncoding | noncoding |
| MSTRG. 24863. 1 | THADA        | XLOC_033899 | 281 coding   | noncoding | noncoding | noncoding |
| MSTRG. 24879. 1 | THADA        | XLOC_033915 | 280 coding   | noncoding | noncoding | noncoding |
| MSTRG. 24706. 1 | PLEKHH2      | XLOC_033930 | 281 coding   | noncoding | noncoding | noncoding |
| MSTRG. 24739. 1 | LRPPRC       | XLOC_033946 | 235 coding   | noncoding | noncoding | noncoding |
| MSTRG. 24722. 1 |              | XLOC_033950 | 267 coding   | noncoding | noncoding | noncoding |
| MSTRG. 25103. 1 | SLC3A1       | XLOC_033956 | 227 coding   | noncoding | coding    | noncoding |
| XR_002959310. 1 | SRBD1        | XLOC_033981 | 3655 coding  | coding    | coding    | coding    |
| MSTRG. 24895. 1 |              | XLOC_034023 | 225 coding   | noncoding | noncoding | noncoding |
| MSTRG. 25031. 9 | RHOQ         | XLOC_034052 | 9605 coding  | noncoding | coding    | noncoding |
| MSTRG. 25047. 1 | STPG4        | XLOC_034077 | 287 coding   | noncoding | noncoding | noncoding |
| MSTRG. 25010. 1 | EPCAM-DT     | XLOC_034085 | 312 coding   | noncoding | noncoding | noncoding |
| MSTRG. 25016. 1 | EPCAM-DT     | XLOC_034087 | 441 coding   | noncoding | noncoding | noncoding |
| MSTRG. 25001. 1 |              | XLOC_034088 | 249 coding   | noncoding | noncoding | noncoding |
| MSTRG. 25022. 1 |              | XLOC_034091 | 314 coding   | noncoding | noncoding | noncoding |
| MSTRG. 25166. 1 |              | XLOC_034133 | 273 coding   | noncoding | noncoding | noncoding |
| MSTRG. 25179. 8 | FOXP2        | XLOC_034138 | 10798 coding | coding    | noncoding | noncoding |
| XM_011532736. 2 | FSHR         | XLOC_034157 | 12527 coding | coding    | coding    | coding    |
| MSTRG. 25428. 1 | NRXN1        | XLOC_034185 | 303 coding   | noncoding | noncoding | noncoding |
| MSTRG. 25435. 1 | NRXN1        | XLOC_034188 | 260 coding   | noncoding | noncoding | noncoding |
| MSTRG. 25318. 1 | LOC730100    | XLOC_034201 | 220 coding   | noncoding | noncoding | noncoding |
| MSTRG. 25323. 1 | LOC730100    | XLOC_034204 | 373 coding   | noncoding | noncoding | noncoding |
| MSTRG. 25309. 1 |              | XLOC_034222 | 244 coding   | noncoding | noncoding | noncoding |
| MSTRG. 25633. 1 | ASB3         | XLOC_034258 | 221 coding   | noncoding | noncoding | noncoding |
| MSTRG. 25547. 1 | EML6         | XLOC_034306 | 248 coding   | noncoding | noncoding | noncoding |
| NM_001353781. 2 | CLHC1        | XLOC_034336 | 5630 coding  | coding    | noncoding | coding    |

|                  |              |             |              |           |           |           |
|------------------|--------------|-------------|--------------|-----------|-----------|-----------|
| MSTRG. 25592. 1  | CLHC1        | XLOC_034339 | 214 coding   | noncoding | noncoding | noncoding |
| MSTRG. 25613. 1  |              | XLOC_034360 | 211 coding   | noncoding | noncoding | noncoding |
| NR_125368. 1     | LOC100129434 | XLOC_034378 | 2863 coding  | coding    | coding    | noncoding |
| MSTRG. 25722. 1  |              | XLOC_034384 | 252 coding   | noncoding | noncoding | noncoding |
| MSTRG. 25728. 1  |              | XLOC_034387 | 263 coding   | noncoding | noncoding | noncoding |
| MSTRG. 25725. 1  |              | XLOC_034392 | 240 coding   | noncoding | noncoding | noncoding |
| XR_001739483. 1  | LOC105377632 | XLOC_034394 | 11548 coding | noncoding | noncoding | noncoding |
| MSTRG. 26004. 1  | LOC105377632 | XLOC_034397 | 292 coding   | noncoding | noncoding | noncoding |
| MSTRG. 26024. 1  | LOC105377632 | XLOC_034403 | 223 coding   | noncoding | noncoding | noncoding |
| MSTRG. 26041. 1  | LOC105377632 | XLOC_034407 | 306 coding   | noncoding | noncoding | noncoding |
| MSTRG. 26116. 1  | VRK2         | XLOC_034416 | 302 coding   | noncoding | noncoding | noncoding |
| MSTRG. 25764. 1  | LINC01122    | XLOC_034431 | 647 coding   | noncoding | noncoding | noncoding |
| MSTRG. 25790. 1  | LOC105374754 | XLOC_034444 | 259 coding   | noncoding | noncoding | noncoding |
| MSTRG. 25776. 1  |              | XLOC_034446 | 251 coding   | noncoding | noncoding | noncoding |
| MSTRG. 25811. 1  |              | XLOC_034462 | 319 coding   | noncoding | noncoding | noncoding |
| MSTRG. 25818. 1  |              | XLOC_034465 | 263 coding   | noncoding | noncoding | noncoding |
| MSTRG. 25847. 1  |              | XLOC_034491 | 225 coding   | noncoding | noncoding | noncoding |
| MSTRG. 25854. 1  |              | XLOC_034495 | 253 coding   | noncoding | noncoding | noncoding |
| MSTRG. 25859. 1  |              | XLOC_034496 | 273 coding   | noncoding | noncoding | noncoding |
| MSTRG. 25873. 1  |              | XLOC_034498 | 235 coding   | noncoding | noncoding | noncoding |
| MSTRG. 26170. 6  | USP34        | XLOC_034517 | 481 coding   | noncoding | noncoding | noncoding |
| MSTRG. 25912. 1  |              | XLOC_034547 | 277 coding   | noncoding | noncoding | noncoding |
| MSTRG. 25916. 1  |              | XLOC_034549 | 230 coding   | noncoding | noncoding | noncoding |
| MSTRG. 25917. 1  |              | XLOC_034550 | 312 coding   | noncoding | noncoding | noncoding |
| MSTRG. 25925. 1  | LOC105374760 | XLOC_034554 | 215 coding   | noncoding | noncoding | noncoding |
| MSTRG. 25946. 1  | LOC105374761 | XLOC_034572 | 273 coding   | noncoding | noncoding | noncoding |
| MSTRG. 25982. 1  |              | XLOC_034577 | 273 coding   | noncoding | noncoding | noncoding |
| MSTRG. 25972. 1  |              | XLOC_034587 | 298 coding   | coding    | noncoding | noncoding |
| MSTRG. 25974. 1  |              | XLOC_034588 | 300 coding   | noncoding | noncoding | noncoding |
| MSTRG. 26584. 1  |              | XLOC_034654 | 542 coding   | noncoding | noncoding | noncoding |
| MSTRG. 26609. 26 |              | XLOC_034662 | 4422 coding  | noncoding | coding    | noncoding |
| MSTRG. 26307. 1  |              | XLOC_034709 | 276 coding   | noncoding | noncoding | noncoding |
| NM_181784. 3     | SPRED2       | XLOC_034716 | 4519 coding  | coding    | coding    | coding    |
| XR_940187. 3     | LOC105374780 | XLOC_034718 | 3637 coding  | noncoding | coding    | noncoding |
| MSTRG. 26341. 1  | LOC105374781 | XLOC_034719 | 245 coding   | noncoding | noncoding | noncoding |
| MSTRG. 26348. 1  |              | XLOC_034723 | 227 coding   | noncoding | noncoding | noncoding |
| MSTRG. 26349. 1  |              | XLOC_034724 | 601 coding   | noncoding | noncoding | noncoding |
| MSTRG. 26350. 1  |              | XLOC_034725 | 501 coding   | noncoding | noncoding | noncoding |
| MSTRG. 26390. 1  |              | XLOC_034737 | 325 coding   | noncoding | noncoding | noncoding |
| MSTRG. 26451. 1  |              | XLOC_034754 | 239 coding   | noncoding | noncoding | noncoding |
| MSTRG. 26477. 1  | LINC01828    | XLOC_034763 | 263 coding   | noncoding | noncoding | noncoding |
| MSTRG. 26514. 1  |              | XLOC_034779 | 255 coding   | coding    | noncoding | noncoding |
| MSTRG. 26543. 1  |              | XLOC_034792 | 248 coding   | noncoding | noncoding | noncoding |

|                 |              |             |             |           |           |           |
|-----------------|--------------|-------------|-------------|-----------|-----------|-----------|
| MSTRG. 26773. 1 | GFPT1        | XLOC_034841 | 321 coding  | noncoding | noncoding | noncoding |
| XM_017003808. 2 | NFU1         | XLOC_034843 | 1549 coding | coding    | coding    | coding    |
| MSTRG. 26970. 1 | NFU1         | XLOC_034844 | 265 coding  | noncoding | noncoding | noncoding |
| MSTRG. 26978. 1 | AAK1         | XLOC_034849 | 260 coding  | noncoding | noncoding | noncoding |
| MSTRG. 27001. 1 | AAK1         | XLOC_034870 | 559 coding  | noncoding | noncoding | noncoding |
| NM_001351518. 1 | TIA1         | XLOC_034914 | 1160 coding | coding    | coding    | coding    |
| NM_001351519. 2 | TIA1         | XLOC_034914 | 802 coding  | coding    | coding    | coding    |
| MSTRG. 26867. 1 |              | XLOC_034921 | 337 coding  | noncoding | noncoding | noncoding |
| MSTRG. 26874. 1 |              | XLOC_034922 | 321 coding  | noncoding | noncoding | noncoding |
| MSTRG. 26879. 1 |              | XLOC_034924 | 261 coding  | noncoding | noncoding | noncoding |
| MSTRG. 26907. 1 | TGFA         | XLOC_034928 | 315 coding  | noncoding | noncoding | noncoding |
| MSTRG. 26930. 1 |              | XLOC_034955 | 217 coding  | coding    | noncoding | noncoding |
| MSTRG. 26936. 1 | OR7E91P      | XLOC_034956 | 269 coding  | coding    | noncoding | noncoding |
| MSTRG. 26940. 1 |              | XLOC_034958 | 223 coding  | noncoding | noncoding | noncoding |
| MSTRG. 27059. 1 |              | XLOC_034982 | 326 coding  | noncoding | noncoding | noncoding |
| MSTRG. 27092. 1 |              | XLOC_035039 | 236 coding  | noncoding | noncoding | noncoding |
| NM_001965. 4    | EGR4         | XLOC_035047 | 2220 coding | coding    | coding    | coding    |
| MSTRG. 27151. 1 | C2orf78      | XLOC_035072 | 360 coding  | noncoding | noncoding | noncoding |
| NM_001035505. 2 | BOLA3        | XLOC_035076 | 466 coding  | noncoding | noncoding | noncoding |
| NM_001317112. 2 | MOB1A        | XLOC_035079 | 4732 coding | coding    | noncoding | coding    |
| MSTRG. 27326. 1 |              | XLOC_035083 | 240 coding  | noncoding | noncoding | noncoding |
| MSTRG. 27271. 4 | INO80B-WBP1  | XLOC_035090 | 3265 coding | coding    | coding    | coding    |
| MSTRG. 27271. 7 | INO80B-WBP1  | XLOC_035090 | 948 coding  | coding    | coding    | coding    |
| MSTRG. 27370. 3 | TTC31        | XLOC_035094 | 546 coding  | noncoding | noncoding | noncoding |
| MSTRG. 27376. 3 | PCGF1        | XLOC_035097 | 253 coding  | noncoding | noncoding | noncoding |
| MSTRG. 27382. 1 | LOC102724497 | XLOC_035117 | 262 coding  | noncoding | noncoding | noncoding |
| MSTRG. 27385. 1 | LOC102724482 | XLOC_035119 | 595 coding  | noncoding | noncoding | noncoding |
| MSTRG. 27387. 1 |              | XLOC_035124 | 319 coding  | noncoding | noncoding | noncoding |
| MSTRG. 27860. 1 | TACR1        | XLOC_035168 | 639 coding  | noncoding | noncoding | noncoding |
| MSTRG. 27440. 1 |              | XLOC_035237 | 269 coding  | noncoding | noncoding | noncoding |
| MSTRG. 27450. 1 |              | XLOC_035242 | 204 coding  | noncoding | noncoding | noncoding |
| MSTRG. 27460. 1 |              | XLOC_035248 | 261 coding  | noncoding | noncoding | noncoding |
| MSTRG. 27536. 1 | LOC101927967 | XLOC_035273 | 252 coding  | noncoding | noncoding | noncoding |
| MSTRG. 27540. 1 | LOC101927967 | XLOC_035276 | 257 coding  | noncoding | noncoding | noncoding |
| MSTRG. 27541. 1 | LOC101927967 | XLOC_035277 | 385 coding  | noncoding | noncoding | noncoding |
| MSTRG. 27547. 1 | LOC101927967 | XLOC_035281 | 419 coding  | noncoding | noncoding | noncoding |
| MSTRG. 27555. 1 |              | XLOC_035296 | 252 coding  | coding    | noncoding | noncoding |
| MSTRG. 27614. 1 | CTNNA2       | XLOC_035314 | 268 coding  | noncoding | noncoding | noncoding |
| MSTRG. 27628. 1 | CTNNA2       | XLOC_035323 | 715 coding  | noncoding | noncoding | noncoding |
| MSTRG. 27584. 1 |              | XLOC_035338 | 216 coding  | coding    | noncoding | noncoding |
| MSTRG. 27585. 1 |              | XLOC_035339 | 331 coding  | noncoding | noncoding | noncoding |
| MSTRG. 27649. 1 | LOC102724542 | XLOC_035345 | 242 coding  | noncoding | noncoding | noncoding |
| MSTRG. 27597. 1 |              | XLOC_035357 | 272 coding  | noncoding | noncoding | noncoding |

|                 |              |             |             |           |           |           |
|-----------------|--------------|-------------|-------------|-----------|-----------|-----------|
| MSTRG. 27667. 1 |              | XLOC_035362 | 316 coding  | noncoding | noncoding | noncoding |
| MSTRG. 27670. 1 |              | XLOC_035367 | 310 coding  | noncoding | noncoding | noncoding |
| MSTRG. 27680. 1 |              | XLOC_035373 | 228 coding  | noncoding | noncoding | noncoding |
| MSTRG. 27696. 1 |              | XLOC_035381 | 327 coding  | noncoding | noncoding | noncoding |
| MSTRG. 27714. 1 |              | XLOC_035389 | 232 coding  | coding    | noncoding | noncoding |
| MSTRG. 27715. 1 |              | XLOC_035390 | 310 coding  | noncoding | noncoding | noncoding |
| MSTRG. 27716. 1 |              | XLOC_035392 | 242 coding  | noncoding | noncoding | noncoding |
| MSTRG. 27739. 1 | LOC107985905 | XLOC_035400 | 229 coding  | noncoding | noncoding | noncoding |
| MSTRG. 27734. 1 |              | XLOC_035401 | 224 coding  | noncoding | noncoding | noncoding |
| MSTRG. 27755. 1 | LOC105374838 | XLOC_035440 | 317 coding  | noncoding | noncoding | noncoding |
| MSTRG. 27759. 5 | KCMF1        | XLOC_035444 | 1833 coding | coding    | noncoding | noncoding |
| MSTRG. 27747. 1 |              | XLOC_035447 | 235 coding  | noncoding | noncoding | noncoding |
| MSTRG. 27955. 1 | TCF7L1       | XLOC_035449 | 263 coding  | noncoding | noncoding | noncoding |
| NM_017750. 4    | RETSAT       | XLOC_035457 | 3141 coding | coding    | coding    | coding    |
| MSTRG. 27979. 3 | ELMOD3       | XLOC_035460 | 210 coding  | coding    | noncoding | noncoding |
| MSTRG. 28011. 1 |              | XLOC_035484 | 250 coding  | noncoding | noncoding | noncoding |
| MSTRG. 28037. 1 | ST3GAL5      | XLOC_035489 | 234 coding  | noncoding | noncoding | noncoding |
| MSTRG. 28073. 4 | PTCD3        | XLOC_035503 | 1308 coding | coding    | noncoding | noncoding |
| MSTRG. 28083. 1 | IMMT         | XLOC_035511 | 252 coding  | noncoding | noncoding | noncoding |
| MSTRG. 28056. 1 | REEP1        | XLOC_035515 | 218 coding  | noncoding | noncoding | noncoding |
| MSTRG. 28048. 1 |              | XLOC_035516 | 304 coding  | noncoding | noncoding | noncoding |
| MSTRG. 28162. 1 | RNF103-CHMP3 | XLOC_035535 | 273 coding  | noncoding | noncoding | noncoding |
| MSTRG. 28163. 1 | RNF103-CHMP3 | XLOC_035536 | 260 coding  | noncoding | noncoding | noncoding |
| MSTRG. 28113. 1 | ANAPC1P1     | XLOC_035555 | 325 coding  | noncoding | noncoding | noncoding |
| MSTRG. 28221. 1 |              | XLOC_035607 | 576 coding  | noncoding | noncoding | noncoding |
| MSTRG. 28249. 1 | LOC101928347 | XLOC_035612 | 285 coding  | noncoding | noncoding | noncoding |
| MSTRG. 28246. 1 |              | XLOC_035625 | 293 coding  | noncoding | noncoding | noncoding |
| NM_001313915. 1 | EIF2AK3      | XLOC_035626 | 4223 coding | coding    | coding    | coding    |
| MSTRG. 28280. 3 | ANKRD36BP2   | XLOC_035640 | 3099 coding | coding    | noncoding | noncoding |
| NR_160763. 1    | LOC107985911 | XLOC_035647 | 4457 coding | noncoding | coding    | noncoding |
| MSTRG. 28460. 1 | IGKV4-1      | XLOC_035662 | 295 coding  | noncoding | noncoding | noncoding |
| MSTRG. 28463. 1 | IGKV4-1      | XLOC_035664 | 366 coding  | coding    | noncoding | noncoding |
| MSTRG. 28288. 1 |              | XLOC_035675 | 292 coding  | coding    | noncoding | noncoding |
| MSTRG. 28298. 1 | LSP1P4       | XLOC_035680 | 438 coding  | noncoding | noncoding | noncoding |
| MSTRG. 28361. 1 |              | XLOC_035690 | 255 coding  | noncoding | noncoding | noncoding |
| MSTRG. 28369. 1 |              | XLOC_035691 | 239 coding  | noncoding | noncoding | noncoding |
| MSTRG. 28393. 1 | LOC107985915 | XLOC_035702 | 249 coding  | noncoding | noncoding | noncoding |
| MSTRG. 28395. 1 | LOC107985915 | XLOC_035703 | 424 coding  | noncoding | noncoding | noncoding |
| MSTRG. 28406. 1 | LOC100509620 | XLOC_035713 | 316 coding  | noncoding | noncoding | noncoding |
| MSTRG. 28408. 1 | LOC100509620 | XLOC_035715 | 259 coding  | noncoding | noncoding | noncoding |
| MSTRG. 28400. 1 |              | XLOC_035716 | 327 coding  | noncoding | noncoding | noncoding |
| MSTRG. 28419. 1 | TEKT4        | XLOC_035720 | 238 coding  | coding    | coding    | noncoding |
| MSTRG. 28484. 1 | MRPSS        | XLOC_035729 | 253 coding  | noncoding | noncoding | noncoding |

|                |              |             |              |           |           |           |
|----------------|--------------|-------------|--------------|-----------|-----------|-----------|
| MSTRG.28501.1  |              | XLOC_035740 | 234 coding   | noncoding | noncoding | noncoding |
| XR_923077.2    | LOC105373490 | XLOC_035761 | 4565 coding  | noncoding | noncoding | noncoding |
| MSTRG.28535.1  |              | XLOC_035766 | 627 coding   | noncoding | noncoding | noncoding |
| MSTRG.28594.1  | ANKRD36C     | XLOC_035778 | 372 coding   | noncoding | noncoding | noncoding |
| MSTRG.28606.1  | ANKRD36C     | XLOC_035787 | 340 coding   | noncoding | noncoding | noncoding |
| MSTRG.28545.1  |              | XLOC_035799 | 285 coding   | noncoding | noncoding | noncoding |
| XM_011511206.2 | ASTL         | XLOC_035802 | 3367 coding  | coding    | coding    | coding    |
| MSTRG.28572.1  | STARD7-AS1   | XLOC_035810 | 643 coding   | coding    | noncoding | noncoding |
| MSTRG.28632.1  |              | XLOC_035821 | 313 coding   | noncoding | noncoding | noncoding |
| MSTRG.28610.1  |              | XLOC_035831 | 300 coding   | noncoding | noncoding | noncoding |
| MSTRG.28654.1  | FER1L5       | XLOC_035840 | 294 coding   | noncoding | noncoding | noncoding |
| MSTRG.28661.1  | LMAN2L       | XLOC_035845 | 271 coding   | noncoding | noncoding | noncoding |
| MSTRG.28685.1  | FAM178B      | XLOC_035862 | 421 coding   | noncoding | noncoding | noncoding |
| XM_011510746.2 | FAHD2B       | XLOC_035866 | 3176 coding  | coding    | coding    | coding    |
| MSTRG.28775.1  | ANKRD36B     | XLOC_035887 | 251 coding   | noncoding | noncoding | noncoding |
| MSTRG.28721.1  |              | XLOC_035890 | 253 coding   | noncoding | noncoding | noncoding |
| MSTRG.28849.1  | TMEM131      | XLOC_035940 | 252 coding   | noncoding | noncoding | noncoding |
| MSTRG.28956.10 | INPP4A       | XLOC_035955 | 10187 coding | noncoding | coding    | coding    |
| NM_001008215.3 | COA5         | XLOC_035958 | 1770 coding  | coding    | noncoding | noncoding |
| MSTRG.28905.1  | TSGA10       | XLOC_036001 | 260 coding   | noncoding | noncoding | noncoding |
| MSTRG.28930.22 | MRPL30       | XLOC_036009 | 1342 coding  | coding    | noncoding | noncoding |
| MSTRG.29016.3  | EIF5B        | XLOC_036032 | 2538 coding  | coding    | coding    | noncoding |
| NR_135650.1    | REV1         | XLOC_036032 | 5223 coding  | coding    | coding    | coding    |
| MSTRG.28952.1  |              | XLOC_036034 | 286 coding   | noncoding | noncoding | noncoding |
| MSTRG.28950.1  |              | XLOC_036035 | 271 coding   | noncoding | noncoding | noncoding |
| MSTRG.29666.1  | AFF3         | XLOC_036040 | 246 coding   | noncoding | noncoding | noncoding |
| MSTRG.29684.1  | AFF3         | XLOC_036055 | 296 coding   | noncoding | noncoding | noncoding |
| MSTRG.29019.1  |              | XLOC_036075 | 241 coding   | noncoding | noncoding | noncoding |
| MSTRG.29041.1  |              | XLOC_036090 | 464 coding   | noncoding | noncoding | noncoding |
| MSTRG.29056.1  |              | XLOC_036093 | 230 coding   | noncoding | noncoding | noncoding |
| MSTRG.29059.1  |              | XLOC_036097 | 258 coding   | noncoding | noncoding | noncoding |
| XR_001739612.1 | LOC105375310 | XLOC_036099 | 9341 coding  | noncoding | noncoding | coding    |
| MSTRG.29175.1  | TBC1D8       | XLOC_036112 | 210 coding   | noncoding | noncoding | noncoding |
| MSTRG.29182.1  |              | XLOC_036115 | 261 coding   | noncoding | noncoding | noncoding |
| XM_011510990.2 | RNF149       | XLOC_036117 | 4659 coding  | coding    | coding    | coding    |
| MSTRG.29083.1  | CREG2        | XLOC_036120 | 282 coding   | noncoding | noncoding | noncoding |
| MSTRG.29084.1  | CREG2        | XLOC_036121 | 292 coding   | noncoding | noncoding | noncoding |
| XM_011511777.2 | RFX8         | XLOC_036124 | 2389 coding  | noncoding | coding    | coding    |
| MSTRG.29089.1  |              | XLOC_036127 | 318 coding   | noncoding | noncoding | noncoding |
| MSTRG.29091.1  |              | XLOC_036128 | 289 coding   | noncoding | noncoding | noncoding |
| MSTRG.29092.1  |              | XLOC_036129 | 235 coding   | noncoding | noncoding | noncoding |
| MSTRG.29118.14 | MAP4K4       | XLOC_036131 | 4441 coding  | coding    | coding    | coding    |
| MSTRG.29121.1  | MAP4K4       | XLOC_036132 | 459 coding   | noncoding | noncoding | noncoding |

|                 |              |             |             |           |           |           |
|-----------------|--------------|-------------|-------------|-----------|-----------|-----------|
| MSTRG. 29114. 1 |              | XLOC_036149 | 333 coding  | noncoding | noncoding | noncoding |
| MSTRG. 29247. 1 | SLC9A2       | XLOC_036187 | 280 coding  | noncoding | noncoding | noncoding |
| MSTRG. 29329. 1 |              | XLOC_036226 | 344 coding  | noncoding | noncoding | noncoding |
| MSTRG. 29332. 1 |              | XLOC_036227 | 302 coding  | noncoding | noncoding | noncoding |
| MSTRG. 29371. 1 |              | XLOC_036253 | 217 coding  | noncoding | noncoding | noncoding |
| MSTRG. 29383. 1 | PANTR1       | XLOC_036258 | 361 coding  | noncoding | noncoding | noncoding |
| MSTRG. 29426. 1 |              | XLOC_036272 | 280 coding  | noncoding | noncoding | noncoding |
| MSTRG. 29428. 1 |              | XLOC_036275 | 287 coding  | noncoding | noncoding | noncoding |
| NM_001318894. 1 | FHL2         | XLOC_036284 | 1767 coding | coding    | coding    | coding    |
| MSTRG. 29487. 1 | FHL2         | XLOC_036285 | 299 coding  | noncoding | noncoding | noncoding |
| XM_011511904. 3 | UXS1         | XLOC_036313 | 2166 coding | coding    | coding    | coding    |
| NM_025076. 4    | UXS1         | XLOC_036313 | 2084 coding | coding    | coding    | coding    |
| MSTRG. 29511. 1 |              | XLOC_036324 | 250 coding  | noncoding | noncoding | noncoding |
| MSTRG. 29513. 1 |              | XLOC_036325 | 603 coding  | noncoding | noncoding | noncoding |
| MSTRG. 29518. 1 |              | XLOC_036330 | 283 coding  | noncoding | noncoding | noncoding |
| XM_017004739. 2 | RGPD3        | XLOC_036331 | 5892 coding | coding    | coding    | coding    |
| MSTRG. 29545. 5 | RGPD3        | XLOC_036331 | 455 coding  | noncoding | noncoding | noncoding |
| MSTRG. 29557. 1 |              | XLOC_036342 | 445 coding  | noncoding | noncoding | noncoding |
| MSTRG. 29556. 1 |              | XLOC_036343 | 214 coding  | noncoding | noncoding | noncoding |
| MSTRG. 29607. 1 | LINC01789    | XLOC_036346 | 241 coding  | noncoding | noncoding | noncoding |
| MSTRG. 29657. 1 |              | XLOC_036376 | 215 coding  | noncoding | noncoding | noncoding |
| MSTRG. 29747. 1 |              | XLOC_036389 | 264 coding  | noncoding | noncoding | noncoding |
| MSTRG. 29925. 1 | SH3RF3       | XLOC_036446 | 221 coding  | noncoding | noncoding | noncoding |
| MSTRG. 29773. 1 |              | XLOC_036482 | 250 coding  | noncoding | noncoding | noncoding |
| MSTRG. 29774. 1 |              | XLOC_036483 | 259 coding  | noncoding | noncoding | noncoding |
| MSTRG. 29775. 1 | LOC100506563 | XLOC_036484 | 349 coding  | noncoding | noncoding | noncoding |
| NM_000272. 4    | NPHP1        | XLOC_036505 | 3727 coding | coding    | coding    | coding    |
| MSTRG. 29811. 1 | NPHP1        | XLOC_036506 | 458 coding  | noncoding | noncoding | noncoding |
| MSTRG. 29817. 1 | NPHP1        | XLOC_036508 | 424 coding  | noncoding | noncoding | noncoding |
| MSTRG. 29820. 1 | NPHP1        | XLOC_036509 | 266 coding  | noncoding | noncoding | noncoding |
| MSTRG. 29826. 1 |              | XLOC_036513 | 261 coding  | coding    | noncoding | noncoding |
| MSTRG. 29843. 1 | LOC102724875 | XLOC_036518 | 277 coding  | noncoding | noncoding | noncoding |
| MSTRG. 29969. 1 | ACOXL        | XLOC_036529 | 226 coding  | noncoding | noncoding | noncoding |
| MSTRG. 29986. 1 | ACOXL        | XLOC_036542 | 294 coding  | noncoding | noncoding | noncoding |
| MSTRG. 30043. 1 | LOC101927283 | XLOC_036554 | 308 coding  | noncoding | noncoding | noncoding |
| MSTRG. 30001. 1 |              | XLOC_036590 | 447 coding  | noncoding | noncoding | noncoding |
| XM_017004715. 1 | ANAPC1       | XLOC_036592 | 5185 coding | coding    | coding    | coding    |
| MSTRG. 30029. 1 | ANAPC1       | XLOC_036597 | 226 coding  | noncoding | noncoding | noncoding |
| MSTRG. 30155. 1 |              | XLOC_036643 | 276 coding  | noncoding | noncoding | noncoding |
| MSTRG. 30142. 1 |              | XLOC_036652 | 243 coding  | noncoding | noncoding | noncoding |
| MSTRG. 30143. 1 |              | XLOC_036653 | 287 coding  | noncoding | noncoding | noncoding |
| MSTRG. 30192. 1 |              | XLOC_036661 | 231 coding  | noncoding | noncoding | noncoding |
| MSTRG. 30209. 1 | IL36B        | XLOC_036676 | 289 coding  | noncoding | noncoding | noncoding |

|                  |              |             |             |           |           |           |
|------------------|--------------|-------------|-------------|-----------|-----------|-----------|
| MSTRG. 30210. 1  |              | XLOC_036679 | 224 coding  | noncoding | noncoding | noncoding |
| MSTRG. 30302. 1  |              | XLOC_036733 | 261 coding  | noncoding | noncoding | noncoding |
| MSTRG. 30392. 1  | ACTR3-AS1    | XLOC_036749 | 225 coding  | noncoding | noncoding | noncoding |
| MSTRG. 30470. 1  | DPP10        | XLOC_036776 | 287 coding  | noncoding | noncoding | noncoding |
| MSTRG. 30471. 1  | DPP10        | XLOC_036777 | 289 coding  | noncoding | noncoding | noncoding |
| MSTRG. 30474. 1  | DPP10        | XLOC_036780 | 242 coding  | noncoding | noncoding | noncoding |
| MSTRG. 30478. 1  | DPP10        | XLOC_036782 | 266 coding  | noncoding | noncoding | noncoding |
| MSTRG. 30511. 1  | DPP10        | XLOC_036798 | 229 coding  | noncoding | noncoding | noncoding |
| MSTRG. 30354. 1  |              | XLOC_036803 | 215 coding  | coding    | noncoding | noncoding |
| MSTRG. 30376. 1  |              | XLOC_036814 | 486 coding  | noncoding | noncoding | noncoding |
| MSTRG. 30445. 1  |              | XLOC_036821 | 249 coding  | noncoding | noncoding | noncoding |
| NM_019044. 5     | CCDC93       | XLOC_036831 | 6833 coding | coding    | coding    | coding    |
| MSTRG. 30587. 1  |              | XLOC_036864 | 293 coding  | noncoding | noncoding | noncoding |
| MSTRG. 30607. 1  |              | XLOC_036876 | 259 coding  | noncoding | noncoding | noncoding |
| MSTRG. 30616. 1  |              | XLOC_036885 | 272 coding  | noncoding | noncoding | noncoding |
| MSTRG. 30655. 1  | C2orf76      | XLOC_036899 | 396 coding  | noncoding | noncoding | noncoding |
| MSTRG. 30649. 1  |              | XLOC_036915 | 314 coding  | noncoding | noncoding | noncoding |
| MSTRG. 30693. 14 | LOC101927764 | XLOC_036926 | 5190 coding | coding    | coding    | coding    |
| MSTRG. 30804. 1  |              | XLOC_036942 | 236 coding  | noncoding | noncoding | noncoding |
| MSTRG. 30806. 1  |              | XLOC_036944 | 230 coding  | coding    | noncoding | noncoding |
| MSTRG. 30723. 1  |              | XLOC_036957 | 205 coding  | noncoding | noncoding | noncoding |
| MSTRG. 30769. 1  |              | XLOC_036982 | 279 coding  | noncoding | noncoding | noncoding |
| XM_017003679. 2  | CLASP1       | XLOC_036983 | 8798 coding | coding    | coding    | coding    |
| MSTRG. 30812. 1  |              | XLOC_037029 | 255 coding  | noncoding | noncoding | noncoding |
| MSTRG. 30816. 1  | LOC105373590 | XLOC_037032 | 221 coding  | noncoding | noncoding | noncoding |
| MSTRG. 30836. 1  | LOC105373592 | XLOC_037036 | 211 coding  | coding    | noncoding | noncoding |
| MSTRG. 30841. 1  | LOC105373592 | XLOC_037039 | 328 coding  | noncoding | noncoding | noncoding |
| MSTRG. 30875. 1  |              | XLOC_037067 | 404 coding  | noncoding | noncoding | noncoding |
| MSTRG. 30884. 1  |              | XLOC_037075 | 276 coding  | noncoding | noncoding | noncoding |
| MSTRG. 30890. 1  |              | XLOC_037078 | 313 coding  | noncoding | noncoding | noncoding |
| MSTRG. 30896. 1  |              | XLOC_037081 | 244 coding  | noncoding | noncoding | noncoding |
| MSTRG. 30911. 1  |              | XLOC_037088 | 296 coding  | noncoding | noncoding | noncoding |
| MSTRG. 30961. 1  | CNTNAP5      | XLOC_037100 | 250 coding  | noncoding | noncoding | noncoding |
| MSTRG. 30967. 1  | CNTNAP5      | XLOC_037103 | 211 coding  | noncoding | noncoding | noncoding |
| MSTRG. 30978. 1  | CNTNAP5      | XLOC_037110 | 310 coding  | noncoding | noncoding | noncoding |
| MSTRG. 30938. 1  |              | XLOC_037123 | 276 coding  | noncoding | noncoding | noncoding |
| MSTRG. 30939. 1  |              | XLOC_037124 | 214 coding  | noncoding | noncoding | noncoding |
| NM_001367502. 1  | CYP27C1      | XLOC_037158 | 5082 coding | coding    | coding    | coding    |
| MSTRG. 31176. 1  | POLR2D       | XLOC_037207 | 365 coding  | noncoding | noncoding | noncoding |
| MSTRG. 31180. 1  |              | XLOC_037212 | 251 coding  | noncoding | noncoding | noncoding |
| MSTRG. 31178. 1  |              | XLOC_037213 | 242 coding  | noncoding | noncoding | noncoding |
| MSTRG. 31182. 1  |              | XLOC_037215 | 242 coding  | noncoding | noncoding | noncoding |
| MSTRG. 31203. 1  | SAP130       | XLOC_037219 | 294 coding  | noncoding | noncoding | noncoding |

|                  |              |             |              |           |           |           |
|------------------|--------------|-------------|--------------|-----------|-----------|-----------|
| MSTRG. 31205. 1  | SAP130       | XLOC_037221 | 252 coding   | noncoding | noncoding | noncoding |
| MSTRG. 31206. 1  | SAP130       | XLOC_037222 | 314 coding   | noncoding | noncoding | noncoding |
| MSTRG. 31254. 1  | LOC105373611 | XLOC_037245 | 283 coding   | noncoding | noncoding | noncoding |
| MSTRG. 31260. 1  |              | XLOC_037251 | 308 coding   | noncoding | noncoding | noncoding |
| MSTRG. 31315. 1  |              | XLOC_037265 | 300 coding   | coding    | noncoding | noncoding |
| MSTRG. 31321. 1  |              | XLOC_037281 | 305 coding   | noncoding | coding    | noncoding |
| NR_026758. 2     | FAR2P1       | XLOC_037284 | 4526 coding  | coding    | coding    | noncoding |
| MSTRG. 31338. 1  |              | XLOC_037295 | 349 coding   | noncoding | noncoding | noncoding |
| MSTRG. 31343. 1  |              | XLOC_037298 | 322 coding   | coding    | noncoding | noncoding |
| NR_046258. 1     | FAR2P2       | XLOC_037313 | 2858 coding  | noncoding | noncoding | noncoding |
| MSTRG. 31455. 1  | LOC150776    | XLOC_037350 | 443 coding   | noncoding | noncoding | noncoding |
| MSTRG. 31460. 1  | LOC105373622 | XLOC_037368 | 246 coding   | noncoding | noncoding | noncoding |
| MSTRG. 31501. 1  | GPR39        | XLOC_037372 | 324 coding   | coding    | noncoding | noncoding |
| MSTRG. 31506. 1  | GPR39        | XLOC_037374 | 287 coding   | noncoding | noncoding | noncoding |
| XM_011511102. 2  | NCKAP5       | XLOC_037377 | 11571 coding | coding    | coding    | coding    |
| MSTRG. 31521. 1  | NCKAP5       | XLOC_037382 | 371 coding   | noncoding | noncoding | noncoding |
| MSTRG. 31523. 1  | NCKAP5       | XLOC_037384 | 360 coding   | coding    | noncoding | noncoding |
| MSTRG. 31555. 1  | NCKAP5       | XLOC_037396 | 248 coding   | noncoding | noncoding | noncoding |
| MSTRG. 31558. 1  | NCKAP5       | XLOC_037398 | 262 coding   | noncoding | noncoding | noncoding |
| MSTRG. 31577. 1  | NCKAP5       | XLOC_037405 | 264 coding   | noncoding | noncoding | noncoding |
| MSTRG. 31473. 1  |              | XLOC_037409 | 259 coding   | noncoding | noncoding | noncoding |
| MSTRG. 31493. 1  |              | XLOC_037418 | 471 coding   | noncoding | noncoding | noncoding |
| NM_030923. 5     | TMEM163      | XLOC_037419 | 1892 coding  | noncoding | coding    | coding    |
| MSTRG. 31938. 1  | ZRANB3       | XLOC_037443 | 562 coding   | noncoding | noncoding | noncoding |
| MSTRG. 31939. 1  | ZRANB3       | XLOC_037444 | 461 coding   | noncoding | noncoding | noncoding |
| MSTRG. 31769. 1  | THSD7B       | XLOC_037519 | 248 coding   | noncoding | noncoding | noncoding |
| MSTRG. 32154. 1  |              | XLOC_037537 | 266 coding   | coding    | noncoding | noncoding |
| MSTRG. 31990. 1  |              | XLOC_037558 | 315 coding   | noncoding | noncoding | noncoding |
| MSTRG. 31981. 1  |              | XLOC_037562 | 272 coding   | noncoding | noncoding | noncoding |
| MSTRG. 31999. 1  | LOC105373643 | XLOC_037572 | 320 coding   | noncoding | noncoding | noncoding |
| MSTRG. 32018. 1  |              | XLOC_037581 | 226 coding   | noncoding | noncoding | noncoding |
| MSTRG. 32027. 1  |              | XLOC_037586 | 299 coding   | noncoding | noncoding | noncoding |
| MSTRG. 32028. 1  |              | XLOC_037587 | 239 coding   | noncoding | noncoding | noncoding |
| MSTRG. 32086. 1  | LRP1B        | XLOC_037591 | 216 coding   | noncoding | noncoding | noncoding |
| MSTRG. 32116. 1  | LOC105373649 | XLOC_037606 | 366 coding   | noncoding | noncoding | noncoding |
| MSTRG. 32147. 1  | LRP1B        | XLOC_037621 | 283 coding   | noncoding | noncoding | noncoding |
| MSTRG. 32152. 1  | LRP1B        | XLOC_037625 | 233 coding   | noncoding | noncoding | noncoding |
| MSTRG. 32051. 1  |              | XLOC_037638 | 279 coding   | noncoding | noncoding | noncoding |
| MSTRG. 33081. 27 | ARHGAP15     | XLOC_037652 | 2058 coding  | coding    | noncoding | noncoding |
| MSTRG. 33081. 31 | ARHGAP15     | XLOC_037652 | 11119 coding | noncoding | noncoding | noncoding |
| MSTRG. 33081. 36 | ARHGAP15     | XLOC_037652 | 6556 coding  | noncoding | noncoding | noncoding |
| MSTRG. 33081. 35 | ARHGAP15     | XLOC_037652 | 30252 coding | noncoding | coding    | noncoding |
| MSTRG. 33081. 40 | ARHGAP15     | XLOC_037652 | 12382 coding | coding    | coding    | noncoding |

|                 |              |             |             |           |           |           |
|-----------------|--------------|-------------|-------------|-----------|-----------|-----------|
| MSTRG. 32323. 1 | TEX41        | XLOC_037750 | 522 coding  | noncoding | noncoding | noncoding |
| MSTRG. 32327. 1 | TEX41        | XLOC_037751 | 291 coding  | noncoding | noncoding | noncoding |
| MSTRG. 32345. 1 |              | XLOC_037766 | 257 coding  | noncoding | noncoding | noncoding |
| MSTRG. 32351. 1 |              | XLOC_037770 | 272 coding  | noncoding | noncoding | noncoding |
| MSTRG. 32355. 1 | LOC105373667 | XLOC_037773 | 302 coding  | coding    | noncoding | noncoding |
| MSTRG. 32364. 1 | LOC105373667 | XLOC_037779 | 309 coding  | noncoding | noncoding | noncoding |
| MSTRG. 32374. 1 |              | XLOC_037781 | 313 coding  | noncoding | noncoding | noncoding |
| MSTRG. 32390. 1 |              | XLOC_037787 | 240 coding  | noncoding | noncoding | noncoding |
| MSTRG. 32423. 1 |              | XLOC_037802 | 323 coding  | noncoding | noncoding | noncoding |
| MSTRG. 32428. 1 |              | XLOC_037804 | 391 coding  | noncoding | noncoding | noncoding |
| MSTRG. 32464. 1 |              | XLOC_037827 | 221 coding  | noncoding | noncoding | noncoding |
| MSTRG. 32562. 1 | LYPD6B       | XLOC_037856 | 216 coding  | noncoding | noncoding | noncoding |
| MSTRG. 32537. 1 |              | XLOC_037872 | 289 coding  | noncoding | noncoding | noncoding |
| MSTRG. 32607. 1 | LOC101929231 | XLOC_037887 | 428 coding  | noncoding | noncoding | noncoding |
| MSTRG. 32636. 1 |              | XLOC_037921 | 255 coding  | noncoding | noncoding | noncoding |
| MSTRG. 32649. 1 |              | XLOC_037934 | 313 coding  | noncoding | noncoding | noncoding |
| MSTRG. 33470. 6 | RIF1         | XLOC_037952 | 7507 coding | coding    | coding    | coding    |
| XR_001739736. 2 | LOC101929356 | XLOC_037964 | 7055 coding | noncoding | noncoding | noncoding |
| MSTRG. 32776. 1 | ARL5A        | XLOC_037969 | 251 coding  | noncoding | noncoding | noncoding |
| MSTRG. 32777. 1 |              | XLOC_038003 | 285 coding  | noncoding | noncoding | noncoding |
| MSTRG. 32783. 1 |              | XLOC_038007 | 304 coding  | noncoding | noncoding | noncoding |
| MSTRG. 33455. 1 | PRPF40A      | XLOC_038023 | 202 coding  | noncoding | noncoding | noncoding |
| MSTRG. 32807. 1 |              | XLOC_038046 | 330 coding  | noncoding | noncoding | noncoding |
| MSTRG. 32825. 1 |              | XLOC_038057 | 314 coding  | noncoding | noncoding | noncoding |
| MSTRG. 32829. 1 |              | XLOC_038060 | 309 coding  | coding    | noncoding | noncoding |
| MSTRG. 32832. 1 |              | XLOC_038061 | 303 coding  | coding    | noncoding | noncoding |
| MSTRG. 32876. 1 | GALNT13      | XLOC_038074 | 341 coding  | coding    | noncoding | noncoding |
| MSTRG. 32891. 1 |              | XLOC_038091 | 226 coding  | noncoding | noncoding | noncoding |
| MSTRG. 32889. 1 |              | XLOC_038092 | 232 coding  | noncoding | noncoding | noncoding |
| MSTRG. 32916. 1 | LOC105373703 | XLOC_038102 | 275 coding  | noncoding | noncoding | noncoding |
| MSTRG. 32949. 1 | LINC01876    | XLOC_038107 | 290 coding  | noncoding | noncoding | noncoding |
| MSTRG. 32951. 1 | LINC01876    | XLOC_038108 | 276 coding  | coding    | noncoding | noncoding |
| MSTRG. 33608. 1 | ACVR1        | XLOC_038197 | 248 coding  | noncoding | noncoding | noncoding |
| MSTRG. 33623. 1 | LOC105373714 | XLOC_038210 | 300 coding  | noncoding | noncoding | noncoding |
| MSTRG. 33581. 1 |              | XLOC_038213 | 274 coding  | noncoding | noncoding | noncoding |
| MSTRG. 33586. 1 | UPP2         | XLOC_038215 | 228 coding  | noncoding | noncoding | noncoding |
| MSTRG. 33589. 1 | UPP2         | XLOC_038217 | 201 coding  | noncoding | noncoding | noncoding |
| MSTRG. 33630. 1 |              | XLOC_038230 | 238 coding  | coding    | noncoding | noncoding |
| MSTRG. 33645. 1 | TANC1        | XLOC_038238 | 285 coding  | noncoding | noncoding | noncoding |
| MSTRG. 33740. 1 |              | XLOC_038325 | 225 coding  | noncoding | noncoding | noncoding |
| MSTRG. 33767. 1 |              | XLOC_038348 | 322 coding  | noncoding | noncoding | noncoding |
| XM_011510797. 3 | FAP          | XLOC_038382 | 6007 coding | coding    | coding    | coding    |
| MSTRG. 34079. 1 | KCNH7        | XLOC_038404 | 251 coding  | noncoding | noncoding | noncoding |

|                 |              |             |              |           |           |           |
|-----------------|--------------|-------------|--------------|-----------|-----------|-----------|
| MSTRG. 34084. 1 | KCNH7        | XLOC_038406 | 306 coding   | noncoding | noncoding | noncoding |
| MSTRG. 33965. 1 |              | XLOC_038418 | 260 coding   | noncoding | noncoding | noncoding |
| MSTRG. 33969. 1 |              | XLOC_038421 | 448 coding   | noncoding | noncoding | noncoding |
| XM_017004419. 1 | FIGN         | XLOC_038422 | 19473 coding | coding    | coding    | coding    |
| MSTRG. 34000. 1 |              | XLOC_038434 | 582 coding   | coding    | noncoding | noncoding |
| NM_004490. 3    | GRB14        | XLOC_038436 | 2415 coding  | coding    | coding    | coding    |
| MSTRG. 34025. 1 | SLC38A11     | XLOC_038452 | 247 coding   | noncoding | noncoding | noncoding |
| MSTRG. 34154. 1 | CSRNP3       | XLOC_038469 | 281 coding   | noncoding | noncoding | noncoding |
| MSTRG. 34211. 1 | LOC102724058 | XLOC_038491 | 292 coding   | noncoding | noncoding | noncoding |
| MSTRG. 34208. 1 | XIRP2        | XLOC_038514 | 243 coding   | coding    | noncoding | noncoding |
| MSTRG. 34246. 1 | B3GALT1      | XLOC_038519 | 265 coding   | noncoding | noncoding | noncoding |
| MSTRG. 34299. 1 |              | XLOC_038550 | 286 coding   | noncoding | noncoding | noncoding |
| MSTRG. 34335. 1 | LRP2         | XLOC_038575 | 234 coding   | noncoding | noncoding | noncoding |
| MSTRG. 34333. 1 |              | XLOC_038580 | 246 coding   | noncoding | noncoding | noncoding |
| MSTRG. 34352. 1 | FASTKD1      | XLOC_038586 | 282 coding   | noncoding | noncoding | noncoding |
| MSTRG. 34390. 1 |              | XLOC_038611 | 230 coding   | noncoding | noncoding | noncoding |
| MSTRG. 34391. 1 |              | XLOC_038612 | 258 coding   | coding    | noncoding | noncoding |
| MSTRG. 34535. 1 | MYO3B        | XLOC_038622 | 788 coding   | coding    | coding    | noncoding |
| MSTRG. 34544. 1 | MYO3B        | XLOC_038627 | 232 coding   | noncoding | noncoding | noncoding |
| MSTRG. 34505. 1 |              | XLOC_038646 | 642 coding   | noncoding | noncoding | noncoding |
| MSTRG. 34695. 1 | SLC25A12     | XLOC_038696 | 299 coding   | noncoding | noncoding | noncoding |
| MSTRG. 34675. 1 | LOC107985960 | XLOC_038727 | 244 coding   | noncoding | noncoding | noncoding |
| MSTRG. 34735. 3 | MAP3K20      | XLOC_038751 | 429 coding   | noncoding | noncoding | noncoding |
| MSTRG. 34705. 1 |              | XLOC_038753 | 265 coding   | noncoding | noncoding | noncoding |
| MSTRG. 34714. 1 |              | XLOC_038758 | 283 coding   | noncoding | noncoding | noncoding |
| MSTRG. 34722. 1 |              | XLOC_038761 | 264 coding   | noncoding | noncoding | noncoding |
| MSTRG. 34763. 1 |              | XLOC_038790 | 262 coding   | noncoding | noncoding | noncoding |
| MSTRG. 34764. 1 |              | XLOC_038791 | 284 coding   | noncoding | noncoding | noncoding |
| MSTRG. 34858. 1 | CIR1         | XLOC_038793 | 239 coding   | noncoding | noncoding | noncoding |
| MSTRG. 35010. 1 |              | XLOC_038800 | 640 coding   | noncoding | noncoding | noncoding |
| MSTRG. 35021. 1 | WIPF1        | XLOC_038808 | 237 coding   | noncoding | noncoding | noncoding |
| MSTRG. 34883. 1 |              | XLOC_038856 | 282 coding   | noncoding | noncoding | noncoding |
| MSTRG. 34906. 1 | HOXD12       | XLOC_038873 | 352 coding   | coding    | coding    | noncoding |
| NR_110458. 1    | HAGLR        | XLOC_038881 | 4086 coding  | noncoding | coding    | noncoding |
| MSTRG. 34919. 1 |              | XLOC_038883 | 279 coding   | noncoding | noncoding | noncoding |
| MSTRG. 34932. 1 |              | XLOC_038889 | 259 coding   | noncoding | noncoding | noncoding |
| MSTRG. 34934. 1 |              | XLOC_038890 | 221 coding   | noncoding | noncoding | noncoding |
| MSTRG. 34965. 1 |              | XLOC_038891 | 317 coding   | coding    | noncoding | noncoding |
| MSTRG. 34977. 1 |              | XLOC_038899 | 232 coding   | noncoding | noncoding | noncoding |
| MSTRG. 35000. 1 |              | XLOC_038909 | 298 coding   | noncoding | noncoding | noncoding |
| MSTRG. 35100. 1 |              | XLOC_038913 | 300 coding   | coding    | noncoding | noncoding |
| MSTRG. 35102. 1 | HNRNPA3      | XLOC_038915 | 7061 coding  | coding    | noncoding | noncoding |
| MSTRG. 35156. 1 |              | XLOC_038938 | 300 coding   | noncoding | noncoding | noncoding |

|                |              |             |              |           |           |           |
|----------------|--------------|-------------|--------------|-----------|-----------|-----------|
| NM_016953.4    | PDE11A       | XLOC_038942 | 9305 coding  | coding    | coding    | coding    |
| MSTRG.35054.1  | PDE11A       | XLOC_038951 | 249 coding   | noncoding | noncoding | noncoding |
| MSTRG.35071.1  | OSBPL6       | XLOC_038957 | 236 coding   | noncoding | noncoding | noncoding |
| MSTRG.35065.1  |              | XLOC_038963 | 326 coding   | noncoding | noncoding | noncoding |
| MSTRG.35898.7  | TTN          | XLOC_038971 | 3743 coding  | coding    | coding    | coding    |
| MSTRG.35898.28 | TTN          | XLOC_038971 | 15143 coding | coding    | noncoding | coding    |
| MSTRG.35928.1  | CCDC141      | XLOC_038989 | 336 coding   | noncoding | noncoding | noncoding |
| MSTRG.35234.1  | SESTD1       | XLOC_038991 | 245 coding   | coding    | noncoding | noncoding |
| MSTRG.35168.1  |              | XLOC_039019 | 229 coding   | noncoding | noncoding | noncoding |
| MSTRG.35272.1  |              | XLOC_039023 | 258 coding   | noncoding | noncoding | noncoding |
| MSTRG.35277.3  | CWC22        | XLOC_039025 | 229 coding   | noncoding | noncoding | noncoding |
| MSTRG.35197.1  |              | XLOC_039034 | 294 coding   | noncoding | noncoding | noncoding |
| MSTRG.35228.1  |              | XLOC_039051 | 266 coding   | noncoding | noncoding | noncoding |
| MSTRG.35261.1  | SCHLAP1      | XLOC_039058 | 252 coding   | noncoding | noncoding | noncoding |
| MSTRG.35338.1  | PPP1R1C      | XLOC_039089 | 303 coding   | noncoding | noncoding | noncoding |
| MSTRG.35369.1  | PDE1A        | XLOC_039101 | 269 coding   | noncoding | noncoding | noncoding |
| MSTRG.35378.5  | DNAJC10      | XLOC_039104 | 1320 coding  | coding    | noncoding | noncoding |
| NM_205842.3    | NCKAP1       | XLOC_039115 | 20350 coding | coding    | coding    | coding    |
| MSTRG.35499.1  |              | XLOC_039142 | 225 coding   | noncoding | noncoding | noncoding |
| MSTRG.35439.1  |              | XLOC_039174 | 293 coding   | noncoding | noncoding | noncoding |
| MSTRG.36065.1  | LOC107985783 | XLOC_039342 | 313 coding   | coding    | noncoding | noncoding |
| MSTRG.36134.2  | ZC3H15       | XLOC_039378 | 2027 coding  | coding    | noncoding | noncoding |
| MSTRG.35724.1  |              | XLOC_039381 | 267 coding   | noncoding | noncoding | noncoding |
| MSTRG.35730.1  |              | XLOC_039384 | 292 coding   | noncoding | noncoding | noncoding |
| MSTRG.35787.1  | LOC105373786 | XLOC_039398 | 298 coding   | noncoding | noncoding | noncoding |
| XM_024453059.1 | TFPI         | XLOC_039403 | 2079 coding  | coding    | coding    | coding    |
| MSTRG.35846.1  | COL5A2       | XLOC_039441 | 353 coding   | noncoding | noncoding | noncoding |
| MSTRG.35875.1  | LOC101927252 | XLOC_039448 | 259 coding   | noncoding | noncoding | noncoding |
| MSTRG.35888.1  | SLC40A1      | XLOC_039453 | 263 coding   | noncoding | noncoding | noncoding |
| NM_001128150.1 | ORMDL1       | XLOC_039463 | 2072 coding  | coding    | noncoding | coding    |
| MSTRG.35934.1  |              | XLOC_039494 | 275 coding   | noncoding | coding    | noncoding |
| MSTRG.35940.1  |              | XLOC_039523 | 287 coding   | coding    | coding    | noncoding |
| XM_017004783.2 | STAT1        | XLOC_039530 | 4360 coding  | coding    | coding    | coding    |
| MSTRG.36288.1  | STAT4        | XLOC_039555 | 729 coding   | noncoding | noncoding | noncoding |
| MSTRG.36330.1  |              | XLOC_039618 | 290 coding   | noncoding | coding    | noncoding |
| MSTRG.36403.1  |              | XLOC_039628 | 322 coding   | noncoding | noncoding | noncoding |
| MSTRG.36387.1  |              | XLOC_039633 | 286 coding   | noncoding | noncoding | noncoding |
| MSTRG.36435.1  |              | XLOC_039656 | 287 coding   | noncoding | noncoding | noncoding |
| MSTRG.36436.1  |              | XLOC_039657 | 211 coding   | noncoding | noncoding | noncoding |
| MSTRG.36445.1  | LINC01821    | XLOC_039661 | 265 coding   | noncoding | noncoding | noncoding |
| MSTRG.36451.1  |              | XLOC_039665 | 219 coding   | noncoding | noncoding | noncoding |
| MSTRG.36484.1  | LOC105376755 | XLOC_039668 | 261 coding   | noncoding | noncoding | noncoding |
| MSTRG.36602.1  |              | XLOC_039728 | 213 coding   | noncoding | noncoding | noncoding |

|                  |              |             |              |           |           |           |
|------------------|--------------|-------------|--------------|-----------|-----------|-----------|
| MSTRG. 36688. 1  | PGAP1        | XLOC_039732 | 280 coding   | noncoding | noncoding | noncoding |
| XM_011512148. 2  | ANKRD44      | XLOC_039737 | 9307 coding  | coding    | coding    | coding    |
| MSTRG. 36715. 1  |              | XLOC_039765 | 292 coding   | coding    | noncoding | noncoding |
| MSTRG. 36752. 1  |              | XLOC_039791 | 261 coding   | noncoding | noncoding | noncoding |
| MSTRG. 36756. 1  |              | XLOC_039793 | 419 coding   | noncoding | noncoding | noncoding |
| MSTRG. 36797. 1  |              | XLOC_039821 | 222 coding   | noncoding | noncoding | noncoding |
| XR_002959289. 1  | FTCDNL1      | XLOC_039823 | 6811 coding  | coding    | noncoding | noncoding |
| XM_024452854. 1  | FTCDNL1      | XLOC_039823 | 1631 coding  | coding    | noncoding | noncoding |
| MSTRG. 36864. 1  |              | XLOC_039848 | 323 coding   | noncoding | noncoding | noncoding |
| MSTRG. 36979. 1  |              | XLOC_039870 | 233 coding   | coding    | noncoding | noncoding |
| NM_001162407. 1  | CLK1         | XLOC_039871 | 2213 coding  | coding    | coding    | coding    |
| MSTRG. 37172. 17 | CASP8        | XLOC_039912 | 2020 coding  | coding    | coding    | coding    |
| MSTRG. 37172. 16 | CASP8        | XLOC_039912 | 2065 coding  | coding    | coding    | coding    |
| XM_017003362. 2  | FLACC1       | XLOC_039912 | 1527 coding  | noncoding | coding    | coding    |
| MSTRG. 37005. 1  | C2CD6        | XLOC_039922 | 268 coding   | noncoding | noncoding | noncoding |
| MSTRG. 37067. 1  | ALS2         | XLOC_039928 | 289 coding   | noncoding | noncoding | noncoding |
| MSTRG. 37074. 1  | ALS2         | XLOC_039929 | 273 coding   | noncoding | noncoding | noncoding |
| MSTRG. 37045. 1  | KIAA2012     | XLOC_039943 | 253 coding   | noncoding | noncoding | noncoding |
| MSTRG. 37092. 1  |              | XLOC_039957 | 369 coding   | noncoding | noncoding | noncoding |
| MSTRG. 37100. 1  |              | XLOC_039961 | 255 coding   | noncoding | noncoding | noncoding |
| MSTRG. 37102. 1  |              | XLOC_039962 | 257 coding   | noncoding | noncoding | noncoding |
| MSTRG. 37312. 1  | CYP20A1      | XLOC_040005 | 900 coding   | noncoding | noncoding | noncoding |
| MSTRG. 37319. 1  |              | XLOC_040011 | 239 coding   | noncoding | noncoding | noncoding |
| MSTRG. 37272. 1  |              | XLOC_040018 | 223 coding   | noncoding | noncoding | noncoding |
| MSTRG. 37343. 1  |              | XLOC_040050 | 283 coding   | noncoding | noncoding | noncoding |
| MSTRG. 37441. 1  | PARD3B       | XLOC_040074 | 253 coding   | noncoding | noncoding | noncoding |
| MSTRG. 37455. 1  | PARD3B       | XLOC_040080 | 318 coding   | coding    | noncoding | noncoding |
| MSTRG. 37457. 1  | PARD3B       | XLOC_040082 | 243 coding   | coding    | noncoding | noncoding |
| MSTRG. 37358. 1  |              | XLOC_040097 | 283 coding   | noncoding | noncoding | noncoding |
| MSTRG. 37371. 1  |              | XLOC_040112 | 305 coding   | noncoding | noncoding | noncoding |
| MSTRG. 37483. 1  |              | XLOC_040125 | 252 coding   | noncoding | noncoding | noncoding |
| MSTRG. 37484. 1  |              | XLOC_040126 | 371 coding   | noncoding | noncoding | noncoding |
| NM_001270943. 2  | KLF7         | XLOC_040163 | 7990 coding  | coding    | coding    | coding    |
| MSTRG. 37913. 4  | CREB1        | XLOC_040211 | 10281 coding | coding    | coding    | noncoding |
| MSTRG. 37566. 1  | LOC100507443 | XLOC_040233 | 279 coding   | noncoding | noncoding | noncoding |
| MSTRG. 37678. 1  |              | XLOC_040257 | 269 coding   | noncoding | noncoding | noncoding |
| MSTRG. 37584. 1  |              | XLOC_040272 | 236 coding   | noncoding | noncoding | noncoding |
| MSTRG. 37633. 1  | UNC80        | XLOC_040293 | 301 coding   | noncoding | noncoding | noncoding |
| MSTRG. 37636. 1  | UNC80        | XLOC_040295 | 274 coding   | noncoding | noncoding | noncoding |
| MSTRG. 37819. 9  | KANSL1L      | XLOC_040296 | 5849 coding  | coding    | noncoding | noncoding |
| XM_005246517. 4  | ACADL        | XLOC_040299 | 2944 coding  | coding    | coding    | coding    |
| MSTRG. 37758. 1  |              | XLOC_040332 | 231 coding   | noncoding | noncoding | noncoding |
| MSTRG. 37783. 1  | ERBB4        | XLOC_040336 | 323 coding   | noncoding | noncoding | noncoding |

|                 |              |             |             |           |           |           |
|-----------------|--------------|-------------|-------------|-----------|-----------|-----------|
| MSTRG. 37788. 1 | ERBB4        | XLOC_040340 | 314 coding  | noncoding | coding    | noncoding |
| MSTRG. 37800. 1 | ERBB4        | XLOC_040344 | 505 coding  | noncoding | noncoding | noncoding |
| MSTRG. 37767. 1 |              | XLOC_040357 | 223 coding  | noncoding | noncoding | noncoding |
| MSTRG. 38211. 1 |              | XLOC_040359 | 764 coding  | noncoding | noncoding | noncoding |
| XM_005246384. 5 | IKZF2        | XLOC_040377 | 9528 coding | coding    | coding    | coding    |
| NR_146974. 1    | LINC01953    | XLOC_040409 | 694 coding  | noncoding | noncoding | noncoding |
| MSTRG. 37999. 1 | SPAG16       | XLOC_040427 | 256 coding  | coding    | noncoding | noncoding |
| MSTRG. 38004. 1 | SPAG16       | XLOC_040429 | 302 coding  | noncoding | noncoding | noncoding |
| MSTRG. 38006. 1 | SPAG16       | XLOC_040431 | 216 coding  | noncoding | noncoding | noncoding |
| MSTRG. 38014. 1 | SPAG16       | XLOC_040435 | 255 coding  | noncoding | coding    | noncoding |
| MSTRG. 37971. 1 |              | XLOC_040448 | 247 coding  | noncoding | noncoding | noncoding |
| MSTRG. 38090. 1 | ABCA12       | XLOC_040475 | 296 coding  | noncoding | noncoding | noncoding |
| MSTRG. 38153. 1 | FN1          | XLOC_040485 | 439 coding  | noncoding | noncoding | noncoding |
| MSTRG. 38165. 1 | FN1          | XLOC_040488 | 223 coding  | noncoding | noncoding | noncoding |
| MSTRG. 38108. 1 |              | XLOC_040512 | 239 coding  | noncoding | noncoding | noncoding |
| MSTRG. 38113. 1 |              | XLOC_040514 | 329 coding  | noncoding | noncoding | noncoding |
| XM_024452999. 1 | PECR         | XLOC_040520 | 4669 coding | coding    | coding    | coding    |
| MSTRG. 38367. 1 |              | XLOC_040538 | 240 coding  | noncoding | noncoding | noncoding |
| MSTRG. 38336. 1 |              | XLOC_040552 | 263 coding  | noncoding | noncoding | noncoding |
| MSTRG. 38412. 1 | TNS1         | XLOC_040589 | 337 coding  | noncoding | noncoding | noncoding |
| MSTRG. 38595. 1 | PNKD         | XLOC_040624 | 276 coding  | noncoding | noncoding | noncoding |
| MSTRG. 38617. 3 | CTDSP1       | XLOC_040636 | 2536 coding | coding    | coding    | coding    |
| MSTRG. 38570. 1 | USP37        | XLOC_040642 | 294 coding  | noncoding | noncoding | noncoding |
| MSTRG. 38572. 1 | USP37        | XLOC_040644 | 237 coding  | noncoding | noncoding | noncoding |
| MSTRG. 38563. 1 |              | XLOC_040647 | 228 coding  | noncoding | noncoding | noncoding |
| MSTRG. 38661. 1 | ZNF142       | XLOC_040652 | 243 coding  | noncoding | noncoding | noncoding |
| MSTRG. 38667. 1 | RNF25        | XLOC_040656 | 279 coding  | noncoding | noncoding | noncoding |
| MSTRG. 38626. 6 | TTL4         | XLOC_040660 | 1104 coding | noncoding | noncoding | coding    |
| MSTRG. 38640. 1 |              | XLOC_040671 | 257 coding  | coding    | noncoding | noncoding |
| MSTRG. 38646. 1 | LINC01494    | XLOC_040678 | 259 coding  | noncoding | noncoding | noncoding |
| MSTRG. 38690. 1 | RETREG2      | XLOC_040694 | 4544 coding | noncoding | coding    | noncoding |
| MSTRG. 38676. 1 |              | XLOC_040696 | 241 coding  | noncoding | noncoding | noncoding |
| MSTRG. 38696. 1 | LOC105373883 | XLOC_040710 | 304 coding  | noncoding | noncoding | noncoding |
| MSTRG. 38733. 1 | SPG          | XLOC_040714 | 240 coding  | noncoding | noncoding | noncoding |
| XM_017003696. 2 | OBSL1        | XLOC_040720 | 6582 coding | coding    | coding    | coding    |
| MSTRG. 38708. 1 |              | XLOC_040722 | 250 coding  | noncoding | noncoding | noncoding |
| MSTRG. 38765. 1 | LOC105373893 | XLOC_040748 | 217 coding  | coding    | noncoding | noncoding |
| MSTRG. 38767. 1 | LOC105373893 | XLOC_040749 | 264 coding  | noncoding | noncoding | noncoding |
| MSTRG. 38828. 1 | LOC107985988 | XLOC_040761 | 278 coding  | noncoding | noncoding | noncoding |
| MSTRG. 38876. 1 | EPHA4        | XLOC_040778 | 252 coding  | noncoding | noncoding | noncoding |
| MSTRG. 38879. 1 | EPHA4        | XLOC_040781 | 294 coding  | noncoding | noncoding | noncoding |
| MSTRG. 38866. 1 | PAX3         | XLOC_040796 | 320 coding  | noncoding | noncoding | noncoding |
| MSTRG. 38867. 1 | PAX3         | XLOC_040797 | 286 coding  | noncoding | noncoding | noncoding |

|                  |              |             |              |           |           |           |
|------------------|--------------|-------------|--------------|-----------|-----------|-----------|
| MSTRG. 38908. 1  | LOC105373903 | XLOC_040823 | 237 coding   | noncoding | noncoding | noncoding |
| MSTRG. 38962. 3  | ACSL3        | XLOC_040825 | 2798 coding  | coding    | coding    | noncoding |
| MSTRG. 38934. 1  |              | XLOC_040837 | 229 coding   | noncoding | noncoding | noncoding |
| MSTRG. 39029. 1  |              | XLOC_040871 | 430 coding   | noncoding | noncoding | noncoding |
| MSTRG. 39036. 1  |              | XLOC_040872 | 291 coding   | noncoding | noncoding | noncoding |
| MSTRG. 39059. 1  | CUL3         | XLOC_040880 | 218 coding   | coding    | noncoding | noncoding |
| MSTRG. 39040. 1  |              | XLOC_040908 | 307 coding   | noncoding | noncoding | noncoding |
| MSTRG. 39046. 1  |              | XLOC_040913 | 258 coding   | noncoding | noncoding | noncoding |
| NM_001363762. 1  | DOCK10       | XLOC_040914 | 7290 coding  | coding    | coding    | coding    |
| MSTRG. 39128. 1  | NYAP2        | XLOC_040991 | 276 coding   | noncoding | noncoding | noncoding |
| MSTRG. 39109. 1  |              | XLOC_040996 | 271 coding   | noncoding | noncoding | noncoding |
| MSTRG. 39371. 18 | RHBDD1       | XLOC_041021 | 1349 coding  | coding    | noncoding | noncoding |
| NR_102371. 1     | LOC654841    | XLOC_041033 | 2502 coding  | noncoding | coding    | noncoding |
| MSTRG. 39421. 1  | COL4A3       | XLOC_041038 | 291 coding   | noncoding | noncoding | noncoding |
| MSTRG. 39425. 1  | COL4A3       | XLOC_041040 | 230 coding   | noncoding | noncoding | noncoding |
| NR_149019. 1     | LOC729968    | XLOC_041056 | 1412 coding  | noncoding | coding    | coding    |
| MSTRG. 39275. 1  |              | XLOC_041058 | 265 coding   | noncoding | noncoding | noncoding |
| MSTRG. 39286. 1  |              | XLOC_041064 | 253 coding   | noncoding | noncoding | noncoding |
| XR_001739909. 1  | LOC107985993 | XLOC_041068 | 6081 coding  | coding    | noncoding | noncoding |
| MSTRG. 39331. 1  |              | XLOC_041077 | 240 coding   | noncoding | noncoding | noncoding |
| NM_001348324. 2  | TRIP12       | XLOC_041113 | 10196 coding | coding    | coding    | coding    |
| NM_001348315. 2  | TRIP12       | XLOC_041113 | 10408 coding | coding    | coding    | coding    |
| NM_001348323. 1  | TRIP12       | XLOC_041113 | 10100 coding | coding    | coding    | coding    |
| NM_001348328. 1  | TRIP12       | XLOC_041113 | 10103 coding | coding    | coding    | coding    |
| XM_005246961. 4  | TRIP12       | XLOC_041113 | 7432 coding  | coding    | coding    | coding    |
| MSTRG. 39484. 1  | FBXO36       | XLOC_041130 | 271 coding   | noncoding | noncoding | noncoding |
| MSTRG. 39494. 1  | FBXO36       | XLOC_041136 | 221 coding   | noncoding | noncoding | noncoding |
| XM_005246525. 4  | SP110        | XLOC_041146 | 6069 coding  | coding    | coding    | coding    |
| XM_024452851. 1  | SP110        | XLOC_041146 | 1809 coding  | coding    | coding    | coding    |
| NM_004510. 4     | SP110        | XLOC_041146 | 1952 coding  | coding    | coding    | coding    |
| MSTRG. 39905. 8  | SP100        | XLOC_041163 | 4454 coding  | coding    | noncoding | noncoding |
| MSTRG. 39496. 1  |              | XLOC_041167 | 311 coding   | noncoding | noncoding | noncoding |
| MSTRG. 39501. 1  |              | XLOC_041168 | 237 coding   | noncoding | noncoding | noncoding |
| MSTRG. 39511. 1  |              | XLOC_041172 | 247 coding   | noncoding | noncoding | noncoding |
| MSTRG. 39512. 1  |              | XLOC_041174 | 281 coding   | noncoding | noncoding | noncoding |
| MSTRG. 39554. 1  | ARMC9        | XLOC_041184 | 321 coding   | noncoding | noncoding | noncoding |
| MSTRG. 39538. 1  |              | XLOC_041194 | 208 coding   | noncoding | noncoding | noncoding |
| MSTRG. 39541. 1  |              | XLOC_041197 | 341 coding   | noncoding | noncoding | noncoding |
| XM_006712195. 3  | NMUR1        | XLOC_041207 | 1676 coding  | coding    | coding    | coding    |
| MSTRG. 39586. 1  | LOC105376787 | XLOC_041208 | 263 coding   | noncoding | noncoding | noncoding |
| MSTRG. 39604. 1  |              | XLOC_041215 | 263 coding   | noncoding | noncoding | noncoding |
| MSTRG. 39607. 1  |              | XLOC_041218 | 258 coding   | noncoding | noncoding | noncoding |
| XM_011511245. 3  | NPPC         | XLOC_041233 | 2700 coding  | coding    | coding    | noncoding |

|                 |              |             |              |           |           |           |
|-----------------|--------------|-------------|--------------|-----------|-----------|-----------|
| MSTRG. 39645. 1 | EFHD1        | XLOC_041255 | 272 coding   | noncoding | noncoding | noncoding |
| MSTRG. 39649. 1 | EFHD1        | XLOC_041258 | 294 coding   | noncoding | noncoding | noncoding |
| MSTRG. 39732. 1 | UGT1A8       | XLOC_041284 | 263 coding   | noncoding | noncoding | noncoding |
| MSTRG. 39786. 1 |              | XLOC_041304 | 260 coding   | noncoding | noncoding | noncoding |
| MSTRG. 39821. 1 |              | XLOC_041318 | 229 coding   | noncoding | noncoding | noncoding |
| MSTRG. 39824. 1 | LOC101927896 | XLOC_041320 | 272 coding   | noncoding | noncoding | noncoding |
| MSTRG. 39853. 1 | SH3BP4       | XLOC_041329 | 241 coding   | noncoding | coding    | noncoding |
| MSTRG. 40036. 1 | AGAP1        | XLOC_041343 | 491 coding   | noncoding | noncoding | noncoding |
| MSTRG. 40037. 1 | AGAP1        | XLOC_041344 | 300 coding   | noncoding | noncoding | noncoding |
| MSTRG. 40096. 1 | AGAP1        | XLOC_041377 | 256 coding   | coding    | coding    | noncoding |
| MSTRG. 39934. 1 | IQCA1        | XLOC_041392 | 317 coding   | noncoding | noncoding | noncoding |
| NM_004369. 3    | COL6A3       | XLOC_041431 | 10581 coding | coding    | noncoding | coding    |
| MSTRG. 40126. 1 | COL6A3       | XLOC_041435 | 322 coding   | noncoding | noncoding | noncoding |
| MSTRG. 40020. 1 |              | XLOC_041436 | 268 coding   | noncoding | noncoding | noncoding |
| MSTRG. 40128. 1 |              | XLOC_041443 | 376 coding   | noncoding | noncoding | noncoding |
| MSTRG. 40131. 1 |              | XLOC_041472 | 223 coding   | noncoding | noncoding | noncoding |
| MSTRG. 40176. 1 | ILKAP        | XLOC_041486 | 356 coding   | noncoding | noncoding | noncoding |
| NR_026925. 1    | LINC02610    | XLOC_041488 | 1959 coding  | noncoding | coding    | coding    |
| MSTRG. 40231. 1 | PER2         | XLOC_041492 | 277 coding   | noncoding | noncoding | noncoding |
| MSTRG. 40271. 1 |              | XLOC_041522 | 249 coding   | noncoding | noncoding | noncoding |
| MSTRG. 40279. 1 |              | XLOC_041525 | 421 coding   | noncoding | noncoding | noncoding |
| MSTRG. 40289. 1 |              | XLOC_041531 | 248 coding   | noncoding | noncoding | noncoding |
| XM_011512230. 1 | HDAC4        | XLOC_041533 | 7862 coding  | coding    | coding    | coding    |
| MSTRG. 40540. 1 | HDAC4        | XLOC_041539 | 206 coding   | noncoding | noncoding | noncoding |
| MSTRG. 40550. 1 | HDAC4        | XLOC_041547 | 296 coding   | noncoding | noncoding | noncoding |
| NM_001005853. 1 | OR6B2        | XLOC_041587 | 939 coding   | coding    | coding    | coding    |
| MSTRG. 40445. 2 | RNPEPL1      | XLOC_041614 | 3654 coding  | coding    | coding    | noncoding |
| NM_001085437. 3 | MAB21L4      | XLOC_041634 | 2525 coding  | coding    | coding    | coding    |
| MSTRG. 40407. 1 | CROCC2       | XLOC_041640 | 280 coding   | noncoding | noncoding | noncoding |
| MSTRG. 40456. 1 | PASK         | XLOC_041664 | 226 coding   | noncoding | noncoding | noncoding |
| MSTRG. 40517. 1 | FARP2        | XLOC_041686 | 248 coding   | noncoding | noncoding | noncoding |
| MSTRG. 40488. 1 |              | XLOC_041696 | 281 coding   | noncoding | noncoding | noncoding |
| XR_001739970. 2 | LOC105373975 | XLOC_041699 | 865 coding   | noncoding | noncoding | noncoding |
| XR_001739971. 2 | LOC105373975 | XLOC_041699 | 2822 coding  | noncoding | noncoding | noncoding |
| MSTRG. 40602. 8 | ATG4B        | XLOC_041701 | 928 coding   | coding    | coding    | coding    |
| MSTRG. 40638. 1 | LOC107986057 | XLOC_041742 | 316 coding   | noncoding | noncoding | noncoding |
| MSTRG. 40644. 1 |              | XLOC_041758 | 594 coding   | noncoding | noncoding | noncoding |
| XR_001740584. 1 | LOC107986058 | XLOC_041759 | 8296 coding  | coding    | coding    | noncoding |
| MSTRG. 40692. 1 | CNTN6        | XLOC_041770 | 222 coding   | noncoding | noncoding | noncoding |
| MSTRG. 40696. 1 | CNTN6        | XLOC_041773 | 325 coding   | noncoding | noncoding | noncoding |
| MSTRG. 40676. 1 |              | XLOC_041776 | 225 coding   | noncoding | noncoding | noncoding |
| XM_011533428. 2 | CNTN4        | XLOC_041779 | 6482 coding  | coding    | coding    | coding    |
| MSTRG. 40736. 1 | CNTN4        | XLOC_041786 | 415 coding   | noncoding | noncoding | noncoding |

|                  |              |             |              |           |           |           |
|------------------|--------------|-------------|--------------|-----------|-----------|-----------|
| MSTRG. 40743. 1  | CNTN4        | XLOC_041790 | 258 coding   | noncoding | noncoding | noncoding |
| MSTRG. 40748. 1  | CNTN4        | XLOC_041794 | 318 coding   | noncoding | noncoding | noncoding |
| MSTRG. 40786. 1  | BHLHE40-AS1  | XLOC_041953 | 527 coding   | noncoding | noncoding | noncoding |
| MSTRG. 40779. 1  | LOC105376934 | XLOC_041967 | 268 coding   | noncoding | noncoding | noncoding |
| MSTRG. 40780. 1  | LOC105376934 | XLOC_041968 | 303 coding   | noncoding | noncoding | noncoding |
| MSTRG. 40808. 1  |              | XLOC_041979 | 261 coding   | noncoding | noncoding | noncoding |
| MSTRG. 40897. 1  |              | XLOC_042007 | 221 coding   | noncoding | noncoding | noncoding |
| XR_001740415. 1  | LOC105376944 | XLOC_042009 | 2379 coding  | noncoding | noncoding | noncoding |
| MSTRG. 40911. 1  |              | XLOC_042039 | 269 coding   | noncoding | noncoding | noncoding |
| MSTRG. 40923. 1  |              | XLOC_042050 | 325 coding   | coding    | noncoding | noncoding |
| MSTRG. 41125. 1  | SETD5        | XLOC_042099 | 210 coding   | noncoding | noncoding | noncoding |
| MSTRG. 41084. 1  | LHFPL4       | XLOC_042102 | 218 coding   | noncoding | noncoding | noncoding |
| MSTRG. 41086. 1  | LOC105376949 | XLOC_042103 | 276 coding   | noncoding | noncoding | noncoding |
| MSTRG. 41089. 1  | CPNE9        | XLOC_042110 | 214 coding   | noncoding | noncoding | noncoding |
| MSTRG. 41172. 1  | RPUSD3       | XLOC_042114 | 258 coding   | noncoding | noncoding | noncoding |
| MSTRG. 41160. 1  | IRAK2        | XLOC_042137 | 256 coding   | noncoding | noncoding | noncoding |
| MSTRG. 41190. 1  |              | XLOC_042158 | 259 coding   | noncoding | noncoding | noncoding |
| XM_011534033. 2  | SLC6A11      | XLOC_042159 | 3250 coding  | coding    | coding    | coding    |
| NM_001317406. 2  | SLC6A11      | XLOC_042159 | 11069 coding | coding    | coding    | coding    |
| NM_014229. 3     | SLC6A11      | XLOC_042159 | 4249 coding  | coding    | coding    | coding    |
| MSTRG. 41224. 1  |              | XLOC_042166 | 249 coding   | noncoding | noncoding | noncoding |
| MSTRG. 41364. 1  | LOC102723663 | XLOC_042174 | 243 coding   | noncoding | noncoding | noncoding |
| MSTRG. 41367. 1  | LOC102723663 | XLOC_042176 | 232 coding   | noncoding | noncoding | noncoding |
| NM_001349233. 2  | ATG7         | XLOC_042178 | 5087 coding  | coding    | coding    | coding    |
| XM_006712933. 3  | ATG7         | XLOC_042178 | 2615 coding  | coding    | coding    | coding    |
| MSTRG. 41396. 1  | TAMM41       | XLOC_042181 | 240 coding   | noncoding | noncoding | noncoding |
| MSTRG. 41388. 1  | SYN2         | XLOC_042194 | 239 coding   | noncoding | noncoding | noncoding |
| MSTRG. 41384. 1  |              | XLOC_042200 | 270 coding   | noncoding | noncoding | noncoding |
| MSTRG. 41419. 1  |              | XLOC_042203 | 340 coding   | noncoding | noncoding | noncoding |
| XM_024453784. 1  | TSEN2        | XLOC_042204 | 2003 coding  | coding    | coding    | coding    |
| XR_940599. 2     | LOC105376956 | XLOC_042213 | 5188 coding  | noncoding | coding    | noncoding |
| MSTRG. 41482. 9  | IQSEC1       | XLOC_042213 | 3963 coding  | coding    | coding    | noncoding |
| MSTRG. 41446. 1  |              | XLOC_042243 | 280 coding   | noncoding | noncoding | noncoding |
| MSTRG. 41448. 1  |              | XLOC_042244 | 249 coding   | noncoding | noncoding | noncoding |
| MSTRG. 41450. 1  |              | XLOC_042252 | 316 coding   | noncoding | noncoding | noncoding |
| NM_001165035. 2  | FBLN2        | XLOC_042256 | 4563 coding  | coding    | coding    | coding    |
| MSTRG. 41553. 1  | TPRXL        | XLOC_042272 | 429 coding   | noncoding | coding    | noncoding |
| NR_103507. 2     | SLC6A6       | XLOC_042288 | 6405 coding  | coding    | coding    | coding    |
| MSTRG. 41651. 1  | GRIP2        | XLOC_042296 | 272 coding   | noncoding | noncoding | noncoding |
| MSTRG. 41828. 16 | BTD          | XLOC_042350 | 253 coding   | noncoding | noncoding | noncoding |
| MSTRG. 41828. 18 | BTD          | XLOC_042350 | 265 coding   | noncoding | noncoding | noncoding |
| MSTRG. 41828. 25 | ANKRD28      | XLOC_042350 | 867 coding   | noncoding | noncoding | noncoding |
| MSTRG. 41904. 3  | DPH3         | XLOC_042385 | 2908 coding  | coding    | noncoding | noncoding |

|                  |              |             |             |           |           |           |
|------------------|--------------|-------------|-------------|-----------|-----------|-----------|
| MSTRG. 42365. 5  | TBC1D5       | XLOC_042429 | 6386 coding | coding    | noncoding | noncoding |
| MSTRG. 42365. 9  | TBC1D5       | XLOC_042429 | 867 coding  | noncoding | noncoding | noncoding |
| MSTRG. 41889. 1  | LOC339862    | XLOC_042445 | 230 coding  | noncoding | noncoding | noncoding |
| MSTRG. 41974. 1  |              | XLOC_042464 | 641 coding  | noncoding | noncoding | noncoding |
| MSTRG. 41999. 1  |              | XLOC_042490 | 254 coding  | noncoding | noncoding | noncoding |
| MSTRG. 42067. 1  | RAB5A        | XLOC_042501 | 321 coding  | noncoding | noncoding | noncoding |
| MSTRG. 42073. 1  | PP2D1        | XLOC_042506 | 300 coding  | coding    | noncoding | noncoding |
| XR_001740351. 1  | KAT2B        | XLOC_042508 | 4319 coding | coding    | coding    | coding    |
| XM_005265528. 4  | KAT2B        | XLOC_042508 | 4361 coding | coding    | coding    | coding    |
| MSTRG. 42189. 1  |              | XLOC_042535 | 348 coding  | coding    | noncoding | noncoding |
| MSTRG. 42217. 1  | LOC105376988 | XLOC_042543 | 295 coding  | noncoding | noncoding | noncoding |
| MSTRG. 42219. 1  | LOC105376988 | XLOC_042544 | 248 coding  | noncoding | noncoding | noncoding |
| MSTRG. 42294. 1  | ZNF385D      | XLOC_042562 | 276 coding  | noncoding | noncoding | noncoding |
| MSTRG. 42233. 1  |              | XLOC_042574 | 238 coding  | noncoding | noncoding | noncoding |
| MSTRG. 42245. 1  |              | XLOC_042579 | 218 coding  | noncoding | noncoding | noncoding |
| MSTRG. 42258. 1  |              | XLOC_042588 | 216 coding  | coding    | noncoding | noncoding |
| MSTRG. 42260. 1  |              | XLOC_042589 | 260 coding  | noncoding | noncoding | noncoding |
| NM_001370226. 1  | UBE2E2       | XLOC_042594 | 3222 coding | coding    | coding    | coding    |
| MSTRG. 42730. 1  | UBE2E2       | XLOC_042601 | 223 coding  | noncoding | noncoding | noncoding |
| XR_940652. 3     | LOC105376993 | XLOC_042627 | 3238 coding | noncoding | noncoding | noncoding |
| MSTRG. 42320. 1  |              | XLOC_042630 | 262 coding  | noncoding | noncoding | noncoding |
| MSTRG. 42345. 1  | UBE2E1       | XLOC_042639 | 325 coding  | noncoding | noncoding | noncoding |
| MSTRG. 42331. 1  |              | XLOC_042652 | 288 coding  | noncoding | noncoding | noncoding |
| MSTRG. 42338. 1  |              | XLOC_042654 | 256 coding  | noncoding | noncoding | noncoding |
| MSTRG. 42561. 14 | TOP2B        | XLOC_042687 | 5503 coding | coding    | coding    | coding    |
| MSTRG. 42561. 15 | TOP2B        | XLOC_042687 | 5281 coding | coding    | noncoding | coding    |
| MSTRG. 42529. 1  |              | XLOC_042698 | 303 coding  | noncoding | noncoding | noncoding |
| MSTRG. 42550. 1  |              | XLOC_042709 | 262 coding  | noncoding | noncoding | noncoding |
| MSTRG. 42602. 1  |              | XLOC_042715 | 235 coding  | coding    | noncoding | noncoding |
| XM_017005675. 1  | LRRC3B       | XLOC_042719 | 7522 coding | coding    | coding    | coding    |
| MSTRG. 42660. 1  |              | XLOC_042739 | 231 coding  | noncoding | noncoding | noncoding |
| MSTRG. 42663. 1  |              | XLOC_042741 | 253 coding  | noncoding | noncoding | noncoding |
| MSTRG. 42832. 1  | CMC1         | XLOC_042759 | 255 coding  | noncoding | noncoding | noncoding |
| MSTRG. 42756. 1  |              | XLOC_042772 | 209 coding  | noncoding | noncoding | noncoding |
| MSTRG. 42932. 1  | GADL1        | XLOC_042829 | 306 coding  | noncoding | noncoding | noncoding |
| MSTRG. 42937. 1  |              | XLOC_042834 | 356 coding  | noncoding | noncoding | noncoding |
| MSTRG. 42940. 1  |              | XLOC_042836 | 238 coding  | noncoding | noncoding | noncoding |
| MSTRG. 42952. 1  |              | XLOC_042844 | 355 coding  | coding    | noncoding | noncoding |
| MSTRG. 42998. 1  |              | XLOC_042902 | 257 coding  | coding    | coding    | noncoding |
| MSTRG. 43112. 1  |              | XLOC_042948 | 298 coding  | noncoding | noncoding | noncoding |
| MSTRG. 43181. 1  | CNOT10       | XLOC_042951 | 242 coding  | noncoding | noncoding | noncoding |
| MSTRG. 43163. 1  |              | XLOC_042954 | 232 coding  | noncoding | noncoding | noncoding |
| NM_001039111. 3  | TRIM71       | XLOC_042955 | 8704 coding | coding    | coding    | coding    |

|                 |              |             |              |           |           |           |
|-----------------|--------------|-------------|--------------|-----------|-----------|-----------|
| MSTRG. 43169. 1 | TRIM71       | XLOC_042956 | 267 coding   | coding    | noncoding | noncoding |
| NM_005508. 5    | CCR4         | XLOC_042957 | 3025 coding  | coding    | coding    | coding    |
| MSTRG. 43198. 1 |              | XLOC_042962 | 500 coding   | noncoding | noncoding | noncoding |
| MSTRG. 43202. 1 |              | XLOC_042968 | 300 coding   | noncoding | noncoding | noncoding |
| MSTRG. 43227. 1 |              | XLOC_042978 | 290 coding   | noncoding | noncoding | noncoding |
| MSTRG. 43237. 1 |              | XLOC_042984 | 278 coding   | noncoding | noncoding | noncoding |
| MSTRG. 43250. 1 |              | XLOC_043000 | 217 coding   | noncoding | noncoding | noncoding |
| MSTRG. 43304. 1 |              | XLOC_043004 | 317 coding   | noncoding | noncoding | noncoding |
| XM_017005575. 2 | ARPP21       | XLOC_043020 | 15101 coding | coding    | coding    | coding    |
| MSTRG. 43376. 1 | ARPP21       | XLOC_043022 | 281 coding   | noncoding | noncoding | noncoding |
| MSTRG. 43368. 1 |              | XLOC_043032 | 239 coding   | noncoding | noncoding | noncoding |
| MSTRG. 43398. 1 |              | XLOC_043042 | 535 coding   | coding    | noncoding | noncoding |
| MSTRG. 43401. 1 |              | XLOC_043052 | 229 coding   | noncoding | noncoding | noncoding |
| MSTRG. 43721. 1 | C3orf35      | XLOC_043081 | 244 coding   | noncoding | noncoding | noncoding |
| MSTRG. 43726. 1 | C3orf35      | XLOC_043083 | 242 coding   | noncoding | noncoding | noncoding |
| MSTRG. 43738. 1 | C3orf35      | XLOC_043084 | 284 coding   | coding    | noncoding | noncoding |
| MSTRG. 43444. 1 | ITGA9        | XLOC_043093 | 292 coding   | noncoding | noncoding | noncoding |
| MSTRG. 43470. 1 | CTDSPL       | XLOC_043105 | 283 coding   | noncoding | noncoding | noncoding |
| MSTRG. 43474. 1 |              | XLOC_043112 | 286 coding   | noncoding | noncoding | noncoding |
| MSTRG. 43499. 1 |              | XLOC_043126 | 277 coding   | noncoding | noncoding | noncoding |
| MSTRG. 43506. 1 |              | XLOC_043132 | 265 coding   | noncoding | noncoding | noncoding |
| XR_001740393. 2 | XYLB         | XLOC_043134 | 1390 coding  | coding    | coding    | coding    |
| MSTRG. 43547. 1 | XYLB         | XLOC_043135 | 274 coding   | noncoding | noncoding | noncoding |
| MSTRG. 43553. 1 | XYLB         | XLOC_043136 | 270 coding   | noncoding | noncoding | noncoding |
| MSTRG. 43567. 1 | XYLB         | XLOC_043138 | 227 coding   | noncoding | noncoding | noncoding |
| MSTRG. 43570. 1 | XYLB         | XLOC_043140 | 305 coding   | noncoding | noncoding | noncoding |
| MSTRG. 43616. 1 | SCN11A       | XLOC_043152 | 377 coding   | noncoding | noncoding | noncoding |
| NM_001346228. 1 | WDR48        | XLOC_043154 | 4224 coding  | coding    | coding    | coding    |
| MSTRG. 43598. 6 | CX3CR1       | XLOC_043165 | 3260 coding  | coding    | coding    | coding    |
| MSTRG. 43604. 1 |              | XLOC_043174 | 309 coding   | noncoding | noncoding | noncoding |
| MSTRG. 43835. 1 | MYRIP        | XLOC_043187 | 268 coding   | noncoding | noncoding | noncoding |
| MSTRG. 43753. 1 | ENTPD3-AS1   | XLOC_043251 | 212 coding   | noncoding | noncoding | noncoding |
| MSTRG. 43819. 1 | LOC105377043 | XLOC_043277 | 235 coding   | noncoding | noncoding | noncoding |
| MSTRG. 43804. 1 |              | XLOC_043285 | 309 coding   | noncoding | noncoding | noncoding |
| XM_024453356. 1 | CTNNB1       | XLOC_043287 | 3594 coding  | coding    | coding    | coding    |
| MSTRG. 43940. 1 | TRAK1        | XLOC_043373 | 253 coding   | noncoding | noncoding | noncoding |
| MSTRG. 43911. 1 |              | XLOC_043383 | 282 coding   | noncoding | noncoding | noncoding |
| MSTRG. 43919. 1 |              | XLOC_043387 | 291 coding   | noncoding | noncoding | noncoding |
| MSTRG. 43921. 1 |              | XLOC_043388 | 575 coding   | noncoding | noncoding | noncoding |
| MSTRG. 43922. 1 |              | XLOC_043389 | 297 coding   | noncoding | noncoding | noncoding |
| MSTRG. 43972. 1 | HHATL        | XLOC_043400 | 450 coding   | noncoding | noncoding | noncoding |
| MSTRG. 43985. 1 | CCDC13       | XLOC_043411 | 246 coding   | noncoding | noncoding | noncoding |
| MSTRG. 43969. 1 |              | XLOC_043430 | 245 coding   | noncoding | noncoding | noncoding |

|                 |          |             |             |           |           |           |
|-----------------|----------|-------------|-------------|-----------|-----------|-----------|
| MSTRG. 43993. 1 |          | XLOC_043441 | 255 coding  | noncoding | noncoding | noncoding |
| NM_001355186. 2 | ABHD5    | XLOC_043482 | 1456 coding | coding    | coding    | coding    |
| XM_011533694. 2 | TOPAZ1   | XLOC_043501 | 5637 coding | coding    | coding    | coding    |
| NM_001258280. 2 | ZNF501   | XLOC_043519 | 3353 coding | coding    | noncoding | coding    |
| NM_144638. 3    | TMEM42   | XLOC_043523 | 977 coding  | noncoding | coding    | coding    |
| MSTRG. 44256. 1 | CDCP1    | XLOC_043530 | 704 coding  | noncoding | noncoding | noncoding |
| MSTRG. 44282. 1 | LARS2    | XLOC_043545 | 282 coding  | noncoding | noncoding | noncoding |
| MSTRG. 44467. 1 | ALS2CL   | XLOC_043637 | 214 coding  | noncoding | noncoding | noncoding |
| NM_001370524. 1 | TMIE     | XLOC_043641 | 2417 coding | coding    | coding    | noncoding |
| MSTRG. 44459. 1 |          | XLOC_043644 | 327 coding  | noncoding | noncoding | noncoding |
| MSTRG. 44577. 5 | CCDC12   | XLOC_043651 | 795 coding  | coding    | noncoding | noncoding |
| MSTRG. 44600. 1 | KIF9-AS1 | XLOC_043660 | 314 coding  | noncoding | noncoding | noncoding |
| MSTRG. 44493. 1 |          | XLOC_043687 | 217 coding  | noncoding | noncoding | noncoding |
| MSTRG. 44517. 1 |          | XLOC_043694 | 246 coding  | noncoding | noncoding | noncoding |
| MSTRG. 44541. 1 |          | XLOC_043704 | 355 coding  | noncoding | noncoding | noncoding |
| MSTRG. 44635. 1 | NCKIPSD  | XLOC_043722 | 670 coding  | noncoding | noncoding | noncoding |
| MSTRG. 44639. 1 |          | XLOC_043728 | 294 coding  | noncoding | noncoding | noncoding |
| MSTRG. 44680. 1 | P4HTM    | XLOC_043742 | 325 coding  | noncoding | noncoding | noncoding |
| MSTRG. 44672. 1 |          | XLOC_043751 | 412 coding  | noncoding | noncoding | noncoding |
| MSTRG. 44702. 1 | C3orf84  | XLOC_043758 | 389 coding  | noncoding | noncoding | noncoding |
| XM_011533672. 2 | CCDC36   | XLOC_043759 | 2683 coding | coding    | coding    | coding    |
| MSTRG. 44717. 1 | CCDC36   | XLOC_043760 | 253 coding  | noncoding | noncoding | noncoding |
| MSTRG. 44718. 1 | CCDC36   | XLOC_043761 | 273 coding  | noncoding | noncoding | noncoding |
| MSTRG. 44719. 1 |          | XLOC_043762 | 308 coding  | noncoding | noncoding | noncoding |
| MSTRG. 44721. 1 |          | XLOC_043764 | 256 coding  | noncoding | noncoding | noncoding |
| MSTRG. 44714. 1 | DAG1     | XLOC_043774 | 367 coding  | noncoding | noncoding | noncoding |
| MSTRG. 44708. 1 |          | XLOC_043775 | 222 coding  | noncoding | noncoding | noncoding |
| MSTRG. 44751. 1 | BSN      | XLOC_043777 | 270 coding  | noncoding | noncoding | noncoding |
| MSTRG. 44796. 1 | RBM6     | XLOC_043795 | 287 coding  | noncoding | noncoding | noncoding |
| MSTRG. 44801. 1 | RBM6     | XLOC_043799 | 237 coding  | noncoding | noncoding | noncoding |
| MSTRG. 44804. 1 | RBM6     | XLOC_043801 | 325 coding  | noncoding | noncoding | noncoding |
| NM_144499. 3    | GNAT1    | XLOC_043807 | 3599 coding | coding    | coding    | coding    |
| XM_006712954. 3 | SLC38A3  | XLOC_043808 | 3012 coding | coding    | coding    | coding    |
| MSTRG. 44771. 1 |          | XLOC_043809 | 321 coding  | noncoding | noncoding | noncoding |
| NM_001290060. 2 | SEMA3B   | XLOC_043815 | 3184 coding | coding    | coding    | coding    |
| NR_111913. 2    | CYB561D2 | XLOC_043822 | 932 coding  | coding    | noncoding | noncoding |
| MSTRG. 44829. 1 | HEMK1    | XLOC_043843 | 295 coding  | noncoding | noncoding | noncoding |
| MSTRG. 44970. 1 | DOCK3    | XLOC_043853 | 290 coding  | noncoding | noncoding | noncoding |
| MSTRG. 44972. 1 | DOCK3    | XLOC_043855 | 271 coding  | noncoding | noncoding | noncoding |
| MSTRG. 44978. 1 | DOCK3    | XLOC_043857 | 270 coding  | noncoding | noncoding | noncoding |
| MSTRG. 44990. 1 | DOCK3    | XLOC_043864 | 230 coding  | noncoding | noncoding | noncoding |
| MSTRG. 45006. 1 | DOCK3    | XLOC_043870 | 423 coding  | coding    | noncoding | noncoding |
| MSTRG. 45007. 1 | DOCK3    | XLOC_043871 | 317 coding  | noncoding | noncoding | noncoding |

|                |              |             |             |           |           |           |
|----------------|--------------|-------------|-------------|-----------|-----------|-----------|
| MSTRG.45010.1  | DOCK3        | XLOC_043873 | 307 coding  | noncoding | noncoding | noncoding |
| MSTRG.44899.1  | LOC105377085 | XLOC_043881 | 259 coding  | noncoding | noncoding | noncoding |
| XM_011533635.1 | GRM2         | XLOC_043885 | 4937 coding | coding    | coding    | coding    |
| MSTRG.44962.1  | POC1A        | XLOC_043912 | 253 coding  | noncoding | noncoding | noncoding |
| MSTRG.44952.1  |              | XLOC_043915 | 229 coding  | noncoding | noncoding | noncoding |
| NR_026699.1    | GLYCTK       | XLOC_043922 | 3800 coding | coding    | coding    | coding    |
| MSTRG.45088.1  | DNAH1        | XLOC_043924 | 217 coding  | noncoding | noncoding | noncoding |
| XM_024453589.1 | PHF7         | XLOC_043927 | 2739 coding | coding    | coding    | coding    |
| MSTRG.45032.1  | PHF7         | XLOC_043929 | 242 coding  | noncoding | noncoding | noncoding |
| MSTRG.45043.1  | NISCH        | XLOC_043934 | 289 coding  | noncoding | noncoding | noncoding |
| MSTRG.45168.7  | PBRM1        | XLOC_043940 | 8538 coding | coding    | noncoding | coding    |
| MSTRG.45053.5  | ITIH1        | XLOC_043948 | 203 coding  | noncoding | noncoding | noncoding |
| MSTRG.45157.1  |              | XLOC_043988 | 248 coding  | noncoding | noncoding | noncoding |
| MSTRG.45232.1  | CACNA1D      | XLOC_043998 | 319 coding  | noncoding | noncoding | noncoding |
| MSTRG.45193.2  | IL17RB       | XLOC_044004 | 2822 coding | coding    | coding    | coding    |
| MSTRG.45182.1  |              | XLOC_044008 | 254 coding  | noncoding | noncoding | noncoding |
| MSTRG.45289.1  | CACNA2D3     | XLOC_044017 | 270 coding  | noncoding | noncoding | noncoding |
| MSTRG.45302.1  | CACNA2D3     | XLOC_044022 | 241 coding  | noncoding | noncoding | noncoding |
| MSTRG.45365.1  | ERC2         | XLOC_044057 | 269 coding  | noncoding | noncoding | noncoding |
| MSTRG.45456.60 | TASOR        | XLOC_044069 | 5164 coding | coding    | coding    | coding    |
| MSTRG.45453.1  | DNAH12       | XLOC_044099 | 245 coding  | noncoding | noncoding | noncoding |
| MSTRG.45462.1  | DENND6A-DT   | XLOC_044115 | 268 coding  | noncoding | noncoding | noncoding |
| MSTRG.45463.1  |              | XLOC_044116 | 225 coding  | noncoding | noncoding | noncoding |
| MSTRG.45464.1  |              | XLOC_044117 | 233 coding  | noncoding | noncoding | noncoding |
| MSTRG.45512.1  | SLMAP        | XLOC_044119 | 238 coding  | noncoding | noncoding | noncoding |
| MSTRG.45499.1  | LOC105377650 | XLOC_044143 | 254 coding  | noncoding | noncoding | noncoding |
| MSTRG.45504.1  | DNASE1L3     | XLOC_044145 | 260 coding  | noncoding | noncoding | noncoding |
| XM_005265334.4 | ABHD6        | XLOC_044148 | 2463 coding | coding    | coding    | coding    |
| NM_001348712.1 | HTD2         | XLOC_044150 | 3402 coding | coding    | coding    | coding    |
| NR_146194.1    | PXK          | XLOC_044151 | 3041 coding | coding    | coding    | coding    |
| MSTRG.45543.1  |              | XLOC_044154 | 301 coding  | noncoding | noncoding | noncoding |
| MSTRG.45547.1  |              | XLOC_044155 | 350 coding  | noncoding | noncoding | noncoding |
| MSTRG.45553.1  | LOC107986092 | XLOC_044157 | 235 coding  | noncoding | noncoding | noncoding |
| MSTRG.45570.1  | ACOX2        | XLOC_044161 | 231 coding  | coding    | noncoding | noncoding |
| MSTRG.45579.1  | FAM3D        | XLOC_044166 | 212 coding  | noncoding | noncoding | noncoding |
| MSTRG.45588.1  | LOC105377109 | XLOC_044170 | 244 coding  | noncoding | noncoding | noncoding |
| MSTRG.45593.1  | C3orf67      | XLOC_044173 | 269 coding  | noncoding | noncoding | noncoding |
| MSTRG.45594.1  | C3orf67      | XLOC_044174 | 293 coding  | noncoding | noncoding | noncoding |
| MSTRG.45601.1  | C3orf67      | XLOC_044180 | 283 coding  | noncoding | noncoding | noncoding |
| MSTRG.45604.1  | C3orf67      | XLOC_044183 | 256 coding  | noncoding | noncoding | noncoding |
| MSTRG.47105.1  | FHIT         | XLOC_044222 | 216 coding  | noncoding | noncoding | noncoding |
| MSTRG.45616.1  | LOC105377114 | XLOC_044314 | 230 coding  | noncoding | noncoding | noncoding |
| MSTRG.45631.1  | PTPRG        | XLOC_044318 | 319 coding  | noncoding | noncoding | noncoding |

|                |              |             |             |           |           |           |
|----------------|--------------|-------------|-------------|-----------|-----------|-----------|
| MSTRG.45647.1  | PTPRG        | XLOC_044325 | 314 coding  | noncoding | noncoding | noncoding |
| MSTRG.45652.1  | PTPRG        | XLOC_044327 | 266 coding  | noncoding | noncoding | noncoding |
| MSTRG.45667.1  | PTPRG        | XLOC_044335 | 287 coding  | noncoding | noncoding | noncoding |
| MSTRG.45672.1  | PTPRG-AS1    | XLOC_044337 | 277 coding  | noncoding | noncoding | noncoding |
| MSTRG.45677.1  |              | XLOC_044352 | 294 coding  | noncoding | noncoding | noncoding |
| MSTRG.45692.1  | SYNPR        | XLOC_044355 | 201 coding  | noncoding | noncoding | noncoding |
| MSTRG.45696.1  | SYNPR        | XLOC_044359 | 220 coding  | noncoding | noncoding | noncoding |
| MSTRG.45697.1  | SYNPR        | XLOC_044360 | 216 coding  | noncoding | noncoding | noncoding |
| MSTRG.45714.1  | SYNPR-AS1    | XLOC_044368 | 289 coding  | noncoding | noncoding | noncoding |
| MSTRG.45779.1  | PRICKLE2     | XLOC_044408 | 207 coding  | noncoding | noncoding | noncoding |
| MSTRG.45786.1  |              | XLOC_044427 | 280 coding  | noncoding | noncoding | noncoding |
| MSTRG.45819.1  | MAGI1        | XLOC_044431 | 296 coding  | noncoding | noncoding | noncoding |
| MSTRG.45823.1  | MAGI1        | XLOC_044434 | 302 coding  | noncoding | noncoding | noncoding |
| MSTRG.45825.1  | MAGI1        | XLOC_044436 | 571 coding  | noncoding | noncoding | noncoding |
| MSTRG.45835.1  | MAGI1        | XLOC_044441 | 369 coding  | noncoding | noncoding | noncoding |
| MSTRG.45844.1  | MAGI1        | XLOC_044445 | 234 coding  | noncoding | noncoding | noncoding |
| MSTRG.45880.1  |              | XLOC_044467 | 394 coding  | noncoding | coding    | noncoding |
| MSTRG.45907.1  |              | XLOC_044479 | 325 coding  | coding    | noncoding | noncoding |
| MSTRG.45908.1  |              | XLOC_044480 | 200 coding  | noncoding | noncoding | noncoding |
| MSTRG.46273.1  | SUCLG2-AS1   | XLOC_044520 | 332 coding  | noncoding | noncoding | noncoding |
| MSTRG.46122.1  | TAF4A1       | XLOC_044561 | 274 coding  | noncoding | noncoding | noncoding |
| MSTRG.45988.1  |              | XLOC_044584 | 216 coding  | noncoding | noncoding | noncoding |
| MSTRG.46019.1  | MITF         | XLOC_044591 | 282 coding  | noncoding | noncoding | noncoding |
| MSTRG.46052.1  |              | XLOC_044611 | 245 coding  | noncoding | noncoding | noncoding |
| MSTRG.46050.1  |              | XLOC_044612 | 298 coding  | noncoding | noncoding | noncoding |
| MSTRG.47644.9  | FOXP1        | XLOC_044617 | 2982 coding | coding    | coding    | noncoding |
| MSTRG.47644.48 | EIF4E3       | XLOC_044617 | 3368 coding | coding    | noncoding | noncoding |
| MSTRG.46291.1  |              | XLOC_044653 | 256 coding  | noncoding | noncoding | noncoding |
| NM_001080393.2 | GXYLT2       | XLOC_044671 | 3276 coding | coding    | coding    | coding    |
| MSTRG.46434.1  | PDZRN3       | XLOC_044688 | 291 coding  | noncoding | noncoding | noncoding |
| MSTRG.46405.1  |              | XLOC_044699 | 263 coding  | noncoding | noncoding | noncoding |
| MSTRG.46415.1  | LINC02047    | XLOC_044705 | 279 coding  | noncoding | noncoding | noncoding |
| MSTRG.46466.1  | CNTN3        | XLOC_044711 | 246 coding  | noncoding | noncoding | noncoding |
| MSTRG.46450.1  |              | XLOC_044720 | 240 coding  | noncoding | noncoding | noncoding |
| MSTRG.46480.1  | LOC105377167 | XLOC_044725 | 289 coding  | coding    | noncoding | noncoding |
| MSTRG.46490.1  |              | XLOC_044733 | 235 coding  | noncoding | noncoding | noncoding |
| XM_017005489.2 | FRG2C        | XLOC_044739 | 2979 coding | coding    | coding    | coding    |
| MSTRG.46584.1  | ROBO2        | XLOC_044759 | 286 coding  | noncoding | noncoding | noncoding |
| MSTRG.46590.1  | ROBO2        | XLOC_044763 | 265 coding  | noncoding | noncoding | noncoding |
| MSTRG.46595.1  | ROBO2        | XLOC_044765 | 272 coding  | noncoding | noncoding | noncoding |
| MSTRG.46550.1  |              | XLOC_044809 | 255 coding  | noncoding | noncoding | noncoding |
| MSTRG.46553.1  |              | XLOC_044810 | 273 coding  | coding    | noncoding | noncoding |
| MSTRG.46555.1  |              | XLOC_044811 | 302 coding  | noncoding | noncoding | noncoding |

|                 |              |             |             |           |           |           |
|-----------------|--------------|-------------|-------------|-----------|-----------|-----------|
| MSTRG. 46728. 1 | ROBO1        | XLOC_044854 | 274 coding  | noncoding | noncoding | noncoding |
| MSTRG. 46731. 1 | ROBO1        | XLOC_044855 | 221 coding  | noncoding | noncoding | noncoding |
| MSTRG. 46732. 1 | ROBO1        | XLOC_044856 | 310 coding  | noncoding | noncoding | noncoding |
| MSTRG. 46660. 1 |              | XLOC_044865 | 239 coding  | noncoding | noncoding | noncoding |
| MSTRG. 46667. 1 |              | XLOC_044868 | 271 coding  | noncoding | noncoding | noncoding |
| MSTRG. 46674. 1 |              | XLOC_044873 | 219 coding  | noncoding | noncoding | noncoding |
| MSTRG. 46750. 1 | LOC105377177 | XLOC_044875 | 258 coding  | noncoding | noncoding | noncoding |
| MSTRG. 46772. 1 | LINC02027    | XLOC_044888 | 321 coding  | noncoding | noncoding | noncoding |
| MSTRG. 46789. 1 |              | XLOC_044895 | 308 coding  | noncoding | noncoding | noncoding |
| MSTRG. 46814. 1 | LINC02008    | XLOC_044910 | 233 coding  | noncoding | noncoding | noncoding |
| MSTRG. 46800. 1 |              | XLOC_044914 | 212 coding  | noncoding | noncoding | noncoding |
| MSTRG. 46830. 1 |              | XLOC_044923 | 213 coding  | noncoding | noncoding | noncoding |
| MSTRG. 46834. 1 | LOC101927439 | XLOC_044926 | 341 coding  | coding    | noncoding | noncoding |
| MSTRG. 46849. 1 |              | XLOC_044937 | 263 coding  | noncoding | noncoding | noncoding |
| MSTRG. 46911. 1 | CADM2        | XLOC_044955 | 247 coding  | noncoding | noncoding | noncoding |
| MSTRG. 46918. 1 | CADM2        | XLOC_044959 | 288 coding  | noncoding | noncoding | noncoding |
| MSTRG. 46872. 1 |              | XLOC_044966 | 252 coding  | noncoding | noncoding | noncoding |
| MSTRG. 46874. 1 |              | XLOC_044967 | 295 coding  | noncoding | noncoding | noncoding |
| MSTRG. 46882. 1 | LOC102723364 | XLOC_044969 | 227 coding  | noncoding | noncoding | noncoding |
| MSTRG. 46883. 1 | LOC102723364 | XLOC_044970 | 293 coding  | noncoding | noncoding | noncoding |
| MSTRG. 46962. 1 | LINC00506    | XLOC_044985 | 284 coding  | noncoding | noncoding | noncoding |
| MSTRG. 46990. 1 | LOC105377198 | XLOC_044999 | 310 coding  | noncoding | noncoding | noncoding |
| XM_005264751. 3 | HTR1F        | XLOC_045001 | 4412 coding | coding    | coding    | coding    |
| MSTRG. 47005. 1 | HTR1F        | XLOC_045003 | 233 coding  | noncoding | noncoding | noncoding |
| XM_011534340. 3 | ZNF654       | XLOC_045006 | 3926 coding | noncoding | noncoding | coding    |
| NM_001350136. 2 | ZNF654       | XLOC_045006 | 6324 coding | coding    | coding    | coding    |
| XM_005264745. 5 | C3orf38      | XLOC_045027 | 2356 coding | coding    | coding    | coding    |
| MSTRG. 47240. 1 |              | XLOC_045029 | 210 coding  | noncoding | noncoding | noncoding |
| MSTRG. 47262. 1 |              | XLOC_045040 | 207 coding  | noncoding | noncoding | noncoding |
| MSTRG. 47269. 1 |              | XLOC_045044 | 257 coding  | noncoding | noncoding | noncoding |
| MSTRG. 47273. 1 |              | XLOC_045047 | 303 coding  | noncoding | noncoding | noncoding |
| MSTRG. 47283. 1 |              | XLOC_045051 | 220 coding  | noncoding | noncoding | noncoding |
| MSTRG. 47310. 1 | EPHA3        | XLOC_045061 | 263 coding  | noncoding | noncoding | noncoding |
| MSTRG. 47294. 1 |              | XLOC_045067 | 355 coding  | noncoding | noncoding | noncoding |
| MSTRG. 47318. 1 |              | XLOC_045069 | 271 coding  | noncoding | noncoding | noncoding |
| MSTRG. 47327. 1 |              | XLOC_045073 | 273 coding  | noncoding | noncoding | noncoding |
| MSTRG. 47328. 1 |              | XLOC_045074 | 254 coding  | noncoding | noncoding | noncoding |
| MSTRG. 47362. 1 |              | XLOC_045076 | 231 coding  | noncoding | noncoding | noncoding |
| MSTRG. 47376. 1 |              | XLOC_045086 | 253 coding  | noncoding | noncoding | noncoding |
| MSTRG. 47383. 1 |              | XLOC_045090 | 250 coding  | noncoding | noncoding | noncoding |
| XM_011512532. 2 | ARL13B       | XLOC_045093 | 3618 coding | coding    | coding    | coding    |
| MSTRG. 47411. 1 |              | XLOC_045122 | 210 coding  | coding    | noncoding | noncoding |
| MSTRG. 47436. 1 |              | XLOC_045132 | 381 coding  | noncoding | noncoding | noncoding |

|                |              |             |             |           |           |           |
|----------------|--------------|-------------|-------------|-----------|-----------|-----------|
| MSTRG.47479.1  |              | XLOC_045142 | 276 coding  | noncoding | noncoding | noncoding |
| MSTRG.47546.1  | GABRR3       | XLOC_045180 | 302 coding  | coding    | noncoding | noncoding |
| MSTRG.47558.1  |              | XLOC_045190 | 283 coding  | coding    | noncoding | noncoding |
| MSTRG.47608.1  |              | XLOC_045214 | 224 coding  | noncoding | noncoding | noncoding |
| NM_006100.3    | ST3GAL6      | XLOC_045219 | 3571 coding | coding    | coding    | coding    |
| MSTRG.47629.1  |              | XLOC_045251 | 251 coding  | noncoding | coding    | noncoding |
| MSTRG.47630.1  |              | XLOC_045252 | 374 coding  | noncoding | noncoding | noncoding |
| MSTRG.47633.1  |              | XLOC_045254 | 291 coding  | noncoding | noncoding | noncoding |
| MSTRG.47716.1  | LOC105374007 | XLOC_045262 | 314 coding  | noncoding | noncoding | noncoding |
| MSTRG.47872.1  | FILIP1L      | XLOC_045286 | 261 coding  | noncoding | noncoding | noncoding |
| MSTRG.47773.1  |              | XLOC_045299 | 314 coding  | coding    | noncoding | noncoding |
| MSTRG.47819.1  | LNP1         | XLOC_045313 | 249 coding  | noncoding | noncoding | noncoding |
| MSTRG.47846.1  | ABI3BP       | XLOC_045332 | 569 coding  | noncoding | noncoding | noncoding |
| MSTRG.47822.1  |              | XLOC_045336 | 279 coding  | noncoding | noncoding | noncoding |
| MSTRG.47825.1  |              | XLOC_045338 | 277 coding  | noncoding | noncoding | noncoding |
| MSTRG.47831.1  |              | XLOC_045341 | 318 coding  | noncoding | noncoding | noncoding |
| MSTRG.47896.1  |              | XLOC_045381 | 271 coding  | noncoding | noncoding | noncoding |
| MSTRG.47950.1  | NXPE3        | XLOC_045389 | 211 coding  | noncoding | noncoding | noncoding |
| MSTRG.47916.1  |              | XLOC_045396 | 290 coding  | noncoding | noncoding | noncoding |
| MSTRG.47917.1  |              | XLOC_045397 | 225 coding  | noncoding | noncoding | noncoding |
| MSTRG.47976.1  |              | XLOC_045414 | 298 coding  | coding    | noncoding | noncoding |
| MSTRG.47987.1  |              | XLOC_045427 | 269 coding  | noncoding | noncoding | noncoding |
| MSTRG.47989.1  |              | XLOC_045428 | 302 coding  | noncoding | coding    | noncoding |
| MSTRG.48168.1  |              | XLOC_045503 | 289 coding  | noncoding | noncoding | noncoding |
| MSTRG.48215.1  | LOC101929485 | XLOC_045511 | 247 coding  | noncoding | noncoding | noncoding |
| MSTRG.48222.1  |              | XLOC_045516 | 252 coding  | noncoding | noncoding | noncoding |
| MSTRG.48226.1  |              | XLOC_045520 | 235 coding  | noncoding | noncoding | noncoding |
| MSTRG.48236.1  | LINC00882    | XLOC_045524 | 291 coding  | noncoding | noncoding | noncoding |
| XM_024453651.1 | BBX          | XLOC_045541 | 3983 coding | coding    | coding    | coding    |
| MSTRG.48262.1  | LINC00635    | XLOC_045597 | 551 coding  | noncoding | noncoding | noncoding |
| MSTRG.48581.4  | CD47         | XLOC_045606 | 8888 coding | coding    | coding    | noncoding |
| MSTRG.48332.1  |              | XLOC_045616 | 236 coding  | noncoding | noncoding | noncoding |
| MSTRG.48340.1  |              | XLOC_045640 | 217 coding  | noncoding | noncoding | noncoding |
| MSTRG.48379.1  | LINC01205    | XLOC_045664 | 301 coding  | noncoding | noncoding | noncoding |
| MSTRG.48420.1  |              | XLOC_045665 | 294 coding  | noncoding | noncoding | noncoding |
| MSTRG.48426.1  |              | XLOC_045668 | 844 coding  | noncoding | noncoding | noncoding |
| MSTRG.48419.1  |              | XLOC_045673 | 236 coding  | noncoding | coding    | noncoding |
| MSTRG.48462.1  |              | XLOC_045685 | 370 coding  | noncoding | noncoding | noncoding |
| MSTRG.48466.1  |              | XLOC_045687 | 255 coding  | noncoding | noncoding | noncoding |
| XM_017005521.1 | CD96         | XLOC_045706 | 4140 coding | coding    | coding    | coding    |
| MSTRG.48716.1  | PLCXD2       | XLOC_045733 | 244 coding  | noncoding | noncoding | noncoding |
| MSTRG.48745.1  | LOC105374040 | XLOC_045742 | 277 coding  | noncoding | noncoding | noncoding |
| MSTRG.48750.1  | PHLDB2       | XLOC_045745 | 262 coding  | noncoding | noncoding | noncoding |

|                 |              |             |             |           |           |           |
|-----------------|--------------|-------------|-------------|-----------|-----------|-----------|
| MSTRG. 48660. 1 | CCDC80       | XLOC_045769 | 275 coding  | coding    | noncoding | noncoding |
| MSTRG. 48671. 1 |              | XLOC_045780 | 457 coding  | noncoding | noncoding | noncoding |
| NM_014170. 3    | GTPBP8       | XLOC_045792 | 1913 coding | coding    | coding    | coding    |
| NM_001301867. 2 | BOC          | XLOC_045799 | 2181 coding | coding    | coding    | coding    |
| MSTRG. 48897. 2 | ATP6V1A      | XLOC_045852 | 3187 coding | coding    | coding    | coding    |
| MSTRG. 48848. 1 |              | XLOC_045857 | 354 coding  | noncoding | noncoding | noncoding |
| MSTRG. 48933. 1 | GRAMD1C      | XLOC_045859 | 492 coding  | noncoding | noncoding | noncoding |
| MSTRG. 48938. 1 | GRAMD1C      | XLOC_045863 | 620 coding  | noncoding | noncoding | noncoding |
| MSTRG. 48939. 1 | GRAMD1C      | XLOC_045864 | 265 coding  | noncoding | noncoding | noncoding |
| MSTRG. 48950. 1 | DRD3         | XLOC_045886 | 294 coding  | noncoding | noncoding | noncoding |
| MSTRG. 49000. 1 | LOC101926886 | XLOC_045899 | 233 coding  | noncoding | noncoding | noncoding |
| MSTRG. 49040. 1 |              | XLOC_045930 | 253 coding  | noncoding | noncoding | noncoding |
| MSTRG. 49049. 1 |              | XLOC_045936 | 294 coding  | noncoding | noncoding | noncoding |
| MSTRG. 49115. 1 |              | XLOC_045968 | 441 coding  | coding    | noncoding | noncoding |
| MSTRG. 49177. 1 | LOC107983969 | XLOC_045991 | 566 coding  | noncoding | noncoding | noncoding |
| MSTRG. 49189. 1 |              | XLOC_046013 | 239 coding  | noncoding | noncoding | noncoding |
| MSTRG. 49255. 1 | B4GALT4-AS1  | XLOC_046022 | 292 coding  | noncoding | noncoding | noncoding |
| XM_006713714. 3 | ARHGAP31     | XLOC_046024 | 6349 coding | coding    | coding    | coding    |
| MSTRG. 49266. 1 | ARHGAP31     | XLOC_046029 | 371 coding  | noncoding | noncoding | noncoding |
| MSTRG. 49268. 1 | ARHGAP31     | XLOC_046031 | 293 coding  | noncoding | noncoding | noncoding |
| XR_001740212. 2 | POGLUT1      | XLOC_046038 | 3654 coding | coding    | coding    | coding    |
| MSTRG. 49245. 1 | MAATS1       | XLOC_046055 | 247 coding  | noncoding | noncoding | noncoding |
| MSTRG. 49299. 1 | GPR156       | XLOC_046068 | 222 coding  | noncoding | noncoding | noncoding |
| XM_017007535. 2 | STXBP5L      | XLOC_046103 | 6823 coding | coding    | noncoding | coding    |
| MSTRG. 49433. 1 | STXBP5L      | XLOC_046106 | 202 coding  | noncoding | noncoding | noncoding |
| MSTRG. 49512. 1 | CCDC58       | XLOC_046164 | 250 coding  | noncoding | noncoding | noncoding |
| XR_924405. 3    | LOC105374071 | XLOC_046176 | 5347 coding | noncoding | noncoding | noncoding |
| MSTRG. 49636. 1 | SLC49A4      | XLOC_046196 | 239 coding  | noncoding | noncoding | noncoding |
| MSTRG. 49601. 1 | PDIA5        | XLOC_046209 | 229 coding  | noncoding | noncoding | noncoding |
| MSTRG. 49700. 1 | MYLK-AS1     | XLOC_046233 | 255 coding  | noncoding | noncoding | noncoding |
| MSTRG. 49715. 1 | MYLK         | XLOC_046238 | 289 coding  | noncoding | noncoding | noncoding |
| MSTRG. 49676. 4 | CCDC14       | XLOC_046244 | 3940 coding | coding    | noncoding | noncoding |
| MSTRG. 49720. 1 |              | XLOC_046263 | 230 coding  | noncoding | noncoding | noncoding |
| MSTRG. 49763. 1 | MUC13        | XLOC_046268 | 291 coding  | noncoding | noncoding | noncoding |
| MSTRG. 49860. 4 | OSBPL11      | XLOC_046294 | 528 coding  | coding    | noncoding | noncoding |
| MSTRG. 49851. 1 |              | XLOC_046296 | 248 coding  | noncoding | noncoding | noncoding |
| MSTRG. 49854. 1 |              | XLOC_046298 | 220 coding  | noncoding | noncoding | noncoding |
| MSTRG. 49935. 1 | LOC107986044 | XLOC_046339 | 202 coding  | noncoding | noncoding | noncoding |
| MSTRG. 50301. 1 | LOC107986129 | XLOC_046405 | 246 coding  | noncoding | noncoding | noncoding |
| MSTRG. 50322. 1 |              | XLOC_046414 | 287 coding  | noncoding | noncoding | noncoding |
| MSTRG. 50384. 1 | RUVBL1       | XLOC_046416 | 1403 coding | coding    | coding    | coding    |
| MSTRG. 50384. 2 | RUVBL1       | XLOC_046416 | 1320 coding | coding    | coding    | coding    |
| NR_125398. 1    | GATA2-AS1    | XLOC_046435 | 2358 coding | noncoding | coding    | noncoding |

|                  |              |             |              |           |           |           |
|------------------|--------------|-------------|--------------|-----------|-----------|-----------|
| MSTRG. 50338. 1  |              | XLOC_046445 | 229 coding   | noncoding | noncoding | noncoding |
| MSTRG. 50364. 1  | RAB7A        | XLOC_046449 | 294 coding   | noncoding | noncoding | noncoding |
| MSTRG. 50485. 1  | ACAD9        | XLOC_046467 | 296 coding   | noncoding | noncoding | noncoding |
| XR_001740270. 2  | EFCC1        | XLOC_046473 | 1319 coding  | coding    | coding    | coding    |
| XM_005247781. 4  | EFCC1        | XLOC_046473 | 2778 coding  | coding    | coding    | coding    |
| MSTRG. 50467. 2  | ISY1-RAB43   | XLOC_046484 | 1936 coding  | coding    | noncoding | noncoding |
| MSTRG. 50473. 1  | CNBP         | XLOC_046487 | 1651 coding  | coding    | coding    | coding    |
| MSTRG. 50516. 1  | COPG1        | XLOC_046493 | 279 coding   | noncoding | noncoding | noncoding |
| NM_007117. 5     | TRH          | XLOC_046527 | 1560 coding  | coding    | coding    | coding    |
| NR_027898. 1     | COL6A4P2     | XLOC_046539 | 9161 coding  | coding    | coding    | coding    |
| NR_022012. 2     | COL6A5       | XLOC_046541 | 9228 coding  | coding    | noncoding | coding    |
| NM_001199182. 2  | ATP2C1       | XLOC_046562 | 3526 coding  | coding    | coding    | coding    |
| NM_014382. 4     | ATP2C1       | XLOC_046562 | 4832 coding  | coding    | coding    | coding    |
| MSTRG. 50826. 1  | NEK11        | XLOC_046568 | 290 coding   | noncoding | noncoding | noncoding |
| MSTRG. 50672. 1  |              | XLOC_046595 | 258 coding   | noncoding | noncoding | noncoding |
| MSTRG. 50719. 1  | CPNE4        | XLOC_046605 | 247 coding   | noncoding | noncoding | noncoding |
| MSTRG. 50749. 1  | CPNE4        | XLOC_046625 | 243 coding   | noncoding | noncoding | noncoding |
| MSTRG. 50682. 1  | ACPP         | XLOC_046638 | 283 coding   | noncoding | noncoding | noncoding |
| MSTRG. 50878. 1  | TMEM108      | XLOC_046683 | 288 coding   | noncoding | noncoding | noncoding |
| MSTRG. 50866. 1  |              | XLOC_046704 | 558 coding   | noncoding | noncoding | noncoding |
| MSTRG. 50867. 1  |              | XLOC_046705 | 215 coding   | noncoding | noncoding | noncoding |
| NM_001354703. 2  | TF           | XLOC_046715 | 21134 coding | coding    | coding    | coding    |
| MSTRG. 50992. 3  | RYK          | XLOC_046737 | 3485 coding  | coding    | coding    | noncoding |
| NR_148353. 1     | CEP63        | XLOC_046746 | 5546 coding  | coding    | coding    | coding    |
| MSTRG. 51660. 61 | CEP63        | XLOC_046746 | 3107 coding  | coding    | noncoding | noncoding |
| MSTRG. 51660. 62 | CEP63        | XLOC_046746 | 587 coding   | noncoding | noncoding | noncoding |
| MSTRG. 51016. 1  |              | XLOC_046823 | 471 coding   | noncoding | noncoding | noncoding |
| MSTRG. 51027. 1  |              | XLOC_046830 | 446 coding   | noncoding | noncoding | noncoding |
| XM_017006787. 2  | PPP2R3A      | XLOC_046831 | 8252 coding  | coding    | coding    | coding    |
| MSTRG. 51029. 1  |              | XLOC_046833 | 251 coding   | noncoding | noncoding | noncoding |
| MSTRG. 51111. 1  |              | XLOC_046835 | 270 coding   | noncoding | noncoding | noncoding |
| MSTRG. 51048. 1  |              | XLOC_046844 | 300 coding   | noncoding | noncoding | noncoding |
| MSTRG. 51053. 1  |              | XLOC_046847 | 264 coding   | noncoding | noncoding | noncoding |
| NM_025246. 3     | SLC35G2      | XLOC_046848 | 1949 coding  | coding    | coding    | coding    |
| MSTRG. 51178. 1  | IL20RB       | XLOC_046866 | 358 coding   | noncoding | noncoding | noncoding |
| MSTRG. 51086. 1  |              | XLOC_046880 | 311 coding   | noncoding | noncoding | noncoding |
| MSTRG. 51097. 1  | LOC105374126 | XLOC_046885 | 285 coding   | noncoding | noncoding | noncoding |
| MSTRG. 51228. 1  | NME9         | XLOC_046916 | 226 coding   | noncoding | noncoding | noncoding |
| MSTRG. 51275. 7  | PIK3CB       | XLOC_046939 | 595 coding   | coding    | noncoding | noncoding |
| MSTRG. 51260. 1  |              | XLOC_046946 | 259 coding   | coding    | noncoding | noncoding |
| MSTRG. 51264. 1  |              | XLOC_046947 | 279 coding   | noncoding | noncoding | noncoding |
| MSTRG. 51399. 1  | LOC100507291 | XLOC_046954 | 253 coding   | noncoding | noncoding | noncoding |
| MSTRG. 51317. 1  | CLSTN2       | XLOC_046971 | 245 coding   | noncoding | noncoding | noncoding |

|                 |              |             |              |           |           |           |
|-----------------|--------------|-------------|--------------|-----------|-----------|-----------|
| MSTRG. 51299. 1 | LOC102724068 | XLOC_046984 | 252 coding   | noncoding | noncoding | noncoding |
| MSTRG. 51308. 1 |              | XLOC_046990 | 279 coding   | noncoding | noncoding | noncoding |
| NM_080862. 3    | SPSB4        | XLOC_047002 | 2963 coding  | coding    | coding    | coding    |
| XM_017007509. 2 | SPSB4        | XLOC_047002 | 14504 coding | coding    | coding    | coding    |
| MSTRG. 51350. 1 | SPSB4        | XLOC_047003 | 282 coding   | noncoding | noncoding | noncoding |
| MSTRG. 51462. 1 | GRK7         | XLOC_047066 | 325 coding   | noncoding | noncoding | noncoding |
| MSTRG. 51474. 1 | ATP1B3       | XLOC_047075 | 237 coding   | noncoding | noncoding | noncoding |
| MSTRG. 51555. 1 | LOC105374136 | XLOC_047100 | 206 coding   | noncoding | noncoding | noncoding |
| MSTRG. 51565. 1 | PLS1         | XLOC_047101 | 430 coding   | noncoding | noncoding | noncoding |
| MSTRG. 51572. 1 | PCOLCE2      | XLOC_047106 | 257 coding   | noncoding | noncoding | noncoding |
| MSTRG. 51573. 1 | PCOLCE2      | XLOC_047107 | 257 coding   | noncoding | noncoding | noncoding |
| MSTRG. 52401. 1 |              | XLOC_047131 | 268 coding   | noncoding | noncoding | noncoding |
| MSTRG. 51648. 1 |              | XLOC_047141 | 225 coding   | noncoding | noncoding | noncoding |
| MSTRG. 51827. 1 |              | XLOC_047148 | 275 coding   | noncoding | noncoding | noncoding |
| MSTRG. 51871. 1 | LOC105374140 | XLOC_047160 | 245 coding   | noncoding | noncoding | noncoding |
| MSTRG. 51742. 1 |              | XLOC_047167 | 276 coding   | noncoding | noncoding | noncoding |
| MSTRG. 51746. 1 |              | XLOC_047170 | 359 coding   | noncoding | noncoding | noncoding |
| MSTRG. 51771. 1 |              | XLOC_047184 | 203 coding   | noncoding | noncoding | noncoding |
| MSTRG. 51779. 1 |              | XLOC_047188 | 297 coding   | noncoding | noncoding | noncoding |
| MSTRG. 51801. 1 |              | XLOC_047203 | 238 coding   | noncoding | noncoding | noncoding |
| MSTRG. 51884. 1 |              | XLOC_047207 | 270 coding   | noncoding | noncoding | noncoding |
| MSTRG. 51899. 1 | PLSCR4       | XLOC_047211 | 298 coding   | noncoding | noncoding | noncoding |
| MSTRG. 51891. 1 |              | XLOC_047212 | 260 coding   | noncoding | noncoding | noncoding |
| MSTRG. 51904. 1 |              | XLOC_047221 | 281 coding   | noncoding | noncoding | noncoding |
| MSTRG. 51913. 1 |              | XLOC_047228 | 263 coding   | noncoding | noncoding | noncoding |
| NM_003412. 4    | ZIC1         | XLOC_047234 | 5260 coding  | coding    | coding    | coding    |
| MSTRG. 51937. 1 |              | XLOC_047241 | 217 coding   | noncoding | noncoding | noncoding |
| MSTRG. 52059. 1 | CP           | XLOC_047275 | 340 coding   | coding    | noncoding | noncoding |
| MSTRG. 52060. 1 | CP           | XLOC_047276 | 237 coding   | noncoding | noncoding | noncoding |
| MSTRG. 52026. 1 |              | XLOC_047279 | 251 coding   | noncoding | noncoding | noncoding |
| MSTRG. 52028. 1 |              | XLOC_047280 | 294 coding   | noncoding | noncoding | noncoding |
| MSTRG. 52045. 1 | WWTR1        | XLOC_047289 | 286 coding   | noncoding | noncoding | noncoding |
| MSTRG. 52068. 1 |              | XLOC_047307 | 356 coding   | noncoding | noncoding | noncoding |
| NM_183383. 2    | RNF13        | XLOC_047308 | 2743 coding  | coding    | coding    | coding    |
| XM_017005658. 1 | RNF13        | XLOC_047308 | 2950 coding  | coding    | coding    | coding    |
| MSTRG. 52090. 1 |              | XLOC_047347 | 238 coding   | noncoding | noncoding | noncoding |
| XM_011513337. 3 | TSC22D2      | XLOC_047369 | 2792 coding  | noncoding | coding    | coding    |
| MSTRG. 52187. 1 |              | XLOC_047404 | 285 coding   | noncoding | noncoding | noncoding |
| MSTRG. 52250. 1 | CLRN1        | XLOC_047415 | 217 coding   | noncoding | noncoding | noncoding |
| MSTRG. 52286. 1 | GPR87        | XLOC_047430 | 412 coding   | coding    | noncoding | noncoding |
| MSTRG. 52312. 1 | IGSF10       | XLOC_047443 | 254 coding   | noncoding | noncoding | noncoding |
| MSTRG. 52314. 1 | IGSF10       | XLOC_047444 | 279 coding   | coding    | noncoding | noncoding |
| NM_207365. 4    | AADACL2      | XLOC_047456 | 5060 coding  | coding    | coding    | coding    |

|                |              |             |              |           |           |           |
|----------------|--------------|-------------|--------------|-----------|-----------|-----------|
| XM_017006433.2 | MBNL1        | XLOC_047501 | 4869 coding  | noncoding | coding    | coding    |
| XM_017006426.1 | MBNL1        | XLOC_047501 | 5641 coding  | noncoding | coding    | coding    |
| XR_924590.2    | LOC102724289 | XLOC_047525 | 3843 coding  | coding    | coding    | noncoding |
| MSTRG.52351.1  |              | XLOC_047527 | 288 coding   | noncoding | noncoding | noncoding |
| MSTRG.52361.1  |              | XLOC_047533 | 290 coding   | noncoding | noncoding | noncoding |
| MSTRG.52516.1  | ARHGEF26-AS1 | XLOC_047560 | 257 coding   | noncoding | noncoding | noncoding |
| MSTRG.52491.1  | GPR149       | XLOC_047574 | 247 coding   | noncoding | noncoding | noncoding |
| MSTRG.52487.1  |              | XLOC_047577 | 316 coding   | coding    | noncoding | noncoding |
| MSTRG.52502.1  |              | XLOC_047581 | 503 coding   | noncoding | noncoding | noncoding |
| MSTRG.52503.1  |              | XLOC_047582 | 253 coding   | coding    | noncoding | noncoding |
| MSTRG.52549.1  |              | XLOC_047590 | 244 coding   | noncoding | noncoding | noncoding |
| MSTRG.52600.1  |              | XLOC_047635 | 231 coding   | noncoding | noncoding | noncoding |
| MSTRG.52610.1  |              | XLOC_047647 | 310 coding   | noncoding | noncoding | noncoding |
| MSTRG.52617.1  |              | XLOC_047652 | 271 coding   | noncoding | noncoding | noncoding |
| MSTRG.52640.1  | PLCH1        | XLOC_047654 | 452 coding   | noncoding | coding    | noncoding |
| MSTRG.52629.1  |              | XLOC_047666 | 294 coding   | noncoding | noncoding | noncoding |
| MSTRG.52671.1  | GMPS         | XLOC_047677 | 771 coding   | noncoding | noncoding | noncoding |
| MSTRG.52665.1  |              | XLOC_047680 | 276 coding   | noncoding | noncoding | noncoding |
| MSTRG.52667.1  |              | XLOC_047681 | 302 coding   | noncoding | noncoding | noncoding |
| MSTRG.52792.1  | TIPARP       | XLOC_047692 | 254 coding   | noncoding | noncoding | noncoding |
| NM_016625.3    | RSRC1        | XLOC_047748 | 1727 coding  | noncoding | coding    | coding    |
| XM_006713730.2 | MFS1         | XLOC_047799 | 1443 coding  | coding    | coding    | coding    |
| MSTRG.53093.1  | IQCJ-SCHIP1  | XLOC_047825 | 296 coding   | noncoding | noncoding | noncoding |
| MSTRG.53099.1  | IQCJ-SCHIP1  | XLOC_047826 | 247 coding   | noncoding | noncoding | noncoding |
| MSTRG.53050.1  | IL12A-AS1    | XLOC_047832 | 309 coding   | noncoding | noncoding | noncoding |
| MSTRG.53051.1  | IL12A-AS1    | XLOC_047833 | 233 coding   | noncoding | noncoding | noncoding |
| MSTRG.53171.1  | TRIM59-IFT80 | XLOC_047850 | 264 coding   | coding    | noncoding | noncoding |
| MSTRG.53173.1  | TRIM59-IFT80 | XLOC_047852 | 386 coding   | noncoding | noncoding | noncoding |
| MSTRG.53142.1  |              | XLOC_047857 | 256 coding   | noncoding | noncoding | noncoding |
| NR_134243.1    | PPM1L        | XLOC_047870 | 10853 coding | coding    | coding    | noncoding |
| MSTRG.53444.1  | PPM1L        | XLOC_047894 | 298 coding   | noncoding | noncoding | noncoding |
| MSTRG.53217.1  |              | XLOC_047926 | 844 coding   | noncoding | noncoding | noncoding |
| MSTRG.53219.1  |              | XLOC_047928 | 324 coding   | coding    | noncoding | noncoding |
| MSTRG.53236.1  |              | XLOC_047936 | 305 coding   | noncoding | noncoding | noncoding |
| MSTRG.53257.1  |              | XLOC_047948 | 265 coding   | noncoding | noncoding | noncoding |
| MSTRG.53270.1  |              | XLOC_047952 | 201 coding   | noncoding | noncoding | noncoding |
| MSTRG.53278.1  |              | XLOC_047956 | 314 coding   | noncoding | noncoding | noncoding |
| MSTRG.53283.1  |              | XLOC_047960 | 236 coding   | noncoding | noncoding | noncoding |
| MSTRG.53299.1  |              | XLOC_047966 | 264 coding   | noncoding | noncoding | noncoding |
| MSTRG.53303.1  |              | XLOC_047976 | 319 coding   | noncoding | noncoding | noncoding |
| MSTRG.53337.1  |              | XLOC_047989 | 273 coding   | noncoding | noncoding | noncoding |
| MSTRG.53339.1  |              | XLOC_047990 | 261 coding   | noncoding | noncoding | noncoding |
| MSTRG.53351.1  |              | XLOC_047991 | 272 coding   | noncoding | noncoding | noncoding |

|                 |              |             |              |           |           |           |
|-----------------|--------------|-------------|--------------|-----------|-----------|-----------|
| MSTRG. 53379. 1 |              | XLOC_048005 | 316 coding   | noncoding | noncoding | noncoding |
| MSTRG. 53384. 1 |              | XLOC_048008 | 303 coding   | noncoding | noncoding | noncoding |
| MSTRG. 53387. 1 |              | XLOC_048010 | 256 coding   | noncoding | noncoding | noncoding |
| MSTRG. 53397. 1 | LOC105374193 | XLOC_048012 | 279 coding   | noncoding | noncoding | noncoding |
| MSTRG. 53409. 1 | ZBBX         | XLOC_048019 | 250 coding   | noncoding | noncoding | noncoding |
| MSTRG. 53404. 1 |              | XLOC_048024 | 256 coding   | coding    | noncoding | noncoding |
| MSTRG. 53405. 1 |              | XLOC_048025 | 281 coding   | noncoding | noncoding | noncoding |
| MSTRG. 53467. 1 | WDR49        | XLOC_048034 | 317 coding   | noncoding | noncoding | noncoding |
| MSTRG. 53505. 1 |              | XLOC_048079 | 292 coding   | noncoding | noncoding | noncoding |
| MSTRG. 53614. 1 | MECOM        | XLOC_048100 | 257 coding   | noncoding | noncoding | noncoding |
| MSTRG. 53617. 1 | MECOM        | XLOC_048102 | 302 coding   | noncoding | noncoding | noncoding |
| MSTRG. 53622. 1 | MECOM        | XLOC_048105 | 301 coding   | noncoding | noncoding | noncoding |
| MSTRG. 53599. 1 |              | XLOC_048117 | 450 coding   | coding    | noncoding | noncoding |
| MSTRG. 53600. 1 |              | XLOC_048118 | 287 coding   | noncoding | noncoding | noncoding |
| MSTRG. 53601. 1 |              | XLOC_048119 | 275 coding   | noncoding | noncoding | noncoding |
| MSTRG. 53603. 1 |              | XLOC_048120 | 282 coding   | noncoding | noncoding | noncoding |
| MSTRG. 53608. 1 | ACTRT3       | XLOC_048122 | 257 coding   | coding    | noncoding | noncoding |
| MSTRG. 53641. 1 |              | XLOC_048131 | 362 coding   | noncoding | noncoding | noncoding |
| MSTRG. 53643. 1 |              | XLOC_048138 | 306 coding   | noncoding | noncoding | noncoding |
| MSTRG. 53661. 1 |              | XLOC_048147 | 240 coding   | noncoding | noncoding | noncoding |
| MSTRG. 53666. 1 | PRKCI        | XLOC_048149 | 450 coding   | noncoding | noncoding | noncoding |
| MSTRG. 53663. 1 |              | XLOC_048150 | 260 coding   | noncoding | noncoding | noncoding |
| NM_005602. 6    | CLDN11       | XLOC_048153 | 2758 coding  | coding    | coding    | coding    |
| MSTRG. 53668. 1 |              | XLOC_048155 | 294 coding   | noncoding | noncoding | noncoding |
| MSTRG. 53669. 1 |              | XLOC_048156 | 277 coding   | noncoding | noncoding | noncoding |
| MSTRG. 53691. 1 | SLC7A14-AS1  | XLOC_048163 | 290 coding   | noncoding | noncoding | noncoding |
| MSTRG. 53693. 1 | SLC7A14-AS1  | XLOC_048164 | 211 coding   | noncoding | noncoding | noncoding |
| MSTRG. 53673. 1 |              | XLOC_048168 | 296 coding   | noncoding | noncoding | noncoding |
| MSTRG. 53709. 1 | SLC2A2       | XLOC_048178 | 317 coding   | noncoding | noncoding | noncoding |
| MSTRG. 53873. 1 | SPATA16      | XLOC_048254 | 273 coding   | noncoding | noncoding | noncoding |
| MSTRG. 53877. 1 | SPATA16      | XLOC_048255 | 254 coding   | noncoding | noncoding | noncoding |
| MSTRG. 53863. 1 | LOC105374224 | XLOC_048259 | 306 coding   | noncoding | noncoding | noncoding |
| XM_017005895. 2 | NLGN1        | XLOC_048262 | 19459 coding | coding    | coding    | coding    |
| MSTRG. 53896. 1 | NLGN1        | XLOC_048263 | 363 coding   | noncoding | noncoding | noncoding |
| MSTRG. 53912. 1 | NLGN1        | XLOC_048268 | 402 coding   | noncoding | noncoding | noncoding |
| MSTRG. 54007. 1 | NAALADL2     | XLOC_048283 | 304 coding   | noncoding | noncoding | noncoding |
| MSTRG. 53977. 1 |              | XLOC_048326 | 225 coding   | noncoding | noncoding | noncoding |
| MSTRG. 53983. 1 |              | XLOC_048329 | 280 coding   | coding    | noncoding | noncoding |
| MSTRG. 54122. 7 | TBL1XR1      | XLOC_048337 | 3229 coding  | coding    | coding    | noncoding |
| MSTRG. 54073. 1 | LINC00501    | XLOC_048344 | 288 coding   | noncoding | noncoding | noncoding |
| MSTRG. 54114. 1 | LINC00578    | XLOC_048358 | 265 coding   | noncoding | noncoding | noncoding |
| MSTRG. 54095. 1 | LINC02015    | XLOC_048362 | 284 coding   | noncoding | noncoding | noncoding |
| MSTRG. 54187. 1 | KCNMB2-AS1   | XLOC_048378 | 262 coding   | coding    | noncoding | noncoding |

|                 |              |             |             |           |           |           |
|-----------------|--------------|-------------|-------------|-----------|-----------|-----------|
| MSTRG. 54188. 1 | KCNMB2-AS1   | XLOC_048379 | 264 coding  | noncoding | noncoding | noncoding |
| MSTRG. 54195. 1 | KCNMB2-AS1   | XLOC_048385 | 242 coding  | noncoding | noncoding | noncoding |
| MSTRG. 54210. 1 |              | XLOC_048398 | 685 coding  | noncoding | noncoding | noncoding |
| MSTRG. 54252. 1 | LOC101928739 | XLOC_048418 | 210 coding  | noncoding | noncoding | noncoding |
| MSTRG. 54239. 1 |              | XLOC_048448 | 392 coding  | noncoding | noncoding | noncoding |
| XM_017006550. 1 | ZNF639       | XLOC_048450 | 3176 coding | noncoding | coding    | coding    |
| MSTRG. 54246. 1 | ZNF639       | XLOC_048451 | 340 coding  | noncoding | noncoding | noncoding |
| MSTRG. 54287. 1 | LOC107986157 | XLOC_048456 | 342 coding  | noncoding | noncoding | noncoding |
| MSTRG. 54311. 1 | USP13        | XLOC_048463 | 238 coding  | noncoding | noncoding | noncoding |
| MSTRG. 54322. 1 |              | XLOC_048472 | 275 coding  | noncoding | noncoding | noncoding |
| MSTRG. 54329. 1 |              | XLOC_048475 | 328 coding  | coding    | noncoding | noncoding |
| MSTRG. 54330. 1 |              | XLOC_048476 | 287 coding  | noncoding | noncoding | noncoding |
| MSTRG. 54353. 1 | LOC101928882 | XLOC_048489 | 257 coding  | noncoding | noncoding | noncoding |
| NM_005087. 4    | FXR1         | XLOC_048495 | 8343 coding | coding    | coding    | coding    |
| MSTRG. 54473. 1 | SOX2-OT      | XLOC_048515 | 258 coding  | noncoding | noncoding | noncoding |
| MSTRG. 54385. 1 |              | XLOC_048520 | 313 coding  | noncoding | noncoding | noncoding |
| MSTRG. 54413. 1 |              | XLOC_048532 | 313 coding  | coding    | noncoding | noncoding |
| MSTRG. 54520. 1 | LOC105374245 | XLOC_048552 | 249 coding  | noncoding | noncoding | noncoding |
| XM_017006008. 1 | ATP11B       | XLOC_048554 | 6879 coding | coding    | coding    | coding    |
| MSTRG. 54535. 1 | ATP11B       | XLOC_048566 | 285 coding  | noncoding | noncoding | noncoding |
| MSTRG. 54550. 6 | DCUN1D1      | XLOC_048578 | 2675 coding | coding    | noncoding | noncoding |
| MSTRG. 54507. 1 |              | XLOC_048593 | 218 coding  | noncoding | noncoding | noncoding |
| MSTRG. 54614. 1 | YEATS2       | XLOC_048630 | 303 coding  | noncoding | noncoding | noncoding |
| MSTRG. 54615. 1 | YEATS2       | XLOC_048631 | 324 coding  | noncoding | noncoding | noncoding |
| MSTRG. 54611. 1 | MIR4448      | XLOC_048642 | 235 coding  | noncoding | coding    | noncoding |
| MSTRG. 54650. 5 | ABCC5        | XLOC_048643 | 1779 coding | noncoding | coding    | noncoding |
| MSTRG. 54634. 1 |              | XLOC_048646 | 272 coding  | noncoding | noncoding | noncoding |
| MSTRG. 54635. 1 |              | XLOC_048648 | 219 coding  | noncoding | noncoding | noncoding |
| MSTRG. 54643. 1 | LOC105374249 | XLOC_048651 | 281 coding  | noncoding | noncoding | noncoding |
| NM_001311198. 1 | AP2M1        | XLOC_048655 | 2015 coding | coding    | coding    | coding    |
| NM_032331. 3    | EEF1AKMT4    | XLOC_048660 | 990 coding  | coding    | coding    | coding    |
| MSTRG. 54676. 1 | LINC02054    | XLOC_048671 | 304 coding  | noncoding | noncoding | noncoding |
| NM_004443. 4    | EPHB3        | XLOC_048673 | 4234 coding | coding    | coding    | coding    |
| MSTRG. 54682. 1 |              | XLOC_048675 | 271 coding  | noncoding | noncoding | noncoding |
| MSTRG. 54693. 1 | LINC02069    | XLOC_048680 | 275 coding  | noncoding | noncoding | noncoding |
| MSTRG. 54695. 1 | LINC02069    | XLOC_048682 | 215 coding  | noncoding | noncoding | noncoding |
| MSTRG. 54922. 1 | VPS8         | XLOC_048731 | 254 coding  | noncoding | noncoding | noncoding |
| MSTRG. 54934. 1 |              | XLOC_048742 | 254 coding  | noncoding | noncoding | noncoding |
| MSTRG. 54714. 1 | C3orf70      | XLOC_048745 | 310 coding  | noncoding | noncoding | noncoding |
| MSTRG. 54719. 1 | EHHADH-AS1   | XLOC_048747 | 306 coding  | noncoding | noncoding | noncoding |
| XM_011513310. 2 | MAP3K13      | XLOC_048754 | 3820 coding | coding    | coding    | coding    |
| MSTRG. 54742. 1 | MAP3K13      | XLOC_048755 | 301 coding  | noncoding | noncoding | noncoding |
| MSTRG. 54748. 1 | MAP3K13      | XLOC_048757 | 541 coding  | noncoding | noncoding | noncoding |

|                  |              |             |             |           |           |           |
|------------------|--------------|-------------|-------------|-----------|-----------|-----------|
| MSTRG. 54759. 1  | LOC101929018 | XLOC_048761 | 360 coding  | noncoding | noncoding | noncoding |
| MSTRG. 54735. 1  |              | XLOC_048769 | 324 coding  | noncoding | noncoding | noncoding |
| MSTRG. 54772. 1  | SENP2        | XLOC_048771 | 230 coding  | noncoding | noncoding | noncoding |
| MSTRG. 54778. 1  |              | XLOC_048775 | 279 coding  | noncoding | noncoding | noncoding |
| MSTRG. 54799. 1  |              | XLOC_048783 | 260 coding  | noncoding | noncoding | noncoding |
| MSTRG. 54816. 1  |              | XLOC_048791 | 274 coding  | noncoding | noncoding | noncoding |
| MSTRG. 54831. 1  | LOC105374258 | XLOC_048807 | 216 coding  | coding    | noncoding | noncoding |
| MSTRG. 54834. 1  | KNG1         | XLOC_048809 | 249 coding  | noncoding | noncoding | noncoding |
| MSTRG. 54837. 1  | LOC105374259 | XLOC_048812 | 498 coding  | noncoding | noncoding | noncoding |
| NM_001177800. 2  | ADIPOQ       | XLOC_048821 | 4593 coding | coding    | coding    | coding    |
| MSTRG. 54959. 1  | ST6GAL1      | XLOC_048827 | 238 coding  | noncoding | noncoding | noncoding |
| MSTRG. 55006. 1  |              | XLOC_048867 | 306 coding  | noncoding | noncoding | noncoding |
| MSTRG. 55891. 1  | LPP          | XLOC_049000 | 272 coding  | noncoding | noncoding | noncoding |
| MSTRG. 55080. 1  |              | XLOC_049004 | 295 coding  | noncoding | noncoding | noncoding |
| MSTRG. 55223. 1  | TPRG1        | XLOC_049016 | 414 coding  | noncoding | noncoding | noncoding |
| MSTRG. 55099. 1  | LOC107986169 | XLOC_049024 | 258 coding  | coding    | noncoding | noncoding |
| MSTRG. 55122. 1  | TP63         | XLOC_049032 | 290 coding  | noncoding | noncoding | noncoding |
| MSTRG. 55124. 1  | TP63         | XLOC_049033 | 263 coding  | noncoding | noncoding | noncoding |
| MSTRG. 55145. 1  | P3H2         | XLOC_049040 | 257 coding  | noncoding | noncoding | noncoding |
| MSTRG. 55131. 1  |              | XLOC_049054 | 286 coding  | noncoding | noncoding | noncoding |
| MSTRG. 55134. 1  |              | XLOC_049056 | 317 coding  | noncoding | noncoding | noncoding |
| MSTRG. 55137. 1  |              | XLOC_049061 | 292 coding  | noncoding | noncoding | noncoding |
| MSTRG. 55171. 1  | TMEM207      | XLOC_049066 | 247 coding  | noncoding | noncoding | noncoding |
| MSTRG. 55245. 1  |              | XLOC_049094 | 266 coding  | noncoding | noncoding | noncoding |
| MSTRG. 55289. 1  |              | XLOC_049119 | 279 coding  | noncoding | noncoding | noncoding |
| MSTRG. 55295. 1  | LINCR-0002   | XLOC_049123 | 313 coding  | noncoding | noncoding | noncoding |
| MSTRG. 55296. 1  | LINCR-0002   | XLOC_049124 | 264 coding  | noncoding | noncoding | noncoding |
| MSTRG. 55317. 1  |              | XLOC_049136 | 313 coding  | noncoding | noncoding | noncoding |
| MSTRG. 55361. 1  | FGF12        | XLOC_049143 | 285 coding  | noncoding | noncoding | noncoding |
| MSTRG. 55364. 1  | FGF12        | XLOC_049145 | 228 coding  | noncoding | noncoding | noncoding |
| MSTRG. 55378. 1  | FGF12        | XLOC_049152 | 291 coding  | noncoding | noncoding | noncoding |
| MSTRG. 55388. 1  |              | XLOC_049160 | 312 coding  | noncoding | noncoding | noncoding |
| MSTRG. 55392. 1  |              | XLOC_049162 | 258 coding  | noncoding | noncoding | noncoding |
| MSTRG. 55400. 1  |              | XLOC_049166 | 296 coding  | noncoding | noncoding | noncoding |
| MSTRG. 55412. 1  | PLAAT1       | XLOC_049169 | 723 coding  | noncoding | noncoding | noncoding |
| MSTRG. 55418. 1  | ATP13A5      | XLOC_049173 | 277 coding  | noncoding | noncoding | noncoding |
| MSTRG. 55408. 1  |              | XLOC_049174 | 305 coding  | noncoding | noncoding | noncoding |
| MSTRG. 55484. 1  | ATP13A4      | XLOC_049181 | 238 coding  | noncoding | noncoding | noncoding |
| MSTRG. 55505. 17 | OPA1         | XLOC_049195 | 1594 coding | noncoding | noncoding | noncoding |
| MSTRG. 55505. 22 | OPA1         | XLOC_049195 | 1914 coding | noncoding | coding    | coding    |
| MSTRG. 55425. 1  |              | XLOC_049206 | 805 coding  | noncoding | noncoding | noncoding |
| MSTRG. 55429. 1  | LOC105374287 | XLOC_049208 | 252 coding  | noncoding | noncoding | noncoding |
| MSTRG. 55453. 1  | LINC02028    | XLOC_049214 | 291 coding  | coding    | noncoding | noncoding |

|                 |              |             |             |           |           |           |
|-----------------|--------------|-------------|-------------|-----------|-----------|-----------|
| MSTRG. 55455. 1 | LINC02028    | XLOC_049215 | 223 coding  | noncoding | noncoding | noncoding |
| MSTRG. 55441. 1 | LINC02036    | XLOC_049220 | 298 coding  | noncoding | noncoding | noncoding |
| MSTRG. 55442. 1 | LINC02036    | XLOC_049221 | 224 coding  | noncoding | noncoding | noncoding |
| MSTRG. 55473. 1 |              | XLOC_049233 | 275 coding  | noncoding | noncoding | noncoding |
| MSTRG. 55534. 1 | TMEM44       | XLOC_049237 | 283 coding  | noncoding | noncoding | noncoding |
| MSTRG. 55557. 1 | LINC01972    | XLOC_049247 | 309 coding  | noncoding | noncoding | noncoding |
| MSTRG. 55570. 1 |              | XLOC_049256 | 220 coding  | noncoding | noncoding | noncoding |
| MSTRG. 55623. 1 |              | XLOC_049286 | 276 coding  | noncoding | noncoding | noncoding |
| MSTRG. 55675. 1 |              | XLOC_049305 | 296 coding  | noncoding | noncoding | noncoding |
| MSTRG. 55678. 1 |              | XLOC_049308 | 309 coding  | noncoding | noncoding | noncoding |
| MSTRG. 55720. 1 | LINC00885    | XLOC_049335 | 239 coding  | noncoding | noncoding | noncoding |
| MSTRG. 55718. 1 |              | XLOC_049337 | 268 coding  | noncoding | noncoding | noncoding |
| MSTRG. 55741. 1 | TCTEX1D2     | XLOC_049344 | 369 coding  | noncoding | noncoding | noncoding |
| MSTRG. 55754. 1 | UBXN7        | XLOC_049352 | 257 coding  | noncoding | noncoding | noncoding |
| MSTRG. 55929. 1 |              | XLOC_049364 | 274 coding  | noncoding | noncoding | noncoding |
| MSTRG. 55944. 1 | PAK2         | XLOC_049376 | 362 coding  | noncoding | noncoding | noncoding |
| MSTRG. 55949. 1 | PAK2         | XLOC_049381 | 279 coding  | noncoding | noncoding | noncoding |
| MSTRG. 55776. 1 |              | XLOC_049385 | 285 coding  | noncoding | noncoding | noncoding |
| MSTRG. 55777. 1 |              | XLOC_049386 | 252 coding  | noncoding | noncoding | noncoding |
| NM_001308045. 1 | SENP5        | XLOC_049387 | 6170 coding | coding    | coding    | coding    |
| MSTRG. 55908. 1 | NCBP2AS2     | XLOC_049389 | 300 coding  | noncoding | noncoding | noncoding |
| MSTRG. 55959. 1 |              | XLOC_049406 | 514 coding  | noncoding | noncoding | noncoding |
| MSTRG. 55961. 1 |              | XLOC_049407 | 306 coding  | noncoding | noncoding | noncoding |
| MSTRG. 55968. 1 |              | XLOC_049410 | 241 coding  | noncoding | noncoding | noncoding |
| MSTRG. 56036. 1 | FYTTD1       | XLOC_049433 | 372 coding  | noncoding | noncoding | noncoding |
| MSTRG. 56062. 1 | LOC105374310 | XLOC_049441 | 529 coding  | coding    | noncoding | noncoding |
| MSTRG. 56037. 1 |              | XLOC_049456 | 293 coding  | noncoding | noncoding | noncoding |
| MSTRG. 40648. 1 | LINC01266    | XLOC_049473 | 246 coding  | noncoding | noncoding | noncoding |
| MSTRG. 40669. 1 |              | XLOC_049480 | 309 coding  | noncoding | noncoding | noncoding |
| MSTRG. 40677. 1 |              | XLOC_049486 | 254 coding  | coding    | noncoding | noncoding |
| MSTRG. 40727. 1 | CNTN4        | XLOC_049493 | 296 coding  | noncoding | noncoding | noncoding |
| MSTRG. 40759. 1 | IL5RA        | XLOC_049505 | 342 coding  | noncoding | noncoding | noncoding |
| MSTRG. 40698. 1 |              | XLOC_049507 | 231 coding  | noncoding | noncoding | noncoding |
| MSTRG. 40886. 1 |              | XLOC_049641 | 278 coding  | noncoding | noncoding | noncoding |
| MSTRG. 40894. 1 |              | XLOC_049645 | 232 coding  | noncoding | noncoding | noncoding |
| MSTRG. 40898. 1 |              | XLOC_049647 | 221 coding  | noncoding | noncoding | noncoding |
| MSTRG. 40939. 1 | GRM7         | XLOC_049656 | 243 coding  | noncoding | noncoding | noncoding |
| MSTRG. 40910. 1 |              | XLOC_049672 | 269 coding  | noncoding | noncoding | noncoding |
| MSTRG. 40921. 1 |              | XLOC_049679 | 246 coding  | noncoding | noncoding | noncoding |
| XM_017006535. 1 | SSUH2        | XLOC_049693 | 6564 coding | noncoding | coding    | coding    |
| MSTRG. 41082. 1 |              | XLOC_049710 | 225 coding  | noncoding | noncoding | noncoding |
| MSTRG. 41170. 3 | TTLL3        | XLOC_049718 | 678 coding  | noncoding | noncoding | noncoding |
| MSTRG. 41153. 1 | EMC3         | XLOC_049731 | 870 coding  | noncoding | noncoding | noncoding |

|                |              |             |              |           |           |           |
|----------------|--------------|-------------|--------------|-----------|-----------|-----------|
| NM_018447.3    | EMC3         | XLOC_049732 | 2642 coding  | coding    | coding    | coding    |
| XM_011533330.2 | FANCD2OS     | XLOC_049736 | 1510 coding  | coding    | coding    | coding    |
| MSTRG.41181.1  |              | XLOC_049743 | 293 coding   | noncoding | noncoding | noncoding |
| MSTRG.41368.1  | HRH1         | XLOC_049779 | 331 coding   | noncoding | noncoding | noncoding |
| MSTRG.41385.1  |              | XLOC_049795 | 235 coding   | noncoding | noncoding | noncoding |
| XM_017006966.1 | RAF1         | XLOC_049808 | 2880 coding  | coding    | coding    | coding    |
| MSTRG.41421.1  |              | XLOC_049810 | 254 coding   | noncoding | noncoding | noncoding |
| NM_014869.7    | IQSEC1       | XLOC_049818 | 5518 coding  | coding    | coding    | coding    |
| MSTRG.41502.1  | IQSEC1       | XLOC_049833 | 437 coding   | noncoding | noncoding | noncoding |
| XM_024453855.1 | LOC112267878 | XLOC_049846 | 5057 coding  | noncoding | coding    | coding    |
| MSTRG.41575.1  | LOC112267878 | XLOC_049853 | 284 coding   | noncoding | noncoding | noncoding |
| MSTRG.41580.1  |              | XLOC_049857 | 264 coding   | noncoding | noncoding | noncoding |
| MSTRG.41449.1  |              | XLOC_049868 | 318 coding   | noncoding | noncoding | noncoding |
| MSTRG.41452.1  |              | XLOC_049869 | 303 coding   | noncoding | noncoding | noncoding |
| NM_004625.4    | WNT7A        | XLOC_049884 | 3991 coding  | coding    | coding    | coding    |
| MSTRG.41554.1  | TPRXL        | XLOC_049893 | 267 coding   | noncoding | noncoding | noncoding |
| XR_002959614.1 | LOC112268445 | XLOC_049897 | 8815 coding  | coding    | noncoding | coding    |
| MSTRG.41622.1  | FGD5         | XLOC_049919 | 200 coding   | noncoding | noncoding | noncoding |
| MSTRG.41669.16 | MRPS25       | XLOC_049923 | 11765 coding | coding    | coding    | coding    |
| MSTRG.41657.1  |              | XLOC_049924 | 213 coding   | noncoding | noncoding | noncoding |
| MSTRG.41659.1  |              | XLOC_049926 | 259 coding   | noncoding | noncoding | noncoding |
| MSTRG.41844.14 | BTD          | XLOC_049941 | 239 coding   | noncoding | noncoding | noncoding |
| MSTRG.41844.16 | BTD          | XLOC_049941 | 214 coding   | noncoding | noncoding | noncoding |
| MSTRG.41726.1  |              | XLOC_049970 | 503 coding   | noncoding | noncoding | noncoding |
| MSTRG.41906.1  | RFTN1        | XLOC_050022 | 2645 coding  | coding    | coding    | noncoding |
| MSTRG.41906.12 | OXNAD1       | XLOC_050022 | 3031 coding  | coding    | noncoding | noncoding |
| MSTRG.41906.13 | OXNAD1       | XLOC_050022 | 1491 coding  | coding    | noncoding | noncoding |
| NM_001134381.1 | TBC1D5       | XLOC_050065 | 6519 coding  | coding    | coding    | coding    |
| XM_017007556.1 | TBC1D5       | XLOC_050065 | 6762 coding  | coding    | coding    | coding    |
| MSTRG.42396.1  | TBC1D5       | XLOC_050094 | 265 coding   | noncoding | noncoding | noncoding |
| MSTRG.42434.1  | TBC1D5       | XLOC_050131 | 386 coding   | noncoding | noncoding | noncoding |
| MSTRG.42435.1  | TBC1D5       | XLOC_050132 | 283 coding   | noncoding | noncoding | noncoding |
| MSTRG.42438.1  | TBC1D5       | XLOC_050134 | 223 coding   | noncoding | noncoding | noncoding |
| MSTRG.41972.1  |              | XLOC_050202 | 251 coding   | noncoding | noncoding | noncoding |
| MSTRG.41981.1  | LOC107986066 | XLOC_050205 | 221 coding   | noncoding | noncoding | noncoding |
| MSTRG.41988.1  |              | XLOC_050246 | 285 coding   | coding    | noncoding | noncoding |
| MSTRG.42049.1  |              | XLOC_050257 | 273 coding   | noncoding | noncoding | noncoding |
| MSTRG.42220.1  | LOC105376988 | XLOC_050361 | 248 coding   | noncoding | noncoding | noncoding |
| MSTRG.42214.1  |              | XLOC_050362 | 358 coding   | noncoding | noncoding | noncoding |
| NM_024697.3    | ZNF385D      | XLOC_050365 | 10478 coding | coding    | coding    | coding    |
| XM_011534122.2 | ZNF385D      | XLOC_050365 | 9216 coding  | coding    | coding    | coding    |
| MSTRG.42293.1  | ZNF385D      | XLOC_050382 | 276 coding   | noncoding | noncoding | noncoding |
| MSTRG.42230.1  |              | XLOC_050393 | 206 coding   | noncoding | noncoding | noncoding |

|                 |              |             |             |           |           |           |
|-----------------|--------------|-------------|-------------|-----------|-----------|-----------|
| MSTRG. 42259. 1 |              | XLOC_050405 | 260 coding  | noncoding | noncoding | noncoding |
| MSTRG. 42261. 1 |              | XLOC_050406 | 267 coding  | noncoding | noncoding | noncoding |
| MSTRG. 42317. 1 | LOC105376993 | XLOC_050412 | 272 coding  | noncoding | noncoding | noncoding |
| MSTRG. 42321. 1 |              | XLOC_050414 | 262 coding  | noncoding | noncoding | noncoding |
| MSTRG. 42339. 5 | UBE2E1       | XLOC_050416 | 1946 coding | coding    | noncoding | noncoding |
| MSTRG. 42328. 1 |              | XLOC_050420 | 225 coding  | noncoding | noncoding | noncoding |
| MSTRG. 42334. 2 | NR1D2        | XLOC_050421 | 2799 coding | coding    | noncoding | coding    |
| MSTRG. 42332. 1 |              | XLOC_050425 | 289 coding  | noncoding | noncoding | noncoding |
| MSTRG. 42562. 1 | RARB         | XLOC_050457 | 277 coding  | noncoding | noncoding | noncoding |
| MSTRG. 42578. 1 | RARB         | XLOC_050473 | 218 coding  | noncoding | noncoding | noncoding |
| MSTRG. 42579. 1 | RARB         | XLOC_050474 | 274 coding  | noncoding | noncoding | noncoding |
| MSTRG. 42590. 1 | RARB         | XLOC_050485 | 305 coding  | noncoding | noncoding | noncoding |
| MSTRG. 42531. 1 |              | XLOC_050503 | 240 coding  | noncoding | noncoding | noncoding |
| MSTRG. 42551. 1 |              | XLOC_050514 | 262 coding  | noncoding | noncoding | noncoding |
| MSTRG. 42601. 1 |              | XLOC_050521 | 236 coding  | noncoding | noncoding | noncoding |
| MSTRG. 42605. 1 |              | XLOC_050525 | 294 coding  | coding    | noncoding | noncoding |
| MSTRG. 42624. 1 |              | XLOC_050534 | 269 coding  | noncoding | noncoding | noncoding |
| MSTRG. 42628. 1 |              | XLOC_050537 | 279 coding  | noncoding | noncoding | noncoding |
| MSTRG. 42638. 1 |              | XLOC_050539 | 281 coding  | noncoding | noncoding | noncoding |
| MSTRG. 42641. 1 |              | XLOC_050540 | 216 coding  | noncoding | noncoding | noncoding |
| MSTRG. 42655. 1 | NEK10        | XLOC_050546 | 305 coding  | noncoding | noncoding | noncoding |
| MSTRG. 42855. 1 | ZCWPW2       | XLOC_050608 | 291 coding  | noncoding | noncoding | noncoding |
| MSTRG. 42763. 1 |              | XLOC_050621 | 259 coding  | noncoding | noncoding | noncoding |
| MSTRG. 42782. 1 |              | XLOC_050625 | 248 coding  | noncoding | noncoding | noncoding |
| MSTRG. 42930. 1 | GADL1        | XLOC_050701 | 338 coding  | noncoding | noncoding | noncoding |
| MSTRG. 42931. 1 | GADL1        | XLOC_050702 | 342 coding  | noncoding | noncoding | noncoding |
| MSTRG. 42936. 1 |              | XLOC_050709 | 291 coding  | noncoding | noncoding | noncoding |
| MSTRG. 42939. 1 |              | XLOC_050712 | 342 coding  | noncoding | noncoding | noncoding |
| MSTRG. 42953. 1 |              | XLOC_050718 | 436 coding  | coding    | noncoding | noncoding |
| MSTRG. 43059. 1 | OSBPL10      | XLOC_050734 | 268 coding  | noncoding | noncoding | noncoding |
| MSTRG. 43062. 1 | OSBPL10      | XLOC_050737 | 206 coding  | noncoding | noncoding | noncoding |
| MSTRG. 43081. 1 | OSBPL10      | XLOC_050741 | 297 coding  | noncoding | noncoding | noncoding |
| MSTRG. 43005. 1 |              | XLOC_050762 | 456 coding  | noncoding | noncoding | noncoding |
| MSTRG. 43113. 1 |              | XLOC_050805 | 276 coding  | noncoding | noncoding | noncoding |
| MSTRG. 43116. 1 |              | XLOC_050807 | 249 coding  | noncoding | noncoding | noncoding |
| MSTRG. 43162. 1 |              | XLOC_050812 | 232 coding  | noncoding | noncoding | noncoding |
| MSTRG. 43167. 1 |              | XLOC_050818 | 268 coding  | noncoding | noncoding | noncoding |
| MSTRG. 43187. 1 | GLB1         | XLOC_050825 | 310 coding  | noncoding | noncoding | noncoding |
| MSTRG. 43216. 1 |              | XLOC_050846 | 261 coding  | noncoding | noncoding | noncoding |
| MSTRG. 43367. 1 |              | XLOC_050946 | 239 coding  | noncoding | noncoding | noncoding |
| MSTRG. 43393. 1 | STAC         | XLOC_050949 | 730 coding  | coding    | noncoding | coding    |
| MSTRG. 43399. 1 |              | XLOC_050951 | 305 coding  | coding    | noncoding | noncoding |
| MSTRG. 43420. 1 | TRANK1       | XLOC_050971 | 290 coding  | noncoding | noncoding | noncoding |

|                  |              |             |              |           |           |           |
|------------------|--------------|-------------|--------------|-----------|-----------|-----------|
| MSTRG. 43679. 1  | LRRFIP2      | XLOC_050988 | 262 coding   | noncoding | noncoding | noncoding |
| MSTRG. 43467. 4  | CTDSPL       | XLOC_051053 | 1251 coding  | coding    | noncoding | noncoding |
| MSTRG. 43546. 1  | XYLB         | XLOC_051081 | 274 coding   | noncoding | noncoding | noncoding |
| MSTRG. 43548. 1  | XYLB         | XLOC_051082 | 280 coding   | noncoding | noncoding | noncoding |
| MSTRG. 43554. 1  | XYLB         | XLOC_051087 | 270 coding   | noncoding | noncoding | noncoding |
| MSTRG. 43614. 1  | SCN11A       | XLOC_051125 | 322 coding   | noncoding | noncoding | noncoding |
| MSTRG. 43617. 1  | SCN11A       | XLOC_051126 | 314 coding   | noncoding | noncoding | noncoding |
| MSTRG. 43627. 1  | TTC21A       | XLOC_051132 | 638 coding   | noncoding | noncoding | noncoding |
| MSTRG. 43592. 1  |              | XLOC_051145 | 262 coding   | noncoding | noncoding | noncoding |
| MSTRG. 43657. 1  |              | XLOC_051160 | 300 coding   | noncoding | noncoding | noncoding |
| MSTRG. 43834. 1  | MYRIP        | XLOC_051166 | 268 coding   | noncoding | noncoding | noncoding |
| MSTRG. 43853. 1  | MYRIP        | XLOC_051172 | 282 coding   | noncoding | noncoding | noncoding |
| MSTRG. 43748. 1  |              | XLOC_051177 | 297 coding   | noncoding | noncoding | noncoding |
| MSTRG. 43789. 1  |              | XLOC_051194 | 243 coding   | coding    | noncoding | noncoding |
| MSTRG. 43818. 1  | LOC105377043 | XLOC_051208 | 235 coding   | noncoding | noncoding | noncoding |
| MSTRG. 43905. 1  |              | XLOC_051225 | 252 coding   | noncoding | noncoding | noncoding |
| MSTRG. 43918. 1  |              | XLOC_051235 | 291 coding   | noncoding | noncoding | noncoding |
| MSTRG. 43923. 1  |              | XLOC_051237 | 241 coding   | noncoding | noncoding | noncoding |
| XR_002959565. 1  | HHATL        | XLOC_051245 | 2136 coding  | noncoding | coding    | coding    |
| NM_004391. 3     | CYP8B1       | XLOC_051256 | 3688 coding  | coding    | coding    | coding    |
| MSTRG. 43952. 1  | CYP8B1       | XLOC_051256 | 546 coding   | noncoding | noncoding | noncoding |
| MSTRG. 43964. 1  |              | XLOC_051260 | 280 coding   | noncoding | noncoding | noncoding |
| MSTRG. 44164. 8  | SNRK         | XLOC_051273 | 6132 coding  | coding    | noncoding | noncoding |
| NM_001204831. 2  | ANO10        | XLOC_051275 | 2746 coding  | coding    | coding    | coding    |
| NM_181489. 6     | ZNF445       | XLOC_051310 | 18314 coding | coding    | coding    | coding    |
| NM_020696. 4     | KIAA1143     | XLOC_051327 | 5079 coding  | coding    | coding    | coding    |
| XM_017006562. 1  | ZDHHC3       | XLOC_051329 | 4067 coding  | coding    | coding    | coding    |
| XM_011534024. 1  | CDCP1        | XLOC_051342 | 5965 coding  | noncoding | coding    | coding    |
| MSTRG. 44238. 1  | LOC101928636 | XLOC_051346 | 250 coding   | noncoding | noncoding | noncoding |
| NR_075080. 2     | LZTFL1       | XLOC_051366 | 3901 coding  | coding    | coding    | noncoding |
| XM_006713333. 3  | FYCO1        | XLOC_051370 | 9679 coding  | coding    | coding    | coding    |
| MSTRG. 44368. 3  | CCR2         | XLOC_051406 | 3705 coding  | coding    | noncoding | noncoding |
| MSTRG. 44377. 1  | LOC102724297 | XLOC_051408 | 413 coding   | noncoding | noncoding | noncoding |
| XR_940406. 2     | ALS2CL       | XLOC_051434 | 6609 coding  | coding    | coding    | coding    |
| MSTRG. 44457. 1  |              | XLOC_051443 | 315 coding   | noncoding | noncoding | noncoding |
| MSTRG. 44463. 1  |              | XLOC_051446 | 311 coding   | coding    | noncoding | noncoding |
| XR_002959493. 1  | CCDC12       | XLOC_051449 | 7770 coding  | coding    | coding    | coding    |
| MSTRG. 44576. 13 | CCDC12       | XLOC_051449 | 13463 coding | coding    | coding    | coding    |
| XM_005264967. 2  | SCAP         | XLOC_051470 | 4207 coding  | coding    | coding    | coding    |
| XM_011533852. 3  | ELP6         | XLOC_051473 | 2934 coding  | coding    | coding    | coding    |
| MSTRG. 44500. 1  | SMARCC1      | XLOC_051477 | 310 coding   | noncoding | noncoding | noncoding |
| MSTRG. 44507. 1  | SMARCC1      | XLOC_051484 | 295 coding   | noncoding | noncoding | noncoding |
| MSTRG. 44558. 1  | MAP4         | XLOC_051498 | 246 coding   | noncoding | noncoding | noncoding |

|                 |              |             |              |           |           |           |
|-----------------|--------------|-------------|--------------|-----------|-----------|-----------|
| MSTRG. 44494. 1 |              | XLOC_051504 | 254 coding   | noncoding | noncoding | noncoding |
| XR_940457. 2    | PLXNB1       | XLOC_051518 | 11147 coding | coding    | coding    | coding    |
| MSTRG. 44617. 3 | UQCRC1       | XLOC_051530 | 255 coding   | noncoding | noncoding | noncoding |
| MSTRG. 44609. 1 |              | XLOC_051533 | 218 coding   | noncoding | noncoding | noncoding |
| MSTRG. 44634. 1 | LINC02585    | XLOC_051538 | 243 coding   | noncoding | noncoding | noncoding |
| MSTRG. 44642. 1 | IP6K2        | XLOC_051540 | 283 coding   | noncoding | noncoding | noncoding |
| MSTRG. 44643. 1 | IP6K2        | XLOC_051541 | 291 coding   | noncoding | noncoding | noncoding |
| MSTRG. 44644. 1 | IP6K2        | XLOC_051542 | 252 coding   | noncoding | noncoding | noncoding |
| MSTRG. 44651. 1 | PRKAR2A      | XLOC_051547 | 282 coding   | noncoding | noncoding | noncoding |
| MSTRG. 44653. 1 | PRKAR2A      | XLOC_051549 | 287 coding   | noncoding | noncoding | noncoding |
| MSTRG. 44724. 1 | C3orf62      | XLOC_051577 | 229 coding   | noncoding | noncoding | noncoding |
| NM_001313946. 2 | RHOA         | XLOC_051584 | 1553 coding  | coding    | coding    | noncoding |
| MSTRG. 44709. 1 |              | XLOC_051589 | 222 coding   | noncoding | noncoding | noncoding |
| MSTRG. 44752. 1 | BSN          | XLOC_051593 | 270 coding   | noncoding | noncoding | noncoding |
| MSTRG. 44753. 1 | BSN          | XLOC_051594 | 225 coding   | noncoding | noncoding | noncoding |
| MSTRG. 44754. 1 | BSN          | XLOC_051595 | 239 coding   | noncoding | noncoding | noncoding |
| MSTRG. 44757. 1 | BSN          | XLOC_051596 | 402 coding   | noncoding | coding    | noncoding |
| MSTRG. 44760. 2 | MST1         | XLOC_051598 | 10522 coding | coding    | coding    | coding    |
| MSTRG. 44769. 1 | IP6K1        | XLOC_051601 | 380 coding   | noncoding | noncoding | noncoding |
| MSTRG. 44783. 1 | SEMA3F-AS1   | XLOC_051622 | 268 coding   | noncoding | noncoding | noncoding |
| MSTRG. 44773. 1 | GNAT1        | XLOC_051623 | 584 coding   | noncoding | noncoding | coding    |
| MSTRG. 44821. 1 | HYAL3        | XLOC_051633 | 246 coding   | noncoding | noncoding | noncoding |
| NR_047690. 1    | HYAL1        | XLOC_051635 | 2547 coding  | coding    | coding    | coding    |
| XR_001739982. 1 | NPRL2        | XLOC_051641 | 1435 coding  | coding    | coding    | coding    |
| MSTRG. 44828. 1 |              | XLOC_051660 | 297 coding   | noncoding | noncoding | noncoding |
| MSTRG. 44895. 1 |              | XLOC_051673 | 223 coding   | noncoding | noncoding | noncoding |
| MSTRG. 45009. 1 | DOCK3        | XLOC_051699 | 308 coding   | noncoding | noncoding | noncoding |
| MSTRG. 44908. 1 | GRM2         | XLOC_051720 | 319 coding   | coding    | noncoding | noncoding |
| MSTRG. 44903. 1 |              | XLOC_051724 | 309 coding   | noncoding | noncoding | noncoding |
| MSTRG. 44911. 1 |              | XLOC_051726 | 234 coding   | coding    | noncoding | noncoding |
| MSTRG. 44912. 1 |              | XLOC_051729 | 224 coding   | noncoding | noncoding | noncoding |
| MSTRG. 44961. 1 | POC1A        | XLOC_051750 | 253 coding   | noncoding | noncoding | noncoding |
| MSTRG. 45131. 1 | SFMBT1       | XLOC_051809 | 317 coding   | noncoding | coding    | noncoding |
| MSTRG. 45158. 1 |              | XLOC_051826 | 248 coding   | noncoding | noncoding | noncoding |
| MSTRG. 45183. 1 |              | XLOC_051869 | 254 coding   | noncoding | noncoding | noncoding |
| MSTRG. 45189. 1 | LOC105377095 | XLOC_051873 | 303 coding   | noncoding | noncoding | noncoding |
| MSTRG. 45190. 1 | LOC105377095 | XLOC_051874 | 265 coding   | noncoding | noncoding | noncoding |
| MSTRG. 45286. 1 | CACNA2D3     | XLOC_051886 | 300 coding   | coding    | noncoding | noncoding |
| MSTRG. 45292. 1 | CACNA2D3     | XLOC_051891 | 233 coding   | noncoding | noncoding | noncoding |
| MSTRG. 45253. 1 |              | XLOC_051907 | 280 coding   | noncoding | noncoding | noncoding |
| MSTRG. 45254. 1 |              | XLOC_051908 | 237 coding   | noncoding | noncoding | noncoding |
| MSTRG. 45267. 1 |              | XLOC_051915 | 245 coding   | noncoding | noncoding | noncoding |
| MSTRG. 45356. 1 | ERC2         | XLOC_051938 | 261 coding   | noncoding | noncoding | noncoding |

|                |              |             |             |           |           |           |
|----------------|--------------|-------------|-------------|-----------|-----------|-----------|
| MSTRG.45358.1  | ERC2         | XLOC_051939 | 201 coding  | noncoding | noncoding | noncoding |
| MSTRG.45364.1  | ERC2         | XLOC_051942 | 391 coding  | noncoding | noncoding | noncoding |
| MSTRG.45382.1  |              | XLOC_051952 | 333 coding  | noncoding | noncoding | noncoding |
| MSTRG.45419.1  | ARHGEF3      | XLOC_051976 | 246 coding  | noncoding | noncoding | noncoding |
| MSTRG.45424.1  | ARHGEF3      | XLOC_051981 | 307 coding  | noncoding | noncoding | noncoding |
| MSTRG.45425.1  | ARHGEF3      | XLOC_051982 | 291 coding  | noncoding | noncoding | noncoding |
| MSTRG.45426.1  | ARHGEF3      | XLOC_051983 | 242 coding  | noncoding | noncoding | noncoding |
| MSTRG.45432.1  | ARHGEF3      | XLOC_051986 | 227 coding  | noncoding | noncoding | noncoding |
| XM_005265238.4 | IL17RD       | XLOC_051988 | 8955 coding | coding    | coding    | coding    |
| XM_005265526.4 | HESX1        | XLOC_051991 | 2375 coding | coding    | noncoding | coding    |
| MSTRG.45451.1  | DNAH12       | XLOC_051995 | 329 coding  | noncoding | noncoding | noncoding |
| XM_006713020.2 | DENND6A      | XLOC_052008 | 4890 coding | coding    | coding    | coding    |
| MSTRG.45495.1  |              | XLOC_052017 | 293 coding  | noncoding | noncoding | noncoding |
| MSTRG.45505.1  | DNASE1L3     | XLOC_052023 | 309 coding  | noncoding | noncoding | noncoding |
| MSTRG.45544.1  |              | XLOC_052036 | 633 coding  | noncoding | noncoding | noncoding |
| MSTRG.45546.1  |              | XLOC_052038 | 350 coding  | noncoding | noncoding | noncoding |
| MSTRG.45581.1  | LOC105377109 | XLOC_052053 | 286 coding  | noncoding | noncoding | noncoding |
| MSTRG.47058.1  | FHIT         | XLOC_052100 | 284 coding  | noncoding | noncoding | noncoding |
| MSTRG.47096.1  | FHIT         | XLOC_052121 | 317 coding  | noncoding | noncoding | noncoding |
| MSTRG.47196.1  | FHIT         | XLOC_052135 | 356 coding  | noncoding | noncoding | noncoding |
| MSTRG.47209.1  | FHIT         | XLOC_052144 | 374 coding  | noncoding | noncoding | noncoding |
| MSTRG.47228.1  | FHIT         | XLOC_052158 | 251 coding  | noncoding | noncoding | noncoding |
| MSTRG.47231.1  | FHIT         | XLOC_052159 | 267 coding  | noncoding | noncoding | noncoding |
| MSTRG.45611.1  |              | XLOC_052163 | 299 coding  | noncoding | noncoding | noncoding |
| MSTRG.45630.1  | PTPRG        | XLOC_052164 | 319 coding  | noncoding | noncoding | noncoding |
| MSTRG.45640.1  | PTPRG        | XLOC_052169 | 325 coding  | coding    | coding    | noncoding |
| MSTRG.45668.1  | PTPRG        | XLOC_052184 | 287 coding  | noncoding | noncoding | noncoding |
| NR_038281.1    | PTPRG-AS1    | XLOC_052185 | 2682 coding | noncoding | noncoding | noncoding |
| MSTRG.45740.1  | CADPS        | XLOC_052198 | 237 coding  | noncoding | noncoding | noncoding |
| MSTRG.45625.1  |              | XLOC_052205 | 312 coding  | noncoding | noncoding | noncoding |
| MSTRG.45676.1  |              | XLOC_052208 | 247 coding  | noncoding | noncoding | noncoding |
| MSTRG.45698.1  | SYNPR        | XLOC_052210 | 216 coding  | noncoding | noncoding | noncoding |
| MSTRG.45710.1  | SYNPR        | XLOC_052216 | 208 coding  | noncoding | noncoding | noncoding |
| MSTRG.45711.1  | SYNPR        | XLOC_052217 | 306 coding  | noncoding | noncoding | noncoding |
| MSTRG.45715.1  | SYNPR        | XLOC_052219 | 289 coding  | noncoding | noncoding | noncoding |
| MSTRG.45679.1  |              | XLOC_052225 | 264 coding  | noncoding | noncoding | noncoding |
| XR_001740729.1 | LOC100130345 | XLOC_052230 | 7230 coding | noncoding | coding    | noncoding |
| NM_001271779.1 | PSMD6        | XLOC_052236 | 1635 coding | coding    | coding    | coding    |
| MSTRG.45757.1  | PRICKLE2-AS1 | XLOC_052241 | 277 coding  | noncoding | noncoding | noncoding |
| MSTRG.45778.1  | PRICKLE2     | XLOC_052252 | 207 coding  | noncoding | noncoding | noncoding |
| MSTRG.45791.1  | ADAMTS9      | XLOC_052257 | 202 coding  | noncoding | noncoding | noncoding |
| MSTRG.45754.1  |              | XLOC_052262 | 295 coding  | noncoding | noncoding | noncoding |
| NM_001365903.2 | MAGI1        | XLOC_052274 | 8030 coding | coding    | coding    | coding    |

|               |              |             |             |           |           |           |
|---------------|--------------|-------------|-------------|-----------|-----------|-----------|
| MSTRG.45836.1 | MAGI1        | XLOC_052282 | 254 coding  | noncoding | noncoding | noncoding |
| MSTRG.45859.1 | MAGI1        | XLOC_052292 | 327 coding  | noncoding | noncoding | noncoding |
| MSTRG.45885.1 | LOC105377141 | XLOC_052312 | 287 coding  | noncoding | noncoding | noncoding |
| MSTRG.46280.1 | SUCLG2-AS1   | XLOC_052396 | 294 coding  | noncoding | noncoding | noncoding |
| MSTRG.45944.1 |              | XLOC_052448 | 268 coding  | noncoding | noncoding | noncoding |
| MSTRG.45964.1 | TMF1         | XLOC_052461 | 270 coding  | noncoding | noncoding | noncoding |
| MSTRG.46036.1 | FRMD4B       | XLOC_052483 | 266 coding  | noncoding | noncoding | noncoding |
| MSTRG.46009.1 |              | XLOC_052503 | 210 coding  | noncoding | noncoding | noncoding |
| MSTRG.47678.1 |              | XLOC_052538 | 377 coding  | noncoding | noncoding | noncoding |
| MSTRG.47702.2 | PROK2        | XLOC_052555 | 2322 coding | coding    | noncoding | noncoding |
| MSTRG.46146.1 |              | XLOC_052560 | 217 coding  | noncoding | noncoding | noncoding |
| MSTRG.46330.1 | LINC00877    | XLOC_052596 | 235 coding  | noncoding | noncoding | noncoding |
| MSTRG.46300.1 |              | XLOC_052605 | 274 coding  | noncoding | noncoding | noncoding |
| MSTRG.46360.1 |              | XLOC_052643 | 288 coding  | noncoding | noncoding | noncoding |
| MSTRG.46373.1 | LOC107986098 | XLOC_052650 | 276 coding  | noncoding | noncoding | noncoding |
| MSTRG.46408.1 | LINC02005    | XLOC_052673 | 301 coding  | noncoding | noncoding | noncoding |
| MSTRG.46449.1 |              | XLOC_052688 | 240 coding  | noncoding | noncoding | noncoding |
| MSTRG.46502.1 |              | XLOC_052711 | 257 coding  | noncoding | noncoding | noncoding |
| MSTRG.46506.1 |              | XLOC_052714 | 235 coding  | noncoding | noncoding | noncoding |
| MSTRG.46616.1 | ROBO2        | XLOC_052737 | 249 coding  | noncoding | noncoding | noncoding |
| MSTRG.46549.1 |              | XLOC_052780 | 255 coding  | noncoding | noncoding | noncoding |
| MSTRG.46551.1 |              | XLOC_052782 | 203 coding  | noncoding | noncoding | noncoding |
| MSTRG.46552.1 |              | XLOC_052783 | 246 coding  | noncoding | noncoding | noncoding |
| MSTRG.46719.1 | ROBO1        | XLOC_052800 | 230 coding  | noncoding | noncoding | noncoding |
| MSTRG.46733.1 | ROBO1        | XLOC_052806 | 310 coding  | noncoding | coding    | noncoding |
| MSTRG.46663.1 |              | XLOC_052815 | 289 coding  | noncoding | noncoding | noncoding |
| MSTRG.46749.1 | LOC105377177 | XLOC_052821 | 270 coding  | noncoding | noncoding | noncoding |
| MSTRG.46759.1 | LOC105377177 | XLOC_052824 | 273 coding  | noncoding | noncoding | noncoding |
| MSTRG.46760.1 | LOC105377177 | XLOC_052825 | 312 coding  | noncoding | noncoding | noncoding |
| MSTRG.46773.1 | LINC02027    | XLOC_052833 | 321 coding  | noncoding | noncoding | noncoding |
| MSTRG.46788.1 |              | XLOC_052843 | 308 coding  | noncoding | noncoding | noncoding |
| MSTRG.46808.1 | LINC02008    | XLOC_052860 | 273 coding  | noncoding | noncoding | noncoding |
| MSTRG.46839.1 |              | XLOC_052878 | 211 coding  | noncoding | noncoding | noncoding |
| MSTRG.46848.1 |              | XLOC_052886 | 263 coding  | noncoding | noncoding | noncoding |
| MSTRG.46899.1 | CADM2        | XLOC_052897 | 221 coding  | noncoding | noncoding | noncoding |
| MSTRG.46910.1 | CADM2        | XLOC_052903 | 247 coding  | noncoding | noncoding | noncoding |
| MSTRG.46920.1 | CADM2        | XLOC_052908 | 298 coding  | noncoding | noncoding | noncoding |
| MSTRG.46871.1 |              | XLOC_052911 | 284 coding  | noncoding | noncoding | noncoding |
| MSTRG.46873.1 |              | XLOC_052912 | 365 coding  | noncoding | noncoding | noncoding |
| MSTRG.46881.1 | LOC102723364 | XLOC_052914 | 227 coding  | noncoding | noncoding | noncoding |
| MSTRG.46890.1 |              | XLOC_052920 | 366 coding  | coding    | noncoding | noncoding |
| MSTRG.46933.1 |              | XLOC_052925 | 214 coding  | noncoding | noncoding | noncoding |
| MSTRG.46985.1 |              | XLOC_052945 | 253 coding  | coding    | noncoding | noncoding |

|                 |              |             |             |           |           |           |
|-----------------|--------------|-------------|-------------|-----------|-----------|-----------|
| MSTRG. 46988. 1 |              | XLOC_052947 | 269 coding  | noncoding | noncoding | noncoding |
| MSTRG. 47272. 1 |              | XLOC_052986 | 233 coding  | noncoding | noncoding | noncoding |
| MSTRG. 47275. 1 |              | XLOC_052988 | 277 coding  | coding    | noncoding | noncoding |
| MSTRG. 47308. 1 | EPHA3        | XLOC_052998 | 277 coding  | noncoding | noncoding | noncoding |
| MSTRG. 47311. 1 | EPHA3        | XLOC_052999 | 263 coding  | noncoding | noncoding | noncoding |
| MSTRG. 47293. 1 |              | XLOC_053008 | 218 coding  | noncoding | noncoding | noncoding |
| MSTRG. 47390. 1 | PROS1        | XLOC_053034 | 391 coding  | noncoding | noncoding | noncoding |
| MSTRG. 47460. 3 | DHFR2        | XLOC_053046 | 8863 coding | coding    | coding    | coding    |
| MSTRG. 47397. 1 |              | XLOC_053051 | 224 coding  | noncoding | noncoding | noncoding |
| MSTRG. 47416. 1 |              | XLOC_053060 | 230 coding  | noncoding | noncoding | noncoding |
| MSTRG. 47431. 1 |              | XLOC_053070 | 292 coding  | coding    | noncoding | noncoding |
| MSTRG. 47480. 1 |              | XLOC_053076 | 288 coding  | noncoding | coding    | noncoding |
| NM_001105580. 2 | GABRR3       | XLOC_053120 | 1521 coding | coding    | coding    | coding    |
| MSTRG. 47559. 1 | LOC101929320 | XLOC_053128 | 287 coding  | noncoding | noncoding | noncoding |
| MSTRG. 47566. 1 |              | XLOC_053133 | 204 coding  | noncoding | noncoding | noncoding |
| MSTRG. 47569. 1 |              | XLOC_053136 | 278 coding  | noncoding | noncoding | noncoding |
| MSTRG. 47577. 1 |              | XLOC_053140 | 249 coding  | noncoding | noncoding | noncoding |
| MSTRG. 47607. 1 |              | XLOC_053148 | 302 coding  | noncoding | noncoding | noncoding |
| MSTRG. 47609. 1 |              | XLOC_053149 | 224 coding  | noncoding | noncoding | noncoding |
| MSTRG. 47789. 9 | TBC1D23      | XLOC_053190 | 1080 coding | coding    | noncoding | noncoding |
| MSTRG. 47784. 1 | ADGRG7       | XLOC_053214 | 254 coding  | noncoding | noncoding | noncoding |
| MSTRG. 47826. 1 |              | XLOC_053218 | 277 coding  | noncoding | noncoding | noncoding |
| NM_016247. 4    | IMPG2        | XLOC_053222 | 8352 coding | coding    | coding    | coding    |
| MSTRG. 47963. 1 |              | XLOC_053306 | 276 coding  | noncoding | noncoding | noncoding |
| MSTRG. 47988. 1 |              | XLOC_053322 | 269 coding  | noncoding | noncoding | noncoding |
| MSTRG. 48073. 1 |              | XLOC_053328 | 282 coding  | noncoding | noncoding | noncoding |
| MSTRG. 48091. 1 |              | XLOC_053334 | 255 coding  | noncoding | noncoding | noncoding |
| MSTRG. 48081. 1 |              | XLOC_053335 | 451 coding  | noncoding | noncoding | noncoding |
| MSTRG. 48083. 1 |              | XLOC_053339 | 213 coding  | noncoding | noncoding | noncoding |
| MSTRG. 48085. 1 |              | XLOC_053342 | 276 coding  | noncoding | noncoding | noncoding |
| MSTRG. 48101. 1 |              | XLOC_053349 | 262 coding  | coding    | noncoding | noncoding |
| MSTRG. 48107. 1 | LOC105374019 | XLOC_053352 | 282 coding  | noncoding | noncoding | noncoding |
| XR_924302. 2    | LOC105374021 | XLOC_053358 | 3841 coding | noncoding | noncoding | noncoding |
| MSTRG. 48167. 1 |              | XLOC_053434 | 289 coding  | noncoding | noncoding | noncoding |
| MSTRG. 48196. 1 |              | XLOC_053446 | 217 coding  | noncoding | noncoding | noncoding |
| MSTRG. 48214. 1 | LOC101929485 | XLOC_053458 | 212 coding  | noncoding | noncoding | noncoding |
| MSTRG. 48216. 1 | LOC101929485 | XLOC_053459 | 247 coding  | noncoding | noncoding | noncoding |
| MSTRG. 48217. 1 | LOC101929485 | XLOC_053460 | 381 coding  | noncoding | noncoding | noncoding |
| MSTRG. 48220. 1 | LOC101929485 | XLOC_053461 | 621 coding  | noncoding | noncoding | noncoding |
| MSTRG. 48208. 1 |              | XLOC_053464 | 268 coding  | noncoding | noncoding | noncoding |
| MSTRG. 48221. 1 |              | XLOC_053466 | 401 coding  | coding    | noncoding | noncoding |
| MSTRG. 48227. 1 |              | XLOC_053468 | 375 coding  | noncoding | noncoding | noncoding |
| MSTRG. 48249. 1 |              | XLOC_053480 | 202 coding  | noncoding | noncoding | noncoding |

|                |           |             |             |           |           |           |
|----------------|-----------|-------------|-------------|-----------|-----------|-----------|
| MSTRG.48624.1  |           | XLOC_053524 | 686 coding  | noncoding | noncoding | noncoding |
| MSTRG.48331.1  |           | XLOC_053533 | 236 coding  | noncoding | noncoding | noncoding |
| XM_011512691.1 | MORC1     | XLOC_053562 | 3812 coding | coding    | coding    | coding    |
| XM_011512444.3 | DPPA2     | XLOC_053568 | 1402 coding | coding    | noncoding | coding    |
| MSTRG.48382.1  | LINC01205 | XLOC_053573 | 324 coding  | noncoding | noncoding | noncoding |
| MSTRG.48384.1  |           | XLOC_053574 | 206 coding  | noncoding | noncoding | noncoding |
| MSTRG.48436.1  |           | XLOC_053585 | 202 coding  | noncoding | noncoding | noncoding |
| MSTRG.48448.1  |           | XLOC_053595 | 301 coding  | noncoding | coding    | noncoding |
| MSTRG.48461.1  |           | XLOC_053609 | 270 coding  | noncoding | noncoding | noncoding |
| MSTRG.48548.1  |           | XLOC_053618 | 303 coding  | noncoding | noncoding | noncoding |
| MSTRG.48555.1  |           | XLOC_053640 | 298 coding  | coding    | noncoding | noncoding |
| MSTRG.48776.1  |           | XLOC_053735 | 317 coding  | coding    | noncoding | noncoding |
| MSTRG.48888.4  | SPICE1    | XLOC_053766 | 777 coding  | coding    | coding    | noncoding |
| MSTRG.48843.1  |           | XLOC_053777 | 220 coding  | noncoding | noncoding | noncoding |
| MSTRG.48932.1  | GRAMD1C   | XLOC_053789 | 492 coding  | noncoding | noncoding | noncoding |
| MSTRG.50085.1  | ZBTB20    | XLOC_053916 | 268 coding  | noncoding | noncoding | noncoding |
| NM_001318915.2 | LSAMP     | XLOC_054037 | 9485 coding | coding    | coding    | coding    |
| MSTRG.49039.1  |           | XLOC_054055 | 222 coding  | noncoding | noncoding | noncoding |
| MSTRG.49086.1  |           | XLOC_054063 | 271 coding  | coding    | noncoding | noncoding |
| MSTRG.49136.1  |           | XLOC_054084 | 281 coding  | noncoding | noncoding | noncoding |
| MSTRG.49150.1  |           | XLOC_054091 | 229 coding  | coding    | noncoding | noncoding |
| MSTRG.49154.1  |           | XLOC_054106 | 282 coding  | noncoding | noncoding | noncoding |
| MSTRG.49209.1  | IGSF11    | XLOC_054114 | 254 coding  | noncoding | noncoding | noncoding |
| MSTRG.49301.1  | GPR156    | XLOC_054219 | 219 coding  | noncoding | noncoding | noncoding |
| MSTRG.49302.1  | GPR156    | XLOC_054220 | 277 coding  | noncoding | noncoding | noncoding |
| MSTRG.49429.1  | STXBP5L   | XLOC_054249 | 308 coding  | noncoding | noncoding | noncoding |
| MSTRG.49432.1  | STXBP5L   | XLOC_054251 | 395 coding  | noncoding | noncoding | noncoding |
| MSTRG.49434.1  | STXBP5L   | XLOC_054252 | 258 coding  | noncoding | noncoding | noncoding |
| MSTRG.49437.1  | STXBP5L   | XLOC_054253 | 280 coding  | coding    | noncoding | noncoding |
| MSTRG.49439.1  | STXBP5L   | XLOC_054255 | 205 coding  | noncoding | noncoding | noncoding |
| MSTRG.49448.1  | ARGFX     | XLOC_054261 | 288 coding  | noncoding | noncoding | noncoding |
| MSTRG.49463.1  | FBXO40    | XLOC_054263 | 225 coding  | noncoding | noncoding | noncoding |
| XM_017005697.2 | CCDC58    | XLOC_054316 | 487 coding  | coding    | noncoding | coding    |
| MSTRG.49606.3  | PARP14    | XLOC_054328 | 7885 coding | coding    | coding    | noncoding |
| MSTRG.49756.3  | UMPS      | XLOC_054415 | 1472 coding | coding    | noncoding | noncoding |
| MSTRG.49768.1  | ITGB5     | XLOC_054422 | 230 coding  | noncoding | noncoding | noncoding |
| MSTRG.49762.1  | MUC13     | XLOC_054427 | 291 coding  | noncoding | noncoding | noncoding |
| NM_024628.5    | SLC12A8   | XLOC_054432 | 3510 coding | coding    | coding    | coding    |
| MSTRG.49803.1  | SNX4      | XLOC_054476 | 306 coding  | noncoding | noncoding | noncoding |
| MSTRG.49848.1  |           | XLOC_054489 | 255 coding  | noncoding | noncoding | noncoding |
| MSTRG.49855.1  |           | XLOC_054492 | 220 coding  | noncoding | noncoding | noncoding |
| MSTRG.49859.1  |           | XLOC_054495 | 284 coding  | noncoding | noncoding | noncoding |
| MSTRG.49870.1  |           | XLOC_054496 | 296 coding  | coding    | noncoding | noncoding |

|                  |              |             |             |           |           |           |
|------------------|--------------|-------------|-------------|-----------|-----------|-----------|
| XR_001740875. 2  | LOC102723696 | XLOC_054499 | 1723 coding | noncoding | noncoding | noncoding |
| MSTRG. 50226. 1  | CHCHD6       | XLOC_054549 | 255 coding  | noncoding | noncoding | noncoding |
| MSTRG. 50228. 1  | CHCHD6       | XLOC_054551 | 278 coding  | coding    | noncoding | noncoding |
| MSTRG. 50184. 1  | PLXNA1       | XLOC_054588 | 245 coding  | coding    | noncoding | noncoding |
| MSTRG. 50395. 1  | RUVBL1       | XLOC_054651 | 220 coding  | noncoding | noncoding | noncoding |
| MSTRG. 50339. 1  |              | XLOC_054701 | 256 coding  | noncoding | noncoding | noncoding |
| MSTRG. 50351. 1  | RPN1         | XLOC_054708 | 317 coding  | noncoding | noncoding | noncoding |
| MSTRG. 50352. 1  |              | XLOC_054711 | 281 coding  | noncoding | noncoding | noncoding |
| MSTRG. 50452. 1  |              | XLOC_054733 | 248 coding  | noncoding | noncoding | noncoding |
| MSTRG. 50471. 1  | CNBP         | XLOC_054736 | 492 coding  | noncoding | noncoding | noncoding |
| MSTRG. 50503. 1  |              | XLOC_054752 | 279 coding  | noncoding | noncoding | noncoding |
| MSTRG. 50529. 1  |              | XLOC_054768 | 390 coding  | noncoding | noncoding | noncoding |
| MSTRG. 50602. 1  | TMCC1        | XLOC_054772 | 225 coding  | noncoding | noncoding | noncoding |
| MSTRG. 50604. 1  | TMCC1        | XLOC_054773 | 366 coding  | noncoding | noncoding | noncoding |
| MSTRG. 50583. 1  |              | XLOC_054839 | 345 coding  | noncoding | noncoding | noncoding |
| MSTRG. 50593. 1  | COL6A5       | XLOC_054841 | 206 coding  | coding    | noncoding | noncoding |
| MSTRG. 50847. 1  | LOC339874    | XLOC_054886 | 296 coding  | noncoding | noncoding | noncoding |
| NM_130808. 2     | CPNE4        | XLOC_054903 | 4186 coding | coding    | coding    | coding    |
| MSTRG. 50718. 1  | CPNE4        | XLOC_054908 | 247 coding  | noncoding | noncoding | noncoding |
| MSTRG. 50721. 1  | CPNE4        | XLOC_054909 | 218 coding  | noncoding | noncoding | noncoding |
| MSTRG. 50751. 1  | CPNE4        | XLOC_054919 | 264 coding  | noncoding | noncoding | noncoding |
| MSTRG. 50928. 1  | NPHP3-AS1    | XLOC_054951 | 219 coding  | noncoding | noncoding | noncoding |
| MSTRG. 50879. 1  | TMEM108      | XLOC_054957 | 288 coding  | noncoding | noncoding | noncoding |
| MSTRG. 50931. 6  | CDV3         | XLOC_054967 | 2561 coding | coding    | coding    | noncoding |
| MSTRG. 50931. 10 | CDV3         | XLOC_054967 | 2540 coding | coding    | coding    | noncoding |
| MSTRG. 50960. 1  | TOPBP1       | XLOC_054971 | 352 coding  | noncoding | noncoding | noncoding |
| MSTRG. 50948. 1  |              | XLOC_054991 | 269 coding  | noncoding | noncoding | noncoding |
| MSTRG. 51661. 40 | KY           | XLOC_055016 | 8034 coding | noncoding | noncoding | noncoding |
| XR_001739978. 1  | STAG1        | XLOC_055052 | 2816 coding | coding    | coding    | coding    |
| MSTRG. 51129. 1  | STAG1        | XLOC_055062 | 248 coding  | noncoding | noncoding | noncoding |
| MSTRG. 51138. 1  | STAG1        | XLOC_055070 | 260 coding  | noncoding | noncoding | noncoding |
| MSTRG. 51049. 1  |              | XLOC_055076 | 300 coding  | noncoding | noncoding | noncoding |
| MSTRG. 51069. 1  |              | XLOC_055100 | 365 coding  | noncoding | noncoding | noncoding |
| MSTRG. 51083. 1  |              | XLOC_055110 | 315 coding  | noncoding | noncoding | noncoding |
| MSTRG. 51096. 1  | LOC105374126 | XLOC_055115 | 340 coding  | noncoding | noncoding | noncoding |
| MSTRG. 51104. 1  |              | XLOC_055120 | 216 coding  | noncoding | noncoding | noncoding |
| XR_001740930. 1  | LOC105374128 | XLOC_055125 | 4212 coding | noncoding | noncoding | noncoding |
| MSTRG. 51215. 5  | ARMC8        | XLOC_055132 | 2739 coding | coding    | coding    | coding    |
| MSTRG. 51207. 1  |              | XLOC_055142 | 232 coding  | noncoding | noncoding | noncoding |
| MSTRG. 51273. 1  |              | XLOC_055150 | 249 coding  | noncoding | noncoding | noncoding |
| MSTRG. 51285. 1  | PIK3CB       | XLOC_055160 | 321 coding  | coding    | noncoding | noncoding |
| MSTRG. 51244. 1  |              | XLOC_055161 | 241 coding  | noncoding | noncoding | noncoding |
| MSTRG. 51250. 1  |              | XLOC_055169 | 355 coding  | noncoding | noncoding | noncoding |

|                 |              |             |             |           |           |           |
|-----------------|--------------|-------------|-------------|-----------|-----------|-----------|
| MSTRG. 51252. 1 |              | XLOC_055173 | 287 coding  | noncoding | noncoding | noncoding |
| MSTRG. 51262. 1 |              | XLOC_055178 | 276 coding  | noncoding | noncoding | noncoding |
| MSTRG. 51263. 1 |              | XLOC_055179 | 279 coding  | noncoding | noncoding | noncoding |
| XM_024453831. 1 | COPB2        | XLOC_055183 | 4924 coding | coding    | coding    | coding    |
| MSTRG. 51398. 1 | LOC100507291 | XLOC_055188 | 253 coding  | noncoding | noncoding | noncoding |
| MSTRG. 51289. 1 |              | XLOC_055230 | 282 coding  | noncoding | noncoding | noncoding |
| MSTRG. 51319. 1 | CLSTN2       | XLOC_055238 | 267 coding  | noncoding | noncoding | noncoding |
| MSTRG. 51342. 1 |              | XLOC_055254 | 285 coding  | noncoding | noncoding | noncoding |
| MSTRG. 51349. 1 | SPSB4        | XLOC_055259 | 282 coding  | noncoding | noncoding | noncoding |
| MSTRG. 51448. 1 | LINC02618    | XLOC_055275 | 313 coding  | noncoding | noncoding | noncoding |
| XM_024453725. 1 | TFDP2        | XLOC_055286 | 9730 coding | coding    | coding    | coding    |
| MSTRG. 51528. 1 | TFDP2        | XLOC_055287 | 232 coding  | noncoding | noncoding | noncoding |
| MSTRG. 51529. 1 | TFDP2        | XLOC_055288 | 204 coding  | noncoding | noncoding | noncoding |
| MSTRG. 51619. 1 | XRN1         | XLOC_055306 | 239 coding  | noncoding | noncoding | noncoding |
| MSTRG. 51643. 1 | ATR          | XLOC_055328 | 229 coding  | noncoding | noncoding | noncoding |
| MSTRG. 51570. 1 |              | XLOC_055360 | 215 coding  | noncoding | noncoding | noncoding |
| NM_198504. 3    | PAQR9        | XLOC_055363 | 2437 coding | coding    | coding    | coding    |
| MSTRG. 51600. 1 | LOC105374138 | XLOC_055374 | 301 coding  | noncoding | noncoding | noncoding |
| MSTRG. 51649. 1 |              | XLOC_055428 | 291 coding  | noncoding | noncoding | noncoding |
| MSTRG. 51870. 1 | LOC105374140 | XLOC_055485 | 245 coding  | noncoding | noncoding | noncoding |
| MSTRG. 51741. 1 |              | XLOC_055495 | 422 coding  | coding    | noncoding | noncoding |
| MSTRG. 51753. 1 |              | XLOC_055500 | 278 coding  | coding    | noncoding | noncoding |
| MSTRG. 51755. 1 |              | XLOC_055502 | 307 coding  | coding    | noncoding | noncoding |
| MSTRG. 51756. 1 |              | XLOC_055503 | 309 coding  | noncoding | noncoding | noncoding |
| MSTRG. 51800. 1 |              | XLOC_055520 | 275 coding  | noncoding | noncoding | noncoding |
| XR_001740953. 1 | LOC105374145 | XLOC_055524 | 7278 coding | noncoding | noncoding | noncoding |
| XM_017006629. 1 | PLSCR1       | XLOC_055538 | 2272 coding | coding    | noncoding | coding    |
| MSTRG. 51923. 1 | ZIC1         | XLOC_055557 | 266 coding  | noncoding | noncoding | noncoding |
| MSTRG. 52024. 1 | HLTF-AS1     | XLOC_055604 | 280 coding  | noncoding | noncoding | noncoding |
| MSTRG. 52027. 1 |              | XLOC_055608 | 251 coding  | noncoding | noncoding | noncoding |
| MSTRG. 52029. 1 |              | XLOC_055610 | 286 coding  | noncoding | noncoding | noncoding |
| MSTRG. 52089. 1 |              | XLOC_055638 | 238 coding  | noncoding | noncoding | noncoding |
| NM_005067. 7    | SIAH2        | XLOC_055668 | 2311 coding | coding    | coding    | coding    |
| MSTRG. 52227. 1 |              | XLOC_055670 | 209 coding  | noncoding | noncoding | noncoding |
| MSTRG. 52228. 1 |              | XLOC_055671 | 356 coding  | noncoding | noncoding | noncoding |
| NM_001256819. 2 | CLRN1        | XLOC_055685 | 2259 coding | noncoding | coding    | coding    |
| MSTRG. 52267. 1 | MED12L       | XLOC_055700 | 260 coding  | noncoding | noncoding | noncoding |
| XM_005247922. 3 | P2RY14       | XLOC_055702 | 2469 coding | coding    | coding    | coding    |
| XM_011513340. 3 | P2RY14       | XLOC_055702 | 3107 coding | coding    | coding    | coding    |
| MSTRG. 52284. 1 | MED12L       | XLOC_055710 | 356 coding  | coding    | noncoding | noncoding |
| MSTRG. 52287. 1 | P2RY13       | XLOC_055712 | 2315 coding | coding    | coding    | coding    |
| MSTRG. 52295. 1 | MED12L       | XLOC_055717 | 389 coding  | noncoding | noncoding | noncoding |
| MSTRG. 52313. 1 | IGSF10       | XLOC_055725 | 254 coding  | noncoding | noncoding | noncoding |

|                  |              |             |              |           |           |           |
|------------------|--------------|-------------|--------------|-----------|-----------|-----------|
| MSTRG. 52316. 1  | IGSF10       | XLOC_055726 | 233 coding   | noncoding | noncoding | noncoding |
| MSTRG. 52322. 1  | IGSF10       | XLOC_055728 | 245 coding   | noncoding | noncoding | noncoding |
| MSTRG. 52762. 26 | TMEM14EP     | XLOC_055746 | 15069 coding | coding    | noncoding | noncoding |
| MSTRG. 52336. 1  |              | XLOC_055752 | 248 coding   | noncoding | noncoding | noncoding |
| MSTRG. 52345. 1  |              | XLOC_055758 | 233 coding   | noncoding | noncoding | noncoding |
| MSTRG. 52350. 1  |              | XLOC_055761 | 288 coding   | noncoding | noncoding | noncoding |
| MSTRG. 52362. 1  |              | XLOC_055766 | 276 coding   | noncoding | noncoding | noncoding |
| MSTRG. 52364. 1  |              | XLOC_055768 | 271 coding   | noncoding | noncoding | noncoding |
| MSTRG. 52469. 1  | LINC02006    | XLOC_055785 | 244 coding   | noncoding | noncoding | noncoding |
| MSTRG. 52474. 1  | C3orf79      | XLOC_055787 | 308 coding   | noncoding | noncoding | noncoding |
| MSTRG. 52515. 1  | ARHGEF26-AS1 | XLOC_055797 | 268 coding   | noncoding | noncoding | noncoding |
| NM_001038705. 3  | GPR149       | XLOC_055810 | 5527 coding  | noncoding | coding    | coding    |
| MSTRG. 52498. 1  |              | XLOC_055815 | 287 coding   | noncoding | noncoding | noncoding |
| MSTRG. 52501. 1  |              | XLOC_055817 | 217 coding   | noncoding | noncoding | noncoding |
| XM_011512562. 3  | PLCH1        | XLOC_055843 | 7254 coding  | coding    | coding    | coding    |
| MSTRG. 52641. 1  | PLCH1        | XLOC_055844 | 276 coding   | noncoding | noncoding | noncoding |
| MSTRG. 52653. 1  | PLCH1        | XLOC_055847 | 234 coding   | noncoding | noncoding | noncoding |
| MSTRG. 52656. 1  |              | XLOC_055854 | 278 coding   | noncoding | noncoding | noncoding |
| MSTRG. 52666. 1  |              | XLOC_055862 | 300 coding   | noncoding | noncoding | noncoding |
| MSTRG. 52704. 1  | SSR3         | XLOC_055881 | 266 coding   | noncoding | noncoding | noncoding |
| MSTRG. 52841. 1  | LEKR1        | XLOC_055904 | 448 coding   | noncoding | noncoding | noncoding |
| MSTRG. 53070. 1  | IQCJ         | XLOC_056021 | 387 coding   | noncoding | noncoding | noncoding |
| MSTRG. 53091. 1  | SCHIP1       | XLOC_056034 | 320 coding   | coding    | noncoding | noncoding |
| MSTRG. 53098. 1  | SCHIP1       | XLOC_056040 | 244 coding   | noncoding | noncoding | noncoding |
| MSTRG. 53100. 1  | SCHIP1       | XLOC_056041 | 321 coding   | noncoding | noncoding | noncoding |
| MSTRG. 53121. 1  |              | XLOC_056091 | 294 coding   | noncoding | noncoding | noncoding |
| MSTRG. 53145. 1  |              | XLOC_056093 | 293 coding   | noncoding | noncoding | noncoding |
| MSTRG. 53218. 1  |              | XLOC_056122 | 322 coding   | noncoding | noncoding | noncoding |
| MSTRG. 53223. 1  |              | XLOC_056123 | 269 coding   | noncoding | noncoding | noncoding |
| MSTRG. 53226. 1  |              | XLOC_056125 | 614 coding   | noncoding | noncoding | noncoding |
| MSTRG. 53227. 1  |              | XLOC_056126 | 258 coding   | noncoding | noncoding | noncoding |
| MSTRG. 53254. 1  | LINC01192    | XLOC_056140 | 274 coding   | coding    | noncoding | noncoding |
| MSTRG. 53259. 1  | LOC105374188 | XLOC_056142 | 291 coding   | noncoding | noncoding | noncoding |
| MSTRG. 53269. 1  |              | XLOC_056149 | 309 coding   | noncoding | noncoding | noncoding |
| MSTRG. 53293. 1  |              | XLOC_056162 | 309 coding   | coding    | noncoding | noncoding |
| MSTRG. 53296. 1  | LOC105374189 | XLOC_056163 | 253 coding   | noncoding | noncoding | noncoding |
| MSTRG. 53326. 1  |              | XLOC_056184 | 248 coding   | noncoding | noncoding | noncoding |
| MSTRG. 53327. 1  |              | XLOC_056185 | 324 coding   | noncoding | noncoding | noncoding |
| MSTRG. 53352. 1  |              | XLOC_056196 | 272 coding   | noncoding | noncoding | noncoding |
| MSTRG. 53359. 1  |              | XLOC_056202 | 470 coding   | noncoding | noncoding | noncoding |
| MSTRG. 53367. 1  |              | XLOC_056207 | 229 coding   | noncoding | noncoding | noncoding |
| MSTRG. 53370. 1  |              | XLOC_056208 | 313 coding   | noncoding | noncoding | noncoding |
| MSTRG. 53378. 1  |              | XLOC_056209 | 236 coding   | noncoding | noncoding | noncoding |

|                  |              |             |              |           |           |           |
|------------------|--------------|-------------|--------------|-----------|-----------|-----------|
| MSTRG. 53380. 1  |              | XLOC_056210 | 231 coding   | noncoding | noncoding | noncoding |
| MSTRG. 53466. 1  | WDR49        | XLOC_056232 | 528 coding   | noncoding | noncoding | noncoding |
| MSTRG. 53484. 1  | WDR49        | XLOC_056238 | 302 coding   | noncoding | noncoding | noncoding |
| MSTRG. 53496. 1  | WDR49        | XLOC_056242 | 497 coding   | noncoding | noncoding | noncoding |
| MSTRG. 53504. 1  | LRRC77P      | XLOC_056277 | 371 coding   | noncoding | noncoding | noncoding |
| MSTRG. 53506. 1  |              | XLOC_056286 | 292 coding   | noncoding | noncoding | noncoding |
| XR_001741014. 1  | LOC105374200 | XLOC_056296 | 11183 coding | noncoding | noncoding | noncoding |
| MSTRG. 53613. 1  | MECOM        | XLOC_056304 | 257 coding   | noncoding | noncoding | noncoding |
| MSTRG. 53624. 1  | MECOM        | XLOC_056308 | 307 coding   | coding    | noncoding | noncoding |
| MSTRG. 53602. 1  |              | XLOC_056314 | 232 coding   | noncoding | noncoding | noncoding |
| MSTRG. 53656. 8  | LOC100128164 | XLOC_056323 | 4667 coding  | coding    | noncoding | noncoding |
| MSTRG. 53644. 1  |              | XLOC_056325 | 306 coding   | noncoding | noncoding | noncoding |
| MSTRG. 53667. 1  |              | XLOC_056330 | 236 coding   | noncoding | noncoding | noncoding |
| NM_020949. 3     | SLC7A14      | XLOC_056331 | 10140 coding | coding    | coding    | coding    |
| MSTRG. 53686. 1  | SLC7A14-AS1  | XLOC_056334 | 272 coding   | noncoding | noncoding | noncoding |
| MSTRG. 53675. 1  | LOC105374211 | XLOC_056338 | 265 coding   | noncoding | noncoding | noncoding |
| MSTRG. 53716. 1  |              | XLOC_056342 | 363 coding   | noncoding | noncoding | noncoding |
| MSTRG. 53922. 8  | FNDC3B       | XLOC_056415 | 1585 coding  | coding    | noncoding | noncoding |
| MSTRG. 53760. 1  |              | XLOC_056420 | 281 coding   | noncoding | noncoding | noncoding |
| MSTRG. 53874. 1  | SPATA16      | XLOC_056458 | 519 coding   | noncoding | noncoding | noncoding |
| MSTRG. 53908. 1  | NLGN1        | XLOC_056472 | 378 coding   | noncoding | noncoding | noncoding |
| MSTRG. 54054. 1  | NAALADL2     | XLOC_056510 | 238 coding   | noncoding | noncoding | noncoding |
| MSTRG. 53982. 1  |              | XLOC_056533 | 760 coding   | coding    | noncoding | noncoding |
| MSTRG. 53987. 1  |              | XLOC_056536 | 273 coding   | noncoding | noncoding | noncoding |
| MSTRG. 53988. 1  |              | XLOC_056537 | 240 coding   | noncoding | noncoding | noncoding |
| MSTRG. 54068. 1  |              | XLOC_056544 | 286 coding   | noncoding | noncoding | noncoding |
| MSTRG. 54069. 1  |              | XLOC_056545 | 276 coding   | noncoding | noncoding | noncoding |
| MSTRG. 54103. 1  | LINC00578    | XLOC_056554 | 293 coding   | noncoding | noncoding | noncoding |
| MSTRG. 54115. 1  | LINC00578    | XLOC_056560 | 265 coding   | noncoding | noncoding | noncoding |
| MSTRG. 54096. 1  | LINC02015    | XLOC_056570 | 284 coding   | noncoding | noncoding | noncoding |
| XR_924740. 2     | LOC105374235 | XLOC_056616 | 11782 coding | coding    | coding    | noncoding |
| NR_126560. 1     | KCNMB2-AS1   | XLOC_056620 | 2055 coding  | noncoding | noncoding | noncoding |
| MSTRG. 54177. 1  |              | XLOC_056625 | 257 coding   | noncoding | noncoding | noncoding |
| MSTRG. 54201. 1  |              | XLOC_056626 | 200 coding   | noncoding | noncoding | noncoding |
| XM_011513073. 2  | ZMAT3        | XLOC_056633 | 9005 coding  | coding    | coding    | coding    |
| MSTRG. 54321. 1  |              | XLOC_056679 | 275 coding   | noncoding | noncoding | noncoding |
| MSTRG. 54328. 1  |              | XLOC_056683 | 281 coding   | noncoding | noncoding | noncoding |
| MSTRG. 54333. 1  |              | XLOC_056685 | 258 coding   | noncoding | noncoding | noncoding |
| MSTRG. 54354. 1  | LOC101928882 | XLOC_056693 | 298 coding   | noncoding | noncoding | noncoding |
| MSTRG. 54355. 1  | LOC101928882 | XLOC_056694 | 242 coding   | noncoding | noncoding | noncoding |
| MSTRG. 54373. 11 | FXR1         | XLOC_056698 | 2298 coding  | coding    | noncoding | noncoding |
| MSTRG. 54431. 1  | SOX2-OT      | XLOC_056702 | 275 coding   | noncoding | noncoding | noncoding |
| MSTRG. 54472. 1  | SOX2-OT      | XLOC_056733 | 258 coding   | noncoding | noncoding | noncoding |

|                  |                |             |             |           |           |           |
|------------------|----------------|-------------|-------------|-----------|-----------|-----------|
| MSTRG. 54390. 1  |                | XLOC_056741 | 264 coding  | noncoding | noncoding | noncoding |
| MSTRG. 54402. 1  |                | XLOC_056747 | 222 coding  | noncoding | noncoding | noncoding |
| MSTRG. 54424. 1  | LINC01994      | XLOC_056761 | 275 coding  | noncoding | noncoding | noncoding |
| MSTRG. 54496. 1  |                | XLOC_056767 | 257 coding  | noncoding | noncoding | noncoding |
| MSTRG. 54519. 1  | LOC105374245   | XLOC_056772 | 249 coding  | noncoding | noncoding | noncoding |
| MSTRG. 54512. 1  | LAMP3          | XLOC_056787 | 249 coding  | noncoding | noncoding | noncoding |
| MSTRG. 54515. 1  | LAMP3          | XLOC_056788 | 234 coding  | noncoding | noncoding | noncoding |
| MSTRG. 54508. 1  |                | XLOC_056790 | 218 coding  | noncoding | noncoding | noncoding |
| XM_011513274. 3  | KLHL6          | XLOC_056796 | 2635 coding | coding    | coding    | coding    |
| MSTRG. 54568. 1  |                | XLOC_056802 | 294 coding  | noncoding | noncoding | noncoding |
| MSTRG. 54602. 1  |                | XLOC_056805 | 286 coding  | noncoding | noncoding | noncoding |
| XM_024453628. 1  | PARL           | XLOC_056809 | 1515 coding | coding    | coding    | coding    |
| MSTRG. 54625. 18 | PARL           | XLOC_056809 | 530 coding  | noncoding | noncoding | noncoding |
| MSTRG. 54653. 1  | ABCC5          | XLOC_056817 | 266 coding  | noncoding | noncoding | noncoding |
| MSTRG. 54633. 1  |                | XLOC_056818 | 272 coding  | noncoding | noncoding | noncoding |
| MSTRG. 54644. 1  | LOC105374249   | XLOC_056824 | 228 coding  | noncoding | noncoding | noncoding |
| MSTRG. 54669. 1  | EEF1AKMT4-ECE2 | XLOC_056834 | 228 coding  | noncoding | noncoding | noncoding |
| MSTRG. 54706. 1  | CLCN2          | XLOC_056840 | 262 coding  | noncoding | noncoding | noncoding |
| MSTRG. 54675. 1  | LINC02054      | XLOC_056844 | 514 coding  | noncoding | noncoding | noncoding |
| MSTRG. 54681. 1  |                | XLOC_056848 | 271 coding  | noncoding | noncoding | noncoding |
| MSTRG. 54720. 1  | EHHADH-AS1     | XLOC_056863 | 306 coding  | noncoding | noncoding | noncoding |
| MSTRG. 54753. 1  | MAP3K13        | XLOC_056879 | 293 coding  | coding    | coding    | noncoding |
| MSTRG. 54760. 1  | MAP3K13        | XLOC_056884 | 288 coding  | noncoding | noncoding | noncoding |
| MSTRG. 54729. 1  |                | XLOC_056891 | 281 coding  | noncoding | noncoding | noncoding |
| MSTRG. 54736. 1  |                | XLOC_056893 | 324 coding  | noncoding | noncoding | noncoding |
| XM_017005563. 1  | IGF2BP2        | XLOC_056895 | 2383 coding | coding    | coding    | coding    |
| MSTRG. 54786. 1  | IGF2BP2        | XLOC_056900 | 300 coding  | noncoding | noncoding | noncoding |
| MSTRG. 54779. 1  |                | XLOC_056906 | 450 coding  | noncoding | noncoding | noncoding |
| MSTRG. 54797. 1  |                | XLOC_056917 | 270 coding  | noncoding | noncoding | noncoding |
| MSTRG. 54856. 1  | DGKG           | XLOC_056924 | 246 coding  | noncoding | noncoding | noncoding |
| MSTRG. 54815. 1  |                | XLOC_056938 | 274 coding  | noncoding | noncoding | noncoding |
| MSTRG. 54822. 1  | AHSG           | XLOC_056949 | 519 coding  | noncoding | noncoding | noncoding |
| MSTRG. 54830. 1  | LOC105374258   | XLOC_056951 | 216 coding  | coding    | noncoding | noncoding |
| MSTRG. 54833. 1  | KNG1           | XLOC_056952 | 249 coding  | noncoding | noncoding | noncoding |
| XM_017006870. 2  | MASP1          | XLOC_056966 | 4373 coding | coding    | coding    | coding    |
| MSTRG. 54982. 1  |                | XLOC_056971 | 314 coding  | noncoding | noncoding | noncoding |
| MSTRG. 55007. 1  |                | XLOC_056981 | 306 coding  | noncoding | noncoding | noncoding |
| MSTRG. 55051. 1  | LOC107986166   | XLOC_057024 | 404 coding  | noncoding | noncoding | noncoding |
| MSTRG. 55078. 1  |                | XLOC_057043 | 316 coding  | noncoding | noncoding | noncoding |
| MSTRG. 55160. 1  | P3H2           | XLOC_057128 | 271 coding  | noncoding | noncoding | noncoding |
| MSTRG. 55132. 1  |                | XLOC_057131 | 274 coding  | noncoding | noncoding | noncoding |
| MSTRG. 55135. 1  |                | XLOC_057132 | 261 coding  | noncoding | noncoding | noncoding |
| NM_021101. 5     | CLDN1          | XLOC_057134 | 3446 coding | coding    | coding    | coding    |

|                  |              |             |             |           |           |           |
|------------------|--------------|-------------|-------------|-----------|-----------|-----------|
| MSTRG. 55244. 1  |              | XLOC_057149 | 267 coding  | noncoding | noncoding | noncoding |
| MSTRG. 55260. 1  |              | XLOC_057155 | 394 coding  | coding    | noncoding | noncoding |
| MSTRG. 55300. 1  |              | XLOC_057168 | 267 coding  | noncoding | noncoding | noncoding |
| MSTRG. 55303. 1  |              | XLOC_057171 | 249 coding  | noncoding | noncoding | noncoding |
| MSTRG. 55316. 1  |              | XLOC_057176 | 313 coding  | noncoding | noncoding | noncoding |
| MSTRG. 55319. 1  |              | XLOC_057177 | 315 coding  | noncoding | noncoding | noncoding |
| NM_021032. 4     | FGF12        | XLOC_057182 | 6174 coding | coding    | coding    | coding    |
| MSTRG. 55362. 1  | FGF12        | XLOC_057185 | 396 coding  | noncoding | noncoding | noncoding |
| MSTRG. 55367. 1  | FGF12        | XLOC_057187 | 351 coding  | noncoding | noncoding | noncoding |
| MSTRG. 55377. 1  | FGF12        | XLOC_057192 | 291 coding  | noncoding | noncoding | noncoding |
| MSTRG. 55379. 1  | FGF12        | XLOC_057193 | 302 coding  | noncoding | noncoding | noncoding |
| MSTRG. 55386. 1  |              | XLOC_057206 | 280 coding  | noncoding | noncoding | noncoding |
| MSTRG. 55397. 1  |              | XLOC_057211 | 273 coding  | noncoding | noncoding | noncoding |
| MSTRG. 55399. 1  |              | XLOC_057212 | 296 coding  | noncoding | noncoding | noncoding |
| MSTRG. 55480. 1  | ATP13A4      | XLOC_057219 | 255 coding  | noncoding | noncoding | noncoding |
| MSTRG. 55494. 1  | ATP13A4      | XLOC_057222 | 611 coding  | noncoding | noncoding | noncoding |
| MSTRG. 55499. 1  | ATP13A4      | XLOC_057225 | 435 coding  | noncoding | noncoding | noncoding |
| MSTRG. 55506. 15 | OPA1         | XLOC_057227 | 3944 coding | noncoding | noncoding | noncoding |
| NR_027764. 1     | DPPA2P3      | XLOC_057244 | 1146 coding | coding    | noncoding | noncoding |
| MSTRG. 55454. 1  | LINC02028    | XLOC_057251 | 223 coding  | noncoding | noncoding | noncoding |
| XR_001740368. 1  | TMEM44       | XLOC_057278 | 4775 coding | noncoding | coding    | coding    |
| XM_017006796. 1  | LSG1         | XLOC_057279 | 2900 coding | coding    | coding    | coding    |
| MSTRG. 55561. 1  | LOC105374292 | XLOC_057290 | 267 coding  | noncoding | noncoding | noncoding |
| MSTRG. 55571. 1  |              | XLOC_057298 | 220 coding  | noncoding | noncoding | noncoding |
| MSTRG. 55617. 1  | XXYLT1       | XLOC_057317 | 237 coding  | noncoding | noncoding | noncoding |
| MSTRG. 55620. 1  | XXYLT1       | XLOC_057320 | 211 coding  | noncoding | noncoding | noncoding |
| MSTRG. 55640. 1  | ACAP2        | XLOC_057335 | 238 coding  | noncoding | noncoding | noncoding |
| MSTRG. 55622. 1  |              | XLOC_057350 | 276 coding  | noncoding | noncoding | noncoding |
| NM_001316325. 2  | PPP1R2       | XLOC_057352 | 3531 coding | coding    | coding    | coding    |
| XM_011512317. 3  | TNK2         | XLOC_057361 | 4887 coding | coding    | coding    | coding    |
| MSTRG. 55683. 1  |              | XLOC_057366 | 226 coding  | noncoding | noncoding | noncoding |
| MSTRG. 55727. 1  | TFRC         | XLOC_057372 | 369 coding  | noncoding | noncoding | noncoding |
| MSTRG. 55721. 1  | LINC00885    | XLOC_057374 | 239 coding  | noncoding | noncoding | noncoding |
| MSTRG. 55752. 1  | UBXN7        | XLOC_057385 | 256 coding  | noncoding | noncoding | noncoding |
| MSTRG. 55932. 7  | PIGX         | XLOC_057408 | 860 coding  | coding    | noncoding | noncoding |
| MSTRG. 55775. 1  |              | XLOC_057415 | 285 coding  | noncoding | noncoding | noncoding |
| MSTRG. 55904. 1  |              | XLOC_057419 | 309 coding  | noncoding | noncoding | noncoding |
| MSTRG. 55960. 1  |              | XLOC_057449 | 514 coding  | noncoding | noncoding | noncoding |
| MSTRG. 55967. 1  |              | XLOC_057453 | 219 coding  | noncoding | noncoding | noncoding |
| MSTRG. 55985. 1  |              | XLOC_057458 | 755 coding  | noncoding | noncoding | noncoding |
| MSTRG. 55986. 1  |              | XLOC_057459 | 229 coding  | noncoding | noncoding | noncoding |
| MSTRG. 55989. 1  |              | XLOC_057460 | 264 coding  | noncoding | noncoding | noncoding |
| MSTRG. 56042. 11 | FAM157A      | XLOC_057488 | 1509 coding | noncoding | noncoding | noncoding |

|                  |              |             |             |           |           |           |
|------------------|--------------|-------------|-------------|-----------|-----------|-----------|
| MSTRG. 56042. 22 | FAM157A      | XLOC_057488 | 555 coding  | noncoding | noncoding | noncoding |
| MSTRG. 56044. 1  |              | XLOC_057489 | 399 coding  | noncoding | noncoding | noncoding |
| MSTRG. 56103. 1  | ZNF141       | XLOC_057510 | 267 coding  | noncoding | noncoding | noncoding |
| MSTRG. 56163. 1  | ZNF721       | XLOC_057526 | 581 coding  | noncoding | noncoding | noncoding |
| MSTRG. 56139. 1  |              | XLOC_057534 | 329 coding  | coding    | noncoding | noncoding |
| MSTRG. 56253. 1  | TMEM175      | XLOC_057558 | 258 coding  | noncoding | noncoding | noncoding |
| XR_924947. 1     | IDUA         | XLOC_057566 | 2222 coding | coding    | coding    | coding    |
| MSTRG. 56261. 1  |              | XLOC_057594 | 215 coding  | noncoding | noncoding | noncoding |
| XR_001741093. 1  | MAEA         | XLOC_057596 | 2158 coding | coding    | coding    | coding    |
| XR_001741298. 1  | UVSSA        | XLOC_057599 | 3621 coding | coding    | coding    | coding    |
| MSTRG. 56302. 1  | FAM53A       | XLOC_057604 | 237 coding  | noncoding | noncoding | noncoding |
| MSTRG. 56306. 1  |              | XLOC_057611 | 249 coding  | noncoding | noncoding | noncoding |
| MSTRG. 56371. 1  | NSD2         | XLOC_057619 | 242 coding  | noncoding | noncoding | noncoding |
| MSTRG. 56372. 1  | NSD2         | XLOC_057620 | 235 coding  | noncoding | noncoding | noncoding |
| MSTRG. 56360. 1  | POLN         | XLOC_057636 | 247 coding  | noncoding | noncoding | noncoding |
| MSTRG. 56362. 2  | POLN         | XLOC_057638 | 326 coding  | noncoding | noncoding | noncoding |
| MSTRG. 56441. 1  | CFAP99       | XLOC_057676 | 333 coding  | noncoding | noncoding | noncoding |
| MSTRG. 56447. 1  | RNF4         | XLOC_057679 | 200 coding  | noncoding | noncoding | noncoding |
| MSTRG. 56448. 1  |              | XLOC_057680 | 279 coding  | noncoding | noncoding | noncoding |
| MSTRG. 56451. 1  | FAM193A      | XLOC_057683 | 266 coding  | noncoding | noncoding | noncoding |
| NM_001354758. 1  | ADD1         | XLOC_057695 | 4086 coding | coding    | coding    | coding    |
| XM_005247934. 2  | ADD1         | XLOC_057695 | 4216 coding | coding    | coding    | coding    |
| MSTRG. 56502. 1  | GRK4         | XLOC_057705 | 265 coding  | coding    | noncoding | noncoding |
| MSTRG. 56563. 1  | HTT          | XLOC_057709 | 287 coding  | noncoding | noncoding | noncoding |
| MSTRG. 56564. 1  | HTT          | XLOC_057710 | 282 coding  | noncoding | noncoding | noncoding |
| MSTRG. 56471. 1  |              | XLOC_057721 | 240 coding  | noncoding | noncoding | noncoding |
| MSTRG. 56473. 1  |              | XLOC_057733 | 279 coding  | noncoding | noncoding | noncoding |
| MSTRG. 56557. 1  |              | XLOC_057750 | 207 coding  | noncoding | noncoding | noncoding |
| MSTRG. 56620. 1  | ZBTB49       | XLOC_057780 | 261 coding  | noncoding | noncoding | noncoding |
| MSTRG. 56606. 1  |              | XLOC_057783 | 278 coding  | noncoding | noncoding | noncoding |
| MSTRG. 56609. 1  |              | XLOC_057784 | 323 coding  | noncoding | noncoding | noncoding |
| MSTRG. 56607. 1  |              | XLOC_057785 | 225 coding  | noncoding | noncoding | noncoding |
| MSTRG. 56610. 1  | LOC112268462 | XLOC_057787 | 239 coding  | noncoding | noncoding | noncoding |
| MSTRG. 56643. 1  |              | XLOC_057810 | 269 coding  | noncoding | noncoding | noncoding |
| MSTRG. 56644. 1  |              | XLOC_057812 | 250 coding  | noncoding | noncoding | noncoding |
| MSTRG. 56667. 1  | STK32B       | XLOC_057819 | 240 coding  | noncoding | noncoding | noncoding |
| MSTRG. 56674. 1  | STK32B       | XLOC_057823 | 211 coding  | noncoding | noncoding | noncoding |
| MSTRG. 56682. 1  | STK32B       | XLOC_057826 | 277 coding  | noncoding | noncoding | noncoding |
| MSTRG. 56708. 5  | EVC          | XLOC_057845 | 7022 coding | noncoding | coding    | coding    |
| MSTRG. 56717. 1  | CRMP1        | XLOC_057848 | 286 coding  | noncoding | noncoding | noncoding |
| MSTRG. 56725. 1  | C4orf50      | XLOC_057852 | 368 coding  | coding    | noncoding | noncoding |
| MSTRG. 56768. 2  | JAKMIP1      | XLOC_057856 | 256 coding  | coding    | noncoding | noncoding |
| MSTRG. 56728. 1  |              | XLOC_057866 | 250 coding  | noncoding | noncoding | noncoding |

|                |              |             |              |           |           |           |
|----------------|--------------|-------------|--------------|-----------|-----------|-----------|
| NM_006005.3    | WFS1         | XLOC_057867 | 3640 coding  | noncoding | coding    | coding    |
| MSTRG.56741.1  | PPP2R2C      | XLOC_057872 | 234 coding   | noncoding | noncoding | noncoding |
| MSTRG.56756.1  | PPP2R2C      | XLOC_057879 | 276 coding   | noncoding | noncoding | noncoding |
| MSTRG.56792.1  | MAN2B2       | XLOC_057885 | 248 coding   | noncoding | noncoding | noncoding |
| NR_158178.1    | LOC93622     | XLOC_057888 | 1618 coding  | coding    | coding    | noncoding |
| MSTRG.56952.1  | TBC1D14      | XLOC_057925 | 417 coding   | noncoding | noncoding | noncoding |
| MSTRG.56942.1  | LINC02447    | XLOC_057944 | 276 coding   | noncoding | noncoding | noncoding |
| MSTRG.56931.1  |              | XLOC_057945 | 261 coding   | noncoding | noncoding | noncoding |
| MSTRG.56933.1  |              | XLOC_057946 | 281 coding   | noncoding | noncoding | noncoding |
| XM_017008481.1 | SORCS2       | XLOC_057948 | 5032 coding  | coding    | coding    | coding    |
| MSTRG.57085.1  |              | XLOC_058036 | 330 coding   | noncoding | noncoding | noncoding |
| MSTRG.57116.1  | LOC105369250 | XLOC_058056 | 263 coding   | coding    | noncoding | noncoding |
| MSTRG.57123.1  | LOC105369250 | XLOC_058062 | 374 coding   | noncoding | noncoding | noncoding |
| NM_001358418.1 | FAM90A26     | XLOC_058066 | 1395 coding  | coding    | coding    | coding    |
| NM_001256854.1 | USP17L11     | XLOC_058069 | 1593 coding  | coding    | coding    | coding    |
| NM_001256853.1 | USP17L12     | XLOC_058070 | 1593 coding  | coding    | coding    | coding    |
| NM_001256859.1 | USP17L18     | XLOC_058074 | 1593 coding  | coding    | coding    | coding    |
| NM_001256861.1 | USP17L20     | XLOC_058076 | 1593 coding  | coding    | coding    | coding    |
| NM_001256863.1 | USP17L22     | XLOC_058078 | 1593 coding  | coding    | coding    | coding    |
| MSTRG.57165.1  |              | XLOC_058090 | 280 coding   | noncoding | noncoding | noncoding |
| MSTRG.57193.1  |              | XLOC_058096 | 251 coding   | coding    | coding    | noncoding |
| MSTRG.57195.1  |              | XLOC_058097 | 244 coding   | noncoding | noncoding | noncoding |
| MSTRG.57173.1  |              | XLOC_058100 | 240 coding   | noncoding | noncoding | noncoding |
| MSTRG.57257.1  |              | XLOC_058156 | 255 coding   | noncoding | noncoding | noncoding |
| MSTRG.57451.1  | LINC02360    | XLOC_058183 | 308 coding   | noncoding | noncoding | noncoding |
| MSTRG.57406.1  | LOC105374483 | XLOC_058186 | 200 coding   | noncoding | noncoding | noncoding |
| MSTRG.57465.1  |              | XLOC_058203 | 297 coding   | noncoding | noncoding | noncoding |
| MSTRG.57615.1  | LOC105374493 | XLOC_058220 | 291 coding   | noncoding | coding    | noncoding |
| MSTRG.57489.1  |              | XLOC_058288 | 254 coding   | noncoding | noncoding | noncoding |
| MSTRG.57532.11 | BOD1L1       | XLOC_058291 | 12656 coding | coding    | coding    | coding    |
| MSTRG.57503.1  | LOC107986183 | XLOC_058297 | 236 coding   | noncoding | noncoding | noncoding |
| MSTRG.57506.1  | LOC107986184 | XLOC_058298 | 273 coding   | noncoding | noncoding | noncoding |
| MSTRG.57524.1  | LOC107986182 | XLOC_058309 | 227 coding   | noncoding | noncoding | noncoding |
| MSTRG.57536.1  |              | XLOC_058321 | 307 coding   | noncoding | noncoding | noncoding |
| MSTRG.57537.1  |              | XLOC_058322 | 271 coding   | coding    | noncoding | noncoding |
| MSTRG.57597.1  | LINC00504    | XLOC_058346 | 221 coding   | noncoding | noncoding | noncoding |
| MSTRG.58509.1  | LOC101929095 | XLOC_058382 | 283 coding   | noncoding | noncoding | noncoding |
| MSTRG.58562.1  | LOC101929095 | XLOC_058427 | 321 coding   | noncoding | noncoding | noncoding |
| MSTRG.58584.5  | CC2D2A       | XLOC_058437 | 12087 coding | coding    | coding    | coding    |
| MSTRG.58617.1  | BST1         | XLOC_058443 | 245 coding   | noncoding | noncoding | noncoding |
| MSTRG.57738.1  | PROM1        | XLOC_058460 | 307 coding   | noncoding | noncoding | noncoding |
| MSTRG.57739.1  |              | XLOC_058478 | 279 coding   | noncoding | noncoding | noncoding |
| MSTRG.57743.1  |              | XLOC_058520 | 264 coding   | noncoding | noncoding | noncoding |

|                 |              |             |             |           |           |           |
|-----------------|--------------|-------------|-------------|-----------|-----------|-----------|
| MSTRG. 57746. 1 |              | XLOC_058521 | 239 coding  | noncoding | noncoding | noncoding |
| MSTRG. 57782. 1 |              | XLOC_058524 | 294 coding  | noncoding | noncoding | noncoding |
| MSTRG. 57891. 1 | FAM184B      | XLOC_058551 | 276 coding  | noncoding | noncoding | noncoding |
| MSTRG. 57905. 1 |              | XLOC_058564 | 265 coding  | coding    | noncoding | noncoding |
| MSTRG. 57943. 1 | LOC105374510 | XLOC_058578 | 317 coding  | noncoding | noncoding | noncoding |
| MSTRG. 57974. 1 | LINC02438    | XLOC_058593 | 230 coding  | noncoding | noncoding | noncoding |
| MSTRG. 57994. 1 |              | XLOC_058604 | 298 coding  | noncoding | noncoding | noncoding |
| MSTRG. 57997. 1 |              | XLOC_058606 | 287 coding  | noncoding | noncoding | noncoding |
| MSTRG. 58009. 1 | SLIT2        | XLOC_058610 | 274 coding  | noncoding | noncoding | noncoding |
| MSTRG. 58011. 1 | SLIT2        | XLOC_058612 | 312 coding  | noncoding | noncoding | noncoding |
| MSTRG. 58013. 1 | SLIT2        | XLOC_058613 | 229 coding  | noncoding | noncoding | noncoding |
| MSTRG. 58022. 1 | SLIT2        | XLOC_058620 | 231 coding  | noncoding | noncoding | noncoding |
| MSTRG. 58023. 1 | SLIT2        | XLOC_058621 | 284 coding  | noncoding | noncoding | noncoding |
| MSTRG. 58179. 1 | KCNIP4       | XLOC_058630 | 235 coding  | noncoding | noncoding | noncoding |
| MSTRG. 58182. 1 | KCNIP4       | XLOC_058633 | 214 coding  | noncoding | noncoding | noncoding |
| MSTRG. 58199. 1 | KCNIP4       | XLOC_058644 | 265 coding  | noncoding | noncoding | noncoding |
| MSTRG. 58200. 1 | KCNIP4       | XLOC_058645 | 313 coding  | noncoding | noncoding | noncoding |
| MSTRG. 58211. 1 | KCNIP4       | XLOC_058652 | 217 coding  | noncoding | noncoding | noncoding |
| MSTRG. 58063. 1 |              | XLOC_058655 | 260 coding  | noncoding | noncoding | noncoding |
| MSTRG. 58073. 1 |              | XLOC_058660 | 289 coding  | noncoding | noncoding | noncoding |
| MSTRG. 58100. 1 | ADGRA3       | XLOC_058667 | 295 coding  | noncoding | noncoding | noncoding |
| MSTRG. 58092. 1 |              | XLOC_058675 | 242 coding  | noncoding | noncoding | noncoding |
| MSTRG. 58151. 1 | LOC105374523 | XLOC_058691 | 263 coding  | noncoding | noncoding | noncoding |
| MSTRG. 58130. 1 |              | XLOC_058694 | 285 coding  | noncoding | noncoding | noncoding |
| MSTRG. 58229. 1 | PPARGC1A     | XLOC_058706 | 316 coding  | noncoding | noncoding | noncoding |
| MSTRG. 58328. 1 | LOC102723675 | XLOC_058769 | 279 coding  | noncoding | noncoding | noncoding |
| MSTRG. 58375. 1 | PI4K2B       | XLOC_058795 | 268 coding  | noncoding | noncoding | noncoding |
| MSTRG. 58388. 1 |              | XLOC_058814 | 387 coding  | noncoding | coding    | noncoding |
| MSTRG. 58395. 1 | LOC101929161 | XLOC_058817 | 260 coding  | noncoding | noncoding | noncoding |
| MSTRG. 58396. 1 |              | XLOC_058818 | 302 coding  | noncoding | noncoding | noncoding |
| MSTRG. 58399. 1 |              | XLOC_058823 | 259 coding  | noncoding | noncoding | noncoding |
| XM_017008174. 2 | RBPJ         | XLOC_058839 | 1987 coding | coding    | coding    | coding    |
| XM_017008363. 1 | TBC1D19      | XLOC_058856 | 1831 coding | coding    | noncoding | coding    |
| MSTRG. 58982. 1 | TBC1D19      | XLOC_058859 | 303 coding  | noncoding | noncoding | noncoding |
| MSTRG. 58631. 1 |              | XLOC_058906 | 246 coding  | noncoding | noncoding | noncoding |
| MSTRG. 58632. 1 |              | XLOC_058908 | 210 coding  | noncoding | noncoding | noncoding |
| MSTRG. 58673. 1 | LOC105374553 | XLOC_058928 | 268 coding  | noncoding | noncoding | noncoding |
| MSTRG. 58691. 1 | LOC105374557 | XLOC_058932 | 241 coding  | noncoding | noncoding | noncoding |
| MSTRG. 58727. 1 |              | XLOC_058962 | 255 coding  | noncoding | noncoding | noncoding |
| NM_032456. 3    | PCDH7        | XLOC_058985 | 4967 coding | coding    | coding    | coding    |
| MSTRG. 58829. 1 | LOC105374566 | XLOC_059019 | 367 coding  | noncoding | noncoding | noncoding |
| MSTRG. 58831. 1 |              | XLOC_059020 | 271 coding  | noncoding | noncoding | noncoding |
| MSTRG. 58832. 1 |              | XLOC_059021 | 324 coding  | noncoding | noncoding | noncoding |

|                  |              |             |              |           |           |           |
|------------------|--------------|-------------|--------------|-----------|-----------|-----------|
| MSTRG. 58882. 1  | LINC02506    | XLOC_059032 | 251 coding   | noncoding | noncoding | noncoding |
| MSTRG. 58884. 1  |              | XLOC_059034 | 251 coding   | noncoding | noncoding | noncoding |
| MSTRG. 58870. 1  |              | XLOC_059057 | 253 coding   | noncoding | noncoding | noncoding |
| MSTRG. 58899. 1  |              | XLOC_059064 | 276 coding   | noncoding | noncoding | noncoding |
| MSTRG. 58907. 1  | LOC101928622 | XLOC_059068 | 393 coding   | noncoding | noncoding | noncoding |
| MSTRG. 58914. 1  | LINC02484    | XLOC_059071 | 282 coding   | noncoding | noncoding | noncoding |
| MSTRG. 58916. 1  | LINC02484    | XLOC_059072 | 324 coding   | noncoding | noncoding | noncoding |
| MSTRG. 58918. 1  | LINC02484    | XLOC_059073 | 278 coding   | noncoding | noncoding | noncoding |
| MSTRG. 58919. 1  | LINC02484    | XLOC_059074 | 282 coding   | noncoding | noncoding | noncoding |
| XM_011513696. 2  | DTHD1        | XLOC_059126 | 5981 coding  | coding    | coding    | coding    |
| MSTRG. 59077. 1  | LINC02505    | XLOC_059144 | 292 coding   | noncoding | noncoding | noncoding |
| MSTRG. 59085. 1  | LINC02505    | XLOC_059147 | 475 coding   | noncoding | noncoding | noncoding |
| MSTRG. 59097. 1  |              | XLOC_059157 | 291 coding   | noncoding | noncoding | noncoding |
| MSTRG. 59100. 1  |              | XLOC_059160 | 237 coding   | noncoding | noncoding | noncoding |
| MSTRG. 59126. 1  | LOC105374402 | XLOC_059164 | 220 coding   | noncoding | noncoding | noncoding |
| MSTRG. 59344. 1  | TBC1D1       | XLOC_059198 | 313 coding   | noncoding | noncoding | noncoding |
| MSTRG. 59373. 1  | TBC1D1       | XLOC_059225 | 288 coding   | noncoding | noncoding | noncoding |
| MSTRG. 59230. 1  |              | XLOC_059248 | 217 coding   | noncoding | noncoding | noncoding |
| MSTRG. 59235. 1  |              | XLOC_059250 | 381 coding   | noncoding | noncoding | noncoding |
| MSTRG. 59297. 10 | TLR1         | XLOC_059290 | 15000 coding | coding    | coding    | noncoding |
| NM_001007075. 2  | KLHL5        | XLOC_059298 | 7657 coding  | coding    | noncoding | coding    |
| MSTRG. 59316. 1  |              | XLOC_059310 | 314 coding   | noncoding | noncoding | noncoding |
| MSTRG. 59439. 1  | LOC105374419 | XLOC_059323 | 238 coding   | noncoding | noncoding | noncoding |
| MSTRG. 59440. 1  | LOC105374419 | XLOC_059324 | 303 coding   | noncoding | noncoding | noncoding |
| MSTRG. 59448. 1  | UBE2K        | XLOC_059330 | 326 coding   | noncoding | noncoding | noncoding |
| MSTRG. 59453. 1  | UBE2K        | XLOC_059335 | 307 coding   | noncoding | noncoding | noncoding |
| MSTRG. 59455. 1  | UBE2K        | XLOC_059337 | 437 coding   | coding    | noncoding | noncoding |
| MSTRG. 59420. 1  |              | XLOC_059339 | 244 coding   | noncoding | noncoding | noncoding |
| MSTRG. 59457. 5  | PDS5A        | XLOC_059341 | 692 coding   | noncoding | noncoding | noncoding |
| MSTRG. 59425. 1  |              | XLOC_059343 | 313 coding   | noncoding | noncoding | noncoding |
| MSTRG. 59486. 1  | N4BP2        | XLOC_059345 | 306 coding   | noncoding | noncoding | noncoding |
| NM_001278359. 1  | RHOH         | XLOC_059351 | 2268 coding  | coding    | coding    | coding    |
| MSTRG. 59522. 1  | RHOH         | XLOC_059366 | 415 coding   | noncoding | noncoding | noncoding |
| MSTRG. 59473. 1  |              | XLOC_059367 | 437 coding   | noncoding | noncoding | noncoding |
| MSTRG. 59479. 1  |              | XLOC_059371 | 306 coding   | noncoding | noncoding | noncoding |
| MSTRG. 59482. 1  |              | XLOC_059372 | 276 coding   | noncoding | noncoding | noncoding |
| MSTRG. 59536. 11 | RBM47        | XLOC_059373 | 4619 coding  | coding    | coding    | coding    |
| MSTRG. 59536. 12 | RBM47        | XLOC_059373 | 2296 coding  | coding    | coding    | coding    |
| MSTRG. 59568. 1  | NSUN7        | XLOC_059384 | 540 coding   | noncoding | noncoding | noncoding |
| MSTRG. 59576. 1  | APBB2        | XLOC_059389 | 239 coding   | noncoding | noncoding | noncoding |
| XM_011513651. 2  | LIMCH1       | XLOC_059405 | 8762 coding  | coding    | coding    | coding    |
| MSTRG. 59624. 1  | LIMCH1       | XLOC_059408 | 254 coding   | noncoding | noncoding | noncoding |
| MSTRG. 59602. 1  | LOC105374425 | XLOC_059412 | 310 coding   | noncoding | noncoding | noncoding |

|                 |              |             |             |           |           |           |
|-----------------|--------------|-------------|-------------|-----------|-----------|-----------|
| MSTRG. 59604. 1 | LOC105374425 | XLOC_059414 | 273 coding  | noncoding | noncoding | noncoding |
| MSTRG. 59695. 1 |              | XLOC_059440 | 264 coding  | noncoding | noncoding | noncoding |
| MSTRG. 59673. 1 |              | XLOC_059449 | 243 coding  | noncoding | noncoding | noncoding |
| MSTRG. 59677. 1 | LOC105374428 | XLOC_059451 | 294 coding  | noncoding | noncoding | noncoding |
| MSTRG. 59678. 1 | LOC105374428 | XLOC_059452 | 217 coding  | noncoding | noncoding | noncoding |
| MSTRG. 59699. 1 | LOC105374430 | XLOC_059460 | 227 coding  | noncoding | noncoding | noncoding |
| MSTRG. 59708. 1 |              | XLOC_059467 | 274 coding  | coding    | noncoding | noncoding |
| MSTRG. 59714. 1 |              | XLOC_059468 | 210 coding  | noncoding | noncoding | noncoding |
| MSTRG. 59719. 1 |              | XLOC_059470 | 400 coding  | noncoding | noncoding | noncoding |
| MSTRG. 59736. 1 |              | XLOC_059479 | 256 coding  | noncoding | noncoding | noncoding |
| MSTRG. 59737. 1 |              | XLOC_059480 | 292 coding  | noncoding | noncoding | noncoding |
| MSTRG. 59741. 1 |              | XLOC_059482 | 269 coding  | noncoding | coding    | noncoding |
| NM_001345867. 1 | GUF1         | XLOC_059500 | 4233 coding | coding    | coding    | coding    |
| MSTRG. 59789. 1 |              | XLOC_059512 | 253 coding  | noncoding | noncoding | noncoding |
| MSTRG. 59799. 1 |              | XLOC_059517 | 283 coding  | noncoding | noncoding | noncoding |
| MSTRG. 59801. 1 |              | XLOC_059519 | 306 coding  | noncoding | noncoding | noncoding |
| MSTRG. 59869. 1 |              | XLOC_059522 | 246 coding  | coding    | noncoding | noncoding |
| MSTRG. 59856. 1 |              | XLOC_059523 | 292 coding  | noncoding | noncoding | noncoding |
| MSTRG. 59854. 1 |              | XLOC_059524 | 300 coding  | noncoding | noncoding | noncoding |
| MSTRG. 59872. 1 |              | XLOC_059526 | 242 coding  | noncoding | noncoding | noncoding |
| MSTRG. 59874. 1 |              | XLOC_059528 | 214 coding  | noncoding | noncoding | noncoding |
| MSTRG. 59873. 1 |              | XLOC_059530 | 306 coding  | noncoding | noncoding | noncoding |
| MSTRG. 59885. 1 |              | XLOC_059536 | 304 coding  | noncoding | noncoding | noncoding |
| MSTRG. 59906. 1 | COX7B2       | XLOC_059544 | 294 coding  | noncoding | noncoding | noncoding |
| MSTRG. 59924. 1 | GABRB1       | XLOC_059551 | 261 coding  | noncoding | noncoding | noncoding |
| MSTRG. 59929. 1 | GABRB1       | XLOC_059555 | 287 coding  | noncoding | noncoding | noncoding |
| MSTRG. 59935. 1 | GABRB1       | XLOC_059559 | 258 coding  | noncoding | noncoding | noncoding |
| MSTRG. 59936. 1 | GABRB1       | XLOC_059560 | 287 coding  | noncoding | noncoding | noncoding |
| MSTRG. 60041. 1 | CORIN        | XLOC_059585 | 285 coding  | coding    | noncoding | noncoding |
| MSTRG. 60049. 1 | CORIN        | XLOC_059593 | 242 coding  | noncoding | noncoding | noncoding |
| MSTRG. 60050. 1 | CORIN        | XLOC_059594 | 278 coding  | noncoding | noncoding | noncoding |
| MSTRG. 59996. 4 | TXK          | XLOC_059617 | 2455 coding | noncoding | noncoding | noncoding |
| MSTRG. 59959. 1 |              | XLOC_059621 | 212 coding  | noncoding | noncoding | noncoding |
| MSTRG. 60102. 1 |              | XLOC_059648 | 324 coding  | noncoding | noncoding | noncoding |
| MSTRG. 60123. 1 |              | XLOC_059654 | 256 coding  | noncoding | noncoding | noncoding |
| MSTRG. 60200. 1 | LOC107986279 | XLOC_059698 | 264 coding  | coding    | noncoding | noncoding |
| MSTRG. 60546. 1 | LOC105377654 | XLOC_059725 | 295 coding  | noncoding | noncoding | noncoding |
| MSTRG. 60562. 1 | LNx1         | XLOC_059740 | 249 coding  | coding    | noncoding | noncoding |
| MSTRG. 60567. 1 | LNx1         | XLOC_059745 | 316 coding  | noncoding | noncoding | noncoding |
| MSTRG. 60572. 1 | LNx1         | XLOC_059750 | 252 coding  | noncoding | noncoding | noncoding |
| MSTRG. 60305. 1 |              | XLOC_059758 | 319 coding  | noncoding | noncoding | noncoding |
| MSTRG. 60387. 5 | CHIC2        | XLOC_059793 | 1260 coding | coding    | coding    | coding    |
| MSTRG. 60348. 1 |              | XLOC_059799 | 297 coding  | noncoding | noncoding | noncoding |

|                 |              |             |             |           |           |           |
|-----------------|--------------|-------------|-------------|-----------|-----------|-----------|
| MSTRG. 60349. 1 |              | XLOC_059800 | 227 coding  | noncoding | noncoding | noncoding |
| MSTRG. 60352. 1 |              | XLOC_059801 | 257 coding  | noncoding | noncoding | noncoding |
| NM_001347830. 1 | PDGFRA       | XLOC_059802 | 6796 coding | coding    | coding    | coding    |
| MSTRG. 60353. 1 |              | XLOC_059805 | 272 coding  | noncoding | noncoding | noncoding |
| MSTRG. 60424. 1 | LOC105377657 | XLOC_059818 | 317 coding  | coding    | noncoding | noncoding |
| MSTRG. 60446. 1 |              | XLOC_059826 | 284 coding  | noncoding | noncoding | noncoding |
| MSTRG. 60451. 1 |              | XLOC_059830 | 357 coding  | coding    | noncoding | noncoding |
| MSTRG. 60452. 1 |              | XLOC_059831 | 312 coding  | noncoding | noncoding | noncoding |
| MSTRG. 60462. 1 |              | XLOC_059834 | 213 coding  | noncoding | noncoding | noncoding |
| NM_018475. 5    | TMEM165      | XLOC_059838 | 1931 coding | coding    | coding    | coding    |
| MSTRG. 60476. 1 | PDCL2        | XLOC_059849 | 274 coding  | noncoding | noncoding | noncoding |
| XM_005265752. 2 | KIAA1211     | XLOC_059875 | 6918 coding | coding    | coding    | coding    |
| MSTRG. 60498. 1 | KIAA1211     | XLOC_059877 | 259 coding  | noncoding | noncoding | noncoding |
| NM_001256475. 2 | THEGL        | XLOC_059892 | 1653 coding | coding    | noncoding | coding    |
| MSTRG. 60606. 1 | THEGL        | XLOC_059893 | 208 coding  | noncoding | noncoding | noncoding |
| MSTRG. 60615. 2 | HOPX         | XLOC_059898 | 996 coding  | coding    | noncoding | noncoding |
| MSTRG. 60630. 1 |              | XLOC_059906 | 313 coding  | noncoding | noncoding | noncoding |
| MSTRG. 60637. 1 |              | XLOC_059909 | 242 coding  | noncoding | noncoding | noncoding |
| MSTRG. 60643. 1 |              | XLOC_059918 | 365 coding  | noncoding | noncoding | noncoding |
| MSTRG. 60688. 1 |              | XLOC_059924 | 246 coding  | noncoding | noncoding | noncoding |
| MSTRG. 60696. 1 |              | XLOC_059934 | 245 coding  | noncoding | noncoding | noncoding |
| MSTRG. 60710. 1 |              | XLOC_059942 | 271 coding  | noncoding | noncoding | noncoding |
| MSTRG. 60709. 1 |              | XLOC_059943 | 230 coding  | noncoding | noncoding | noncoding |
| MSTRG. 60739. 1 |              | XLOC_059955 | 386 coding  | noncoding | noncoding | noncoding |
| MSTRG. 60786. 1 |              | XLOC_059975 | 200 coding  | noncoding | noncoding | noncoding |
| MSTRG. 60800. 1 |              | XLOC_059982 | 279 coding  | coding    | noncoding | noncoding |
| MSTRG. 60814. 1 |              | XLOC_059988 | 281 coding  | noncoding | noncoding | noncoding |
| MSTRG. 60861. 1 | ADGRL3       | XLOC_060001 | 218 coding  | noncoding | noncoding | noncoding |
| MSTRG. 60886. 1 | ADGRL3-AS1   | XLOC_060015 | 241 coding  | noncoding | noncoding | noncoding |
| MSTRG. 60851. 1 |              | XLOC_060026 | 406 coding  | noncoding | noncoding | noncoding |
| MSTRG. 60854. 1 |              | XLOC_060029 | 255 coding  | noncoding | noncoding | noncoding |
| MSTRG. 60891. 1 |              | XLOC_060033 | 223 coding  | noncoding | noncoding | noncoding |
| MSTRG. 60902. 1 |              | XLOC_060042 | 297 coding  | noncoding | noncoding | noncoding |
| MSTRG. 60916. 1 |              | XLOC_060043 | 261 coding  | noncoding | noncoding | noncoding |
| MSTRG. 60918. 1 |              | XLOC_060045 | 257 coding  | noncoding | noncoding | noncoding |
| MSTRG. 60920. 1 |              | XLOC_060046 | 308 coding  | noncoding | noncoding | noncoding |
| MSTRG. 60971. 1 |              | XLOC_060078 | 288 coding  | noncoding | noncoding | noncoding |
| MSTRG. 60972. 1 |              | XLOC_060079 | 358 coding  | coding    | noncoding | noncoding |
| MSTRG. 61000. 1 |              | XLOC_060091 | 208 coding  | noncoding | noncoding | noncoding |
| MSTRG. 61008. 1 |              | XLOC_060094 | 253 coding  | noncoding | noncoding | noncoding |
| MSTRG. 61035. 1 |              | XLOC_060107 | 303 coding  | noncoding | noncoding | noncoding |
| MSTRG. 61037. 1 |              | XLOC_060108 | 265 coding  | noncoding | noncoding | noncoding |
| MSTRG. 61048. 1 | STAP1        | XLOC_060117 | 307 coding  | noncoding | noncoding | noncoding |

|                  |              |             |              |           |           |           |
|------------------|--------------|-------------|--------------|-----------|-----------|-----------|
| MSTRG. 61116. 1  | TMPRSS11F    | XLOC_060141 | 246 coding   | noncoding | noncoding | noncoding |
| MSTRG. 61260. 7  | SULT1B1      | XLOC_060191 | 6456 coding  | coding    | coding    | coding    |
| MSTRG. 61260. 8  | SULT1B1      | XLOC_060191 | 2812 coding  | coding    | noncoding | noncoding |
| MSTRG. 61259. 1  |              | XLOC_060198 | 322 coding   | noncoding | noncoding | noncoding |
| MSTRG. 61280. 1  | AMTN         | XLOC_060219 | 265 coding   | noncoding | noncoding | noncoding |
| MSTRG. 61278. 1  |              | XLOC_060220 | 226 coding   | noncoding | noncoding | noncoding |
| MSTRG. 61283. 1  |              | XLOC_060222 | 311 coding   | noncoding | noncoding | noncoding |
| MSTRG. 61293. 2  | JCHAIN       | XLOC_060228 | 1229 coding  | coding    | noncoding | noncoding |
| MSTRG. 61325. 1  | RUFY3        | XLOC_060235 | 249 coding   | noncoding | noncoding | noncoding |
| MSTRG. 61327. 1  | RUFY3        | XLOC_060237 | 295 coding   | coding    | noncoding | noncoding |
| MSTRG. 61317. 1  |              | XLOC_060248 | 332 coding   | coding    | noncoding | noncoding |
| XM_024454267. 1  | SLC4A4       | XLOC_060251 | 9576 coding  | coding    | coding    | coding    |
| MSTRG. 61400. 1  | SLC4A4       | XLOC_060255 | 299 coding   | coding    | noncoding | noncoding |
| MSTRG. 61434. 1  | SLC4A4       | XLOC_060272 | 262 coding   | coding    | noncoding | noncoding |
| MSTRG. 61344. 1  |              | XLOC_060276 | 233 coding   | noncoding | noncoding | noncoding |
| MSTRG. 61345. 1  |              | XLOC_060277 | 308 coding   | noncoding | noncoding | noncoding |
| MSTRG. 61371. 1  | ADAMTS3      | XLOC_060286 | 316 coding   | noncoding | noncoding | noncoding |
| MSTRG. 61360. 1  |              | XLOC_060292 | 289 coding   | noncoding | noncoding | noncoding |
| NM_001354840. 2  | CXCL8        | XLOC_060340 | 672 coding   | coding    | noncoding | noncoding |
| NM_002620. 4     | PF4V1        | XLOC_060345 | 743 coding   | coding    | noncoding | noncoding |
| MSTRG. 61490. 1  |              | XLOC_060356 | 277 coding   | noncoding | noncoding | noncoding |
| NM_001270989. 2  | EPGN         | XLOC_060373 | 2681 coding  | noncoding | coding    | coding    |
| NM_001432. 3     | EREG         | XLOC_060378 | 4615 coding  | noncoding | noncoding | coding    |
| MSTRG. 61526. 1  |              | XLOC_060390 | 244 coding   | noncoding | noncoding | noncoding |
| MSTRG. 61591. 1  |              | XLOC_060415 | 253 coding   | coding    | noncoding | noncoding |
| MSTRG. 61685. 1  | CDKL2        | XLOC_060434 | 293 coding   | noncoding | noncoding | noncoding |
| MSTRG. 61708. 1  | LOC105377284 | XLOC_060448 | 473 coding   | noncoding | noncoding | noncoding |
| MSTRG. 61711. 1  | PPEF2        | XLOC_060449 | 285 coding   | noncoding | noncoding | noncoding |
| MSTRG. 61739. 5  | NAAA         | XLOC_060452 | 1138 coding  | coding    | coding    | noncoding |
| MSTRG. 61739. 10 | NAAA         | XLOC_060452 | 1947 coding  | coding    | coding    | noncoding |
| MSTRG. 61733. 1  | ART3         | XLOC_060457 | 270 coding   | coding    | noncoding | noncoding |
| NM_001242939. 1  | FAM47E-STBD1 | XLOC_060464 | 3060 coding  | coding    | coding    | coding    |
| MSTRG. 61811. 1  | LOC105377289 | XLOC_060477 | 224 coding   | noncoding | noncoding | noncoding |
| MSTRG. 61784. 1  | SOWAHB       | XLOC_060481 | 289 coding   | noncoding | noncoding | noncoding |
| MSTRG. 61942. 1  | CXCL13       | XLOC_060531 | 204 coding   | noncoding | noncoding | noncoding |
| MSTRG. 61943. 1  | CXCL13       | XLOC_060532 | 249 coding   | coding    | noncoding | noncoding |
| MSTRG. 62013. 4  | CNOT6L       | XLOC_060552 | 12727 coding | coding    | coding    | noncoding |
| MSTRG. 61963. 1  |              | XLOC_060556 | 228 coding   | noncoding | noncoding | noncoding |
| MSTRG. 61978. 1  | MRPL1        | XLOC_060560 | 269 coding   | noncoding | noncoding | noncoding |
| MSTRG. 61971. 1  |              | XLOC_060567 | 279 coding   | noncoding | noncoding | noncoding |
| NM_001166133. 1  | FRAS1        | XLOC_060570 | 7217 coding  | coding    | coding    | coding    |
| MSTRG. 61989. 1  | FRAS1        | XLOC_060573 | 260 coding   | coding    | noncoding | noncoding |
| MSTRG. 61994. 1  | FRAS1        | XLOC_060577 | 305 coding   | coding    | noncoding | noncoding |

|                  |              |             |              |           |           |           |
|------------------|--------------|-------------|--------------|-----------|-----------|-----------|
| MSTRG. 62083. 1  | LINC01088    | XLOC_060637 | 278 coding   | noncoding | noncoding | noncoding |
| MSTRG. 62091. 1  | LINC01088    | XLOC_060641 | 259 coding   | noncoding | noncoding | noncoding |
| MSTRG. 62098. 1  | NAA11        | XLOC_060643 | 249 coding   | noncoding | noncoding | noncoding |
| MSTRG. 62101. 1  | NAA11        | XLOC_060645 | 294 coding   | coding    | noncoding | noncoding |
| XR_001741747. 1  | LOC107986294 | XLOC_060653 | 14647 coding | noncoding | noncoding | noncoding |
| MSTRG. 62106. 1  | LINC02469    | XLOC_060657 | 308 coding   | noncoding | noncoding | noncoding |
| MSTRG. 62109. 1  | LOC105377302 | XLOC_060658 | 269 coding   | noncoding | noncoding | noncoding |
| XM_011531816. 2  | CFAP299      | XLOC_060680 | 2311 coding  | coding    | coding    | coding    |
| MSTRG. 62212. 1  | CFAP299      | XLOC_060689 | 261 coding   | noncoding | noncoding | noncoding |
| MSTRG. 62265. 1  |              | XLOC_060708 | 284 coding   | noncoding | noncoding | noncoding |
| MSTRG. 62263. 1  |              | XLOC_060710 | 234 coding   | noncoding | noncoding | noncoding |
| MSTRG. 62333. 1  | LOC107986215 | XLOC_060732 | 267 coding   | noncoding | noncoding | noncoding |
| MSTRG. 62372. 4  | HNRNPDL      | XLOC_060753 | 2789 coding  | coding    | coding    | coding    |
| MSTRG. 62411. 4  | LIN54        | XLOC_060764 | 3778 coding  | coding    | coding    | noncoding |
| MSTRG. 62424. 8  | PLAC8        | XLOC_060771 | 2531 coding  | noncoding | noncoding | noncoding |
| MSTRG. 62421. 1  |              | XLOC_060772 | 254 coding   | noncoding | noncoding | noncoding |
| MSTRG. 62435. 1  |              | XLOC_060813 | 249 coding   | noncoding | noncoding | noncoding |
| MSTRG. 62528. 1  | LOC101928978 | XLOC_060831 | 263 coding   | noncoding | noncoding | noncoding |
| MSTRG. 62592. 15 | WDFY3        | XLOC_060848 | 4597 coding  | noncoding | coding    | noncoding |
| MSTRG. 62592. 21 | WDFY3        | XLOC_060848 | 561 coding   | noncoding | noncoding | noncoding |
| MSTRG. 62561. 1  |              | XLOC_060855 | 331 coding   | noncoding | noncoding | noncoding |
| NM_031305. 3     | ARHGAP24     | XLOC_060862 | 4827 coding  | coding    | coding    | coding    |
| MSTRG. 62789. 1  | ARHGAP24     | XLOC_060878 | 297 coding   | coding    | noncoding | noncoding |
| MSTRG. 62816. 1  | ARHGAP24     | XLOC_060901 | 336 coding   | noncoding | noncoding | noncoding |
| MSTRG. 62822. 1  | ARHGAP24     | XLOC_060907 | 249 coding   | noncoding | noncoding | noncoding |
| MSTRG. 62654. 1  | MAPK10       | XLOC_060917 | 305 coding   | noncoding | noncoding | noncoding |
| MSTRG. 62667. 1  | MAPK10       | XLOC_060926 | 384 coding   | coding    | noncoding | noncoding |
| MSTRG. 62574. 1  |              | XLOC_060938 | 229 coding   | noncoding | noncoding | noncoding |
| MSTRG. 62829. 1  |              | XLOC_060941 | 509 coding   | noncoding | noncoding | noncoding |
| MSTRG. 62833. 1  | AFF1-AS1     | XLOC_060944 | 236 coding   | noncoding | noncoding | noncoding |
| MSTRG. 62843. 1  | AFF1         | XLOC_060952 | 474 coding   | coding    | coding    | noncoding |
| MSTRG. 62868. 1  | AFF1         | XLOC_060974 | 251 coding   | noncoding | noncoding | noncoding |
| MSTRG. 62710. 1  |              | XLOC_060990 | 275 coding   | noncoding | noncoding | noncoding |
| MSTRG. 62729. 1  |              | XLOC_060998 | 290 coding   | noncoding | noncoding | noncoding |
| MSTRG. 62731. 1  |              | XLOC_060999 | 233 coding   | noncoding | noncoding | noncoding |
| MSTRG. 62757. 1  |              | XLOC_061003 | 315 coding   | noncoding | noncoding | noncoding |
| XM_011532029. 1  | PKD2         | XLOC_061011 | 4369 coding  | coding    | coding    | coding    |
| MSTRG. 62878. 1  | PKD2         | XLOC_061012 | 225 coding   | noncoding | noncoding | noncoding |
| MSTRG. 62886. 1  | ABCG2        | XLOC_061015 | 227 coding   | noncoding | noncoding | noncoding |
| MSTRG. 62892. 1  | PPM1K-DT     | XLOC_061019 | 277 coding   | noncoding | noncoding | noncoding |
| XM_017008808. 1  | HERC3        | XLOC_061032 | 4637 coding  | coding    | coding    | coding    |
| MSTRG. 62920. 1  |              | XLOC_061055 | 236 coding   | noncoding | noncoding | noncoding |
| MSTRG. 62929. 1  |              | XLOC_061062 | 319 coding   | noncoding | noncoding | noncoding |

|                 |              |             |              |           |           |           |
|-----------------|--------------|-------------|--------------|-----------|-----------|-----------|
| MSTRG. 62933. 1 | LOC105377328 | XLOC_061063 | 342 coding   | coding    | noncoding | noncoding |
| XM_011531941. 2 | CCSER1       | XLOC_061085 | 14387 coding | coding    | coding    | coding    |
| MSTRG. 63193. 1 | CCSER1       | XLOC_061086 | 236 coding   | noncoding | noncoding | noncoding |
| MSTRG. 63251. 1 | CCSER1       | XLOC_061098 | 276 coding   | noncoding | noncoding | noncoding |
| MSTRG. 63260. 1 | CCSER1       | XLOC_061102 | 206 coding   | noncoding | noncoding | noncoding |
| MSTRG. 63297. 1 | CCSER1       | XLOC_061113 | 281 coding   | noncoding | noncoding | noncoding |
| MSTRG. 63331. 1 | CCSER1       | XLOC_061118 | 271 coding   | noncoding | noncoding | noncoding |
| XR_002959799. 1 | LOC112268468 | XLOC_061126 | 551 coding   | noncoding | noncoding | noncoding |
| MSTRG. 63000. 1 |              | XLOC_061128 | 278 coding   | noncoding | noncoding | noncoding |
| XM_017008120. 2 | GRID2        | XLOC_061129 | 12797 coding | coding    | coding    | coding    |
| MSTRG. 63069. 1 | GRID2        | XLOC_061141 | 305 coding   | noncoding | noncoding | noncoding |
| MSTRG. 63099. 1 | GRID2        | XLOC_061159 | 272 coding   | coding    | noncoding | noncoding |
| MSTRG. 63106. 1 | GRID2        | XLOC_061162 | 239 coding   | noncoding | noncoding | noncoding |
| MSTRG. 63380. 1 | PDLIM5       | XLOC_061197 | 227 coding   | noncoding | noncoding | noncoding |
| MSTRG. 63385. 1 | PDLIM5       | XLOC_061202 | 211 coding   | noncoding | noncoding | noncoding |
| MSTRG. 63391. 1 | PDLIM5       | XLOC_061208 | 296 coding   | noncoding | noncoding | noncoding |
| MSTRG. 63118. 1 | BMPR1B       | XLOC_061215 | 259 coding   | noncoding | noncoding | noncoding |
| MSTRG. 63131. 1 | UNC5C        | XLOC_061218 | 210 coding   | noncoding | noncoding | noncoding |
| NM_005390. 5    | PDHA2        | XLOC_061226 | 1372 coding  | coding    | coding    | coding    |
| MSTRG. 63151. 1 |              | XLOC_061229 | 284 coding   | noncoding | noncoding | noncoding |
| MSTRG. 63177. 1 | LINC02267    | XLOC_061234 | 289 coding   | noncoding | noncoding | noncoding |
| MSTRG. 63153. 1 |              | XLOC_061237 | 282 coding   | noncoding | noncoding | noncoding |
| MSTRG. 63160. 1 |              | XLOC_061242 | 280 coding   | noncoding | noncoding | noncoding |
| MSTRG. 63539. 1 | LOC100507053 | XLOC_061325 | 264 coding   | noncoding | noncoding | noncoding |
| MSTRG. 63552. 1 | ADH6         | XLOC_061326 | 309 coding   | noncoding | noncoding | noncoding |
| MSTRG. 63556. 1 | LOC100507053 | XLOC_061327 | 241 coding   | noncoding | noncoding | noncoding |
| NM_000253. 3    | MTTP         | XLOC_061336 | 4095 coding  | coding    | coding    | coding    |
| MSTRG. 63590. 1 |              | XLOC_061373 | 251 coding   | noncoding | noncoding | noncoding |
| MSTRG. 63594. 1 |              | XLOC_061375 | 314 coding   | noncoding | noncoding | noncoding |
| MSTRG. 63625. 1 |              | XLOC_061392 | 515 coding   | noncoding | noncoding | noncoding |
| MSTRG. 63755. 9 | PPP3CA       | XLOC_061395 | 6986 coding  | noncoding | noncoding | noncoding |
| MSTRG. 63692. 1 |              | XLOC_061401 | 307 coding   | noncoding | noncoding | noncoding |
| MSTRG. 63698. 1 |              | XLOC_061404 | 387 coding   | coding    | noncoding | noncoding |
| MSTRG. 63968. 2 | MANBA        | XLOC_061478 | 3253 coding  | coding    | coding    | noncoding |
| MSTRG. 64081. 1 | CISD2        | XLOC_061493 | 283 coding   | noncoding | noncoding | noncoding |
| MSTRG. 64132. 1 | CENPE        | XLOC_061528 | 258 coding   | noncoding | noncoding | noncoding |
| MSTRG. 63875. 1 |              | XLOC_061532 | 252 coding   | noncoding | noncoding | noncoding |
| MSTRG. 63877. 1 |              | XLOC_061533 | 258 coding   | noncoding | noncoding | noncoding |
| MSTRG. 63912. 1 |              | XLOC_061552 | 259 coding   | noncoding | noncoding | noncoding |
| MSTRG. 64058. 1 |              | XLOC_061573 | 296 coding   | noncoding | noncoding | noncoding |
| MSTRG. 64136. 1 |              | XLOC_061603 | 263 coding   | noncoding | noncoding | noncoding |
| MSTRG. 64193. 1 |              | XLOC_061623 | 281 coding   | noncoding | noncoding | noncoding |
| MSTRG. 64209. 1 |              | XLOC_061631 | 712 coding   | noncoding | noncoding | noncoding |

|                  |              |             |             |           |           |           |
|------------------|--------------|-------------|-------------|-----------|-----------|-----------|
| MSTRG. 64211. 1  |              | XLOC_061632 | 317 coding  | coding    | noncoding | noncoding |
| MSTRG. 64223. 1  |              | XLOC_061640 | 209 coding  | noncoding | noncoding | noncoding |
| MSTRG. 64232. 1  |              | XLOC_061644 | 297 coding  | noncoding | noncoding | noncoding |
| MSTRG. 64252. 1  | LOC105377358 | XLOC_061656 | 248 coding  | noncoding | noncoding | noncoding |
| MSTRG. 64256. 1  | LOC105377357 | XLOC_061659 | 248 coding  | noncoding | noncoding | noncoding |
| XR_002959727. 1  | HADH         | XLOC_061674 | 2162 coding | coding    | coding    | coding    |
| MSTRG. 64369. 1  |              | XLOC_061721 | 329 coding  | noncoding | noncoding | noncoding |
| MSTRG. 64415. 1  |              | XLOC_061727 | 252 coding  | noncoding | noncoding | noncoding |
| MSTRG. 64418. 1  |              | XLOC_061729 | 315 coding  | coding    | noncoding | noncoding |
| MSTRG. 64444. 1  | COL25A1      | XLOC_061734 | 298 coding  | noncoding | noncoding | noncoding |
| MSTRG. 64468. 1  | COL25A1      | XLOC_061744 | 317 coding  | noncoding | noncoding | noncoding |
| MSTRG. 64547. 13 | SEC24B       | XLOC_061762 | 310 coding  | noncoding | noncoding | noncoding |
| MSTRG. 64590. 1  | MCUB         | XLOC_061782 | 261 coding  | noncoding | noncoding | noncoding |
| XM_017007845. 1  | EGF          | XLOC_061801 | 5632 coding | coding    | coding    | coding    |
| MSTRG. 64631. 1  |              | XLOC_061808 | 263 coding  | noncoding | noncoding | noncoding |
| MSTRG. 64655. 1  |              | XLOC_061813 | 296 coding  | noncoding | noncoding | noncoding |
| MSTRG. 64649. 1  |              | XLOC_061821 | 305 coding  | coding    | noncoding | noncoding |
| MSTRG. 64651. 1  | PANCR        | XLOC_061822 | 309 coding  | noncoding | noncoding | noncoding |
| MSTRG. 64684. 1  |              | XLOC_061832 | 361 coding  | noncoding | noncoding | noncoding |
| MSTRG. 64691. 1  |              | XLOC_061836 | 256 coding  | noncoding | noncoding | noncoding |
| MSTRG. 64699. 1  |              | XLOC_061841 | 276 coding  | noncoding | noncoding | noncoding |
| MSTRG. 64716. 1  |              | XLOC_061853 | 259 coding  | noncoding | noncoding | noncoding |
| MSTRG. 64722. 1  |              | XLOC_061860 | 362 coding  | noncoding | noncoding | noncoding |
| MSTRG. 64733. 1  |              | XLOC_061861 | 299 coding  | noncoding | noncoding | noncoding |
| MSTRG. 64737. 1  |              | XLOC_061863 | 257 coding  | noncoding | noncoding | noncoding |
| MSTRG. 64740. 1  |              | XLOC_061865 | 284 coding  | noncoding | noncoding | noncoding |
| MSTRG. 64777. 1  | ALPK1        | XLOC_061882 | 355 coding  | coding    | noncoding | noncoding |
| MSTRG. 64772. 1  |              | XLOC_061928 | 244 coding  | noncoding | noncoding | noncoding |
| MSTRG. 64838. 1  | ANK2         | XLOC_061930 | 281 coding  | noncoding | noncoding | noncoding |
| MSTRG. 64858. 1  | ANK2         | XLOC_061939 | 276 coding  | noncoding | noncoding | noncoding |
| MSTRG. 64862. 1  |              | XLOC_061947 | 263 coding  | noncoding | noncoding | noncoding |
| MSTRG. 64922. 1  |              | XLOC_061977 | 321 coding  | noncoding | noncoding | noncoding |
| MSTRG. 64923. 1  |              | XLOC_061978 | 244 coding  | noncoding | noncoding | noncoding |
| MSTRG. 64947. 1  |              | XLOC_061985 | 259 coding  | noncoding | noncoding | noncoding |
| MSTRG. 64956. 1  |              | XLOC_061991 | 251 coding  | noncoding | noncoding | noncoding |
| MSTRG. 64957. 1  |              | XLOC_061992 | 251 coding  | noncoding | noncoding | noncoding |
| MSTRG. 64958. 1  |              | XLOC_061993 | 200 coding  | noncoding | noncoding | noncoding |
| MSTRG. 64985. 1  |              | XLOC_062004 | 304 coding  | noncoding | noncoding | noncoding |
| MSTRG. 64992. 1  |              | XLOC_062008 | 252 coding  | noncoding | noncoding | noncoding |
| MSTRG. 65001. 1  | LOC107986306 | XLOC_062010 | 254 coding  | noncoding | noncoding | noncoding |
| MSTRG. 64994. 1  |              | XLOC_062012 | 279 coding  | noncoding | noncoding | noncoding |
| MSTRG. 65015. 1  |              | XLOC_062020 | 261 coding  | noncoding | noncoding | noncoding |
| MSTRG. 65133. 1  | NDST3        | XLOC_062076 | 278 coding  | noncoding | noncoding | noncoding |

|                 |              |             |              |           |           |           |
|-----------------|--------------|-------------|--------------|-----------|-----------|-----------|
| MSTRG. 65140. 1 | NDST3        | XLOC_062080 | 340 coding   | coding    | noncoding | noncoding |
| MSTRG. 65161. 1 |              | XLOC_062092 | 267 coding   | noncoding | noncoding | noncoding |
| MSTRG. 65166. 1 |              | XLOC_062094 | 362 coding   | noncoding | noncoding | noncoding |
| MSTRG. 65177. 1 | LOC729218    | XLOC_062097 | 588 coding   | noncoding | noncoding | coding    |
| NM_001128933. 3 | SYNPO2       | XLOC_062105 | 15417 coding | coding    | coding    | coding    |
| MSTRG. 65189. 1 |              | XLOC_062109 | 215 coding   | noncoding | noncoding | noncoding |
| MSTRG. 65191. 1 |              | XLOC_062110 | 233 coding   | coding    | noncoding | noncoding |
| MSTRG. 65193. 1 |              | XLOC_062111 | 207 coding   | noncoding | noncoding | noncoding |
| MSTRG. 65253. 1 | LINC01061    | XLOC_062139 | 650 coding   | coding    | coding    | noncoding |
| MSTRG. 65276. 1 |              | XLOC_062161 | 442 coding   | noncoding | noncoding | noncoding |
| MSTRG. 65312. 1 |              | XLOC_062175 | 268 coding   | noncoding | noncoding | noncoding |
| MSTRG. 65314. 1 |              | XLOC_062176 | 213 coding   | noncoding | noncoding | noncoding |
| MSTRG. 65345. 1 |              | XLOC_062232 | 316 coding   | noncoding | noncoding | noncoding |
| MSTRG. 65380. 1 |              | XLOC_062259 | 304 coding   | noncoding | noncoding | noncoding |
| MSTRG. 65390. 1 |              | XLOC_062267 | 258 coding   | noncoding | noncoding | noncoding |
| MSTRG. 65392. 1 |              | XLOC_062269 | 283 coding   | noncoding | noncoding | noncoding |
| MSTRG. 65406. 1 |              | XLOC_062293 | 315 coding   | noncoding | noncoding | noncoding |
| XM_017008696. 1 | KIAA1109     | XLOC_062297 | 15803 coding | coding    | coding    | coding    |
| XM_005262743. 3 | ADAD1        | XLOC_062330 | 1931 coding  | coding    | coding    | coding    |
| MSTRG. 65511. 1 | ADAD1        | XLOC_062331 | 280 coding   | noncoding | noncoding | noncoding |
| MSTRG. 65515. 1 |              | XLOC_062335 | 312 coding   | noncoding | noncoding | noncoding |
| MSTRG. 65533. 1 |              | XLOC_062343 | 353 coding   | noncoding | noncoding | noncoding |
| XM_017007829. 1 | SPATA5       | XLOC_062353 | 4037 coding  | coding    | coding    | coding    |
| MSTRG. 65835. 1 | SPATA5       | XLOC_062368 | 224 coding   | noncoding | noncoding | noncoding |
| MSTRG. 65843. 1 | SPATA5       | XLOC_062376 | 355 coding   | coding    | noncoding | noncoding |
| MSTRG. 65558. 1 | LINC01091    | XLOC_062388 | 296 coding   | noncoding | noncoding | noncoding |
| MSTRG. 65547. 1 |              | XLOC_062393 | 305 coding   | noncoding | noncoding | noncoding |
| MSTRG. 65575. 1 | LOC105377407 | XLOC_062397 | 501 coding   | noncoding | noncoding | noncoding |
| MSTRG. 65566. 1 |              | XLOC_062404 | 280 coding   | noncoding | noncoding | noncoding |
| MSTRG. 65607. 1 |              | XLOC_062424 | 273 coding   | noncoding | noncoding | noncoding |
| MSTRG. 65621. 1 |              | XLOC_062435 | 837 coding   | noncoding | noncoding | noncoding |
| MSTRG. 65708. 1 |              | XLOC_062449 | 278 coding   | noncoding | noncoding | noncoding |
| MSTRG. 65693. 1 |              | XLOC_062450 | 299 coding   | noncoding | noncoding | noncoding |
| MSTRG. 65702. 1 |              | XLOC_062454 | 372 coding   | noncoding | noncoding | noncoding |
| MSTRG. 65715. 1 |              | XLOC_062458 | 250 coding   | noncoding | noncoding | noncoding |
| MSTRG. 65718. 1 |              | XLOC_062460 | 313 coding   | noncoding | noncoding | noncoding |
| MSTRG. 65725. 1 |              | XLOC_062464 | 349 coding   | noncoding | noncoding | noncoding |
| MSTRG. 65743. 1 |              | XLOC_062474 | 293 coding   | noncoding | noncoding | noncoding |
| MSTRG. 65746. 1 |              | XLOC_062483 | 295 coding   | coding    | noncoding | noncoding |
| MSTRG. 65784. 1 |              | XLOC_062503 | 251 coding   | noncoding | noncoding | noncoding |
| MSTRG. 65876. 1 | LARP1B       | XLOC_062522 | 218 coding   | noncoding | noncoding | noncoding |
| MSTRG. 65878. 1 | LARP1B       | XLOC_062523 | 321 coding   | noncoding | noncoding | noncoding |
| MSTRG. 65867. 1 |              | XLOC_062525 | 225 coding   | noncoding | noncoding | noncoding |

|                  |              |             |             |           |           |           |
|------------------|--------------|-------------|-------------|-----------|-----------|-----------|
| MSTRG. 65895. 2  | PGRMC2       | XLOC_062526 | 1528 coding | coding    | noncoding | noncoding |
| MSTRG. 65911. 1  | LINC02615    | XLOC_062534 | 255 coding  | noncoding | noncoding | noncoding |
| MSTRG. 65913. 1  |              | XLOC_062540 | 212 coding  | noncoding | noncoding | noncoding |
| MSTRG. 65922. 1  |              | XLOC_062546 | 283 coding  | noncoding | noncoding | noncoding |
| MSTRG. 65938. 1  |              | XLOC_062556 | 273 coding  | noncoding | noncoding | noncoding |
| MSTRG. 65948. 1  |              | XLOC_062560 | 378 coding  | coding    | noncoding | noncoding |
| MSTRG. 65954. 1  |              | XLOC_062563 | 203 coding  | noncoding | noncoding | noncoding |
| MSTRG. 65955. 1  |              | XLOC_062564 | 262 coding  | noncoding | noncoding | noncoding |
| MSTRG. 65957. 1  |              | XLOC_062565 | 346 coding  | noncoding | noncoding | noncoding |
| MSTRG. 65959. 1  |              | XLOC_062566 | 288 coding  | noncoding | noncoding | noncoding |
| MSTRG. 65968. 1  |              | XLOC_062571 | 333 coding  | noncoding | noncoding | noncoding |
| MSTRG. 65981. 1  |              | XLOC_062577 | 235 coding  | noncoding | noncoding | noncoding |
| MSTRG. 65990. 1  |              | XLOC_062584 | 302 coding  | noncoding | noncoding | noncoding |
| MSTRG. 65997. 1  |              | XLOC_062587 | 224 coding  | noncoding | noncoding | noncoding |
| MSTRG. 66087. 1  |              | XLOC_062640 | 222 coding  | noncoding | noncoding | noncoding |
| MSTRG. 66104. 1  | PABPC4L      | XLOC_062644 | 277 coding  | noncoding | noncoding | noncoding |
| MSTRG. 66108. 1  | PABPC4L      | XLOC_062646 | 297 coding  | noncoding | noncoding | noncoding |
| MSTRG. 66123. 1  |              | XLOC_062659 | 650 coding  | noncoding | noncoding | noncoding |
| MSTRG. 66139. 1  |              | XLOC_062664 | 293 coding  | noncoding | noncoding | noncoding |
| MSTRG. 66161. 1  |              | XLOC_062673 | 251 coding  | noncoding | noncoding | noncoding |
| MSTRG. 66172. 1  |              | XLOC_062680 | 220 coding  | noncoding | noncoding | noncoding |
| MSTRG. 66206. 1  | LINC02511    | XLOC_062691 | 331 coding  | noncoding | noncoding | noncoding |
| MSTRG. 66217. 1  |              | XLOC_062706 | 264 coding  | noncoding | noncoding | noncoding |
| MSTRG. 66233. 1  |              | XLOC_062712 | 316 coding  | noncoding | noncoding | noncoding |
| MSTRG. 66261. 1  | SLC7A11-AS1  | XLOC_062717 | 289 coding  | noncoding | noncoding | noncoding |
| MSTRG. 66235. 1  |              | XLOC_062724 | 252 coding  | noncoding | noncoding | noncoding |
| MSTRG. 66325. 2  | ELF2         | XLOC_062757 | 2512 coding | coding    | coding    | coding    |
| MSTRG. 66279. 1  | MGARP        | XLOC_062763 | 253 coding  | noncoding | noncoding | noncoding |
| MSTRG. 66281. 1  |              | XLOC_062779 | 462 coding  | noncoding | noncoding | noncoding |
| MSTRG. 66456. 1  | RNF150       | XLOC_062823 | 303 coding  | noncoding | noncoding | noncoding |
| MSTRG. 66462. 1  | RNF150       | XLOC_062828 | 303 coding  | noncoding | noncoding | noncoding |
| MSTRG. 66564. 1  |              | XLOC_062851 | 234 coding  | noncoding | noncoding | noncoding |
| MSTRG. 66583. 1  | LINC02276    | XLOC_062869 | 286 coding  | noncoding | noncoding | noncoding |
| MSTRG. 66489. 1  |              | XLOC_062886 | 397 coding  | noncoding | noncoding | noncoding |
| MSTRG. 66879. 9  | INPP4B       | XLOC_062893 | 1096 coding | noncoding | noncoding | noncoding |
| MSTRG. 66500. 1  |              | XLOC_062898 | 215 coding  | noncoding | noncoding | noncoding |
| MSTRG. 66508. 1  | LOC107986194 | XLOC_062903 | 246 coding  | noncoding | noncoding | noncoding |
| MSTRG. 66509. 1  | LOC107986194 | XLOC_062904 | 222 coding  | noncoding | noncoding | noncoding |
| MSTRG. 66519. 1  |              | XLOC_062926 | 310 coding  | noncoding | noncoding | noncoding |
| NM_002039. 4     | GAB1         | XLOC_062930 | 7774 coding | coding    | coding    | coding    |
| MSTRG. 66767. 13 | GYPA         | XLOC_062956 | 1280 coding | coding    | noncoding | noncoding |
| MSTRG. 66767. 29 | GYPB         | XLOC_062956 | 1240 coding | coding    | noncoding | noncoding |
| MSTRG. 66715. 1  |              | XLOC_062960 | 301 coding  | noncoding | noncoding | noncoding |

|                 |              |             |             |           |           |           |
|-----------------|--------------|-------------|-------------|-----------|-----------|-----------|
| MSTRG. 66726. 1 | LOC105377462 | XLOC_062963 | 307 coding  | noncoding | noncoding | noncoding |
| NM_022475. 3    | HHIP         | XLOC_062965 | 9937 coding | coding    | coding    | coding    |
| MSTRG. 66806. 2 | OTUD4        | XLOC_062996 | 5284 coding | coding    | coding    | noncoding |
| MSTRG. 66790. 1 |              | XLOC_063000 | 306 coding  | noncoding | noncoding | noncoding |
| MSTRG. 66800. 1 |              | XLOC_063001 | 228 coding  | noncoding | noncoding | noncoding |
| NM_001354811. 1 | SMAD1        | XLOC_063002 | 3303 coding | coding    | coding    | coding    |
| XM_011531685. 2 | MMAA         | XLOC_063010 | 4768 coding | coding    | coding    | coding    |
| MSTRG. 66837. 1 |              | XLOC_063012 | 217 coding  | noncoding | noncoding | noncoding |
| MSTRG. 67009. 5 | SLC10A7      | XLOC_063034 | 707 coding  | coding    | noncoding | noncoding |
| MSTRG. 66976. 1 |              | XLOC_063048 | 225 coding  | noncoding | noncoding | noncoding |
| MSTRG. 66998. 1 | EDNRA        | XLOC_063051 | 222 coding  | noncoding | noncoding | noncoding |
| MSTRG. 67034. 1 |              | XLOC_063062 | 289 coding  | noncoding | noncoding | noncoding |
| MSTRG. 67422. 1 | ARHGAP10     | XLOC_063065 | 220 coding  | noncoding | noncoding | noncoding |
| MSTRG. 67424. 1 | ARHGAP10     | XLOC_063067 | 257 coding  | noncoding | noncoding | noncoding |
| MSTRG. 67430. 1 | ARHGAP10     | XLOC_063073 | 270 coding  | coding    | noncoding | noncoding |
| MSTRG. 67505. 1 | LOC107986195 | XLOC_063090 | 276 coding  | noncoding | noncoding | noncoding |
| MSTRG. 67532. 1 | LOC107986195 | XLOC_063094 | 250 coding  | noncoding | noncoding | noncoding |
| MSTRG. 67555. 1 | LOC107986195 | XLOC_063102 | 424 coding  | noncoding | noncoding | noncoding |
| MSTRG. 67067. 1 | IQCM         | XLOC_063110 | 237 coding  | noncoding | noncoding | noncoding |
| MSTRG. 67078. 1 | IQCM         | XLOC_063118 | 304 coding  | noncoding | noncoding | noncoding |
| MSTRG. 67083. 1 | IQCM         | XLOC_063122 | 207 coding  | noncoding | noncoding | noncoding |
| MSTRG. 67098. 1 | DCLK2        | XLOC_063136 | 291 coding  | noncoding | noncoding | noncoding |
| MSTRG. 67100. 1 |              | XLOC_063141 | 243 coding  | noncoding | noncoding | noncoding |
| NM_001267699. 1 | RPS3A        | XLOC_063146 | 1581 coding | coding    | noncoding | noncoding |
| MSTRG. 67135. 1 | SH3D19       | XLOC_063151 | 335 coding  | noncoding | noncoding | noncoding |
| MSTRG. 67136. 1 | SH3D19       | XLOC_063152 | 223 coding  | noncoding | noncoding | noncoding |
| MSTRG. 67120. 1 |              | XLOC_063158 | 264 coding  | noncoding | noncoding | noncoding |
| MSTRG. 67130. 1 |              | XLOC_063162 | 266 coding  | noncoding | noncoding | noncoding |
| MSTRG. 67194. 1 | FAM160A1     | XLOC_063167 | 314 coding  | noncoding | noncoding | noncoding |
| MSTRG. 67331. 4 | FBXW7-AS1    | XLOC_063195 | 4872 coding | coding    | coding    | noncoding |
| MSTRG. 67331. 7 | FBXW7-AS1    | XLOC_063195 | 3623 coding | coding    | noncoding | noncoding |
| MSTRG. 67311. 1 |              | XLOC_063240 | 257 coding  | noncoding | noncoding | noncoding |
| MSTRG. 67343. 1 | TRIM2        | XLOC_063245 | 261 coding  | noncoding | noncoding | noncoding |
| MSTRG. 67351. 1 | LOC105377496 | XLOC_063247 | 235 coding  | noncoding | noncoding | noncoding |
| MSTRG. 67320. 1 |              | XLOC_063257 | 273 coding  | noncoding | noncoding | noncoding |
| NM_003264. 5    | TLR2         | XLOC_063298 | 3581 coding | coding    | coding    | coding    |
| MSTRG. 67661. 1 |              | XLOC_063322 | 266 coding  | noncoding | noncoding | noncoding |
| XR_939389. 2    | LOC105377507 | XLOC_063341 | 4820 coding | noncoding | noncoding | noncoding |
| MSTRG. 67715. 1 |              | XLOC_063353 | 253 coding  | noncoding | noncoding | noncoding |
| MSTRG. 67809. 1 | TMEM144      | XLOC_063383 | 260 coding  | noncoding | noncoding | noncoding |
| MSTRG. 67793. 1 | LOC105377510 | XLOC_063387 | 324 coding  | noncoding | noncoding | noncoding |
| MSTRG. 67791. 1 |              | XLOC_063389 | 280 coding  | noncoding | coding    | noncoding |
| MSTRG. 67813. 1 |              | XLOC_063404 | 235 coding  | noncoding | noncoding | noncoding |

|                  |              |                   |             |           |           |           |
|------------------|--------------|-------------------|-------------|-----------|-----------|-----------|
| MSTRG. 67814. 1  |              | XLOC_063405       | 315 coding  | noncoding | noncoding | noncoding |
| MSTRG. 67835. 1  | FNIP2        | XLOC_063408       | 313 coding  | noncoding | noncoding | noncoding |
| NM_001351725. 1  | RAPGEF2      | XLOC_063413       | 7780 coding | coding    | coding    | coding    |
| MSTRG. 67868. 1  |              | XLOC_063477       | 231 coding  | noncoding | noncoding | noncoding |
| MSTRG. 67875. 1  |              | XLOC_063479       | 298 coding  | coding    | noncoding | noncoding |
| MSTRG. 67881. 1  |              | XLOC_063483       | 317 coding  | noncoding | noncoding | noncoding |
| MSTRG. 67886. 1  |              | XLOC_063485       | 215 coding  | noncoding | noncoding | noncoding |
| MSTRG. 67924. 1  | FSTL5        | XLOC_063497       | 277 coding  | noncoding | noncoding | noncoding |
| MSTRG. 67929. 1  | FSTL5        | XLOC_063498       | 272 coding  | noncoding | noncoding | noncoding |
| MSTRG. 67938. 1  | FSTL5        | XLOC_063504       | 314 coding  | noncoding | noncoding | noncoding |
| MSTRG. 67956. 1  |              | XLOC_063522       | 284 coding  | noncoding | noncoding | noncoding |
| MSTRG. 68131. 1  |              | 1-Mar XLOC_063556 | 214 coding  | coding    | noncoding | noncoding |
| MSTRG. 68013. 1  |              | XLOC_063568       | 272 coding  | noncoding | noncoding | noncoding |
| MSTRG. 68015. 1  |              | XLOC_063570       | 281 coding  | noncoding | noncoding | noncoding |
| MSTRG. 68028. 1  |              | XLOC_063580       | 248 coding  | noncoding | noncoding | noncoding |
| MSTRG. 68031. 1  |              | XLOC_063582       | 250 coding  | noncoding | noncoding | noncoding |
| MSTRG. 68047. 1  |              | XLOC_063592       | 238 coding  | noncoding | noncoding | noncoding |
| MSTRG. 68223. 1  |              | XLOC_063594       | 290 coding  | coding    | noncoding | noncoding |
| XM_017007674. 1  | KLHL2        | XLOC_063600       | 3078 coding | coding    | coding    | coding    |
| NM_001873. 4     | CPE          | XLOC_063634       | 2582 coding | coding    | coding    | coding    |
| MSTRG. 68159. 1  |              | XLOC_063638       | 254 coding  | noncoding | noncoding | noncoding |
| MSTRG. 68176. 1  | LOC101928131 | XLOC_063646       | 268 coding  | noncoding | noncoding | noncoding |
| XM_024454195. 1  | TLL1         | XLOC_063651       | 9033 coding | coding    | coding    | coding    |
| MSTRG. 68190. 1  | TLL1         | XLOC_063652       | 325 coding  | noncoding | noncoding | noncoding |
| MSTRG. 68200. 1  | TLL1         | XLOC_063656       | 288 coding  | noncoding | noncoding | noncoding |
| MSTRG. 68211. 1  |              | XLOC_063665       | 271 coding  | noncoding | noncoding | noncoding |
| MSTRG. 68285. 1  | SPOCK3       | XLOC_063671       | 303 coding  | noncoding | noncoding | noncoding |
| MSTRG. 68286. 1  | SPOCK3       | XLOC_063672       | 213 coding  | noncoding | noncoding | noncoding |
| XM_017007911. 1  | PALLD        | XLOC_063716       | 4146 coding | coding    | coding    | coding    |
| XM_024453939. 1  | PALLD        | XLOC_063716       | 6138 coding | coding    | coding    | coding    |
| MSTRG. 68337. 28 | CBR4         | XLOC_063716       | 244 coding  | coding    | noncoding | noncoding |
| MSTRG. 68340. 1  | PALLD        | XLOC_063717       | 263 coding  | noncoding | noncoding | noncoding |
| MSTRG. 68347. 1  | PALLD        | XLOC_063720       | 217 coding  | noncoding | noncoding | noncoding |
| MSTRG. 68315. 1  | LOC105377529 | XLOC_063744       | 385 coding  | noncoding | noncoding | noncoding |
| MSTRG. 68320. 1  |              | XLOC_063746       | 239 coding  | coding    | noncoding | noncoding |
| XM_011531586. 2  | CLCN3        | XLOC_063751       | 4151 coding | coding    | coding    | coding    |
| MSTRG. 68492. 1  | CLCN3        | XLOC_063752       | 224 coding  | noncoding | noncoding | noncoding |
| MSTRG. 68520. 6  | MFAP3L       | XLOC_063765       | 4535 coding | coding    | coding    | noncoding |
| MSTRG. 68520. 5  | MFAP3L       | XLOC_063765       | 4737 coding | coding    | coding    | noncoding |
| MSTRG. 68517. 1  |              | XLOC_063767       | 316 coding  | coding    | noncoding | noncoding |
| MSTRG. 68532. 1  |              | XLOC_063777       | 301 coding  | noncoding | noncoding | noncoding |
| MSTRG. 68536. 1  |              | XLOC_063780       | 282 coding  | coding    | noncoding | noncoding |
| MSTRG. 68538. 1  |              | XLOC_063782       | 226 coding  | noncoding | noncoding | noncoding |

|                 |              |             |             |           |           |           |
|-----------------|--------------|-------------|-------------|-----------|-----------|-----------|
| MSTRG. 68545. 1 |              | XLOC_063785 | 249 coding  | noncoding | noncoding | noncoding |
| MSTRG. 68554. 1 |              | XLOC_063793 | 244 coding  | noncoding | noncoding | noncoding |
| MSTRG. 68565. 1 |              | XLOC_063798 | 270 coding  | noncoding | noncoding | noncoding |
| XM_017008243. 2 | GALNTL6      | XLOC_063799 | 2739 coding | coding    | coding    | coding    |
| MSTRG. 68596. 1 | GALNTL6      | XLOC_063803 | 307 coding  | noncoding | noncoding | noncoding |
| MSTRG. 68604. 1 | GALNTL6      | XLOC_063808 | 283 coding  | noncoding | noncoding | noncoding |
| MSTRG. 68626. 1 | GALNTL6      | XLOC_063816 | 278 coding  | noncoding | noncoding | noncoding |
| MSTRG. 68715. 1 | SCRG1        | XLOC_063866 | 216 coding  | noncoding | noncoding | noncoding |
| MSTRG. 68669. 1 |              | XLOC_063875 | 477 coding  | coding    | noncoding | noncoding |
| MSTRG. 68672. 1 |              | XLOC_063877 | 301 coding  | noncoding | noncoding | noncoding |
| MSTRG. 68741. 1 |              | XLOC_063891 | 266 coding  | noncoding | noncoding | noncoding |
| MSTRG. 68752. 1 |              | XLOC_063899 | 212 coding  | noncoding | noncoding | noncoding |
| MSTRG. 68756. 1 |              | XLOC_063904 | 289 coding  | noncoding | noncoding | noncoding |
| MSTRG. 68820. 1 | GPM6A        | XLOC_063925 | 288 coding  | noncoding | noncoding | noncoding |
| MSTRG. 68890. 1 |              | XLOC_063961 | 299 coding  | noncoding | noncoding | noncoding |
| MSTRG. 68911. 1 | NEIL3        | XLOC_063971 | 294 coding  | noncoding | noncoding | noncoding |
| MSTRG. 68952. 1 |              | XLOC_063985 | 272 coding  | noncoding | noncoding | noncoding |
| MSTRG. 69004. 1 |              | XLOC_064003 | 275 coding  | noncoding | noncoding | noncoding |
| MSTRG. 69030. 1 |              | XLOC_064013 | 271 coding  | noncoding | noncoding | noncoding |
| MSTRG. 69037. 1 |              | XLOC_064019 | 363 coding  | noncoding | noncoding | noncoding |
| MSTRG. 69060. 1 | LOC105377567 | XLOC_064024 | 322 coding  | noncoding | noncoding | noncoding |
| MSTRG. 69046. 1 |              | XLOC_064035 | 312 coding  | noncoding | noncoding | noncoding |
| MSTRG. 69082. 1 |              | XLOC_064040 | 286 coding  | noncoding | noncoding | noncoding |
| MSTRG. 69131. 1 | TEMN3-AS1    | XLOC_064053 | 410 coding  | noncoding | noncoding | noncoding |
| MSTRG. 69144. 1 | TENM3        | XLOC_064059 | 292 coding  | noncoding | noncoding | noncoding |
| MSTRG. 69151. 1 | TENM3        | XLOC_064062 | 254 coding  | noncoding | noncoding | noncoding |
| MSTRG. 69156. 1 | TENM3        | XLOC_064065 | 323 coding  | noncoding | noncoding | noncoding |
| MSTRG. 69172. 1 | TENM3        | XLOC_064070 | 226 coding  | noncoding | noncoding | noncoding |
| MSTRG. 69184. 1 | TENM3        | XLOC_064075 | 614 coding  | noncoding | noncoding | noncoding |
| MSTRG. 69101. 1 |              | XLOC_064089 | 535 coding  | noncoding | noncoding | noncoding |
| MSTRG. 69112. 1 | LOC105377578 | XLOC_064094 | 217 coding  | noncoding | noncoding | noncoding |
| MSTRG. 69242. 1 | WWC2         | XLOC_064100 | 291 coding  | noncoding | noncoding | noncoding |
| MSTRG. 69247. 1 | WWC2         | XLOC_064102 | 200 coding  | noncoding | noncoding | noncoding |
| MSTRG. 69205. 1 |              | XLOC_064109 | 220 coding  | noncoding | noncoding | noncoding |
| MSTRG. 69317. 1 | STOX2        | XLOC_064148 | 270 coding  | noncoding | noncoding | noncoding |
| MSTRG. 69297. 1 | ENPP6        | XLOC_064153 | 263 coding  | noncoding | noncoding | noncoding |
| MSTRG. 69402. 1 | PRIMPOL      | XLOC_064181 | 309 coding  | noncoding | noncoding | noncoding |
| MSTRG. 69410. 1 |              | XLOC_064195 | 236 coding  | noncoding | noncoding | noncoding |
| MSTRG. 69416. 1 |              | XLOC_064200 | 225 coding  | noncoding | noncoding | noncoding |
| MSTRG. 69425. 1 |              | XLOC_064203 | 313 coding  | noncoding | noncoding | noncoding |
| MSTRG. 69438. 1 |              | XLOC_064217 | 299 coding  | noncoding | noncoding | noncoding |
| MSTRG. 69486. 1 | SORBS2       | XLOC_064233 | 307 coding  | noncoding | noncoding | noncoding |
| NM_001367768. 2 | FAM149A      | XLOC_064240 | 5968 coding | coding    | coding    | coding    |

|                 |              |             |             |           |           |           |
|-----------------|--------------|-------------|-------------|-----------|-----------|-----------|
| MSTRG. 69576. 1 | KLKB1        | XLOC_064249 | 315 coding  | noncoding | noncoding | noncoding |
| MSTRG. 69544. 1 | LOC105377596 | XLOC_064256 | 247 coding  | noncoding | noncoding | noncoding |
| MSTRG. 69629. 1 |              | XLOC_064321 | 302 coding  | noncoding | noncoding | noncoding |
| MSTRG. 69637. 1 |              | XLOC_064325 | 277 coding  | noncoding | noncoding | noncoding |
| MSTRG. 69638. 1 |              | XLOC_064327 | 294 coding  | noncoding | noncoding | noncoding |
| MSTRG. 69646. 1 |              | XLOC_064332 | 242 coding  | noncoding | noncoding | noncoding |
| MSTRG. 69659. 1 | LINC01060    | XLOC_064337 | 309 coding  | noncoding | noncoding | noncoding |
| MSTRG. 69715. 1 |              | XLOC_064344 | 301 coding  | noncoding | noncoding | noncoding |
| MSTRG. 69731. 1 |              | XLOC_064352 | 288 coding  | noncoding | noncoding | noncoding |
| MSTRG. 69742. 1 |              | XLOC_064357 | 280 coding  | noncoding | noncoding | noncoding |
| MSTRG. 69745. 1 |              | XLOC_064358 | 264 coding  | noncoding | noncoding | noncoding |
| MSTRG. 56110. 1 | ZNF718       | XLOC_064377 | 445 coding  | coding    | noncoding | noncoding |
| MSTRG. 56110. 7 | ZNF718       | XLOC_064377 | 448 coding  | coding    | noncoding | noncoding |
| MSTRG. 56090. 1 |              | XLOC_064399 | 390 coding  | noncoding | noncoding | noncoding |
| MSTRG. 56095. 1 |              | XLOC_064401 | 736 coding  | noncoding | noncoding | noncoding |
| MSTRG. 56151. 1 | ABCA11P      | XLOC_064411 | 309 coding  | noncoding | noncoding | noncoding |
| MSTRG. 56146. 1 | LOC107986245 | XLOC_064427 | 227 coding  | noncoding | noncoding | noncoding |
| MSTRG. 56194. 8 | LOC107986211 | XLOC_064428 | 3312 coding | coding    | noncoding | noncoding |
| MSTRG. 56201. 1 |              | XLOC_064430 | 352 coding  | noncoding | noncoding | noncoding |
| MSTRG. 56203. 1 | LOC100129917 | XLOC_064431 | 241 coding  | noncoding | noncoding | noncoding |
| MSTRG. 56189. 1 |              | XLOC_064434 | 322 coding  | noncoding | noncoding | noncoding |
| NM_001128325. 2 | SPON2        | XLOC_064468 | 1807 coding | coding    | coding    | coding    |
| MSTRG. 56295. 1 | NKX1-1       | XLOC_064501 | 249 coding  | noncoding | noncoding | noncoding |
| MSTRG. 56303. 1 | FAM53A       | XLOC_064507 | 237 coding  | noncoding | noncoding | noncoding |
| MSTRG. 56346. 1 | LETM1        | XLOC_064513 | 227 coding  | noncoding | noncoding | noncoding |
| MSTRG. 56368. 6 | NSD2         | XLOC_064518 | 927 coding  | coding    | noncoding | coding    |
| MSTRG. 56390. 1 | NELFA        | XLOC_064530 | 301 coding  | noncoding | noncoding | noncoding |
| MSTRG. 56359. 1 | POLN         | XLOC_064539 | 247 coding  | noncoding | noncoding | noncoding |
| MSTRG. 56444. 1 | LOC105374353 | XLOC_064551 | 286 coding  | noncoding | noncoding | noncoding |
| MSTRG. 56445. 2 | FAM193A      | XLOC_064552 | 2443 coding | coding    | coding    | coding    |
| MSTRG. 56437. 1 |              | XLOC_064562 | 271 coding  | noncoding | noncoding | noncoding |
| MSTRG. 56485. 2 | ADD1         | XLOC_064567 | 3340 coding | coding    | coding    | coding    |
| MSTRG. 56501. 1 | GRK4         | XLOC_064574 | 265 coding  | coding    | noncoding | noncoding |
| MSTRG. 56582. 1 |              | XLOC_064619 | 311 coding  | noncoding | noncoding | noncoding |
| MSTRG. 56586. 1 |              | XLOC_064621 | 293 coding  | noncoding | noncoding | noncoding |
| MSTRG. 56612. 1 | LYAR         | XLOC_064625 | 219 coding  | noncoding | noncoding | noncoding |
| XM_011513505. 1 | LYAR         | XLOC_064626 | 1871 coding | coding    | coding    | coding    |
| MSTRG. 56618. 3 | ZBTB49       | XLOC_064629 | 519 coding  | coding    | noncoding | noncoding |
| MSTRG. 56608. 1 |              | XLOC_064636 | 570 coding  | noncoding | noncoding | noncoding |
| MSTRG. 56642. 1 |              | XLOC_064710 | 455 coding  | noncoding | noncoding | noncoding |
| MSTRG. 56649. 1 | LOC101928306 | XLOC_064713 | 283 coding  | noncoding | noncoding | noncoding |
| MSTRG. 56653. 1 |              | XLOC_064719 | 303 coding  | noncoding | noncoding | noncoding |
| MSTRG. 56693. 1 | STK32B       | XLOC_064737 | 321 coding  | noncoding | noncoding | noncoding |

|                 |              |             |             |           |           |           |
|-----------------|--------------|-------------|-------------|-----------|-----------|-----------|
| MSTRG. 56713. 1 | EVC          | XLOC_064745 | 357 coding  | noncoding | noncoding | noncoding |
| MSTRG. 56742. 1 | PPP2R2C      | XLOC_064774 | 272 coding  | noncoding | noncoding | noncoding |
| MSTRG. 56875. 1 |              | XLOC_064790 | 481 coding  | coding    | coding    | noncoding |
| MSTRG. 56900. 1 |              | XLOC_064808 | 369 coding  | noncoding | noncoding | noncoding |
| MSTRG. 56930. 1 |              | XLOC_064817 | 261 coding  | noncoding | noncoding | noncoding |
| MSTRG. 56932. 1 |              | XLOC_064818 | 281 coding  | noncoding | noncoding | noncoding |
| MSTRG. 56945. 1 |              | XLOC_064821 | 303 coding  | noncoding | noncoding | noncoding |
| MSTRG. 56972. 1 | SORCS2       | XLOC_064822 | 251 coding  | noncoding | noncoding | noncoding |
| NM_001085382. 2 | PSAPL1       | XLOC_064828 | 4646 coding | coding    | coding    | coding    |
| MSTRG. 57035. 1 |              | XLOC_064858 | 272 coding  | noncoding | noncoding | noncoding |
| MSTRG. 57148. 1 | ACOX3        | XLOC_064873 | 260 coding  | noncoding | noncoding | noncoding |
| MSTRG. 57082. 1 |              | XLOC_064885 | 281 coding  | noncoding | noncoding | noncoding |
| MSTRG. 57092. 1 |              | XLOC_064891 | 266 coding  | noncoding | noncoding | noncoding |
| MSTRG. 57111. 1 | LOC105369250 | XLOC_064896 | 328 coding  | noncoding | noncoding | noncoding |
| MSTRG. 57100. 1 |              | XLOC_064898 | 250 coding  | noncoding | noncoding | noncoding |
| MSTRG. 57164. 1 |              | XLOC_064902 | 280 coding  | noncoding | noncoding | noncoding |
| MSTRG. 57163. 1 |              | XLOC_064903 | 242 coding  | noncoding | noncoding | noncoding |
| XM_024454265. 1 | ZNF518B      | XLOC_064982 | 9777 coding | noncoding | coding    | coding    |
| MSTRG. 57264. 1 | LOC105374481 | XLOC_064985 | 253 coding  | noncoding | noncoding | noncoding |
| MSTRG. 57265. 1 | LOC105374481 | XLOC_064986 | 321 coding  | noncoding | noncoding | noncoding |
| MSTRG. 57247. 1 | LINC02498    | XLOC_064992 | 270 coding  | noncoding | noncoding | noncoding |
| MSTRG. 57405. 1 | LOC105374483 | XLOC_065079 | 200 coding  | noncoding | noncoding | noncoding |
| MSTRG. 57408. 1 |              | XLOC_065082 | 205 coding  | noncoding | noncoding | noncoding |
| MSTRG. 57410. 1 |              | XLOC_065084 | 363 coding  | noncoding | noncoding | noncoding |
| MSTRG. 57418. 1 |              | XLOC_065089 | 291 coding  | noncoding | noncoding | noncoding |
| MSTRG. 57466. 1 |              | XLOC_065095 | 297 coding  | noncoding | noncoding | noncoding |
| MSTRG. 57488. 1 |              | XLOC_065104 | 320 coding  | noncoding | noncoding | noncoding |
| MSTRG. 57505. 1 | LINC01182    | XLOC_065146 | 280 coding  | noncoding | noncoding | noncoding |
| MSTRG. 57507. 1 | LINC01182    | XLOC_065147 | 273 coding  | noncoding | noncoding | noncoding |
| MSTRG. 57523. 1 | LOC107986182 | XLOC_065153 | 227 coding  | noncoding | noncoding | noncoding |
| MSTRG. 57538. 1 |              | XLOC_065172 | 222 coding  | noncoding | noncoding | noncoding |
| NR_126435. 1    | LINC00504    | XLOC_065175 | 4672 coding | coding    | coding    | coding    |
| XM_006713959. 3 | FBXL5        | XLOC_065241 | 3014 coding | coding    | coding    | coding    |
| MSTRG. 57745. 1 |              | XLOC_065302 | 239 coding  | noncoding | noncoding | noncoding |
| MSTRG. 57805. 1 |              | XLOC_065319 | 235 coding  | noncoding | noncoding | noncoding |
| MSTRG. 58049. 1 | LCORL        | XLOC_065353 | 620 coding  | noncoding | noncoding | noncoding |
| MSTRG. 57916. 1 | LOC107986262 | XLOC_065373 | 258 coding  | noncoding | noncoding | noncoding |
| MSTRG. 57962. 1 |              | XLOC_065399 | 275 coding  | noncoding | noncoding | noncoding |
| MSTRG. 58006. 1 | LOC105374515 | XLOC_065428 | 388 coding  | noncoding | noncoding | noncoding |
| MSTRG. 58007. 1 |              | XLOC_065429 | 322 coding  | noncoding | noncoding | noncoding |
| MSTRG. 58207. 1 | KCNIP4       | XLOC_065458 | 586 coding  | noncoding | noncoding | noncoding |
| MSTRG. 58074. 1 |              | XLOC_065464 | 289 coding  | noncoding | noncoding | noncoding |
| MSTRG. 58076. 1 |              | XLOC_065466 | 241 coding  | noncoding | noncoding | noncoding |

|                  |              |             |              |           |           |           |
|------------------|--------------|-------------|--------------|-----------|-----------|-----------|
| MSTRG. 58077. 1  |              | XLOC_065467 | 324 coding   | noncoding | noncoding | noncoding |
| MSTRG. 58091. 1  |              | XLOC_065479 | 261 coding   | noncoding | noncoding | noncoding |
| MSTRG. 58152. 1  | LOC105374524 | XLOC_065501 | 263 coding   | noncoding | noncoding | noncoding |
| MSTRG. 58230. 1  | PPARGC1A     | XLOC_065519 | 316 coding   | noncoding | noncoding | noncoding |
| MSTRG. 58390. 1  |              | XLOC_065590 | 256 coding   | noncoding | noncoding | noncoding |
| MSTRG. 58421. 1  |              | XLOC_065610 | 259 coding   | noncoding | noncoding | noncoding |
| MSTRG. 58467. 1  | RBPJ         | XLOC_065618 | 289 coding   | noncoding | noncoding | noncoding |
| MSTRG. 58476. 1  | RBPJ         | XLOC_065621 | 355 coding   | noncoding | noncoding | noncoding |
| MSTRG. 58633. 1  |              | XLOC_065661 | 210 coding   | noncoding | noncoding | noncoding |
| MSTRG. 58644. 1  |              | XLOC_065667 | 333 coding   | noncoding | noncoding | noncoding |
| MSTRG. 58649. 1  | LOC105374548 | XLOC_065670 | 308 coding   | noncoding | noncoding | noncoding |
| MSTRG. 58801. 1  | PCDH7        | XLOC_065728 | 291 coding   | coding    | noncoding | noncoding |
| MSTRG. 58773. 1  |              | XLOC_065739 | 287 coding   | noncoding | noncoding | noncoding |
| MSTRG. 58778. 1  |              | XLOC_065742 | 288 coding   | noncoding | noncoding | noncoding |
| MSTRG. 58798. 1  | LINC02501    | XLOC_065749 | 280 coding   | noncoding | noncoding | noncoding |
| MSTRG. 58841. 1  |              | XLOC_065760 | 256 coding   | noncoding | noncoding | noncoding |
| MSTRG. 58860. 1  |              | XLOC_065767 | 307 coding   | noncoding | noncoding | noncoding |
| MSTRG. 58900. 1  |              | XLOC_065779 | 233 coding   | noncoding | noncoding | noncoding |
| MSTRG. 58915. 1  | LINC02484    | XLOC_065785 | 282 coding   | noncoding | noncoding | noncoding |
| MSTRG. 58917. 1  | LINC02484    | XLOC_065786 | 324 coding   | noncoding | noncoding | noncoding |
| MSTRG. 58920. 1  | LINC02484    | XLOC_065787 | 283 coding   | noncoding | noncoding | noncoding |
| MSTRG. 59107. 8  | DTHD1        | XLOC_065848 | 6113 coding  | coding    | coding    | noncoding |
| MSTRG. 59069. 1  |              | XLOC_065856 | 330 coding   | noncoding | noncoding | noncoding |
| MSTRG. 59124. 1  | LOC101928721 | XLOC_065873 | 459 coding   | noncoding | noncoding | noncoding |
| MSTRG. 59122. 1  |              | XLOC_065875 | 219 coding   | noncoding | noncoding | noncoding |
| MSTRG. 59207. 1  | RELL1        | XLOC_065890 | 251 coding   | noncoding | noncoding | noncoding |
| MSTRG. 59229. 1  |              | XLOC_065924 | 297 coding   | noncoding | noncoding | noncoding |
| MSTRG. 59236. 1  | LINC01258    | XLOC_065928 | 289 coding   | noncoding | noncoding | noncoding |
| MSTRG. 59264. 1  | KLF3-AS1     | XLOC_065934 | 11427 coding | coding    | coding    | noncoding |
| MSTRG. 59253. 1  |              | XLOC_065935 | 377 coding   | noncoding | noncoding | noncoding |
| MSTRG. 59391. 1  | KLHL5        | XLOC_065964 | 1274 coding  | noncoding | noncoding | noncoding |
| MSTRG. 59428. 1  | UGDH         | XLOC_065978 | 274 coding   | noncoding | noncoding | noncoding |
| NM_001317897. 2  | SMIM14       | XLOC_065983 | 6263 coding  | coding    | coding    | noncoding |
| MSTRG. 59438. 6  | UBE2K        | XLOC_065984 | 677 coding   | coding    | noncoding | noncoding |
| MSTRG. 59438. 10 | UBE2K        | XLOC_065984 | 2094 coding  | coding    | noncoding | noncoding |
| MSTRG. 59470. 1  | PDS5A        | XLOC_066001 | 248 coding   | noncoding | noncoding | noncoding |
| MSTRG. 59499. 1  | N4BP2        | XLOC_066011 | 299 coding   | noncoding | noncoding | noncoding |
| MSTRG. 59506. 2  | RHOH         | XLOC_066016 | 2406 coding  | coding    | coding    | coding    |
| MSTRG. 59472. 1  |              | XLOC_066021 | 437 coding   | noncoding | noncoding | noncoding |
| MSTRG. 59474. 1  |              | XLOC_066022 | 211 coding   | noncoding | noncoding | noncoding |
| MSTRG. 59483. 1  |              | XLOC_066027 | 276 coding   | noncoding | noncoding | noncoding |
| XM_005248103. 4  | RBM47        | XLOC_066028 | 4884 coding  | coding    | coding    | coding    |
| XM_017008304. 2  | RBM47        | XLOC_066028 | 6019 coding  | coding    | coding    | coding    |

|                |              |             |              |           |           |           |
|----------------|--------------|-------------|--------------|-----------|-----------|-----------|
| XM_011513708.2 | RBM47        | XLOC_066028 | 3701 coding  | coding    | coding    | coding    |
| MSTRG.59525.1  |              | XLOC_066050 | 280 coding   | noncoding | noncoding | noncoding |
| XR_001741664.1 | LOC107986273 | XLOC_066058 | 4566 coding  | noncoding | noncoding | noncoding |
| MSTRG.59594.1  | APBB2        | XLOC_066065 | 215 coding   | coding    | noncoding | noncoding |
| MSTRG.59630.1  | LIMCH1       | XLOC_066083 | 246 coding   | noncoding | noncoding | noncoding |
| MSTRG.59605.1  | LOC105374425 | XLOC_066089 | 395 coding   | noncoding | noncoding | noncoding |
| MSTRG.59675.1  |              | XLOC_066118 | 228 coding   | noncoding | noncoding | noncoding |
| MSTRG.59816.1  | ATP8A1       | XLOC_066129 | 300 coding   | noncoding | noncoding | noncoding |
| MSTRG.59707.1  |              | XLOC_066168 | 253 coding   | noncoding | noncoding | noncoding |
| MSTRG.59709.1  |              | XLOC_066171 | 275 coding   | noncoding | noncoding | noncoding |
| MSTRG.59735.1  |              | XLOC_066184 | 256 coding   | noncoding | noncoding | noncoding |
| MSTRG.59738.1  |              | XLOC_066185 | 292 coding   | noncoding | noncoding | noncoding |
| MSTRG.59752.1  | LOC105374438 | XLOC_066192 | 278 coding   | noncoding | noncoding | noncoding |
| XM_011513690.3 | KCTD8        | XLOC_066197 | 3662 coding  | coding    | coding    | coding    |
| MSTRG.59758.1  |              | XLOC_066204 | 336 coding   | noncoding | noncoding | noncoding |
| XM_011513679.2 | YIPF7        | XLOC_066207 | 9037 coding  | coding    | coding    | coding    |
| MSTRG.59855.1  |              | XLOC_066225 | 267 coding   | noncoding | noncoding | noncoding |
| MSTRG.59857.1  |              | XLOC_066227 | 299 coding   | noncoding | noncoding | noncoding |
| MSTRG.59868.1  |              | XLOC_066232 | 284 coding   | noncoding | noncoding | noncoding |
| MSTRG.60094.1  | CNGA1        | XLOC_066287 | 241 coding   | noncoding | noncoding | noncoding |
| MSTRG.60016.1  | TXK          | XLOC_066311 | 355 coding   | noncoding | noncoding | noncoding |
| MSTRG.60021.1  | TEC          | XLOC_066316 | 289 coding   | noncoding | noncoding | noncoding |
| MSTRG.59973.1  |              | XLOC_066338 | 362 coding   | noncoding | noncoding | noncoding |
| XM_011513682.3 | FRYL         | XLOC_066343 | 11747 coding | coding    | coding    | coding    |
| XM_011513681.3 | FRYL         | XLOC_066343 | 11793 coding | coding    | coding    | coding    |
| MSTRG.60249.1  | FRYL         | XLOC_066354 | 255 coding   | noncoding | noncoding | noncoding |
| MSTRG.60189.3  | DCUN1D4      | XLOC_066424 | 1634 coding  | coding    | noncoding | noncoding |
| MSTRG.60520.1  | SCFD2        | XLOC_066464 | 280 coding   | noncoding | noncoding | noncoding |
| MSTRG.60544.1  | SCFD2        | XLOC_066488 | 377 coding   | coding    | noncoding | noncoding |
| MSTRG.60548.5  | FIP1L1       | XLOC_066490 | 1951 coding  | coding    | coding    | coding    |
| MSTRG.60304.1  |              | XLOC_066499 | 319 coding   | noncoding | noncoding | noncoding |
| MSTRG.60307.1  |              | XLOC_066500 | 229 coding   | noncoding | noncoding | noncoding |
| MSTRG.60339.1  |              | XLOC_066506 | 250 coding   | noncoding | noncoding | noncoding |
| MSTRG.60346.1  |              | XLOC_066537 | 272 coding   | noncoding | noncoding | noncoding |
| MSTRG.60351.1  |              | XLOC_066539 | 257 coding   | noncoding | noncoding | noncoding |
| MSTRG.60360.1  | PDGFRA       | XLOC_066540 | 268 coding   | noncoding | noncoding | noncoding |
| MSTRG.60361.1  | PDGFRA       | XLOC_066541 | 586 coding   | coding    | noncoding | noncoding |
| MSTRG.60357.1  |              | XLOC_066546 | 348 coding   | noncoding | noncoding | noncoding |
| MSTRG.60432.1  | KIT          | XLOC_066557 | 219 coding   | noncoding | noncoding | noncoding |
| MSTRG.60423.1  | LOC105377657 | XLOC_066567 | 259 coding   | noncoding | noncoding | noncoding |
| MSTRG.60444.1  |              | XLOC_066574 | 322 coding   | noncoding | noncoding | noncoding |
| NM_002253.3    | KDR          | XLOC_066576 | 5833 coding  | coding    | coding    | coding    |
| MSTRG.60467.2  | SRD5A3       | XLOC_066586 | 327 coding   | noncoding | coding    | noncoding |

|                 |              |             |             |           |           |           |
|-----------------|--------------|-------------|-------------|-----------|-----------|-----------|
| MSTRG. 60482. 7 | CLOCK        | XLOC_066590 | 7571 coding | coding    | coding    | coding    |
| MSTRG. 60475. 1 | PDCL2        | XLOC_066593 | 361 coding  | noncoding | noncoding | noncoding |
| MSTRG. 60478. 1 |              | XLOC_066595 | 293 coding  | coding    | noncoding | noncoding |
| MSTRG. 60506. 1 | KIAA1211     | XLOC_066609 | 252 coding  | noncoding | noncoding | noncoding |
| XM_017007740. 2 | AASDH        | XLOC_066612 | 4620 coding | coding    | coding    | coding    |
| MSTRG. 60665. 1 | LOC100506514 | XLOC_066617 | 286 coding  | noncoding | noncoding | noncoding |
| NM_001145460. 1 | HOPX         | XLOC_066625 | 1673 coding | noncoding | coding    | coding    |
| MSTRG. 60622. 1 |              | XLOC_066634 | 213 coding  | noncoding | noncoding | noncoding |
| MSTRG. 60628. 1 |              | XLOC_066635 | 293 coding  | noncoding | noncoding | noncoding |
| MSTRG. 60629. 1 |              | XLOC_066636 | 283 coding  | noncoding | noncoding | noncoding |
| MSTRG. 60649. 1 |              | XLOC_066651 | 215 coding  | coding    | noncoding | noncoding |
| MSTRG. 60687. 1 |              | XLOC_066656 | 478 coding  | noncoding | noncoding | noncoding |
| MSTRG. 60695. 1 |              | XLOC_066665 | 297 coding  | noncoding | noncoding | noncoding |
| MSTRG. 60699. 1 |              | XLOC_066666 | 228 coding  | noncoding | noncoding | noncoding |
| MSTRG. 60735. 1 |              | XLOC_066681 | 269 coding  | noncoding | noncoding | noncoding |
| MSTRG. 60740. 1 |              | XLOC_066684 | 386 coding  | noncoding | noncoding | noncoding |
| MSTRG. 60749. 1 |              | XLOC_066689 | 283 coding  | noncoding | noncoding | noncoding |
| MSTRG. 60767. 1 |              | XLOC_066699 | 306 coding  | noncoding | noncoding | noncoding |
| MSTRG. 60785. 1 |              | XLOC_066710 | 265 coding  | noncoding | noncoding | noncoding |
| MSTRG. 60801. 1 |              | XLOC_066718 | 251 coding  | noncoding | coding    | noncoding |
| MSTRG. 60802. 1 |              | XLOC_066719 | 289 coding  | noncoding | noncoding | noncoding |
| MSTRG. 60804. 1 | LINC02496    | XLOC_066720 | 302 coding  | noncoding | noncoding | noncoding |
| MSTRG. 60807. 1 |              | XLOC_066722 | 294 coding  | noncoding | coding    | noncoding |
| MSTRG. 60813. 1 |              | XLOC_066726 | 281 coding  | noncoding | coding    | noncoding |
| MSTRG. 60887. 1 | ADGRL3-AS1   | XLOC_066740 | 241 coding  | noncoding | noncoding | noncoding |
| MSTRG. 60826. 1 |              | XLOC_066742 | 309 coding  | noncoding | noncoding | noncoding |
| MSTRG. 60829. 1 |              | XLOC_066744 | 319 coding  | noncoding | noncoding | noncoding |
| MSTRG. 60832. 1 |              | XLOC_066747 | 306 coding  | noncoding | noncoding | noncoding |
| MSTRG. 60855. 1 |              | XLOC_066759 | 255 coding  | noncoding | noncoding | noncoding |
| XR_938815. 2    | LOC105377253 | XLOC_066761 | 4617 coding | noncoding | noncoding | noncoding |
| MSTRG. 60897. 1 |              | XLOC_066764 | 232 coding  | noncoding | noncoding | noncoding |
| MSTRG. 60892. 1 |              | XLOC_066767 | 301 coding  | coding    | noncoding | noncoding |
| MSTRG. 60914. 1 |              | XLOC_066774 | 338 coding  | noncoding | noncoding | noncoding |
| MSTRG. 60915. 1 |              | XLOC_066775 | 261 coding  | noncoding | noncoding | noncoding |
| MSTRG. 60919. 1 |              | XLOC_066776 | 257 coding  | noncoding | noncoding | noncoding |
| MSTRG. 60923. 1 |              | XLOC_066778 | 244 coding  | noncoding | noncoding | noncoding |
| MSTRG. 60926. 1 |              | XLOC_066779 | 293 coding  | noncoding | noncoding | noncoding |
| MSTRG. 60948. 1 | LOC107986284 | XLOC_066791 | 288 coding  | noncoding | noncoding | noncoding |
| MSTRG. 60950. 1 | LOC107986284 | XLOC_066793 | 235 coding  | noncoding | noncoding | noncoding |
| NR_033976. 1    | LINC02232    | XLOC_066795 | 4079 coding | noncoding | noncoding | noncoding |
| MSTRG. 60967. 1 |              | XLOC_066807 | 286 coding  | noncoding | noncoding | noncoding |
| MSTRG. 60970. 1 |              | XLOC_066809 | 288 coding  | noncoding | noncoding | noncoding |
| MSTRG. 61021. 1 | LOC105377262 | XLOC_066827 | 269 coding  | noncoding | noncoding | noncoding |

|                  |              |             |             |           |           |           |
|------------------|--------------|-------------|-------------|-----------|-----------|-----------|
| MSTRG. 61019. 1  |              | XLOC_066834 | 346 coding  | noncoding | noncoding | noncoding |
| MSTRG. 61034. 1  |              | XLOC_066835 | 224 coding  | noncoding | noncoding | noncoding |
| MSTRG. 61036. 1  |              | XLOC_066836 | 265 coding  | noncoding | noncoding | noncoding |
| MSTRG. 61064. 1  | CENPC        | XLOC_066854 | 430 coding  | noncoding | noncoding | noncoding |
| MSTRG. 61162. 1  |              | XLOC_066891 | 283 coding  | coding    | noncoding | noncoding |
| NM_001031732. 4  | YTHDC1       | XLOC_066938 | 6233 coding | coding    | coding    | coding    |
| XR_001741714. 1  | LOC105377265 | XLOC_066949 | 4109 coding | coding    | coding    | noncoding |
| MSTRG. 61208. 1  |              | XLOC_066962 | 244 coding  | noncoding | noncoding | noncoding |
| MSTRG. 61209. 1  |              | XLOC_066963 | 253 coding  | noncoding | noncoding | noncoding |
| MSTRG. 61274. 1  | SMR3B        | XLOC_066987 | 232 coding  | noncoding | noncoding | noncoding |
| MSTRG. 61302. 1  |              | XLOC_067004 | 255 coding  | noncoding | noncoding | noncoding |
| MSTRG. 61395. 1  | SLC4A4       | XLOC_067014 | 266 coding  | noncoding | noncoding | noncoding |
| MSTRG. 61372. 1  | ADAMTS3      | XLOC_067053 | 316 coding  | noncoding | noncoding | noncoding |
| MSTRG. 61375. 1  | ADAMTS3      | XLOC_067055 | 259 coding  | noncoding | noncoding | noncoding |
| MSTRG. 61359. 1  |              | XLOC_067060 | 289 coding  | noncoding | noncoding | noncoding |
| MSTRG. 61362. 1  |              | XLOC_067062 | 244 coding  | noncoding | noncoding | noncoding |
| MSTRG. 61384. 1  |              | XLOC_067066 | 667 coding  | noncoding | noncoding | noncoding |
| MSTRG. 61668. 1  | LOC102724832 | XLOC_067099 | 553 coding  | noncoding | noncoding | noncoding |
| XM_017007838. 1  | RASSF6       | XLOC_067107 | 3323 coding | noncoding | coding    | coding    |
| MSTRG. 61455. 1  |              | XLOC_067108 | 402 coding  | noncoding | noncoding | noncoding |
| MSTRG. 61483. 1  |              | XLOC_067114 | 250 coding  | noncoding | noncoding | noncoding |
| NM_001363352. 1  | PF4          | XLOC_067118 | 1061 coding | coding    | noncoding | noncoding |
| MSTRG. 61489. 1  |              | XLOC_067126 | 277 coding  | noncoding | noncoding | noncoding |
| MSTRG. 61516. 1  |              | XLOC_067168 | 393 coding  | noncoding | noncoding | noncoding |
| NM_001729. 4     | BTC          | XLOC_067175 | 2653 coding | noncoding | noncoding | coding    |
| MSTRG. 61535. 1  | LOC105377282 | XLOC_067180 | 238 coding  | noncoding | noncoding | noncoding |
| NM_001330724. 2  | CDKL2        | XLOC_067207 | 4935 coding | coding    | coding    | coding    |
| MSTRG. 61715. 11 | G3BP2        | XLOC_067208 | 2780 coding | coding    | coding    | coding    |
| MSTRG. 61723. 4  | USO1         | XLOC_067213 | 3137 coding | coding    | noncoding | coding    |
| MSTRG. 61713. 1  | LOC105377285 | XLOC_067218 | 321 coding  | noncoding | noncoding | noncoding |
| MSTRG. 61746. 1  | SDAD1        | XLOC_067224 | 272 coding  | noncoding | noncoding | noncoding |
| NM_001204255. 2  | SCARB2       | XLOC_067235 | 4265 coding | coding    | coding    | coding    |
| MSTRG. 61765. 1  | FAM47E       | XLOC_067239 | 271 coding  | noncoding | noncoding | noncoding |
| XM_011531910. 3  | CCDC158      | XLOC_067244 | 4381 coding | coding    | coding    | coding    |
| MSTRG. 61777. 1  | CCDC158      | XLOC_067246 | 237 coding  | noncoding | noncoding | noncoding |
| MSTRG. 61786. 1  | SHROOM3      | XLOC_067248 | 220 coding  | noncoding | noncoding | noncoding |
| MSTRG. 61803. 1  | SHROOM3      | XLOC_067259 | 290 coding  | noncoding | noncoding | noncoding |
| MSTRG. 61806. 1  | SHROOM3      | XLOC_067262 | 230 coding  | noncoding | noncoding | noncoding |
| MSTRG. 61808. 1  | SHROOM3      | XLOC_067264 | 242 coding  | noncoding | noncoding | noncoding |
| MSTRG. 61810. 1  | LOC105377289 | XLOC_067266 | 224 coding  | noncoding | noncoding | noncoding |
| NM_001029870. 3  | SOWAHB       | XLOC_067268 | 3993 coding | coding    | coding    | coding    |
| MSTRG. 61894. 2  | CCNI         | XLOC_067277 | 2156 coding | coding    | coding    | coding    |
| NM_001348133. 1  | CCNI         | XLOC_067277 | 1505 coding | coding    | coding    | coding    |

|                  |              |             |              |           |           |           |
|------------------|--------------|-------------|--------------|-----------|-----------|-----------|
| MSTRG. 61820. 1  | LOC107986292 | XLOC_067286 | 311 coding   | noncoding | noncoding | noncoding |
| MSTRG. 61953. 1  |              | XLOC_067354 | 294 coding   | noncoding | noncoding | noncoding |
| MSTRG. 62041. 3  | ANXA3        | XLOC_067394 | 878 coding   | coding    | noncoding | noncoding |
| XM_017008779. 1  | NAA11        | XLOC_067417 | 2518 coding  | coding    | coding    | coding    |
| MSTRG. 62112. 1  |              | XLOC_067429 | 217 coding   | noncoding | noncoding | noncoding |
| MSTRG. 62110. 1  | LOC105377302 | XLOC_067435 | 269 coding   | noncoding | noncoding | noncoding |
| MSTRG. 62192. 1  | CFAP299      | XLOC_067485 | 253 coding   | coding    | noncoding | noncoding |
| MSTRG. 62264. 1  |              | XLOC_067512 | 275 coding   | noncoding | noncoding | noncoding |
| MSTRG. 62303. 1  | RASGEF1B     | XLOC_067515 | 215 coding   | noncoding | noncoding | noncoding |
| MSTRG. 62306. 1  | RASGEF1B     | XLOC_067518 | 244 coding   | noncoding | noncoding | noncoding |
| MSTRG. 62299. 1  |              | XLOC_067524 | 255 coding   | noncoding | noncoding | noncoding |
| MSTRG. 62332. 1  | LOC107986215 | XLOC_067531 | 258 coding   | noncoding | noncoding | noncoding |
| MSTRG. 62316. 1  |              | XLOC_067538 | 269 coding   | noncoding | noncoding | noncoding |
| MSTRG. 62361. 1  |              | XLOC_067542 | 272 coding   | noncoding | noncoding | noncoding |
| NM_002138. 3     | HNRNPD       | XLOC_067546 | 2110 coding  | coding    | coding    | coding    |
| MSTRG. 62349. 1  |              | XLOC_067552 | 267 coding   | noncoding | noncoding | noncoding |
| MSTRG. 62378. 1  |              | XLOC_067556 | 289 coding   | noncoding | noncoding | noncoding |
| MSTRG. 62356. 1  | TMEM150C     | XLOC_067561 | 228 coding   | noncoding | noncoding | noncoding |
| NM_001288996. 2  | LIN54        | XLOC_067584 | 5854 coding  | coding    | coding    | coding    |
| MSTRG. 62413. 1  | LIN54        | XLOC_067586 | 274 coding   | noncoding | noncoding | noncoding |
| MSTRG. 62415. 1  | LIN54        | XLOC_067588 | 301 coding   | noncoding | noncoding | noncoding |
| MSTRG. 62388. 1  |              | XLOC_067591 | 209 coding   | noncoding | noncoding | noncoding |
| NM_001297758. 1  | HELQ         | XLOC_067623 | 2456 coding  | noncoding | coding    | coding    |
| MSTRG. 62539. 3  | ABRAXAS1     | XLOC_067624 | 4195 coding  | coding    | noncoding | coding    |
| MSTRG. 62508. 1  |              | XLOC_067643 | 241 coding   | coding    | noncoding | noncoding |
| MSTRG. 62655. 1  | MAPK10       | XLOC_067728 | 332 coding   | noncoding | noncoding | noncoding |
| MSTRG. 62579. 1  |              | XLOC_067756 | 247 coding   | noncoding | noncoding | noncoding |
| MSTRG. 62827. 1  |              | XLOC_067759 | 201 coding   | noncoding | noncoding | noncoding |
| MSTRG. 62836. 1  | AFF1         | XLOC_067761 | 12726 coding | coding    | coding    | coding    |
| MSTRG. 62836. 10 | AFF1         | XLOC_067761 | 7698 coding  | coding    | coding    | coding    |
| MSTRG. 62836. 17 | AFF1         | XLOC_067761 | 6183 coding  | noncoding | noncoding | noncoding |
| MSTRG. 62711. 1  |              | XLOC_067786 | 229 coding   | noncoding | noncoding | noncoding |
| NM_001291976. 1  | SPARCL1      | XLOC_067791 | 3019 coding  | coding    | coding    | coding    |
| MSTRG. 62730. 1  |              | XLOC_067797 | 233 coding   | noncoding | noncoding | noncoding |
| MSTRG. 62744. 1  |              | XLOC_067799 | 257 coding   | noncoding | noncoding | noncoding |
| MSTRG. 62745. 1  |              | XLOC_067800 | 359 coding   | noncoding | noncoding | noncoding |
| MSTRG. 62756. 1  |              | XLOC_067802 | 295 coding   | noncoding | noncoding | noncoding |
| MSTRG. 62761. 1  | MEPE         | XLOC_067805 | 210 coding   | noncoding | noncoding | noncoding |
| MSTRG. 62882. 1  | ABCG2        | XLOC_067813 | 249 coding   | noncoding | noncoding | noncoding |
| MSTRG. 62884. 1  | ABCG2        | XLOC_067815 | 241 coding   | noncoding | noncoding | noncoding |
| MSTRG. 62885. 1  | ABCG2        | XLOC_067816 | 227 coding   | noncoding | noncoding | noncoding |
| MSTRG. 62893. 1  | PPM1K-DT     | XLOC_067820 | 277 coding   | noncoding | noncoding | noncoding |
| NM_001042616. 2  | PIGY         | XLOC_067829 | 1356 coding  | coding    | coding    | noncoding |

|                  |              |             |              |           |           |           |
|------------------|--------------|-------------|--------------|-----------|-----------|-----------|
| MSTRG. 62900. 1  |              | XLOC_067830 | 251 coding   | noncoding | noncoding | noncoding |
| MSTRG. 62921. 1  |              | XLOC_067842 | 236 coding   | noncoding | noncoding | noncoding |
| XM_017008044. 1  | GPRIN3       | XLOC_067844 | 12762 coding | coding    | coding    | coding    |
| MSTRG. 62943. 1  | LOC105377329 | XLOC_067866 | 314 coding   | noncoding | noncoding | noncoding |
| MSTRG. 63292. 1  | CCSER1       | XLOC_067953 | 214 coding   | noncoding | noncoding | noncoding |
| MSTRG. 63066. 1  | GRID2        | XLOC_068019 | 201 coding   | noncoding | noncoding | noncoding |
| MSTRG. 63100. 1  | GRID2        | XLOC_068033 | 272 coding   | coding    | noncoding | noncoding |
| MSTRG. 63103. 1  | GRID2        | XLOC_068035 | 223 coding   | noncoding | noncoding | noncoding |
| MSTRG. 63107. 1  | GRID2        | XLOC_068037 | 239 coding   | noncoding | noncoding | noncoding |
| MSTRG. 63119. 1  | BMPRI1B      | XLOC_068064 | 259 coding   | noncoding | noncoding | noncoding |
| MSTRG. 63121. 1  | BMPRI1B      | XLOC_068066 | 282 coding   | noncoding | noncoding | noncoding |
| MSTRG. 63167. 1  | LINC02267    | XLOC_068086 | 397 coding   | noncoding | noncoding | noncoding |
| MSTRG. 63175. 1  | LINC02267    | XLOC_068092 | 224 coding   | noncoding | noncoding | noncoding |
| MSTRG. 63159. 1  |              | XLOC_068098 | 280 coding   | noncoding | noncoding | noncoding |
| MSTRG. 63417. 1  | TSPAN5       | XLOC_068125 | 321 coding   | noncoding | noncoding | noncoding |
| MSTRG. 63407. 1  | LOC105377343 | XLOC_068136 | 259 coding   | noncoding | noncoding | noncoding |
| MSTRG. 63411. 1  | LOC105377343 | XLOC_068138 | 313 coding   | noncoding | noncoding | noncoding |
| MSTRG. 63526. 1  |              | XLOC_068182 | 276 coding   | noncoding | noncoding | noncoding |
| XM_373030. 11    | C4orf54      | XLOC_068189 | 10526 coding | coding    | coding    | coding    |
| MSTRG. 63591. 1  |              | XLOC_068226 | 261 coding   | noncoding | noncoding | noncoding |
| MSTRG. 63626. 1  |              | XLOC_068243 | 400 coding   | noncoding | noncoding | noncoding |
| MSTRG. 63684. 1  |              | XLOC_068360 | 265 coding   | noncoding | noncoding | noncoding |
| MSTRG. 63712. 1  |              | XLOC_068382 | 263 coding   | coding    | noncoding | noncoding |
| XM_017008205. 2  | MANBA        | XLOC_068396 | 5264 coding  | coding    | coding    | coding    |
| MSTRG. 63974. 1  | MANBA        | XLOC_068402 | 271 coding   | noncoding | noncoding | noncoding |
| MSTRG. 63995. 1  | MANBA        | XLOC_068423 | 278 coding   | noncoding | noncoding | noncoding |
| NM_181892. 3     | UBE2D3       | XLOC_068428 | 4201 coding  | coding    | noncoding | coding    |
| NM_178833. 7     | SLC9B2       | XLOC_068432 | 6351 coding  | coding    | coding    | coding    |
| MSTRG. 64094. 1  | SLC9B1       | XLOC_068437 | 252 coding   | noncoding | noncoding | noncoding |
| MSTRG. 64098. 1  | SLC9B1       | XLOC_068439 | 317 coding   | coding    | noncoding | noncoding |
| MSTRG. 64105. 1  | SLC9B1       | XLOC_068440 | 459 coding   | noncoding | noncoding | noncoding |
| MSTRG. 64116. 1  | SLC9B2       | XLOC_068443 | 319 coding   | noncoding | noncoding | noncoding |
| MSTRG. 63876. 1  |              | XLOC_068449 | 278 coding   | coding    | noncoding | noncoding |
| MSTRG. 63886. 1  |              | XLOC_068454 | 221 coding   | noncoding | noncoding | noncoding |
| MSTRG. 63892. 1  | TACR3        | XLOC_068457 | 535 coding   | noncoding | noncoding | noncoding |
| MSTRG. 64028. 1  | CXXC4-AS1    | XLOC_068480 | 295 coding   | coding    | noncoding | noncoding |
| MSTRG. 64035. 1  |              | XLOC_068487 | 293 coding   | noncoding | noncoding | noncoding |
| MSTRG. 64048. 1  |              | XLOC_068495 | 277 coding   | noncoding | noncoding | noncoding |
| MSTRG. 64265. 9  | TET2         | XLOC_068518 | 12800 coding | coding    | coding    | noncoding |
| MSTRG. 64265. 15 | TET2         | XLOC_068518 | 9834 coding  | coding    | coding    | noncoding |
| MSTRG. 64265. 29 | TET2-AS1     | XLOC_068518 | 1220 coding  | noncoding | noncoding | noncoding |
| MSTRG. 64265. 32 | TET2         | XLOC_068518 | 10049 coding | coding    | noncoding | noncoding |
| MSTRG. 64190. 1  |              | XLOC_068582 | 303 coding   | noncoding | noncoding | noncoding |

|                  |              |             |             |           |           |           |
|------------------|--------------|-------------|-------------|-----------|-----------|-----------|
| MSTRG. 64192. 1  | LINC02173    | XLOC_068583 | 290 coding  | noncoding | noncoding | noncoding |
| MSTRG. 64194. 1  |              | XLOC_068584 | 429 coding  | noncoding | noncoding | noncoding |
| MSTRG. 64237. 1  |              | XLOC_068604 | 264 coding  | coding    | noncoding | noncoding |
| MSTRG. 64246. 1  |              | XLOC_068607 | 260 coding  | noncoding | noncoding | noncoding |
| MSTRG. 64255. 1  | LOC105377357 | XLOC_068610 | 303 coding  | noncoding | noncoding | noncoding |
| MSTRG. 64306. 1  |              | XLOC_068626 | 323 coding  | noncoding | noncoding | noncoding |
| MSTRG. 64309. 1  |              | XLOC_068628 | 243 coding  | noncoding | noncoding | noncoding |
| MSTRG. 64312. 1  |              | XLOC_068630 | 275 coding  | noncoding | noncoding | noncoding |
| MSTRG. 64401. 1  | RPL34-AS1    | XLOC_068702 | 264 coding  | noncoding | noncoding | noncoding |
| MSTRG. 64462. 1  | COL25A1      | XLOC_068732 | 276 coding  | coding    | noncoding | noncoding |
| MSTRG. 64580. 1  | CFI          | XLOC_068765 | 267 coding  | noncoding | noncoding | noncoding |
| MSTRG. 64642. 1  | ELOVL6       | XLOC_068783 | 282 coding  | noncoding | noncoding | noncoding |
| MSTRG. 64643. 1  | ELOVL6       | XLOC_068784 | 405 coding  | noncoding | noncoding | noncoding |
| MSTRG. 64646. 1  | ELOVL6       | XLOC_068787 | 286 coding  | noncoding | noncoding | noncoding |
| MSTRG. 64635. 1  |              | XLOC_068793 | 260 coding  | noncoding | noncoding | noncoding |
| MSTRG. 64666. 1  | ENPEP        | XLOC_068800 | 237 coding  | noncoding | noncoding | noncoding |
| MSTRG. 64648. 1  |              | XLOC_068801 | 257 coding  | noncoding | noncoding | noncoding |
| MSTRG. 64685. 1  |              | XLOC_068814 | 248 coding  | noncoding | noncoding | noncoding |
| MSTRG. 64687. 1  |              | XLOC_068815 | 224 coding  | noncoding | noncoding | noncoding |
| MSTRG. 64734. 1  |              | XLOC_068835 | 500 coding  | noncoding | noncoding | noncoding |
| MSTRG. 64744. 1  |              | XLOC_068839 | 223 coding  | noncoding | noncoding | noncoding |
| MSTRG. 64773. 21 | ALPK1        | XLOC_068853 | 4450 coding | noncoding | noncoding | noncoding |
| NM_024019. 4     | NEUROG2      | XLOC_068857 | 2295 coding | coding    | coding    | coding    |
| MSTRG. 64836. 1  | ANK2         | XLOC_068865 | 374 coding  | noncoding | noncoding | noncoding |
| MSTRG. 64842. 1  | ANK2         | XLOC_068869 | 209 coding  | noncoding | noncoding | noncoding |
| MSTRG. 64834. 1  | LOC105377374 | XLOC_068881 | 296 coding  | noncoding | noncoding | noncoding |
| MSTRG. 64865. 1  |              | XLOC_068931 | 317 coding  | noncoding | noncoding | noncoding |
| MSTRG. 64861. 1  |              | XLOC_068932 | 294 coding  | coding    | noncoding | noncoding |
| MSTRG. 64879. 1  |              | XLOC_068938 | 307 coding  | noncoding | noncoding | noncoding |
| MSTRG. 64888. 1  |              | XLOC_068943 | 310 coding  | noncoding | noncoding | noncoding |
| MSTRG. 64891. 1  | LOC107986235 | XLOC_068945 | 225 coding  | noncoding | noncoding | noncoding |
| MSTRG. 64900. 1  |              | XLOC_068950 | 232 coding  | noncoding | noncoding | noncoding |
| MSTRG. 64918. 1  |              | XLOC_068964 | 270 coding  | noncoding | noncoding | noncoding |
| MSTRG. 64925. 1  |              | XLOC_068977 | 306 coding  | noncoding | noncoding | noncoding |
| MSTRG. 64959. 1  |              | XLOC_068982 | 295 coding  | noncoding | noncoding | noncoding |
| MSTRG. 64960. 1  |              | XLOC_068983 | 493 coding  | noncoding | noncoding | noncoding |
| MSTRG. 64963. 1  |              | XLOC_068985 | 251 coding  | noncoding | noncoding | noncoding |
| MSTRG. 64987. 1  |              | XLOC_069000 | 218 coding  | noncoding | noncoding | noncoding |
| MSTRG. 64990. 1  |              | XLOC_069002 | 253 coding  | noncoding | noncoding | noncoding |
| MSTRG. 64991. 1  |              | XLOC_069003 | 322 coding  | noncoding | noncoding | noncoding |
| MSTRG. 65011. 1  |              | XLOC_069013 | 258 coding  | noncoding | noncoding | noncoding |
| MSTRG. 65012. 1  |              | XLOC_069014 | 213 coding  | noncoding | noncoding | noncoding |
| MSTRG. 65053. 1  | LINC02264    | XLOC_069027 | 275 coding  | coding    | noncoding | noncoding |

|                 |              |             |             |           |           |           |
|-----------------|--------------|-------------|-------------|-----------|-----------|-----------|
| MSTRG. 65141. 1 | NDST3        | XLOC_069034 | 294 coding  | coding    | noncoding | noncoding |
| MSTRG. 65148. 1 | NDST3        | XLOC_069040 | 319 coding  | noncoding | noncoding | noncoding |
| MSTRG. 65225. 1 | SEC24D       | XLOC_069069 | 224 coding  | noncoding | noncoding | noncoding |
| MSTRG. 65227. 1 | SEC24D       | XLOC_069071 | 438 coding  | noncoding | noncoding | noncoding |
| MSTRG. 65203. 1 | SYNPO2       | XLOC_069083 | 255 coding  | noncoding | noncoding | noncoding |
| MSTRG. 65190. 1 |              | XLOC_069087 | 233 coding  | coding    | noncoding | noncoding |
| MSTRG. 65277. 1 |              | XLOC_069117 | 295 coding  | noncoding | noncoding | noncoding |
| MSTRG. 65280. 1 |              | XLOC_069118 | 267 coding  | noncoding | noncoding | noncoding |
| MSTRG. 65282. 1 |              | XLOC_069120 | 383 coding  | noncoding | noncoding | noncoding |
| XM_024454212. 1 | NDNF         | XLOC_069165 | 8926 coding | coding    | coding    | coding    |
| MSTRG. 65389. 1 |              | XLOC_069180 | 258 coding  | noncoding | noncoding | noncoding |
| MSTRG. 65407. 1 |              | XLOC_069188 | 322 coding  | coding    | noncoding | noncoding |
| MSTRG. 65512. 1 | ADAD1        | XLOC_069196 | 280 coding  | noncoding | noncoding | noncoding |
| MSTRG. 65532. 1 |              | XLOC_069209 | 282 coding  | noncoding | noncoding | noncoding |
| MSTRG. 65537. 1 |              | XLOC_069212 | 324 coding  | noncoding | noncoding | noncoding |
| MSTRG. 65585. 1 | LOC105377406 | XLOC_069241 | 314 coding  | noncoding | noncoding | noncoding |
| MSTRG. 65632. 1 |              | XLOC_069263 | 228 coding  | noncoding | noncoding | noncoding |
| MSTRG. 65711. 1 |              | XLOC_069286 | 514 coding  | noncoding | noncoding | noncoding |
| MSTRG. 65716. 1 |              | XLOC_069288 | 250 coding  | noncoding | noncoding | noncoding |
| MSTRG. 65717. 1 |              | XLOC_069289 | 313 coding  | noncoding | noncoding | noncoding |
| MSTRG. 65724. 1 |              | XLOC_069293 | 307 coding  | noncoding | noncoding | noncoding |
| MSTRG. 65762. 1 | LOC102724210 | XLOC_069308 | 282 coding  | noncoding | noncoding | noncoding |
| MSTRG. 65747. 1 |              | XLOC_069312 | 286 coding  | noncoding | noncoding | noncoding |
| MSTRG. 65773. 1 | SLC25A31     | XLOC_069319 | 345 coding  | noncoding | noncoding | noncoding |
| MSTRG. 65799. 1 |              | XLOC_069325 | 227 coding  | coding    | noncoding | noncoding |
| MSTRG. 65869. 4 | LARP1B       | XLOC_069335 | 665 coding  | noncoding | noncoding | noncoding |
| MSTRG. 66399. 4 | JADE1        | XLOC_069367 | 2203 coding | coding    | coding    | noncoding |
| MSTRG. 65947. 1 |              | XLOC_069392 | 240 coding  | noncoding | noncoding | noncoding |
| MSTRG. 65951. 1 |              | XLOC_069394 | 309 coding  | noncoding | noncoding | noncoding |
| MSTRG. 65953. 1 | LINC02479    | XLOC_069395 | 281 coding  | noncoding | noncoding | noncoding |
| MSTRG. 65956. 1 |              | XLOC_069396 | 262 coding  | noncoding | noncoding | noncoding |
| MSTRG. 66000. 1 |              | XLOC_069417 | 321 coding  | noncoding | noncoding | noncoding |
| MSTRG. 66013. 1 |              | XLOC_069427 | 238 coding  | noncoding | noncoding | noncoding |
| MSTRG. 66015. 1 |              | XLOC_069429 | 275 coding  | noncoding | noncoding | noncoding |
| MSTRG. 66048. 1 |              | XLOC_069434 | 312 coding  | noncoding | noncoding | noncoding |
| MSTRG. 66057. 1 | LOC101927359 | XLOC_069440 | 320 coding  | noncoding | noncoding | noncoding |
| MSTRG. 66079. 1 |              | XLOC_069452 | 318 coding  | noncoding | noncoding | noncoding |
| NM_001363585. 1 | PABPC4L      | XLOC_069457 | 5040 coding | coding    | coding    | coding    |
| MSTRG. 66109. 1 | PABPC4L      | XLOC_069463 | 297 coding  | noncoding | noncoding | noncoding |
| MSTRG. 66110. 1 | PABPC4L      | XLOC_069464 | 249 coding  | noncoding | noncoding | noncoding |
| MSTRG. 66097. 1 |              | XLOC_069467 | 271 coding  | noncoding | noncoding | noncoding |
| MSTRG. 66122. 1 |              | XLOC_069472 | 481 coding  | noncoding | noncoding | noncoding |
| MSTRG. 66125. 1 |              | XLOC_069474 | 253 coding  | noncoding | noncoding | noncoding |

|                  |              |             |             |           |           |           |
|------------------|--------------|-------------|-------------|-----------|-----------|-----------|
| MSTRG. 66140. 1  |              | XLOC_069484 | 415 coding  | noncoding | noncoding | noncoding |
| MSTRG. 66147. 1  |              | XLOC_069488 | 300 coding  | noncoding | noncoding | noncoding |
| MSTRG. 66173. 1  |              | XLOC_069501 | 276 coding  | coding    | noncoding | noncoding |
| MSTRG. 66194. 1  | LINC02511    | XLOC_069506 | 300 coding  | noncoding | noncoding | noncoding |
| MSTRG. 66201. 1  | LINC02511    | XLOC_069511 | 225 coding  | noncoding | noncoding | noncoding |
| XM_017008311. 1  | PCDH18       | XLOC_069523 | 5958 coding | coding    | coding    | coding    |
| MSTRG. 66268. 1  | SLC7A11      | XLOC_069540 | 258 coding  | noncoding | noncoding | noncoding |
| MSTRG. 66308. 1  | LOC105377448 | XLOC_069553 | 286 coding  | noncoding | noncoding | noncoding |
| MSTRG. 66310. 1  | LOC105377448 | XLOC_069554 | 245 coding  | noncoding | noncoding | noncoding |
| MSTRG. 66324. 1  | LOC105377448 | XLOC_069555 | 273 coding  | noncoding | noncoding | noncoding |
| MSTRG. 66274. 1  | LOC105379412 | XLOC_069594 | 205 coding  | noncoding | noncoding | noncoding |
| MSTRG. 66278. 1  | MGARP        | XLOC_069597 | 253 coding  | noncoding | noncoding | noncoding |
| MSTRG. 66280. 1  | MGARP        | XLOC_069598 | 296 coding  | noncoding | noncoding | noncoding |
| MSTRG. 66394. 1  |              | XLOC_069614 | 361 coding  | noncoding | noncoding | noncoding |
| MSTRG. 66623. 1  | LOC101927490 | XLOC_069625 | 266 coding  | noncoding | noncoding | noncoding |
| MSTRG. 66637. 1  | MAML3        | XLOC_069634 | 260 coding  | noncoding | noncoding | noncoding |
| MSTRG. 66410. 1  |              | XLOC_069704 | 346 coding  | noncoding | noncoding | noncoding |
| MSTRG. 66412. 1  |              | XLOC_069705 | 292 coding  | noncoding | noncoding | noncoding |
| MSTRG. 66483. 1  | TBC1D9       | XLOC_069724 | 249 coding  | noncoding | noncoding | noncoding |
| MSTRG. 66467. 1  | RNF150       | XLOC_069735 | 284 coding  | noncoding | noncoding | noncoding |
| MSTRG. 66510. 1  | LOC107986194 | XLOC_069824 | 222 coding  | noncoding | noncoding | noncoding |
| MSTRG. 66755. 1  | FREM3        | XLOC_069843 | 264 coding  | coding    | noncoding | noncoding |
| XM_011531903. 2  | GYPB         | XLOC_069853 | 552 coding  | coding    | noncoding | coding    |
| XM_011531904. 3  | GYPB         | XLOC_069853 | 3057 coding | coding    | noncoding | noncoding |
| MSTRG. 66720. 1  | LOC105377462 | XLOC_069863 | 275 coding  | noncoding | noncoding | noncoding |
| MSTRG. 66815. 27 | ABCE1        | XLOC_069875 | 1034 coding | coding    | noncoding | noncoding |
| MSTRG. 66789. 1  |              | XLOC_069887 | 306 coding  | noncoding | noncoding | noncoding |
| MSTRG. 66793. 1  |              | XLOC_069890 | 422 coding  | noncoding | noncoding | noncoding |
| MSTRG. 66799. 1  |              | XLOC_069897 | 228 coding  | noncoding | noncoding | noncoding |
| MSTRG. 66801. 1  |              | XLOC_069898 | 317 coding  | noncoding | noncoding | noncoding |
| MSTRG. 66947. 1  | C4orf51      | XLOC_069909 | 295 coding  | noncoding | noncoding | noncoding |
| MSTRG. 66854. 1  | LOC105377470 | XLOC_069925 | 285 coding  | noncoding | noncoding | noncoding |
| MSTRG. 66857. 1  |              | XLOC_069938 | 243 coding  | noncoding | noncoding | noncoding |
| MSTRG. 67015. 1  | SLC10A7      | XLOC_069944 | 303 coding  | noncoding | noncoding | noncoding |
| MSTRG. 66978. 1  | TTC29        | XLOC_069967 | 259 coding  | noncoding | noncoding | noncoding |
| MSTRG. 66979. 1  | TTC29        | XLOC_069968 | 246 coding  | noncoding | noncoding | noncoding |
| MSTRG. 66974. 1  |              | XLOC_069976 | 237 coding  | noncoding | noncoding | noncoding |
| MSTRG. 66975. 1  |              | XLOC_069977 | 226 coding  | noncoding | noncoding | noncoding |
| MSTRG. 67005. 1  | LINC02507    | XLOC_069988 | 365 coding  | noncoding | noncoding | noncoding |
| MSTRG. 67417. 1  |              | XLOC_069990 | 274 coding  | noncoding | noncoding | noncoding |
| MSTRG. 67420. 4  | ARHGAP10     | XLOC_069992 | 2386 coding | coding    | noncoding | coding    |
| MSTRG. 67450. 1  | NR3C2        | XLOC_070000 | 305 coding  | coding    | noncoding | noncoding |
| MSTRG. 67462. 1  | NR3C2        | XLOC_070011 | 243 coding  | noncoding | noncoding | noncoding |

|                 |              |                   |              |           |           |           |
|-----------------|--------------|-------------------|--------------|-----------|-----------|-----------|
| MSTRG. 67056. 1 | LINC02355    | XLOC_070102       | 251 coding   | noncoding | noncoding | noncoding |
| MSTRG. 67099. 1 | DCLK2        | XLOC_070119       | 291 coding   | noncoding | noncoding | noncoding |
| MSTRG. 67244. 1 | LRBA         | XLOC_070136       | 234 coding   | noncoding | noncoding | noncoding |
| MSTRG. 67269. 1 | LRBA         | XLOC_070160       | 201 coding   | noncoding | noncoding | noncoding |
| MSTRG. 67272. 1 | LRBA         | XLOC_070163       | 276 coding   | noncoding | noncoding | noncoding |
| MSTRG. 67283. 1 | LRBA         | XLOC_070174       | 221 coding   | noncoding | noncoding | noncoding |
| MSTRG. 67284. 1 | LRBA         | XLOC_070175       | 298 coding   | noncoding | noncoding | noncoding |
| MSTRG. 67101. 1 |              | XLOC_070178       | 243 coding   | noncoding | noncoding | noncoding |
| MSTRG. 67102. 1 |              | XLOC_070179       | 269 coding   | coding    | noncoding | noncoding |
| MSTRG. 67103. 1 |              | XLOC_070180       | 255 coding   | noncoding | noncoding | noncoding |
| MSTRG. 67107. 1 |              | XLOC_070182       | 256 coding   | noncoding | noncoding | noncoding |
| MSTRG. 67109. 1 |              | XLOC_070184       | 251 coding   | noncoding | noncoding | noncoding |
| MSTRG. 67119. 1 |              | XLOC_070196       | 264 coding   | noncoding | noncoding | noncoding |
| MSTRG. 67202. 1 | FAM160A1     | XLOC_070216       | 436 coding   | noncoding | noncoding | noncoding |
| MSTRG. 67205. 1 | FAM160A1     | XLOC_070219       | 284 coding   | noncoding | noncoding | noncoding |
| MSTRG. 67224. 1 | GATB         | XLOC_070236       | 209 coding   | noncoding | noncoding | noncoding |
| MSTRG. 67173. 1 |              | XLOC_070254       | 300 coding   | noncoding | noncoding | noncoding |
| MSTRG. 67178. 1 | LOC105377490 | XLOC_070257       | 305 coding   | noncoding | noncoding | noncoding |
| NM_152680. 3    | TMEM154      | XLOC_070269       | 10534 coding | coding    | coding    | coding    |
| MSTRG. 67319. 1 |              | XLOC_070292       | 266 coding   | noncoding | noncoding | noncoding |
| MSTRG. 67344. 1 | TRIM2        | XLOC_070294       | 261 coding   | noncoding | noncoding | noncoding |
| MSTRG. 67352. 1 | TRIM2        | XLOC_070300       | 235 coding   | noncoding | noncoding | noncoding |
| MSTRG. 67637. 1 | DCHS2        | XLOC_070345       | 288 coding   | noncoding | noncoding | noncoding |
| MSTRG. 67674. 1 |              | XLOC_070368       | 356 coding   | coding    | noncoding | noncoding |
| MSTRG. 67676. 1 | LOC105377505 | XLOC_070369       | 241 coding   | noncoding | noncoding | noncoding |
| MSTRG. 67706. 1 |              | XLOC_070383       | 264 coding   | noncoding | noncoding | noncoding |
| MSTRG. 67730. 1 | GLRB         | XLOC_070402       | 230 coding   | noncoding | noncoding | noncoding |
| MSTRG. 67733. 1 |              | XLOC_070409       | 237 coding   | noncoding | noncoding | noncoding |
| MSTRG. 67734. 1 |              | XLOC_070410       | 249 coding   | noncoding | noncoding | noncoding |
| MSTRG. 67756. 1 | LOC105377509 | XLOC_070419       | 216 coding   | noncoding | noncoding | noncoding |
| MSTRG. 67794. 1 | LOC105377510 | XLOC_070445       | 268 coding   | noncoding | noncoding | noncoding |
| MSTRG. 67799. 1 |              | XLOC_070448       | 253 coding   | noncoding | noncoding | noncoding |
| XM_017007810. 1 | C4orf45      | XLOC_070455       | 1824 coding  | coding    | noncoding | coding    |
| MSTRG. 67845. 1 | C4orf45      | XLOC_070460       | 393 coding   | noncoding | noncoding | noncoding |
| MSTRG. 67870. 1 |              | XLOC_070481       | 272 coding   | noncoding | noncoding | noncoding |
| MSTRG. 67874. 1 |              | XLOC_070484       | 298 coding   | coding    | noncoding | noncoding |
| MSTRG. 67923. 1 | FSTL5        | XLOC_070503       | 277 coding   | noncoding | noncoding | noncoding |
| MSTRG. 67917. 1 |              | XLOC_070521       | 200 coding   | noncoding | noncoding | noncoding |
| MSTRG. 67970. 1 |              | XLOC_070531       | 234 coding   | noncoding | noncoding | noncoding |
| MSTRG. 67980. 1 |              | XLOC_070546       | 317 coding   | noncoding | noncoding | noncoding |
| MSTRG. 68132. 1 |              | 1-Mar XLOC_070561 | 214 coding   | coding    | noncoding | noncoding |
| MSTRG. 68137. 1 |              | 1-Mar XLOC_070563 | 292 coding   | noncoding | noncoding | noncoding |
| MSTRG. 68029. 1 |              | XLOC_070579       | 248 coding   | noncoding | noncoding | noncoding |

|                 |              |             |             |           |           |           |
|-----------------|--------------|-------------|-------------|-----------|-----------|-----------|
| MSTRG. 68042. 1 |              | XLOC_070585 | 320 coding  | noncoding | noncoding | noncoding |
| MSTRG. 68044. 1 |              | XLOC_070588 | 214 coding  | noncoding | noncoding | noncoding |
| MSTRG. 68046. 1 |              | XLOC_070589 | 238 coding  | noncoding | noncoding | noncoding |
| MSTRG. 68048. 1 |              | XLOC_070590 | 311 coding  | noncoding | noncoding | noncoding |
| MSTRG. 68195. 1 | TLL1         | XLOC_070617 | 239 coding  | noncoding | noncoding | noncoding |
| MSTRG. 68202. 1 |              | XLOC_070622 | 275 coding  | noncoding | noncoding | noncoding |
| MSTRG. 68207. 1 |              | XLOC_070625 | 235 coding  | noncoding | noncoding | noncoding |
| MSTRG. 68277. 1 | SPOCK3       | XLOC_070631 | 301 coding  | coding    | noncoding | noncoding |
| MSTRG. 68293. 1 |              | XLOC_070643 | 322 coding  | noncoding | noncoding | noncoding |
| MSTRG. 68426. 1 |              | XLOC_070667 | 284 coding  | noncoding | noncoding | noncoding |
| XM_011532406. 1 | DDX60L       | XLOC_070669 | 6679 coding | coding    | coding    | coding    |
| MSTRG. 68359. 1 | PALLD        | XLOC_070723 | 214 coding  | noncoding | noncoding | noncoding |
| MSTRG. 68361. 1 | PALLD        | XLOC_070724 | 217 coding  | noncoding | noncoding | noncoding |
| MSTRG. 68312. 1 |              | XLOC_070753 | 226 coding  | noncoding | noncoding | noncoding |
| MSTRG. 68325. 1 | SH3RF1       | XLOC_070755 | 212 coding  | noncoding | noncoding | noncoding |
| MSTRG. 68321. 1 |              | XLOC_070766 | 235 coding  | noncoding | noncoding | noncoding |
| NR_037878. 1    | LINC02275    | XLOC_070787 | 4365 coding | noncoding | coding    | noncoding |
| MSTRG. 68539. 1 |              | XLOC_070801 | 206 coding  | noncoding | noncoding | noncoding |
| MSTRG. 68540. 1 |              | XLOC_070802 | 286 coding  | coding    | noncoding | noncoding |
| XR_001741531. 1 | LINC02504    | XLOC_070809 | 4931 coding | noncoding | noncoding | noncoding |
| MSTRG. 68593. 1 | GALNTL6      | XLOC_070828 | 299 coding  | noncoding | noncoding | noncoding |
| MSTRG. 68595. 1 | GALNTL6      | XLOC_070830 | 307 coding  | noncoding | noncoding | noncoding |
| MSTRG. 68597. 1 | GALNTL6      | XLOC_070831 | 222 coding  | noncoding | noncoding | noncoding |
| MSTRG. 68617. 1 | GALNTL6      | XLOC_070840 | 262 coding  | noncoding | noncoding | noncoding |
| MSTRG. 68622. 1 | GALNTL6      | XLOC_070845 | 305 coding  | coding    | noncoding | noncoding |
| MSTRG. 68573. 1 |              | XLOC_070851 | 290 coding  | noncoding | noncoding | noncoding |
| MSTRG. 68671. 1 |              | XLOC_070907 | 215 coding  | noncoding | noncoding | noncoding |
| MSTRG. 68676. 1 | LINC02268    | XLOC_070912 | 339 coding  | noncoding | noncoding | noncoding |
| MSTRG. 68785. 2 | FBXO8        | XLOC_070917 | 3932 coding | coding    | coding    | coding    |
| MSTRG. 68760. 1 | HPGD         | XLOC_070934 | 426 coding  | noncoding | noncoding | noncoding |
| XM_017008630. 1 | GLRA3        | XLOC_070942 | 2888 coding | coding    | coding    | coding    |
| MSTRG. 68807. 1 |              | XLOC_070951 | 283 coding  | noncoding | noncoding | noncoding |
| MSTRG. 68824. 1 | GPM6A        | XLOC_070957 | 252 coding  | noncoding | noncoding | noncoding |
| MSTRG. 68845. 1 | ASB5         | XLOC_070972 | 350 coding  | noncoding | noncoding | noncoding |
| MSTRG. 68886. 1 | LOC105377555 | XLOC_070987 | 260 coding  | noncoding | noncoding | noncoding |
| MSTRG. 68896. 1 |              | XLOC_070992 | 257 coding  | noncoding | noncoding | noncoding |
| MSTRG. 68973. 1 | LOC105377561 | XLOC_071050 | 343 coding  | noncoding | noncoding | noncoding |
| MSTRG. 68984. 1 |              | XLOC_071055 | 295 coding  | coding    | noncoding | noncoding |
| MSTRG. 69006. 1 |              | XLOC_071067 | 263 coding  | noncoding | noncoding | noncoding |
| MSTRG. 69011. 1 |              | XLOC_071071 | 263 coding  | noncoding | noncoding | noncoding |
| MSTRG. 69017. 1 |              | XLOC_071074 | 257 coding  | coding    | noncoding | noncoding |
| MSTRG. 69029. 1 |              | XLOC_071081 | 271 coding  | noncoding | noncoding | noncoding |
| MSTRG. 69058. 1 | LOC105377567 | XLOC_071088 | 227 coding  | noncoding | noncoding | noncoding |

|                 |              |             |              |           |           |           |
|-----------------|--------------|-------------|--------------|-----------|-----------|-----------|
| MSTRG. 69045. 1 |              | XLOC_071098 | 312 coding   | noncoding | noncoding | noncoding |
| MSTRG. 69138. 1 | TENM3        | XLOC_071123 | 274 coding   | noncoding | noncoding | noncoding |
| MSTRG. 69152. 1 | TENM3        | XLOC_071131 | 254 coding   | noncoding | noncoding | noncoding |
| MSTRG. 69157. 1 | TENM3        | XLOC_071133 | 709 coding   | noncoding | noncoding | noncoding |
| MSTRG. 69164. 1 | TENM3        | XLOC_071138 | 225 coding   | noncoding | noncoding | noncoding |
| MSTRG. 69174. 1 | TENM3        | XLOC_071145 | 228 coding   | noncoding | noncoding | noncoding |
| MSTRG. 69185. 1 | TENM3        | XLOC_071151 | 280 coding   | noncoding | noncoding | noncoding |
| MSTRG. 69088. 1 |              | XLOC_071152 | 269 coding   | noncoding | noncoding | noncoding |
| MSTRG. 69100. 1 | LOC107986327 | XLOC_071161 | 314 coding   | noncoding | noncoding | noncoding |
| MSTRG. 69110. 1 | LOC105377578 | XLOC_071167 | 268 coding   | noncoding | noncoding | noncoding |
| MSTRG. 69204. 1 |              | XLOC_071207 | 257 coding   | noncoding | noncoding | noncoding |
| MSTRG. 69208. 1 |              | XLOC_071209 | 319 coding   | noncoding | noncoding | noncoding |
| MSTRG. 69209. 1 |              | XLOC_071210 | 264 coding   | noncoding | noncoding | noncoding |
| MSTRG. 69256. 1 |              | XLOC_071225 | 302 coding   | noncoding | noncoding | noncoding |
| XR_002959716. 1 | RWDD4        | XLOC_071230 | 2768 coding  | coding    | coding    | coding    |
| MSTRG. 69302. 1 | STOX2        | XLOC_071237 | 256 coding   | noncoding | noncoding | noncoding |
| MSTRG. 69393. 1 |              | XLOC_071276 | 293 coding   | noncoding | noncoding | noncoding |
| NM_001286710. 1 | ACSL1        | XLOC_071286 | 3921 coding  | coding    | coding    | coding    |
| NM_001286712. 1 | ACSL1        | XLOC_071286 | 4104 coding  | coding    | coding    | coding    |
| MSTRG. 69422. 1 | LINC02436    | XLOC_071308 | 255 coding   | noncoding | noncoding | noncoding |
| MSTRG. 69424. 1 |              | XLOC_071310 | 384 coding   | noncoding | noncoding | noncoding |
| MSTRG. 69487. 1 | SNX25        | XLOC_071311 | 236 coding   | noncoding | noncoding | noncoding |
| MSTRG. 69439. 1 |              | XLOC_071353 | 294 coding   | noncoding | noncoding | noncoding |
| MSTRG. 69481. 1 | LOC101928929 | XLOC_071369 | 206 coding   | noncoding | noncoding | noncoding |
| MSTRG. 69485. 1 | SORBS2       | XLOC_071371 | 228 coding   | noncoding | noncoding | noncoding |
| MSTRG. 69446. 1 |              | XLOC_071372 | 312 coding   | noncoding | noncoding | noncoding |
| MSTRG. 69452. 1 |              | XLOC_071378 | 292 coding   | noncoding | noncoding | noncoding |
| MSTRG. 69555. 1 | F11-AS1      | XLOC_071389 | 388 coding   | noncoding | noncoding | noncoding |
| MSTRG. 69557. 1 | F11-AS1      | XLOC_071390 | 272 coding   | noncoding | noncoding | noncoding |
| MSTRG. 69542. 1 |              | XLOC_071393 | 256 coding   | noncoding | noncoding | noncoding |
| MSTRG. 69546. 1 |              | XLOC_071394 | 238 coding   | noncoding | noncoding | noncoding |
| XM_005262834. 3 | FAT1         | XLOC_071395 | 14967 coding | coding    | noncoding | coding    |
| MSTRG. 69607. 1 | LOC102723906 | XLOC_071410 | 230 coding   | noncoding | noncoding | noncoding |
| MSTRG. 69615. 1 | LOC107986335 | XLOC_071416 | 247 coding   | noncoding | noncoding | noncoding |
| MSTRG. 69636. 1 |              | XLOC_071438 | 277 coding   | noncoding | noncoding | noncoding |
| MSTRG. 69648. 1 |              | XLOC_071444 | 240 coding   | noncoding | noncoding | noncoding |
| MSTRG. 69729. 1 |              | XLOC_071458 | 262 coding   | noncoding | noncoding | noncoding |
| MSTRG. 69730. 1 |              | XLOC_071459 | 330 coding   | noncoding | noncoding | noncoding |
| MSTRG. 69762. 1 | LOC107986338 | XLOC_071483 | 240 coding   | noncoding | noncoding | noncoding |
| MSTRG. 69770. 1 | PLEKHG4B     | XLOC_071486 | 206 coding   | noncoding | noncoding | noncoding |
| NM_001166260. 2 | TRIP13       | XLOC_071533 | 1452 coding  | coding    | coding    | coding    |
| NM_004237. 4    | TRIP13       | XLOC_071533 | 2431 coding  | coding    | coding    | coding    |
| MSTRG. 69811. 1 |              | XLOC_071534 | 437 coding   | noncoding | noncoding | noncoding |

|                 |                    |             |             |           |           |           |
|-----------------|--------------------|-------------|-------------|-----------|-----------|-----------|
| MSTRG. 69820. 1 | SLC12A7            | XLOC_071538 | 376 coding  | noncoding | noncoding | noncoding |
| MSTRG. 69816. 1 |                    | XLOC_071549 | 280 coding  | noncoding | noncoding | noncoding |
| MSTRG. 69834. 1 | TERT               | XLOC_071550 | 867 coding  | noncoding | coding    | coding    |
| MSTRG. 69896. 1 |                    | XLOC_071558 | 318 coding  | noncoding | noncoding | noncoding |
| XR_925685. 2    | LOC105374616       | XLOC_071570 | 2467 coding | noncoding | noncoding | noncoding |
| MSTRG. 69933. 1 | LOC112267947       | XLOC_071572 | 247 coding  | noncoding | noncoding | noncoding |
| XR_002956203. 1 | LOC105374618       | XLOC_071573 | 8837 coding | noncoding | noncoding | noncoding |
| MSTRG. 69947. 1 |                    | XLOC_071578 | 301 coding  | noncoding | noncoding | noncoding |
| MSTRG. 69983. 1 |                    | XLOC_071603 | 251 coding  | noncoding | noncoding | noncoding |
| MSTRG. 70021. 1 |                    | XLOC_071625 | 317 coding  | noncoding | noncoding | noncoding |
| MSTRG. 70026. 1 |                    | XLOC_071628 | 286 coding  | noncoding | noncoding | noncoding |
| MSTRG. 70057. 1 |                    | XLOC_071672 | 259 coding  | noncoding | noncoding | noncoding |
| MSTRG. 70070. 1 |                    | XLOC_071679 | 293 coding  | noncoding | noncoding | noncoding |
| MSTRG. 70077. 1 |                    | XLOC_071683 | 243 coding  | noncoding | noncoding | noncoding |
| XR_001742591. 1 |                    | XLOC_071724 | 8189 coding | noncoding | noncoding | noncoding |
| MSTRG. 70173. 1 |                    | XLOC_071725 | 211 coding  | noncoding | noncoding | noncoding |
| MSTRG. 70175. 1 |                    | XLOC_071727 | 258 coding  | noncoding | noncoding | noncoding |
| MSTRG. 70194. 1 |                    | XLOC_071736 | 311 coding  | noncoding | noncoding | noncoding |
| MSTRG. 70202. 1 |                    | XLOC_071741 | 293 coding  | noncoding | noncoding | noncoding |
| NM_001364441. 2 |                    | XLOC_071762 | 3748 coding | coding    | coding    | coding    |
| MSTRG. 70252. 1 |                    | XLOC_071771 | 221 coding  | noncoding | noncoding | noncoding |
| MSTRG. 70253. 1 |                    | XLOC_071772 | 330 coding  | noncoding | noncoding | noncoding |
| MSTRG. 70257. 1 |                    | XLOC_071773 | 303 coding  | noncoding | noncoding | noncoding |
| MSTRG. 70302. 1 |                    | XLOC_071797 | 226 coding  | noncoding | noncoding | noncoding |
| MSTRG. 70320. 1 |                    | XLOC_071831 | 270 coding  | noncoding | noncoding | noncoding |
| MSTRG. 70329. 1 |                    | XLOC_071837 | 323 coding  | noncoding | noncoding | noncoding |
| MSTRG. 70382. 1 |                    | XLOC_071847 | 247 coding  | noncoding | noncoding | noncoding |
| NM_001306153. 1 | CCT5               | XLOC_071861 | 3275 coding | coding    | coding    | coding    |
| MSTRG. 70408. 1 | ANKRD33B           | XLOC_071888 | 221 coding  | noncoding | noncoding | noncoding |
| MSTRG. 70456. 1 |                    | XLOC_071898 | 610 coding  | noncoding | noncoding | noncoding |
| MSTRG. 70513. 1 | CTNND2             | XLOC_071906 | 309 coding  | noncoding | noncoding | noncoding |
| MSTRG. 70525. 1 | CTNND2             | XLOC_071912 | 301 coding  | noncoding | noncoding | noncoding |
| MSTRG. 70586. 1 |                    | XLOC_071947 | 319 coding  | noncoding | noncoding | noncoding |
| MSTRG. 70610. 1 |                    | XLOC_071954 | 238 coding  | coding    | noncoding | noncoding |
| MSTRG. 70603. 1 |                    | XLOC_071958 | 391 coding  | noncoding | noncoding | noncoding |
| MSTRG. 70758. 1 | TRIO               | XLOC_071968 | 278 coding  | noncoding | noncoding | noncoding |
| MSTRG. 70619. 1 |                    | XLOC_071981 | 311 coding  | noncoding | noncoding | noncoding |
| MSTRG. 70640. 1 |                    | XLOC_072002 | 304 coding  | noncoding | noncoding | noncoding |
| MSTRG. 70643. 1 |                    | XLOC_072004 | 301 coding  | noncoding | noncoding | noncoding |
| MSTRG. 70674. 1 |                    | XLOC_072020 | 210 coding  | noncoding | noncoding | noncoding |
| MSTRG. 70727. 1 | FBXL7              | XLOC_072032 | 236 coding  | noncoding | noncoding | noncoding |
| MSTRG. 70731. 1 | FBXL7              | XLOC_072035 | 224 coding  | noncoding | noncoding | noncoding |
| MSTRG. 70743. 1 | 11-Mar XLOC_072043 |             | 305 coding  | noncoding | noncoding | noncoding |

|                 |           |             |            |           |           |           |
|-----------------|-----------|-------------|------------|-----------|-----------|-----------|
| MSTRG. 70745. 1 |           | XLOC_072047 | 202 coding | noncoding | noncoding | noncoding |
| MSTRG. 70779. 1 |           | XLOC_072066 | 300 coding | noncoding | noncoding | noncoding |
| MSTRG. 70811. 1 | BASP1-AS1 | XLOC_072068 | 283 coding | noncoding | noncoding | noncoding |
| MSTRG. 70816. 1 | BASP1-AS1 | XLOC_072071 | 231 coding | noncoding | noncoding | noncoding |
| MSTRG. 70960. 1 |           | XLOC_072140 | 309 coding | noncoding | noncoding | noncoding |
| MSTRG. 70968. 1 |           | XLOC_072145 | 234 coding | noncoding | noncoding | noncoding |
| MSTRG. 71004. 1 |           | XLOC_072150 | 319 coding | noncoding | noncoding | noncoding |
| MSTRG. 71025. 1 | CDH18     | XLOC_072160 | 281 coding | noncoding | noncoding | noncoding |
| MSTRG. 71033. 1 | CDH18     | XLOC_072164 | 293 coding | noncoding | noncoding | noncoding |
| MSTRG. 71048. 1 | CDH18     | XLOC_072172 | 226 coding | noncoding | noncoding | noncoding |
| MSTRG. 71056. 1 | CDH18     | XLOC_072178 | 271 coding | noncoding | noncoding | noncoding |
| MSTRG. 71075. 1 | LINC02241 | XLOC_072183 | 304 coding | noncoding | noncoding | noncoding |
| MSTRG. 71095. 1 |           | XLOC_072190 | 224 coding | noncoding | noncoding | noncoding |
| MSTRG. 71128. 1 |           | XLOC_072214 | 310 coding | noncoding | noncoding | noncoding |
| MSTRG. 71147. 1 |           | XLOC_072226 | 318 coding | noncoding | noncoding | noncoding |
| MSTRG. 71151. 1 |           | XLOC_072229 | 244 coding | noncoding | noncoding | noncoding |
| MSTRG. 71154. 1 |           | XLOC_072231 | 252 coding | noncoding | noncoding | noncoding |
| MSTRG. 71199. 1 |           | XLOC_072235 | 287 coding | noncoding | noncoding | noncoding |
| MSTRG. 71226. 1 | C5orf17   | XLOC_072243 | 247 coding | noncoding | noncoding | noncoding |
| MSTRG. 71233. 1 |           | XLOC_072247 | 297 coding | noncoding | noncoding | noncoding |
| MSTRG. 71236. 1 |           | XLOC_072252 | 221 coding | noncoding | noncoding | noncoding |
| MSTRG. 71254. 1 |           | XLOC_072260 | 266 coding | noncoding | noncoding | noncoding |
| MSTRG. 71264. 1 | LINC02228 | XLOC_072262 | 276 coding | noncoding | noncoding | noncoding |
| MSTRG. 71260. 1 | LINC02211 | XLOC_072269 | 287 coding | noncoding | noncoding | noncoding |
| MSTRG. 71307. 1 |           | XLOC_072288 | 215 coding | noncoding | noncoding | noncoding |
| MSTRG. 71317. 1 |           | XLOC_072293 | 341 coding | noncoding | noncoding | noncoding |
| MSTRG. 71323. 1 |           | XLOC_072295 | 297 coding | coding    | noncoding | noncoding |
| MSTRG. 71324. 1 |           | XLOC_072296 | 260 coding | noncoding | noncoding | noncoding |
| MSTRG. 71351. 1 |           | XLOC_072311 | 316 coding | coding    | noncoding | noncoding |
| MSTRG. 71385. 1 |           | XLOC_072331 | 278 coding | noncoding | noncoding | noncoding |
| MSTRG. 71393. 1 |           | XLOC_072338 | 347 coding | noncoding | noncoding | noncoding |
| MSTRG. 71402. 1 |           | XLOC_072343 | 228 coding | noncoding | noncoding | noncoding |
| MSTRG. 71413. 1 |           | XLOC_072347 | 331 coding | noncoding | noncoding | noncoding |
| MSTRG. 71432. 1 |           | XLOC_072360 | 288 coding | noncoding | noncoding | noncoding |
| MSTRG. 71453. 1 |           | XLOC_072367 | 266 coding | noncoding | noncoding | noncoding |
| MSTRG. 71467. 1 | CDH6      | XLOC_072378 | 269 coding | noncoding | noncoding | noncoding |
| MSTRG. 71536. 1 | C5orf22   | XLOC_072383 | 244 coding | noncoding | noncoding | noncoding |
| MSTRG. 71498. 1 | PDZD2     | XLOC_072391 | 285 coding | noncoding | noncoding | noncoding |
| MSTRG. 71501. 1 | PDZD2     | XLOC_072394 | 302 coding | noncoding | noncoding | noncoding |
| MSTRG. 71504. 1 | PDZD2     | XLOC_072395 | 295 coding | noncoding | noncoding | noncoding |
| MSTRG. 71505. 1 | PDZD2     | XLOC_072396 | 261 coding | noncoding | noncoding | noncoding |
| MSTRG. 71506. 1 | PDZD2     | XLOC_072397 | 344 coding | coding    | coding    | noncoding |
| MSTRG. 71511. 1 | PDZD2     | XLOC_072398 | 279 coding | noncoding | noncoding | noncoding |

|                  |         |             |              |           |           |           |
|------------------|---------|-------------|--------------|-----------|-----------|-----------|
| MSTRG. 71515. 1  | PDZD2   | XLOC_072399 | 320 coding   | noncoding | noncoding | noncoding |
| MSTRG. 71479. 1  |         | XLOC_072410 | 438 coding   | noncoding | noncoding | noncoding |
| MSTRG. 71538. 4  | MTMR12  | XLOC_072413 | 3648 coding  | coding    | coding    | noncoding |
| MSTRG. 71551. 1  |         | XLOC_072420 | 247 coding   | noncoding | noncoding | noncoding |
| MSTRG. 71557. 1  |         | XLOC_072423 | 260 coding   | noncoding | noncoding | noncoding |
| MSTRG. 71577. 1  | SUB1    | XLOC_072427 | 208 coding   | noncoding | noncoding | noncoding |
| MSTRG. 71606. 1  |         | XLOC_072438 | 306 coding   | noncoding | noncoding | noncoding |
| MSTRG. 71613. 1  |         | XLOC_072441 | 328 coding   | coding    | noncoding | noncoding |
| NM_016568. 3     | RXFP3   | XLOC_072465 | 2533 coding  | coding    | coding    | coding    |
| MSTRG. 71768. 1  | SLC45A2 | XLOC_072467 | 287 coding   | noncoding | noncoding | noncoding |
| MSTRG. 71769. 1  |         | XLOC_072527 | 432 coding   | noncoding | noncoding | noncoding |
| MSTRG. 71681. 1  |         | XLOC_072528 | 219 coding   | noncoding | noncoding | noncoding |
| MSTRG. 71717. 1  |         | XLOC_072551 | 214 coding   | noncoding | noncoding | noncoding |
| MSTRG. 71762. 1  |         | XLOC_072569 | 213 coding   | noncoding | noncoding | noncoding |
| MSTRG. 71864. 1  |         | XLOC_072631 | 286 coding   | noncoding | noncoding | noncoding |
| MSTRG. 71991. 1  |         | XLOC_072709 | 315 coding   | noncoding | noncoding | noncoding |
| MSTRG. 72108. 4  | OSMR    | XLOC_072730 | 21637 coding | coding    | coding    | coding    |
| MSTRG. 72181. 25 | FYB1    | XLOC_072736 | 13846 coding | noncoding | noncoding | coding    |
| MSTRG. 72105. 3  | DAB2    | XLOC_072740 | 2837 coding  | coding    | noncoding | noncoding |
| MSTRG. 72107. 1  |         | XLOC_072745 | 227 coding   | noncoding | noncoding | noncoding |
| MSTRG. 72144. 1  |         | XLOC_072760 | 259 coding   | noncoding | noncoding | noncoding |
| MSTRG. 72266. 1  | RPL37   | XLOC_072793 | 444 coding   | coding    | noncoding | noncoding |
| MSTRG. 72226. 1  | C7      | XLOC_072799 | 209 coding   | noncoding | noncoding | noncoding |
| MSTRG. 72229. 1  | MROH2B  | XLOC_072801 | 205 coding   | noncoding | noncoding | noncoding |
| MSTRG. 72287. 1  | C6      | XLOC_072804 | 257 coding   | noncoding | noncoding | noncoding |
| MSTRG. 72289. 1  | C6      | XLOC_072805 | 245 coding   | noncoding | noncoding | noncoding |
| MSTRG. 72317. 1  | FBXO4   | XLOC_072826 | 266 coding   | noncoding | noncoding | noncoding |
| MSTRG. 72307. 1  |         | XLOC_072832 | 241 coding   | noncoding | noncoding | noncoding |
| NM_001330714. 2  | ZNF131  | XLOC_072897 | 3340 coding  | coding    | coding    | coding    |
| MSTRG. 72426. 1  | ZNF131  | XLOC_072900 | 293 coding   | noncoding | noncoding | noncoding |
| MSTRG. 72545. 1  | NNT-AS1 | XLOC_072926 | 252 coding   | noncoding | noncoding | noncoding |
| MSTRG. 72559. 1  | NNT     | XLOC_072940 | 247 coding   | noncoding | noncoding | noncoding |
| MSTRG. 72501. 1  |         | XLOC_072944 | 395 coding   | coding    | noncoding | noncoding |
| MSTRG. 72524. 1  |         | XLOC_072952 | 233 coding   | noncoding | noncoding | noncoding |
| MSTRG. 72578. 1  |         | XLOC_072975 | 219 coding   | coding    | noncoding | noncoding |
| MSTRG. 72582. 1  |         | XLOC_072977 | 223 coding   | noncoding | noncoding | noncoding |
| MSTRG. 72585. 1  |         | XLOC_072979 | 317 coding   | noncoding | noncoding | noncoding |
| MSTRG. 72613. 1  | HCN1    | XLOC_072983 | 239 coding   | coding    | noncoding | noncoding |
| XM_011543631. 3  | PARP8   | XLOC_073154 | 7090 coding  | coding    | coding    | coding    |
| XM_011543636. 2  | PARP8   | XLOC_073154 | 7071 coding  | coding    | coding    | coding    |
| MSTRG. 72834. 1  |         | XLOC_073168 | 279 coding   | noncoding | noncoding | noncoding |
| MSTRG. 72837. 1  |         | XLOC_073170 | 246 coding   | noncoding | noncoding | noncoding |
| MSTRG. 72845. 1  |         | XLOC_073174 | 212 coding   | noncoding | noncoding | noncoding |

|                 |              |             |             |           |           |           |
|-----------------|--------------|-------------|-------------|-----------|-----------|-----------|
| MSTRG. 72850. 1 |              | XLOC_073176 | 293 coding  | noncoding | noncoding | noncoding |
| MSTRG. 72873. 1 |              | XLOC_073186 | 272 coding  | noncoding | noncoding | noncoding |
| MSTRG. 72884. 1 |              | XLOC_073193 | 310 coding  | coding    | noncoding | noncoding |
| MSTRG. 72890. 1 |              | XLOC_073196 | 271 coding  | coding    | noncoding | noncoding |
| MSTRG. 72910. 1 | LOC105378964 | XLOC_073204 | 260 coding  | noncoding | noncoding | noncoding |
| MSTRG. 72967. 1 | ITGA1        | XLOC_073218 | 272 coding  | noncoding | noncoding | noncoding |
| MSTRG. 72923. 1 |              | XLOC_073227 | 299 coding  | noncoding | noncoding | noncoding |
| MSTRG. 72929. 1 |              | XLOC_073228 | 273 coding  | noncoding | noncoding | noncoding |
| MSTRG. 72947. 1 |              | XLOC_073231 | 300 coding  | noncoding | noncoding | noncoding |
| MSTRG. 72982. 1 | NDUFS4       | XLOC_073238 | 237 coding  | coding    | noncoding | noncoding |
| MSTRG. 72971. 1 |              | XLOC_073247 | 242 coding  | noncoding | noncoding | noncoding |
| MSTRG. 72974. 1 |              | XLOC_073248 | 453 coding  | noncoding | noncoding | noncoding |
| XM_017008997. 1 | SNX18        | XLOC_073270 | 2695 coding | coding    | coding    | coding    |
| MSTRG. 73093. 1 |              | XLOC_073298 | 263 coding  | noncoding | noncoding | noncoding |
| MSTRG. 73124. 1 |              | XLOC_073311 | 267 coding  | noncoding | noncoding | noncoding |
| MSTRG. 73140. 1 | DDX4         | XLOC_073320 | 232 coding  | noncoding | noncoding | noncoding |
| XM_017009485. 1 | MAP3K1       | XLOC_073408 | 5295 coding | coding    | coding    | coding    |
| MSTRG. 73322. 1 |              | XLOC_073428 | 268 coding  | noncoding | noncoding | noncoding |
| NM_001203246. 1 | GPBP1        | XLOC_073429 | 4503 coding | coding    | coding    | coding    |
| MSTRG. 73449. 1 |              | XLOC_073454 | 283 coding  | noncoding | noncoding | noncoding |
| NM_001317915. 2 | RAB3C        | XLOC_073469 | 8966 coding | coding    | coding    | coding    |
| MSTRG. 73508. 2 | ELOVL7       | XLOC_073683 | 2778 coding | coding    | noncoding | noncoding |
| MSTRG. 73585. 1 | NDUFAF2      | XLOC_073702 | 209 coding  | noncoding | noncoding | noncoding |
| MSTRG. 73753. 1 | IPO11        | XLOC_073830 | 214 coding  | noncoding | noncoding | noncoding |
| MSTRG. 73637. 1 |              | XLOC_073834 | 260 coding  | coding    | noncoding | noncoding |
| MSTRG. 73638. 1 |              | XLOC_073835 | 272 coding  | coding    | noncoding | noncoding |
| MSTRG. 73652. 1 | LOC107986418 | XLOC_073839 | 201 coding  | noncoding | noncoding | noncoding |
| MSTRG. 73662. 1 |              | XLOC_073846 | 463 coding  | noncoding | noncoding | noncoding |
| MSTRG. 73666. 1 |              | XLOC_073848 | 291 coding  | coding    | noncoding | noncoding |
| MSTRG. 73676. 1 |              | XLOC_073851 | 261 coding  | noncoding | noncoding | noncoding |
| MSTRG. 73765. 1 | RNF180       | XLOC_073855 | 235 coding  | noncoding | noncoding | noncoding |
| MSTRG. 73864. 1 | CWC27        | XLOC_073891 | 506 coding  | noncoding | noncoding | noncoding |
| MSTRG. 73780. 1 |              | XLOC_073893 | 306 coding  | noncoding | noncoding | noncoding |
| MSTRG. 73866. 1 |              | XLOC_073940 | 244 coding  | noncoding | noncoding | noncoding |
| NM_139168. 3    | SREK1        | XLOC_073951 | 6935 coding | coding    | noncoding | coding    |
| MSTRG. 73920. 1 |              | XLOC_073965 | 357 coding  | noncoding | noncoding | noncoding |
| MSTRG. 73945. 1 | LOC105379003 | XLOC_073968 | 217 coding  | noncoding | noncoding | noncoding |
| MSTRG. 74123. 1 | MAST4        | XLOC_073982 | 359 coding  | noncoding | noncoding | noncoding |
| MSTRG. 73999. 1 |              | XLOC_074017 | 276 coding  | noncoding | noncoding | noncoding |
| MSTRG. 74018. 1 |              | XLOC_074025 | 305 coding  | noncoding | noncoding | noncoding |
| MSTRG. 74100. 1 | PIK3R1       | XLOC_074053 | 218 coding  | noncoding | noncoding | noncoding |
| NM_002538. 4    | OCLN         | XLOC_074092 | 6183 coding | coding    | coding    | coding    |
| MSTRG. 74252. 1 |              | XLOC_074099 | 2027 coding | noncoding | coding    | noncoding |

|                |              |             |              |           |           |           |
|----------------|--------------|-------------|--------------|-----------|-----------|-----------|
| NM_001178087.1 | SERF1B       | XLOC_074102 | 699 coding   | coding    | coding    | noncoding |
| NR_073404.1    | LOC441081    | XLOC_074126 | 5287 coding  | coding    | coding    | coding    |
| NM_022968.1    | SERF1A       | XLOC_074140 | 707 coding   | coding    | coding    | noncoding |
| MSTRG.74239.1  | LOC107986382 | XLOC_074180 | 245 coding   | noncoding | noncoding | noncoding |
| MSTRG.74245.1  |              | XLOC_074181 | 233 coding   | noncoding | noncoding | noncoding |
| MSTRG.74336.1  | LOC105379028 | XLOC_074184 | 267 coding   | noncoding | noncoding | noncoding |
| MSTRG.74361.1  | PTCD2        | XLOC_074193 | 280 coding   | noncoding | noncoding | noncoding |
| MSTRG.74381.1  | ZNF366       | XLOC_074200 | 667 coding   | coding    | noncoding | coding    |
| MSTRG.74374.1  |              | XLOC_074216 | 279 coding   | noncoding | noncoding | noncoding |
| MSTRG.74473.1  | FCHO2        | XLOC_074244 | 417 coding   | noncoding | noncoding | noncoding |
| MSTRG.74434.1  |              | XLOC_074250 | 456 coding   | noncoding | noncoding | noncoding |
| MSTRG.74555.1  | ARHGEF28     | XLOC_074275 | 255 coding   | noncoding | noncoding | noncoding |
| MSTRG.74507.1  |              | XLOC_074302 | 292 coding   | noncoding | noncoding | noncoding |
| MSTRG.74571.1  | LOC105379039 | XLOC_074310 | 309 coding   | noncoding | noncoding | noncoding |
| XM_011543358.1 | HMGCR        | XLOC_074334 | 4620 coding  | coding    | coding    | coding    |
| MSTRG.74908.1  |              | XLOC_074345 | 245 coding   | coding    | noncoding | noncoding |
| MSTRG.74910.1  |              | XLOC_074346 | 270 coding   | noncoding | noncoding | noncoding |
| XM_011543281.3 | SV2C         | XLOC_074347 | 11160 coding | coding    | coding    | coding    |
| MSTRG.74934.1  | SV2C         | XLOC_074356 | 238 coding   | coding    | noncoding | noncoding |
| MSTRG.74913.1  |              | XLOC_074362 | 454 coding   | noncoding | noncoding | noncoding |
| MSTRG.74943.1  |              | XLOC_074419 | 252 coding   | noncoding | noncoding | noncoding |
| MSTRG.74944.1  |              | XLOC_074420 | 274 coding   | noncoding | noncoding | noncoding |
| MSTRG.74962.1  | S100Z        | XLOC_074427 | 293 coding   | coding    | noncoding | noncoding |
| MSTRG.75088.1  |              | XLOC_074453 | 200 coding   | noncoding | noncoding | noncoding |
| MSTRG.75129.1  |              | XLOC_074458 | 368 coding   | noncoding | noncoding | noncoding |
| MSTRG.75247.1  | SCAMP1       | XLOC_074478 | 222 coding   | noncoding | noncoding | noncoding |
| MSTRG.75214.1  |              | XLOC_074506 | 226 coding   | noncoding | noncoding | noncoding |
| MSTRG.75215.1  |              | XLOC_074507 | 322 coding   | noncoding | noncoding | noncoding |
| MSTRG.75228.1  | JMY          | XLOC_074517 | 218 coding   | noncoding | noncoding | noncoding |
| MSTRG.75193.1  |              | XLOC_074534 | 386 coding   | noncoding | noncoding | noncoding |
| XM_011543227.2 | TENT2        | XLOC_074535 | 3476 coding  | coding    | coding    | coding    |
| XM_017009151.2 | TENT2        | XLOC_074535 | 3725 coding  | coding    | coding    | coding    |
| MSTRG.75309.1  | TENT2        | XLOC_074540 | 287 coding   | noncoding | noncoding | noncoding |
| MSTRG.75333.1  | CMYA5        | XLOC_074558 | 247 coding   | noncoding | noncoding | noncoding |
| MSTRG.75297.1  |              | XLOC_074593 | 436 coding   | noncoding | noncoding | noncoding |
| NM_032567.4    | SPZ1         | XLOC_074594 | 1841 coding  | noncoding | coding    | coding    |
| MSTRG.75422.1  | ZFYVE16      | XLOC_074604 | 248 coding   | noncoding | noncoding | noncoding |
| XM_011543237.2 | FAM151B      | XLOC_074607 | 1640 coding  | coding    | noncoding | coding    |
| MSTRG.75428.1  | FAM151B      | XLOC_074610 | 253 coding   | noncoding | noncoding | noncoding |
| MSTRG.75828.1  | RASGRF2      | XLOC_074638 | 267 coding   | noncoding | noncoding | noncoding |
| MSTRG.75552.1  | ATG10        | XLOC_074685 | 245 coding   | coding    | noncoding | noncoding |
| MSTRG.75569.1  | ATG10        | XLOC_074697 | 205 coding   | noncoding | noncoding | noncoding |
| MSTRG.75521.1  |              | XLOC_074715 | 361 coding   | noncoding | noncoding | noncoding |

|                  |              |             |             |           |           |           |
|------------------|--------------|-------------|-------------|-----------|-----------|-----------|
| MSTRG. 75544. 1  |              | XLOC_074734 | 295 coding  | coding    | noncoding | noncoding |
| MSTRG. 75581. 1  |              | XLOC_074744 | 265 coding  | noncoding | noncoding | noncoding |
| MSTRG. 75620. 1  | EDIL3        | XLOC_074750 | 207 coding  | noncoding | noncoding | noncoding |
| MSTRG. 75627. 1  | EDIL3        | XLOC_074756 | 280 coding  | noncoding | noncoding | noncoding |
| XR_001742782. 1  | LOC105379057 | XLOC_074758 | 8261 coding | noncoding | noncoding | noncoding |
| MSTRG. 75609. 1  |              | XLOC_074765 | 254 coding  | noncoding | noncoding | noncoding |
| MSTRG. 75615. 1  |              | XLOC_074768 | 263 coding  | noncoding | noncoding | noncoding |
| MSTRG. 75641. 1  |              | XLOC_074771 | 268 coding  | noncoding | noncoding | noncoding |
| MSTRG. 75643. 1  |              | XLOC_074772 | 221 coding  | coding    | noncoding | noncoding |
| MSTRG. 75657. 1  |              | XLOC_074777 | 275 coding  | noncoding | noncoding | noncoding |
| MSTRG. 75686. 1  |              | XLOC_074788 | 255 coding  | noncoding | noncoding | noncoding |
| MSTRG. 75696. 1  |              | XLOC_074792 | 287 coding  | noncoding | noncoding | noncoding |
| NM_001867. 3     | COX7C        | XLOC_074793 | 629 coding  | coding    | noncoding | noncoding |
| MSTRG. 75700. 1  |              | XLOC_074796 | 281 coding  | noncoding | noncoding | noncoding |
| MSTRG. 75749. 1  | LOC101929380 | XLOC_074810 | 289 coding  | coding    | noncoding | noncoding |
| MSTRG. 75869. 14 | CCNH         | XLOC_074816 | 1394 coding | noncoding | noncoding | noncoding |
| MSTRG. 75869. 15 | RASA1        | XLOC_074816 | 662 coding  | coding    | noncoding | noncoding |
| MSTRG. 75869. 21 | RASA1        | XLOC_074816 | 2134 coding | noncoding | noncoding | noncoding |
| MSTRG. 75869. 20 | RASA1        | XLOC_074816 | 4888 coding | coding    | coding    | noncoding |
| MSTRG. 75763. 1  |              | XLOC_074826 | 306 coding  | noncoding | noncoding | noncoding |
| MSTRG. 75768. 1  |              | XLOC_074830 | 220 coding  | noncoding | noncoding | noncoding |
| MSTRG. 75993. 1  | LINC00461    | XLOC_074854 | 218 coding  | noncoding | noncoding | noncoding |
| MSTRG. 76064. 1  | MEF2C-AS1    | XLOC_074874 | 258 coding  | noncoding | noncoding | noncoding |
| MSTRG. 75921. 1  |              | XLOC_074894 | 267 coding  | noncoding | noncoding | noncoding |
| MSTRG. 75936. 1  | LINC02161    | XLOC_074898 | 309 coding  | noncoding | noncoding | noncoding |
| MSTRG. 75961. 1  | LINC01339    | XLOC_074911 | 248 coding  | noncoding | noncoding | noncoding |
| MSTRG. 76257. 13 | LUCAT1       | XLOC_074925 | 6482 coding | noncoding | noncoding | noncoding |
| MSTRG. 76257. 16 | LUCAT1       | XLOC_074925 | 2395 coding | noncoding | noncoding | noncoding |
| MSTRG. 76257. 19 | LUCAT1       | XLOC_074925 | 4608 coding | noncoding | coding    | noncoding |
| MSTRG. 76123. 1  |              | XLOC_074940 | 418 coding  | noncoding | noncoding | noncoding |
| MSTRG. 76156. 1  | LOC105379080 | XLOC_074958 | 290 coding  | noncoding | noncoding | noncoding |
| MSTRG. 76182. 1  |              | XLOC_074974 | 248 coding  | noncoding | noncoding | noncoding |
| MSTRG. 76190. 1  |              | XLOC_074980 | 258 coding  | coding    | noncoding | noncoding |
| MSTRG. 77957. 19 | FAM172A      | XLOC_074983 | 471 coding  | noncoding | noncoding | noncoding |
| MSTRG. 76295. 1  |              | XLOC_075010 | 261 coding  | noncoding | noncoding | noncoding |
| MSTRG. 76299. 1  | LOC105379089 | XLOC_075013 | 341 coding  | coding    | noncoding | noncoding |
| MSTRG. 76818. 1  | LOC101929710 | XLOC_075076 | 311 coding  | noncoding | noncoding | noncoding |
| MSTRG. 76849. 1  | LOC101929710 | XLOC_075082 | 314 coding  | noncoding | noncoding | noncoding |
| MSTRG. 76505. 1  |              | XLOC_075129 | 269 coding  | noncoding | noncoding | noncoding |
| MSTRG. 76391. 1  |              | XLOC_075138 | 223 coding  | noncoding | noncoding | noncoding |
| MSTRG. 76414. 1  |              | XLOC_075144 | 230 coding  | coding    | noncoding | noncoding |
| MSTRG. 76413. 1  |              | XLOC_075145 | 212 coding  | noncoding | noncoding | noncoding |
| MSTRG. 76420. 1  |              | XLOC_075147 | 243 coding  | noncoding | noncoding | noncoding |

|                  |              |             |              |           |           |           |
|------------------|--------------|-------------|--------------|-----------|-----------|-----------|
| MSTRG. 76566. 1  |              | XLOC_075192 | 257 coding   | coding    | noncoding | noncoding |
| MSTRG. 76568. 1  |              | XLOC_075194 | 301 coding   | noncoding | noncoding | noncoding |
| MSTRG. 76698. 15 | ST8SIA4      | XLOC_075218 | 11230 coding | noncoding | noncoding | noncoding |
| MSTRG. 76675. 1  |              | XLOC_075242 | 314 coding   | noncoding | noncoding | noncoding |
| MSTRG. 76687. 1  |              | XLOC_075252 | 288 coding   | noncoding | noncoding | noncoding |
| MSTRG. 76705. 1  |              | XLOC_075295 | 223 coding   | noncoding | noncoding | noncoding |
| MSTRG. 77035. 1  | PAM          | XLOC_075337 | 250 coding   | noncoding | noncoding | noncoding |
| MSTRG. 76926. 1  |              | XLOC_075379 | 245 coding   | coding    | noncoding | noncoding |
| MSTRG. 76986. 1  | LOC105379107 | XLOC_075393 | 298 coding   | noncoding | noncoding | noncoding |
| MSTRG. 77002. 1  |              | XLOC_075400 | 356 coding   | noncoding | noncoding | noncoding |
| MSTRG. 77072. 1  |              | XLOC_075404 | 291 coding   | noncoding | noncoding | noncoding |
| MSTRG. 77071. 1  |              | XLOC_075409 | 286 coding   | noncoding | noncoding | noncoding |
| MSTRG. 77088. 1  |              | XLOC_075421 | 262 coding   | noncoding | noncoding | noncoding |
| MSTRG. 77094. 1  |              | XLOC_075423 | 222 coding   | noncoding | noncoding | noncoding |
| MSTRG. 77114. 1  |              | XLOC_075435 | 245 coding   | coding    | noncoding | noncoding |
| MSTRG. 77133. 1  |              | XLOC_075445 | 310 coding   | noncoding | noncoding | noncoding |
| MSTRG. 77158. 1  |              | XLOC_075497 | 331 coding   | noncoding | noncoding | noncoding |
| MSTRG. 77217. 1  |              | XLOC_075506 | 242 coding   | noncoding | noncoding | noncoding |
| MSTRG. 77222. 1  |              | XLOC_075507 | 276 coding   | noncoding | noncoding | noncoding |
| MSTRG. 77376. 1  | FER          | XLOC_075510 | 222 coding   | noncoding | noncoding | noncoding |
| XM_017009472. 1  | MAN2A1       | XLOC_075579 | 3659 coding  | coding    | coding    | coding    |
| MSTRG. 77288. 1  |              | XLOC_075611 | 221 coding   | noncoding | noncoding | noncoding |
| MSTRG. 77346. 1  |              | XLOC_075615 | 251 coding   | coding    | noncoding | noncoding |
| MSTRG. 77372. 1  |              | XLOC_075623 | 229 coding   | noncoding | noncoding | noncoding |
| NM_138773. 4     | SLC25A46     | XLOC_075637 | 4745 coding  | coding    | coding    | coding    |
| MSTRG. 77657. 1  | NREP         | XLOC_075711 | 261 coding   | noncoding | noncoding | noncoding |
| MSTRG. 77522. 1  |              | XLOC_075717 | 222 coding   | noncoding | noncoding | noncoding |
| MSTRG. 77524. 1  |              | XLOC_075718 | 294 coding   | noncoding | noncoding | noncoding |
| MSTRG. 77683. 1  | APC          | XLOC_075775 | 231 coding   | noncoding | noncoding | noncoding |
| XR_001742031. 1  | DCP2         | XLOC_075782 | 8845 coding  | coding    | coding    | coding    |
| XM_017009163. 1  | DCP2         | XLOC_075782 | 9065 coding  | coding    | coding    | coding    |
| NM_001242377. 2  | DCP2         | XLOC_075782 | 10005 coding | coding    | coding    | coding    |
| MSTRG. 77815. 1  | MCC          | XLOC_075800 | 760 coding   | noncoding | noncoding | noncoding |
| MSTRG. 77851. 1  | MCC          | XLOC_075827 | 275 coding   | noncoding | noncoding | noncoding |
| MSTRG. 77720. 1  | KCNN2        | XLOC_075841 | 303 coding   | coding    | noncoding | noncoding |
| MSTRG. 77747. 1  | LOC101927078 | XLOC_075855 | 435 coding   | noncoding | noncoding | noncoding |
| MSTRG. 77703. 1  |              | XLOC_075857 | 286 coding   | noncoding | noncoding | noncoding |
| MSTRG. 77707. 1  |              | XLOC_075859 | 235 coding   | noncoding | noncoding | noncoding |
| MSTRG. 77710. 1  |              | XLOC_075860 | 219 coding   | noncoding | noncoding | noncoding |
| MSTRG. 77712. 1  |              | XLOC_075862 | 426 coding   | noncoding | noncoding | noncoding |
| MSTRG. 77865. 1  |              | XLOC_075882 | 290 coding   | noncoding | noncoding | noncoding |
| MSTRG. 77861. 1  |              | XLOC_075884 | 278 coding   | noncoding | noncoding | noncoding |
| MSTRG. 77862. 1  |              | XLOC_075885 | 228 coding   | noncoding | noncoding | noncoding |

|                 |              |             |             |           |           |           |
|-----------------|--------------|-------------|-------------|-----------|-----------|-----------|
| MSTRG. 77907. 1 |              | XLOC_075896 | 401 coding  | noncoding | noncoding | noncoding |
| MSTRG. 77939. 1 | LVRN         | XLOC_075907 | 318 coding  | noncoding | noncoding | noncoding |
| MSTRG. 78519. 1 |              | XLOC_075958 | 252 coding  | noncoding | noncoding | noncoding |
| MSTRG. 78100. 1 |              | XLOC_075975 | 225 coding  | noncoding | noncoding | noncoding |
| MSTRG. 78120. 1 |              | XLOC_075990 | 225 coding  | noncoding | noncoding | noncoding |
| MSTRG. 78136. 1 | LINC00992    | XLOC_076000 | 307 coding  | coding    | noncoding | noncoding |
| MSTRG. 78141. 1 |              | XLOC_076020 | 302 coding  | noncoding | noncoding | noncoding |
| MSTRG. 78245. 1 | LOC105379143 | XLOC_076061 | 215 coding  | noncoding | noncoding | noncoding |
| MSTRG. 78250. 1 | DMXL1        | XLOC_076065 | 261 coding  | noncoding | noncoding | noncoding |
| MSTRG. 78253. 1 | DMXL1        | XLOC_076068 | 221 coding  | noncoding | noncoding | noncoding |
| MSTRG. 78258. 1 | DMXL1        | XLOC_076073 | 307 coding  | noncoding | noncoding | noncoding |
| MSTRG. 78235. 1 |              | XLOC_076138 | 286 coding  | noncoding | noncoding | noncoding |
| MSTRG. 78337. 1 |              | XLOC_076157 | 241 coding  | noncoding | noncoding | noncoding |
| MSTRG. 78418. 1 |              | XLOC_076191 | 208 coding  | noncoding | noncoding | noncoding |
| MSTRG. 78432. 1 |              | XLOC_076195 | 322 coding  | noncoding | noncoding | noncoding |
| MSTRG. 78439. 1 |              | XLOC_076199 | 226 coding  | noncoding | noncoding | noncoding |
| XM_011543741. 2 | SNCAIP       | XLOC_076226 | 3659 coding | coding    | coding    | coding    |
| MSTRG. 78649. 1 | SNCAIP       | XLOC_076227 | 293 coding  | noncoding | noncoding | noncoding |
| MSTRG. 78469. 1 |              | XLOC_076228 | 254 coding  | noncoding | noncoding | noncoding |
| MSTRG. 78643. 1 |              | XLOC_076234 | 259 coding  | noncoding | noncoding | noncoding |
| MSTRG. 78684. 1 | LOC105379154 | XLOC_076240 | 234 coding  | noncoding | noncoding | noncoding |
| MSTRG. 78699. 1 | SNX24        | XLOC_076250 | 278 coding  | noncoding | noncoding | noncoding |
| MSTRG. 78712. 1 |              | XLOC_076258 | 284 coding  | coding    | noncoding | noncoding |
| NM_001364150. 2 | CSNK1G3      | XLOC_076267 | 4525 coding | coding    | coding    | coding    |
| XM_017009062. 1 | CSNK1G3      | XLOC_076267 | 4096 coding | coding    | coding    | coding    |
| MSTRG. 78817. 1 | CSNK1G3      | XLOC_076270 | 291 coding  | noncoding | noncoding | noncoding |
| MSTRG. 78743. 1 |              | XLOC_076286 | 244 coding  | noncoding | noncoding | noncoding |
| MSTRG. 78760. 1 |              | XLOC_076292 | 282 coding  | noncoding | noncoding | noncoding |
| MSTRG. 78790. 1 | LINC01170    | XLOC_076299 | 264 coding  | noncoding | noncoding | noncoding |
| MSTRG. 78837. 1 |              | XLOC_076343 | 286 coding  | noncoding | noncoding | noncoding |
| MSTRG. 78892. 1 |              | XLOC_076352 | 304 coding  | coding    | noncoding | noncoding |
| MSTRG. 78896. 1 |              | XLOC_076355 | 312 coding  | noncoding | noncoding | noncoding |
| MSTRG. 78898. 1 |              | XLOC_076357 | 264 coding  | noncoding | noncoding | noncoding |
| MSTRG. 78900. 1 |              | XLOC_076358 | 318 coding  | noncoding | noncoding | noncoding |
| MSTRG. 78943. 1 | ALDH7A1      | XLOC_076392 | 274 coding  | noncoding | noncoding | noncoding |
| MSTRG. 78949. 1 | PHAX         | XLOC_076396 | 242 coding  | noncoding | noncoding | noncoding |
| MSTRG. 78937. 1 |              | XLOC_076398 | 357 coding  | noncoding | noncoding | noncoding |
| MSTRG. 78939. 1 |              | XLOC_076399 | 228 coding  | noncoding | noncoding | noncoding |
| MSTRG. 79049. 1 | LOC105379163 | XLOC_076409 | 234 coding  | noncoding | noncoding | noncoding |
| MSTRG. 79067. 1 |              | XLOC_076493 | 239 coding  | noncoding | noncoding | noncoding |
| MSTRG. 79264. 1 |              | XLOC_076536 | 353 coding  | noncoding | noncoding | noncoding |
| MSTRG. 79269. 1 |              | XLOC_076538 | 292 coding  | noncoding | noncoding | noncoding |
| MSTRG. 79272. 1 |              | XLOC_076540 | 277 coding  | noncoding | noncoding | noncoding |

|                 |              |             |             |           |           |           |
|-----------------|--------------|-------------|-------------|-----------|-----------|-----------|
| MSTRG. 79277. 1 |              | XLOC_076542 | 317 coding  | noncoding | noncoding | noncoding |
| MSTRG. 79287. 1 |              | XLOC_076547 | 237 coding  | noncoding | noncoding | noncoding |
| MSTRG. 79291. 1 |              | XLOC_076549 | 288 coding  | noncoding | noncoding | noncoding |
| MSTRG. 79292. 1 |              | XLOC_076550 | 269 coding  | noncoding | noncoding | noncoding |
| MSTRG. 79294. 2 | HINT1        | XLOC_076552 | 586 coding  | coding    | noncoding | noncoding |
| NM_001038702. 1 | CDC42SE2     | XLOC_076557 | 3488 coding | noncoding | noncoding | noncoding |
| XM_017009649. 2 | CDC42SE2     | XLOC_076557 | 3515 coding | noncoding | noncoding | noncoding |
| XM_017009648. 2 | CDC42SE2     | XLOC_076557 | 3665 coding | noncoding | noncoding | noncoding |
| MSTRG. 79530. 2 | SLC22A4      | XLOC_076602 | 2164 coding | coding    | coding    | coding    |
| NM_001354992. 2 | IL13         | XLOC_076614 | 1454 coding | coding    | coding    | noncoding |
| MSTRG. 79487. 1 |              | XLOC_076642 | 257 coding  | noncoding | noncoding | noncoding |
| MSTRG. 79490. 1 |              | XLOC_076643 | 282 coding  | noncoding | noncoding | noncoding |
| MSTRG. 79522. 1 | HSPA4        | XLOC_076648 | 299 coding  | noncoding | noncoding | noncoding |
| MSTRG. 79515. 1 |              | XLOC_076651 | 282 coding  | noncoding | noncoding | noncoding |
| MSTRG. 79593. 1 | FSTL4        | XLOC_076666 | 615 coding  | noncoding | noncoding | noncoding |
| MSTRG. 79648. 2 | PPP2CA       | XLOC_076699 | 2278 coding | coding    | noncoding | noncoding |
| MSTRG. 79778. 6 | C5orf66      | XLOC_076745 | 1904 coding | coding    | coding    | coding    |
| XR_001742007. 1 | SLC25A48     | XLOC_076756 | 7323 coding | coding    | coding    | coding    |
| MSTRG. 79756. 1 |              | XLOC_076760 | 278 coding  | noncoding | noncoding | noncoding |
| MSTRG. 79834. 1 | TRPC7        | XLOC_076785 | 280 coding  | noncoding | noncoding | noncoding |
| MSTRG. 79825. 1 |              | XLOC_076789 | 321 coding  | noncoding | noncoding | noncoding |
| MSTRG. 79842. 1 |              | XLOC_076791 | 289 coding  | noncoding | noncoding | noncoding |
| MSTRG. 80009. 1 | WNT8A        | XLOC_076911 | 216 coding  | noncoding | noncoding | noncoding |
| NR_146628. 1    | LOC100128966 | XLOC_076915 | 551 coding  | noncoding | noncoding | coding    |
| XM_011543488. 2 | KDM3B        | XLOC_076919 | 6528 coding | coding    | coding    | coding    |
| MSTRG. 80056. 1 | KDM3B        | XLOC_076920 | 245 coding  | noncoding | noncoding | noncoding |
| MSTRG. 80061. 1 | KDM3B        | XLOC_076925 | 355 coding  | noncoding | noncoding | noncoding |
| MSTRG. 80130. 1 | CTNNA1       | XLOC_076942 | 286 coding  | noncoding | noncoding | noncoding |
| MSTRG. 80082. 1 |              | XLOC_076961 | 271 coding  | noncoding | noncoding | noncoding |
| NM_001194955. 1 | MATR3        | XLOC_076962 | 5282 coding | noncoding | coding    | coding    |
| XM_017009522. 1 | PAIP2        | XLOC_076969 | 2886 coding | coding    | coding    | coding    |
| MSTRG. 80107. 1 |              | XLOC_076979 | 216 coding  | noncoding | noncoding | noncoding |
| MSTRG. 80111. 1 |              | XLOC_076982 | 279 coding  | noncoding | noncoding | noncoding |
| MSTRG. 80178. 1 | UBE2D2       | XLOC_076986 | 491 coding  | noncoding | noncoding | noncoding |
| MSTRG. 80171. 1 | PSD2         | XLOC_076995 | 316 coding  | noncoding | noncoding | noncoding |
| MSTRG. 80196. 1 | NRG2         | XLOC_076996 | 297 coding  | coding    | noncoding | noncoding |
| MSTRG. 80205. 1 | NRG2         | XLOC_077001 | 289 coding  | noncoding | noncoding | noncoding |
| MSTRG. 80297. 2 | APBB3        | XLOC_077042 | 2401 coding | coding    | coding    | coding    |
| XM_011537668. 2 | TMCO6        | XLOC_077048 | 1644 coding | coding    | coding    | coding    |
| XM_005268469. 3 | WDR55        | XLOC_077056 | 4121 coding | coding    | coding    | coding    |
| NM_031861. 2    | PCDHA11      | XLOC_077062 | 4088 coding | coding    | coding    | coding    |
| NM_031864. 3    | PCDHA12      | XLOC_077062 | 2582 coding | coding    | coding    | coding    |
| MSTRG. 80259. 1 | PCDHA11      | XLOC_077064 | 447 coding  | noncoding | noncoding | noncoding |

|                |              |             |              |           |           |           |
|----------------|--------------|-------------|--------------|-----------|-----------|-----------|
| NM_018937.4    | PCDHB3       | XLOC_077069 | 3586 coding  | coding    | coding    | coding    |
| NM_019120.5    | PCDHB8       | XLOC_077075 | 2750 coding  | coding    | coding    | coding    |
| NM_019119.5    | PCDHB9       | XLOC_077077 | 4381 coding  | coding    | coding    | coding    |
| NM_032053.3    | PCDHGA4      | XLOC_077098 | 2713 coding  | coding    | coding    | coding    |
| MSTRG.80424.6  | DIAPH1       | XLOC_077100 | 3161 coding  | coding    | coding    | coding    |
| MSTRG.80334.1  |              | XLOC_077114 | 438 coding   | noncoding | noncoding | noncoding |
| MSTRG.80364.1  |              | XLOC_077137 | 315 coding   | noncoding | noncoding | noncoding |
| MSTRG.80371.1  | SPRY4-AS1    | XLOC_077142 | 225 coding   | noncoding | noncoding | noncoding |
| MSTRG.81085.1  | ARHGAP26     | XLOC_077241 | 282 coding   | noncoding | noncoding | noncoding |
| MSTRG.81160.1  |              | XLOC_077316 | 266 coding   | noncoding | noncoding | noncoding |
| MSTRG.80512.1  |              | XLOC_077365 | 236 coding   | noncoding | noncoding | noncoding |
| MSTRG.80555.1  |              | XLOC_077376 | 230 coding   | noncoding | noncoding | noncoding |
| MSTRG.80643.1  | PRELID2      | XLOC_077401 | 229 coding   | noncoding | noncoding | noncoding |
| XM_017008982.2 | TCERG1       | XLOC_077434 | 4250 coding  | coding    | coding    | coding    |
| MSTRG.80682.1  |              | XLOC_077444 | 310 coding   | noncoding | noncoding | noncoding |
| MSTRG.80715.1  | STK32A       | XLOC_077460 | 206 coding   | noncoding | noncoding | noncoding |
| MSTRG.80736.1  |              | XLOC_077491 | 245 coding   | noncoding | noncoding | noncoding |
| XM_017009899.1 | FBXO38       | XLOC_077523 | 4561 coding  | coding    | coding    | coding    |
| NM_205836.3    | FBXO38       | XLOC_077523 | 4401 coding  | coding    | coding    | coding    |
| MSTRG.80878.12 | FBXO38       | XLOC_077523 | 613 coding   | noncoding | coding    | coding    |
| MSTRG.80932.1  |              | XLOC_077552 | 281 coding   | noncoding | noncoding | noncoding |
| MSTRG.80846.1  |              | XLOC_077568 | 205 coding   | coding    | noncoding | noncoding |
| MSTRG.80910.1  | SH3TC2-DT    | XLOC_077575 | 287 coding   | noncoding | noncoding | noncoding |
| MSTRG.80927.1  | AFAP1L1      | XLOC_077585 | 265 coding   | noncoding | noncoding | noncoding |
| MSTRG.80970.5  | CSNK1A1      | XLOC_077595 | 1815 coding  | coding    | noncoding | noncoding |
| NM_001172699.1 | PPARGC1B     | XLOC_077602 | 10541 coding | coding    | coding    | coding    |
| MSTRG.81199.1  | PDE6A        | XLOC_077610 | 220 coding   | noncoding | noncoding | noncoding |
| MSTRG.80988.1  |              | XLOC_077612 | 253 coding   | noncoding | noncoding | noncoding |
| MSTRG.81221.1  | CAMK2A       | XLOC_077628 | 303 coding   | noncoding | noncoding | noncoding |
| MSTRG.81217.1  |              | XLOC_077631 | 234 coding   | noncoding | noncoding | noncoding |
| MSTRG.81252.1  | TCOF1        | XLOC_077634 | 254 coding   | noncoding | noncoding | noncoding |
| MSTRG.81264.1  | NDST1-AS1    | XLOC_077638 | 305 coding   | noncoding | noncoding | noncoding |
| MSTRG.81256.1  |              | XLOC_077644 | 449 coding   | noncoding | noncoding | noncoding |
| MSTRG.81323.8  | TNIP1        | XLOC_077672 | 2283 coding  | noncoding | coding    | coding    |
| MSTRG.81340.1  |              | XLOC_077684 | 318 coding   | noncoding | noncoding | noncoding |
| MSTRG.81384.1  | LOC105378234 | XLOC_077685 | 270 coding   | noncoding | noncoding | noncoding |
| MSTRG.81410.1  | FAT2         | XLOC_077690 | 225 coding   | noncoding | noncoding | noncoding |
| NM_198395.2    | G3BP1        | XLOC_077703 | 10196 coding | coding    | coding    | coding    |
| MSTRG.81422.1  |              | XLOC_077708 | 249 coding   | noncoding | noncoding | noncoding |
| MSTRG.81428.1  | GLRA1        | XLOC_077710 | 475 coding   | noncoding | noncoding | noncoding |
| MSTRG.81451.1  | LINC01933    | XLOC_077718 | 221 coding   | noncoding | noncoding | noncoding |
| MSTRG.81472.1  | LINC01933    | XLOC_077725 | 246 coding   | noncoding | noncoding | noncoding |
| MSTRG.81436.1  |              | XLOC_077729 | 439 coding   | noncoding | noncoding | noncoding |

|                 |              |             |              |           |           |           |
|-----------------|--------------|-------------|--------------|-----------|-----------|-----------|
| MSTRG. 81479. 1 | LINC01470    | XLOC_077731 | 446 coding   | coding    | noncoding | noncoding |
| MSTRG. 81482. 1 | LINC01470    | XLOC_077733 | 432 coding   | noncoding | noncoding | noncoding |
| MSTRG. 81483. 1 | LINC01470    | XLOC_077734 | 252 coding   | noncoding | noncoding | noncoding |
| MSTRG. 81486. 1 | LINC01470    | XLOC_077736 | 289 coding   | noncoding | noncoding | noncoding |
| MSTRG. 81477. 1 |              | XLOC_077739 | 305 coding   | noncoding | noncoding | noncoding |
| MSTRG. 81541. 1 |              | XLOC_077773 | 323 coding   | noncoding | noncoding | noncoding |
| MSTRG. 81553. 1 |              | XLOC_077789 | 399 coding   | coding    | noncoding | noncoding |
| XM_011537616. 1 | LARP1        | XLOC_077792 | 6491 coding  | coding    | coding    | coding    |
| MSTRG. 81583. 1 | LARP1        | XLOC_077794 | 265 coding   | noncoding | noncoding | noncoding |
| MSTRG. 81588. 1 | LARP1        | XLOC_077796 | 274 coding   | noncoding | noncoding | noncoding |
| MSTRG. 81599. 6 | FAXDC2       | XLOC_077802 | 1472 coding  | coding    | coding    | noncoding |
| MSTRG. 81628. 1 |              | XLOC_077825 | 222 coding   | noncoding | noncoding | noncoding |
| MSTRG. 81636. 1 |              | XLOC_077829 | 397 coding   | noncoding | noncoding | noncoding |
| XM_017009443. 1 | ITK          | XLOC_077887 | 4065 coding  | coding    | coding    | coding    |
| MSTRG. 81728. 1 |              | XLOC_077931 | 231 coding   | noncoding | noncoding | noncoding |
| MSTRG. 81733. 1 |              | XLOC_077939 | 252 coding   | noncoding | noncoding | noncoding |
| MSTRG. 81741. 1 | LOC107986466 | XLOC_077942 | 262 coding   | noncoding | noncoding | noncoding |
| MSTRG. 81771. 1 |              | XLOC_077955 | 283 coding   | noncoding | noncoding | noncoding |
| MSTRG. 81830. 1 |              | XLOC_077975 | 213 coding   | noncoding | noncoding | noncoding |
| XM_011534437. 2 | ADRA1B       | XLOC_077997 | 3798 coding  | coding    | coding    | coding    |
| MSTRG. 81929. 1 | PWWP2A       | XLOC_078004 | 254 coding   | noncoding | noncoding | noncoding |
| MSTRG. 82000. 4 | SLU7         | XLOC_078037 | 2521 coding  | coding    | noncoding | noncoding |
| MSTRG. 81992. 1 |              | XLOC_078040 | 282 coding   | noncoding | noncoding | noncoding |
| MSTRG. 82066. 1 | ATP10B       | XLOC_078051 | 259 coding   | noncoding | noncoding | noncoding |
| MSTRG. 82027. 1 | GABRB2       | XLOC_078061 | 208 coding   | noncoding | noncoding | noncoding |
| MSTRG. 82035. 1 | GABRB2       | XLOC_078065 | 247 coding   | noncoding | noncoding | noncoding |
| MSTRG. 82084. 1 |              | XLOC_078075 | 257 coding   | noncoding | noncoding | noncoding |
| MSTRG. 82093. 1 |              | XLOC_078081 | 210 coding   | noncoding | noncoding | noncoding |
| MSTRG. 82114. 1 |              | XLOC_078092 | 240 coding   | noncoding | noncoding | noncoding |
| MSTRG. 82213. 1 | LOC105377703 | XLOC_078138 | 345 coding   | noncoding | noncoding | noncoding |
| MSTRG. 82197. 1 |              | XLOC_078144 | 206 coding   | noncoding | noncoding | noncoding |
| MSTRG. 82233. 1 |              | XLOC_078152 | 266 coding   | noncoding | noncoding | noncoding |
| MSTRG. 82235. 1 |              | XLOC_078154 | 293 coding   | noncoding | noncoding | noncoding |
| MSTRG. 82242. 1 |              | XLOC_078159 | 292 coding   | noncoding | noncoding | noncoding |
| MSTRG. 82364. 1 |              | XLOC_078170 | 245 coding   | noncoding | noncoding | noncoding |
| MSTRG. 82370. 1 |              | XLOC_078173 | 240 coding   | noncoding | noncoding | noncoding |
| XM_017009660. 1 | TENM2        | XLOC_078178 | 10321 coding | coding    | noncoding | coding    |
| MSTRG. 82412. 1 | TENM2        | XLOC_078182 | 272 coding   | noncoding | noncoding | noncoding |
| MSTRG. 82416. 1 | TENM2        | XLOC_078184 | 256 coding   | noncoding | noncoding | noncoding |
| MSTRG. 82419. 1 | TENM2        | XLOC_078186 | 325 coding   | noncoding | noncoding | noncoding |
| MSTRG. 82443. 1 | TENM2        | XLOC_078196 | 268 coding   | noncoding | noncoding | noncoding |
| MSTRG. 82451. 1 | TENM2        | XLOC_078202 | 258 coding   | noncoding | noncoding | noncoding |
| MSTRG. 82453. 1 | TENM2        | XLOC_078203 | 235 coding   | noncoding | noncoding | noncoding |

|                 |              |             |              |           |           |           |
|-----------------|--------------|-------------|--------------|-----------|-----------|-----------|
| MSTRG. 82383. 1 |              | XLOC_078206 | 279 coding   | noncoding | noncoding | noncoding |
| MSTRG. 82392. 1 | WWC1         | XLOC_078211 | 221 coding   | noncoding | noncoding | noncoding |
| MSTRG. 82393. 1 | WWC1         | XLOC_078212 | 271 coding   | noncoding | noncoding | noncoding |
| MSTRG. 82493. 1 | SLIT3        | XLOC_078235 | 297 coding   | noncoding | noncoding | noncoding |
| MSTRG. 82465. 1 |              | XLOC_078242 | 361 coding   | coding    | noncoding | noncoding |
| MSTRG. 82466. 1 |              | XLOC_078243 | 269 coding   | noncoding | noncoding | noncoding |
| MSTRG. 82467. 1 |              | XLOC_078244 | 297 coding   | noncoding | noncoding | noncoding |
| MSTRG. 82470. 1 |              | XLOC_078251 | 816 coding   | coding    | noncoding | coding    |
| MSTRG. 82518. 1 |              | XLOC_078357 | 280 coding   | noncoding | noncoding | noncoding |
| MSTRG. 82584. 1 | RANBP17      | XLOC_078396 | 228 coding   | noncoding | noncoding | noncoding |
| MSTRG. 82570. 1 |              | XLOC_078401 | 252 coding   | noncoding | noncoding | noncoding |
| NM_001355006. 1 | NPM1         | XLOC_078402 | 1339 coding  | coding    | coding    | coding    |
| MSTRG. 82719. 1 | LOC105377729 | XLOC_078469 | 464 coding   | noncoding | noncoding | noncoding |
| MSTRG. 82751. 1 | LOC101928093 | XLOC_078477 | 270 coding   | noncoding | noncoding | noncoding |
| MSTRG. 82888. 1 | ERGIC1       | XLOC_078489 | 288 coding   | noncoding | noncoding | noncoding |
| MSTRG. 82874. 1 |              | XLOC_078499 | 322 coding   | noncoding | noncoding | noncoding |
| MSTRG. 82914. 1 | NKX2-5       | XLOC_078507 | 210 coding   | noncoding | noncoding | noncoding |
| MSTRG. 82932. 1 |              | XLOC_078526 | 239 coding   | noncoding | noncoding | noncoding |
| MSTRG. 82937. 1 |              | XLOC_078529 | 287 coding   | noncoding | noncoding | noncoding |
| NM_015980. 5    | NSG2         | XLOC_078557 | 2350 coding  | coding    | coding    | coding    |
| MSTRG. 83026. 1 | LINC01411    | XLOC_078569 | 362 coding   | noncoding | noncoding | noncoding |
| MSTRG. 83028. 1 | LOC105377739 | XLOC_078570 | 266 coding   | noncoding | noncoding | noncoding |
| MSTRG. 83033. 1 |              | XLOC_078573 | 238 coding   | noncoding | noncoding | noncoding |
| MSTRG. 83034. 1 |              | XLOC_078574 | 262 coding   | noncoding | noncoding | noncoding |
| MSTRG. 83037. 1 |              | XLOC_078575 | 261 coding   | noncoding | noncoding | noncoding |
| MSTRG. 83039. 1 |              | XLOC_078576 | 220 coding   | noncoding | noncoding | noncoding |
| MSTRG. 83064. 1 |              | XLOC_078591 | 580 coding   | noncoding | noncoding | noncoding |
| NM_006650. 4    | CPLX2        | XLOC_078612 | 4801 coding  | coding    | coding    | coding    |
| MSTRG. 83097. 1 | LOC100996385 | XLOC_078653 | 261 coding   | noncoding | coding    | noncoding |
| NR_038402. 1    | LOC100507387 | XLOC_078658 | 967 coding   | noncoding | coding    | noncoding |
| NM_001317948. 1 | ARL10        | XLOC_078661 | 1631 coding  | coding    | coding    | coding    |
| NM_173664. 6    | ARL10        | XLOC_078661 | 10826 coding | coding    | coding    | coding    |
| MSTRG. 83164. 1 |              | XLOC_078666 | 259 coding   | noncoding | noncoding | noncoding |
| MSTRG. 83165. 1 |              | XLOC_078667 | 237 coding   | noncoding | noncoding | noncoding |
| MSTRG. 83211. 2 | RNF44        | XLOC_078671 | 5669 coding  | coding    | coding    | coding    |
| XM_017009298. 1 | ZNF346       | XLOC_078689 | 1832 coding  | coding    | coding    | coding    |
| MSTRG. 83270. 1 | ZNF346       | XLOC_078695 | 236 coding   | noncoding | noncoding | noncoding |
| MSTRG. 83271. 1 | ZNF346       | XLOC_078696 | 277 coding   | noncoding | noncoding | noncoding |
| MSTRG. 83272. 1 | ZNF346       | XLOC_078697 | 238 coding   | noncoding | noncoding | noncoding |
| MSTRG. 83229. 1 |              | XLOC_078707 | 266 coding   | noncoding | noncoding | noncoding |
| XR_941112. 2    | SLC34A1      | XLOC_078712 | 3969 coding  | coding    | coding    | coding    |
| MSTRG. 83274. 8 | SLC34A1      | XLOC_078712 | 237 coding   | noncoding | noncoding | noncoding |
| MSTRG. 83336. 7 | FAM193B      | XLOC_078731 | 612 coding   | noncoding | noncoding | noncoding |

|                 |              |             |             |           |           |           |
|-----------------|--------------|-------------|-------------|-----------|-----------|-----------|
| MSTRG. 83336. 8 | FAM193B      | XLOC_078731 | 598 coding  | noncoding | coding    | noncoding |
| NR_159407. 1    | FAM153CP     | XLOC_078758 | 1210 coding | coding    | coding    | coding    |
| NM_022762. 5    | RMND5B       | XLOC_078763 | 3911 coding | coding    | coding    | coding    |
| MSTRG. 83417. 1 | COL23A1      | XLOC_078779 | 203 coding  | noncoding | noncoding | noncoding |
| MSTRG. 83440. 1 | AACSP1       | XLOC_078793 | 324 coding  | noncoding | noncoding | noncoding |
| MSTRG. 83480. 1 |              | XLOC_078808 | 266 coding  | noncoding | noncoding | noncoding |
| MSTRG. 83487. 1 |              | XLOC_078811 | 338 coding  | noncoding | coding    | noncoding |
| XR_245277. 3    | RUFY1        | XLOC_078813 | 2219 coding | coding    | coding    | coding    |
| XR_001742278. 1 | RUFY1        | XLOC_078813 | 2784 coding | coding    | coding    | coding    |
| MSTRG. 83507. 1 |              | XLOC_078829 | 217 coding  | noncoding | noncoding | noncoding |
| MSTRG. 83518. 1 |              | XLOC_078842 | 241 coding  | noncoding | noncoding | noncoding |
| MSTRG. 83572. 1 |              | XLOC_078855 | 277 coding  | noncoding | noncoding | noncoding |
| MSTRG. 83587. 1 |              | XLOC_078865 | 248 coding  | noncoding | noncoding | noncoding |
| MSTRG. 83588. 1 |              | XLOC_078869 | 325 coding  | noncoding | noncoding | noncoding |
| MSTRG. 83599. 1 |              | XLOC_078873 | 282 coding  | noncoding | noncoding | noncoding |
| MSTRG. 83631. 2 | ZFP62        | XLOC_078885 | 1151 coding | noncoding | coding    | noncoding |
| MSTRG. 83631. 4 | ZFP62        | XLOC_078885 | 2041 coding | coding    | noncoding | coding    |
| MSTRG. 83655. 1 |              | XLOC_078899 | 460 coding  | noncoding | noncoding | noncoding |
| MSTRG. 83656. 1 |              | XLOC_078900 | 213 coding  | noncoding | noncoding | noncoding |
| MSTRG. 83633. 1 |              | XLOC_078904 | 253 coding  | noncoding | noncoding | noncoding |
| MSTRG. 83663. 2 | RACK1        | XLOC_078909 | 1148 coding | coding    | noncoding | coding    |
| NM_001005224. 1 | OR4F3        | XLOC_078926 | 939 coding  | coding    | coding    | coding    |
| MSTRG. 69766. 1 |              | XLOC_078928 | 308 coding  | noncoding | noncoding | noncoding |
| NM_145265. 3    | CCDC127      | XLOC_078930 | 9283 coding | noncoding | coding    | coding    |
| MSTRG. 69805. 5 | PDCD6        | XLOC_078939 | 1198 coding | coding    | noncoding | noncoding |
| MSTRG. 69777. 3 | EXOC3        | XLOC_078942 | 2610 coding | coding    | coding    | noncoding |
| XM_017010120. 1 | ZDHHC11B     | XLOC_078963 | 6103 coding | coding    | coding    | coding    |
| XM_017010114. 2 | ZDHHC11B     | XLOC_078963 | 5293 coding | coding    | coding    | coding    |
| XM_017009874. 2 | ZDHHC11      | XLOC_078965 | 3556 coding | noncoding | coding    | coding    |
| XR_002956181. 1 | ZDHHC11      | XLOC_078965 | 3444 coding | coding    | coding    | coding    |
| MSTRG. 69879. 1 | TRIP13       | XLOC_078970 | 297 coding  | noncoding | noncoding | noncoding |
| NR_104614. 1    | LOC100506688 | XLOC_078972 | 3517 coding | noncoding | coding    | coding    |
| MSTRG. 69880. 1 |              | XLOC_078995 | 225 coding  | noncoding | noncoding | noncoding |
| MSTRG. 69913. 1 | LOC728613    | XLOC_079000 | 252 coding  | noncoding | noncoding | noncoding |
| MSTRG. 69914. 1 | LOC728613    | XLOC_079001 | 218 coding  | coding    | noncoding | noncoding |
| NM_001278635. 1 | IRX4         | XLOC_079017 | 2403 coding | coding    | coding    | coding    |
| MSTRG. 69932. 1 | LOC112267947 | XLOC_079021 | 245 coding  | noncoding | noncoding | noncoding |
| MSTRG. 69945. 1 | LOC100506858 | XLOC_079028 | 577 coding  | noncoding | noncoding | noncoding |
| MSTRG. 69967. 1 |              | XLOC_079040 | 244 coding  | noncoding | noncoding | noncoding |
| MSTRG. 69976. 1 |              | XLOC_079043 | 412 coding  | noncoding | noncoding | noncoding |
| MSTRG. 70032. 1 |              | XLOC_079078 | 255 coding  | noncoding | noncoding | noncoding |
| MSTRG. 70099. 1 | ADAMTS16     | XLOC_079082 | 230 coding  | noncoding | noncoding | noncoding |
| MSTRG. 70107. 1 | ADAMTS16     | XLOC_079085 | 263 coding  | noncoding | noncoding | noncoding |

|                 |              |                    |              |           |           |           |
|-----------------|--------------|--------------------|--------------|-----------|-----------|-----------|
| MSTRG. 70054. 1 |              | XLOC_079093        | 235 coding   | noncoding | noncoding | noncoding |
| MSTRG. 70058. 1 |              | XLOC_079094        | 259 coding   | noncoding | noncoding | noncoding |
| MSTRG. 70069. 1 |              | XLOC_079100        | 293 coding   | noncoding | noncoding | noncoding |
| MSTRG. 70084. 1 |              | XLOC_079106        | 220 coding   | noncoding | noncoding | noncoding |
| MSTRG. 70155. 1 | LINC02102    | XLOC_079125        | 238 coding   | noncoding | noncoding | noncoding |
| MSTRG. 70201. 1 |              | XLOC_079139        | 241 coding   | noncoding | noncoding | noncoding |
| MSTRG. 70256. 1 |              | XLOC_079174        | 303 coding   | noncoding | noncoding | noncoding |
| MSTRG. 70276. 1 | LINC02226    | XLOC_079180        | 266 coding   | coding    | noncoding | noncoding |
| MSTRG. 70288. 1 | LOC101929307 | XLOC_079187        | 331 coding   | noncoding | noncoding | noncoding |
| MSTRG. 70321. 1 | LINC02112    | XLOC_079210        | 255 coding   | noncoding | noncoding | noncoding |
| MSTRG. 70403. 3 | CCT5         | XLOC_079223        | 1711 coding  | coding    | coding    | noncoding |
| MSTRG. 70374. 1 | LOC101929977 | XLOC_079227        | 239 coding   | noncoding | noncoding | noncoding |
| MSTRG. 70452. 1 |              | XLOC_079247        | 205 coding   | noncoding | noncoding | noncoding |
| MSTRG. 70479. 1 | DAP          | XLOC_079263        | 386 coding   | noncoding | noncoding | noncoding |
| MSTRG. 70506. 1 | CTNND2       | XLOC_079283        | 247 coding   | noncoding | noncoding | noncoding |
| MSTRG. 70509. 1 | CTNND2       | XLOC_079285        | 323 coding   | noncoding | noncoding | noncoding |
| MSTRG. 70512. 1 | CTNND2       | XLOC_079286        | 309 coding   | noncoding | noncoding | noncoding |
| MSTRG. 70527. 1 | CTNND2       | XLOC_079293        | 278 coding   | noncoding | coding    | noncoding |
| MSTRG. 70559. 1 | LINC01194    | XLOC_079320        | 456 coding   | noncoding | noncoding | noncoding |
| MSTRG. 70569. 1 | LINC02220    | XLOC_079323        | 685 coding   | noncoding | noncoding | noncoding |
| MSTRG. 70575. 1 | LINC02220    | XLOC_079327        | 240 coding   | noncoding | noncoding | noncoding |
| MSTRG. 70566. 1 |              | XLOC_079329        | 298 coding   | noncoding | coding    | noncoding |
| XM_024454388. 1 | DNAH5        | XLOC_079338        | 18329 coding | coding    | noncoding | coding    |
| MSTRG. 70615. 1 | DNAH5        | XLOC_079343        | 224 coding   | noncoding | noncoding | noncoding |
| MSTRG. 70604. 1 |              | XLOC_079346        | 391 coding   | noncoding | noncoding | noncoding |
| NM_054027. 6    | ANKH         | XLOC_079364        | 8207 coding  | coding    | coding    | coding    |
| MSTRG. 70639. 1 |              | XLOC_079381        | 290 coding   | noncoding | noncoding | noncoding |
| MSTRG. 70722. 1 | FBXL7        | XLOC_079403        | 219 coding   | noncoding | noncoding | noncoding |
| MSTRG. 70742. 1 |              | 11-Mar XLOC_079415 | 305 coding   | noncoding | noncoding | noncoding |
| XR_001742613. 1 | LOC105379640 | XLOC_079416        | 2397 coding  | noncoding | noncoding | noncoding |
| MSTRG. 70746. 1 |              | XLOC_079418        | 300 coding   | noncoding | noncoding | noncoding |
| MSTRG. 70777. 1 |              | XLOC_079456        | 264 coding   | noncoding | noncoding | noncoding |
| MSTRG. 70778. 1 |              | XLOC_079457        | 248 coding   | noncoding | noncoding | noncoding |
| MSTRG. 70809. 1 |              | XLOC_079460        | 271 coding   | noncoding | noncoding | noncoding |
| MSTRG. 70800. 1 |              | XLOC_079475        | 249 coding   | noncoding | noncoding | noncoding |
| MSTRG. 70806. 1 | LINC02111    | XLOC_079479        | 226 coding   | noncoding | noncoding | noncoding |
| MSTRG. 70890. 1 | LOC105374666 | XLOC_079506        | 268 coding   | noncoding | noncoding | noncoding |
| MSTRG. 70898. 1 | LINC02223    | XLOC_079515        | 641 coding   | noncoding | noncoding | noncoding |
| MSTRG. 70899. 1 | LINC02223    | XLOC_079516        | 726 coding   | noncoding | noncoding | noncoding |
| MSTRG. 70907. 1 |              | XLOC_079520        | 290 coding   | noncoding | noncoding | noncoding |
| MSTRG. 70947. 1 |              | XLOC_079527        | 231 coding   | noncoding | noncoding | noncoding |
| MSTRG. 71034. 1 | CDH18        | XLOC_079562        | 383 coding   | noncoding | noncoding | noncoding |
| MSTRG. 71040. 1 | CDH18        | XLOC_079565        | 400 coding   | noncoding | noncoding | noncoding |

|                 |              |             |             |           |           |           |
|-----------------|--------------|-------------|-------------|-----------|-----------|-----------|
| MSTRG. 71052. 1 | CDH18        | XLOC_079569 | 299 coding  | coding    | noncoding | noncoding |
| MSTRG. 71089. 1 |              | XLOC_079599 | 243 coding  | noncoding | noncoding | noncoding |
| MSTRG. 71177. 1 | CDH12        | XLOC_079645 | 277 coding  | noncoding | noncoding | noncoding |
| MSTRG. 71203. 1 | LOC107986377 | XLOC_079668 | 269 coding  | noncoding | noncoding | noncoding |
| MSTRG. 71216. 1 | C5orf17      | XLOC_079674 | 253 coding  | noncoding | noncoding | noncoding |
| MSTRG. 71232. 1 |              | XLOC_079688 | 297 coding  | noncoding | coding    | noncoding |
| MSTRG. 71241. 1 | CDH10        | XLOC_079692 | 252 coding  | noncoding | noncoding | noncoding |
| MSTRG. 71253. 1 |              | XLOC_079697 | 266 coding  | noncoding | noncoding | noncoding |
| MSTRG. 71263. 1 | LINC02228    | XLOC_079700 | 276 coding  | noncoding | noncoding | noncoding |
| MSTRG. 71291. 1 |              | XLOC_079719 | 389 coding  | noncoding | noncoding | noncoding |
| MSTRG. 71308. 1 |              | XLOC_079723 | 214 coding  | noncoding | noncoding | noncoding |
| MSTRG. 71314. 1 |              | XLOC_079726 | 292 coding  | noncoding | noncoding | noncoding |
| MSTRG. 71325. 1 |              | XLOC_079732 | 260 coding  | noncoding | noncoding | noncoding |
| MSTRG. 71343. 1 | CDH9         | XLOC_079738 | 274 coding  | noncoding | noncoding | noncoding |
| MSTRG. 71344. 1 | CDH9         | XLOC_079739 | 211 coding  | noncoding | noncoding | noncoding |
| MSTRG. 71357. 1 |              | XLOC_079750 | 445 coding  | noncoding | noncoding | noncoding |
| MSTRG. 71368. 1 |              | XLOC_079755 | 228 coding  | noncoding | noncoding | noncoding |
| MSTRG. 71429. 1 |              | XLOC_079791 | 262 coding  | noncoding | noncoding | noncoding |
| MSTRG. 71444. 1 |              | XLOC_079800 | 275 coding  | noncoding | noncoding | noncoding |
| MSTRG. 71449. 1 |              | XLOC_079804 | 215 coding  | noncoding | noncoding | noncoding |
| MSTRG. 71466. 1 | CDH6         | XLOC_079808 | 269 coding  | noncoding | noncoding | noncoding |
| MSTRG. 71471. 1 | CDH6         | XLOC_079811 | 318 coding  | noncoding | noncoding | noncoding |
| MSTRG. 71492. 1 | PDZD2        | XLOC_079819 | 450 coding  | noncoding | noncoding | noncoding |
| MSTRG. 71497. 1 | PDZD2        | XLOC_079823 | 227 coding  | noncoding | noncoding | noncoding |
| MSTRG. 71509. 1 | PDZD2        | XLOC_079828 | 240 coding  | noncoding | noncoding | noncoding |
| MSTRG. 71512. 1 | PDZD2        | XLOC_079830 | 356 coding  | noncoding | noncoding | noncoding |
| MSTRG. 71514. 1 | PDZD2        | XLOC_079832 | 286 coding  | noncoding | noncoding | noncoding |
| MSTRG. 71483. 1 |              | XLOC_079843 | 281 coding  | noncoding | noncoding | noncoding |
| MSTRG. 71525. 1 |              | XLOC_079850 | 270 coding  | noncoding | noncoding | noncoding |
| MSTRG. 71564. 1 | ZFR          | XLOC_079856 | 236 coding  | noncoding | noncoding | noncoding |
| MSTRG. 71552. 1 |              | XLOC_079861 | 311 coding  | noncoding | noncoding | noncoding |
| MSTRG. 71586. 1 | LINC02061    | XLOC_079877 | 251 coding  | noncoding | noncoding | noncoding |
| MSTRG. 71605. 1 |              | XLOC_079889 | 306 coding  | noncoding | noncoding | noncoding |
| MSTRG. 71607. 1 |              | XLOC_079890 | 268 coding  | noncoding | noncoding | noncoding |
| MSTRG. 71629. 1 |              | XLOC_079902 | 216 coding  | noncoding | noncoding | noncoding |
| NM_001012509. 4 | SLC45A2      | XLOC_079922 | 2775 coding | coding    | coding    | coding    |
| MSTRG. 71678. 1 |              | XLOC_079954 | 432 coding  | noncoding | coding    | noncoding |
| MSTRG. 71680. 1 |              | XLOC_079955 | 270 coding  | noncoding | noncoding | noncoding |
| MSTRG. 71693. 1 | RAI14        | XLOC_079961 | 263 coding  | noncoding | noncoding | noncoding |
| MSTRG. 71709. 1 |              | XLOC_079968 | 293 coding  | noncoding | noncoding | noncoding |
| MSTRG. 71757. 1 |              | XLOC_079990 | 225 coding  | noncoding | noncoding | noncoding |
| MSTRG. 71950. 1 | SLC1A3       | XLOC_080028 | 248 coding  | noncoding | noncoding | noncoding |
| MSTRG. 71919. 1 |              | XLOC_080039 | 275 coding  | noncoding | noncoding | noncoding |

|                 |              |             |              |           |           |           |
|-----------------|--------------|-------------|--------------|-----------|-----------|-----------|
| MSTRG. 72074. 4 | CPLANE1      | XLOC_080046 | 27802 coding | coding    | coding    | coding    |
| MSTRG. 71994. 1 |              | XLOC_080063 | 312 coding   | noncoding | noncoding | noncoding |
| NM_001364297. 1 | LIFR         | XLOC_080076 | 10570 coding | coding    | coding    | coding    |
| XM_017009312. 1 | RICTOR       | XLOC_080095 | 9470 coding  | coding    | coding    | coding    |
| MSTRG. 72096. 1 | C9           | XLOC_080139 | 322 coding   | noncoding | noncoding | noncoding |
| MSTRG. 72126. 1 |              | XLOC_080145 | 300 coding   | noncoding | noncoding | noncoding |
| MSTRG. 72143. 1 |              | XLOC_080154 | 700 coding   | noncoding | coding    | noncoding |
| MSTRG. 72159. 1 |              | XLOC_080161 | 279 coding   | noncoding | noncoding | noncoding |
| MSTRG. 72269. 1 |              | XLOC_080188 | 270 coding   | noncoding | noncoding | noncoding |
| XM_011514117. 3 | C6           | XLOC_080196 | 3873 coding  | coding    | coding    | coding    |
| MSTRG. 72288. 1 | C6           | XLOC_080197 | 245 coding   | noncoding | noncoding | noncoding |
| MSTRG. 72292. 1 | C6           | XLOC_080199 | 277 coding   | noncoding | noncoding | noncoding |
| NM_001005473. 3 | PLCXD3       | XLOC_080202 | 7706 coding  | noncoding | coding    | coding    |
| MSTRG. 72350. 1 | OXCT1        | XLOC_080217 | 416 coding   | noncoding | noncoding | noncoding |
| MSTRG. 72315. 2 | FBXO4        | XLOC_080224 | 578 coding   | coding    | noncoding | noncoding |
| MSTRG. 72302. 1 |              | XLOC_080229 | 311 coding   | noncoding | noncoding | noncoding |
| MSTRG. 72323. 1 | GHR          | XLOC_080236 | 277 coding   | noncoding | noncoding | noncoding |
| MSTRG. 72332. 1 | GHR          | XLOC_080240 | 280 coding   | noncoding | noncoding | noncoding |
| MSTRG. 72337. 1 | GHR          | XLOC_080243 | 287 coding   | noncoding | noncoding | noncoding |
| MSTRG. 72321. 1 |              | XLOC_080247 | 334 coding   | noncoding | noncoding | noncoding |
| MSTRG. 72375. 1 |              | XLOC_080262 | 291 coding   | noncoding | noncoding | noncoding |
| MSTRG. 72383. 1 |              | XLOC_080265 | 235 coding   | noncoding | noncoding | noncoding |
| MSTRG. 72429. 1 |              | XLOC_080303 | 293 coding   | coding    | noncoding | noncoding |
| MSTRG. 72482. 1 | CCL28        | XLOC_080306 | 706 coding   | noncoding | noncoding | noncoding |
| MSTRG. 72539. 6 | NNT          | XLOC_080318 | 670 coding   | coding    | noncoding | noncoding |
| MSTRG. 72512. 1 |              | XLOC_080333 | 318 coding   | noncoding | coding    | noncoding |
| MSTRG. 72516. 1 |              | XLOC_080335 | 275 coding   | noncoding | noncoding | noncoding |
| MSTRG. 72522. 1 |              | XLOC_080340 | 228 coding   | noncoding | noncoding | noncoding |
| MSTRG. 72523. 1 |              | XLOC_080341 | 233 coding   | noncoding | noncoding | noncoding |
| MSTRG. 72581. 1 |              | XLOC_080354 | 267 coding   | coding    | noncoding | noncoding |
| NM_021072. 4    | HCN1         | XLOC_080358 | 9933 coding  | coding    | coding    | coding    |
| MSTRG. 72839. 1 |              | XLOC_080415 | 314 coding   | coding    | noncoding | noncoding |
| MSTRG. 72849. 1 |              | XLOC_080422 | 298 coding   | noncoding | noncoding | noncoding |
| MSTRG. 72860. 1 |              | XLOC_080430 | 278 coding   | noncoding | noncoding | noncoding |
| MSTRG. 72881. 1 |              | XLOC_080443 | 203 coding   | noncoding | noncoding | noncoding |
| MSTRG. 72886. 1 | LOC105378961 | XLOC_080444 | 250 coding   | noncoding | noncoding | noncoding |
| MSTRG. 72900. 1 |              | XLOC_080452 | 266 coding   | coding    | noncoding | noncoding |
| MSTRG. 72901. 1 |              | XLOC_080453 | 232 coding   | noncoding | noncoding | noncoding |
| MSTRG. 72907. 1 | LOC105378963 | XLOC_080457 | 280 coding   | noncoding | noncoding | noncoding |
| MSTRG. 72924. 1 |              | XLOC_080481 | 299 coding   | noncoding | noncoding | noncoding |
| MSTRG. 72927. 1 |              | XLOC_080484 | 258 coding   | noncoding | noncoding | noncoding |
| MSTRG. 72948. 1 |              | XLOC_080489 | 300 coding   | noncoding | noncoding | noncoding |
| MSTRG. 72973. 1 |              | XLOC_080502 | 453 coding   | noncoding | noncoding | noncoding |

|                 |              |             |             |           |           |           |
|-----------------|--------------|-------------|-------------|-----------|-----------|-----------|
| MSTRG. 73402. 1 | LINC01033    | XLOC_080563 | 305 coding  | noncoding | noncoding | noncoding |
| MSTRG. 73403. 1 | LINC01033    | XLOC_080564 | 262 coding  | noncoding | noncoding | noncoding |
| MSTRG. 73019. 1 |              | XLOC_080565 | 246 coding  | noncoding | noncoding | noncoding |
| MSTRG. 73021. 1 |              | XLOC_080567 | 292 coding  | noncoding | noncoding | noncoding |
| MSTRG. 73022. 1 |              | XLOC_080568 | 237 coding  | noncoding | noncoding | noncoding |
| MSTRG. 73041. 3 | SNX18        | XLOC_080569 | 4976 coding | coding    | coding    | noncoding |
| MSTRG. 73115. 1 | CDC20B       | XLOC_080625 | 293 coding  | noncoding | noncoding | noncoding |
| MSTRG. 73159. 1 |              | XLOC_080666 | 253 coding  | noncoding | noncoding | noncoding |
| MSTRG. 73179. 1 |              | XLOC_080681 | 290 coding  | noncoding | noncoding | noncoding |
| MSTRG. 73305. 3 | MAP3K1       | XLOC_080707 | 4972 coding | coding    | coding    | noncoding |
| MSTRG. 73321. 1 |              | XLOC_080718 | 268 coding  | noncoding | noncoding | noncoding |
| MSTRG. 73323. 1 |              | XLOC_080719 | 239 coding  | noncoding | noncoding | noncoding |
| MSTRG. 73419. 1 |              | XLOC_080721 | 434 coding  | noncoding | noncoding | noncoding |
| MSTRG. 73406. 1 |              | XLOC_080726 | 207 coding  | coding    | noncoding | noncoding |
| MSTRG. 73410. 1 |              | XLOC_080728 | 304 coding  | noncoding | noncoding | noncoding |
| MSTRG. 73411. 1 |              | XLOC_080729 | 289 coding  | noncoding | noncoding | noncoding |
| NM_001017992. 4 | ACTBL2       | XLOC_080731 | 2794 coding | coding    | coding    | coding    |
| MSTRG. 73471. 1 |              | XLOC_080755 | 316 coding  | noncoding | noncoding | noncoding |
| MSTRG. 74670. 1 | PDE4D        | XLOC_080810 | 266 coding  | noncoding | noncoding | noncoding |
| MSTRG. 74782. 1 | PDE4D        | XLOC_080824 | 282 coding  | noncoding | noncoding | noncoding |
| MSTRG. 74860. 1 | PDE4D        | XLOC_080834 | 220 coding  | noncoding | noncoding | noncoding |
| NM_001104558. 1 | ELOVL7       | XLOC_080845 | 3830 coding | coding    | coding    | coding    |
| MSTRG. 73567. 1 | ERCC8        | XLOC_080848 | 245 coding  | noncoding | noncoding | noncoding |
| MSTRG. 73538. 1 | LOC105378998 | XLOC_080885 | 288 coding  | noncoding | noncoding | noncoding |
| MSTRG. 73542. 1 | LOC105378998 | XLOC_080887 | 269 coding  | noncoding | noncoding | noncoding |
| MSTRG. 73543. 1 | LOC105378998 | XLOC_080888 | 297 coding  | noncoding | noncoding | noncoding |
| MSTRG. 73650. 1 | LOC107986418 | XLOC_080908 | 254 coding  | noncoding | noncoding | noncoding |
| MSTRG. 73647. 1 |              | XLOC_080914 | 301 coding  | noncoding | noncoding | noncoding |
| XR_001742672. 1 | LOC107986416 | XLOC_080916 | 1970 coding | noncoding | noncoding | noncoding |
| MSTRG. 73665. 1 |              | XLOC_080918 | 296 coding  | coding    | noncoding | noncoding |
| MSTRG. 73673. 1 |              | XLOC_080924 | 252 coding  | noncoding | noncoding | noncoding |
| NM_000524. 3    | HTR1A        | XLOC_080925 | 2245 coding | coding    | coding    | coding    |
| MSTRG. 73762. 1 | RNF180       | XLOC_080931 | 246 coding  | noncoding | noncoding | noncoding |
| MSTRG. 73764. 1 | RNF180       | XLOC_080933 | 235 coding  | noncoding | noncoding | noncoding |
| MSTRG. 73766. 1 | RNF180       | XLOC_080934 | 309 coding  | noncoding | noncoding | noncoding |
| MSTRG. 73768. 1 |              | XLOC_080936 | 255 coding  | noncoding | noncoding | noncoding |
| MSTRG. 73773. 1 | RGS7BP       | XLOC_080938 | 338 coding  | noncoding | noncoding | noncoding |
| MSTRG. 73790. 1 | ADAMTS6      | XLOC_080949 | 390 coding  | noncoding | noncoding | noncoding |
| MSTRG. 73826. 1 | ADAMTS6      | XLOC_080956 | 302 coding  | noncoding | noncoding | noncoding |
| MSTRG. 73878. 6 | TRAPPC13     | XLOC_080961 | 903 coding  | coding    | noncoding | noncoding |
| MSTRG. 73865. 1 |              | XLOC_080970 | 235 coding  | noncoding | noncoding | noncoding |
| MSTRG. 73922. 1 |              | XLOC_080996 | 305 coding  | coding    | noncoding | noncoding |
| MSTRG. 73956. 1 |              | XLOC_081010 | 308 coding  | noncoding | noncoding | noncoding |

|                 |              |             |             |           |           |           |
|-----------------|--------------|-------------|-------------|-----------|-----------|-----------|
| MSTRG. 73987. 1 |              | XLOC_081059 | 208 coding  | noncoding | noncoding | noncoding |
| MSTRG. 74000. 1 |              | XLOC_081067 | 276 coding  | noncoding | noncoding | noncoding |
| MSTRG. 74004. 1 |              | XLOC_081070 | 225 coding  | noncoding | noncoding | noncoding |
| MSTRG. 74012. 1 |              | XLOC_081075 | 261 coding  | noncoding | noncoding | noncoding |
| MSTRG. 74026. 1 | LINC02219    | XLOC_081081 | 268 coding  | noncoding | noncoding | noncoding |
| MSTRG. 74076. 3 | PIK3R1       | XLOC_081084 | 3991 coding | coding    | noncoding | noncoding |
| XR_002956214. 1 | LOC105379011 | XLOC_081093 | 8128 coding | noncoding | noncoding | noncoding |
| MSTRG. 74056. 1 |              | XLOC_081100 | 261 coding  | noncoding | noncoding | noncoding |
| MSTRG. 74070. 1 | LINC02198    | XLOC_081106 | 315 coding  | noncoding | noncoding | noncoding |
| MSTRG. 74163. 2 | SLC30A5      | XLOC_081110 | 2591 coding | coding    | noncoding | noncoding |
| MSTRG. 74161. 1 |              | XLOC_081111 | 362 coding  | noncoding | noncoding | noncoding |
| MSTRG. 74190. 2 |              | XLOC_081127 | 1876 coding | noncoding | noncoding | noncoding |
| MSTRG. 74183. 1 | GUSBP3       | XLOC_081128 | 4976 coding | coding    | coding    | noncoding |
| NM_001346870. 1 | NAIP         | XLOC_081161 | 6523 coding | coding    | coding    | coding    |
| MSTRG. 74238. 1 | LOC107986382 | XLOC_081181 | 219 coding  | noncoding | noncoding | noncoding |
| XR_001742729. 2 | LOC105379028 | XLOC_081186 | 7996 coding | noncoding | coding    | noncoding |
| MSTRG. 74337. 1 | LOC105379028 | XLOC_081187 | 267 coding  | noncoding | noncoding | noncoding |
| MSTRG. 74341. 1 | MAP1B        | XLOC_081188 | 452 coding  | noncoding | noncoding | noncoding |
| MSTRG. 74401. 1 |              | XLOC_081220 | 325 coding  | noncoding | noncoding | noncoding |
| MSTRG. 74458. 5 | FCHO2        | XLOC_081230 | 1892 coding | coding    | noncoding | noncoding |
| MSTRG. 74458. 6 | FCHO2        | XLOC_081230 | 2346 coding | coding    | noncoding | noncoding |
| NM_004472. 3    | FOXD1        | XLOC_081243 | 2512 coding | coding    | coding    | coding    |
| MSTRG. 74450. 1 | LINC01386    | XLOC_081245 | 259 coding  | noncoding | noncoding | noncoding |
| MSTRG. 74456. 1 |              | XLOC_081248 | 282 coding  | noncoding | noncoding | noncoding |
| MSTRG. 74564. 1 | ARHGEF28     | XLOC_081281 | 257 coding  | noncoding | noncoding | noncoding |
| MSTRG. 74572. 1 | LOC105379039 | XLOC_081316 | 309 coding  | noncoding | noncoding | noncoding |
| MSTRG. 74569. 1 |              | XLOC_081317 | 280 coding  | noncoding | noncoding | noncoding |
| MSTRG. 74574. 1 |              | XLOC_081318 | 244 coding  | noncoding | noncoding | noncoding |
| MSTRG. 74575. 1 |              | XLOC_081319 | 489 coding  | noncoding | noncoding | noncoding |
| MSTRG. 74609. 1 | ANKRD31      | XLOC_081332 | 257 coding  | noncoding | noncoding | noncoding |
| MSTRG. 74909. 1 |              | XLOC_081355 | 270 coding  | noncoding | noncoding | noncoding |
| MSTRG. 74918. 1 | SV2C         | XLOC_081357 | 267 coding  | noncoding | noncoding | noncoding |
| MSTRG. 75025. 3 | IQGAP2       | XLOC_081371 | 5428 coding | coding    | coding    | noncoding |
| MSTRG. 74950. 1 |              | XLOC_081381 | 251 coding  | noncoding | noncoding | noncoding |
| MSTRG. 75110. 1 | PDE8B        | XLOC_081408 | 322 coding  | noncoding | noncoding | noncoding |
| MSTRG. 75085. 1 |              | XLOC_081436 | 236 coding  | coding    | noncoding | noncoding |
| MSTRG. 75087. 1 |              | XLOC_081437 | 286 coding  | noncoding | noncoding | noncoding |
| MSTRG. 75167. 1 | AP3B1        | XLOC_081473 | 266 coding  | noncoding | noncoding | noncoding |
| MSTRG. 75172. 1 | AP3B1        | XLOC_081478 | 244 coding  | noncoding | noncoding | noncoding |
| MSTRG. 75175. 1 | AP3B1        | XLOC_081481 | 263 coding  | noncoding | noncoding | noncoding |
| XR_001742065. 2 | ARSB         | XLOC_081506 | 4917 coding | coding    | coding    | coding    |
| MSTRG. 75290. 1 | ARSB         | XLOC_081512 | 244 coding  | noncoding | noncoding | noncoding |
| MSTRG. 75294. 1 | ARSB         | XLOC_081516 | 264 coding  | noncoding | noncoding | noncoding |

|                  |              |             |              |           |           |           |
|------------------|--------------|-------------|--------------|-----------|-----------|-----------|
| MSTRG. 75185. 1  | DMGDH        | XLOC_081518 | 207 coding   | noncoding | noncoding | noncoding |
| MSTRG. 75226. 3  | JMY          | XLOC_081522 | 1743 coding  | noncoding | coding    | coding    |
| MSTRG. 75208. 1  | HOMER1       | XLOC_081532 | 249 coding   | noncoding | noncoding | noncoding |
| MSTRG. 75191. 1  |              | XLOC_081533 | 405 coding   | noncoding | noncoding | noncoding |
| MSTRG. 75194. 1  |              | XLOC_081534 | 386 coding   | noncoding | noncoding | noncoding |
| MSTRG. 75344. 1  | CMYA5        | XLOC_081550 | 306 coding   | noncoding | coding    | noncoding |
| MSTRG. 75345. 1  | CMYA5        | XLOC_081551 | 225 coding   | noncoding | noncoding | noncoding |
| MSTRG. 75352. 1  | LOC105379048 | XLOC_081556 | 539 coding   | noncoding | noncoding | noncoding |
| MSTRG. 75400. 1  | SERINC5      | XLOC_081576 | 232 coding   | noncoding | noncoding | noncoding |
| MSTRG. 75406. 1  | SERINC5      | XLOC_081582 | 295 coding   | noncoding | noncoding | noncoding |
| NR_003665. 1     | CRSP8P       | XLOC_081593 | 1362 coding  | coding    | coding    | coding    |
| MSTRG. 75302. 1  |              | XLOC_081594 | 288 coding   | noncoding | noncoding | noncoding |
| MSTRG. 75415. 12 | ZFYVE16      | XLOC_081595 | 11944 coding | coding    | noncoding | noncoding |
| MSTRG. 75787. 1  |              | XLOC_081599 | 241 coding   | noncoding | noncoding | noncoding |
| MSTRG. 75788. 1  |              | XLOC_081600 | 400 coding   | noncoding | noncoding | noncoding |
| MSTRG. 75794. 8  | MSH3         | XLOC_081604 | 895 coding   | coding    | noncoding | noncoding |
| MSTRG. 75794. 9  | MSH3         | XLOC_081604 | 1956 coding  | coding    | noncoding | noncoding |
| NM_012446. 4     | SSBP2        | XLOC_081622 | 8994 coding  | coding    | coding    | coding    |
| NM_001345886. 1  | SSBP2        | XLOC_081622 | 8919 coding  | coding    | coding    | coding    |
| MSTRG. 75478. 1  | SSBP2        | XLOC_081653 | 273 coding   | noncoding | noncoding | noncoding |
| NM_001025. 5     | RPS23        | XLOC_081686 | 3252 coding  | coding    | coding    | noncoding |
| MSTRG. 75513. 1  |              | XLOC_081694 | 219 coding   | noncoding | noncoding | noncoding |
| MSTRG. 75522. 1  |              | XLOC_081700 | 282 coding   | noncoding | noncoding | noncoding |
| MSTRG. 75614. 1  |              | XLOC_081741 | 263 coding   | noncoding | noncoding | noncoding |
| MSTRG. 75642. 1  |              | XLOC_081744 | 464 coding   | noncoding | noncoding | noncoding |
| MSTRG. 75658. 1  |              | XLOC_081748 | 275 coding   | noncoding | noncoding | noncoding |
| MSTRG. 75659. 1  |              | XLOC_081749 | 279 coding   | coding    | noncoding | noncoding |
| MSTRG. 75667. 1  |              | XLOC_081752 | 309 coding   | noncoding | noncoding | noncoding |
| MSTRG. 75679. 1  |              | XLOC_081760 | 239 coding   | noncoding | noncoding | noncoding |
| MSTRG. 75684. 1  |              | XLOC_081765 | 206 coding   | noncoding | noncoding | noncoding |
| MSTRG. 75687. 1  |              | XLOC_081767 | 255 coding   | noncoding | noncoding | noncoding |
| MSTRG. 75697. 1  |              | XLOC_081774 | 287 coding   | noncoding | noncoding | noncoding |
| MSTRG. 75699. 1  |              | XLOC_081779 | 281 coding   | noncoding | noncoding | noncoding |
| MSTRG. 75737. 1  | LOC645261    | XLOC_081804 | 259 coding   | noncoding | noncoding | noncoding |
| MSTRG. 75773. 1  |              | XLOC_081823 | 309 coding   | noncoding | noncoding | noncoding |
| MSTRG. 75899. 1  | TMEM161B-AS1 | XLOC_081835 | 314 coding   | coding    | noncoding | noncoding |
| NM_002397. 5     | MEF2C        | XLOC_081850 | 7281 coding  | coding    | coding    | coding    |
| NM_001364329. 2  | MEF2C        | XLOC_081850 | 7470 coding  | coding    | coding    | coding    |
| MSTRG. 76082. 1  | MEF2C-AS1    | XLOC_081912 | 293 coding   | noncoding | noncoding | noncoding |
| MSTRG. 75935. 1  | LINC02161    | XLOC_081952 | 309 coding   | noncoding | noncoding | noncoding |
| MSTRG. 75925. 1  |              | XLOC_081959 | 370 coding   | noncoding | noncoding | noncoding |
| MSTRG. 75962. 1  | LINC01339    | XLOC_081968 | 248 coding   | noncoding | noncoding | noncoding |
| MSTRG. 76243. 1  | ADGRV1       | XLOC_081988 | 281 coding   | coding    | noncoding | noncoding |

|                  |              |             |              |           |           |           |
|------------------|--------------|-------------|--------------|-----------|-----------|-----------|
| MSTRG. 76245. 1  | ADGRV1       | XLOC_081990 | 275 coding   | noncoding | noncoding | noncoding |
| MSTRG. 76249. 1  | ADGRV1       | XLOC_081994 | 244 coding   | noncoding | noncoding | noncoding |
| MSTRG. 76193. 1  | NR2F1-AS1    | XLOC_082107 | 302 coding   | coding    | noncoding | noncoding |
| MSTRG. 77961. 1  | FAM172A      | XLOC_082112 | 297 coding   | noncoding | noncoding | noncoding |
| MSTRG. 78038. 1  | LOC105379087 | XLOC_082185 | 270 coding   | noncoding | noncoding | noncoding |
| MSTRG. 78068. 1  | KIAA0825     | XLOC_082209 | 319 coding   | noncoding | noncoding | noncoding |
| MSTRG. 76884. 1  | LOC101929710 | XLOC_082341 | 311 coding   | noncoding | noncoding | noncoding |
| MSTRG. 76888. 37 | ERAP1        | XLOC_082343 | 13613 coding | coding    | coding    | coding    |
| MSTRG. 76445. 1  |              | XLOC_082349 | 671 coding   | noncoding | noncoding | noncoding |
| MSTRG. 76415. 1  |              | XLOC_082441 | 230 coding   | coding    | noncoding | noncoding |
| MSTRG. 76427. 1  |              | XLOC_082448 | 238 coding   | noncoding | noncoding | noncoding |
| MSTRG. 76428. 1  |              | XLOC_082449 | 210 coding   | noncoding | noncoding | noncoding |
| MSTRG. 76430. 1  |              | XLOC_082450 | 254 coding   | noncoding | noncoding | noncoding |
| MSTRG. 76546. 1  |              | XLOC_082476 | 304 coding   | noncoding | coding    | noncoding |
| MSTRG. 76557. 1  |              | XLOC_082483 | 425 coding   | noncoding | noncoding | noncoding |
| MSTRG. 76760. 1  |              | XLOC_082544 | 394 coding   | noncoding | noncoding | noncoding |
| MSTRG. 77008. 5  | PAM          | XLOC_082558 | 449 coding   | coding    | noncoding | noncoding |
| MSTRG. 76927. 1  |              | XLOC_082574 | 221 coding   | noncoding | noncoding | noncoding |
| MSTRG. 77000. 1  |              | XLOC_082601 | 236 coding   | noncoding | noncoding | noncoding |
| MSTRG. 77001. 1  |              | XLOC_082602 | 288 coding   | noncoding | noncoding | noncoding |
| MSTRG. 77083. 1  |              | XLOC_082611 | 284 coding   | noncoding | noncoding | noncoding |
| MSTRG. 77087. 1  |              | XLOC_082615 | 262 coding   | noncoding | noncoding | noncoding |
| MSTRG. 77100. 1  |              | XLOC_082621 | 389 coding   | noncoding | noncoding | noncoding |
| MSTRG. 77128. 1  | LINC01950    | XLOC_082634 | 268 coding   | noncoding | noncoding | noncoding |
| MSTRG. 77210. 1  |              | XLOC_082655 | 382 coding   | noncoding | noncoding | noncoding |
| MSTRG. 77289. 12 | MAN2A1       | XLOC_082752 | 2810 coding  | coding    | coding    | noncoding |
| MSTRG. 77358. 1  |              | XLOC_082783 | 211 coding   | noncoding | noncoding | noncoding |
| MSTRG. 77364. 1  |              | XLOC_082787 | 255 coding   | noncoding | noncoding | noncoding |
| MSTRG. 77484. 1  | TMEM232      | XLOC_082803 | 274 coding   | noncoding | noncoding | noncoding |
| MSTRG. 77488. 1  | TMEM232      | XLOC_082805 | 248 coding   | noncoding | noncoding | noncoding |
| MSTRG. 77492. 1  | TMEM232      | XLOC_082807 | 244 coding   | coding    | noncoding | noncoding |
| MSTRG. 77493. 1  | TMEM232      | XLOC_082808 | 308 coding   | coding    | noncoding | noncoding |
| MSTRG. 77467. 1  |              | XLOC_082814 | 200 coding   | noncoding | noncoding | noncoding |
| XM_017009041. 2  | STARD4       | XLOC_082824 | 9115 coding  | coding    | noncoding | noncoding |
| MSTRG. 77593. 2  | CAMK4        | XLOC_082825 | 2365 coding  | noncoding | noncoding | noncoding |
| MSTRG. 77650. 1  | NREP         | XLOC_082839 | 283 coding   | noncoding | noncoding | noncoding |
| MSTRG. 77658. 1  | NREP-AS1     | XLOC_082843 | 261 coding   | noncoding | noncoding | noncoding |
| MSTRG. 77525. 1  |              | XLOC_082846 | 267 coding   | noncoding | noncoding | noncoding |
| NM_001347887. 2  | EPB41L4A     | XLOC_082849 | 3698 coding  | coding    | coding    | coding    |
| NM_032028. 4     | TSSK1B       | XLOC_082898 | 2437 coding  | coding    | coding    | coding    |
| MSTRG. 77691. 1  | LOC107986441 | XLOC_082908 | 262 coding   | noncoding | noncoding | noncoding |
| MSTRG. 77728. 1  | KCNN2        | XLOC_082926 | 228 coding   | noncoding | noncoding | noncoding |
| MSTRG. 77749. 1  | LOC101927078 | XLOC_082936 | 285 coding   | noncoding | noncoding | noncoding |

|                 |              |             |             |           |           |           |
|-----------------|--------------|-------------|-------------|-----------|-----------|-----------|
| MSTRG. 77706. 1 |              | XLOC_082938 | 225 coding  | coding    | noncoding | noncoding |
| MSTRG. 77708. 1 |              | XLOC_082939 | 235 coding  | noncoding | noncoding | noncoding |
| MSTRG. 77767. 1 | TRIM36       | XLOC_082945 | 286 coding  | noncoding | noncoding | noncoding |
| MSTRG. 77860. 1 |              | XLOC_082960 | 278 coding  | noncoding | noncoding | noncoding |
| MSTRG. 78113. 1 |              | XLOC_083084 | 283 coding  | noncoding | noncoding | noncoding |
| MSTRG. 78130. 1 |              | XLOC_083091 | 251 coding  | noncoding | noncoding | noncoding |
| MSTRG. 78167. 1 | LINC02147    | XLOC_083098 | 267 coding  | noncoding | noncoding | noncoding |
| MSTRG. 78174. 1 | LINC02147    | XLOC_083102 | 323 coding  | noncoding | noncoding | noncoding |
| MSTRG. 78140. 1 |              | XLOC_083121 | 302 coding  | noncoding | noncoding | noncoding |
| MSTRG. 78237. 1 |              | XLOC_083143 | 385 coding  | noncoding | noncoding | noncoding |
| MSTRG. 78329. 1 |              | XLOC_083148 | 277 coding  | noncoding | noncoding | noncoding |
| MSTRG. 78335. 1 |              | XLOC_083152 | 234 coding  | noncoding | noncoding | noncoding |
| MSTRG. 78338. 1 |              | XLOC_083153 | 241 coding  | noncoding | noncoding | noncoding |
| MSTRG. 78343. 1 | LOC105379144 | XLOC_083154 | 287 coding  | noncoding | noncoding | noncoding |
| MSTRG. 78408. 1 | PRR16        | XLOC_083181 | 468 coding  | noncoding | noncoding | noncoding |
| MSTRG. 78431. 1 |              | XLOC_083199 | 234 coding  | noncoding | noncoding | noncoding |
| MSTRG. 78650. 1 | SNCAIP       | XLOC_083236 | 245 coding  | noncoding | noncoding | noncoding |
| MSTRG. 78651. 1 | SNCAIP       | XLOC_083237 | 214 coding  | noncoding | noncoding | noncoding |
| MSTRG. 78653. 1 | SNCAIP       | XLOC_083239 | 254 coding  | noncoding | noncoding | noncoding |
| MSTRG. 78639. 1 | LINC02201    | XLOC_083247 | 310 coding  | noncoding | noncoding | noncoding |
| MSTRG. 78660. 1 |              | XLOC_083269 | 459 coding  | noncoding | noncoding | noncoding |
| MSTRG. 78713. 1 |              | XLOC_083273 | 268 coding  | noncoding | noncoding | noncoding |
| XM_011543186. 2 | CEP120       | XLOC_083275 | 4319 coding | coding    | coding    | coding    |
| MSTRG. 78673. 1 |              | XLOC_083300 | 317 coding  | noncoding | noncoding | noncoding |
| MSTRG. 78745. 1 |              | XLOC_083310 | 246 coding  | noncoding | noncoding | noncoding |
| MSTRG. 78753. 1 |              | XLOC_083313 | 280 coding  | noncoding | noncoding | noncoding |
| MSTRG. 78785. 1 | LINC01170    | XLOC_083330 | 248 coding  | noncoding | noncoding | noncoding |
| MSTRG. 78789. 1 | LINC01170    | XLOC_083332 | 264 coding  | noncoding | noncoding | noncoding |
| MSTRG. 78771. 1 |              | XLOC_083337 | 289 coding  | coding    | noncoding | noncoding |
| MSTRG. 78775. 1 |              | XLOC_083340 | 219 coding  | noncoding | noncoding | noncoding |
| XM_005272039. 3 | ZNF608       | XLOC_083341 | 6177 coding | noncoding | coding    | coding    |
| MSTRG. 78838. 1 |              | XLOC_083362 | 239 coding  | noncoding | noncoding | noncoding |
| MSTRG. 78881. 1 | LOC101927421 | XLOC_083366 | 258 coding  | noncoding | noncoding | noncoding |
| MSTRG. 78945. 1 | ALDH7A1      | XLOC_083398 | 300 coding  | noncoding | noncoding | noncoding |
| MSTRG. 78935. 1 |              | XLOC_083401 | 359 coding  | noncoding | noncoding | noncoding |
| MSTRG. 78936. 1 |              | XLOC_083403 | 281 coding  | noncoding | noncoding | noncoding |
| MSTRG. 78973. 1 |              | XLOC_083444 | 203 coding  | noncoding | noncoding | noncoding |
| MSTRG. 79140. 1 | CCDC192      | XLOC_083466 | 259 coding  | noncoding | noncoding | noncoding |
| NR_152814. 1    | LINC01184    | XLOC_083469 | 1806 coding | noncoding | coding    | noncoding |
| MSTRG. 79152. 1 | LINC01184    | XLOC_083470 | 256 coding  | noncoding | noncoding | noncoding |
| MSTRG. 79073. 1 | LOC105379168 | XLOC_083505 | 284 coding  | noncoding | noncoding | noncoding |
| MSTRG. 79125. 1 |              | XLOC_083563 | 288 coding  | noncoding | noncoding | noncoding |
| MSTRG. 79128. 1 |              | XLOC_083571 | 255 coding  | noncoding | noncoding | noncoding |

|                 |              |             |             |           |           |           |
|-----------------|--------------|-------------|-------------|-----------|-----------|-----------|
| MSTRG. 79301. 1 |              | XLOC_083572 | 304 coding  | noncoding | noncoding | noncoding |
| MSTRG. 79282. 1 |              | XLOC_083596 | 265 coding  | noncoding | noncoding | noncoding |
| MSTRG. 79286. 1 |              | XLOC_083598 | 266 coding  | coding    | noncoding | noncoding |
| MSTRG. 79290. 1 |              | XLOC_083599 | 288 coding  | noncoding | noncoding | noncoding |
| MSTRG. 79296. 1 |              | XLOC_083603 | 265 coding  | noncoding | noncoding | noncoding |
| MSTRG. 79371. 1 |              | XLOC_083612 | 281 coding  | noncoding | noncoding | noncoding |
| MSTRG. 79407. 1 | RAPGEF6      | XLOC_083638 | 324 coding  | noncoding | noncoding | noncoding |
| MSTRG. 79439. 1 | FNIP1        | XLOC_083666 | 306 coding  | noncoding | noncoding | noncoding |
| MSTRG. 79331. 1 | MEIKIN       | XLOC_083672 | 323 coding  | noncoding | noncoding | noncoding |
| MSTRG. 79340. 1 | MEIKIN       | XLOC_083675 | 271 coding  | noncoding | noncoding | noncoding |
| NM_001205250. 1 | ACSL6        | XLOC_083679 | 6536 coding | coding    | coding    | coding    |
| MSTRG. 79352. 1 |              | XLOC_083681 | 254 coding  | noncoding | noncoding | noncoding |
| MSTRG. 79543. 1 |              | XLOC_083696 | 296 coding  | noncoding | noncoding | noncoding |
| XM_011543308. 3 | GDF9         | XLOC_083728 | 3634 coding | coding    | coding    | coding    |
| MSTRG. 79488. 1 |              | XLOC_083743 | 309 coding  | noncoding | noncoding | noncoding |
| MSTRG. 79489. 1 |              | XLOC_083744 | 282 coding  | noncoding | noncoding | noncoding |
| MSTRG. 79594. 1 | FSTL4        | XLOC_083766 | 270 coding  | noncoding | noncoding | noncoding |
| MSTRG. 79627. 1 | VDAC1        | XLOC_083779 | 316 coding  | noncoding | noncoding | noncoding |
| MSTRG. 79632. 1 | VDAC1        | XLOC_083781 | 247 coding  | noncoding | noncoding | noncoding |
| MSTRG. 79614. 1 | LOC105379185 | XLOC_083785 | 524 coding  | noncoding | noncoding | noncoding |
| NM_006930. 3    | SKP1         | XLOC_083788 | 2699 coding | coding    | coding    | coding    |
| MSTRG. 79640. 1 | TCF7         | XLOC_083789 | 9018 coding | noncoding | coding    | noncoding |
| MSTRG. 79644. 1 | TCF7         | XLOC_083792 | 2347 coding | noncoding | coding    | coding    |
| NR_149151. 1    | PPP2CA       | XLOC_083793 | 2705 coding | coding    | coding    | coding    |
| MSTRG. 79683. 1 |              | XLOC_083812 | 246 coding  | noncoding | noncoding | noncoding |
| MSTRG. 79783. 1 | C5orf66      | XLOC_083850 | 211 coding  | noncoding | noncoding | noncoding |
| MSTRG. 79814. 1 | SMAD5-AS1    | XLOC_083889 | 7495 coding | coding    | coding    | noncoding |
| NM_020389. 2    | TRPC7        | XLOC_083895 | 2935 coding | coding    | coding    | coding    |
| MSTRG. 79828. 1 |              | XLOC_083899 | 235 coding  | coding    | noncoding | noncoding |
| MSTRG. 79853. 1 |              | XLOC_083911 | 280 coding  | coding    | noncoding | noncoding |
| MSTRG. 79904. 1 | SPOCK1       | XLOC_083928 | 413 coding  | noncoding | noncoding | noncoding |
| MSTRG. 79924. 1 |              | XLOC_083939 | 240 coding  | noncoding | noncoding | noncoding |
| MSTRG. 79968. 1 |              | XLOC_083942 | 461 coding  | noncoding | noncoding | noncoding |
| MSTRG. 80003. 1 | MYOT         | XLOC_083950 | 301 coding  | noncoding | noncoding | noncoding |
| MSTRG. 80007. 1 |              | XLOC_083962 | 306 coding  | noncoding | noncoding | noncoding |
| XM_024446227. 1 | NME5         | XLOC_083963 | 2201 coding | coding    | noncoding | coding    |
| MSTRG. 80011. 1 | NME5         | XLOC_083964 | 385 coding  | noncoding | noncoding | noncoding |
| MSTRG. 80032. 1 | CDC23        | XLOC_083969 | 294 coding  | noncoding | noncoding | noncoding |
| MSTRG. 80013. 1 |              | XLOC_083972 | 260 coding  | noncoding | noncoding | noncoding |
| MSTRG. 80036. 1 | REEP2        | XLOC_083976 | 219 coding  | noncoding | noncoding | noncoding |
| MSTRG. 80043. 1 |              | XLOC_083985 | 239 coding  | noncoding | noncoding | noncoding |
| MSTRG. 80076. 1 | HSPA9        | XLOC_083988 | 291 coding  | noncoding | noncoding | noncoding |
| MSTRG. 80128. 3 | CTNNA1       | XLOC_083995 | 1562 coding | coding    | noncoding | noncoding |

|                  |                 |             |              |           |           |           |
|------------------|-----------------|-------------|--------------|-----------|-----------|-----------|
| MSTRG. 80081. 1  |                 | XLOC_084017 | 281 coding   | noncoding | noncoding | noncoding |
| MSTRG. 80114. 1  |                 | XLOC_084034 | 267 coding   | noncoding | noncoding | noncoding |
| MSTRG. 80176. 5  | UBE2D2          | XLOC_084035 | 527 coding   | coding    | noncoding | noncoding |
| MSTRG. 80170. 1  | PSD2            | XLOC_084046 | 266 coding   | noncoding | noncoding | noncoding |
| MSTRG. 80206. 1  | NRG2            | XLOC_084056 | 508 coding   | noncoding | noncoding | noncoding |
| MSTRG. 80213. 1  | NRG2            | XLOC_084058 | 610 coding   | noncoding | noncoding | noncoding |
| MSTRG. 80233. 1  |                 | XLOC_084078 | 403 coding   | noncoding | noncoding | noncoding |
| MSTRG. 80278. 9  | ANKHD1-EIF4EBP3 | XLOC_084080 | 8227 coding  | coding    | coding    | noncoding |
| MSTRG. 80278. 8  | ANKHD1-EIF4EBP3 | XLOC_084080 | 8284 coding  | coding    | coding    | noncoding |
| MSTRG. 80314. 1  | TMCO6           | XLOC_084090 | 299 coding   | noncoding | noncoding | noncoding |
| MSTRG. 80320. 21 | ZMAT2           | XLOC_084094 | 1528 coding  | coding    | noncoding | noncoding |
| XM_024446283. 1  | LOC112267934    | XLOC_084095 | 10200 coding | coding    | coding    | coding    |
| MSTRG. 80253. 1  |                 | XLOC_084099 | 219 coding   | noncoding | noncoding | noncoding |
| MSTRG. 80418. 1  | PCDHGB8P        | XLOC_084122 | 231 coding   | noncoding | noncoding | noncoding |
| MSTRG. 80437. 1  | DIAPH1          | XLOC_084137 | 303 coding   | noncoding | noncoding | noncoding |
| XM_017009910. 2  | SPRY4           | XLOC_084182 | 5977 coding  | coding    | coding    | coding    |
| MSTRG. 80396. 1  | FGF1            | XLOC_084191 | 265 coding   | noncoding | noncoding | noncoding |
| MSTRG. 80990. 23 | ARHGAP26        | XLOC_084195 | 3096 coding  | coding    | noncoding | noncoding |
| MSTRG. 80990. 35 | ARHGAP26        | XLOC_084195 | 9710 coding  | noncoding | coding    | noncoding |
| MSTRG. 81018. 2  | ARHGAP26        | XLOC_084196 | 10715 coding | noncoding | coding    | noncoding |
| NM_001364184. 2  | NR3C1           | XLOC_084212 | 6412 coding  | coding    | coding    | coding    |
| MSTRG. 80491. 1  |                 | XLOC_084237 | 255 coding   | noncoding | noncoding | noncoding |
| MSTRG. 80496. 1  |                 | XLOC_084241 | 304 coding   | noncoding | noncoding | noncoding |
| MSTRG. 80511. 1  |                 | XLOC_084259 | 288 coding   | coding    | noncoding | noncoding |
| MSTRG. 80556. 1  |                 | XLOC_084267 | 230 coding   | noncoding | noncoding | noncoding |
| XM_017009128. 1  | PRELID2         | XLOC_084275 | 2826 coding  | coding    | coding    | coding    |
| MSTRG. 80574. 1  | GRXCR2          | XLOC_084282 | 242 coding   | noncoding | noncoding | noncoding |
| MSTRG. 80666. 1  |                 | XLOC_084299 | 220 coding   | noncoding | noncoding | noncoding |
| MSTRG. 80692. 5  | TCERG1          | XLOC_084303 | 1180 coding  | coding    | noncoding | noncoding |
| MSTRG. 80686. 1  |                 | XLOC_084340 | 324 coding   | noncoding | noncoding | noncoding |
| MSTRG. 80709. 1  | STK32A-AS1      | XLOC_084348 | 213 coding   | noncoding | noncoding | noncoding |
| NM_001197294. 2  | DPYSL3          | XLOC_084354 | 5492 coding  | coding    | coding    | coding    |
| MSTRG. 80797. 1  | JAKMIP2-AS1     | XLOC_084356 | 346 coding   | noncoding | noncoding | noncoding |
| NM_001354966. 1  | SPINK1          | XLOC_084372 | 643 coding   | coding    | noncoding | noncoding |
| MSTRG. 80735. 1  |                 | XLOC_084378 | 245 coding   | noncoding | noncoding | noncoding |
| MSTRG. 80756. 1  |                 | XLOC_084385 | 227 coding   | noncoding | noncoding | noncoding |
| NM_024577. 3     | SH3TC2          | XLOC_084410 | 26580 coding | coding    | coding    | coding    |
| MSTRG. 80926. 1  | AFAP1L1         | XLOC_084423 | 265 coding   | noncoding | noncoding | noncoding |
| MSTRG. 80955. 1  |                 | XLOC_084429 | 354 coding   | noncoding | noncoding | noncoding |
| MSTRG. 80982. 1  | ARHGEF37        | XLOC_084440 | 292 coding   | noncoding | noncoding | noncoding |
| MSTRG. 80989. 1  |                 | XLOC_084478 | 253 coding   | noncoding | noncoding | noncoding |
| NM_001355017. 2  | PDGFRB          | XLOC_084484 | 5734 coding  | coding    | coding    | coding    |
| MSTRG. 81216. 1  |                 | XLOC_084490 | 234 coding   | noncoding | noncoding | noncoding |

|                 |              |             |             |           |           |           |
|-----------------|--------------|-------------|-------------|-----------|-----------|-----------|
| MSTRG. 81251. 1 | TCOF1        | XLOC_084506 | 451 coding  | noncoding | noncoding | noncoding |
| MSTRG. 81236. 4 | RPS14        | XLOC_084510 | 961 coding  | coding    | coding    | noncoding |
| MSTRG. 81263. 3 | NDST1-AS1    | XLOC_084512 | 3969 coding | coding    | coding    | coding    |
| MSTRG. 81352. 1 |              | XLOC_084560 | 841 coding  | noncoding | noncoding | noncoding |
| MSTRG. 81354. 1 | GM2A         | XLOC_084562 | 3720 coding | coding    | noncoding | noncoding |
| MSTRG. 81385. 1 | LOC105378234 | XLOC_084569 | 284 coding  | noncoding | noncoding | noncoding |
| MSTRG. 81359. 1 |              | XLOC_084593 | 323 coding  | noncoding | noncoding | noncoding |
| MSTRG. 81438. 1 |              | XLOC_084640 | 220 coding  | noncoding | noncoding | noncoding |
| MSTRG. 81487. 1 | LINC01470    | XLOC_084644 | 301 coding  | noncoding | noncoding | noncoding |
| MSTRG. 81473. 1 |              | XLOC_084645 | 293 coding  | noncoding | noncoding | noncoding |
| MSTRG. 81476. 1 |              | XLOC_084647 | 305 coding  | noncoding | noncoding | noncoding |
| MSTRG. 81540. 1 |              | XLOC_084673 | 547 coding  | noncoding | noncoding | noncoding |
| MSTRG. 81552. 1 |              | XLOC_084684 | 309 coding  | coding    | noncoding | noncoding |
| MSTRG. 81559. 1 |              | XLOC_084689 | 285 coding  | noncoding | noncoding | noncoding |
| MSTRG. 81582. 1 | LARP1        | XLOC_084692 | 265 coding  | noncoding | noncoding | noncoding |
| MSTRG. 81589. 1 | LARP1        | XLOC_084696 | 216 coding  | noncoding | noncoding | noncoding |
| MSTRG. 81563. 1 |              | XLOC_084705 | 312 coding  | coding    | noncoding | noncoding |
| MSTRG. 81573. 1 | GEMIN5       | XLOC_084707 | 257 coding  | noncoding | noncoding | noncoding |
| MSTRG. 81624. 1 |              | XLOC_084724 | 440 coding  | noncoding | noncoding | noncoding |
| MSTRG. 81627. 1 |              | XLOC_084726 | 222 coding  | noncoding | noncoding | noncoding |
| MSTRG. 82316. 1 | SGCD         | XLOC_084778 | 287 coding  | noncoding | noncoding | noncoding |
| MSTRG. 81679. 1 |              | XLOC_084800 | 249 coding  | noncoding | noncoding | noncoding |
| MSTRG. 81687. 1 | HAVCR1       | XLOC_084802 | 240 coding  | noncoding | noncoding | noncoding |
| MSTRG. 81688. 1 | HAVCR1       | XLOC_084803 | 386 coding  | noncoding | noncoding | noncoding |
| MSTRG. 81671. 1 |              | XLOC_084807 | 300 coding  | noncoding | noncoding | noncoding |
| MSTRG. 81705. 1 |              | XLOC_084834 | 977 coding  | noncoding | noncoding | noncoding |
| XM_017010087. 2 | CLINT1       | XLOC_084842 | 3438 coding | coding    | coding    | coding    |
| MSTRG. 81734. 1 |              | XLOC_084851 | 436 coding  | noncoding | noncoding | noncoding |
| MSTRG. 81735. 1 |              | XLOC_084852 | 286 coding  | noncoding | noncoding | noncoding |
| MSTRG. 81736. 1 |              | XLOC_084853 | 265 coding  | coding    | coding    | noncoding |
| MSTRG. 81773. 1 |              | XLOC_084863 | 276 coding  | noncoding | noncoding | noncoding |
| MSTRG. 81822. 1 |              | XLOC_084887 | 295 coding  | noncoding | noncoding | noncoding |
| MSTRG. 81924. 2 | TTC1         | XLOC_084947 | 1216 coding | noncoding | noncoding | noncoding |
| XM_011534425. 2 | C1QTNF2      | XLOC_084963 | 2739 coding | coding    | coding    | coding    |
| MSTRG. 82003. 1 | SLU7         | XLOC_084967 | 299 coding  | noncoding | noncoding | noncoding |
| MSTRG. 82067. 1 | ATP10B       | XLOC_084985 | 273 coding  | coding    | noncoding | noncoding |
| MSTRG. 82068. 1 | ATP10B       | XLOC_084986 | 272 coding  | noncoding | noncoding | noncoding |
| MSTRG. 82013. 1 |              | XLOC_084993 | 295 coding  | noncoding | noncoding | noncoding |
| MSTRG. 82034. 1 | GABRB2       | XLOC_085000 | 247 coding  | noncoding | noncoding | noncoding |
| MSTRG. 82041. 1 |              | XLOC_085011 | 396 coding  | coding    | noncoding | noncoding |
| MSTRG. 82082. 1 |              | XLOC_085013 | 232 coding  | noncoding | noncoding | noncoding |
| MSTRG. 82094. 1 |              | XLOC_085023 | 299 coding  | noncoding | noncoding | noncoding |
| MSTRG. 82098. 1 | LOC105377697 | XLOC_085025 | 286 coding  | noncoding | coding    | noncoding |

|                 |              |             |              |           |           |           |
|-----------------|--------------|-------------|--------------|-----------|-----------|-----------|
| MSTRG. 82118. 1 |              | XLOC_085035 | 293 coding   | noncoding | noncoding | noncoding |
| MSTRG. 82146. 1 | LOC105377700 | XLOC_085046 | 322 coding   | noncoding | noncoding | noncoding |
| MSTRG. 82164. 1 |              | XLOC_085059 | 532 coding   | noncoding | noncoding | noncoding |
| MSTRG. 82189. 1 |              | XLOC_085071 | 305 coding   | noncoding | noncoding | noncoding |
| MSTRG. 82220. 1 |              | XLOC_085088 | 287 coding   | noncoding | noncoding | noncoding |
| MSTRG. 82234. 1 |              | XLOC_085091 | 293 coding   | noncoding | noncoding | noncoding |
| MSTRG. 82239. 1 |              | XLOC_085094 | 317 coding   | noncoding | noncoding | noncoding |
| MSTRG. 82348. 1 |              | XLOC_085097 | 224 coding   | noncoding | noncoding | noncoding |
| MSTRG. 82377. 1 |              | XLOC_085117 | 215 coding   | noncoding | noncoding | noncoding |
| MSTRG. 82379. 1 |              | XLOC_085119 | 242 coding   | noncoding | noncoding | noncoding |
| MSTRG. 82411. 1 | TENM2        | XLOC_085131 | 368 coding   | coding    | noncoding | noncoding |
| MSTRG. 82420. 1 | TENM2        | XLOC_085135 | 325 coding   | noncoding | noncoding | noncoding |
| MSTRG. 82387. 1 | WWC1         | XLOC_085153 | 461 coding   | noncoding | noncoding | noncoding |
| MSTRG. 82390. 1 | WWC1         | XLOC_085154 | 239 coding   | noncoding | noncoding | noncoding |
| MSTRG. 82509. 1 | LOC105377715 | XLOC_085180 | 250 coding   | noncoding | noncoding | noncoding |
| MSTRG. 82513. 1 | LOC105377714 | XLOC_085183 | 238 coding   | noncoding | noncoding | noncoding |
| MSTRG. 82766. 4 | INSYN2B      | XLOC_085186 | 19449 coding | coding    | coding    | coding    |
| MSTRG. 82766. 8 | DOCK2        | XLOC_085186 | 6775 coding  | coding    | coding    | noncoding |
| MSTRG. 82519. 1 |              | XLOC_085189 | 280 coding   | noncoding | noncoding | noncoding |
| MSTRG. 82580. 1 | RANBP17      | XLOC_085241 | 292 coding   | noncoding | noncoding | noncoding |
| MSTRG. 82585. 1 | RANBP17      | XLOC_085244 | 228 coding   | noncoding | noncoding | noncoding |
| MSTRG. 82569. 1 |              | XLOC_085247 | 227 coding   | noncoding | noncoding | noncoding |
| MSTRG. 82685. 1 | LOC100288254 | XLOC_085305 | 290 coding   | noncoding | noncoding | noncoding |
| MSTRG. 82903. 1 | CREBRF       | XLOC_085336 | 338 coding   | noncoding | noncoding | noncoding |
| MSTRG. 82906. 1 |              | XLOC_085338 | 258 coding   | noncoding | noncoding | noncoding |
| MSTRG. 82911. 1 |              | XLOC_085342 | 313 coding   | noncoding | noncoding | noncoding |
| MSTRG. 82958. 1 |              | XLOC_085379 | 306 coding   | noncoding | noncoding | noncoding |
| MSTRG. 82998. 1 | NSG2         | XLOC_085390 | 232 coding   | noncoding | noncoding | noncoding |
| MSTRG. 83001. 1 |              | XLOC_085396 | 244 coding   | noncoding | noncoding | noncoding |
| MSTRG. 83024. 1 | LINC01411    | XLOC_085397 | 491 coding   | noncoding | noncoding | noncoding |
| MSTRG. 83031. 1 | LOC105377740 | XLOC_085401 | 282 coding   | noncoding | noncoding | noncoding |
| MSTRG. 83036. 1 |              | XLOC_085403 | 261 coding   | noncoding | noncoding | noncoding |
| MSTRG. 83065. 1 |              | XLOC_085418 | 580 coding   | noncoding | noncoding | noncoding |
| XM_017009652. 1 | KIAA1191     | XLOC_085461 | 2261 coding  | coding    | coding    | coding    |
| MSTRG. 83174. 6 | NOP16        | XLOC_085469 | 1782 coding  | coding    | coding    | coding    |
| MSTRG. 83166. 1 |              | XLOC_085473 | 378 coding   | noncoding | noncoding | noncoding |
| MSTRG. 83205. 1 |              | XLOC_085487 | 204 coding   | noncoding | noncoding | noncoding |
| XM_017009578. 1 | UIMC1        | XLOC_085494 | 1818 coding  | coding    | coding    | coding    |
| MSTRG. 83249. 1 | UIMC1        | XLOC_085495 | 288 coding   | noncoding | noncoding | noncoding |
| MSTRG. 83288. 2 | MXD3         | XLOC_085512 | 1160 coding  | coding    | coding    | noncoding |
| NR_038915. 1    | PRR7-AS1     | XLOC_085523 | 1600 coding  | noncoding | coding    | noncoding |
| MSTRG. 83294. 1 | LOC105377750 | XLOC_085539 | 347 coding   | noncoding | noncoding | noncoding |
| MSTRG. 83298. 1 |              | XLOC_085543 | 242 coding   | noncoding | noncoding | noncoding |

|                 |              |             |             |           |           |           |
|-----------------|--------------|-------------|-------------|-----------|-----------|-----------|
| NM_006261. 4    | PROP1        | XLOC_085567 | 1464 coding | coding    | coding    | coding    |
| MSTRG. 83345. 1 |              | XLOC_085570 | 236 coding  | noncoding | noncoding | noncoding |
| XM_017010139. 1 | LOC102724657 | XLOC_085592 | 1789 coding | noncoding | coding    | coding    |
| NM_005649. 3    | ZNF354A      | XLOC_085593 | 2521 coding | coding    | coding    | coding    |
| MSTRG. 83423. 1 |              | XLOC_085598 | 307 coding  | noncoding | noncoding | noncoding |
| NM_000843. 4    | GRM6         | XLOC_085613 | 6025 coding | coding    | coding    | coding    |
| MSTRG. 83465. 1 |              | XLOC_085618 | 313 coding  | noncoding | noncoding | noncoding |
| MSTRG. 83479. 1 | ADAMTS2      | XLOC_085626 | 246 coding  | noncoding | noncoding | noncoding |
| NM_001364244. 2 | HNRNPH1      | XLOC_085634 | 2210 coding | coding    | coding    | coding    |
| NM_001364253. 1 | HNRNPH1      | XLOC_085634 | 2692 coding | coding    | coding    | coding    |
| MSTRG. 83495. 1 | CANX         | XLOC_085638 | 2641 coding | coding    | noncoding | noncoding |
| MSTRG. 83535. 5 | RNF130       | XLOC_085646 | 622 coding  | coding    | coding    | noncoding |
| MSTRG. 83519. 1 |              | XLOC_085661 | 241 coding  | noncoding | noncoding | noncoding |
| MSTRG. 83529. 1 | RASGEF1C     | XLOC_085668 | 259 coding  | noncoding | noncoding | noncoding |
| MSTRG. 83580. 1 | MAPK9        | XLOC_085672 | 258 coding  | noncoding | noncoding | noncoding |
| MSTRG. 83570. 1 |              | XLOC_085681 | 322 coding  | noncoding | noncoding | noncoding |
| MSTRG. 83573. 1 |              | XLOC_085683 | 277 coding  | noncoding | noncoding | noncoding |
| MSTRG. 83592. 7 | CNOT6        | XLOC_085684 | 2067 coding | coding    | noncoding | noncoding |
| MSTRG. 83586. 1 |              | XLOC_085686 | 325 coding  | noncoding | noncoding | noncoding |
| MSTRG. 83608. 1 | FLT4         | XLOC_085691 | 312 coding  | noncoding | noncoding | noncoding |
| XM_017009719. 2 | ZFP62        | XLOC_085705 | 4022 coding | coding    | coding    | coding    |
| MSTRG. 83621. 1 |              | XLOC_085707 | 233 coding  | noncoding | noncoding | noncoding |
| MSTRG. 83634. 1 |              | XLOC_085715 | 228 coding  | noncoding | noncoding | noncoding |
| NM_032765. 4    | TRIM52       | XLOC_085736 | 3491 coding | coding    | coding    | coding    |
| MSTRG. 83754. 1 |              | XLOC_085772 | 270 coding  | noncoding | noncoding | noncoding |
| MSTRG. 83764. 1 |              | XLOC_085779 | 276 coding  | noncoding | noncoding | noncoding |
| MSTRG. 83777. 1 |              | XLOC_085785 | 286 coding  | noncoding | noncoding | noncoding |
| MSTRG. 83780. 1 |              | XLOC_085790 | 366 coding  | noncoding | noncoding | noncoding |
| MSTRG. 83793. 1 | LOC102723944 | XLOC_085796 | 259 coding  | noncoding | noncoding | noncoding |
| MSTRG. 84461. 1 | GMDS-DT      | XLOC_085834 | 263 coding  | noncoding | noncoding | noncoding |
| NM_130395. 3    | WRNIP1       | XLOC_085848 | 3823 coding | coding    | coding    | coding    |
| MSTRG. 83916. 1 | BPHL         | XLOC_085881 | 241 coding  | noncoding | noncoding | noncoding |
| XM_011514591. 3 | PSMG4        | XLOC_085888 | 1389 coding | noncoding | noncoding | coding    |
| MSTRG. 83929. 1 |              | XLOC_085909 | 274 coding  | noncoding | noncoding | noncoding |
| MSTRG. 83935. 1 | LOC100507336 | XLOC_085911 | 219 coding  | noncoding | noncoding | noncoding |
| MSTRG. 83956. 1 |              | XLOC_085919 | 277 coding  | noncoding | noncoding | noncoding |
| MSTRG. 83957. 1 |              | XLOC_085920 | 290 coding  | noncoding | noncoding | noncoding |
| XM_017011420. 2 | PRPF4B       | XLOC_085944 | 6212 coding | coding    | coding    | coding    |
| MSTRG. 84103. 1 |              | XLOC_086039 | 246 coding  | noncoding | noncoding | noncoding |
| MSTRG. 84107. 1 |              | XLOC_086047 | 252 coding  | noncoding | noncoding | noncoding |
| MSTRG. 84204. 1 |              | XLOC_086113 | 379 coding  | noncoding | noncoding | noncoding |
| MSTRG. 84285. 1 | CAGE1        | XLOC_086136 | 237 coding  | noncoding | noncoding | noncoding |
| MSTRG. 84314. 1 |              | XLOC_086158 | 278 coding  | noncoding | noncoding | noncoding |

|                 |              |             |             |           |           |           |
|-----------------|--------------|-------------|-------------|-----------|-----------|-----------|
| MSTRG. 84530. 1 |              | XLOC_086211 | 319 coding  | noncoding | noncoding | noncoding |
| MSTRG. 84532. 1 |              | XLOC_086212 | 256 coding  | noncoding | noncoding | noncoding |
| MSTRG. 84538. 1 |              | XLOC_086215 | 242 coding  | noncoding | noncoding | noncoding |
| MSTRG. 84605. 1 |              | XLOC_086246 | 245 coding  | noncoding | noncoding | noncoding |
| XM_017010732. 2 | GCNT2        | XLOC_086254 | 1713 coding | coding    | coding    | coding    |
| MSTRG. 84666. 1 | LOC101928191 | XLOC_086269 | 318 coding  | noncoding | noncoding | noncoding |
| MSTRG. 84680. 1 |              | XLOC_086279 | 402 coding  | noncoding | noncoding | noncoding |
| MSTRG. 84723. 1 |              | XLOC_086302 | 254 coding  | noncoding | noncoding | noncoding |
| XM_011514547. 2 | HIVEP1       | XLOC_086321 | 9076 coding | coding    | coding    | coding    |
| MSTRG. 84946. 1 | HIVEP1       | XLOC_086351 | 270 coding  | noncoding | noncoding | noncoding |
| MSTRG. 84770. 1 |              | XLOC_086355 | 369 coding  | noncoding | noncoding | noncoding |
| MSTRG. 84773. 1 |              | XLOC_086359 | 269 coding  | noncoding | noncoding | noncoding |
| MSTRG. 84787. 1 |              | XLOC_086362 | 302 coding  | noncoding | noncoding | noncoding |
| MSTRG. 84788. 1 |              | XLOC_086363 | 204 coding  | noncoding | noncoding | noncoding |
| MSTRG. 84800. 1 |              | XLOC_086386 | 307 coding  | noncoding | noncoding | noncoding |
| MSTRG. 84865. 1 |              | XLOC_086392 | 212 coding  | noncoding | noncoding | noncoding |
| MSTRG. 84980. 1 |              | XLOC_086402 | 293 coding  | noncoding | noncoding | noncoding |
| MSTRG. 85050. 1 |              | XLOC_086416 | 263 coding  | noncoding | noncoding | noncoding |
| MSTRG. 85084. 1 | LOC105374945 | XLOC_086469 | 273 coding  | noncoding | noncoding | noncoding |
| MSTRG. 85058. 1 |              | XLOC_086476 | 656 coding  | noncoding | noncoding | noncoding |
| MSTRG. 85066. 1 |              | XLOC_086478 | 281 coding  | noncoding | noncoding | noncoding |
| MSTRG. 85067. 1 |              | XLOC_086479 | 236 coding  | noncoding | noncoding | noncoding |
| MSTRG. 85092. 1 |              | XLOC_086480 | 290 coding  | noncoding | noncoding | noncoding |
| MSTRG. 85094. 1 |              | XLOC_086481 | 263 coding  | noncoding | noncoding | noncoding |
| MSTRG. 85164. 1 |              | XLOC_086489 | 269 coding  | noncoding | noncoding | noncoding |
| XM_017010789. 1 | MYLIP        | XLOC_086496 | 1627 coding | coding    | coding    | coding    |
| MSTRG. 85200. 1 |              | XLOC_086522 | 251 coding  | noncoding | noncoding | noncoding |
| MSTRG. 85235. 1 |              | XLOC_086534 | 202 coding  | noncoding | noncoding | noncoding |
| MSTRG. 85250. 1 | CAP2         | XLOC_086541 | 291 coding  | noncoding | noncoding | noncoding |
| MSTRG. 85252. 1 | CAP2         | XLOC_086543 | 259 coding  | noncoding | noncoding | noncoding |
| MSTRG. 85267. 1 |              | XLOC_086550 | 356 coding  | noncoding | coding    | noncoding |
| MSTRG. 85276. 1 |              | XLOC_086553 | 254 coding  | noncoding | noncoding | noncoding |
| MSTRG. 85334. 1 | LOC105374955 | XLOC_086595 | 248 coding  | noncoding | noncoding | noncoding |
| MSTRG. 85336. 1 |              | XLOC_086600 | 228 coding  | noncoding | noncoding | noncoding |
| MSTRG. 85390. 1 |              | XLOC_086609 | 252 coding  | noncoding | noncoding | noncoding |
| MSTRG. 85404. 1 |              | XLOC_086614 | 256 coding  | noncoding | noncoding | noncoding |
| MSTRG. 85406. 1 |              | XLOC_086616 | 219 coding  | noncoding | noncoding | noncoding |
| MSTRG. 85410. 1 | LOC105374959 | XLOC_086617 | 261 coding  | noncoding | noncoding | noncoding |
| MSTRG. 85429. 1 |              | XLOC_086633 | 223 coding  | noncoding | noncoding | noncoding |
| MSTRG. 85554. 1 | LOC101928573 | XLOC_086650 | 275 coding  | noncoding | noncoding | noncoding |
| MSTRG. 85562. 1 |              | XLOC_086671 | 229 coding  | noncoding | noncoding | noncoding |
| MSTRG. 85563. 1 |              | XLOC_086672 | 241 coding  | noncoding | noncoding | noncoding |
| MSTRG. 85815. 1 | CDKAL1       | XLOC_086681 | 258 coding  | noncoding | noncoding | noncoding |

|                 |              |             |             |           |           |           |
|-----------------|--------------|-------------|-------------|-----------|-----------|-----------|
| MSTRG. 85821. 1 | CDKAL1       | XLOC_086686 | 271 coding  | noncoding | noncoding | noncoding |
| MSTRG. 85837. 1 | CDKAL1       | XLOC_086700 | 232 coding  | noncoding | noncoding | noncoding |
| MSTRG. 85598. 1 |              | XLOC_086723 | 333 coding  | noncoding | noncoding | noncoding |
| MSTRG. 85601. 1 |              | XLOC_086724 | 279 coding  | noncoding | noncoding | noncoding |
| MSTRG. 85610. 1 |              | XLOC_086729 | 312 coding  | noncoding | noncoding | noncoding |
| MSTRG. 85635. 1 | CASC15       | XLOC_086736 | 252 coding  | noncoding | noncoding | noncoding |
| MSTRG. 85655. 1 | CASC15       | XLOC_086742 | 294 coding  | noncoding | noncoding | noncoding |
| MSTRG. 85673. 1 | LOC105374971 | XLOC_086753 | 204 coding  | noncoding | noncoding | noncoding |
| MSTRG. 85700. 1 | LOC105374974 | XLOC_086767 | 249 coding  | coding    | noncoding | noncoding |
| MSTRG. 85703. 1 | LOC105374974 | XLOC_086769 | 211 coding  | coding    | noncoding | noncoding |
| MSTRG. 85726. 1 |              | XLOC_086786 | 258 coding  | noncoding | noncoding | noncoding |
| MSTRG. 85760. 1 | GPLD1        | XLOC_086799 | 271 coding  | noncoding | noncoding | noncoding |
| MSTRG. 85764. 1 |              | XLOC_086824 | 311 coding  | noncoding | noncoding | noncoding |
| XM_005249159. 2 | GMNN         | XLOC_086825 | 1388 coding | coding    | coding    | coding    |
| MSTRG. 85864. 1 |              | XLOC_086834 | 269 coding  | noncoding | noncoding | noncoding |
| NM_017640. 6    | CARMIL1      | XLOC_086845 | 5485 coding | coding    | coding    | coding    |
| NM_003542. 3    | HIST1H4C     | XLOC_086907 | 390 coding  | coding    | coding    | coding    |
| MSTRG. 86132. 1 |              | XLOC_086937 | 262 coding  | noncoding | noncoding | noncoding |
| MSTRG. 86133. 1 |              | XLOC_086942 | 257 coding  | noncoding | noncoding | noncoding |
| XM_017010211. 1 | BTN3A2       | XLOC_086943 | 3793 coding | coding    | coding    | coding    |
| XM_005248831. 4 | BTN3A2       | XLOC_086943 | 3577 coding | coding    | coding    | coding    |
| XM_017010213. 2 | BTN3A2       | XLOC_086943 | 1428 coding | coding    | coding    | coding    |
| XM_005248833. 2 | BTN3A1       | XLOC_086949 | 3381 coding | coding    | coding    | coding    |
| NM_001145009. 2 | BTN3A1       | XLOC_086949 | 4145 coding | coding    | coding    | coding    |
| MSTRG. 86134. 1 | HCG11        | XLOC_086964 | 295 coding  | noncoding | noncoding | noncoding |
| MSTRG. 86181. 1 | LINC00240    | XLOC_087015 | 237 coding  | noncoding | noncoding | noncoding |
| MSTRG. 86191. 1 | TRS-GCT2-1   | XLOC_087039 | 312 coding  | noncoding | noncoding | noncoding |
| MSTRG. 86195. 1 | TRS-GCT2-1   | XLOC_087040 | 223 coding  | noncoding | noncoding | noncoding |
| MSTRG. 86196. 1 |              | XLOC_087041 | 280 coding  | noncoding | noncoding | noncoding |
| MSTRG. 86247. 1 | ZNF391       | XLOC_087051 | 288 coding  | noncoding | noncoding | noncoding |
| MSTRG. 86258. 1 |              | XLOC_087063 | 300 coding  | noncoding | noncoding | noncoding |
| MSTRG. 86263. 1 |              | XLOC_087068 | 249 coding  | noncoding | noncoding | noncoding |
| MSTRG. 86280. 1 |              | XLOC_087073 | 292 coding  | noncoding | noncoding | noncoding |
| MSTRG. 86281. 1 |              | XLOC_087075 | 255 coding  | noncoding | noncoding | noncoding |
| MSTRG. 86339. 1 |              | XLOC_087098 | 704 coding  | noncoding | noncoding | noncoding |
| MSTRG. 86314. 1 |              | XLOC_087104 | 265 coding  | noncoding | noncoding | noncoding |
| XM_011514944. 2 | PGBD1        | XLOC_087133 | 4502 coding | coding    | coding    | coding    |
| NR_103864. 1    | ZNRD1        | XLOC_087206 | 661 coding  | coding    | noncoding | noncoding |
| NM_001190724. 3 | ATAT1        | XLOC_087226 | 2861 coding | coding    | coding    | coding    |
| MSTRG. 86505. 1 | IER3         | XLOC_087235 | 272 coding  | noncoding | noncoding | noncoding |
| XM_011514914. 2 | LST1         | XLOC_087266 | 758 coding  | coding    | noncoding | noncoding |
| NM_004638. 4    | PRRC2A       | XLOC_087269 | 6903 coding | coding    | coding    | coding    |
| MSTRG. 86636. 2 |              | XLOC_087327 | 2888 coding | noncoding | noncoding | noncoding |

|                  |              |             |              |           |           |           |
|------------------|--------------|-------------|--------------|-----------|-----------|-----------|
| MSTRG. 86647. 2  | TAP2         | XLOC_087334 | 3877 coding  | coding    | noncoding | coding    |
| NM_022551. 3     | RPS18        | XLOC_087363 | 549 coding   | coding    | coding    | coding    |
| MSTRG. 86699. 1  |              | XLOC_087376 | 240 coding   | noncoding | noncoding | noncoding |
| XR_002956337. 1  | LOC105375027 | XLOC_087399 | 10339 coding | noncoding | coding    | noncoding |
| MSTRG. 86731. 1  |              | XLOC_087403 | 244 coding   | noncoding | noncoding | noncoding |
| MSTRG. 86798. 1  | RPS10-NUDT3  | XLOC_087413 | 362 coding   | noncoding | noncoding | noncoding |
| MSTRG. 86777. 1  |              | XLOC_087415 | 257 coding   | noncoding | noncoding | noncoding |
| MSTRG. 86802. 1  |              | XLOC_087424 | 236 coding   | noncoding | noncoding | noncoding |
| MSTRG. 86836. 1  | TCP11        | XLOC_087450 | 287 coding   | noncoding | noncoding | noncoding |
| MSTRG. 86845. 1  |              | XLOC_087469 | 301 coding   | coding    | noncoding | noncoding |
| MSTRG. 86890. 1  | PPARD        | XLOC_087471 | 298 coding   | noncoding | noncoding | noncoding |
| MSTRG. 86850. 1  |              | XLOC_087479 | 254 coding   | noncoding | noncoding | noncoding |
| MSTRG. 86886. 1  | TULP1        | XLOC_087485 | 235 coding   | noncoding | noncoding | noncoding |
| MSTRG. 86940. 4  | FKBP5        | XLOC_087487 | 3937 coding  | coding    | coding    | coding    |
| MSTRG. 86940. 10 | FKBP5        | XLOC_087487 | 1059 coding  | coding    | noncoding | coding    |
| MSTRG. 86938. 1  |              | XLOC_087496 | 244 coding   | noncoding | noncoding | noncoding |
| MSTRG. 87017. 1  | MAPK14       | XLOC_087521 | 235 coding   | noncoding | noncoding | noncoding |
| MSTRG. 87064. 1  |              | XLOC_087565 | 290 coding   | noncoding | noncoding | noncoding |
| MSTRG. 87115. 1  | CPNE5        | XLOC_087569 | 270 coding   | noncoding | noncoding | noncoding |
| MSTRG. 87127. 1  |              | XLOC_087582 | 207 coding   | noncoding | noncoding | noncoding |
| MSTRG. 87133. 1  |              | XLOC_087586 | 264 coding   | noncoding | noncoding | noncoding |
| MSTRG. 87149. 1  | TBC1D22B     | XLOC_087594 | 300 coding   | noncoding | noncoding | noncoding |
| MSTRG. 87141. 1  | LOC105375040 | XLOC_087599 | 222 coding   | noncoding | noncoding | noncoding |
| MSTRG. 87374. 1  | ZFAND3       | XLOC_087637 | 229 coding   | noncoding | coding    | noncoding |
| NM_001206927. 2  | DNAH8        | XLOC_087739 | 14663 coding | coding    | noncoding | coding    |
| MSTRG. 87213. 1  | DNAH8        | XLOC_087740 | 330 coding   | noncoding | noncoding | noncoding |
| MSTRG. 87204. 1  |              | XLOC_087756 | 201 coding   | noncoding | noncoding | noncoding |
| XM_006715045. 3  | DAAM2        | XLOC_087769 | 7438 coding  | coding    | coding    | coding    |
| MSTRG. 87259. 1  | LOC102723789 | XLOC_087775 | 227 coding   | noncoding | noncoding | noncoding |
| MSTRG. 87255. 1  |              | XLOC_087777 | 295 coding   | noncoding | noncoding | noncoding |
| MSTRG. 87321. 1  | LOC105375053 | XLOC_087819 | 217 coding   | coding    | noncoding | noncoding |
| MSTRG. 87561. 1  |              | XLOC_087862 | 299 coding   | noncoding | noncoding | noncoding |
| MSTRG. 87579. 1  |              | XLOC_087876 | 309 coding   | noncoding | noncoding | noncoding |
| MSTRG. 87581. 1  |              | XLOC_087877 | 301 coding   | noncoding | noncoding | noncoding |
| MSTRG. 87600. 1  | PGC          | XLOC_087884 | 213 coding   | noncoding | noncoding | noncoding |
| MSTRG. 87731. 1  | USP49        | XLOC_087896 | 218 coding   | noncoding | noncoding | noncoding |
| XR_926799. 2     | LOC105375059 | XLOC_087906 | 1172 coding  | noncoding | noncoding | noncoding |
| MSTRG. 87626. 1  | TAF8         | XLOC_087913 | 205 coding   | noncoding | noncoding | noncoding |
| NM_001319061. 1  | GUCA1A       | XLOC_087914 | 2331 coding  | coding    | coding    | coding    |
| MSTRG. 87637. 1  |              | XLOC_087926 | 289 coding   | noncoding | noncoding | noncoding |
| MSTRG. 87821. 1  |              | XLOC_087932 | 292 coding   | noncoding | noncoding | noncoding |
| MSTRG. 87843. 1  | UBR2         | XLOC_087952 | 331 coding   | noncoding | noncoding | noncoding |
| XM_024446389. 1  | BICRAL       | XLOC_087961 | 6407 coding  | coding    | coding    | coding    |

|                |              |             |             |           |           |           |
|----------------|--------------|-------------|-------------|-----------|-----------|-----------|
| NR_134562.1    | RPL7L1       | XLOC_087972 | 3922 coding | coding    | coding    | noncoding |
| MSTRG.87908.1  | CUL7         | XLOC_087989 | 245 coding  | noncoding | noncoding | noncoding |
| MSTRG.87935.1  | CUL9         | XLOC_088004 | 297 coding  | noncoding | noncoding | noncoding |
| MSTRG.87930.1  |              | XLOC_088015 | 247 coding  | noncoding | noncoding | noncoding |
| XR_002956312.1 | ABCC10       | XLOC_088018 | 5425 coding | coding    | coding    | coding    |
| MSTRG.87965.1  | TJAP1        | XLOC_088023 | 233 coding  | noncoding | noncoding | noncoding |
| MSTRG.88034.1  | MAD2L1BP     | XLOC_088028 | 254 coding  | noncoding | noncoding | noncoding |
| NR_160955.1    | C6orf223     | XLOC_088040 | 5293 coding | coding    | coding    | coding    |
| MSTRG.88064.1  |              | XLOC_088060 | 266 coding  | noncoding | noncoding | noncoding |
| NM_001271970.1 | HSP90AB1     | XLOC_088062 | 2644 coding | coding    | coding    | coding    |
| NM_001137560.2 | TMEM151B     | XLOC_088064 | 4911 coding | coding    | coding    | coding    |
| MSTRG.88087.1  | CDC5L        | XLOC_088078 | 248 coding  | noncoding | noncoding | noncoding |
| MSTRG.88790.1  | RUNX2        | XLOC_088096 | 321 coding  | noncoding | noncoding | noncoding |
| MSTRG.88807.1  | RUNX2        | XLOC_088111 | 265 coding  | noncoding | noncoding | noncoding |
| MSTRG.88208.1  | CYP39A1      | XLOC_088185 | 252 coding  | noncoding | noncoding | noncoding |
| MSTRG.88223.1  |              | XLOC_088217 | 272 coding  | noncoding | noncoding | noncoding |
| MSTRG.88316.1  |              | XLOC_088266 | 268 coding  | noncoding | noncoding | noncoding |
| MSTRG.88319.1  |              | XLOC_088268 | 418 coding  | noncoding | noncoding | noncoding |
| MSTRG.88359.1  | CRISP1       | XLOC_088290 | 252 coding  | noncoding | noncoding | noncoding |
| MSTRG.88381.1  |              | XLOC_088303 | 218 coding  | noncoding | noncoding | noncoding |
| XM_017011233.1 | TFAP2B       | XLOC_088309 | 6457 coding | coding    | coding    | coding    |
| MSTRG.88446.1  | PKHD1        | XLOC_088329 | 286 coding  | noncoding | noncoding | noncoding |
| MSTRG.88427.1  | LOC102724327 | XLOC_088342 | 345 coding  | noncoding | noncoding | noncoding |
| MSTRG.88469.1  |              | XLOC_088365 | 263 coding  | noncoding | noncoding | noncoding |
| MSTRG.88481.1  |              | XLOC_088367 | 373 coding  | noncoding | noncoding | noncoding |
| MSTRG.88541.1  |              | XLOC_088400 | 265 coding  | noncoding | noncoding | noncoding |
| MSTRG.88557.1  |              | XLOC_088410 | 266 coding  | noncoding | noncoding | noncoding |
| MSTRG.88555.1  |              | XLOC_088411 | 296 coding  | noncoding | noncoding | noncoding |
| NR_125842.1    | LOC101927189 | XLOC_088417 | 3168 coding | noncoding | noncoding | noncoding |
| MSTRG.88665.1  | LOC105375097 | XLOC_088428 | 260 coding  | noncoding | noncoding | noncoding |
| MSTRG.88675.1  | LOC107986606 | XLOC_088442 | 413 coding  | noncoding | noncoding | noncoding |
| NM_001010872.3 | FAM83B       | XLOC_088445 | 6244 coding | coding    | coding    | coding    |
| MSTRG.88682.1  |              | XLOC_088446 | 254 coding  | noncoding | noncoding | noncoding |
| MSTRG.88689.1  |              | XLOC_088449 | 284 coding  | noncoding | noncoding | noncoding |
| MSTRG.88699.1  | HCRTR2       | XLOC_088455 | 290 coding  | noncoding | noncoding | noncoding |
| MSTRG.88700.1  | HCRTR2       | XLOC_088456 | 290 coding  | noncoding | noncoding | noncoding |
| MSTRG.88703.1  | HCRTR2       | XLOC_088458 | 338 coding  | noncoding | noncoding | noncoding |
| MSTRG.88697.1  |              | XLOC_088460 | 262 coding  | noncoding | noncoding | noncoding |
| MSTRG.89010.1  | DST          | XLOC_088526 | 257 coding  | noncoding | noncoding | noncoding |
| NM_001318539.1 | BEND6        | XLOC_088530 | 3650 coding | noncoding | coding    | noncoding |
| MSTRG.89020.1  | KIAA1586     | XLOC_088531 | 491 coding  | noncoding | coding    | coding    |
| MSTRG.88869.1  |              | XLOC_088563 | 320 coding  | noncoding | noncoding | noncoding |
| MSTRG.88942.1  |              | XLOC_088602 | 320 coding  | noncoding | noncoding | noncoding |

|                 |              |             |             |           |           |           |
|-----------------|--------------|-------------|-------------|-----------|-----------|-----------|
| MSTRG. 88946. 1 |              | XLOC_088604 | 309 coding  | noncoding | noncoding | noncoding |
| MSTRG. 88953. 1 |              | XLOC_088606 | 337 coding  | noncoding | noncoding | noncoding |
| MSTRG. 89055. 1 |              | XLOC_088658 | 243 coding  | noncoding | noncoding | noncoding |
| MSTRG. 89066. 1 |              | XLOC_088667 | 296 coding  | coding    | noncoding | noncoding |
| MSTRG. 89071. 1 |              | XLOC_088669 | 293 coding  | noncoding | noncoding | noncoding |
| XM_011536112. 1 | PTP4A1       | XLOC_088687 | 4976 coding | coding    | coding    | coding    |
| MSTRG. 89382. 1 | EYS          | XLOC_088735 | 279 coding  | noncoding | noncoding | noncoding |
| MSTRG. 89399. 1 | EYS          | XLOC_088752 | 304 coding  | noncoding | noncoding | noncoding |
| MSTRG. 89413. 1 | EYS          | XLOC_088764 | 242 coding  | noncoding | noncoding | noncoding |
| MSTRG. 89111. 1 |              | XLOC_088771 | 232 coding  | noncoding | noncoding | noncoding |
| MSTRG. 89213. 1 |              | XLOC_088788 | 295 coding  | coding    | noncoding | noncoding |
| MSTRG. 89226. 1 |              | XLOC_088792 | 233 coding  | noncoding | noncoding | noncoding |
| MSTRG. 89227. 1 |              | XLOC_088794 | 314 coding  | noncoding | noncoding | noncoding |
| MSTRG. 89229. 1 | LOC102723883 | XLOC_088797 | 296 coding  | noncoding | noncoding | noncoding |
| MSTRG. 89232. 1 |              | XLOC_088800 | 203 coding  | noncoding | noncoding | noncoding |
| MSTRG. 89233. 1 |              | XLOC_088801 | 296 coding  | noncoding | noncoding | noncoding |
| MSTRG. 89289. 1 | ADGRB3       | XLOC_088817 | 291 coding  | noncoding | noncoding | noncoding |
| MSTRG. 89297. 1 | ADGRB3       | XLOC_088821 | 318 coding  | noncoding | noncoding | noncoding |
| MSTRG. 89244. 1 |              | XLOC_088825 | 273 coding  | noncoding | noncoding | noncoding |
| MSTRG. 89247. 1 |              | XLOC_088826 | 282 coding  | noncoding | noncoding | noncoding |
| MSTRG. 89459. 1 | COL19A1      | XLOC_088850 | 270 coding  | noncoding | noncoding | noncoding |
| MSTRG. 89329. 1 |              | XLOC_088868 | 267 coding  | noncoding | coding    | noncoding |
| MSTRG. 89330. 1 |              | XLOC_088869 | 294 coding  | noncoding | noncoding | noncoding |
| MSTRG. 89525. 1 | SMAP1        | XLOC_088872 | 245 coding  | noncoding | noncoding | noncoding |
| MSTRG. 89528. 1 | SMAP1        | XLOC_088874 | 255 coding  | noncoding | noncoding | noncoding |
| MSTRG. 89506. 1 | LINC01626    | XLOC_088903 | 241 coding  | noncoding | noncoding | noncoding |
| MSTRG. 89508. 1 |              | XLOC_088906 | 324 coding  | noncoding | noncoding | noncoding |
| NM_001350413. 1 | RIMS1        | XLOC_088911 | 2576 coding | noncoding | coding    | coding    |
| MSTRG. 89566. 1 | RIMS1        | XLOC_088917 | 216 coding  | noncoding | noncoding | noncoding |
| MSTRG. 89552. 1 |              | XLOC_088924 | 244 coding  | noncoding | noncoding | noncoding |
| MSTRG. 90286. 1 | KCNQ5        | XLOC_088962 | 237 coding  | noncoding | noncoding | noncoding |
| MSTRG. 90311. 1 | KCNQ5        | XLOC_088967 | 300 coding  | noncoding | noncoding | noncoding |
| MSTRG. 90313. 1 | KCNQ5        | XLOC_088968 | 247 coding  | noncoding | noncoding | noncoding |
| MSTRG. 89588. 1 | KHDC1        | XLOC_088973 | 245 coding  | noncoding | noncoding | noncoding |
| MSTRG. 89576. 1 |              | XLOC_088976 | 279 coding  | noncoding | noncoding | noncoding |
| MSTRG. 89641. 1 | CD109        | XLOC_088992 | 204 coding  | noncoding | noncoding | noncoding |
| MSTRG. 89643. 1 | CD109        | XLOC_088994 | 234 coding  | noncoding | noncoding | noncoding |
| MSTRG. 89622. 1 |              | XLOC_088999 | 232 coding  | noncoding | noncoding | noncoding |
| MSTRG. 89628. 1 |              | XLOC_089004 | 276 coding  | coding    | noncoding | noncoding |
| MSTRG. 89673. 1 | LOC105377858 | XLOC_089015 | 264 coding  | noncoding | noncoding | noncoding |
| MSTRG. 89680. 1 | LOC105377858 | XLOC_089019 | 209 coding  | noncoding | noncoding | noncoding |
| MSTRG. 89682. 1 |              | XLOC_089023 | 278 coding  | noncoding | noncoding | noncoding |
| MSTRG. 89718. 1 | FILIP1       | XLOC_089032 | 259 coding  | noncoding | noncoding | noncoding |

|                 |              |             |              |           |           |           |
|-----------------|--------------|-------------|--------------|-----------|-----------|-----------|
| MSTRG. 89805. 1 | SENP6        | XLOC_089064 | 288 coding   | coding    | noncoding | noncoding |
| MSTRG. 89806. 1 | SENP6        | XLOC_089065 | 253 coding   | noncoding | noncoding | noncoding |
| MSTRG. 89746. 1 |              | XLOC_089080 | 347 coding   | coding    | noncoding | noncoding |
| MSTRG. 89813. 1 |              | XLOC_089123 | 324 coding   | coding    | noncoding | noncoding |
| MSTRG. 89826. 1 | MEI4         | XLOC_089131 | 264 coding   | coding    | noncoding | noncoding |
| MSTRG. 89902. 1 |              | XLOC_089153 | 273 coding   | noncoding | noncoding | noncoding |
| MSTRG. 89910. 1 |              | XLOC_089160 | 307 coding   | noncoding | noncoding | noncoding |
| MSTRG. 89937. 1 |              | XLOC_089172 | 326 coding   | noncoding | noncoding | noncoding |
| MSTRG. 89938. 1 |              | XLOC_089173 | 305 coding   | noncoding | noncoding | noncoding |
| MSTRG. 90108. 1 | BCKDHB       | XLOC_089189 | 213 coding   | noncoding | noncoding | noncoding |
| MSTRG. 90027. 1 |              | XLOC_089214 | 311 coding   | noncoding | noncoding | noncoding |
| MSTRG. 90045. 1 |              | XLOC_089223 | 248 coding   | noncoding | noncoding | noncoding |
| MSTRG. 90046. 1 |              | XLOC_089224 | 273 coding   | noncoding | noncoding | noncoding |
| MSTRG. 90094. 1 | LINC02542    | XLOC_089288 | 289 coding   | noncoding | noncoding | noncoding |
| MSTRG. 90096. 1 | LINC02542    | XLOC_089290 | 340 coding   | noncoding | noncoding | noncoding |
| MSTRG. 90087. 1 |              | XLOC_089295 | 272 coding   | noncoding | noncoding | noncoding |
| MSTRG. 90175. 1 |              | XLOC_089304 | 498 coding   | coding    | noncoding | noncoding |
| MSTRG. 90221. 1 | LOC105377876 | XLOC_089306 | 276 coding   | coding    | noncoding | noncoding |
| MSTRG. 90393. 1 | ME1          | XLOC_089384 | 286 coding   | noncoding | noncoding | noncoding |
| MSTRG. 90371. 1 |              | XLOC_089394 | 644 coding   | noncoding | noncoding | noncoding |
| MSTRG. 90375. 1 |              | XLOC_089396 | 283 coding   | noncoding | noncoding | noncoding |
| MSTRG. 90377. 1 |              | XLOC_089397 | 310 coding   | noncoding | noncoding | noncoding |
| MSTRG. 90378. 1 |              | XLOC_089398 | 237 coding   | noncoding | noncoding | noncoding |
| MSTRG. 90414. 1 | SNAP91       | XLOC_089401 | 312 coding   | noncoding | noncoding | noncoding |
| MSTRG. 90406. 1 | LOC105377879 | XLOC_089406 | 337 coding   | noncoding | noncoding | noncoding |
| MSTRG. 90469. 1 | CYB5R4       | XLOC_089417 | 302 coding   | noncoding | noncoding | noncoding |
| XM_017010220. 1 | MRAP2        | XLOC_089448 | 2781 coding  | coding    | coding    | coding    |
| MSTRG. 90510. 1 |              | XLOC_089470 | 297 coding   | coding    | noncoding | noncoding |
| MSTRG. 90557. 1 | LOC107986622 | XLOC_089493 | 261 coding   | noncoding | noncoding | noncoding |
| MSTRG. 90561. 1 | LOC107986622 | XLOC_089494 | 271 coding   | noncoding | noncoding | noncoding |
| MSTRG. 90567. 1 |              | XLOC_089498 | 290 coding   | noncoding | noncoding | noncoding |
| MSTRG. 90575. 1 | LOC101928842 | XLOC_089500 | 238 coding   | noncoding | noncoding | noncoding |
| MSTRG. 90569. 1 |              | XLOC_089501 | 258 coding   | noncoding | noncoding | noncoding |
| MSTRG. 90570. 1 |              | XLOC_089502 | 235 coding   | noncoding | noncoding | noncoding |
| MSTRG. 90580. 1 |              | XLOC_089506 | 296 coding   | noncoding | noncoding | noncoding |
| MSTRG. 90585. 1 |              | XLOC_089509 | 286 coding   | noncoding | noncoding | noncoding |
| MSTRG. 90589. 1 |              | XLOC_089513 | 297 coding   | noncoding | noncoding | noncoding |
| MSTRG. 90593. 1 |              | XLOC_089515 | 235 coding   | noncoding | noncoding | noncoding |
| MSTRG. 90595. 1 |              | XLOC_089517 | 324 coding   | noncoding | noncoding | noncoding |
| MSTRG. 90604. 1 | HTR1E        | XLOC_089522 | 462 coding   | noncoding | noncoding | noncoding |
| XM_011535625. 2 | ZNF292       | XLOC_089527 | 10404 coding | coding    | coding    | coding    |
| MSTRG. 90791. 1 | ORC3         | XLOC_089565 | 301 coding   | noncoding | noncoding | noncoding |
| MSTRG. 90651. 1 | LOC101928911 | XLOC_089577 | 397 coding   | noncoding | noncoding | noncoding |

|                 |              |             |             |           |           |           |
|-----------------|--------------|-------------|-------------|-----------|-----------|-----------|
| MSTRG. 90749. 1 |              | XLOC_089607 | 278 coding  | noncoding | noncoding | noncoding |
| MSTRG. 90822. 1 | PM20D2       | XLOC_089620 | 241 coding  | noncoding | noncoding | noncoding |
| MSTRG. 90982. 1 | ANKRD6       | XLOC_089652 | 311 coding  | noncoding | noncoding | noncoding |
| MSTRG. 90987. 1 | ANKRD6       | XLOC_089653 | 219 coding  | noncoding | noncoding | noncoding |
| MSTRG. 90988. 1 | ANKRD6       | XLOC_089654 | 243 coding  | noncoding | noncoding | noncoding |
| MSTRG. 91038. 1 |              | XLOC_089706 | 293 coding  | noncoding | noncoding | noncoding |
| MSTRG. 91039. 1 |              | XLOC_089713 | 298 coding  | noncoding | noncoding | noncoding |
| MSTRG. 91142. 1 |              | XLOC_089779 | 358 coding  | noncoding | noncoding | noncoding |
| MSTRG. 91230. 1 |              | XLOC_089838 | 224 coding  | noncoding | noncoding | noncoding |
| MSTRG. 91234. 1 |              | XLOC_089840 | 292 coding  | noncoding | noncoding | noncoding |
| MSTRG. 91246. 1 |              | XLOC_089845 | 219 coding  | noncoding | noncoding | noncoding |
| MSTRG. 91266. 1 |              | XLOC_089860 | 292 coding  | noncoding | noncoding | noncoding |
| MSTRG. 91294. 1 | FUT9         | XLOC_089871 | 243 coding  | noncoding | noncoding | noncoding |
| MSTRG. 91298. 1 |              | XLOC_089895 | 282 coding  | coding    | noncoding | noncoding |
| MSTRG. 91451. 1 | KLHL32       | XLOC_089908 | 285 coding  | noncoding | noncoding | noncoding |
| MSTRG. 91340. 1 |              | XLOC_089912 | 236 coding  | noncoding | noncoding | noncoding |
| MSTRG. 91360. 1 | LOC101927314 | XLOC_089917 | 245 coding  | noncoding | noncoding | noncoding |
| MSTRG. 91365. 1 | LOC101927314 | XLOC_089919 | 310 coding  | coding    | noncoding | noncoding |
| MSTRG. 91378. 1 |              | XLOC_089933 | 258 coding  | noncoding | noncoding | noncoding |
| MSTRG. 91383. 1 |              | XLOC_089936 | 251 coding  | noncoding | noncoding | noncoding |
| MSTRG. 91388. 1 |              | XLOC_089941 | 249 coding  | noncoding | noncoding | noncoding |
| XR_001743062. 2 | TSTD3        | XLOC_089966 | 1487 coding | coding    | noncoding | noncoding |
| MSTRG. 91519. 1 | SIM1         | XLOC_089990 | 308 coding  | noncoding | noncoding | noncoding |
| MSTRG. 91767. 5 | ASCC3        | XLOC_089997 | 1388 coding | coding    | coding    | noncoding |
| MSTRG. 91823. 1 | LOC107984041 | XLOC_090006 | 830 coding  | noncoding | noncoding | noncoding |
| MSTRG. 91648. 1 |              | XLOC_090030 | 232 coding  | noncoding | noncoding | noncoding |
| MSTRG. 91664. 1 |              | XLOC_090035 | 285 coding  | noncoding | noncoding | noncoding |
| MSTRG. 91668. 1 |              | XLOC_090039 | 275 coding  | coding    | noncoding | noncoding |
| MSTRG. 91669. 1 |              | XLOC_090040 | 289 coding  | noncoding | noncoding | noncoding |
| MSTRG. 91688. 1 |              | XLOC_090051 | 228 coding  | noncoding | noncoding | noncoding |
| MSTRG. 91689. 1 |              | XLOC_090052 | 284 coding  | noncoding | noncoding | noncoding |
| MSTRG. 91746. 1 |              | XLOC_090075 | 269 coding  | coding    | noncoding | noncoding |
| NR_037157. 1    | BVES-AS1     | XLOC_090080 | 1716 coding | noncoding | noncoding | noncoding |
| MSTRG. 91760. 1 | BVES-AS1     | XLOC_090081 | 278 coding  | noncoding | noncoding | noncoding |
| MSTRG. 91946. 1 | PRDM1        | XLOC_090129 | 304 coding  | noncoding | noncoding | noncoding |
| MSTRG. 92016. 1 | CRYBG1       | XLOC_090146 | 608 coding  | noncoding | noncoding | noncoding |
| MSTRG. 92024. 1 | CRYBG1       | XLOC_090151 | 301 coding  | noncoding | noncoding | noncoding |
| MSTRG. 91985. 1 |              | XLOC_090186 | 245 coding  | noncoding | noncoding | noncoding |
| MSTRG. 91996. 1 |              | XLOC_090188 | 268 coding  | noncoding | noncoding | noncoding |
| MSTRG. 92000. 1 |              | XLOC_090191 | 251 coding  | noncoding | noncoding | noncoding |
| MSTRG. 92001. 1 |              | XLOC_090192 | 298 coding  | noncoding | noncoding | noncoding |
| MSTRG. 92006. 1 | C6orf203     | XLOC_090194 | 269 coding  | noncoding | noncoding | noncoding |
| MSTRG. 92069. 1 |              | XLOC_090218 | 201 coding  | noncoding | noncoding | noncoding |

|                  |              |             |              |           |           |           |
|------------------|--------------|-------------|--------------|-----------|-----------|-----------|
| MSTRG. 92070. 1  |              | XLOC_090219 | 259 coding   | noncoding | noncoding | noncoding |
| MSTRG. 92083. 1  |              | XLOC_090230 | 256 coding   | noncoding | noncoding | noncoding |
| MSTRG. 92172. 1  | LOC105377932 | XLOC_090244 | 302 coding   | noncoding | noncoding | noncoding |
| MSTRG. 92187. 1  | AFG1L        | XLOC_090249 | 321 coding   | noncoding | noncoding | noncoding |
| MSTRG. 92190. 1  | AFG1L        | XLOC_090250 | 294 coding   | coding    | noncoding | noncoding |
| MSTRG. 92202. 1  |              | XLOC_090266 | 249 coding   | noncoding | noncoding | noncoding |
| MSTRG. 92297. 1  |              | XLOC_090271 | 290 coding   | noncoding | noncoding | noncoding |
| MSTRG. 92300. 1  | ARMC2        | XLOC_090273 | 247 coding   | noncoding | noncoding | noncoding |
| MSTRG. 92303. 1  | ARMC2        | XLOC_090276 | 248 coding   | noncoding | noncoding | noncoding |
| MSTRG. 92307. 1  | ARMC2        | XLOC_090277 | 235 coding   | noncoding | noncoding | noncoding |
| MSTRG. 92317. 1  | ARMC2        | XLOC_090281 | 229 coding   | noncoding | noncoding | noncoding |
| NM_001083535. 2  | CEP57L1      | XLOC_090282 | 6647 coding  | coding    | coding    | coding    |
| XM_011536281. 3  | FIG4         | XLOC_090321 | 3638 coding  | coding    | coding    | coding    |
| MSTRG. 92259. 1  |              | XLOC_090352 | 222 coding   | coding    | noncoding | noncoding |
| NM_001287216. 1  | AMD1         | XLOC_090408 | 3064 coding  | coding    | coding    | coding    |
| MSTRG. 92430. 1  |              | XLOC_090416 | 230 coding   | noncoding | noncoding | noncoding |
| MSTRG. 92863. 1  | SLC16A10     | XLOC_090425 | 268 coding   | noncoding | noncoding | noncoding |
| MSTRG. 92750. 17 | LOC105377945 | XLOC_090439 | 8231 coding  | coding    | coding    | noncoding |
| MSTRG. 92750. 32 | LOC105377945 | XLOC_090439 | 2032 coding  | coding    | coding    | noncoding |
| MSTRG. 92548. 1  | LOC105377947 | XLOC_090444 | 473 coding   | noncoding | noncoding | noncoding |
| MSTRG. 92579. 1  | LAMA4        | XLOC_090453 | 523 coding   | noncoding | noncoding | noncoding |
| MSTRG. 92563. 1  |              | XLOC_090457 | 338 coding   | coding    | coding    | noncoding |
| MSTRG. 92590. 1  |              | XLOC_090461 | 456 coding   | noncoding | noncoding | noncoding |
| MSTRG. 92615. 1  |              | XLOC_090476 | 293 coding   | noncoding | noncoding | noncoding |
| MSTRG. 92620. 1  |              | XLOC_090480 | 216 coding   | noncoding | noncoding | noncoding |
| MSTRG. 92628. 1  |              | XLOC_090484 | 264 coding   | noncoding | noncoding | noncoding |
| MSTRG. 92630. 1  |              | XLOC_090486 | 274 coding   | noncoding | noncoding | noncoding |
| MSTRG. 92733. 1  |              | XLOC_090540 | 464 coding   | noncoding | noncoding | noncoding |
| NM_001322940. 2  | DSE          | XLOC_090580 | 11177 coding | coding    | coding    | coding    |
| MSTRG. 93059. 1  | DSE          | XLOC_090590 | 300 coding   | noncoding | noncoding | noncoding |
| NM_173560. 4     | RFX6         | XLOC_090620 | 3476 coding  | coding    | coding    | coding    |
| MSTRG. 92826. 1  | RFX6         | XLOC_090621 | 314 coding   | noncoding | noncoding | noncoding |
| MSTRG. 92952. 1  | NUS1         | XLOC_090639 | 407 coding   | noncoding | noncoding | noncoding |
| MSTRG. 92944. 1  |              | XLOC_090643 | 317 coding   | noncoding | noncoding | noncoding |
| MSTRG. 93071. 1  |              | XLOC_090663 | 281 coding   | noncoding | noncoding | noncoding |
| MSTRG. 93144. 1  | FAM184A      | XLOC_090734 | 278 coding   | noncoding | noncoding | noncoding |
| MSTRG. 93204. 1  |              | XLOC_090764 | 303 coding   | noncoding | noncoding | noncoding |
| MSTRG. 93262. 1  |              | XLOC_090777 | 268 coding   | noncoding | noncoding | noncoding |
| MSTRG. 93263. 1  |              | XLOC_090778 | 263 coding   | noncoding | noncoding | noncoding |
| MSTRG. 93426. 3  | TBC1D32      | XLOC_090796 | 891 coding   | coding    | noncoding | noncoding |
| NM_000165. 5     | GJA1         | XLOC_090799 | 3083 coding  | coding    | coding    | coding    |
| MSTRG. 93288. 1  |              | XLOC_090801 | 229 coding   | noncoding | noncoding | noncoding |
| MSTRG. 93296. 1  |              | XLOC_090803 | 200 coding   | noncoding | noncoding | noncoding |

|                  |              |             |              |           |           |           |
|------------------|--------------|-------------|--------------|-----------|-----------|-----------|
| MSTRG. 93295. 1  |              | XLOC_090804 | 268 coding   | noncoding | noncoding | noncoding |
| MSTRG. 93301. 1  |              | XLOC_090806 | 661 coding   | noncoding | noncoding | noncoding |
| MSTRG. 93328. 1  | LOC105377979 | XLOC_090813 | 358 coding   | noncoding | noncoding | noncoding |
| MSTRG. 93305. 1  |              | XLOC_090816 | 394 coding   | noncoding | noncoding | noncoding |
| MSTRG. 93306. 1  |              | XLOC_090817 | 255 coding   | noncoding | noncoding | noncoding |
| MSTRG. 93311. 1  |              | XLOC_090819 | 293 coding   | noncoding | noncoding | noncoding |
| MSTRG. 93334. 1  |              | XLOC_090835 | 285 coding   | noncoding | noncoding | noncoding |
| MSTRG. 93342. 1  |              | XLOC_090839 | 261 coding   | noncoding | noncoding | noncoding |
| MSTRG. 93498. 1  | NKAIN2       | XLOC_090856 | 257 coding   | noncoding | noncoding | noncoding |
| MSTRG. 93535. 1  | NKAIN2       | XLOC_090869 | 227 coding   | noncoding | noncoding | noncoding |
| NR_136734. 1     | RNF217       | XLOC_090881 | 11447 coding | coding    | coding    | coding    |
| MSTRG. 93570. 1  |              | XLOC_090908 | 276 coding   | noncoding | noncoding | noncoding |
| XM_024446331. 1  | NCOA7        | XLOC_090917 | 5559 coding  | coding    | coding    | coding    |
| MSTRG. 93637. 1  | NCOA7        | XLOC_090921 | 228 coding   | noncoding | noncoding | noncoding |
| MSTRG. 93674. 1  |              | XLOC_090956 | 281 coding   | noncoding | noncoding | noncoding |
| MSTRG. 93696. 1  |              | XLOC_090963 | 283 coding   | noncoding | noncoding | noncoding |
| MSTRG. 93701. 1  |              | XLOC_090964 | 423 coding   | coding    | noncoding | noncoding |
| NM_001242850. 1  | RNF146       | XLOC_090969 | 2145 coding  | coding    | coding    | coding    |
| MSTRG. 93906. 1  | PTPRK        | XLOC_091033 | 260 coding   | noncoding | noncoding | noncoding |
| XM_017010852. 1  | LAMA2        | XLOC_091040 | 11234 coding | coding    | coding    | coding    |
| MSTRG. 93944. 1  | LAMA2        | XLOC_091049 | 286 coding   | noncoding | noncoding | noncoding |
| MSTRG. 93952. 1  | LAMA2        | XLOC_091051 | 396 coding   | noncoding | noncoding | noncoding |
| MSTRG. 93909. 1  |              | XLOC_091083 | 281 coding   | noncoding | noncoding | noncoding |
| XR_002956397. 1  | LOC112267974 | XLOC_091096 | 3671 coding  | noncoding | noncoding | noncoding |
| MSTRG. 94008. 1  |              | XLOC_091102 | 297 coding   | noncoding | noncoding | noncoding |
| MSTRG. 94017. 1  |              | XLOC_091108 | 509 coding   | noncoding | noncoding | noncoding |
| MSTRG. 94022. 1  |              | XLOC_091111 | 200 coding   | noncoding | noncoding | noncoding |
| MSTRG. 94055. 1  | LOC102723445 | XLOC_091122 | 296 coding   | noncoding | coding    | noncoding |
| MSTRG. 94242. 2  | MED23        | XLOC_091217 | 5371 coding  | coding    | coding    | coding    |
| MSTRG. 94109. 1  |              | XLOC_091235 | 248 coding   | noncoding | noncoding | noncoding |
| MSTRG. 94110. 1  |              | XLOC_091237 | 228 coding   | noncoding | noncoding | noncoding |
| MSTRG. 94305. 4  | SLC18B1      | XLOC_091253 | 2440 coding  | coding    | coding    | noncoding |
| MSTRG. 94301. 1  |              | XLOC_091258 | 295 coding   | coding    | noncoding | noncoding |
| MSTRG. 94319. 1  |              | XLOC_091266 | 325 coding   | noncoding | noncoding | noncoding |
| MSTRG. 94374. 1  |              | XLOC_091289 | 247 coding   | noncoding | noncoding | noncoding |
| MSTRG. 94443. 9  | SGK1         | XLOC_091291 | 3101 coding  | noncoding | noncoding | coding    |
| MSTRG. 94413. 1  | CT69         | XLOC_091312 | 274 coding   | noncoding | noncoding | noncoding |
| MSTRG. 94425. 1  | LOC101928277 | XLOC_091319 | 521 coding   | noncoding | noncoding | noncoding |
| MSTRG. 94430. 1  | LOC101928277 | XLOC_091322 | 299 coding   | noncoding | noncoding | noncoding |
| MSTRG. 94463. 1  |              | XLOC_091345 | 261 coding   | noncoding | noncoding | noncoding |
| MSTRG. 94597. 1  | PDE7B        | XLOC_091380 | 295 coding   | noncoding | noncoding | noncoding |
| MSTRG. 94604. 1  | MTFR2        | XLOC_091383 | 405 coding   | coding    | noncoding | noncoding |
| MSTRG. 94606. 17 | BCLAF1       | XLOC_091384 | 4052 coding  | coding    | noncoding | noncoding |

|                  |              |             |              |           |           |           |
|------------------|--------------|-------------|--------------|-----------|-----------|-----------|
| MSTRG. 94606. 21 | BCLAF1       | XLOC_091384 | 5218 coding  | coding    | noncoding | noncoding |
| MSTRG. 94541. 1  |              | XLOC_091385 | 281 coding   | noncoding | noncoding | noncoding |
| MSTRG. 94548. 1  |              | XLOC_091389 | 231 coding   | noncoding | noncoding | noncoding |
| MSTRG. 94784. 5  | MAP3K5       | XLOC_091403 | 4427 coding  | coding    | coding    | coding    |
| MSTRG. 94625. 1  |              | XLOC_091412 | 603 coding   | noncoding | noncoding | noncoding |
| MSTRG. 94637. 1  | IL22RA2      | XLOC_091415 | 402 coding   | noncoding | noncoding | noncoding |
| MSTRG. 94662. 1  |              | XLOC_091417 | 255 coding   | noncoding | noncoding | noncoding |
| MSTRG. 94678. 1  | LOC102723633 | XLOC_091425 | 277 coding   | noncoding | noncoding | noncoding |
| MSTRG. 94683. 1  |              | XLOC_091428 | 302 coding   | noncoding | noncoding | noncoding |
| MSTRG. 94686. 1  |              | XLOC_091429 | 368 coding   | noncoding | noncoding | noncoding |
| MSTRG. 94689. 1  |              | XLOC_091431 | 225 coding   | noncoding | noncoding | noncoding |
| MSTRG. 94708. 1  |              | XLOC_091462 | 265 coding   | noncoding | noncoding | noncoding |
| MSTRG. 94710. 1  |              | XLOC_091464 | 224 coding   | noncoding | noncoding | noncoding |
| MSTRG. 94753. 1  |              | XLOC_091476 | 314 coding   | noncoding | noncoding | noncoding |
| MSTRG. 94850. 1  | NHSL1        | XLOC_091495 | 271 coding   | noncoding | noncoding | noncoding |
| MSTRG. 94900. 2  | REPS1        | XLOC_091521 | 2726 coding  | coding    | noncoding | coding    |
| MSTRG. 94921. 1  |              | XLOC_091550 | 280 coding   | noncoding | noncoding | noncoding |
| MSTRG. 94973. 1  | FILNC1       | XLOC_091556 | 209 coding   | noncoding | noncoding | noncoding |
| MSTRG. 95022. 1  | LOC105378027 | XLOC_091577 | 272 coding   | noncoding | noncoding | noncoding |
| MSTRG. 95003. 1  |              | XLOC_091579 | 270 coding   | noncoding | noncoding | noncoding |
| MSTRG. 95056. 1  |              | XLOC_091604 | 303 coding   | noncoding | noncoding | noncoding |
| MSTRG. 95083. 1  | LOC105378031 | XLOC_091620 | 304 coding   | noncoding | noncoding | noncoding |
| MSTRG. 95076. 1  |              | XLOC_091631 | 267 coding   | noncoding | noncoding | noncoding |
| MSTRG. 95116. 1  | LOC153910    | XLOC_091645 | 282 coding   | noncoding | noncoding | noncoding |
| MSTRG. 95171. 14 | HIVEP2       | XLOC_091651 | 4309 coding  | coding    | coding    | coding    |
| MSTRG. 95171. 19 | HIVEP2       | XLOC_091651 | 5533 coding  | noncoding | coding    | noncoding |
| MSTRG. 95167. 1  | AIG1         | XLOC_091674 | 287 coding   | noncoding | noncoding | noncoding |
| MSTRG. 95284. 1  | ZC2HC1B      | XLOC_091718 | 256 coding   | noncoding | noncoding | noncoding |
| MSTRG. 95293. 1  |              | XLOC_091726 | 233 coding   | noncoding | noncoding | noncoding |
| MSTRG. 95463. 1  |              | XLOC_091740 | 301 coding   | noncoding | noncoding | noncoding |
| MSTRG. 95464. 1  |              | XLOC_091741 | 241 coding   | noncoding | noncoding | noncoding |
| XM_024446536. 1  | UTRN         | XLOC_091742 | 12372 coding | coding    | noncoding | coding    |
| MSTRG. 95350. 1  |              | XLOC_091827 | 315 coding   | noncoding | noncoding | noncoding |
| MSTRG. 95363. 1  |              | XLOC_091832 | 231 coding   | noncoding | noncoding | noncoding |
| MSTRG. 95366. 1  |              | XLOC_091833 | 212 coding   | coding    | noncoding | noncoding |
| MSTRG. 95367. 1  | TRQ-TTG4-1   | XLOC_091835 | 222 coding   | noncoding | noncoding | noncoding |
| MSTRG. 95585. 3  | EPM2A        | XLOC_091840 | 383 coding   | noncoding | noncoding | noncoding |
| NM_001278065. 2  | GRM1         | XLOC_091851 | 6917 coding  | coding    | coding    | coding    |
| MSTRG. 95396. 1  |              | XLOC_091860 | 236 coding   | noncoding | noncoding | noncoding |
| MSTRG. 95399. 1  |              | XLOC_091861 | 268 coding   | noncoding | noncoding | noncoding |
| NM_024694. 4     | ADGB         | XLOC_091862 | 5318 coding  | coding    | coding    | coding    |
| MSTRG. 95418. 1  | ADGB         | XLOC_091870 | 236 coding   | noncoding | noncoding | noncoding |
| MSTRG. 95425. 1  |              | XLOC_091925 | 300 coding   | noncoding | noncoding | noncoding |

|                  |              |             |              |           |           |           |
|------------------|--------------|-------------|--------------|-----------|-----------|-----------|
| MSTRG. 95447. 1  |              | XLOC_091935 | 225 coding   | noncoding | noncoding | noncoding |
| XM_024446385. 1  | SASH1        | XLOC_091936 | 8682 coding  | coding    | coding    | coding    |
| MSTRG. 95562. 1  | SASH1        | XLOC_091939 | 485 coding   | noncoding | noncoding | noncoding |
| XR_001743088. 2  | UST          | XLOC_091949 | 1694 coding  | coding    | coding    | coding    |
| MSTRG. 95759. 1  |              | XLOC_092031 | 225 coding   | noncoding | noncoding | noncoding |
| MSTRG. 95763. 9  | PCMT1        | XLOC_092034 | 465 coding   | coding    | coding    | noncoding |
| MSTRG. 95765. 1  | PCMT1        | XLOC_092035 | 347 coding   | noncoding | noncoding | noncoding |
| MSTRG. 95735. 1  | RAET1E       | XLOC_092042 | 266 coding   | noncoding | noncoding | noncoding |
| MSTRG. 95736. 1  | RAET1E       | XLOC_092043 | 287 coding   | noncoding | noncoding | noncoding |
| MSTRG. 95739. 1  | RAET1G       | XLOC_092045 | 247 coding   | noncoding | noncoding | noncoding |
| MSTRG. 95740. 1  | RAET1G       | XLOC_092046 | 284 coding   | noncoding | noncoding | noncoding |
| MSTRG. 95722. 1  |              | XLOC_092047 | 290 coding   | noncoding | noncoding | noncoding |
| MSTRG. 95730. 1  |              | XLOC_092056 | 245 coding   | noncoding | noncoding | noncoding |
| MSTRG. 95797. 1  | PPP1R14C     | XLOC_092063 | 291 coding   | noncoding | noncoding | noncoding |
| NM_001164694. 2  | IYD          | XLOC_092066 | 8734 coding  | coding    | coding    | coding    |
| MSTRG. 95775. 1  |              | XLOC_092069 | 267 coding   | noncoding | noncoding | noncoding |
| MSTRG. 95779. 1  |              | XLOC_092073 | 276 coding   | noncoding | noncoding | noncoding |
| NM_001329801. 2  | PLEKHG1      | XLOC_092074 | 7127 coding  | coding    | coding    | coding    |
| MSTRG. 95858. 1  | MTHFD1L      | XLOC_092081 | 274 coding   | noncoding | noncoding | noncoding |
| MSTRG. 95814. 1  |              | XLOC_092083 | 263 coding   | noncoding | noncoding | noncoding |
| XM_017011517. 2  | AKAP12       | XLOC_092085 | 8562 coding  | coding    | coding    | coding    |
| MSTRG. 95887. 1  | AKAP12       | XLOC_092088 | 267 coding   | noncoding | noncoding | noncoding |
| MSTRG. 96409. 39 | SYNE1-AS1    | XLOC_092103 | 17075 coding | coding    | coding    | coding    |
| MSTRG. 96439. 1  | ESR1         | XLOC_092107 | 262 coding   | noncoding | noncoding | noncoding |
| MSTRG. 96037. 1  |              | XLOC_092124 | 284 coding   | noncoding | noncoding | noncoding |
| MSTRG. 96109. 1  | RGS17        | XLOC_092139 | 280 coding   | noncoding | noncoding | noncoding |
| MSTRG. 96110. 1  | RGS17        | XLOC_092140 | 211 coding   | noncoding | noncoding | noncoding |
| MSTRG. 96071. 1  | LOC105378066 | XLOC_092152 | 208 coding   | noncoding | noncoding | noncoding |
| MSTRG. 96073. 1  |              | XLOC_092156 | 251 coding   | noncoding | noncoding | noncoding |
| MSTRG. 96121. 1  |              | XLOC_092175 | 287 coding   | noncoding | noncoding | noncoding |
| MSTRG. 96136. 1  |              | XLOC_092179 | 237 coding   | noncoding | noncoding | noncoding |
| NM_001286189. 1  | SCAF8        | XLOC_092184 | 4908 coding  | coding    | coding    | coding    |
| MSTRG. 96269. 1  |              | XLOC_092213 | 230 coding   | noncoding | noncoding | noncoding |
| MSTRG. 96177. 1  |              | XLOC_092217 | 277 coding   | noncoding | noncoding | noncoding |
| MSTRG. 96187. 1  | LOC105378068 | XLOC_092220 | 293 coding   | noncoding | noncoding | noncoding |
| MSTRG. 96199. 1  |              | XLOC_092428 | 212 coding   | noncoding | noncoding | noncoding |
| MSTRG. 96209. 1  |              | XLOC_092433 | 279 coding   | noncoding | noncoding | noncoding |
| MSTRG. 96219. 1  |              | XLOC_092437 | 307 coding   | noncoding | noncoding | noncoding |
| MSTRG. 96301. 1  |              | XLOC_092531 | 276 coding   | noncoding | noncoding | noncoding |
| MSTRG. 96319. 1  | SNX9         | XLOC_092539 | 252 coding   | coding    | noncoding | noncoding |
| MSTRG. 96686. 24 | EZR-AS1      | XLOC_092584 | 3190 coding  | coding    | coding    | coding    |
| MSTRG. 96562. 1  |              | XLOC_092590 | 317 coding   | noncoding | noncoding | noncoding |
| NM_032532. 3     | FNDC1        | XLOC_092625 | 6548 coding  | coding    | coding    | coding    |

|                  |              |             |             |           |           |           |
|------------------|--------------|-------------|-------------|-----------|-----------|-----------|
| MSTRG. 96666. 1  | FNDC1        | XLOC_092628 | 280 coding  | noncoding | noncoding | noncoding |
| MSTRG. 96654. 1  |              | XLOC_092631 | 247 coding  | noncoding | noncoding | noncoding |
| XM_024446597. 1  | WTAP         | XLOC_092685 | 1942 coding | coding    | coding    | coding    |
| MSTRG. 97092. 1  | SLC22A2      | XLOC_092743 | 228 coding  | noncoding | noncoding | noncoding |
| MSTRG. 97134. 1  |              | XLOC_092761 | 236 coding  | noncoding | noncoding | noncoding |
| MSTRG. 97112. 1  |              | XLOC_092763 | 215 coding  | noncoding | noncoding | noncoding |
| NM_001291958. 1  | MAP3K4       | XLOC_092767 | 5645 coding | coding    | coding    | coding    |
| MSTRG. 97209. 1  | MAP3K4       | XLOC_092773 | 361 coding  | noncoding | noncoding | noncoding |
| XM_006715344. 4  | PACRG        | XLOC_092837 | 7362 coding | coding    | coding    | coding    |
| MSTRG. 97784. 1  | PRKN         | XLOC_092851 | 269 coding  | noncoding | noncoding | noncoding |
| MSTRG. 97960. 1  | PACRG-AS1    | XLOC_092980 | 264 coding  | noncoding | noncoding | noncoding |
| MSTRG. 97298. 1  | LOC107986667 | XLOC_093076 | 293 coding  | noncoding | noncoding | noncoding |
| MSTRG. 97309. 1  |              | XLOC_093080 | 276 coding  | noncoding | noncoding | noncoding |
| MSTRG. 97324. 1  |              | XLOC_093087 | 306 coding  | noncoding | noncoding | noncoding |
| MSTRG. 97461. 1  |              | XLOC_093144 | 289 coding  | noncoding | noncoding | noncoding |
| MSTRG. 97476. 1  |              | XLOC_093147 | 733 coding  | coding    | noncoding | noncoding |
| XM_011535907. 2  | UNC93A       | XLOC_093148 | 2741 coding | coding    | coding    | coding    |
| MSTRG. 97484. 1  |              | XLOC_093154 | 259 coding  | noncoding | noncoding | noncoding |
| MSTRG. 97520. 1  | KIF25        | XLOC_093187 | 237 coding  | noncoding | noncoding | noncoding |
| MSTRG. 97576. 1  |              | XLOC_093227 | 248 coding  | noncoding | noncoding | noncoding |
| NM_001286380. 1  | FAM120B      | XLOC_093300 | 5207 coding | noncoding | coding    | coding    |
| MSTRG. 83729. 1  | LOC102723922 | XLOC_093324 | 225 coding  | noncoding | noncoding | noncoding |
| MSTRG. 83747. 1  | LOC105374873 | XLOC_093361 | 256 coding  | noncoding | noncoding | noncoding |
| MSTRG. 83776. 1  |              | XLOC_093377 | 286 coding  | noncoding | noncoding | noncoding |
| XR_926373. 2     | LOC105374880 | XLOC_093381 | 2137 coding | noncoding | coding    | noncoding |
| MSTRG. 83787. 1  | LOC102723944 | XLOC_093384 | 240 coding  | noncoding | noncoding | noncoding |
| MSTRG. 84424. 1  | GMDS         | XLOC_093423 | 292 coding  | noncoding | noncoding | noncoding |
| MSTRG. 83829. 1  |              | XLOC_093464 | 251 coding  | noncoding | noncoding | noncoding |
| MSTRG. 83838. 13 | MYLK4        | XLOC_093467 | 2436 coding | coding    | noncoding | noncoding |
| MSTRG. 83871. 1  |              | XLOC_093495 | 218 coding  | noncoding | noncoding | noncoding |
| MSTRG. 83923. 1  |              | XLOC_093514 | 254 coding  | noncoding | noncoding | noncoding |
| MSTRG. 83928. 1  |              | XLOC_093520 | 274 coding  | noncoding | noncoding | noncoding |
| MSTRG. 83938. 1  | LOC100507336 | XLOC_093525 | 255 coding  | noncoding | noncoding | noncoding |
| MSTRG. 83939. 1  | LOC100507336 | XLOC_093526 | 288 coding  | noncoding | noncoding | noncoding |
| MSTRG. 83948. 1  |              | XLOC_093532 | 318 coding  | noncoding | noncoding | noncoding |
| MSTRG. 84025. 1  |              | XLOC_093565 | 292 coding  | noncoding | noncoding | noncoding |
| MSTRG. 84067. 3  | CDYL         | XLOC_093572 | 1637 coding | coding    | coding    | coding    |
| MSTRG. 84145. 1  | F13A1        | XLOC_093631 | 3891 coding | coding    | coding    | coding    |
| MSTRG. 84145. 3  | F13A1        | XLOC_093631 | 841 coding  | coding    | coding    | noncoding |
| MSTRG. 84189. 1  |              | XLOC_093657 | 242 coding  | noncoding | noncoding | noncoding |
| MSTRG. 84193. 1  | LOC105374903 | XLOC_093659 | 270 coding  | noncoding | noncoding | noncoding |
| MSTRG. 84203. 1  |              | XLOC_093667 | 266 coding  | noncoding | noncoding | noncoding |
| MSTRG. 84270. 1  |              | XLOC_093686 | 295 coding  | noncoding | noncoding | noncoding |

|                 |                  |             |             |           |           |           |
|-----------------|------------------|-------------|-------------|-----------|-----------|-----------|
| MSTRG. 84297. 1 | DSP              | XLOC_093691 | 209 coding  | noncoding | noncoding | noncoding |
| MSTRG. 84313. 1 |                  | XLOC_093698 | 278 coding  | noncoding | noncoding | noncoding |
| MSTRG. 84378. 1 | LOC105374912     | XLOC_093705 | 280 coding  | noncoding | noncoding | noncoding |
| MSTRG. 84515. 1 |                  | XLOC_093726 | 288 coding  | noncoding | noncoding | noncoding |
| MSTRG. 84531. 1 |                  | XLOC_093732 | 256 coding  | noncoding | noncoding | noncoding |
| MSTRG. 84537. 1 |                  | XLOC_093736 | 280 coding  | noncoding | noncoding | noncoding |
| MSTRG. 84539. 1 |                  | XLOC_093737 | 266 coding  | noncoding | noncoding | noncoding |
| MSTRG. 84566. 1 | LOC112267856     | XLOC_093749 | 273 coding  | noncoding | noncoding | noncoding |
| MSTRG. 84615. 1 | OFCC1            | XLOC_093753 | 310 coding  | noncoding | noncoding | noncoding |
| MSTRG. 84623. 1 | LOC105374918     | XLOC_093757 | 245 coding  | noncoding | noncoding | noncoding |
| MSTRG. 84567. 1 |                  | XLOC_093760 | 423 coding  | noncoding | coding    | noncoding |
| NR_027793. 1    | LINC00518        | XLOC_093768 | 3018 coding | noncoding | noncoding | coding    |
| NM_004752. 3    | GCM2             | XLOC_093788 | 2365 coding | coding    | coding    | coding    |
| MSTRG. 84847. 1 | LOC105374925     | XLOC_093853 | 749 coding  | noncoding | noncoding | noncoding |
| MSTRG. 84719. 1 | LOC105374928     | XLOC_093875 | 286 coding  | noncoding | noncoding | noncoding |
| MSTRG. 84724. 1 |                  | XLOC_093879 | 302 coding  | noncoding | noncoding | noncoding |
| MSTRG. 84786. 1 |                  | XLOC_093923 | 362 coding  | noncoding | noncoding | noncoding |
| MSTRG. 84790. 1 |                  | XLOC_093924 | 278 coding  | noncoding | noncoding | noncoding |
| NR_149140. 1    | LINC02530        | XLOC_093928 | 1041 coding | noncoding | noncoding | noncoding |
| MSTRG. 84794. 1 |                  | XLOC_093929 | 264 coding  | noncoding | noncoding | noncoding |
| MSTRG. 84909. 1 | TBC1D7-LOC100130 | XLOC_093953 | 308 coding  | noncoding | noncoding | noncoding |
|                 | 357              |             |             |           |           |           |
| MSTRG. 84801. 1 |                  | XLOC_093955 | 288 coding  | noncoding | noncoding | noncoding |
| MSTRG. 84866. 1 |                  | XLOC_093967 | 212 coding  | noncoding | noncoding | noncoding |
| MSTRG. 84974. 1 |                  | XLOC_093971 | 225 coding  | noncoding | noncoding | noncoding |
| MSTRG. 84977. 1 | MCUR1            | XLOC_093973 | 273 coding  | noncoding | noncoding | noncoding |
| MSTRG. 84979. 1 |                  | XLOC_093977 | 225 coding  | noncoding | noncoding | noncoding |
| MSTRG. 84990. 7 | RNF182           | XLOC_093980 | 3608 coding | noncoding | coding    | coding    |
| MSTRG. 84996. 1 |                  | XLOC_093982 | 347 coding  | noncoding | noncoding | noncoding |
| MSTRG. 85124. 1 | LOC101928354     | XLOC_094036 | 270 coding  | noncoding | noncoding | noncoding |
| MSTRG. 85083. 1 | LOC105374945     | XLOC_094049 | 270 coding  | noncoding | noncoding | noncoding |
| MSTRG. 85059. 1 |                  | XLOC_094052 | 219 coding  | noncoding | noncoding | noncoding |
| MSTRG. 85060. 1 |                  | XLOC_094053 | 277 coding  | noncoding | noncoding | noncoding |
| MSTRG. 85063. 1 |                  | XLOC_094055 | 247 coding  | noncoding | noncoding | noncoding |
| MSTRG. 85070. 1 | LOC105374946     | XLOC_094059 | 242 coding  | noncoding | noncoding | noncoding |
| MSTRG. 85068. 1 |                  | XLOC_094061 | 236 coding  | noncoding | noncoding | noncoding |
| MSTRG. 85093. 1 |                  | XLOC_094062 | 290 coding  | noncoding | noncoding | noncoding |
| MSTRG. 85177. 1 |                  | XLOC_094085 | 237 coding  | noncoding | noncoding | noncoding |
| MSTRG. 85185. 1 |                  | XLOC_094093 | 345 coding  | noncoding | noncoding | noncoding |
| MSTRG. 85203. 1 |                  | XLOC_094172 | 248 coding  | noncoding | noncoding | noncoding |
| MSTRG. 85220. 1 |                  | XLOC_094187 | 503 coding  | noncoding | noncoding | noncoding |
| MSTRG. 85221. 1 |                  | XLOC_094188 | 264 coding  | noncoding | noncoding | noncoding |
| MSTRG. 85236. 1 |                  | XLOC_094195 | 202 coding  | noncoding | noncoding | noncoding |

|                  |              |             |             |           |           |           |
|------------------|--------------|-------------|-------------|-----------|-----------|-----------|
| MSTRG. 85237. 1  |              | XLOC_094196 | 216 coding  | noncoding | noncoding | noncoding |
| MSTRG. 85253. 1  | CAP2         | XLOC_094202 | 259 coding  | noncoding | noncoding | noncoding |
| MSTRG. 85256. 1  | CAP2         | XLOC_094204 | 229 coding  | noncoding | noncoding | noncoding |
| MSTRG. 85268. 1  |              | XLOC_094217 | 258 coding  | noncoding | noncoding | noncoding |
| MSTRG. 85310. 10 | KIF13A       | XLOC_094218 | 692 coding  | noncoding | noncoding | noncoding |
| MSTRG. 85322. 1  | KIF13A       | XLOC_094230 | 697 coding  | noncoding | noncoding | noncoding |
| MSTRG. 85278. 1  |              | XLOC_094234 | 251 coding  | noncoding | noncoding | noncoding |
| MSTRG. 85293. 1  |              | XLOC_094245 | 238 coding  | noncoding | noncoding | noncoding |
| MSTRG. 85338. 1  |              | XLOC_094263 | 283 coding  | noncoding | noncoding | noncoding |
| MSTRG. 85386. 1  |              | XLOC_094271 | 232 coding  | noncoding | noncoding | noncoding |
| MSTRG. 85408. 1  |              | XLOC_094277 | 642 coding  | coding    | noncoding | noncoding |
| MSTRG. 85411. 1  | LOC105374959 | XLOC_094279 | 261 coding  | noncoding | noncoding | noncoding |
| NM_001080480. 3  | MBOAT1       | XLOC_094284 | 4325 coding | coding    | coding    | coding    |
| MSTRG. 85565. 3  | E2F3         | XLOC_094305 | 597 coding  | coding    | noncoding | noncoding |
| MSTRG. 85808. 3  | CDKAL1       | XLOC_094309 | 1567 coding | coding    | noncoding | noncoding |
| MSTRG. 85607. 1  |              | XLOC_094331 | 205 coding  | noncoding | noncoding | noncoding |
| MSTRG. 85638. 1  | CASC15       | XLOC_094339 | 254 coding  | noncoding | noncoding | noncoding |
| MSTRG. 85656. 1  | CASC15       | XLOC_094352 | 294 coding  | noncoding | noncoding | noncoding |
| MSTRG. 85631. 1  |              | XLOC_094372 | 240 coding  | noncoding | noncoding | noncoding |
| MSTRG. 85676. 1  |              | XLOC_094376 | 241 coding  | noncoding | noncoding | noncoding |
| MSTRG. 85686. 1  |              | XLOC_094377 | 295 coding  | noncoding | noncoding | noncoding |
| MSTRG. 85689. 1  |              | XLOC_094378 | 293 coding  | noncoding | noncoding | noncoding |
| MSTRG. 85695. 1  |              | XLOC_094380 | 395 coding  | noncoding | noncoding | noncoding |
| MSTRG. 85696. 1  |              | XLOC_094383 | 234 coding  | coding    | noncoding | noncoding |
| MSTRG. 85697. 1  |              | XLOC_094384 | 285 coding  | noncoding | noncoding | noncoding |
| MSTRG. 85711. 1  |              | XLOC_094397 | 303 coding  | coding    | noncoding | noncoding |
| MSTRG. 85713. 1  |              | XLOC_094399 | 273 coding  | noncoding | noncoding | noncoding |
| MSTRG. 85715. 1  |              | XLOC_094401 | 278 coding  | noncoding | noncoding | noncoding |
| MSTRG. 85721. 1  |              | XLOC_094405 | 303 coding  | noncoding | noncoding | noncoding |
| XM_005249433. 4  | C6orf62      | XLOC_094428 | 1987 coding | coding    | coding    | coding    |
| MSTRG. 85886. 1  |              | XLOC_094477 | 205 coding  | noncoding | noncoding | noncoding |
| MSTRG. 85893. 1  | SCGN         | XLOC_094535 | 238 coding  | noncoding | noncoding | noncoding |
| MSTRG. 86299. 3  | BTN3A2       | XLOC_094609 | 3874 coding | coding    | noncoding | noncoding |
| MSTRG. 86138. 1  | BTN1A1       | XLOC_094612 | 304 coding  | noncoding | noncoding | noncoding |
| MSTRG. 86148. 3  | HMGN4        | XLOC_094616 | 2709 coding | coding    | noncoding | noncoding |
| MSTRG. 86186. 1  |              | XLOC_094657 | 321 coding  | coding    | noncoding | noncoding |
| MSTRG. 86190. 1  |              | XLOC_094661 | 312 coding  | noncoding | noncoding | noncoding |
| MSTRG. 86194. 1  |              | XLOC_094662 | 223 coding  | noncoding | noncoding | noncoding |
| MSTRG. 86197. 1  |              | XLOC_094663 | 280 coding  | noncoding | noncoding | noncoding |
| MSTRG. 86198. 1  |              | XLOC_094667 | 241 coding  | noncoding | noncoding | noncoding |
| MSTRG. 86264. 1  |              | XLOC_094695 | 249 coding  | noncoding | noncoding | noncoding |
| MSTRG. 86279. 1  |              | XLOC_094704 | 292 coding  | noncoding | noncoding | noncoding |
| MSTRG. 86350. 1  |              | XLOC_094743 | 254 coding  | coding    | noncoding | noncoding |

|                 |                 |             |              |           |           |           |
|-----------------|-----------------|-------------|--------------|-----------|-----------|-----------|
| MSTRG. 86442. 1 | ZBED9           | XLOC_094782 | 293 coding   | noncoding | noncoding | noncoding |
| NM_007243. 2    | NRM             | XLOC_094848 | 1755 coding  | noncoding | coding    | coding    |
| NR_037853. 1    | ATP6V1G2-DDX39B | XLOC_094879 | 2305 coding  | coding    | coding    | coding    |
| MSTRG. 86589. 3 | SNHG32          | XLOC_094905 | 485 coding   | coding    | noncoding | noncoding |
| XR_001744085. 1 | LOC107986589    | XLOC_094935 | 3380 coding  | noncoding | noncoding | noncoding |
| NM_006120. 4    | HLA-DMA         | XLOC_094948 | 1093 coding  | coding    | coding    | coding    |
| MSTRG. 86683. 1 | RPS18           | XLOC_094959 | 934 coding   | coding    | noncoding | noncoding |
| MSTRG. 86706. 1 |                 | XLOC_094975 | 273 coding   | noncoding | noncoding | noncoding |
| MSTRG. 86765. 1 | LEMD2           | XLOC_094989 | 223 coding   | noncoding | noncoding | noncoding |
| MSTRG. 86730. 1 |                 | XLOC_094997 | 244 coding   | noncoding | noncoding | noncoding |
| NM_000841. 4    | GRM4            | XLOC_095001 | 7368 coding  | coding    | coding    | coding    |
| MSTRG. 86735. 1 |                 | XLOC_095006 | 247 coding   | noncoding | noncoding | noncoding |
| MSTRG. 86745. 1 |                 | XLOC_095009 | 310 coding   | noncoding | noncoding | noncoding |
| MSTRG. 86793. 1 | RPS10-NUDT3     | XLOC_095020 | 254 coding   | noncoding | noncoding | noncoding |
| MSTRG. 86799. 1 | RPS10-NUDT3     | XLOC_095025 | 274 coding   | noncoding | noncoding | noncoding |
| MSTRG. 86781. 1 | PACSIN1         | XLOC_095028 | 245 coding   | noncoding | noncoding | noncoding |
| MSTRG. 86805. 1 |                 | XLOC_095044 | 351 coding   | noncoding | noncoding | noncoding |
| MSTRG. 86833. 1 |                 | XLOC_095068 | 299 coding   | noncoding | noncoding | noncoding |
| MSTRG. 86883. 1 | TEAD3           | XLOC_095096 | 237 coding   | noncoding | noncoding | noncoding |
| MSTRG. 86941. 5 | FKBP5           | XLOC_095101 | 814 coding   | coding    | coding    | noncoding |
| MSTRG. 86964. 1 | FKBP5           | XLOC_095122 | 299 coding   | noncoding | noncoding | noncoding |
| MSTRG. 86971. 1 | ARMC12          | XLOC_095125 | 321 coding   | noncoding | noncoding | noncoding |
| MSTRG. 86972. 1 |                 | XLOC_095127 | 244 coding   | noncoding | coding    | noncoding |
| MSTRG. 86984. 1 |                 | XLOC_095136 | 206 coding   | noncoding | noncoding | noncoding |
| MSTRG. 87057. 3 | BRPF3           | XLOC_095154 | 2396 coding  | coding    | coding    | coding    |
| XM_006714988. 4 | STK38           | XLOC_095168 | 3403 coding  | coding    | coding    | coding    |
| MSTRG. 87069. 5 | SRSF3           | XLOC_095169 | 5303 coding  | coding    | noncoding | noncoding |
| NR_144384. 1    | DINOL           | XLOC_095174 | 951 coding   | noncoding | noncoding | noncoding |
| MSTRG. 87118. 1 | C6orf89         | XLOC_095188 | 267 coding   | noncoding | noncoding | noncoding |
| MSTRG. 87123. 3 | C6orf89         | XLOC_095191 | 4060 coding  | noncoding | coding    | noncoding |
| MSTRG. 87132. 1 |                 | XLOC_095203 | 263 coding   | noncoding | noncoding | noncoding |
| MSTRG. 87359. 6 | ZFAND3          | XLOC_095232 | 3169 coding  | noncoding | noncoding | noncoding |
| MSTRG. 87498. 1 | BTBD9           | XLOC_095260 | 259 coding   | noncoding | noncoding | noncoding |
| MSTRG. 87501. 1 | BTBD9           | XLOC_095263 | 291 coding   | noncoding | noncoding | noncoding |
| MSTRG. 87503. 1 | BTBD9           | XLOC_095265 | 585 coding   | noncoding | noncoding | noncoding |
| MSTRG. 87230. 1 | DNAH8           | XLOC_095329 | 212 coding   | noncoding | noncoding | noncoding |
| NM_003740. 4    | KCNK5           | XLOC_095334 | 3783 coding  | coding    | coding    | coding    |
| MSTRG. 87199. 1 | KCNK5           | XLOC_095335 | 307 coding   | noncoding | noncoding | noncoding |
| NM_145027. 6    | KIF6            | XLOC_095343 | 9085 coding  | coding    | coding    | coding    |
| MSTRG. 87252. 1 | KIF6            | XLOC_095348 | 312 coding   | noncoding | noncoding | noncoding |
| MSTRG. 87273. 1 |                 | XLOC_095370 | 298 coding   | noncoding | noncoding | noncoding |
| MSTRG. 87304. 1 |                 | XLOC_095378 | 280 coding   | noncoding | noncoding | noncoding |
| XR_926281. 2    | LRFN2           | XLOC_095380 | 13980 coding | noncoding | coding    | coding    |

|                 |              |             |             |           |           |           |
|-----------------|--------------|-------------|-------------|-----------|-----------|-----------|
| MSTRG. 87322. 1 | LOC105375053 | XLOC_095393 | 217 coding  | coding    | noncoding | noncoding |
| MSTRG. 87705. 1 |              | XLOC_095425 | 227 coding  | noncoding | noncoding | noncoding |
| MSTRG. 87560. 1 |              | XLOC_095436 | 300 coding  | noncoding | noncoding | noncoding |
| MSTRG. 87580. 1 |              | XLOC_095454 | 301 coding  | noncoding | noncoding | noncoding |
| MSTRG. 87746. 2 | BYSL         | XLOC_095475 | 416 coding  | coding    | coding    | noncoding |
| MSTRG. 87762. 1 | CCND3        | XLOC_095489 | 585 coding  | noncoding | noncoding | noncoding |
| NM_001164446. 3 | C6orf132     | XLOC_095505 | 6385 coding | noncoding | coding    | coding    |
| XM_005249206. 3 | MRPS10       | XLOC_095508 | 2094 coding | coding    | noncoding | coding    |
| XM_011514725. 3 | MRPS10       | XLOC_095508 | 2142 coding | coding    | noncoding | coding    |
| NM_001008739. 2 | C6orf226     | XLOC_095549 | 557 coding  | noncoding | noncoding | noncoding |
| MSTRG. 87872. 1 | CNPY3-GNMT   | XLOC_095557 | 201 coding  | noncoding | noncoding | noncoding |
| MSTRG. 87878. 1 | PEX6         | XLOC_095560 | 240 coding  | noncoding | noncoding | noncoding |
| MSTRG. 87896. 1 | PTK7         | XLOC_095574 | 262 coding  | noncoding | noncoding | noncoding |
| MSTRG. 87900. 1 | PTK7         | XLOC_095578 | 313 coding  | noncoding | noncoding | noncoding |
| MSTRG. 87963. 1 | TJAP1        | XLOC_095605 | 452 coding  | noncoding | noncoding | noncoding |
| MSTRG. 87974. 1 |              | XLOC_095629 | 250 coding  | noncoding | noncoding | noncoding |
| MSTRG. 87992. 1 | LOC107986598 | XLOC_095633 | 281 coding  | noncoding | noncoding | noncoding |
| MSTRG. 88074. 1 |              | XLOC_095671 | 324 coding  | noncoding | noncoding | noncoding |
| MSTRG. 88081. 1 |              | XLOC_095677 | 290 coding  | noncoding | coding    | noncoding |
| MSTRG. 88181. 1 |              | XLOC_095767 | 255 coding  | noncoding | noncoding | noncoding |
| NM_153840. 4    | ADGRF1       | XLOC_095775 | 5432 coding | coding    | coding    | coding    |
| MSTRG. 88222. 1 |              | XLOC_095786 | 224 coding  | noncoding | noncoding | noncoding |
| XM_017010896. 1 | PTCHD4       | XLOC_095797 | 4671 coding | coding    | coding    | coding    |
| MSTRG. 88283. 1 | PTCHD4       | XLOC_095802 | 312 coding  | noncoding | noncoding | noncoding |
| MSTRG. 88258. 1 |              | XLOC_095807 | 213 coding  | noncoding | noncoding | noncoding |
| MSTRG. 88288. 1 |              | XLOC_095809 | 476 coding  | coding    | noncoding | noncoding |
| MSTRG. 88307. 1 |              | XLOC_095815 | 293 coding  | noncoding | noncoding | noncoding |
| MSTRG. 88349. 1 |              | XLOC_095837 | 288 coding  | noncoding | noncoding | noncoding |
| MSTRG. 88379. 1 |              | XLOC_095855 | 200 coding  | noncoding | noncoding | noncoding |
| MSTRG. 88396. 1 |              | XLOC_095863 | 269 coding  | noncoding | noncoding | noncoding |
| MSTRG. 88403. 1 |              | XLOC_095867 | 260 coding  | noncoding | noncoding | noncoding |
| XM_011514535. 3 | GSTA4        | XLOC_095936 | 1376 coding | coding    | coding    | coding    |
| MSTRG. 88564. 1 | GCM1         | XLOC_095949 | 262 coding  | noncoding | noncoding | noncoding |
| MSTRG. 88566. 1 | GCM1         | XLOC_095950 | 258 coding  | noncoding | noncoding | noncoding |
| MSTRG. 88576. 1 | GCM1         | XLOC_095953 | 238 coding  | noncoding | noncoding | noncoding |
| XM_017010749. 1 | GCLC         | XLOC_095971 | 3262 coding | coding    | coding    | coding    |
| MSTRG. 88556. 1 |              | XLOC_095978 | 450 coding  | coding    | noncoding | noncoding |
| XR_001744176. 2 | LOC107986606 | XLOC_096020 | 3220 coding | coding    | noncoding | noncoding |
| MSTRG. 88678. 1 | LOC107986606 | XLOC_096022 | 382 coding  | noncoding | noncoding | noncoding |
| MSTRG. 88687. 1 | FAM83B       | XLOC_096028 | 223 coding  | noncoding | noncoding | noncoding |
| MSTRG. 88681. 1 |              | XLOC_096030 | 254 coding  | noncoding | noncoding | noncoding |
| MSTRG. 88683. 1 |              | XLOC_096031 | 210 coding  | noncoding | noncoding | noncoding |
| XM_011514817. 3 | BMP5         | XLOC_096043 | 7603 coding | coding    | coding    | coding    |

|                  |                  |             |             |           |           |           |
|------------------|------------------|-------------|-------------|-----------|-----------|-----------|
| MSTRG. 88962. 1  | DST              | XLOC_096066 | 369 coding  | noncoding | noncoding | noncoding |
| MSTRG. 88870. 1  |                  | XLOC_096098 | 272 coding  | noncoding | noncoding | noncoding |
| MSTRG. 88923. 1  | LINC00680-GUSBP4 | XLOC_096106 | 291 coding  | noncoding | noncoding | noncoding |
| MSTRG. 88941. 1  |                  | XLOC_096122 | 313 coding  | noncoding | noncoding | noncoding |
| MSTRG. 88947. 1  |                  | XLOC_096125 | 294 coding  | noncoding | noncoding | noncoding |
| MSTRG. 89051. 1  |                  | XLOC_096154 | 201 coding  | noncoding | noncoding | noncoding |
| MSTRG. 89044. 1  |                  | XLOC_096164 | 316 coding  | noncoding | noncoding | noncoding |
| MSTRG. 89059. 1  |                  | XLOC_096165 | 251 coding  | coding    | noncoding | noncoding |
| MSTRG. 89063. 1  |                  | XLOC_096167 | 276 coding  | noncoding | noncoding | noncoding |
| MSTRG. 89065. 1  |                  | XLOC_096169 | 313 coding  | noncoding | noncoding | noncoding |
| MSTRG. 89211. 1  |                  | XLOC_096211 | 263 coding  | noncoding | noncoding | noncoding |
| MSTRG. 89215. 1  | LOC107986540     | XLOC_096212 | 270 coding  | noncoding | noncoding | noncoding |
| MSTRG. 89216. 1  |                  | XLOC_096214 | 259 coding  | noncoding | noncoding | noncoding |
| MSTRG. 89225. 1  |                  | XLOC_096221 | 282 coding  | coding    | noncoding | noncoding |
| MSTRG. 89290. 1  | ADGRB3           | XLOC_096251 | 291 coding  | noncoding | noncoding | noncoding |
| MSTRG. 89248. 1  |                  | XLOC_096258 | 282 coding  | noncoding | noncoding | noncoding |
| MSTRG. 89420. 3  | FAM135A          | XLOC_096310 | 2360 coding | coding    | noncoding | coding    |
| MSTRG. 89487. 1  |                  | XLOC_096326 | 292 coding  | noncoding | noncoding | noncoding |
| MSTRG. 89561. 1  | RIMS1            | XLOC_096354 | 327 coding  | coding    | noncoding | noncoding |
| MSTRG. 89562. 1  | RIMS1            | XLOC_096355 | 270 coding  | noncoding | noncoding | noncoding |
| XR_002956358. 1  | LOC112267961     | XLOC_096396 | 2276 coding | noncoding | coding    | noncoding |
| MSTRG. 89593. 1  | KHDC1            | XLOC_096404 | 271 coding  | noncoding | noncoding | noncoding |
| MSTRG. 89578. 1  | KHDC3L           | XLOC_096407 | 323 coding  | coding    | noncoding | noncoding |
| MSTRG. 89603. 1  |                  | XLOC_096412 | 317 coding  | noncoding | noncoding | noncoding |
| MSTRG. 89607. 1  | CGAS             | XLOC_096414 | 230 coding  | noncoding | noncoding | noncoding |
| MSTRG. 89610. 3  | EEF1A1           | XLOC_096416 | 2303 coding | coding    | coding    | coding    |
| MSTRG. 89617. 1  | SLC17A5          | XLOC_096421 | 282 coding  | noncoding | noncoding | noncoding |
| MSTRG. 89664. 1  | LOC101928516     | XLOC_096440 | 336 coding  | noncoding | noncoding | noncoding |
| MSTRG. 89630. 1  |                  | XLOC_096449 | 582 coding  | coding    | noncoding | noncoding |
| MSTRG. 89683. 1  |                  | XLOC_096451 | 278 coding  | noncoding | noncoding | noncoding |
| NM_001289987. 3  | FILIP1           | XLOC_096468 | 4802 coding | coding    | coding    | coding    |
| MSTRG. 89719. 1  | LOC101928540     | XLOC_096476 | 259 coding  | noncoding | noncoding | noncoding |
| MSTRG. 89687. 1  |                  | XLOC_096480 | 217 coding  | noncoding | noncoding | noncoding |
| MSTRG. 89779. 14 | SENP6            | XLOC_096483 | 3219 coding | coding    | noncoding | noncoding |
| MSTRG. 89730. 1  |                  | XLOC_096485 | 246 coding  | noncoding | noncoding | noncoding |
| MSTRG. 89749. 1  |                  | XLOC_096500 | 254 coding  | noncoding | coding    | noncoding |
| MSTRG. 89754. 1  | LINC02540        | XLOC_096502 | 211 coding  | noncoding | noncoding | noncoding |
| MSTRG. 89764. 1  | LOC105377861     | XLOC_096507 | 235 coding  | noncoding | noncoding | noncoding |
| MSTRG. 89765. 1  | LOC105377861     | XLOC_096508 | 255 coding  | noncoding | noncoding | noncoding |
| MSTRG. 89853. 1  | LOC105377862     | XLOC_096511 | 292 coding  | noncoding | noncoding | noncoding |
| MSTRG. 89854. 1  | LOC105377862     | XLOC_096512 | 282 coding  | noncoding | noncoding | noncoding |
| MSTRG. 89865. 1  | LOC105377862     | XLOC_096516 | 328 coding  | noncoding | noncoding | noncoding |
| NM_000863. 2     | HTR1B            | XLOC_096524 | 3175 coding | coding    | coding    | coding    |

|                 |              |             |              |           |           |           |
|-----------------|--------------|-------------|--------------|-----------|-----------|-----------|
| MSTRG. 89821. 1 | MEI4         | XLOC_096527 | 258 coding   | noncoding | noncoding | noncoding |
| MSTRG. 89825. 1 | MEI4         | XLOC_096528 | 279 coding   | coding    | noncoding | noncoding |
| MSTRG. 89827. 1 | MEI4         | XLOC_096529 | 264 coding   | coding    | coding    | noncoding |
| MSTRG. 89834. 1 | MEI4         | XLOC_096533 | 265 coding   | coding    | noncoding | noncoding |
| MSTRG. 89840. 1 | LOC105377865 | XLOC_096536 | 259 coding   | noncoding | noncoding | noncoding |
| MSTRG. 89842. 1 | LOC105377865 | XLOC_096537 | 343 coding   | noncoding | noncoding | noncoding |
| MSTRG. 89893. 1 |              | XLOC_096546 | 270 coding   | noncoding | noncoding | noncoding |
| MSTRG. 89975. 1 | LOC107986613 | XLOC_096550 | 266 coding   | coding    | noncoding | noncoding |
| MSTRG. 89981. 1 | IRAK1BP1     | XLOC_096554 | 337 coding   | noncoding | noncoding | noncoding |
| MSTRG. 89914. 1 |              | XLOC_096602 | 271 coding   | noncoding | noncoding | noncoding |
| MSTRG. 89934. 1 |              | XLOC_096614 | 231 coding   | noncoding | noncoding | noncoding |
| MSTRG. 89951. 1 |              | XLOC_096621 | 277 coding   | noncoding | noncoding | noncoding |
| MSTRG. 89964. 1 |              | XLOC_096624 | 219 coding   | noncoding | noncoding | noncoding |
| MSTRG. 90047. 1 |              | XLOC_096687 | 277 coding   | noncoding | noncoding | noncoding |
| MSTRG. 90049. 1 |              | XLOC_096688 | 228 coding   | noncoding | noncoding | noncoding |
| XR_001744224. 1 | LOC105377872 | XLOC_096700 | 12153 coding | noncoding | noncoding | noncoding |
| MSTRG. 90091. 1 | LINC02542    | XLOC_096709 | 660 coding   | coding    | noncoding | noncoding |
| MSTRG. 90103. 1 | LOC107986617 | XLOC_096713 | 247 coding   | noncoding | noncoding | noncoding |
| MSTRG. 90173. 1 |              | XLOC_096719 | 476 coding   | noncoding | noncoding | noncoding |
| MSTRG. 90402. 1 | ME1          | XLOC_096737 | 224 coding   | noncoding | noncoding | noncoding |
| MSTRG. 90372. 1 |              | XLOC_096739 | 644 coding   | noncoding | noncoding | noncoding |
| MSTRG. 90413. 1 | SNAP91       | XLOC_096744 | 315 coding   | noncoding | noncoding | noncoding |
| MSTRG. 90409. 1 |              | XLOC_096748 | 315 coding   | noncoding | noncoding | noncoding |
| MSTRG. 90411. 1 |              | XLOC_096749 | 259 coding   | noncoding | noncoding | noncoding |
| MSTRG. 90542. 1 | MRAP2        | XLOC_096767 | 248 coding   | noncoding | noncoding | noncoding |
| MSTRG. 90437. 1 |              | XLOC_096772 | 264 coding   | noncoding | noncoding | noncoding |
| MSTRG. 90531. 1 |              | XLOC_096792 | 220 coding   | noncoding | noncoding | noncoding |
| MSTRG. 90532. 1 |              | XLOC_096793 | 235 coding   | noncoding | noncoding | noncoding |
| NM_001350553. 1 | SNX14        | XLOC_096796 | 3464 coding  | coding    | coding    | coding    |
| NR_146777. 1    | SNX14        | XLOC_096796 | 4000 coding  | coding    | coding    | coding    |
| MSTRG. 90629. 1 | SNX14        | XLOC_096807 | 481 coding   | noncoding | coding    | noncoding |
| NM_001159676. 1 | SYNCRIP      | XLOC_096814 | 6796 coding  | coding    | coding    | coding    |
| MSTRG. 90559. 1 | LOC107986622 | XLOC_096824 | 277 coding   | noncoding | noncoding | noncoding |
| MSTRG. 90568. 1 |              | XLOC_096830 | 290 coding   | noncoding | noncoding | noncoding |
| MSTRG. 90574. 1 | LOC101928842 | XLOC_096832 | 238 coding   | noncoding | noncoding | noncoding |
| MSTRG. 90579. 1 |              | XLOC_096834 | 296 coding   | noncoding | noncoding | noncoding |
| MSTRG. 90584. 1 |              | XLOC_096836 | 286 coding   | noncoding | noncoding | noncoding |
| MSTRG. 90596. 1 |              | XLOC_096839 | 432 coding   | noncoding | coding    | noncoding |
| MSTRG. 90720. 1 | CFAP206      | XLOC_096880 | 243 coding   | noncoding | noncoding | noncoding |
| MSTRG. 90790. 2 | ORC3         | XLOC_096896 | 2553 coding  | coding    | noncoding | noncoding |
| MSTRG. 90727. 1 | SPACA1       | XLOC_096911 | 234 coding   | noncoding | noncoding | noncoding |
| MSTRG. 90890. 1 | RNGTT        | XLOC_096942 | 241 coding   | noncoding | noncoding | noncoding |
| MSTRG. 90909. 1 | RNGTT        | XLOC_096960 | 225 coding   | noncoding | noncoding | noncoding |

|                 |              |             |             |           |           |           |
|-----------------|--------------|-------------|-------------|-----------|-----------|-----------|
| MSTRG. 90833. 1 | PM20D2       | XLOC_096977 | 320 coding  | noncoding | noncoding | noncoding |
| MSTRG. 90837. 1 | PM20D2       | XLOC_096981 | 327 coding  | noncoding | noncoding | noncoding |
| NM_145332. 3    | MAP3K7       | XLOC_097123 | 4816 coding | coding    | coding    | coding    |
| MSTRG. 91031. 1 |              | XLOC_097146 | 270 coding  | noncoding | noncoding | noncoding |
| MSTRG. 91037. 1 |              | XLOC_097152 | 293 coding  | noncoding | noncoding | noncoding |
| MSTRG. 91029. 1 |              | XLOC_097155 | 603 coding  | noncoding | noncoding | noncoding |
| MSTRG. 91236. 1 |              | XLOC_097209 | 203 coding  | noncoding | noncoding | noncoding |
| MSTRG. 91237. 1 |              | XLOC_097210 | 223 coding  | noncoding | noncoding | noncoding |
| MSTRG. 91321. 1 | UFL1-AS1     | XLOC_097238 | 278 coding  | coding    | noncoding | noncoding |
| MSTRG. 91327. 1 | UFL1-AS1     | XLOC_097240 | 207 coding  | coding    | noncoding | noncoding |
| MSTRG. 91297. 1 |              | XLOC_097245 | 274 coding  | coding    | noncoding | noncoding |
| XR_942376. 1    | MMS22L       | XLOC_097285 | 8456 coding | coding    | coding    | coding    |
| MSTRG. 91359. 1 | LOC101927314 | XLOC_097298 | 245 coding  | noncoding | noncoding | noncoding |
| MSTRG. 91364. 1 | LOC101927314 | XLOC_097301 | 310 coding  | coding    | noncoding | noncoding |
| MSTRG. 91377. 1 |              | XLOC_097313 | 258 coding  | noncoding | noncoding | noncoding |
| NM_001322406. 2 | PNISR        | XLOC_097339 | 5225 coding | coding    | coding    | coding    |
| MSTRG. 91821. 1 | LOC107984041 | XLOC_097442 | 265 coding  | noncoding | noncoding | noncoding |
| MSTRG. 91632. 1 | GRIK2        | XLOC_097454 | 351 coding  | noncoding | noncoding | noncoding |
| MSTRG. 91612. 1 |              | XLOC_097459 | 265 coding  | noncoding | noncoding | noncoding |
| MSTRG. 91637. 1 |              | XLOC_097466 | 309 coding  | noncoding | noncoding | noncoding |
| MSTRG. 91642. 1 |              | XLOC_097469 | 635 coding  | noncoding | coding    | noncoding |
| MSTRG. 91670. 1 |              | XLOC_097486 | 221 coding  | noncoding | noncoding | noncoding |
| MSTRG. 91677. 1 |              | XLOC_097491 | 225 coding  | noncoding | noncoding | noncoding |
| MSTRG. 91850. 1 | HACE1        | XLOC_097509 | 272 coding  | noncoding | noncoding | noncoding |
| MSTRG. 91853. 1 | HACE1        | XLOC_097512 | 239 coding  | noncoding | noncoding | noncoding |
| MSTRG. 91753. 1 | LIN28B       | XLOC_097515 | 222 coding  | noncoding | noncoding | noncoding |
| MSTRG. 91857. 1 |              | XLOC_097537 | 318 coding  | noncoding | noncoding | noncoding |
| MSTRG. 91919. 1 | LOC105377923 | XLOC_097550 | 220 coding  | noncoding | noncoding | noncoding |
| MSTRG. 91927. 1 | LOC105377923 | XLOC_097553 | 215 coding  | noncoding | noncoding | noncoding |
| MSTRG. 91945. 1 | PRDM1        | XLOC_097563 | 304 coding  | noncoding | noncoding | noncoding |
| MSTRG. 91942. 1 |              | XLOC_097567 | 320 coding  | noncoding | noncoding | noncoding |
| MSTRG. 92010. 1 | CRYBG1       | XLOC_097587 | 294 coding  | noncoding | noncoding | noncoding |
| MSTRG. 92019. 1 | CRYBG1       | XLOC_097592 | 267 coding  | noncoding | noncoding | noncoding |
| MSTRG. 91998. 1 |              | XLOC_097606 | 399 coding  | noncoding | noncoding | noncoding |
| MSTRG. 91999. 1 |              | XLOC_097607 | 276 coding  | noncoding | noncoding | noncoding |
| MSTRG. 92121. 1 |              | XLOC_097614 | 247 coding  | noncoding | noncoding | noncoding |
| MSTRG. 92127. 1 | PDSS2        | XLOC_097617 | 277 coding  | noncoding | noncoding | noncoding |
| MSTRG. 92129. 1 | PDSS2        | XLOC_097619 | 219 coding  | noncoding | noncoding | noncoding |
| MSTRG. 92087. 1 | OSTM1-AS1    | XLOC_097667 | 236 coding  | noncoding | noncoding | noncoding |
| MSTRG. 92090. 1 | NR2E1        | XLOC_097668 | 536 coding  | noncoding | coding    | noncoding |
| MSTRG. 92173. 1 | AFG1L        | XLOC_097678 | 302 coding  | noncoding | noncoding | noncoding |
| MSTRG. 92335. 1 | SESN1        | XLOC_097745 | 218 coding  | noncoding | noncoding | noncoding |
| MSTRG. 92348. 1 | CCDC162P     | XLOC_097757 | 236 coding  | noncoding | noncoding | noncoding |

|                 |              |             |              |           |           |           |
|-----------------|--------------|-------------|--------------|-----------|-----------|-----------|
| NM_022765. 4    | MICAL1       | XLOC_097774 | 3430 coding  | coding    | coding    | coding    |
| MSTRG. 92458. 1 | AK9          | XLOC_097782 | 276 coding   | noncoding | noncoding | noncoding |
| MSTRG. 92288. 1 |              | XLOC_097833 | 248 coding   | noncoding | noncoding | noncoding |
| MSTRG. 92508. 1 | CDK19        | XLOC_097841 | 275 coding   | noncoding | noncoding | noncoding |
| MSTRG. 92532. 1 | CDK19        | XLOC_097864 | 264 coding   | noncoding | noncoding | noncoding |
| XR_001743550. 2 | REV3L        | XLOC_097890 | 10562 coding | coding    | coding    | coding    |
| MSTRG. 92564. 1 |              | XLOC_097962 | 314 coding   | coding    | noncoding | coding    |
| MSTRG. 92619. 1 |              | XLOC_097987 | 216 coding   | noncoding | noncoding | noncoding |
| MSTRG. 92627. 1 |              | XLOC_097992 | 275 coding   | noncoding | noncoding | noncoding |
| MSTRG. 92645. 1 |              | XLOC_097998 | 336 coding   | noncoding | noncoding | noncoding |
| MSTRG. 92714. 1 | HDAC2-AS2    | XLOC_098016 | 270 coding   | noncoding | noncoding | noncoding |
| MSTRG. 92667. 1 | LOC105377959 | XLOC_098022 | 242 coding   | noncoding | noncoding | noncoding |
| MSTRG. 92670. 1 |              | XLOC_098025 | 224 coding   | noncoding | noncoding | noncoding |
| MSTRG. 92675. 1 |              | XLOC_098028 | 293 coding   | coding    | noncoding | noncoding |
| MSTRG. 92679. 1 |              | XLOC_098031 | 301 coding   | noncoding | noncoding | noncoding |
| MSTRG. 92683. 1 |              | XLOC_098034 | 346 coding   | coding    | noncoding | noncoding |
| MSTRG. 92728. 1 |              | XLOC_098041 | 307 coding   | noncoding | noncoding | noncoding |
| MSTRG. 92723. 1 |              | XLOC_098042 | 244 coding   | coding    | noncoding | noncoding |
| MSTRG. 92732. 1 |              | XLOC_098044 | 464 coding   | noncoding | coding    | noncoding |
| MSTRG. 92735. 1 |              | XLOC_098045 | 288 coding   | noncoding | noncoding | noncoding |
| MSTRG. 92781. 2 | CALHM6       | XLOC_098094 | 586 coding   | coding    | coding    | noncoding |
| MSTRG. 92827. 1 | RFX6         | XLOC_098123 | 286 coding   | noncoding | noncoding | noncoding |
| MSTRG. 92945. 1 |              | XLOC_098170 | 313 coding   | noncoding | noncoding | noncoding |
| MSTRG. 93102. 1 |              | XLOC_098182 | 373 coding   | noncoding | noncoding | noncoding |
| MSTRG. 93169. 1 | LOC107986524 | XLOC_098205 | 243 coding   | noncoding | noncoding | noncoding |
| MSTRG. 93218. 1 | MCM9         | XLOC_098234 | 246 coding   | noncoding | noncoding | noncoding |
| MSTRG. 93219. 1 | MCM9         | XLOC_098235 | 264 coding   | noncoding | noncoding | noncoding |
| MSTRG. 93229. 1 |              | XLOC_098244 | 316 coding   | noncoding | noncoding | noncoding |
| XM_005266986. 4 | MAN1A1       | XLOC_098262 | 4880 coding  | coding    | coding    | coding    |
| MSTRG. 93241. 1 |              | XLOC_098297 | 222 coding   | noncoding | noncoding | noncoding |
| MSTRG. 93243. 1 |              | XLOC_098299 | 422 coding   | noncoding | noncoding | noncoding |
| MSTRG. 93255. 1 |              | XLOC_098306 | 270 coding   | noncoding | noncoding | noncoding |
| MSTRG. 93264. 1 |              | XLOC_098310 | 263 coding   | noncoding | noncoding | noncoding |
| MSTRG. 93265. 1 |              | XLOC_098311 | 227 coding   | noncoding | noncoding | noncoding |
| MSTRG. 93435. 1 | TBC1D32      | XLOC_098332 | 273 coding   | noncoding | noncoding | noncoding |
| MSTRG. 93284. 1 |              | XLOC_098335 | 222 coding   | noncoding | noncoding | noncoding |
| MSTRG. 93287. 1 |              | XLOC_098337 | 254 coding   | noncoding | noncoding | noncoding |
| MSTRG. 93321. 1 | LOC105377979 | XLOC_098350 | 230 coding   | coding    | noncoding | noncoding |
| MSTRG. 93326. 1 | LOC105377979 | XLOC_098353 | 301 coding   | noncoding | noncoding | noncoding |
| MSTRG. 93304. 1 |              | XLOC_098354 | 291 coding   | noncoding | noncoding | noncoding |
| MSTRG. 93307. 1 |              | XLOC_098355 | 255 coding   | noncoding | noncoding | noncoding |
| MSTRG. 93309. 1 |              | XLOC_098357 | 308 coding   | noncoding | noncoding | noncoding |
| MSTRG. 93312. 1 |              | XLOC_098358 | 293 coding   | noncoding | noncoding | noncoding |

|                 |              |             |             |           |           |           |
|-----------------|--------------|-------------|-------------|-----------|-----------|-----------|
| MSTRG. 93333. 1 |              | XLOC_098391 | 285 coding  | noncoding | noncoding | noncoding |
| MSTRG. 93337. 1 |              | XLOC_098393 | 274 coding  | noncoding | noncoding | noncoding |
| MSTRG. 93340. 1 |              | XLOC_098395 | 284 coding  | noncoding | noncoding | noncoding |
| MSTRG. 93351. 1 |              | XLOC_098399 | 248 coding  | noncoding | noncoding | noncoding |
| MSTRG. 93503. 1 | NKAIN2       | XLOC_098416 | 249 coding  | noncoding | noncoding | noncoding |
| MSTRG. 93514. 1 | NKAIN2       | XLOC_098425 | 237 coding  | coding    | noncoding | noncoding |
| MSTRG. 93523. 1 | NKAIN2       | XLOC_098432 | 206 coding  | noncoding | noncoding | noncoding |
| MSTRG. 93558. 1 | TPD52L1      | XLOC_098471 | 256 coding  | noncoding | noncoding | noncoding |
| MSTRG. 93561. 1 |              | XLOC_098478 | 248 coding  | noncoding | noncoding | noncoding |
| MSTRG. 93693. 1 |              | XLOC_098590 | 297 coding  | noncoding | noncoding | noncoding |
| XR_002956389. 1 | LOC105377989 | XLOC_098591 | 7422 coding | noncoding | noncoding | noncoding |
| MSTRG. 93697. 1 |              | XLOC_098593 | 283 coding  | noncoding | noncoding | noncoding |
| MSTRG. 93710. 1 |              | XLOC_098598 | 257 coding  | noncoding | noncoding | noncoding |
| MSTRG. 93900. 1 | PTPRK        | XLOC_098644 | 237 coding  | noncoding | noncoding | noncoding |
| MSTRG. 93942. 1 | LAMA2        | XLOC_098653 | 244 coding  | noncoding | noncoding | noncoding |
| MSTRG. 93945. 1 | LAMA2        | XLOC_098655 | 293 coding  | noncoding | noncoding | noncoding |
| MSTRG. 93961. 1 | LAMA2        | XLOC_098666 | 359 coding  | coding    | noncoding | noncoding |
| MSTRG. 93964. 1 | LAMA2        | XLOC_098668 | 561 coding  | noncoding | noncoding | noncoding |
| MSTRG. 94003. 1 | ARHGAP18     | XLOC_098680 | 322 coding  | noncoding | noncoding | noncoding |
| NM_001017373. 4 | SAMD3        | XLOC_098695 | 2093 coding | coding    | coding    | coding    |
| MSTRG. 94018. 1 |              | XLOC_098742 | 242 coding  | noncoding | noncoding | noncoding |
| MSTRG. 94057. 1 | LOC107986643 | XLOC_098758 | 3400 coding | coding    | noncoding | noncoding |
| MSTRG. 94100. 1 | ENPP1        | XLOC_098796 | 282 coding  | noncoding | noncoding | noncoding |
| MSTRG. 94106. 1 |              | XLOC_098800 | 291 coding  | noncoding | noncoding | noncoding |
| NM_138327. 2    | TAAR1        | XLOC_098841 | 1129 coding | coding    | coding    | coding    |
| MSTRG. 94307. 1 | SLC18B1      | XLOC_098861 | 237 coding  | noncoding | noncoding | noncoding |
| MSTRG. 94311. 1 | LOC105378008 | XLOC_098868 | 294 coding  | noncoding | noncoding | noncoding |
| MSTRG. 94360. 1 | TARID        | XLOC_098881 | 252 coding  | noncoding | noncoding | noncoding |
| MSTRG. 94370. 1 |              | XLOC_098888 | 264 coding  | noncoding | noncoding | noncoding |
| MSTRG. 94385. 1 |              | XLOC_098898 | 265 coding  | noncoding | noncoding | noncoding |
| MSTRG. 94404. 1 |              | XLOC_098902 | 411 coding  | noncoding | noncoding | noncoding |
| NR_125852. 1    | CT69         | XLOC_098903 | 1188 coding | noncoding | noncoding | noncoding |
| MSTRG. 94426. 1 | LOC101928277 | XLOC_098914 | 239 coding  | noncoding | noncoding | noncoding |
| MSTRG. 94489. 1 | HBS1L        | XLOC_098939 | 319 coding  | noncoding | noncoding | noncoding |
| MSTRG. 94458. 1 | LOC105378010 | XLOC_098943 | 274 coding  | noncoding | noncoding | noncoding |
| MSTRG. 94491. 2 | LOC105378011 | XLOC_098945 | 451 coding  | coding    | noncoding | noncoding |
| MSTRG. 94462. 1 |              | XLOC_098946 | 264 coding  | noncoding | noncoding | noncoding |
| MSTRG. 94536. 1 | LINC00271    | XLOC_098958 | 289 coding  | noncoding | noncoding | noncoding |
| XR_001743770. 2 | BCLAF1       | XLOC_099017 | 5470 coding | coding    | coding    | coding    |
| XR_001743771. 1 | BCLAF1       | XLOC_099017 | 6152 coding | coding    | coding    | coding    |
| MSTRG. 94540. 1 |              | XLOC_099023 | 318 coding  | noncoding | noncoding | noncoding |
| MSTRG. 94547. 1 |              | XLOC_099025 | 231 coding  | noncoding | noncoding | noncoding |
| MSTRG. 94770. 1 | MAP7         | XLOC_099028 | 261 coding  | noncoding | noncoding | noncoding |

|                 |              |             |             |           |           |           |
|-----------------|--------------|-------------|-------------|-----------|-----------|-----------|
| MSTRG. 94774. 1 | MAP7         | XLOC_099029 | 298 coding  | coding    | noncoding | noncoding |
| MSTRG. 94805. 1 | MAP3K5       | XLOC_099051 | 274 coding  | noncoding | noncoding | noncoding |
| MSTRG. 94807. 1 | MAP3K5       | XLOC_099053 | 296 coding  | noncoding | noncoding | noncoding |
| MSTRG. 94631. 1 |              | XLOC_099096 | 265 coding  | coding    | noncoding | noncoding |
| MSTRG. 94636. 1 | IL22RA2      | XLOC_099100 | 298 coding  | coding    | noncoding | noncoding |
| MSTRG. 94691. 1 | LOC102723649 | XLOC_099116 | 310 coding  | noncoding | noncoding | noncoding |
| MSTRG. 94713. 1 | LOC105378021 | XLOC_099134 | 225 coding  | noncoding | noncoding | noncoding |
| MSTRG. 94722. 1 |              | XLOC_099139 | 273 coding  | noncoding | noncoding | noncoding |
| MSTRG. 94851. 1 | NHSL1        | XLOC_099152 | 271 coding  | noncoding | noncoding | noncoding |
| MSTRG. 94855. 1 | NHSL1        | XLOC_099155 | 308 coding  | noncoding | noncoding | noncoding |
| MSTRG. 94859. 1 | NHSL1        | XLOC_099157 | 244 coding  | noncoding | noncoding | noncoding |
| MSTRG. 94820. 1 |              | XLOC_099159 | 282 coding  | coding    | coding    | noncoding |
| NR_161203. 1    | GVQW2        | XLOC_099160 | 2732 coding | noncoding | noncoding | noncoding |
| MSTRG. 94884. 1 | ECT2L        | XLOC_099169 | 284 coding  | noncoding | noncoding | noncoding |
| MSTRG. 94887. 1 | ECT2L        | XLOC_099171 | 272 coding  | noncoding | noncoding | noncoding |
| MSTRG. 94870. 1 |              | XLOC_099188 | 213 coding  | noncoding | noncoding | noncoding |
| MSTRG. 94941. 1 | TXLNB        | XLOC_099197 | 218 coding  | noncoding | noncoding | noncoding |
| MSTRG. 94922. 1 | LOC105378024 | XLOC_099213 | 300 coding  | noncoding | noncoding | noncoding |
| MSTRG. 94929. 1 |              | XLOC_099217 | 379 coding  | noncoding | noncoding | noncoding |
| MSTRG. 94967. 1 |              | XLOC_099223 | 300 coding  | noncoding | noncoding | noncoding |
| MSTRG. 94972. 1 | FILNC1       | XLOC_099224 | 262 coding  | noncoding | noncoding | noncoding |
| MSTRG. 94991. 1 |              | XLOC_099236 | 268 coding  | coding    | noncoding | noncoding |
| MSTRG. 94992. 1 |              | XLOC_099237 | 248 coding  | coding    | noncoding | noncoding |
| MSTRG. 94995. 1 |              | XLOC_099238 | 262 coding  | noncoding | noncoding | noncoding |
| MSTRG. 95023. 1 | LOC105378027 | XLOC_099246 | 263 coding  | noncoding | noncoding | noncoding |
| MSTRG. 95002. 1 | LOC102723724 | XLOC_099248 | 360 coding  | noncoding | noncoding | noncoding |
| MSTRG. 95009. 1 |              | XLOC_099251 | 535 coding  | noncoding | coding    | noncoding |
| MSTRG. 95026. 1 |              | XLOC_099255 | 306 coding  | noncoding | noncoding | noncoding |
| MSTRG. 95082. 1 | LOC105378031 | XLOC_099271 | 304 coding  | noncoding | noncoding | noncoding |
| MSTRG. 95092. 1 | LOC105378031 | XLOC_099272 | 267 coding  | noncoding | noncoding | noncoding |
| MSTRG. 95077. 1 | NMBR         | XLOC_099274 | 267 coding  | noncoding | noncoding | noncoding |
| MSTRG. 95093. 1 |              | XLOC_099278 | 294 coding  | noncoding | noncoding | noncoding |
| MSTRG. 95118. 1 | LOC153910    | XLOC_099290 | 659 coding  | noncoding | noncoding | noncoding |
| MSTRG. 95281. 2 | LTV1         | XLOC_099397 | 1652 coding | coding    | noncoding | noncoding |
| MSTRG. 95291. 6 | STX11        | XLOC_099421 | 1807 coding | coding    | coding    | noncoding |
| MSTRG. 95349. 1 |              | XLOC_099432 | 243 coding  | noncoding | noncoding | noncoding |
| MSTRG. 95351. 1 |              | XLOC_099433 | 278 coding  | coding    | noncoding | noncoding |
| MSTRG. 95355. 1 |              | XLOC_099436 | 380 coding  | noncoding | noncoding | noncoding |
| MSTRG. 95372. 1 |              | XLOC_099445 | 256 coding  | noncoding | noncoding | noncoding |
| MSTRG. 95583. 1 | EPM2A        | XLOC_099449 | 424 coding  | noncoding | noncoding | noncoding |
| MSTRG. 95375. 1 |              | XLOC_099499 | 310 coding  | coding    | noncoding | noncoding |
| MSTRG. 95383. 1 | GRM1         | XLOC_099503 | 317 coding  | noncoding | noncoding | noncoding |
| MSTRG. 95392. 1 | GRM1         | XLOC_099509 | 227 coding  | coding    | noncoding | noncoding |

|                |              |             |              |           |           |           |
|----------------|--------------|-------------|--------------|-----------|-----------|-----------|
| MSTRG.95400.1  | LOC101928661 | XLOC_099513 | 268 coding   | noncoding | noncoding | noncoding |
| MSTRG.95405.1  | ADGB         | XLOC_099516 | 312 coding   | noncoding | noncoding | noncoding |
| MSTRG.95438.1  | SAMD5        | XLOC_099537 | 277 coding   | noncoding | noncoding | noncoding |
| MSTRG.95559.1  | SASH1        | XLOC_099551 | 283 coding   | noncoding | noncoding | noncoding |
| MSTRG.95657.1  | PPIL4        | XLOC_099626 | 306 coding   | noncoding | noncoding | noncoding |
| NM_004690.4    | LATS1        | XLOC_099633 | 7362 coding  | coding    | coding    | coding    |
| NM_198887.3    | NUP43        | XLOC_099639 | 3831 coding  | noncoding | coding    | coding    |
| MSTRG.95734.1  | RAET1E-AS1   | XLOC_099644 | 267 coding   | noncoding | noncoding | noncoding |
| XM_017010831.2 | RAET1G       | XLOC_099645 | 2158 coding  | coding    | coding    | coding    |
| MSTRG.95728.1  |              | XLOC_099646 | 320 coding   | noncoding | noncoding | noncoding |
| MSTRG.95746.1  |              | XLOC_099650 | 240 coding   | noncoding | noncoding | noncoding |
| MSTRG.95803.1  | LOC105378054 | XLOC_099660 | 220 coding   | noncoding | noncoding | noncoding |
| MSTRG.95788.1  |              | XLOC_099662 | 223 coding   | noncoding | noncoding | noncoding |
| MSTRG.95781.1  |              | XLOC_099664 | 226 coding   | noncoding | noncoding | noncoding |
| MSTRG.95776.1  |              | XLOC_099669 | 267 coding   | noncoding | noncoding | noncoding |
| MSTRG.95773.1  |              | XLOC_099670 | 281 coding   | noncoding | noncoding | noncoding |
| MSTRG.95780.1  |              | XLOC_099671 | 276 coding   | noncoding | noncoding | noncoding |
| MSTRG.95813.1  |              | XLOC_099715 | 268 coding   | noncoding | noncoding | noncoding |
| XM_017011137.1 | ZBTB2        | XLOC_099725 | 3504 coding  | coding    | coding    | coding    |
| MSTRG.96418.1  | ESR1         | XLOC_099765 | 250 coding   | noncoding | noncoding | noncoding |
| XM_006715423.2 | SYNE1        | XLOC_099807 | 27714 coding | coding    | noncoding | coding    |
| MSTRG.96047.3  | MYCT1        | XLOC_099863 | 366 coding   | noncoding | noncoding | noncoding |
| MSTRG.96115.1  | RGS17        | XLOC_099878 | 240 coding   | noncoding | noncoding | noncoding |
| MSTRG.96058.1  |              | XLOC_099882 | 205 coding   | noncoding | noncoding | noncoding |
| MSTRG.96070.1  | LOC105378066 | XLOC_099885 | 214 coding   | noncoding | noncoding | noncoding |
| MSTRG.96074.1  |              | XLOC_099888 | 242 coding   | noncoding | noncoding | noncoding |
| MSTRG.96084.1  |              | XLOC_099893 | 209 coding   | noncoding | noncoding | noncoding |
| MSTRG.96089.1  |              | XLOC_099896 | 284 coding   | noncoding | noncoding | noncoding |
| NM_173515.4    | CNKSR3       | XLOC_099929 | 21078 coding | coding    | coding    | coding    |
| MSTRG.96120.1  |              | XLOC_099930 | 287 coding   | noncoding | noncoding | noncoding |
| MSTRG.96268.1  |              | XLOC_099951 | 314 coding   | noncoding | noncoding | noncoding |
| MSTRG.96271.1  |              | XLOC_099953 | 239 coding   | noncoding | noncoding | noncoding |
| MSTRG.96273.1  |              | XLOC_099954 | 1033 coding  | noncoding | noncoding | noncoding |
| MSTRG.96176.1  |              | XLOC_099962 | 241 coding   | noncoding | noncoding | noncoding |
| MSTRG.96803.1  | LOC101928923 | XLOC_099980 | 279 coding   | noncoding | noncoding | noncoding |
| MSTRG.96890.1  | LOC101928923 | XLOC_099995 | 282 coding   | noncoding | noncoding | noncoding |
| MSTRG.96916.1  | LOC101928923 | XLOC_099998 | 225 coding   | noncoding | noncoding | noncoding |
| MSTRG.96208.1  |              | XLOC_100018 | 279 coding   | noncoding | noncoding | noncoding |
| MSTRG.96222.1  |              | XLOC_100026 | 260 coding   | noncoding | noncoding | noncoding |
| MSTRG.96291.1  |              | XLOC_100047 | 236 coding   | noncoding | noncoding | noncoding |
| MSTRG.96310.1  | SNX9         | XLOC_100083 | 308 coding   | noncoding | noncoding | noncoding |
| MSTRG.96306.1  |              | XLOC_100090 | 214 coding   | noncoding | noncoding | noncoding |
| MSTRG.96353.1  | SYNJ2        | XLOC_100105 | 294 coding   | noncoding | noncoding | noncoding |

|                 |              |             |             |           |           |           |
|-----------------|--------------|-------------|-------------|-----------|-----------|-----------|
| MSTRG. 96408. 1 |              | XLOC_100122 | 254 coding  | noncoding | noncoding | noncoding |
| MSTRG. 96525. 1 |              | XLOC_100129 | 284 coding  | noncoding | noncoding | noncoding |
| MSTRG. 96677. 3 | TMEM181      | XLOC_100131 | 6221 coding | coding    | noncoding | noncoding |
| NM_001291602. 2 | DYNLT1       | XLOC_100132 | 688 coding  | coding    | coding    | noncoding |
| MSTRG. 97036. 1 |              | XLOC_100195 | 342 coding  | noncoding | noncoding | noncoding |
| MSTRG. 97026. 1 |              | XLOC_100197 | 432 coding  | noncoding | noncoding | noncoding |
| MSTRG. 97041. 1 |              | XLOC_100208 | 301 coding  | noncoding | noncoding | noncoding |
| MSTRG. 97056. 1 |              | XLOC_100236 | 288 coding  | noncoding | noncoding | noncoding |
| NM_003058. 4    | SLC22A2      | XLOC_100239 | 2409 coding | coding    | coding    | coding    |
| NM_005577. 3    | LPA          | XLOC_100252 | 6414 coding | coding    | coding    | coding    |
| MSTRG. 97139. 1 | LPA          | XLOC_100255 | 324 coding  | noncoding | noncoding | noncoding |
| MSTRG. 97113. 1 |              | XLOC_100256 | 224 coding  | noncoding | noncoding | noncoding |
| MSTRG. 97119. 1 | LOC105378093 | XLOC_100262 | 253 coding  | noncoding | noncoding | noncoding |
| MSTRG. 97236. 1 | AGPAT4       | XLOC_100279 | 736 coding  | noncoding | noncoding | noncoding |
| MSTRG. 97707. 1 | PRKN         | XLOC_100298 | 512 coding  | noncoding | noncoding | noncoding |
| MSTRG. 97775. 1 | PRKN         | XLOC_100313 | 282 coding  | noncoding | noncoding | noncoding |
| MSTRG. 97801. 1 | PRKN         | XLOC_100322 | 316 coding  | noncoding | noncoding | noncoding |
| MSTRG. 97860. 1 | PRKN         | XLOC_100333 | 231 coding  | noncoding | noncoding | noncoding |
| MSTRG. 97892. 1 | PRKN         | XLOC_100335 | 268 coding  | noncoding | noncoding | noncoding |
| MSTRG. 97251. 1 |              | XLOC_100365 | 273 coding  | noncoding | noncoding | noncoding |
| MSTRG. 97264. 1 |              | XLOC_100378 | 287 coding  | noncoding | noncoding | noncoding |
| MSTRG. 97301. 1 | LOC107986667 | XLOC_100399 | 303 coding  | noncoding | noncoding | noncoding |
| MSTRG. 97302. 1 | LOC107986667 | XLOC_100400 | 312 coding  | noncoding | noncoding | noncoding |
| MSTRG. 97310. 1 |              | XLOC_100403 | 276 coding  | noncoding | noncoding | noncoding |
| MSTRG. 97321. 1 |              | XLOC_100408 | 308 coding  | noncoding | noncoding | noncoding |
| MSTRG. 97322. 1 |              | XLOC_100409 | 206 coding  | noncoding | noncoding | noncoding |
| MSTRG. 97323. 1 |              | XLOC_100410 | 263 coding  | noncoding | noncoding | noncoding |
| XM_017010197. 2 | PDE10A       | XLOC_100413 | 6375 coding | coding    | coding    | coding    |
| MSTRG. 97352. 1 | PDE10A       | XLOC_100416 | 304 coding  | noncoding | noncoding | noncoding |
| MSTRG. 97356. 1 | PDE10A       | XLOC_100418 | 351 coding  | noncoding | noncoding | noncoding |
| NM_003181. 3    | TBXT         | XLOC_100430 | 2486 coding | coding    | coding    | coding    |
| XM_017011399. 1 | RNASET2      | XLOC_100482 | 1172 coding | coding    | coding    | coding    |
| MSTRG. 97498. 1 |              | XLOC_100531 | 259 coding  | noncoding | noncoding | noncoding |
| NM_024919. 5    | FRMD1        | XLOC_100557 | 5699 coding | coding    | coding    | coding    |
| MSTRG. 97529. 1 |              | XLOC_100565 | 213 coding  | noncoding | noncoding | noncoding |
| XM_011535684. 3 | WDR27        | XLOC_100599 | 4150 coding | coding    | coding    | coding    |
| MSTRG. 97676. 1 | WDR27        | XLOC_100603 | 256 coding  | noncoding | noncoding | noncoding |
| MSTRG. 97624. 1 |              | XLOC_100624 | 295 coding  | noncoding | noncoding | noncoding |
| MSTRG. 98009. 1 |              | XLOC_100670 | 324 coding  | noncoding | noncoding | noncoding |
| MSTRG. 98049. 1 | DNAAF5       | XLOC_100685 | 246 coding  | noncoding | noncoding | noncoding |
| MSTRG. 98147. 1 | SUN1         | XLOC_100689 | 267 coding  | noncoding | noncoding | noncoding |
| MSTRG. 98165. 1 |              | XLOC_100714 | 430 coding  | noncoding | noncoding | coding    |
| MSTRG. 98170. 1 | UNCX         | XLOC_100717 | 260 coding  | noncoding | noncoding | noncoding |

|                |              |             |              |           |           |           |
|----------------|--------------|-------------|--------------|-----------|-----------|-----------|
| MSTRG.98216.1  | INTS1        | XLOC_100727 | 3746 coding  | coding    | coding    | noncoding |
| MSTRG.98223.1  |              | XLOC_100736 | 280 coding   | noncoding | noncoding | noncoding |
| MSTRG.98234.1  |              | XLOC_100739 | 228 coding   | noncoding | noncoding | noncoding |
| XR_108730.4    | LOC100127955 | XLOC_100746 | 8450 coding  | noncoding | coding    | coding    |
| MSTRG.98264.1  | SNX8         | XLOC_100756 | 249 coding   | noncoding | noncoding | noncoding |
| MSTRG.98369.2  | CARD11       | XLOC_100780 | 1624 coding  | noncoding | coding    | noncoding |
| MSTRG.98358.1  |              | XLOC_100795 | 377 coding   | coding    | noncoding | noncoding |
| MSTRG.98360.1  | LOC100129603 | XLOC_100796 | 237 coding   | noncoding | noncoding | noncoding |
| XM_024446683.1 | SDK1         | XLOC_100798 | 10437 coding | coding    | coding    | coding    |
| MSTRG.98565.1  | SDK1         | XLOC_100813 | 296 coding   | noncoding | noncoding | noncoding |
| MSTRG.98388.1  |              | XLOC_100820 | 242 coding   | noncoding | noncoding | noncoding |
| MSTRG.98397.1  |              | XLOC_100828 | 236 coding   | noncoding | noncoding | noncoding |
| MSTRG.98421.1  | MMD2         | XLOC_100839 | 219 coding   | noncoding | noncoding | noncoding |
| MSTRG.98451.1  | RBAK         | XLOC_100848 | 252 coding   | noncoding | noncoding | noncoding |
| MSTRG.98446.1  |              | XLOC_100857 | 318 coding   | noncoding | noncoding | noncoding |
| NM_001033520.1 | WIPI2        | XLOC_100858 | 4295 coding  | noncoding | coding    | coding    |
| XM_011515200.2 | SLC29A4      | XLOC_100860 | 2906 coding  | coding    | coding    | coding    |
| MSTRG.98603.1  | SLC29A4      | XLOC_100861 | 305 coding   | noncoding | noncoding | noncoding |
| MSTRG.98611.1  | TNRC18       | XLOC_100867 | 313 coding   | noncoding | noncoding | noncoding |
| MSTRG.98613.1  | TNRC18       | XLOC_100869 | 7141 coding  | noncoding | noncoding | coding    |
| MSTRG.98587.1  |              | XLOC_100875 | 267 coding   | noncoding | noncoding | noncoding |
| MSTRG.98589.1  | FBXL18       | XLOC_100876 | 235 coding   | noncoding | noncoding | noncoding |
| MSTRG.98640.1  | FSCN1        | XLOC_100889 | 305 coding   | noncoding | noncoding | noncoding |
| MSTRG.98632.1  | OCM          | XLOC_100896 | 292 coding   | noncoding | noncoding | noncoding |
| MSTRG.98672.3  | AIMP2        | XLOC_100902 | 4159 coding  | coding    | coding    | coding    |
| MSTRG.98635.1  |              | XLOC_100905 | 274 coding   | noncoding | noncoding | noncoding |
| MSTRG.98684.1  | USP42        | XLOC_100907 | 264 coding   | noncoding | noncoding | noncoding |
| MSTRG.98695.1  | CYTH3        | XLOC_100913 | 577 coding   | noncoding | noncoding | noncoding |
| MSTRG.98696.1  | CYTH3        | XLOC_100914 | 244 coding   | noncoding | noncoding | noncoding |
| MSTRG.98701.1  | CYTH3        | XLOC_100919 | 250 coding   | noncoding | noncoding | noncoding |
| MSTRG.98660.1  |              | XLOC_100930 | 282 coding   | noncoding | noncoding | noncoding |
| MSTRG.98722.1  |              | XLOC_100932 | 218 coding   | noncoding | noncoding | noncoding |
| MSTRG.98678.1  |              | XLOC_100936 | 257 coding   | noncoding | noncoding | noncoding |
| XR_927004.2    | LOC101927325 | XLOC_100940 | 1556 coding  | noncoding | noncoding | noncoding |
| MSTRG.98718.1  | GRID2IP      | XLOC_100941 | 278 coding   | noncoding | noncoding | noncoding |
| MSTRG.98719.1  | GRID2IP      | XLOC_100942 | 284 coding   | noncoding | noncoding | noncoding |
| MSTRG.98720.1  | GRID2IP      | XLOC_100943 | 240 coding   | noncoding | noncoding | noncoding |
| MSTRG.98755.1  |              | XLOC_100957 | 225 coding   | noncoding | noncoding | noncoding |
| MSTRG.98764.1  |              | XLOC_100961 | 235 coding   | noncoding | noncoding | noncoding |
| MSTRG.98769.1  |              | XLOC_100963 | 281 coding   | coding    | noncoding | noncoding |
| MSTRG.98771.1  |              | XLOC_100964 | 275 coding   | noncoding | noncoding | noncoding |
| MSTRG.98793.1  | LOC100131257 | XLOC_100971 | 230 coding   | noncoding | noncoding | noncoding |
| MSTRG.98901.1  | LOC105375144 | XLOC_101140 | 220 coding   | noncoding | noncoding | noncoding |

|                  |              |             |             |           |           |           |
|------------------|--------------|-------------|-------------|-----------|-----------|-----------|
| MSTRG. 98892. 1  |              | XLOC_101145 | 219 coding  | noncoding | noncoding | noncoding |
| MSTRG. 98912. 1  |              | XLOC_101147 | 276 coding  | noncoding | noncoding | noncoding |
| MSTRG. 98923. 1  |              | XLOC_101151 | 237 coding  | coding    | noncoding | noncoding |
| MSTRG. 98932. 1  |              | XLOC_101157 | 267 coding  | noncoding | noncoding | noncoding |
| MSTRG. 98939. 1  |              | XLOC_101168 | 251 coding  | noncoding | noncoding | noncoding |
| MSTRG. 98940. 1  |              | XLOC_101169 | 432 coding  | noncoding | noncoding | noncoding |
| MSTRG. 99003. 1  | LOC105375149 | XLOC_101172 | 362 coding  | noncoding | noncoding | noncoding |
| MSTRG. 99005. 1  | LOC105375149 | XLOC_101173 | 209 coding  | noncoding | noncoding | noncoding |
| MSTRG. 99006. 1  | LOC105375149 | XLOC_101174 | 396 coding  | noncoding | noncoding | noncoding |
| MSTRG. 99020. 1  | MGC4859      | XLOC_101189 | 275 coding  | noncoding | noncoding | noncoding |
| NM_001007157. 2  | PHF14        | XLOC_101202 | 3427 coding | coding    | coding    | coding    |
| MSTRG. 99045. 1  |              | XLOC_101226 | 333 coding  | noncoding | noncoding | noncoding |
| MSTRG. 99050. 1  |              | XLOC_101228 | 243 coding  | noncoding | noncoding | noncoding |
| MSTRG. 99077. 1  | LOC105375153 | XLOC_101230 | 406 coding  | noncoding | noncoding | noncoding |
| MSTRG. 99181. 1  |              | XLOC_101290 | 231 coding  | noncoding | noncoding | noncoding |
| MSTRG. 99187. 1  | LOC102725191 | XLOC_101294 | 247 coding  | noncoding | noncoding | noncoding |
| MSTRG. 99225. 1  |              | XLOC_101304 | 303 coding  | noncoding | coding    | noncoding |
| MSTRG. 99244. 1  | LOC105375158 | XLOC_101314 | 287 coding  | noncoding | noncoding | noncoding |
| MSTRG. 99258. 1  | LOC107986770 | XLOC_101324 | 683 coding  | noncoding | noncoding | noncoding |
| MSTRG. 99272. 1  | LOC107986770 | XLOC_101329 | 202 coding  | noncoding | noncoding | noncoding |
| MSTRG. 99277. 1  |              | XLOC_101336 | 260 coding  | coding    | noncoding | noncoding |
| MSTRG. 99289. 1  | DGKB         | XLOC_101338 | 250 coding  | noncoding | noncoding | noncoding |
| MSTRG. 99305. 1  | DGKB         | XLOC_101348 | 317 coding  | noncoding | noncoding | noncoding |
| MSTRG. 99378. 1  | AGMO         | XLOC_101353 | 320 coding  | noncoding | noncoding | noncoding |
| MSTRG. 99394. 1  | AGMO         | XLOC_101366 | 794 coding  | noncoding | noncoding | noncoding |
| MSTRG. 99321. 1  | LOC105375167 | XLOC_101390 | 246 coding  | noncoding | noncoding | noncoding |
| MSTRG. 99336. 1  |              | XLOC_101406 | 346 coding  | noncoding | noncoding | noncoding |
| MSTRG. 99370. 1  |              | XLOC_101420 | 227 coding  | noncoding | noncoding | noncoding |
| MSTRG. 99372. 1  |              | XLOC_101422 | 290 coding  | noncoding | noncoding | noncoding |
| MSTRG. 99483. 1  |              | XLOC_101471 | 217 coding  | noncoding | noncoding | noncoding |
| MSTRG. 99709. 4  | SNX13        | XLOC_101511 | 4876 coding | coding    | noncoding | noncoding |
| MSTRG. 99709. 15 | SNX13        | XLOC_101511 | 486 coding  | noncoding | noncoding | noncoding |
| MSTRG. 99571. 1  |              | XLOC_101512 | 313 coding  | coding    | noncoding | noncoding |
| MSTRG. 99574. 1  |              | XLOC_101514 | 413 coding  | noncoding | noncoding | noncoding |
| MSTRG. 99743. 1  |              | XLOC_101591 | 307 coding  | noncoding | noncoding | noncoding |
| MSTRG. 99775. 1  |              | XLOC_101611 | 249 coding  | noncoding | noncoding | noncoding |
| MSTRG. 99790. 1  |              | XLOC_101614 | 277 coding  | noncoding | noncoding | noncoding |
| MSTRG. 99807. 1  | LOC101927668 | XLOC_101622 | 240 coding  | noncoding | noncoding | noncoding |
| XM_011515393. 2  | ITGB8        | XLOC_101635 | 8575 coding | coding    | coding    | coding    |
| MSTRG. 99869. 6  | ABCB5        | XLOC_101657 | 257 coding  | noncoding | noncoding | noncoding |
| MSTRG. 99883. 1  |              | XLOC_101670 | 217 coding  | noncoding | noncoding | noncoding |
| MSTRG. 99889. 1  |              | XLOC_101686 | 276 coding  | noncoding | noncoding | noncoding |
| MSTRG. 100053. 3 | FAM126A      | XLOC_101774 | 3536 coding | coding    | noncoding | noncoding |

|                |              |             |             |           |           |           |
|----------------|--------------|-------------|-------------|-----------|-----------|-----------|
| MSTRG.100083.1 | KLHL7        | XLOC_101784 | 214 coding  | noncoding | noncoding | noncoding |
| MSTRG.100066.1 |              | XLOC_101787 | 292 coding  | noncoding | noncoding | noncoding |
| MSTRG.100069.1 | GPNMB        | XLOC_101790 | 316 coding  | noncoding | noncoding | noncoding |
| MSTRG.100092.1 | IGF2BP3      | XLOC_101793 | 217 coding  | noncoding | noncoding | noncoding |
| MSTRG.100094.1 |              | XLOC_101800 | 488 coding  | noncoding | noncoding | noncoding |
| MSTRG.100095.1 |              | XLOC_101801 | 280 coding  | noncoding | noncoding | noncoding |
| MSTRG.100126.1 | STK31        | XLOC_101808 | 239 coding  | noncoding | noncoding | noncoding |
| MSTRG.100128.1 | STK31        | XLOC_101810 | 291 coding  | noncoding | noncoding | noncoding |
| MSTRG.100131.1 | STK31        | XLOC_101811 | 219 coding  | noncoding | noncoding | noncoding |
| MSTRG.100119.1 |              | XLOC_101816 | 292 coding  | coding    | noncoding | noncoding |
| XM_005249775.5 | MPP6         | XLOC_101826 | 8127 coding | coding    | coding    | coding    |
| MSTRG.100170.1 | GSDME        | XLOC_101835 | 229 coding  | noncoding | noncoding | noncoding |
| MSTRG.100174.1 |              | XLOC_101844 | 305 coding  | noncoding | noncoding | noncoding |
| MSTRG.100176.1 |              | XLOC_101845 | 283 coding  | noncoding | noncoding | noncoding |
| MSTRG.100209.1 | C7orf31      | XLOC_101853 | 267 coding  | noncoding | noncoding | noncoding |
| MSTRG.100191.1 | LOC105375191 | XLOC_101857 | 275 coding  | noncoding | noncoding | noncoding |
| MSTRG.100216.1 |              | XLOC_101869 | 262 coding  | noncoding | noncoding | noncoding |
| MSTRG.100243.1 | LOC646588    | XLOC_101885 | 287 coding  | noncoding | noncoding | noncoding |
| MSTRG.100254.1 | LOC105375199 | XLOC_101892 | 215 coding  | noncoding | noncoding | noncoding |
| MSTRG.100255.1 | LOC105375199 | XLOC_101893 | 297 coding  | noncoding | noncoding | noncoding |
| MSTRG.100263.1 | LOC105375199 | XLOC_101895 | 250 coding  | noncoding | noncoding | noncoding |
| MSTRG.100295.1 |              | XLOC_101903 | 261 coding  | noncoding | noncoding | noncoding |
| XM_017012086.1 | SNX10        | XLOC_101904 | 3232 coding | coding    | coding    | coding    |
| XM_006715712.2 | SNX10        | XLOC_101904 | 2778 coding | coding    | coding    | coding    |
| XM_017012809.1 | CREB5        | XLOC_102002 | 8298 coding | coding    | coding    | coding    |
| XM_017012807.1 | CREB5        | XLOC_102002 | 9385 coding | coding    | coding    | coding    |
| MSTRG.100680.1 | CREB5        | XLOC_102003 | 283 coding  | noncoding | noncoding | noncoding |
| MSTRG.100685.1 | CREB5        | XLOC_102005 | 296 coding  | noncoding | noncoding | noncoding |
| MSTRG.100863.1 |              | XLOC_102132 | 259 coding  | coding    | noncoding | noncoding |
| MSTRG.100867.1 |              | XLOC_102134 | 220 coding  | noncoding | noncoding | noncoding |
| MSTRG.100906.1 | INMT-MINDY4  | XLOC_102158 | 585 coding  | noncoding | noncoding | noncoding |
| MSTRG.100922.1 | LOC107986781 | XLOC_102171 | 228 coding  | coding    | noncoding | noncoding |
| MSTRG.100923.1 | LOC107986781 | XLOC_102172 | 273 coding  | noncoding | noncoding | noncoding |
| MSTRG.100925.1 |              | XLOC_102175 | 253 coding  | noncoding | noncoding | noncoding |
| MSTRG.100926.1 |              | XLOC_102176 | 284 coding  | noncoding | noncoding | noncoding |
| MSTRG.100961.1 | ITPRID1      | XLOC_102180 | 301 coding  | noncoding | noncoding | noncoding |
| MSTRG.101013.1 |              | XLOC_102241 | 223 coding  | noncoding | noncoding | noncoding |
| MSTRG.101335.1 | BBS9         | XLOC_102249 | 332 coding  | coding    | noncoding | noncoding |
| MSTRG.101348.1 | BBS9         | XLOC_102261 | 249 coding  | noncoding | noncoding | noncoding |
| MSTRG.101353.1 | BBS9         | XLOC_102266 | 226 coding  | noncoding | noncoding | noncoding |
| MSTRG.101166.1 | BMPER        | XLOC_102282 | 283 coding  | noncoding | noncoding | noncoding |
| MSTRG.101191.1 | NPSR1-AS1    | XLOC_102291 | 281 coding  | noncoding | noncoding | noncoding |
| MSTRG.101204.1 | TBX20        | XLOC_102307 | 320 coding  | noncoding | noncoding | noncoding |

|                   |              |             |             |           |           |           |
|-------------------|--------------|-------------|-------------|-----------|-----------|-----------|
| MSTRG. 101211. 1  | LOC401324    | XLOC_102313 | 249 coding  | noncoding | noncoding | noncoding |
| MSTRG. 101214. 1  |              | XLOC_102316 | 390 coding  | noncoding | noncoding | noncoding |
| MSTRG. 101254. 1  | SEPTIN7-AS1  | XLOC_102341 | 257 coding  | noncoding | noncoding | noncoding |
| MSTRG. 101297. 10 | SEPTIN7      | XLOC_102350 | 4331 coding | coding    | coding    | coding    |
| MSTRG. 101293. 1  |              | XLOC_102356 | 281 coding  | noncoding | noncoding | noncoding |
| MSTRG. 101380. 1  | KIAA0895     | XLOC_102384 | 254 coding  | noncoding | noncoding | noncoding |
| MSTRG. 101389. 1  | ANLN         | XLOC_102389 | 255 coding  | noncoding | noncoding | noncoding |
| MSTRG. 101835. 5  | ELMO1-AS1    | XLOC_102427 | 3550 coding | coding    | coding    | noncoding |
| MSTRG. 101468. 1  |              | XLOC_102454 | 733 coding  | noncoding | noncoding | noncoding |
| MSTRG. 101666. 9  | TRGC2        | XLOC_102459 | 1513 coding | coding    | noncoding | noncoding |
| MSTRG. 101666. 10 | TRGC2        | XLOC_102459 | 3345 coding | coding    | noncoding | noncoding |
| MSTRG. 101666. 17 | TRGC2        | XLOC_102459 | 1458 coding | coding    | noncoding | noncoding |
| MSTRG. 101666. 21 | TARP         | XLOC_102459 | 1286 coding | coding    | noncoding | noncoding |
| MSTRG. 101666. 23 | TRGC2        | XLOC_102459 | 1274 coding | coding    | noncoding | noncoding |
| MSTRG. 101666. 24 | TRGC2        | XLOC_102459 | 1489 coding | coding    | noncoding | noncoding |
| MSTRG. 101666. 26 | TRGC2        | XLOC_102459 | 2205 coding | coding    | noncoding | noncoding |
| MSTRG. 101519. 1  | POU6F2       | XLOC_102500 | 473 coding  | noncoding | coding    | noncoding |
| MSTRG. 101522. 1  | POU6F2       | XLOC_102501 | 237 coding  | noncoding | noncoding | noncoding |
| MSTRG. 101504. 1  |              | XLOC_102506 | 215 coding  | noncoding | noncoding | noncoding |
| MSTRG. 101542. 1  |              | XLOC_102515 | 248 coding  | noncoding | noncoding | noncoding |
| MSTRG. 101586. 1  |              | XLOC_102521 | 301 coding  | noncoding | noncoding | noncoding |
| MSTRG. 101626. 1  | CDK13        | XLOC_102549 | 339 coding  | noncoding | coding    | noncoding |
| MSTRG. 101634. 1  |              | XLOC_102556 | 308 coding  | noncoding | noncoding | noncoding |
| MSTRG. 102055. 1  | SUGCT        | XLOC_102574 | 226 coding  | noncoding | noncoding | noncoding |
| MSTRG. 102075. 1  | SUGCT        | XLOC_102577 | 650 coding  | noncoding | noncoding | noncoding |
| MSTRG. 101652. 1  |              | XLOC_102582 | 253 coding  | noncoding | noncoding | noncoding |
| MSTRG. 101710. 1  |              | XLOC_102593 | 237 coding  | noncoding | noncoding | noncoding |
| MSTRG. 101735. 1  | LOC107986788 | XLOC_102605 | 361 coding  | noncoding | noncoding | noncoding |
| XM_011515224. 2   | HECW1        | XLOC_102652 | 9496 coding | coding    | coding    | coding    |
| MSTRG. 102121. 1  | HECW1        | XLOC_102658 | 216 coding  | noncoding | noncoding | noncoding |
| MSTRG. 102190. 12 | COA1         | XLOC_102660 | 840 coding  | coding    | noncoding | noncoding |
| MSTRG. 102129. 1  | LOC102724946 | XLOC_102663 | 561 coding  | noncoding | noncoding | noncoding |
| MSTRG. 102123. 1  |              | XLOC_102665 | 652 coding  | noncoding | noncoding | noncoding |
| MSTRG. 102144. 1  | URGCP        | XLOC_102668 | 494 coding  | coding    | noncoding | noncoding |
| MSTRG. 102153. 1  | POLR2J4      | XLOC_102675 | 280 coding  | noncoding | noncoding | noncoding |
| NM_001129. 5      | AEBP1        | XLOC_102685 | 4097 coding | coding    | coding    | coding    |
| MSTRG. 102181. 2  | POLD2        | XLOC_102687 | 1602 coding | coding    | coding    | noncoding |
| MSTRG. 102197. 1  | CAMK2B       | XLOC_102695 | 230 coding  | noncoding | noncoding | noncoding |
| MSTRG. 102186. 1  |              | XLOC_102697 | 260 coding  | noncoding | noncoding | noncoding |
| MSTRG. 102252. 1  | OGDH         | XLOC_102712 | 234 coding  | noncoding | noncoding | noncoding |
| MSTRG. 102230. 1  |              | XLOC_102719 | 287 coding  | noncoding | noncoding | noncoding |
| MSTRG. 102289. 1  |              | XLOC_102752 | 313 coding  | noncoding | noncoding | noncoding |
| MSTRG. 102296. 1  |              | XLOC_102756 | 250 coding  | noncoding | noncoding | noncoding |

|                  |              |             |              |           |           |           |
|------------------|--------------|-------------|--------------|-----------|-----------|-----------|
| MSTRG. 102299. 1 |              | XLOC_102757 | 225 coding   | noncoding | noncoding | noncoding |
| MSTRG. 102415. 1 |              | XLOC_102785 | 247 coding   | noncoding | noncoding | noncoding |
| MSTRG. 102420. 1 |              | XLOC_102787 | 273 coding   | noncoding | noncoding | noncoding |
| MSTRG. 102447. 1 |              | XLOC_102801 | 502 coding   | noncoding | noncoding | noncoding |
| MSTRG. 102511. 2 | TNS3         | XLOC_102814 | 369 coding   | noncoding | noncoding | noncoding |
| NM_001123065. 1  | C7orf65      | XLOC_102820 | 2911 coding  | noncoding | coding    | noncoding |
| MSTRG. 102476. 1 | PKD1L1       | XLOC_102827 | 299 coding   | noncoding | noncoding | noncoding |
| MSTRG. 102478. 1 | PKD1L1       | XLOC_102829 | 227 coding   | noncoding | noncoding | noncoding |
| MSTRG. 102481. 1 | PKD1L1       | XLOC_102832 | 245 coding   | noncoding | noncoding | noncoding |
| MSTRG. 102472. 1 |              | XLOC_102848 | 250 coding   | noncoding | noncoding | noncoding |
| MSTRG. 102520. 1 |              | XLOC_102852 | 457 coding   | noncoding | noncoding | noncoding |
| MSTRG. 102521. 1 |              | XLOC_102853 | 278 coding   | coding    | noncoding | noncoding |
| MSTRG. 102530. 1 |              | XLOC_102870 | 263 coding   | noncoding | noncoding | noncoding |
| MSTRG. 102554. 1 |              | XLOC_102884 | 279 coding   | noncoding | noncoding | noncoding |
| NM_198570. 5     | VWC2         | XLOC_102904 | 11322 coding | coding    | coding    | coding    |
| MSTRG. 102607. 1 | SPATA48      | XLOC_102908 | 257 coding   | noncoding | noncoding | noncoding |
| MSTRG. 102591. 1 |              | XLOC_102913 | 289 coding   | noncoding | noncoding | noncoding |
| MSTRG. 102592. 1 |              | XLOC_102914 | 323 coding   | noncoding | noncoding | noncoding |
| MSTRG. 102671. 1 | DDC          | XLOC_102965 | 223 coding   | noncoding | noncoding | noncoding |
| MSTRG. 102714. 1 | COBL         | XLOC_103008 | 221 coding   | noncoding | noncoding | noncoding |
| MSTRG. 102739. 1 |              | XLOC_103027 | 235 coding   | noncoding | noncoding | noncoding |
| MSTRG. 102819. 1 |              | XLOC_103038 | 289 coding   | noncoding | noncoding | noncoding |
| MSTRG. 102815. 1 |              | XLOC_103042 | 240 coding   | noncoding | noncoding | noncoding |
| MSTRG. 102822. 1 |              | XLOC_103051 | 230 coding   | coding    | noncoding | noncoding |
| MSTRG. 102826. 1 |              | XLOC_103053 | 287 coding   | noncoding | noncoding | noncoding |
| MSTRG. 102838. 1 | LINC01446    | XLOC_103057 | 273 coding   | noncoding | noncoding | noncoding |
| MSTRG. 102842. 1 |              | XLOC_103062 | 339 coding   | noncoding | noncoding | noncoding |
| MSTRG. 102843. 1 |              | XLOC_103063 | 323 coding   | noncoding | noncoding | noncoding |
| XM_017011841. 1  | VSTM2A       | XLOC_103068 | 9245 coding  | coding    | coding    | coding    |
| MSTRG. 102864. 1 |              | XLOC_103082 | 271 coding   | noncoding | noncoding | noncoding |
| MSTRG. 102887. 1 |              | XLOC_103094 | 287 coding   | noncoding | noncoding | noncoding |
| MSTRG. 102952. 1 |              | XLOC_103111 | 242 coding   | noncoding | noncoding | noncoding |
| MSTRG. 102954. 1 |              | XLOC_103112 | 214 coding   | noncoding | noncoding | noncoding |
| MSTRG. 102956. 1 | LOC101060341 | XLOC_103113 | 338 coding   | coding    | noncoding | noncoding |
| MSTRG. 102959. 1 |              | XLOC_103115 | 312 coding   | noncoding | noncoding | noncoding |
| MSTRG. 102962. 1 | SEPTIN14     | XLOC_103118 | 269 coding   | noncoding | noncoding | noncoding |
| NM_182633. 3     | ZNF713       | XLOC_103119 | 4358 coding  | coding    | coding    | coding    |
| MSTRG. 102971. 3 | NIPSNAP2     | XLOC_103121 | 536 coding   | coding    | noncoding | noncoding |
| NM_001366648. 2  | SUMF2        | XLOC_103132 | 2108 coding  | coding    | coding    | coding    |
| NM_001146333. 2  | SUMF2        | XLOC_103132 | 1835 coding  | coding    | coding    | coding    |
| MSTRG. 103040. 1 | PHKG1        | XLOC_103134 | 255 coding   | noncoding | noncoding | noncoding |
| MSTRG. 103013. 1 |              | XLOC_103137 | 385 coding   | noncoding | noncoding | noncoding |
| MSTRG. 103021. 1 | LOC650226    | XLOC_103140 | 325 coding   | coding    | noncoding | noncoding |

|                  |              |             |              |           |           |           |
|------------------|--------------|-------------|--------------|-----------|-----------|-----------|
| MSTRG. 103022. 1 | LOC650226    | XLOC_103141 | 287 coding   | noncoding | noncoding | noncoding |
| MSTRG. 103041. 1 |              | XLOC_103149 | 259 coding   | noncoding | noncoding | noncoding |
| MSTRG. 103052. 1 |              | XLOC_103150 | 318 coding   | coding    | noncoding | noncoding |
| MSTRG. 103053. 1 |              | XLOC_103152 | 239 coding   | noncoding | noncoding | noncoding |
| MSTRG. 103059. 1 | ZNF479       | XLOC_103155 | 324 coding   | noncoding | noncoding | noncoding |
| MSTRG. 103062. 1 | GUSBP10      | XLOC_103157 | 281 coding   | noncoding | coding    | noncoding |
| MSTRG. 103065. 1 |              | XLOC_103161 | 279 coding   | noncoding | noncoding | noncoding |
| NR_120505. 1     | LOC100653233 | XLOC_103163 | 1569 coding  | noncoding | noncoding | noncoding |
| MSTRG. 103089. 1 |              | XLOC_103175 | 234 coding   | noncoding | noncoding | noncoding |
| MSTRG. 103109. 1 |              | XLOC_103187 | 294 coding   | noncoding | noncoding | noncoding |
| MSTRG. 103158. 1 |              | XLOC_103213 | 318 coding   | noncoding | noncoding | noncoding |
| MSTRG. 103164. 1 |              | XLOC_103215 | 360 coding   | noncoding | noncoding | noncoding |
| MSTRG. 103171. 1 |              | XLOC_103220 | 261 coding   | noncoding | noncoding | noncoding |
| MSTRG. 103172. 1 |              | XLOC_103221 | 278 coding   | noncoding | noncoding | noncoding |
| MSTRG. 103175. 1 |              | XLOC_103223 | 242 coding   | noncoding | noncoding | noncoding |
| MSTRG. 103182. 1 |              | XLOC_103231 | 251 coding   | noncoding | noncoding | noncoding |
| MSTRG. 103186. 1 |              | XLOC_103236 | 297 coding   | noncoding | noncoding | noncoding |
| MSTRG. 103244. 1 |              | XLOC_103245 | 275 coding   | noncoding | noncoding | noncoding |
| MSTRG. 103267. 1 |              | XLOC_103264 | 265 coding   | noncoding | noncoding | noncoding |
| NR_077227. 1     | LOC100128885 | XLOC_103280 | 4369 coding  | noncoding | noncoding | coding    |
| MSTRG. 103204. 1 |              | XLOC_103293 | 215 coding   | noncoding | noncoding | noncoding |
| MSTRG. 103214. 1 | ZNF138       | XLOC_103298 | 284 coding   | noncoding | noncoding | noncoding |
| MSTRG. 103217. 1 | ZNF138       | XLOC_103301 | 312 coding   | noncoding | noncoding | noncoding |
| MSTRG. 103206. 1 | ZNF138       | XLOC_103303 | 222 coding   | noncoding | noncoding | noncoding |
| MSTRG. 103359. 5 | ZNF117       | XLOC_103315 | 14335 coding | coding    | coding    | noncoding |
| MSTRG. 103359. 9 | ZNF117       | XLOC_103315 | 7374 coding  | coding    | noncoding | noncoding |
| MSTRG. 103383. 1 |              | XLOC_103334 | 218 coding   | noncoding | noncoding | noncoding |
| MSTRG. 103385. 1 | LOC105375334 | XLOC_103336 | 255 coding   | noncoding | noncoding | noncoding |
| MSTRG. 103324. 1 | VKORC1L1     | XLOC_103361 | 231 coding   | noncoding | noncoding | noncoding |
| MSTRG. 103338. 1 | CRCP         | XLOC_103367 | 481 coding   | noncoding | noncoding | noncoding |
| MSTRG. 103331. 1 |              | XLOC_103372 | 206 coding   | noncoding | noncoding | noncoding |
| NM_001367755. 1  | RABGEF1      | XLOC_103402 | 4781 coding  | coding    | coding    | coding    |
| MSTRG. 103590. 1 | GTF2IP23     | XLOC_103405 | 255 coding   | noncoding | noncoding | noncoding |
| MSTRG. 103492. 1 | TYW1         | XLOC_103412 | 259 coding   | noncoding | noncoding | noncoding |
| MSTRG. 103399. 1 |              | XLOC_103436 | 238 coding   | noncoding | noncoding | noncoding |
| MSTRG. 103400. 1 |              | XLOC_103437 | 249 coding   | noncoding | noncoding | noncoding |
| MSTRG. 103420. 1 |              | XLOC_103448 | 240 coding   | noncoding | noncoding | noncoding |
| MSTRG. 103422. 1 |              | XLOC_103449 | 206 coding   | noncoding | noncoding | noncoding |
| MSTRG. 103426. 1 |              | XLOC_103451 | 295 coding   | noncoding | noncoding | noncoding |
| MSTRG. 103430. 1 |              | XLOC_103452 | 265 coding   | noncoding | noncoding | noncoding |
| MSTRG. 103432. 1 |              | XLOC_103457 | 307 coding   | noncoding | noncoding | noncoding |
| MSTRG. 103444. 1 |              | XLOC_103460 | 217 coding   | noncoding | noncoding | noncoding |
| MSTRG. 103454. 1 |              | XLOC_103466 | 223 coding   | noncoding | noncoding | noncoding |

|                  |              |             |             |           |           |           |
|------------------|--------------|-------------|-------------|-----------|-----------|-----------|
| MSTRG. 103458. 1 |              | XLOC_103467 | 237 coding  | noncoding | noncoding | noncoding |
| MSTRG. 103476. 1 |              | XLOC_103475 | 229 coding  | noncoding | noncoding | noncoding |
| MSTRG. 103478. 1 |              | XLOC_103476 | 566 coding  | noncoding | noncoding | noncoding |
| MSTRG. 103480. 1 |              | XLOC_103477 | 262 coding  | noncoding | noncoding | noncoding |
| MSTRG. 103483. 1 | LOC105375346 | XLOC_103479 | 255 coding  | noncoding | noncoding | noncoding |
| XM_017011951. 2  | AUTS2        | XLOC_103484 | 6684 coding | coding    | coding    | coding    |
| MSTRG. 104011. 1 | AUTS2        | XLOC_103486 | 224 coding  | noncoding | noncoding | noncoding |
| MSTRG. 104046. 1 | AUTS2        | XLOC_103493 | 225 coding  | noncoding | noncoding | noncoding |
| MSTRG. 104062. 1 | AUTS2        | XLOC_103498 | 277 coding  | noncoding | noncoding | noncoding |
| MSTRG. 104083. 1 | AUTS2        | XLOC_103501 | 250 coding  | noncoding | noncoding | noncoding |
| MSTRG. 104133. 1 | AUTS2        | XLOC_103505 | 328 coding  | noncoding | noncoding | noncoding |
| MSTRG. 103597. 1 |              | XLOC_103516 | 466 coding  | noncoding | noncoding | noncoding |
| MSTRG. 103599. 1 |              | XLOC_103517 | 429 coding  | noncoding | noncoding | noncoding |
| MSTRG. 103601. 1 |              | XLOC_103518 | 217 coding  | noncoding | noncoding | noncoding |
| MSTRG. 103606. 1 |              | XLOC_103521 | 273 coding  | noncoding | noncoding | noncoding |
| NM_022479. 3     | GALNT17      | XLOC_103523 | 3909 coding | coding    | coding    | coding    |
| MSTRG. 103616. 1 | GALNT17      | XLOC_103524 | 648 coding  | noncoding | noncoding | noncoding |
| MSTRG. 103629. 1 | GALNT17      | XLOC_103527 | 260 coding  | noncoding | noncoding | noncoding |
| MSTRG. 103609. 1 |              | XLOC_103530 | 295 coding  | noncoding | noncoding | noncoding |
| MSTRG. 103640. 1 | CALN1        | XLOC_103531 | 290 coding  | noncoding | noncoding | noncoding |
| MSTRG. 103643. 1 | CALN1        | XLOC_103533 | 342 coding  | noncoding | noncoding | noncoding |
| MSTRG. 103653. 1 | CALN1        | XLOC_103538 | 441 coding  | noncoding | noncoding | noncoding |
| MSTRG. 103659. 1 | CALN1        | XLOC_103543 | 261 coding  | noncoding | noncoding | noncoding |
| MSTRG. 103611. 1 |              | XLOC_103546 | 301 coding  | noncoding | noncoding | noncoding |
| MSTRG. 103667. 1 | SBDSP1       | XLOC_103556 | 269 coding  | noncoding | noncoding | noncoding |
| MSTRG. 103664. 1 |              | XLOC_103557 | 248 coding  | noncoding | noncoding | noncoding |
| MSTRG. 103811. 1 | TRIM74       | XLOC_103564 | 221 coding  | noncoding | noncoding | noncoding |
| MSTRG. 103690. 1 |              | XLOC_103571 | 228 coding  | noncoding | noncoding | noncoding |
| MSTRG. 103695. 1 |              | XLOC_103576 | 224 coding  | noncoding | noncoding | noncoding |
| MSTRG. 103705. 1 |              | XLOC_103577 | 283 coding  | noncoding | noncoding | noncoding |
| MSTRG. 103739. 1 | STX1A        | XLOC_103589 | 266 coding  | noncoding | noncoding | noncoding |
| MSTRG. 103717. 1 | CLDN3        | XLOC_103595 | 216 coding  | coding    | noncoding | noncoding |
| MSTRG. 103719. 1 |              | XLOC_103596 | 433 coding  | noncoding | noncoding | noncoding |
| MSTRG. 103721. 1 |              | XLOC_103601 | 237 coding  | noncoding | noncoding | noncoding |
| MSTRG. 103728. 1 |              | XLOC_103602 | 296 coding  | noncoding | noncoding | noncoding |
| MSTRG. 103730. 1 |              | XLOC_103603 | 287 coding  | noncoding | noncoding | noncoding |
| MSTRG. 103752. 1 |              | XLOC_103604 | 225 coding  | noncoding | coding    | noncoding |
| MSTRG. 103754. 1 |              | XLOC_103606 | 295 coding  | noncoding | noncoding | noncoding |
| MSTRG. 103747. 1 |              | XLOC_103607 | 288 coding  | noncoding | noncoding | noncoding |
| MSTRG. 103766. 1 |              | XLOC_103615 | 261 coding  | noncoding | noncoding | noncoding |
| NM_032421. 3     | CLIP2        | XLOC_103617 | 5518 coding | coding    | coding    | coding    |
| MSTRG. 103791. 1 | GTF2IRD1     | XLOC_103620 | 238 coding  | noncoding | coding    | noncoding |
| MSTRG. 103796. 1 | GTF2IRD1     | XLOC_103622 | 346 coding  | noncoding | noncoding | noncoding |

|                  |              |             |             |           |           |           |
|------------------|--------------|-------------|-------------|-----------|-----------|-----------|
| MSTRG. 103843. 1 |              | XLOC_103643 | 282 coding  | noncoding | noncoding | noncoding |
| NM_001145064. 3  | CASTOR2      | XLOC_103646 | 8100 coding | coding    | coding    | coding    |
| MSTRG. 103856. 1 | CASTOR2      | XLOC_103648 | 241 coding  | noncoding | noncoding | noncoding |
| MSTRG. 103920. 1 | HIP1         | XLOC_103678 | 238 coding  | noncoding | noncoding | noncoding |
| MSTRG. 103933. 1 | HIP1         | XLOC_103688 | 247 coding  | noncoding | noncoding | noncoding |
| MSTRG. 103945. 1 | HIP1         | XLOC_103698 | 356 coding  | noncoding | noncoding | noncoding |
| MSTRG. 103905. 1 |              | XLOC_103699 | 284 coding  | noncoding | noncoding | noncoding |
| MSTRG. 103909. 1 |              | XLOC_103702 | 494 coding  | noncoding | noncoding | noncoding |
| XM_024446844. 1  | RHBDD2       | XLOC_103703 | 2621 coding | coding    | coding    | coding    |
| MSTRG. 103948. 1 |              | XLOC_103716 | 219 coding  | noncoding | noncoding | noncoding |
| MSTRG. 103954. 1 |              | XLOC_103717 | 212 coding  | noncoding | noncoding | noncoding |
| MSTRG. 103959. 1 | SRRM3        | XLOC_103721 | 347 coding  | noncoding | noncoding | noncoding |
| MSTRG. 103962. 1 | SRRM3        | XLOC_103723 | 333 coding  | noncoding | noncoding | noncoding |
| MSTRG. 103963. 1 | SRRM3        | XLOC_103724 | 233 coding  | noncoding | noncoding | noncoding |
| XM_017011729. 2  | DTX2         | XLOC_103730 | 2064 coding | coding    | coding    | coding    |
| MSTRG. 104736. 1 | DTX2         | XLOC_103731 | 291 coding  | noncoding | noncoding | noncoding |
| MSTRG. 104754. 1 | LOC100133091 | XLOC_103745 | 270 coding  | noncoding | noncoding | noncoding |
| MSTRG. 104766. 1 |              | XLOC_103749 | 392 coding  | noncoding | noncoding | noncoding |
| MSTRG. 104768. 1 |              | XLOC_103750 | 253 coding  | noncoding | noncoding | noncoding |
| NM_001127360. 1  | PHTF2        | XLOC_103823 | 2625 coding | coding    | noncoding | coding    |
| MSTRG. 104361. 1 | MAGI2        | XLOC_103839 | 308 coding  | noncoding | noncoding | noncoding |
| MSTRG. 104367. 1 | MAGI2        | XLOC_103843 | 294 coding  | noncoding | noncoding | noncoding |
| MSTRG. 104382. 1 | MAGI2        | XLOC_103851 | 279 coding  | noncoding | coding    | noncoding |
| MSTRG. 104305. 1 |              | XLOC_103869 | 285 coding  | noncoding | noncoding | noncoding |
| MSTRG. 104430. 1 |              | XLOC_103900 | 350 coding  | noncoding | noncoding | noncoding |
| MSTRG. 104439. 1 |              | XLOC_103904 | 460 coding  | noncoding | coding    | coding    |
| MSTRG. 104526. 1 | CACNA2D1     | XLOC_103928 | 445 coding  | noncoding | noncoding | noncoding |
| MSTRG. 104530. 1 | CACNA2D1     | XLOC_103930 | 261 coding  | noncoding | noncoding | noncoding |
| MSTRG. 104500. 1 |              | XLOC_103933 | 288 coding  | noncoding | noncoding | noncoding |
| MSTRG. 104508. 1 |              | XLOC_103938 | 277 coding  | coding    | noncoding | noncoding |
| MSTRG. 104575. 1 |              | XLOC_103971 | 268 coding  | coding    | noncoding | noncoding |
| MSTRG. 104607. 1 |              | XLOC_103980 | 343 coding  | noncoding | noncoding | noncoding |
| MSTRG. 104629. 1 |              | XLOC_103986 | 315 coding  | noncoding | noncoding | noncoding |
| XM_017012865. 2  | DMTF1        | XLOC_104030 | 5077 coding | coding    | coding    | coding    |
| MSTRG. 105038. 1 | ABCB4        | XLOC_104076 | 391 coding  | coding    | noncoding | noncoding |
| XM_006716028. 4  | ADAM22       | XLOC_104084 | 6906 coding | coding    | coding    | coding    |
| MSTRG. 104856. 1 |              | XLOC_104095 | 288 coding  | noncoding | noncoding | noncoding |
| MSTRG. 104885. 1 |              | XLOC_104109 | 231 coding  | noncoding | noncoding | noncoding |
| MSTRG. 104951. 1 | ZNF804B      | XLOC_104119 | 223 coding  | noncoding | noncoding | noncoding |
| MSTRG. 104954. 1 | ZNF804B      | XLOC_104121 | 281 coding  | noncoding | noncoding | noncoding |
| MSTRG. 104956. 1 | ZNF804B      | XLOC_104123 | 253 coding  | coding    | noncoding | noncoding |
| MSTRG. 104960. 1 |              | XLOC_104126 | 215 coding  | noncoding | noncoding | noncoding |
| MSTRG. 104968. 1 |              | XLOC_104130 | 222 coding  | noncoding | noncoding | noncoding |

|                  |              |             |              |           |           |           |
|------------------|--------------|-------------|--------------|-----------|-----------|-----------|
| MSTRG. 104962. 1 |              | XLOC_104131 | 209 coding   | noncoding | noncoding | noncoding |
| MSTRG. 104975. 1 | STEAP2-AS1   | XLOC_104132 | 310 coding   | noncoding | noncoding | noncoding |
| MSTRG. 105075. 1 |              | XLOC_104155 | 359 coding   | noncoding | noncoding | noncoding |
| MSTRG. 104997. 1 |              | XLOC_104159 | 200 coding   | noncoding | noncoding | noncoding |
| MSTRG. 105002. 1 |              | XLOC_104160 | 316 coding   | noncoding | noncoding | noncoding |
| NM_012395. 3     | CDK14        | XLOC_104163 | 4954 coding  | coding    | coding    | coding    |
| NM_003505. 2     | FZD1         | XLOC_104216 | 6894 coding  | coding    | coding    | coding    |
| MSTRG. 105107. 1 |              | XLOC_104228 | 237 coding   | noncoding | noncoding | noncoding |
| MSTRG. 105234. 1 | LRRD1        | XLOC_104274 | 323 coding   | noncoding | noncoding | noncoding |
| MSTRG. 105224. 1 |              | XLOC_104282 | 285 coding   | noncoding | noncoding | noncoding |
| MSTRG. 105227. 1 | TMBIM7P      | XLOC_104283 | 401 coding   | noncoding | noncoding | noncoding |
| MSTRG. 105275. 1 |              | XLOC_104294 | 295 coding   | noncoding | noncoding | noncoding |
| MSTRG. 105276. 1 |              | XLOC_104295 | 259 coding   | noncoding | noncoding | noncoding |
| MSTRG. 105360. 1 |              | XLOC_104330 | 239 coding   | noncoding | noncoding | noncoding |
| MSTRG. 105468. 1 | LOC105375404 | XLOC_104337 | 296 coding   | noncoding | noncoding | noncoding |
| MSTRG. 105398. 1 |              | XLOC_104361 | 295 coding   | noncoding | noncoding | noncoding |
| XM_011516383. 1  | PPP1R9A      | XLOC_104362 | 10625 coding | coding    | coding    | coding    |
| MSTRG. 105421. 1 | PPP1R9A      | XLOC_104364 | 365 coding   | noncoding | noncoding | noncoding |
| MSTRG. 105422. 1 | PPP1R9A      | XLOC_104365 | 233 coding   | noncoding | noncoding | noncoding |
| MSTRG. 105433. 1 | PPP1R9A      | XLOC_104366 | 304 coding   | noncoding | noncoding | noncoding |
| MSTRG. 105439. 1 | LOC105375405 | XLOC_104367 | 312 coding   | noncoding | noncoding | noncoding |
| MSTRG. 105411. 1 |              | XLOC_104374 | 242 coding   | noncoding | noncoding | noncoding |
| MSTRG. 105412. 1 |              | XLOC_104375 | 254 coding   | noncoding | noncoding | noncoding |
| MSTRG. 105414. 1 |              | XLOC_104376 | 257 coding   | noncoding | noncoding | noncoding |
| NM_016116. 3     | ASB4         | XLOC_104379 | 3784 coding  | coding    | coding    | coding    |
| MSTRG. 105531. 1 |              | XLOC_104411 | 211 coding   | noncoding | noncoding | noncoding |
| MSTRG. 105537. 1 |              | XLOC_104413 | 239 coding   | noncoding | noncoding | noncoding |
| MSTRG. 105543. 1 |              | XLOC_104416 | 229 coding   | noncoding | noncoding | noncoding |
| MSTRG. 105552. 1 |              | XLOC_104424 | 276 coding   | noncoding | noncoding | noncoding |
| MSTRG. 105553. 1 |              | XLOC_104425 | 323 coding   | noncoding | noncoding | noncoding |
| MSTRG. 105563. 1 |              | XLOC_104433 | 264 coding   | noncoding | noncoding | noncoding |
| MSTRG. 105564. 1 |              | XLOC_104434 | 563 coding   | noncoding | noncoding | noncoding |
| MSTRG. 105573. 1 |              | XLOC_104435 | 288 coding   | noncoding | noncoding | noncoding |
| MSTRG. 105575. 1 |              | XLOC_104436 | 265 coding   | noncoding | noncoding | noncoding |
| MSTRG. 105576. 1 |              | XLOC_104437 | 287 coding   | noncoding | noncoding | noncoding |
| MSTRG. 105587. 1 | LOC105375416 | XLOC_104441 | 227 coding   | noncoding | noncoding | noncoding |
| MSTRG. 105593. 1 | LOC105375416 | XLOC_104444 | 281 coding   | noncoding | noncoding | noncoding |
| MSTRG. 105582. 1 |              | XLOC_104446 | 251 coding   | noncoding | noncoding | noncoding |
| MSTRG. 105597. 1 |              | XLOC_104448 | 300 coding   | coding    | noncoding | noncoding |
| MSTRG. 105708. 1 | LMTK2        | XLOC_104454 | 285 coding   | noncoding | noncoding | noncoding |
| MSTRG. 105723. 1 | TECPR1       | XLOC_104469 | 2934 coding  | noncoding | coding    | noncoding |
| MSTRG. 105729. 1 |              | XLOC_104473 | 297 coding   | noncoding | noncoding | noncoding |
| MSTRG. 105742. 1 | BAIAP2L1     | XLOC_104479 | 875 coding   | coding    | noncoding | coding    |

|                |                            |             |              |           |           |           |
|----------------|----------------------------|-------------|--------------|-----------|-----------|-----------|
| MSTRG.105677.1 |                            | XLOC_104480 | 315 coding   | noncoding | noncoding | noncoding |
| MSTRG.105681.1 |                            | XLOC_104481 | 397 coding   | noncoding | noncoding | noncoding |
| MSTRG.105685.1 |                            | XLOC_104483 | 277 coding   | noncoding | noncoding | noncoding |
| MSTRG.105694.1 |                            | XLOC_104490 | 260 coding   | noncoding | noncoding | noncoding |
| MSTRG.105697.1 |                            | XLOC_104492 | 290 coding   | noncoding | noncoding | noncoding |
| MSTRG.105786.1 | TRRAP                      | XLOC_104498 | 255 coding   | noncoding | noncoding | noncoding |
| XM_006715826.2 | ARPC1B                     | XLOC_104511 | 1687 coding  | coding    | coding    | coding    |
| NM_001318162.1 | CPSF4                      | XLOC_104513 | 1730 coding  | coding    | coding    | coding    |
| MSTRG.105782.2 | ATP5MF-PTCD1               | XLOC_104514 | 453 coding   | coding    | noncoding | noncoding |
| MSTRG.105766.1 | ZKSCAN5                    | XLOC_104519 | 275 coding   | noncoding | noncoding | noncoding |
| MSTRG.105841.1 | CYP3A7-CYP3A51P            | XLOC_104539 | 249 coding   | noncoding | noncoding | noncoding |
| MSTRG.105829.1 | CYP3A43                    | XLOC_104545 | 254 coding   | noncoding | noncoding | noncoding |
| MSTRG.105858.1 |                            | XLOC_104557 | 251 coding   | noncoding | noncoding | noncoding |
| MSTRG.105891.1 | ZKSCAN1                    | XLOC_104562 | 301 coding   | noncoding | noncoding | noncoding |
| NM_004722.4    | AP4M1                      | XLOC_104567 | 3591 coding  | coding    | coding    | coding    |
| MSTRG.105903.2 | CNPY4                      | XLOC_104568 | 510 coding   | coding    | noncoding | noncoding |
| MSTRG.105873.1 |                            | XLOC_104571 | 305 coding   | noncoding | noncoding | noncoding |
| MSTRG.106043.1 | STAG3L5P-PVRIG2P<br>-PILRB | XLOC_104585 | 293 coding   | noncoding | noncoding | noncoding |
| MSTRG.105912.1 | LOC107986829               | XLOC_104603 | 312 coding   | noncoding | noncoding | noncoding |
| MSTRG.105914.1 | LOC107986829               | XLOC_104604 | 288 coding   | noncoding | noncoding | noncoding |
| MSTRG.105907.1 |                            | XLOC_104605 | 229 coding   | noncoding | noncoding | noncoding |
| MSTRG.105920.1 | AGFG2                      | XLOC_104607 | 284 coding   | noncoding | noncoding | noncoding |
| MSTRG.105944.1 | PCOLCE-AS1                 | XLOC_104610 | 200 coding   | noncoding | noncoding | noncoding |
| MSTRG.105933.1 | LOC105375429               | XLOC_104618 | 239 coding   | noncoding | noncoding | noncoding |
| NM_005273.4    | GNB2                       | XLOC_104619 | 1664 coding  | coding    | coding    | coding    |
| MSTRG.105953.1 |                            | XLOC_104625 | 232 coding   | noncoding | noncoding | noncoding |
| NR_111917.1    | ZAN                        | XLOC_104626 | 8734 coding  | coding    | noncoding | coding    |
| MSTRG.105965.1 | EPHB4                      | XLOC_104630 | 459 coding   | coding    | coding    | noncoding |
| XM_006716055.3 | SLC12A9                    | XLOC_104631 | 3020 coding  | coding    | coding    | coding    |
| MSTRG.105969.1 | SLC12A9-AS1                | XLOC_104632 | 228 coding   | noncoding | noncoding | noncoding |
| MSTRG.105983.2 | MUC12                      | XLOC_104643 | 435 coding   | noncoding | noncoding | noncoding |
| NM_001040105.2 | MUC17                      | XLOC_104645 | 14352 coding | coding    | noncoding | coding    |
| MSTRG.105999.1 |                            | XLOC_104646 | 253 coding   | noncoding | noncoding | noncoding |
| MSTRG.105998.1 |                            | XLOC_104647 | 227 coding   | noncoding | noncoding | noncoding |
| MSTRG.106004.1 |                            | XLOC_104651 | 361 coding   | noncoding | noncoding | noncoding |
| MSTRG.106017.1 |                            | XLOC_104656 | 293 coding   | noncoding | noncoding | noncoding |
| MSTRG.106026.1 |                            | XLOC_104663 | 440 coding   | noncoding | noncoding | noncoding |
| MSTRG.106078.1 | COL26A1                    | XLOC_104670 | 396 coding   | noncoding | noncoding | noncoding |
| MSTRG.106084.1 | COL26A1                    | XLOC_104674 | 259 coding   | noncoding | noncoding | noncoding |
| MSTRG.106060.1 |                            | XLOC_104681 | 227 coding   | noncoding | noncoding | noncoding |
| MSTRG.106061.1 |                            | XLOC_104684 | 303 coding   | noncoding | noncoding | noncoding |
| MSTRG.106098.1 | CUX1                       | XLOC_104691 | 215 coding   | noncoding | noncoding | noncoding |

|                   |              |             |             |           |           |           |
|-------------------|--------------|-------------|-------------|-----------|-----------|-----------|
| MSTRG. 106110. 1  | CUX1         | XLOC_104703 | 260 coding  | noncoding | noncoding | noncoding |
| MSTRG. 106111. 1  | CUX1         | XLOC_104704 | 232 coding  | noncoding | noncoding | noncoding |
| MSTRG. 106113. 1  | CUX1         | XLOC_104705 | 253 coding  | noncoding | noncoding | noncoding |
| MSTRG. 106600. 1  | LOC107986717 | XLOC_104713 | 294 coding  | noncoding | noncoding | noncoding |
| MSTRG. 106629. 1  | POLR2J3      | XLOC_104724 | 648 coding  | noncoding | noncoding | noncoding |
| MSTRG. 106173. 1  | SLC26A5      | XLOC_104765 | 254 coding  | noncoding | noncoding | noncoding |
| MSTRG. 106175. 1  | SLC26A5      | XLOC_104767 | 345 coding  | noncoding | noncoding | noncoding |
| MSTRG. 106177. 1  | SLC26A5      | XLOC_104769 | 265 coding  | noncoding | noncoding | noncoding |
| MSTRG. 106148. 1  | LHFPL3       | XLOC_104795 | 270 coding  | noncoding | noncoding | noncoding |
| MSTRG. 106153. 1  | LHFPL3       | XLOC_104797 | 267 coding  | noncoding | noncoding | noncoding |
| MSTRG. 106156. 1  | LHFPL3       | XLOC_104798 | 203 coding  | noncoding | noncoding | noncoding |
| MSTRG. 106167. 1  | LHFPL3-AS2   | XLOC_104805 | 282 coding  | noncoding | noncoding | noncoding |
| XM_011516400. 2   | KMT2E        | XLOC_104806 | 7985 coding | coding    | coding    | coding    |
| MSTRG. 106432. 19 | SRPK2        | XLOC_104806 | 3115 coding | coding    | noncoding | coding    |
| MSTRG. 106441. 1  | SRPK2        | XLOC_104810 | 2973 coding | noncoding | noncoding | noncoding |
| MSTRG. 106225. 1  |              | XLOC_104842 | 281 coding  | noncoding | noncoding | noncoding |
| MSTRG. 106229. 1  |              | XLOC_104845 | 298 coding  | noncoding | noncoding | noncoding |
| MSTRG. 106257. 1  |              | XLOC_104893 | 247 coding  | noncoding | noncoding | noncoding |
| NM_002649. 3      | PIK3CG       | XLOC_104894 | 7210 coding | coding    | coding    | coding    |
| XM_011516056. 3   | GPR22        | XLOC_104910 | 3587 coding | coding    | noncoding | coding    |
| MSTRG. 106430. 1  | LAMB1        | XLOC_104936 | 221 coding  | noncoding | noncoding | noncoding |
| MSTRG. 106469. 1  | LOC107986836 | XLOC_104989 | 375 coding  | noncoding | noncoding | noncoding |
| MSTRG. 106472. 1  |              | XLOC_104990 | 281 coding  | noncoding | noncoding | noncoding |
| MSTRG. 106542. 1  |              | XLOC_104992 | 214 coding  | noncoding | noncoding | noncoding |
| MSTRG. 106584. 1  | LOC105375451 | XLOC_105014 | 231 coding  | noncoding | noncoding | noncoding |
| MSTRG. 106591. 1  |              | XLOC_105127 | 292 coding  | noncoding | noncoding | noncoding |
| MSTRG. 106699. 1  |              | XLOC_105128 | 217 coding  | noncoding | noncoding | noncoding |
| MSTRG. 106730. 1  | LOC101928012 | XLOC_105179 | 287 coding  | noncoding | noncoding | noncoding |
| MSTRG. 106776. 1  |              | XLOC_105197 | 234 coding  | noncoding | noncoding | noncoding |
| MSTRG. 106794. 1  |              | XLOC_105205 | 241 coding  | coding    | noncoding | noncoding |
| MSTRG. 106853. 1  | FOXP2        | XLOC_105216 | 263 coding  | noncoding | noncoding | noncoding |
| MSTRG. 106854. 1  | FOXP2        | XLOC_105217 | 253 coding  | noncoding | noncoding | noncoding |
| MSTRG. 106830. 1  |              | XLOC_105231 | 309 coding  | noncoding | noncoding | noncoding |
| MSTRG. 106836. 1  |              | XLOC_105234 | 213 coding  | noncoding | noncoding | noncoding |
| MSTRG. 106837. 1  |              | XLOC_105235 | 260 coding  | noncoding | noncoding | noncoding |
| MSTRG. 106840. 1  |              | XLOC_105236 | 290 coding  | noncoding | noncoding | noncoding |
| MSTRG. 106950. 1  |              | XLOC_105264 | 324 coding  | coding    | noncoding | noncoding |
| MSTRG. 106972. 1  |              | XLOC_105278 | 298 coding  | noncoding | noncoding | noncoding |
| MSTRG. 107009. 1  |              | XLOC_105282 | 255 coding  | noncoding | noncoding | noncoding |
| MSTRG. 107050. 1  | LOC105375463 | XLOC_105317 | 323 coding  | noncoding | noncoding | noncoding |
| NM_001206748. 2   | CAV2         | XLOC_105325 | 2973 coding | coding    | coding    | noncoding |
| MSTRG. 107092. 1  | MET          | XLOC_105331 | 389 coding  | noncoding | noncoding | noncoding |
| MSTRG. 107214. 1  | ST7          | XLOC_105354 | 307 coding  | noncoding | noncoding | noncoding |

|                |              |             |             |           |           |           |
|----------------|--------------|-------------|-------------|-----------|-----------|-----------|
| MSTRG.107218.1 | ST7          | XLOC_105357 | 237 coding  | noncoding | noncoding | noncoding |
| MSTRG.107136.1 | CFTR-AS1     | XLOC_105374 | 212 coding  | noncoding | noncoding | noncoding |
| MSTRG.107192.1 | LOC102724495 | XLOC_105404 | 216 coding  | noncoding | noncoding | noncoding |
| MSTRG.107195.1 |              | XLOC_105406 | 223 coding  | noncoding | noncoding | noncoding |
| XR_001745344.1 | LOC105375472 | XLOC_105408 | 7135 coding | noncoding | noncoding | noncoding |
| MSTRG.107239.1 |              | XLOC_105418 | 241 coding  | noncoding | noncoding | noncoding |
| MSTRG.107225.1 |              | XLOC_105420 | 247 coding  | noncoding | noncoding | noncoding |
| MSTRG.107247.1 |              | XLOC_105426 | 305 coding  | noncoding | coding    | noncoding |
| MSTRG.107301.1 | LINC02476    | XLOC_105448 | 297 coding  | noncoding | noncoding | noncoding |
| MSTRG.107271.1 |              | XLOC_105452 | 292 coding  | noncoding | noncoding | noncoding |
| MSTRG.107274.1 |              | XLOC_105453 | 269 coding  | noncoding | noncoding | noncoding |
| MSTRG.107279.1 |              | XLOC_105456 | 204 coding  | noncoding | noncoding | noncoding |
| XM_011516165.3 | KCND2        | XLOC_105461 | 5957 coding | coding    | coding    | coding    |
| MSTRG.107311.1 |              | XLOC_105473 | 262 coding  | noncoding | noncoding | noncoding |
| MSTRG.107346.1 |              | XLOC_105555 | 217 coding  | noncoding | noncoding | noncoding |
| MSTRG.107382.1 |              | XLOC_105571 | 322 coding  | noncoding | noncoding | noncoding |
| NR_036484.1    | FEZF1-AS1    | XLOC_105575 | 2653 coding | noncoding | coding    | noncoding |
| MSTRG.107692.1 | CADPS2       | XLOC_105583 | 231 coding  | noncoding | noncoding | noncoding |
| MSTRG.107674.1 |              | XLOC_105590 | 310 coding  | coding    | noncoding | noncoding |
| MSTRG.107710.1 |              | XLOC_105594 | 226 coding  | noncoding | noncoding | noncoding |
| MSTRG.107739.1 | HYAL4        | XLOC_105615 | 250 coding  | noncoding | noncoding | noncoding |
| MSTRG.107743.1 | HYAL4        | XLOC_105617 | 272 coding  | noncoding | noncoding | noncoding |
| NR_133947.1    | LOC105375483 | XLOC_105620 | 1741 coding | noncoding | noncoding | noncoding |
| MSTRG.107779.1 |              | XLOC_105636 | 291 coding  | noncoding | noncoding | noncoding |
| MSTRG.107877.1 | GRM8         | XLOC_105667 | 254 coding  | noncoding | noncoding | noncoding |
| MSTRG.107881.1 | GRM8         | XLOC_105669 | 258 coding  | noncoding | noncoding | noncoding |
| MSTRG.107847.1 |              | XLOC_105685 | 206 coding  | noncoding | noncoding | noncoding |
| MSTRG.107917.6 | ZNF800       | XLOC_105688 | 2262 coding | coding    | coding    | coding    |
| MSTRG.107938.1 |              | XLOC_105701 | 236 coding  | noncoding | noncoding | noncoding |
| MSTRG.108058.4 | LRRC4        | XLOC_105702 | 2643 coding | coding    | coding    | coding    |
| MSTRG.107973.1 |              | XLOC_105726 | 291 coding  | noncoding | noncoding | noncoding |
| MSTRG.108026.1 |              | XLOC_105757 | 282 coding  | noncoding | noncoding | noncoding |
| MSTRG.108029.1 |              | XLOC_105759 | 214 coding  | noncoding | noncoding | noncoding |
| NM_178562.5    | TSPAN33      | XLOC_105763 | 2951 coding | coding    | coding    | coding    |
| XM_017011907.1 | AHCYL2       | XLOC_105766 | 4767 coding | coding    | coding    | coding    |
| MSTRG.108146.1 | AHCYL2       | XLOC_105778 | 259 coding  | noncoding | noncoding | noncoding |
| MSTRG.108150.1 | AHCYL2       | XLOC_105782 | 450 coding  | noncoding | noncoding | noncoding |
| MSTRG.108158.1 |              | XLOC_105788 | 288 coding  | noncoding | noncoding | noncoding |
| MSTRG.108159.1 |              | XLOC_105789 | 226 coding  | noncoding | noncoding | noncoding |
| MSTRG.108161.1 |              | XLOC_105790 | 656 coding  | noncoding | noncoding | noncoding |
| MSTRG.108111.1 |              | XLOC_105823 | 246 coding  | noncoding | noncoding | noncoding |
| MSTRG.108112.1 |              | XLOC_105824 | 233 coding  | noncoding | noncoding | noncoding |
| MSTRG.108114.1 | CPA2         | XLOC_105826 | 245 coding  | noncoding | noncoding | noncoding |

|                   |              |             |              |           |           |           |
|-------------------|--------------|-------------|--------------|-----------|-----------|-----------|
| MSTRG. 108521. 5  | LINC-PINT    | XLOC_105841 | 3105 coding  | noncoding | noncoding | noncoding |
| MSTRG. 108521. 14 | LINC-PINT    | XLOC_105841 | 4322 coding  | noncoding | coding    | noncoding |
| MSTRG. 108641. 1  | PODXL        | XLOC_105896 | 330 coding   | noncoding | noncoding | noncoding |
| MSTRG. 108212. 1  |              | XLOC_105904 | 223 coding   | coding    | noncoding | noncoding |
| MSTRG. 108314. 1  |              | XLOC_105979 | 255 coding   | noncoding | noncoding | noncoding |
| MSTRG. 108490. 1  | EXOC4        | XLOC_106056 | 306 coding   | coding    | noncoding | noncoding |
| MSTRG. 108387. 1  | AKR1B10      | XLOC_106086 | 276 coding   | noncoding | noncoding | noncoding |
| XR_927537. 3      | CALD1        | XLOC_106105 | 5025 coding  | coding    | coding    | coding    |
| NM_001130929. 2   | STMP1        | XLOC_106179 | 2461 coding  | coding    | coding    | coding    |
| MSTRG. 108662. 1  | FAM180A      | XLOC_106182 | 239 coding   | noncoding | noncoding | noncoding |
| MSTRG. 108663. 1  | FAM180A      | XLOC_106183 | 235 coding   | coding    | noncoding | noncoding |
| MSTRG. 108665. 1  | FAM180A      | XLOC_106184 | 304 coding   | noncoding | noncoding | noncoding |
| MSTRG. 108784. 1  |              | XLOC_106215 | 229 coding   | noncoding | noncoding | noncoding |
| MSTRG. 108787. 1  |              | XLOC_106218 | 306 coding   | noncoding | noncoding | noncoding |
| NM_001006628. 2   | CHRM2        | XLOC_106221 | 5680 coding  | coding    | coding    | coding    |
| MSTRG. 108794. 1  |              | XLOC_106229 | 649 coding   | noncoding | noncoding | noncoding |
| MSTRG. 108824. 1  | PTN          | XLOC_106235 | 262 coding   | noncoding | noncoding | noncoding |
| MSTRG. 108841. 1  | DGKI         | XLOC_106242 | 238 coding   | noncoding | noncoding | noncoding |
| MSTRG. 108854. 1  | DGKI         | XLOC_106249 | 284 coding   | noncoding | noncoding | noncoding |
| MSTRG. 108870. 1  |              | XLOC_106265 | 285 coding   | noncoding | noncoding | noncoding |
| MSTRG. 108875. 1  | AKR1D1       | XLOC_106267 | 237 coding   | noncoding | noncoding | noncoding |
| MSTRG. 108878. 1  |              | XLOC_106271 | 273 coding   | noncoding | noncoding | noncoding |
| MSTRG. 108882. 1  |              | XLOC_106273 | 526 coding   | noncoding | noncoding | noncoding |
| MSTRG. 108886. 1  |              | XLOC_106275 | 251 coding   | noncoding | noncoding | noncoding |
| MSTRG. 108890. 1  |              | XLOC_106277 | 267 coding   | noncoding | noncoding | noncoding |
| MSTRG. 108892. 1  |              | XLOC_106278 | 309 coding   | noncoding | noncoding | noncoding |
| MSTRG. 108940. 1  | TRIM24       | XLOC_106281 | 445 coding   | noncoding | noncoding | noncoding |
| MSTRG. 108903. 1  |              | XLOC_106293 | 312 coding   | noncoding | noncoding | noncoding |
| XM_005250167. 3   | TMEM213      | XLOC_106295 | 4629 coding  | coding    | coding    | coding    |
| NM_001318333. 2   | TTC26        | XLOC_106312 | 4460 coding  | coding    | coding    | coding    |
| XM_011516003. 2   | UBN2         | XLOC_106313 | 6930 coding  | coding    | coding    | coding    |
| MSTRG. 109064. 1  |              | XLOC_106327 | 323 coding   | coding    | noncoding | noncoding |
| MSTRG. 109095. 1  |              | XLOC_106391 | 239 coding   | noncoding | noncoding | noncoding |
| MSTRG. 109103. 1  |              | XLOC_106397 | 533 coding   | noncoding | noncoding | noncoding |
| MSTRG. 109111. 1  | DENND2A      | XLOC_106398 | 281 coding   | noncoding | noncoding | noncoding |
| MSTRG. 109120. 1  | LOC105375536 | XLOC_106416 | 315 coding   | noncoding | noncoding | noncoding |
| XM_011515705. 2   | TMEM178B     | XLOC_106422 | 2972 coding  | coding    | coding    | coding    |
| NM_001195278. 2   | TMEM178B     | XLOC_106422 | 10726 coding | coding    | coding    | coding    |
| MSTRG. 109164. 1  | TMEM178B     | XLOC_106423 | 207 coding   | noncoding | noncoding | noncoding |
| MSTRG. 109170. 1  | TMEM178B     | XLOC_106426 | 269 coding   | noncoding | noncoding | noncoding |
| MSTRG. 109176. 1  | TMEM178B     | XLOC_106430 | 239 coding   | noncoding | noncoding | noncoding |
| MSTRG. 109231. 1  |              | XLOC_106447 | 313 coding   | noncoding | noncoding | noncoding |
| MSTRG. 109483. 70 | TRBJ1-2      | XLOC_106467 | 765 coding   | coding    | coding    | noncoding |

|                |              |             |              |           |           |           |
|----------------|--------------|-------------|--------------|-----------|-----------|-----------|
| NM_001143680.1 | GSTK1        | XLOC_106555 | 1022 coding  | coding    | coding    | coding    |
| MSTRG.109593.1 |              | XLOC_106625 | 261 coding   | noncoding | noncoding | noncoding |
| MSTRG.109603.1 |              | XLOC_106628 | 303 coding   | coding    | noncoding | noncoding |
| MSTRG.109615.1 |              | XLOC_106635 | 242 coding   | noncoding | noncoding | noncoding |
| MSTRG.109668.1 | CNTNAP2      | XLOC_106654 | 499 coding   | coding    | noncoding | noncoding |
| MSTRG.109674.1 | CNTNAP2      | XLOC_106658 | 265 coding   | coding    | noncoding | noncoding |
| MSTRG.109682.1 | CNTNAP2      | XLOC_106662 | 573 coding   | noncoding | noncoding | noncoding |
| MSTRG.109703.1 | CNTNAP2      | XLOC_106670 | 243 coding   | noncoding | noncoding | noncoding |
| MSTRG.109632.1 |              | XLOC_106684 | 220 coding   | noncoding | noncoding | noncoding |
| MSTRG.109760.1 | CUL1         | XLOC_106698 | 288 coding   | noncoding | noncoding | noncoding |
| MSTRG.109720.1 |              | XLOC_106714 | 224 coding   | noncoding | noncoding | noncoding |
| XM_011516439.2 | ZNF398       | XLOC_106734 | 5306 coding  | coding    | coding    | coding    |
| MSTRG.109908.5 | ZNF767P      | XLOC_106759 | 832 coding   | coding    | coding    | noncoding |
| MSTRG.109901.4 | ZNF467       | XLOC_106785 | 1811 coding  | coding    | coding    | coding    |
| NM_138434.2    | ZBED6CL      | XLOC_106891 | 2873 coding  | noncoding | coding    | coding    |
| XM_017012081.2 | REPIN1       | XLOC_106897 | 3718 coding  | coding    | coding    | coding    |
| MSTRG.110055.2 | GIMAP6       | XLOC_106922 | 5453 coding  | coding    | coding    | coding    |
| MSTRG.110055.5 | GIMAP6       | XLOC_106922 | 4366 coding  | coding    | coding    | noncoding |
| XM_017011945.1 | AOC1         | XLOC_106943 | 2729 coding  | coding    | coding    | coding    |
| MSTRG.109991.1 | LOC105375567 | XLOC_106944 | 204 coding   | noncoding | noncoding | noncoding |
| MSTRG.110003.1 | KCNH2        | XLOC_106952 | 284 coding   | noncoding | coding    | noncoding |
| MSTRG.110231.1 |              | XLOC_106987 | 276 coding   | noncoding | noncoding | noncoding |
| MSTRG.110495.4 | KMT2C        | XLOC_106999 | 17287 coding | coding    | coding    | coding    |
| MSTRG.110268.1 |              | XLOC_107004 | 398 coding   | noncoding | noncoding | noncoding |
| MSTRG.110270.1 |              | XLOC_107005 | 307 coding   | noncoding | noncoding | noncoding |
| MSTRG.110283.1 | XRCC2        | XLOC_107010 | 258 coding   | noncoding | noncoding | noncoding |
| MSTRG.110354.1 | ACTR3B       | XLOC_107014 | 270 coding   | noncoding | noncoding | noncoding |
| MSTRG.110368.1 | ACTR3B       | XLOC_107018 | 279 coding   | noncoding | noncoding | noncoding |
| MSTRG.110376.1 | ACTR3B       | XLOC_107020 | 252 coding   | noncoding | noncoding | noncoding |
| MSTRG.110314.1 |              | XLOC_107026 | 633 coding   | noncoding | noncoding | noncoding |
| MSTRG.110341.1 |              | XLOC_107036 | 272 coding   | noncoding | noncoding | noncoding |
| NM_130797.4    | DPP6         | XLOC_107042 | 4826 coding  | coding    | coding    | coding    |
| MSTRG.110390.1 | DPP6         | XLOC_107047 | 300 coding   | noncoding | noncoding | noncoding |
| MSTRG.110398.1 | DPP6         | XLOC_107049 | 258 coding   | noncoding | noncoding | noncoding |
| MSTRG.110403.1 | LOC105375582 | XLOC_107052 | 294 coding   | noncoding | noncoding | noncoding |
| MSTRG.110408.1 | DPP6         | XLOC_107055 | 259 coding   | noncoding | noncoding | noncoding |
| MSTRG.110414.1 |              | XLOC_107061 | 302 coding   | noncoding | noncoding | noncoding |
| MSTRG.110424.1 |              | XLOC_107064 | 283 coding   | noncoding | noncoding | noncoding |
| NM_001346592.1 | INSIG1       | XLOC_107073 | 3082 coding  | coding    | coding    | coding    |
| MSTRG.110549.1 |              | XLOC_107137 | 245 coding   | noncoding | noncoding | noncoding |
| MSTRG.110559.1 |              | XLOC_107146 | 216 coding   | noncoding | noncoding | noncoding |
| MSTRG.110543.1 |              | XLOC_107149 | 370 coding   | noncoding | noncoding | noncoding |
| XM_017012818.1 | UBE3C        | XLOC_107174 | 5198 coding  | coding    | coding    | coding    |

|                |              |             |             |           |           |           |
|----------------|--------------|-------------|-------------|-----------|-----------|-----------|
| MSTRG.110652.1 | DNAJB6       | XLOC_107186 | 260 coding  | noncoding | noncoding | noncoding |
| MSTRG.110628.1 |              | XLOC_107193 | 308 coding  | noncoding | noncoding | noncoding |
| MSTRG.110629.1 |              | XLOC_107194 | 276 coding  | noncoding | noncoding | noncoding |
| MSTRG.110632.1 | LOC101927914 | XLOC_107197 | 282 coding  | noncoding | noncoding | noncoding |
| MSTRG.110786.1 | WDR60        | XLOC_107236 | 324 coding  | noncoding | noncoding | noncoding |
| MSTRG.110804.1 | VIPR2        | XLOC_107245 | 307 coding  | noncoding | noncoding | noncoding |
| MSTRG.110813.1 |              | XLOC_107253 | 236 coding  | noncoding | noncoding | noncoding |
| MSTRG.98008.1  | PRKAR1B      | XLOC_107270 | 285 coding  | noncoding | noncoding | noncoding |
| MSTRG.98210.1  | LOC102723758 | XLOC_107309 | 244 coding  | noncoding | noncoding | noncoding |
| MSTRG.98166.1  |              | XLOC_107312 | 430 coding  | noncoding | noncoding | noncoding |
| MSTRG.98224.1  |              | XLOC_107329 | 201 coding  | noncoding | noncoding | noncoding |
| XR_001745051.1 | LNCRI        | XLOC_107333 | 4542 coding | noncoding | coding    | coding    |
| MSTRG.98248.1  | ELFN1        | XLOC_107338 | 260 coding  | noncoding | noncoding | noncoding |
| MSTRG.98235.1  |              | XLOC_107339 | 243 coding  | noncoding | noncoding | noncoding |
| MSTRG.98236.1  |              | XLOC_107340 | 262 coding  | noncoding | noncoding | noncoding |
| MSTRG.98291.1  | MAD1L1       | XLOC_107358 | 203 coding  | noncoding | noncoding | noncoding |
| MSTRG.98263.1  | SNX8         | XLOC_107370 | 334 coding  | noncoding | noncoding | noncoding |
| MSTRG.98265.1  | SNX8         | XLOC_107371 | 220 coding  | noncoding | noncoding | noncoding |
| MSTRG.98309.2  | LFNG         | XLOC_107384 | 3485 coding | coding    | coding    | coding    |
| MSTRG.98315.1  |              | XLOC_107397 | 401 coding  | noncoding | noncoding | noncoding |
| MSTRG.98344.1  | GNA12        | XLOC_107401 | 225 coding  | noncoding | noncoding | noncoding |
| MSTRG.98330.1  |              | XLOC_107403 | 290 coding  | noncoding | noncoding | noncoding |
| MSTRG.98361.1  |              | XLOC_107425 | 293 coding  | noncoding | noncoding | noncoding |
| MSTRG.98362.1  |              | XLOC_107426 | 287 coding  | noncoding | noncoding | noncoding |
| MSTRG.98468.1  | LOC105375132 | XLOC_107430 | 305 coding  | noncoding | noncoding | noncoding |
| MSTRG.98409.1  | FO XK1       | XLOC_107529 | 606 coding  | noncoding | noncoding | noncoding |
| NM_018059.5    | RADIL        | XLOC_107537 | 5736 coding | coding    | coding    | coding    |
| MSTRG.98463.1  | ZNF890P      | XLOC_107556 | 407 coding  | noncoding | noncoding | noncoding |
| MSTRG.98445.1  |              | XLOC_107557 | 431 coding  | noncoding | noncoding | noncoding |
| MSTRG.98606.1  | TNRC18       | XLOC_107560 | 246 coding  | noncoding | noncoding | noncoding |
| MSTRG.98614.1  | TNRC18       | XLOC_107561 | 229 coding  | noncoding | noncoding | noncoding |
| MSTRG.98616.1  | TNRC18       | XLOC_107562 | 467 coding  | noncoding | noncoding | noncoding |
| MSTRG.98639.1  | FSCN1        | XLOC_107577 | 305 coding  | noncoding | noncoding | noncoding |
| MSTRG.98657.1  | RNF216       | XLOC_107593 | 231 coding  | noncoding | noncoding | noncoding |
| MSTRG.98665.2  | LOC107986694 | XLOC_107601 | 1621 coding | coding    | noncoding | noncoding |
| MSTRG.98673.2  | EIF2AK1      | XLOC_107604 | 2271 coding | coding    | coding    | noncoding |
| MSTRG.98636.1  |              | XLOC_107605 | 274 coding  | noncoding | noncoding | noncoding |
| MSTRG.98683.1  | USP42        | XLOC_107607 | 264 coding  | noncoding | noncoding | noncoding |
| MSTRG.98729.1  | DAGLB        | XLOC_107619 | 301 coding  | noncoding | noncoding | noncoding |
| MSTRG.98679.1  |              | XLOC_107621 | 298 coding  | noncoding | noncoding | noncoding |
| MSTRG.98680.1  |              | XLOC_107622 | 224 coding  | noncoding | noncoding | noncoding |
| MSTRG.98676.1  |              | XLOC_107625 | 298 coding  | noncoding | noncoding | noncoding |
| MSTRG.98748.1  | ZNF316       | XLOC_107633 | 1527 coding | coding    | coding    | noncoding |

|                 |              |             |              |           |           |           |
|-----------------|--------------|-------------|--------------|-----------|-----------|-----------|
| MSTRG. 98754. 1 |              | XLOC_107641 | 225 coding   | noncoding | noncoding | noncoding |
| MSTRG. 98765. 1 |              | XLOC_107646 | 235 coding   | noncoding | noncoding | noncoding |
| MSTRG. 98768. 1 |              | XLOC_107648 | 281 coding   | coding    | noncoding | noncoding |
| MSTRG. 98772. 1 |              | XLOC_107650 | 275 coding   | noncoding | noncoding | noncoding |
| XR_002956536. 1 | LOC112267992 | XLOC_107651 | 4423 coding  | coding    | coding    | coding    |
| NR_034022. 1    | LOC100131257 | XLOC_107657 | 21017 coding | coding    | coding    | coding    |
| MSTRG. 98779. 1 |              | XLOC_107658 | 260 coding   | noncoding | noncoding | noncoding |
| MSTRG. 99672. 3 | GLCCI1       | XLOC_107738 | 315 coding   | coding    | noncoding | noncoding |
| MSTRG. 98913. 1 |              | XLOC_107764 | 276 coding   | noncoding | noncoding | noncoding |
| MSTRG. 98915. 1 |              | XLOC_107766 | 347 coding   | noncoding | noncoding | noncoding |
| MSTRG. 99004. 1 | LOC105375149 | XLOC_107789 | 297 coding   | noncoding | noncoding | noncoding |
| XR_001745089. 1 | LOC105375150 | XLOC_107792 | 5824 coding  | noncoding | noncoding | noncoding |
| MSTRG. 99014. 1 | MGC4859      | XLOC_107797 | 278 coding   | noncoding | noncoding | noncoding |
| MSTRG. 99030. 1 |              | XLOC_107799 | 256 coding   | noncoding | noncoding | noncoding |
| MSTRG. 99036. 1 | LOC107986767 | XLOC_107803 | 326 coding   | noncoding | noncoding | noncoding |
| MSTRG. 99049. 1 |              | XLOC_107829 | 243 coding   | noncoding | noncoding | noncoding |
| MSTRG. 99088. 1 | THSD7A       | XLOC_107837 | 300 coding   | noncoding | noncoding | noncoding |
| MSTRG. 99188. 1 | LOC102725191 | XLOC_107872 | 260 coding   | noncoding | noncoding | noncoding |
| MSTRG. 99193. 1 | SCIN         | XLOC_107875 | 223 coding   | coding    | noncoding | noncoding |
| MSTRG. 99198. 1 | SCIN         | XLOC_107878 | 316 coding   | noncoding | noncoding | noncoding |
| MSTRG. 99219. 3 | ARL4A        | XLOC_107880 | 2606 coding  | coding    | noncoding | noncoding |
| MSTRG. 99236. 1 |              | XLOC_107892 | 255 coding   | noncoding | noncoding | noncoding |
| MSTRG. 99259. 1 | LOC107986770 | XLOC_107899 | 289 coding   | noncoding | noncoding | noncoding |
| MSTRG. 99268. 1 | LOC107986770 | XLOC_107905 | 316 coding   | noncoding | noncoding | noncoding |
| MSTRG. 99273. 1 | LOC107986770 | XLOC_107908 | 294 coding   | noncoding | noncoding | noncoding |
| MSTRG. 99308. 1 | DGKB         | XLOC_107924 | 418 coding   | noncoding | noncoding | noncoding |
| MSTRG. 99379. 1 | AGMO         | XLOC_107933 | 348 coding   | noncoding | noncoding | noncoding |
| MSTRG. 99318. 1 | LOC105375167 | XLOC_107978 | 320 coding   | noncoding | noncoding | noncoding |
| MSTRG. 99322. 1 |              | XLOC_107979 | 316 coding   | noncoding | noncoding | noncoding |
| MSTRG. 99329. 1 |              | XLOC_107984 | 263 coding   | noncoding | noncoding | noncoding |
| MSTRG. 99330. 1 |              | XLOC_107985 | 275 coding   | noncoding | noncoding | noncoding |
| MSTRG. 99358. 1 | CRPPA        | XLOC_107989 | 268 coding   | noncoding | noncoding | noncoding |
| MSTRG. 99359. 1 | CRPPA        | XLOC_107990 | 273 coding   | noncoding | noncoding | noncoding |
| MSTRG. 99463. 3 | BZW2         | XLOC_108005 | 1704 coding  | coding    | coding    | noncoding |
| MSTRG. 99504. 1 | KCCAT333     | XLOC_108038 | 430 coding   | coding    | noncoding | noncoding |
| XR_001745108. 1 | LOC105375172 | XLOC_108039 | 7094 coding  | noncoding | noncoding | noncoding |
| XM_024446696. 1 | SNX13        | XLOC_108053 | 7804 coding  | coding    | coding    | coding    |
| MSTRG. 99788. 1 | LOC105379720 | XLOC_108162 | 261 coding   | noncoding | noncoding | noncoding |
| MSTRG. 99782. 1 |              | XLOC_108163 | 278 coding   | coding    | noncoding | noncoding |
| MSTRG. 99791. 1 |              | XLOC_108164 | 201 coding   | noncoding | noncoding | noncoding |
| MSTRG. 99792. 1 |              | XLOC_108173 | 322 coding   | noncoding | noncoding | noncoding |
| MSTRG. 99871. 1 | ABCB5        | XLOC_108188 | 250 coding   | noncoding | noncoding | noncoding |
| MSTRG. 99861. 1 | LINC01162    | XLOC_108194 | 477 coding   | noncoding | noncoding | noncoding |

|                   |              |             |              |           |           |           |
|-------------------|--------------|-------------|--------------|-----------|-----------|-----------|
| MSTRG. 99885. 1   |              | XLOC_108206 | 308 coding   | noncoding | noncoding | noncoding |
| MSTRG. 99890. 1   |              | XLOC_108214 | 276 coding   | noncoding | noncoding | noncoding |
| MSTRG. 99931. 1   | DNAH11       | XLOC_108221 | 259 coding   | noncoding | noncoding | noncoding |
| XR_927091. 3      | LOC102724143 | XLOC_108229 | 4507 coding  | noncoding | coding    | noncoding |
| MSTRG. 99959. 1   | RAPGEF5      | XLOC_108236 | 290 coding   | noncoding | noncoding | noncoding |
| NM_032581. 4      | FAM126A      | XLOC_108261 | 13178 coding | coding    | noncoding | coding    |
| MSTRG. 100035. 1  |              | XLOC_108273 | 231 coding   | noncoding | noncoding | noncoding |
| MSTRG. 100037. 1  |              | XLOC_108274 | 237 coding   | noncoding | noncoding | noncoding |
| MSTRG. 100039. 1  | LOC105375186 | XLOC_108276 | 264 coding   | noncoding | noncoding | noncoding |
| MSTRG. 100071. 1  | NUP42        | XLOC_108280 | 263 coding   | noncoding | noncoding | noncoding |
| MSTRG. 100067. 1  |              | XLOC_108287 | 319 coding   | noncoding | noncoding | noncoding |
| MSTRG. 100120. 1  |              | XLOC_108312 | 292 coding   | coding    | noncoding | noncoding |
| MSTRG. 100190. 1  |              | XLOC_108368 | 275 coding   | noncoding | noncoding | noncoding |
| MSTRG. 100192. 1  |              | XLOC_108369 | 228 coding   | noncoding | noncoding | noncoding |
| MSTRG. 100217. 1  |              | XLOC_108377 | 262 coding   | noncoding | noncoding | noncoding |
| MSTRG. 100256. 1  | LOC105375199 | XLOC_108391 | 281 coding   | noncoding | noncoding | noncoding |
| NM_002137. 4      | HNRNPA2B1    | XLOC_108399 | 3628 coding  | coding    | coding    | coding    |
| MSTRG. 100477. 1  | SKAP2        | XLOC_108456 | 283 coding   | noncoding | noncoding | noncoding |
| MSTRG. 100499. 1  |              | XLOC_108475 | 279 coding   | noncoding | noncoding | noncoding |
| XM_011515343. 3   | HOXA3        | XLOC_108483 | 7765 coding  | coding    | coding    | coding    |
| NM_000522. 5      | HOXA13       | XLOC_108493 | 5015 coding  | coding    | coding    | coding    |
| MSTRG. 100382. 1  | LOC107986733 | XLOC_108497 | 210 coding   | noncoding | noncoding | noncoding |
| MSTRG. 100392. 1  |              | XLOC_108502 | 316 coding   | noncoding | noncoding | noncoding |
| MSTRG. 100681. 1  | CREB5        | XLOC_108528 | 283 coding   | noncoding | noncoding | noncoding |
| MSTRG. 100683. 1  | CREB5        | XLOC_108529 | 239 coding   | noncoding | noncoding | noncoding |
| MSTRG. 100686. 1  | CREB5        | XLOC_108531 | 368 coding   | noncoding | noncoding | noncoding |
| NM_014817. 4      | TRIL         | XLOC_108539 | 4973 coding  | coding    | coding    | coding    |
| MSTRG. 100506. 1  |              | XLOC_108540 | 208 coding   | noncoding | noncoding | noncoding |
| NM_001145513. 1   | SCRN1        | XLOC_108558 | 5276 coding  | coding    | coding    | coding    |
| MSTRG. 100760. 10 | MTURN        | XLOC_108570 | 5915 coding  | coding    | coding    | noncoding |
| MSTRG. 100927. 1  |              | XLOC_108667 | 284 coding   | noncoding | noncoding | noncoding |
| MSTRG. 100929. 1  |              | XLOC_108668 | 330 coding   | noncoding | noncoding | noncoding |
| MSTRG. 100962. 1  | ITPRID1      | XLOC_108674 | 238 coding   | noncoding | noncoding | noncoding |
| XR_001744805. 1   | PDE1C        | XLOC_108675 | 9944 coding  | coding    | coding    | coding    |
| MSTRG. 100973. 1  | PDE1C        | XLOC_108681 | 308 coding   | noncoding | noncoding | noncoding |
| MSTRG. 100977. 1  | PDE1C        | XLOC_108683 | 321 coding   | noncoding | noncoding | noncoding |
| MSTRG. 100982. 1  | PDE1C        | XLOC_108687 | 279 coding   | noncoding | noncoding | noncoding |
| MSTRG. 100996. 1  | RP9P         | XLOC_108722 | 238 coding   | noncoding | noncoding | noncoding |
| MSTRG. 100991. 1  |              | XLOC_108723 | 251 coding   | noncoding | noncoding | noncoding |
| MSTRG. 101331. 10 | BBS9         | XLOC_108737 | 904 coding   | coding    | coding    | noncoding |
| MSTRG. 101165. 1  | BMPER        | XLOC_108809 | 283 coding   | noncoding | noncoding | noncoding |
| MSTRG. 101186. 1  | NPSR1-AS1    | XLOC_108825 | 304 coding   | noncoding | noncoding | noncoding |
| MSTRG. 101200. 1  |              | XLOC_108844 | 297 coding   | noncoding | noncoding | noncoding |

|                   |              |             |             |           |           |           |
|-------------------|--------------|-------------|-------------|-----------|-----------|-----------|
| MSTRG. 101207. 1  |              | XLOC_108848 | 274 coding  | noncoding | noncoding | noncoding |
| XR_001744846. 2   | HERPUD2      | XLOC_108858 | 3225 coding | coding    | coding    | coding    |
| XM_017012106. 1   | AOAH         | XLOC_108889 | 1871 coding | coding    | coding    | coding    |
| XR_001744894. 2   | ELMO1        | XLOC_108963 | 3611 coding | coding    | coding    | coding    |
| MSTRG. 101962. 1  |              | XLOC_109079 | 293 coding  | noncoding | noncoding | noncoding |
| MSTRG. 101465. 1  |              | XLOC_109100 | 251 coding  | noncoding | noncoding | noncoding |
| MSTRG. 101668. 66 | TRG-AS1      | XLOC_109105 | 2203 coding | noncoding | noncoding | noncoding |
| MSTRG. 101507. 1  | POU6F2       | XLOC_109148 | 306 coding  | noncoding | noncoding | noncoding |
| MSTRG. 101543. 1  |              | XLOC_109171 | 263 coding  | noncoding | noncoding | noncoding |
| MSTRG. 101594. 1  |              | XLOC_109178 | 294 coding  | noncoding | noncoding | noncoding |
| MSTRG. 101643. 1  | MPLKIP       | XLOC_109189 | 731 coding  | noncoding | noncoding | noncoding |
| MSTRG. 101986. 1  | SUGCT        | XLOC_109191 | 257 coding  | noncoding | noncoding | noncoding |
| MSTRG. 101987. 1  | SUGCT        | XLOC_109192 | 404 coding  | noncoding | noncoding | noncoding |
| MSTRG. 101708. 1  | LOC105375246 | XLOC_109303 | 246 coding  | noncoding | noncoding | noncoding |
| MSTRG. 101738. 1  | LOC107986788 | XLOC_109315 | 278 coding  | noncoding | noncoding | noncoding |
| NM_000168. 6      | GLI3         | XLOC_109316 | 8405 coding | coding    | coding    | coding    |
| NR_110833. 1      | LINC01448    | XLOC_109343 | 1171 coding | noncoding | noncoding | noncoding |
| NM_001363436. 1   | C7orf25      | XLOC_109352 | 2025 coding | coding    | coding    | coding    |
| MSTRG. 101968. 1  |              | XLOC_109359 | 283 coding  | noncoding | noncoding | noncoding |
| MSTRG. 102119. 1  | HECW1        | XLOC_109369 | 307 coding  | noncoding | noncoding | noncoding |
| NR_146941. 2      | COA1         | XLOC_109371 | 4404 coding | coding    | coding    | noncoding |
| MSTRG. 102124. 1  |              | XLOC_109382 | 427 coding  | coding    | noncoding | noncoding |
| MSTRG. 102141. 1  | URGCP        | XLOC_109385 | 249 coding  | noncoding | noncoding | noncoding |
| MSTRG. 102179. 1  | AEBP1        | XLOC_109398 | 244 coding  | coding    | noncoding | noncoding |
| MSTRG. 102187. 1  |              | XLOC_109407 | 260 coding  | noncoding | noncoding | noncoding |
| MSTRG. 102188. 1  |              | XLOC_109408 | 252 coding  | noncoding | noncoding | noncoding |
| MSTRG. 102229. 1  |              | XLOC_109436 | 287 coding  | noncoding | noncoding | noncoding |
| MSTRG. 102237. 1  |              | XLOC_109442 | 246 coding  | noncoding | noncoding | noncoding |
| MSTRG. 102241. 1  |              | XLOC_109445 | 269 coding  | noncoding | noncoding | noncoding |
| MSTRG. 102321. 5  | CCM2         | XLOC_109466 | 3432 coding | noncoding | coding    | coding    |
| XR_002956415. 1   | NACAD        | XLOC_109468 | 5432 coding | coding    | coding    | coding    |
| MSTRG. 102288. 1  |              | XLOC_109480 | 313 coding  | noncoding | noncoding | noncoding |
| MSTRG. 102302. 1  |              | XLOC_109487 | 250 coding  | noncoding | noncoding | noncoding |
| MSTRG. 102303. 1  |              | XLOC_109488 | 245 coding  | noncoding | noncoding | noncoding |
| MSTRG. 102348. 1  | ADCY1        | XLOC_109492 | 234 coding  | noncoding | noncoding | noncoding |
| MSTRG. 102337. 1  |              | XLOC_109497 | 323 coding  | noncoding | noncoding | noncoding |
| MSTRG. 102409. 1  |              | XLOC_109541 | 203 coding  | noncoding | noncoding | noncoding |
| MSTRG. 102448. 1  |              | XLOC_109563 | 306 coding  | noncoding | noncoding | noncoding |
| MSTRG. 102449. 1  |              | XLOC_109564 | 236 coding  | noncoding | noncoding | noncoding |
| XM_011515476. 2   | TNS3         | XLOC_109569 | 8499 coding | coding    | coding    | coding    |
| MSTRG. 102519. 1  | TNS3         | XLOC_109575 | 483 coding  | coding    | noncoding | noncoding |
| MSTRG. 102465. 1  |              | XLOC_109581 | 254 coding  | noncoding | noncoding | noncoding |
| MSTRG. 102529. 1  |              | XLOC_109625 | 263 coding  | noncoding | noncoding | noncoding |

|                  |              |             |             |           |           |           |
|------------------|--------------|-------------|-------------|-----------|-----------|-----------|
| MSTRG. 102542. 1 |              | XLOC_109630 | 304 coding  | noncoding | noncoding | noncoding |
| MSTRG. 102544. 1 |              | XLOC_109632 | 224 coding  | noncoding | noncoding | noncoding |
| MSTRG. 102602. 1 | ZPBP         | XLOC_109651 | 403 coding  | noncoding | noncoding | noncoding |
| MSTRG. 102603. 1 | ZPBP         | XLOC_109652 | 243 coding  | noncoding | noncoding | noncoding |
| MSTRG. 102606. 1 | SPATA48      | XLOC_109654 | 250 coding  | noncoding | noncoding | noncoding |
| MSTRG. 102589. 1 |              | XLOC_109659 | 227 coding  | noncoding | noncoding | noncoding |
| MSTRG. 102672. 1 | DDC          | XLOC_109670 | 395 coding  | noncoding | noncoding | noncoding |
| XM_017012060. 2  | GRB10        | XLOC_109673 | 7855 coding | coding    | coding    | coding    |
| XM_017012029. 2  | GRB10        | XLOC_109673 | 6043 coding | coding    | coding    | coding    |
| NM_001287438. 3  | COBL         | XLOC_109686 | 3830 coding | coding    | coding    | coding    |
| MSTRG. 102719. 1 | COBL         | XLOC_109692 | 223 coding  | noncoding | noncoding | noncoding |
| MSTRG. 102692. 1 |              | XLOC_109697 | 313 coding  | noncoding | noncoding | noncoding |
| MSTRG. 102728. 1 |              | XLOC_109707 | 249 coding  | noncoding | noncoding | noncoding |
| MSTRG. 102740. 1 |              | XLOC_109715 | 235 coding  | noncoding | noncoding | noncoding |
| MSTRG. 102759. 1 |              | XLOC_109725 | 277 coding  | coding    | noncoding | noncoding |
| MSTRG. 102846. 1 |              | XLOC_109748 | 325 coding  | noncoding | noncoding | noncoding |
| MSTRG. 102847. 1 |              | XLOC_109749 | 251 coding  | noncoding | noncoding | noncoding |
| MSTRG. 102853. 1 |              | XLOC_109751 | 285 coding  | noncoding | noncoding | noncoding |
| MSTRG. 102863. 1 |              | XLOC_109756 | 265 coding  | noncoding | noncoding | noncoding |
| NR_047551. 1     | EGFR-AS1     | XLOC_109771 | 2821 coding | coding    | coding    | noncoding |
| NM_001284284. 1  | VOPP1        | XLOC_109778 | 2928 coding | noncoding | coding    | coding    |
| MSTRG. 103003. 1 | VOPP1        | XLOC_109795 | 601 coding  | noncoding | noncoding | noncoding |
| MSTRG. 102948. 1 |              | XLOC_109805 | 354 coding  | noncoding | noncoding | noncoding |
| MSTRG. 103010. 1 |              | XLOC_109824 | 257 coding  | noncoding | noncoding | noncoding |
| XM_017012928. 2  | LOC107986800 | XLOC_109829 | 2978 coding | coding    | coding    | coding    |
| NR_029420. 1     | LOC650226    | XLOC_109832 | 1667 coding | coding    | noncoding | noncoding |
| MSTRG. 103025. 1 |              | XLOC_109835 | 287 coding  | noncoding | noncoding | noncoding |
| MSTRG. 103051. 1 |              | XLOC_109839 | 301 coding  | noncoding | noncoding | noncoding |
| MSTRG. 103042. 1 |              | XLOC_109841 | 465 coding  | noncoding | noncoding | noncoding |
| NR_130727. 1     | LOC401357    | XLOC_109842 | 3613 coding | coding    | coding    | coding    |
| MSTRG. 103054. 1 |              | XLOC_109847 | 285 coding  | noncoding | noncoding | noncoding |
| MSTRG. 103057. 1 |              | XLOC_109849 | 260 coding  | noncoding | noncoding | noncoding |
| XM_011515610. 2  | ZNF479       | XLOC_109850 | 2379 coding | coding    | coding    | coding    |
| MSTRG. 103064. 1 |              | XLOC_109853 | 369 coding  | noncoding | noncoding | noncoding |
| MSTRG. 103068. 1 |              | XLOC_109856 | 325 coding  | noncoding | noncoding | noncoding |
| MSTRG. 103070. 1 |              | XLOC_109858 | 299 coding  | noncoding | noncoding | noncoding |
| MSTRG. 103081. 1 |              | XLOC_109866 | 268 coding  | noncoding | noncoding | noncoding |
| MSTRG. 103083. 1 | LOC105375302 | XLOC_109867 | 263 coding  | noncoding | noncoding | noncoding |
| MSTRG. 103170. 1 |              | XLOC_109906 | 218 coding  | noncoding | noncoding | noncoding |
| MSTRG. 103181. 1 |              | XLOC_109914 | 291 coding  | noncoding | noncoding | noncoding |
| MSTRG. 103183. 1 |              | XLOC_109915 | 251 coding  | noncoding | noncoding | noncoding |
| MSTRG. 103185. 1 |              | XLOC_109917 | 231 coding  | noncoding | noncoding | noncoding |
| XR_001744922. 1  | LOC105375322 | XLOC_109938 | 2678 coding | noncoding | coding    | noncoding |

|                |              |             |             |           |           |           |
|----------------|--------------|-------------|-------------|-----------|-----------|-----------|
| XM_024446742.1 | ZNF680       | XLOC_109939 | 2926 coding | coding    | coding    | coding    |
| MSTRG.103316.1 |              | XLOC_109970 | 267 coding  | noncoding | noncoding | noncoding |
| MSTRG.103335.1 | CRCP         | XLOC_109980 | 2310 coding | coding    | coding    | noncoding |
| MSTRG.103558.1 |              | XLOC_109992 | 255 coding  | noncoding | noncoding | noncoding |
| MSTRG.103564.2 | GS1-124K5.4  | XLOC_109995 | 420 coding  | noncoding | noncoding | noncoding |
| MSTRG.103565.1 |              | XLOC_109996 | 448 coding  | noncoding | noncoding | noncoding |
| MSTRG.103566.1 |              | XLOC_109997 | 256 coding  | noncoding | noncoding | noncoding |
| MSTRG.103571.1 |              | XLOC_110000 | 272 coding  | noncoding | noncoding | noncoding |
| MSTRG.103577.1 | RABGEF1      | XLOC_110004 | 258 coding  | noncoding | noncoding | noncoding |
| MSTRG.103578.1 | RABGEF1      | XLOC_110005 | 269 coding  | noncoding | noncoding | noncoding |
| MSTRG.103491.1 | TYW1         | XLOC_110023 | 1503 coding | coding    | noncoding | coding    |
| MSTRG.103516.1 |              | XLOC_110028 | 252 coding  | noncoding | noncoding | noncoding |
| MSTRG.103518.1 | PMS2P4       | XLOC_110030 | 251 coding  | noncoding | noncoding | noncoding |
| MSTRG.103520.3 | STAG3L4      | XLOC_110031 | 277 coding  | noncoding | noncoding | noncoding |
| MSTRG.103421.1 |              | XLOC_110049 | 240 coding  | noncoding | noncoding | noncoding |
| MSTRG.103423.1 |              | XLOC_110050 | 285 coding  | noncoding | noncoding | noncoding |
| MSTRG.103427.1 |              | XLOC_110052 | 244 coding  | noncoding | noncoding | noncoding |
| MSTRG.103429.1 |              | XLOC_110054 | 265 coding  | noncoding | noncoding | noncoding |
| MSTRG.103435.1 | LOC105375341 | XLOC_110057 | 213 coding  | noncoding | noncoding | noncoding |
| MSTRG.103437.1 | LOC105375341 | XLOC_110059 | 273 coding  | noncoding | noncoding | noncoding |
| MSTRG.103455.1 |              | XLOC_110067 | 223 coding  | noncoding | noncoding | noncoding |
| MSTRG.103457.1 |              | XLOC_110069 | 237 coding  | noncoding | noncoding | noncoding |
| MSTRG.103472.1 | LOC105375345 | XLOC_110078 | 201 coding  | noncoding | noncoding | noncoding |
| MSTRG.103470.1 |              | XLOC_110079 | 412 coding  | coding    | noncoding | noncoding |
| MSTRG.103475.1 |              | XLOC_110080 | 266 coding  | noncoding | noncoding | noncoding |
| MSTRG.103479.1 |              | XLOC_110082 | 293 coding  | noncoding | noncoding | noncoding |
| MSTRG.103484.1 | LOC105375346 | XLOC_110083 | 255 coding  | noncoding | noncoding | noncoding |
| MSTRG.103598.1 |              | XLOC_110300 | 411 coding  | noncoding | noncoding | noncoding |
| MSTRG.103605.1 |              | XLOC_110303 | 273 coding  | noncoding | noncoding | noncoding |
| MSTRG.103630.1 | GALNT17      | XLOC_110315 | 260 coding  | noncoding | noncoding | noncoding |
| XM_011516596.2 | CALN1        | XLOC_110318 | 9956 coding | coding    | coding    | coding    |
| MSTRG.103638.1 | CALN1        | XLOC_110321 | 255 coding  | noncoding | noncoding | noncoding |
| MSTRG.103639.1 | CALN1        | XLOC_110322 | 383 coding  | noncoding | noncoding | noncoding |
| MSTRG.103642.1 | CALN1        | XLOC_110323 | 342 coding  | noncoding | noncoding | noncoding |
| MSTRG.103660.1 | CALN1        | XLOC_110330 | 261 coding  | noncoding | noncoding | noncoding |
| MSTRG.103675.1 |              | XLOC_110337 | 318 coding  | noncoding | noncoding | noncoding |
| MSTRG.103681.1 | TYW1B        | XLOC_110340 | 253 coding  | noncoding | noncoding | noncoding |
| MSTRG.103685.1 | TYW1B        | XLOC_110342 | 786 coding  | noncoding | noncoding | noncoding |
| MSTRG.103686.1 | TYW1B        | XLOC_110343 | 264 coding  | noncoding | noncoding | noncoding |
| MSTRG.103688.1 | TYW1B        | XLOC_110345 | 751 coding  | noncoding | noncoding | noncoding |
| MSTRG.103810.2 | TRIM74       | XLOC_110352 | 908 coding  | coding    | coding    | noncoding |
| XR_002956448.1 | TRIM74       | XLOC_110352 | 1590 coding | noncoding | coding    | noncoding |
| XM_011516277.1 | MLXIPL       | XLOC_110371 | 3448 coding | coding    | coding    | coding    |

|                   |              |             |             |           |           |           |
|-------------------|--------------|-------------|-------------|-----------|-----------|-----------|
| MSTRG. 103707. 1  |              | XLOC_110372 | 227 coding  | noncoding | noncoding | noncoding |
| MSTRG. 103740. 1  | STX1A        | XLOC_110376 | 266 coding  | noncoding | noncoding | noncoding |
| NM_001306. 4      | CLDN3        | XLOC_110379 | 1274 coding | coding    | coding    | coding    |
| MSTRG. 103725. 1  | METTL27      | XLOC_110383 | 226 coding  | noncoding | noncoding | noncoding |
| MSTRG. 103720. 1  |              | XLOC_110384 | 257 coding  | noncoding | noncoding | noncoding |
| MSTRG. 103729. 1  |              | XLOC_110385 | 225 coding  | noncoding | noncoding | noncoding |
| MSTRG. 103731. 1  |              | XLOC_110386 | 287 coding  | noncoding | noncoding | noncoding |
| MSTRG. 103753. 1  |              | XLOC_110388 | 225 coding  | noncoding | noncoding | noncoding |
| MSTRG. 103758. 1  | ELN          | XLOC_110393 | 252 coding  | noncoding | noncoding | noncoding |
| MSTRG. 103755. 1  |              | XLOC_110395 | 262 coding  | noncoding | noncoding | noncoding |
| MSTRG. 103767. 1  |              | XLOC_110400 | 305 coding  | noncoding | noncoding | noncoding |
| MSTRG. 103769. 1  |              | XLOC_110401 | 339 coding  | noncoding | noncoding | noncoding |
| MSTRG. 103779. 1  | CLIP2        | XLOC_110404 | 214 coding  | noncoding | noncoding | noncoding |
| MSTRG. 103775. 1  |              | XLOC_110412 | 391 coding  | noncoding | noncoding | noncoding |
| MSTRG. 103792. 1  | GTF2IRD1     | XLOC_110414 | 238 coding  | noncoding | noncoding | noncoding |
| MSTRG. 103794. 1  | GTF2IRD1     | XLOC_110416 | 305 coding  | noncoding | noncoding | noncoding |
| MSTRG. 103788. 1  |              | XLOC_110419 | 258 coding  | noncoding | noncoding | noncoding |
| NM_001368300. 1   | GTF2IRD2     | XLOC_110424 | 4387 coding | coding    | coding    | coding    |
| MSTRG. 103838. 1  | GTF2IRD2     | XLOC_110425 | 226 coding  | noncoding | noncoding | noncoding |
| XR_001745245. 1   | LOC107986811 | XLOC_110429 | 1660 coding | noncoding | noncoding | noncoding |
| NM_001363447. 2   | RCC1L        | XLOC_110431 | 2543 coding | coding    | coding    | coding    |
| MSTRG. 103912. 1  | HIP1         | XLOC_110453 | 227 coding  | noncoding | noncoding | noncoding |
| MSTRG. 103915. 1  | HIP1         | XLOC_110455 | 282 coding  | noncoding | noncoding | noncoding |
| MSTRG. 103917. 1  | HIP1         | XLOC_110457 | 524 coding  | noncoding | noncoding | noncoding |
| MSTRG. 103934. 1  | HIP1         | XLOC_110461 | 259 coding  | noncoding | noncoding | noncoding |
| MSTRG. 103980. 1  | STYXL1       | XLOC_110470 | 238 coding  | noncoding | noncoding | noncoding |
| MSTRG. 104729. 1  | SSC4D        | XLOC_110486 | 227 coding  | noncoding | noncoding | noncoding |
| MSTRG. 104767. 1  |              | XLOC_110502 | 253 coding  | noncoding | noncoding | noncoding |
| NM_001351348. 1   | SPDYE18      | XLOC_110510 | 1242 coding | coding    | coding    | coding    |
| XM_011516327. 2   | GSAP         | XLOC_110531 | 3218 coding | coding    | coding    | coding    |
| MSTRG. 104834. 1  | GSAP         | XLOC_110538 | 291 coding  | noncoding | noncoding | noncoding |
| MSTRG. 104237. 1  |              | XLOC_110557 | 241 coding  | noncoding | noncoding | noncoding |
| MSTRG. 104239. 1  |              | XLOC_110558 | 226 coding  | noncoding | noncoding | noncoding |
| MSTRG. 104267. 9  | APTR         | XLOC_110566 | 585 coding  | noncoding | coding    | noncoding |
| MSTRG. 104267. 11 | APTR         | XLOC_110566 | 724 coding  | noncoding | noncoding | noncoding |
| MSTRG. 104313. 4  | PHTF2        | XLOC_110570 | 2098 coding | coding    | noncoding | noncoding |
| MSTRG. 104360. 1  | MAGI2        | XLOC_110587 | 325 coding  | noncoding | noncoding | noncoding |
| MSTRG. 104294. 1  |              | XLOC_110611 | 274 coding  | noncoding | noncoding | noncoding |
| MSTRG. 104304. 1  |              | XLOC_110618 | 285 coding  | noncoding | noncoding | noncoding |
| MSTRG. 104436. 1  |              | XLOC_110663 | 307 coding  | noncoding | noncoding | noncoding |
| MSTRG. 104437. 1  |              | XLOC_110664 | 227 coding  | noncoding | noncoding | noncoding |
| MSTRG. 104438. 1  |              | XLOC_110665 | 383 coding  | noncoding | noncoding | noncoding |
| MSTRG. 104457. 1  |              | XLOC_110677 | 303 coding  | noncoding | noncoding | noncoding |

|                |              |             |             |           |           |           |
|----------------|--------------|-------------|-------------|-----------|-----------|-----------|
| XM_006716119.3 | CACNA2D1     | XLOC_110688 | 9520 coding | coding    | coding    | coding    |
| MSTRG.104531.1 | CACNA2D1     | XLOC_110697 | 261 coding  | noncoding | noncoding | noncoding |
| MSTRG.104541.1 | PCLO         | XLOC_110714 | 266 coding  | noncoding | noncoding | noncoding |
| MSTRG.104557.1 |              | XLOC_110724 | 269 coding  | noncoding | noncoding | noncoding |
| MSTRG.104599.1 | SEMA3A       | XLOC_110737 | 423 coding  | noncoding | noncoding | noncoding |
| MSTRG.104604.1 | SEMA3A       | XLOC_110740 | 281 coding  | noncoding | noncoding | noncoding |
| MSTRG.104569.1 |              | XLOC_110743 | 237 coding  | noncoding | noncoding | noncoding |
| MSTRG.104570.1 |              | XLOC_110744 | 513 coding  | noncoding | noncoding | noncoding |
| MSTRG.104580.1 |              | XLOC_110747 | 251 coding  | noncoding | noncoding | noncoding |
| XM_017011873.1 | SEMA3D       | XLOC_110751 | 7121 coding | coding    | coding    | coding    |
| MSTRG.104608.1 |              | XLOC_110756 | 288 coding  | noncoding | noncoding | noncoding |
| MSTRG.104611.1 |              | XLOC_110758 | 322 coding  | noncoding | noncoding | noncoding |
| MSTRG.104660.1 | GRM3         | XLOC_110775 | 250 coding  | noncoding | noncoding | noncoding |
| MSTRG.105037.1 | ABCB4        | XLOC_110804 | 249 coding  | noncoding | noncoding | noncoding |
| MSTRG.104880.1 |              | XLOC_110867 | 239 coding  | noncoding | noncoding | noncoding |
| MSTRG.104958.1 | ZNF804B      | XLOC_110877 | 260 coding  | coding    | noncoding | noncoding |
| MSTRG.104976.1 | STEAP2-AS1   | XLOC_110885 | 230 coding  | noncoding | noncoding | noncoding |
| MSTRG.104979.1 | STEAP2-AS1   | XLOC_110888 | 295 coding  | noncoding | noncoding | noncoding |
| MSTRG.105003.1 |              | XLOC_110909 | 316 coding  | noncoding | noncoding | noncoding |
| MSTRG.105004.1 |              | XLOC_110910 | 249 coding  | noncoding | noncoding | noncoding |
| MSTRG.105078.1 |              | XLOC_110915 | 225 coding  | noncoding | noncoding | noncoding |
| MSTRG.105123.1 |              | XLOC_110933 | 311 coding  | noncoding | noncoding | noncoding |
| XM_011516004.3 | FAM133B      | XLOC_110973 | 2360 coding | noncoding | coding    | coding    |
| MSTRG.105305.1 | CDK6         | XLOC_110998 | 258 coding  | noncoding | noncoding | noncoding |
| MSTRG.105274.1 |              | XLOC_111003 | 295 coding  | noncoding | noncoding | noncoding |
| MSTRG.105277.1 |              | XLOC_111004 | 259 coding  | noncoding | noncoding | noncoding |
| NM_001303500.3 | SAMD9L       | XLOC_111009 | 6378 coding | noncoding | coding    | coding    |
| MSTRG.105335.1 |              | XLOC_111032 | 383 coding  | noncoding | noncoding | noncoding |
| MSTRG.105337.1 |              | XLOC_111033 | 230 coding  | noncoding | noncoding | noncoding |
| MSTRG.105340.1 |              | XLOC_111035 | 308 coding  | noncoding | noncoding | noncoding |
| MSTRG.105359.1 |              | XLOC_111050 | 239 coding  | noncoding | noncoding | noncoding |
| MSTRG.105403.1 |              | XLOC_111082 | 380 coding  | noncoding | noncoding | noncoding |
| MSTRG.105394.1 |              | XLOC_111084 | 244 coding  | noncoding | noncoding | noncoding |
| MSTRG.105397.1 |              | XLOC_111090 | 295 coding  | noncoding | noncoding | noncoding |
| MSTRG.105434.1 | PPP1R9A      | XLOC_111104 | 304 coding  | noncoding | noncoding | noncoding |
| MSTRG.105413.1 |              | XLOC_111122 | 257 coding  | noncoding | noncoding | noncoding |
| MSTRG.105529.1 | LOC105375410 | XLOC_111162 | 241 coding  | noncoding | noncoding | noncoding |
| MSTRG.105544.1 |              | XLOC_111185 | 227 coding  | noncoding | noncoding | noncoding |
| MSTRG.105559.1 | DLX6-AS1     | XLOC_111191 | 258 coding  | noncoding | noncoding | noncoding |
| MSTRG.105562.1 |              | XLOC_111196 | 264 coding  | noncoding | noncoding | noncoding |
| MSTRG.105574.1 |              | XLOC_111197 | 288 coding  | noncoding | noncoding | noncoding |
| MSTRG.105577.1 |              | XLOC_111198 | 277 coding  | noncoding | noncoding | noncoding |
| MSTRG.105592.1 | LOC105375416 | XLOC_111206 | 281 coding  | noncoding | noncoding | noncoding |

|                   |              |             |             |           |           |           |
|-------------------|--------------|-------------|-------------|-----------|-----------|-----------|
| MSTRG. 105600. 1  |              | XLOC_111211 | 297 coding  | noncoding | noncoding | noncoding |
| MSTRG. 105665. 1  | CZIP-ASNS    | XLOC_111220 | 274 coding  | noncoding | noncoding | noncoding |
| MSTRG. 105738. 1  | BRI3         | XLOC_111240 | 290 coding  | noncoding | noncoding | noncoding |
| MSTRG. 105743. 1  | BAIAP2L1     | XLOC_111242 | 364 coding  | noncoding | noncoding | noncoding |
| MSTRG. 105744. 1  | BAIAP2L1     | XLOC_111243 | 427 coding  | noncoding | noncoding | noncoding |
| MSTRG. 105745. 1  | BAIAP2L1     | XLOC_111244 | 242 coding  | coding    | noncoding | noncoding |
| MSTRG. 105683. 1  |              | XLOC_111245 | 255 coding  | noncoding | noncoding | noncoding |
| MSTRG. 105678. 1  |              | XLOC_111246 | 315 coding  | noncoding | noncoding | noncoding |
| MSTRG. 105682. 1  |              | XLOC_111247 | 570 coding  | noncoding | noncoding | noncoding |
| MSTRG. 105676. 1  |              | XLOC_111249 | 263 coding  | noncoding | noncoding | noncoding |
| MSTRG. 105684. 1  |              | XLOC_111252 | 277 coding  | noncoding | noncoding | noncoding |
| MSTRG. 105698. 1  |              | XLOC_111257 | 290 coding  | noncoding | noncoding | noncoding |
| MSTRG. 105696. 1  |              | XLOC_111258 | 277 coding  | noncoding | noncoding | noncoding |
| MSTRG. 105701. 1  |              | XLOC_111260 | 300 coding  | noncoding | noncoding | noncoding |
| MSTRG. 105704. 1  | TMEM130      | XLOC_111262 | 250 coding  | noncoding | noncoding | noncoding |
| MSTRG. 105748. 1  |              | XLOC_111272 | 317 coding  | noncoding | noncoding | noncoding |
| MSTRG. 105751. 1  |              | XLOC_111274 | 283 coding  | noncoding | noncoding | noncoding |
| MSTRG. 105769. 1  | MYH16        | XLOC_111276 | 245 coding  | noncoding | noncoding | noncoding |
| MSTRG. 105773. 8  | PDAP1        | XLOC_111279 | 1607 coding | coding    | coding    | noncoding |
| NM_001198879. 2   | ATP5MF-PTCD1 | XLOC_111279 | 5504 coding | coding    | coding    | coding    |
| MSTRG. 105775. 3  | ARPC1A       | XLOC_111280 | 1245 coding | noncoding | coding    | noncoding |
| MSTRG. 105798. 10 | FAM200A      | XLOC_111291 | 2625 coding | coding    | noncoding | noncoding |
| MSTRG. 105798. 16 | FAM200A      | XLOC_111291 | 1699 coding | coding    | coding    | noncoding |
| MSTRG. 105811. 1  | TMEM225B     | XLOC_111294 | 211 coding  | noncoding | noncoding | noncoding |
| NM_001318135. 2   | ZNF3         | XLOC_111333 | 2793 coding | coding    | coding    | coding    |
| MSTRG. 105887. 1  | GAL3ST4      | XLOC_111345 | 254 coding  | noncoding | noncoding | noncoding |
| XR_002956434. 1   | CASTOR3      | XLOC_111347 | 5377 coding | coding    | coding    | coding    |
| MSTRG. 106040. 1  |              | XLOC_111350 | 213 coding  | noncoding | noncoding | noncoding |
| MSTRG. 106041. 1  |              | XLOC_111351 | 215 coding  | noncoding | noncoding | noncoding |
| MSTRG. 105913. 1  | LOC107986829 | XLOC_111359 | 312 coding  | noncoding | noncoding | noncoding |
| MSTRG. 105906. 1  |              | XLOC_111360 | 229 coding  | noncoding | noncoding | noncoding |
| MSTRG. 105923. 1  | SAP25        | XLOC_111364 | 279 coding  | noncoding | noncoding | noncoding |
| MSTRG. 105945. 1  | FBXO24       | XLOC_111369 | 263 coding  | noncoding | noncoding | noncoding |
| MSTRG. 105927. 1  | ACTL6B       | XLOC_111375 | 292 coding  | noncoding | noncoding | noncoding |
| MSTRG. 105931. 1  | LOC105375429 | XLOC_111377 | 233 coding  | noncoding | noncoding | noncoding |
| MSTRG. 105932. 1  | LOC105375429 | XLOC_111378 | 239 coding  | noncoding | noncoding | noncoding |
| MSTRG. 105951. 1  |              | XLOC_111381 | 237 coding  | noncoding | noncoding | noncoding |
| MSTRG. 105954. 1  |              | XLOC_111382 | 348 coding  | noncoding | noncoding | noncoding |
| MSTRG. 105967. 1  | SLC12A9      | XLOC_111384 | 272 coding  | noncoding | noncoding | noncoding |
| MSTRG. 105978. 1  |              | XLOC_111394 | 244 coding  | noncoding | noncoding | noncoding |
| MSTRG. 105984. 1  | MUC12        | XLOC_111396 | 323 coding  | noncoding | noncoding | noncoding |
| MSTRG. 105993. 1  | MUC17        | XLOC_111398 | 349 coding  | noncoding | noncoding | noncoding |
| MSTRG. 105994. 1  | MUC17        | XLOC_111399 | 270 coding  | noncoding | noncoding | noncoding |

|                   |              |             |              |           |           |           |
|-------------------|--------------|-------------|--------------|-----------|-----------|-----------|
| MSTRG. 106000. 1  |              | XLOC_111400 | 253 coding   | noncoding | noncoding | noncoding |
| MSTRG. 106001. 1  |              | XLOC_111403 | 254 coding   | noncoding | noncoding | noncoding |
| XM_005250561. 5   | VGF          | XLOC_111407 | 2731 coding  | noncoding | coding    | coding    |
| MSTRG. 106018. 1  |              | XLOC_111413 | 323 coding   | noncoding | noncoding | noncoding |
| NM_001287525. 2   | IFT22        | XLOC_111417 | 4954 coding  | coding    | coding    | noncoding |
| MSTRG. 106031. 1  |              | XLOC_111418 | 215 coding   | noncoding | noncoding | noncoding |
| MSTRG. 106075. 1  | COL26A1      | XLOC_111419 | 306 coding   | noncoding | noncoding | noncoding |
| MSTRG. 106082. 1  | COL26A1      | XLOC_111421 | 539 coding   | noncoding | noncoding | noncoding |
| MSTRG. 106068. 1  |              | XLOC_111430 | 255 coding   | noncoding | noncoding | noncoding |
| MSTRG. 106063. 1  |              | XLOC_111431 | 215 coding   | noncoding | noncoding | noncoding |
| MSTRG. 106603. 4  | LOC100630923 | XLOC_111437 | 529 coding   | coding    | coding    | noncoding |
| MSTRG. 106613. 1  | ORAI2        | XLOC_111443 | 593 coding   | noncoding | noncoding | noncoding |
| MSTRG. 106620. 1  | LRWD1        | XLOC_111448 | 454 coding   | coding    | noncoding | noncoding |
| MSTRG. 106627. 1  | UPK3BL2      | XLOC_111452 | 230 coding   | noncoding | noncoding | noncoding |
| MSTRG. 106633. 1  | POLR2J2      | XLOC_111455 | 230 coding   | noncoding | noncoding | noncoding |
| MSTRG. 106190. 1  | RELN         | XLOC_111492 | 245 coding   | noncoding | noncoding | noncoding |
| MSTRG. 106197. 1  | RELN         | XLOC_111495 | 316 coding   | noncoding | noncoding | noncoding |
| MSTRG. 106133. 1  | ORC5         | XLOC_111502 | 263 coding   | noncoding | noncoding | noncoding |
| MSTRG. 106122. 1  |              | XLOC_111506 | 261 coding   | noncoding | noncoding | noncoding |
| MSTRG. 106152. 1  | LHFPL3       | XLOC_111517 | 363 coding   | noncoding | noncoding | noncoding |
| MSTRG. 106168. 1  | LHFPL3       | XLOC_111524 | 282 coding   | noncoding | noncoding | noncoding |
| MSTRG. 106438. 19 | SRPK2        | XLOC_111529 | 12766 coding | coding    | coding    | coding    |
| MSTRG. 106203. 1  | PUS7         | XLOC_111531 | 220 coding   | noncoding | noncoding | noncoding |
| MSTRG. 106204. 1  | PUS7         | XLOC_111532 | 240 coding   | noncoding | noncoding | noncoding |
| MSTRG. 106206. 1  |              | XLOC_111535 | 273 coding   | noncoding | noncoding | noncoding |
| XM_006715901. 3   | ATXN7L1      | XLOC_111536 | 6354 coding  | coding    | coding    | coding    |
| MSTRG. 106219. 1  |              | XLOC_111572 | 209 coding   | noncoding | noncoding | noncoding |
| MSTRG. 106255. 1  | CTB-30L5.1   | XLOC_111603 | 238 coding   | noncoding | noncoding | noncoding |
| MSTRG. 106410. 1  | SLC26A3      | XLOC_111631 | 273 coding   | noncoding | noncoding | noncoding |
| MSTRG. 106397. 1  |              | XLOC_111637 | 313 coding   | noncoding | noncoding | noncoding |
| MSTRG. 106461. 1  | PNPLA8       | XLOC_111660 | 245 coding   | noncoding | noncoding | noncoding |
| MSTRG. 106456. 1  |              | XLOC_111663 | 301 coding   | noncoding | noncoding | noncoding |
| MSTRG. 106466. 1  |              | XLOC_111673 | 314 coding   | noncoding | noncoding | noncoding |
| MSTRG. 106471. 1  |              | XLOC_111676 | 281 coding   | noncoding | noncoding | noncoding |
| MSTRG. 106543. 1  |              | XLOC_111682 | 214 coding   | noncoding | noncoding | noncoding |
| MSTRG. 106745. 8  | IFRD1        | XLOC_111859 | 1016 coding  | coding    | noncoding | noncoding |
| MSTRG. 106722. 1  |              | XLOC_111870 | 272 coding   | noncoding | noncoding | noncoding |
| MSTRG. 106729. 1  | LOC101928012 | XLOC_111872 | 287 coding   | noncoding | noncoding | noncoding |
| MSTRG. 106779. 1  |              | XLOC_111906 | 213 coding   | noncoding | noncoding | noncoding |
| MSTRG. 106787. 1  |              | XLOC_111910 | 285 coding   | noncoding | noncoding | noncoding |
| MSTRG. 106865. 1  | FOXP2        | XLOC_111933 | 401 coding   | noncoding | noncoding | noncoding |
| MSTRG. 106839. 1  |              | XLOC_111942 | 290 coding   | noncoding | noncoding | noncoding |
| MSTRG. 106838. 1  |              | XLOC_111943 | 271 coding   | coding    | noncoding | noncoding |

|                  |              |             |             |           |           |           |
|------------------|--------------|-------------|-------------|-----------|-----------|-----------|
| MSTRG. 106979. 3 | MDFIC        | XLOC_111946 | 2368 coding | coding    | coding    | noncoding |
| MSTRG. 107008. 1 | LINC01392    | XLOC_111951 | 290 coding  | noncoding | noncoding | noncoding |
| MSTRG. 106949. 1 |              | XLOC_111954 | 583 coding  | coding    | coding    | noncoding |
| MSTRG. 106968. 1 |              | XLOC_111962 | 243 coding  | noncoding | noncoding | noncoding |
| MSTRG. 106973. 1 |              | XLOC_111967 | 226 coding  | noncoding | noncoding | noncoding |
| NR_130921. 2     | LOC102724434 | XLOC_111984 | 1997 coding | noncoding | noncoding | noncoding |
| MSTRG. 107045. 1 |              | XLOC_111985 | 238 coding  | noncoding | noncoding | noncoding |
| MSTRG. 107086. 1 |              | XLOC_112003 | 302 coding  | noncoding | noncoding | noncoding |
| MSTRG. 107141. 1 |              | XLOC_112035 | 366 coding  | noncoding | noncoding | noncoding |
| MSTRG. 107150. 1 |              | XLOC_112039 | 415 coding  | noncoding | noncoding | noncoding |
| MSTRG. 107196. 1 |              | XLOC_112051 | 223 coding  | noncoding | noncoding | noncoding |
| MSTRG. 107205. 1 | LOC105375473 | XLOC_112054 | 632 coding  | noncoding | noncoding | noncoding |
| MSTRG. 107246. 1 |              | XLOC_112066 | 305 coding  | noncoding | noncoding | noncoding |
| MSTRG. 107303. 1 | LINC02476    | XLOC_112086 | 249 coding  | noncoding | noncoding | noncoding |
| MSTRG. 107272. 1 |              | XLOC_112089 | 292 coding  | noncoding | noncoding | noncoding |
| MSTRG. 107275. 1 |              | XLOC_112091 | 280 coding  | noncoding | noncoding | noncoding |
| MSTRG. 107350. 1 |              | XLOC_112125 | 284 coding  | noncoding | noncoding | noncoding |
| MSTRG. 107380. 1 | PTPRZ1       | XLOC_112137 | 265 coding  | noncoding | noncoding | noncoding |
| MSTRG. 107383. 1 |              | XLOC_112140 | 346 coding  | noncoding | noncoding | noncoding |
| MSTRG. 107699. 1 | CADPS2       | XLOC_112153 | 220 coding  | noncoding | noncoding | noncoding |
| MSTRG. 107741. 1 | HYAL4        | XLOC_112192 | 234 coding  | noncoding | noncoding | noncoding |
| MSTRG. 107751. 1 |              | XLOC_112198 | 312 coding  | coding    | noncoding | noncoding |
| MSTRG. 107778. 1 |              | XLOC_112213 | 291 coding  | noncoding | noncoding | noncoding |
| MSTRG. 107822. 1 | LOC101928283 | XLOC_112248 | 221 coding  | noncoding | noncoding | noncoding |
| MSTRG. 107829. 1 |              | XLOC_112252 | 253 coding  | noncoding | noncoding | noncoding |
| MSTRG. 107843. 1 |              | XLOC_112260 | 360 coding  | noncoding | noncoding | noncoding |
| MSTRG. 107880. 1 | GRM8         | XLOC_112266 | 343 coding  | noncoding | noncoding | noncoding |
| MSTRG. 107884. 1 | GRM8         | XLOC_112269 | 229 coding  | noncoding | noncoding | noncoding |
| MSTRG. 107892. 1 | GRM8         | XLOC_112272 | 249 coding  | noncoding | noncoding | noncoding |
| MSTRG. 107913. 1 |              | XLOC_112291 | 347 coding  | noncoding | noncoding | noncoding |
| MSTRG. 107930. 1 | LOC105375490 | XLOC_112294 | 312 coding  | noncoding | noncoding | noncoding |
| MSTRG. 108069. 1 |              | XLOC_112307 | 453 coding  | noncoding | noncoding | noncoding |
| MSTRG. 107947. 1 |              | XLOC_112310 | 408 coding  | noncoding | noncoding | noncoding |
| MSTRG. 107948. 1 |              | XLOC_112311 | 308 coding  | noncoding | noncoding | noncoding |
| MSTRG. 107974. 1 |              | XLOC_112319 | 222 coding  | noncoding | noncoding | noncoding |
| MSTRG. 108050. 1 | TNPO3        | XLOC_112356 | 210 coding  | noncoding | noncoding | noncoding |
| MSTRG. 108051. 1 | TNPO3        | XLOC_112357 | 276 coding  | noncoding | noncoding | noncoding |
| MSTRG. 108025. 1 |              | XLOC_112359 | 282 coding  | noncoding | noncoding | noncoding |
| MSTRG. 108027. 1 |              | XLOC_112360 | 247 coding  | noncoding | noncoding | noncoding |
| MSTRG. 108156. 1 |              | XLOC_112377 | 289 coding  | noncoding | noncoding | noncoding |
| MSTRG. 108157. 1 |              | XLOC_112378 | 288 coding  | noncoding | noncoding | noncoding |
| MSTRG. 108160. 1 |              | XLOC_112379 | 964 coding  | noncoding | noncoding | noncoding |
| MSTRG. 108169. 1 | NRF1         | XLOC_112381 | 1834 coding | coding    | noncoding | coding    |

|                 |              |             |              |           |           |           |
|-----------------|--------------|-------------|--------------|-----------|-----------|-----------|
| NM_182697.3     | UBE2H        | XLOC_112391 | 5069 coding  | coding    | coding    | coding    |
| MSTRG.108091.1  | UBE2H        | XLOC_112395 | 224 coding   | noncoding | noncoding | noncoding |
| MSTRG.108100.1  | ZC3HC1       | XLOC_112404 | 243 coding   | noncoding | noncoding | noncoding |
| MSTRG.108101.1  | ZC3HC1       | XLOC_112405 | 223 coding   | noncoding | noncoding | noncoding |
| MSTRG.108516.1  | LOC105375508 | XLOC_112434 | 273 coding   | noncoding | noncoding | noncoding |
| NR_109853.1     | LINC-PINT    | XLOC_112467 | 2298 coding  | noncoding | noncoding | noncoding |
| NR_109852.1     | LINC-PINT    | XLOC_112467 | 3230 coding  | noncoding | noncoding | noncoding |
| MSTRG.108592.12 | MKLN1        | XLOC_112500 | 3448 coding  | coding    | noncoding | noncoding |
| MSTRG.108592.18 | MKLN1        | XLOC_112500 | 1233 coding  | coding    | noncoding | noncoding |
| MSTRG.108218.1  |              | XLOC_112516 | 249 coding   | noncoding | noncoding | noncoding |
| XM_006716171.4  | PLXNA4       | XLOC_112519 | 13417 coding | coding    | coding    | coding    |
| XM_011516676.2  | PLXNA4       | XLOC_112519 | 4587 coding  | coding    | coding    | coding    |
| MSTRG.108330.1  | CHCHD3       | XLOC_112549 | 325 coding   | noncoding | noncoding | noncoding |
| MSTRG.108233.1  |              | XLOC_112573 | 247 coding   | noncoding | noncoding | noncoding |
| MSTRG.108366.1  | LRGUK        | XLOC_112599 | 255 coding   | noncoding | noncoding | noncoding |
| XM_024446695.1  | AKR1B1       | XLOC_112606 | 2098 coding  | coding    | coding    | coding    |
| MSTRG.108379.1  |              | XLOC_112609 | 248 coding   | noncoding | noncoding | noncoding |
| MSTRG.108381.1  |              | XLOC_112610 | 238 coding   | noncoding | noncoding | noncoding |
| XR_928005.2     | LOC105375520 | XLOC_112611 | 12249 coding | coding    | coding    | noncoding |
| MSTRG.108670.1  |              | XLOC_112662 | 466 coding   | noncoding | noncoding | noncoding |
| MSTRG.109059.1  | LOC105375523 | XLOC_112718 | 314 coding   | noncoding | noncoding | noncoding |
| MSTRG.108788.1  |              | XLOC_112724 | 261 coding   | noncoding | noncoding | noncoding |
| MSTRG.108818.1  | PTN          | XLOC_112739 | 246 coding   | noncoding | noncoding | noncoding |
| MSTRG.108819.1  | PTN          | XLOC_112740 | 292 coding   | noncoding | noncoding | noncoding |
| MSTRG.108814.1  |              | XLOC_112743 | 222 coding   | noncoding | noncoding | noncoding |
| NM_001321710.2  | DGKI         | XLOC_112744 | 13232 coding | coding    | coding    | coding    |
| MSTRG.108844.1  | DGKI         | XLOC_112747 | 207 coding   | noncoding | noncoding | noncoding |
| MSTRG.108860.1  | DGKI         | XLOC_112755 | 229 coding   | noncoding | noncoding | noncoding |
| MSTRG.108901.1  | CREB3L2      | XLOC_112767 | 275 coding   | noncoding | noncoding | noncoding |
| MSTRG.108881.1  |              | XLOC_112775 | 306 coding   | noncoding | noncoding | noncoding |
| MSTRG.108891.1  |              | XLOC_112780 | 267 coding   | noncoding | noncoding | noncoding |
| MSTRG.108893.1  |              | XLOC_112781 | 309 coding   | noncoding | noncoding | noncoding |
| MSTRG.108905.1  | SVOPL        | XLOC_112785 | 328 coding   | noncoding | noncoding | noncoding |
| XM_011516442.2  | KIAA1549     | XLOC_112789 | 12658 coding | coding    | coding    | coding    |
| MSTRG.108924.1  | KIAA1549     | XLOC_112794 | 314 coding   | noncoding | noncoding | noncoding |
| MSTRG.108953.1  | ZC3HAV1      | XLOC_112801 | 389 coding   | noncoding | noncoding | noncoding |
| MSTRG.108966.1  |              | XLOC_112819 | 247 coding   | noncoding | noncoding | noncoding |
| MSTRG.108986.1  | UBN2         | XLOC_112824 | 259 coding   | noncoding | noncoding | noncoding |
| MSTRG.108987.1  | UBN2         | XLOC_112825 | 204 coding   | noncoding | noncoding | noncoding |
| MSTRG.109065.1  |              | XLOC_112830 | 255 coding   | noncoding | noncoding | noncoding |
| MSTRG.109248.1  | HIPK2        | XLOC_112840 | 302 coding   | noncoding | noncoding | noncoding |
| MSTRG.109263.2  | TBXAS1       | XLOC_112851 | 3502 coding  | coding    | coding    | coding    |
| MSTRG.109093.3  | KDM7A        | XLOC_112857 | 4090 coding  | coding    | coding    | coding    |

|                   |          |             |             |           |           |           |
|-------------------|----------|-------------|-------------|-----------|-----------|-----------|
| MSTRG. 109078. 1  |          | XLOC_112858 | 325 coding  | noncoding | noncoding | noncoding |
| MSTRG. 109102. 1  | SLC37A3  | XLOC_112869 | 268 coding  | noncoding | noncoding | noncoding |
| MSTRG. 109144. 8  | BRAF     | XLOC_112882 | 1825 coding | coding    | coding    | coding    |
| MSTRG. 109154. 1  | BRAF     | XLOC_112892 | 244 coding  | noncoding | noncoding | noncoding |
| MSTRG. 109171. 1  | TMEM178B | XLOC_112908 | 269 coding  | noncoding | noncoding | noncoding |
| MSTRG. 109526. 13 | TRBV1    | XLOC_112979 | 3905 coding | coding    | coding    | coding    |
| MSTRG. 109526. 29 | TRBV1    | XLOC_112979 | 936 coding  | coding    | noncoding | noncoding |
| MSTRG. 109526. 39 | TRBV1    | XLOC_112979 | 996 coding  | coding    | coding    | noncoding |
| MSTRG. 109423. 9  | EPHA1    | XLOC_113011 | 3382 coding | coding    | coding    | coding    |
| MSTRG. 109583. 1  |          | XLOC_113106 | 306 coding  | noncoding | noncoding | noncoding |
| MSTRG. 109664. 1  | CNTNAP2  | XLOC_113135 | 384 coding  | noncoding | noncoding | noncoding |
| MSTRG. 109673. 1  | CNTNAP2  | XLOC_113138 | 265 coding  | coding    | noncoding | noncoding |
| MSTRG. 109621. 1  |          | XLOC_113164 | 228 coding  | noncoding | noncoding | noncoding |
| MSTRG. 109624. 1  |          | XLOC_113166 | 264 coding  | noncoding | noncoding | noncoding |
| MSTRG. 109625. 1  |          | XLOC_113167 | 214 coding  | noncoding | noncoding | noncoding |
| MSTRG. 109629. 1  |          | XLOC_113168 | 299 coding  | noncoding | noncoding | noncoding |
| MSTRG. 109630. 1  |          | XLOC_113169 | 277 coding  | noncoding | noncoding | noncoding |
| MSTRG. 109634. 1  |          | XLOC_113175 | 256 coding  | noncoding | noncoding | noncoding |
| MSTRG. 109721. 1  |          | XLOC_113189 | 281 coding  | noncoding | noncoding | noncoding |
| MSTRG. 109733. 1  | PDIA4    | XLOC_113195 | 222 coding  | noncoding | noncoding | noncoding |
| MSTRG. 109734. 1  | PDIA4    | XLOC_113196 | 402 coding  | noncoding | noncoding | noncoding |
| MSTRG. 109786. 1  |          | XLOC_113223 | 276 coding  | noncoding | noncoding | noncoding |
| MSTRG. 109888. 1  | KRBA1    | XLOC_113279 | 438 coding  | coding    | noncoding | noncoding |
| MSTRG. 110049. 2  | GIMAP4   | XLOC_113314 | 2238 coding | coding    | noncoding | noncoding |
| MSTRG. 110062. 3  | GIMAP2   | XLOC_113324 | 4701 coding | coding    | noncoding | noncoding |
| MSTRG. 109986. 1  |          | XLOC_113338 | 257 coding  | noncoding | noncoding | noncoding |
| NM_004935. 4      | CDK5     | XLOC_113351 | 1122 coding | coding    | coding    | coding    |
| NM_001164410. 3   | CDK5     | XLOC_113351 | 1026 coding | coding    | coding    | coding    |
| MSTRG. 110244. 6  | WDR86    | XLOC_113376 | 6326 coding | coding    | coding    | coding    |
| NM_001284260. 2   | WDR86    | XLOC_113376 | 2102 coding | coding    | coding    | coding    |
| MSTRG. 110230. 1  |          | XLOC_113395 | 276 coding  | noncoding | noncoding | noncoding |
| XM_011516286. 2   | PRKAG2   | XLOC_113396 | 5520 coding | coding    | coding    | coding    |
| MSTRG. 110300. 1  | PRKAG2   | XLOC_113408 | 355 coding  | noncoding | noncoding | noncoding |
| MSTRG. 110259. 1  |          | XLOC_113417 | 318 coding  | noncoding | noncoding | noncoding |
| MSTRG. 110264. 1  | GALNTL5  | XLOC_113421 | 232 coding  | noncoding | noncoding | noncoding |
| MSTRG. 110269. 1  |          | XLOC_113473 | 290 coding  | noncoding | noncoding | noncoding |
| MSTRG. 110274. 1  |          | XLOC_113476 | 267 coding  | noncoding | noncoding | noncoding |
| MSTRG. 110275. 1  |          | XLOC_113480 | 393 coding  | noncoding | noncoding | noncoding |
| MSTRG. 110309. 1  |          | XLOC_113504 | 247 coding  | coding    | noncoding | noncoding |
| MSTRG. 110312. 1  |          | XLOC_113506 | 286 coding  | noncoding | noncoding | noncoding |
| MSTRG. 110382. 1  | DPP6     | XLOC_113530 | 366 coding  | noncoding | noncoding | noncoding |
| MSTRG. 110383. 1  | DPP6     | XLOC_113531 | 310 coding  | noncoding | noncoding | noncoding |
| MSTRG. 110416. 1  |          | XLOC_113552 | 203 coding  | noncoding | noncoding | noncoding |

|                |              |             |              |           |           |           |
|----------------|--------------|-------------|--------------|-----------|-----------|-----------|
| MSTRG.110417.1 |              | XLOC_113553 | 240 coding   | noncoding | noncoding | noncoding |
| NR_163165.1    | CNPY1        | XLOC_113575 | 3746 coding  | coding    | coding    | noncoding |
| MSTRG.110575.1 | LOC100506302 | XLOC_113584 | 17446 coding | noncoding | coding    | noncoding |
| MSTRG.110548.1 |              | XLOC_113595 | 245 coding   | noncoding | noncoding | noncoding |
| MSTRG.110553.1 |              | XLOC_113602 | 287 coding   | noncoding | noncoding | noncoding |
| MSTRG.110544.1 |              | XLOC_113603 | 370 coding   | noncoding | noncoding | noncoding |
| MSTRG.110607.1 |              | XLOC_113636 | 205 coding   | noncoding | noncoding | noncoding |
| MSTRG.110613.1 |              | XLOC_113652 | 280 coding   | noncoding | noncoding | noncoding |
| XM_011516447.2 | PTPRN2       | XLOC_113661 | 11774 coding | coding    | coding    | coding    |
| XR_002956471.1 | ESYT2        | XLOC_113690 | 7518 coding  | coding    | coding    | coding    |
| MSTRG.110782.1 |              | XLOC_113721 | 279 coding   | noncoding | noncoding | noncoding |
| MSTRG.110817.1 |              | XLOC_113723 | 345 coding   | noncoding | noncoding | noncoding |
| MSTRG.110920.1 |              | XLOC_113775 | 215 coding   | noncoding | noncoding | noncoding |
| MSTRG.110942.1 |              | XLOC_113784 | 225 coding   | noncoding | noncoding | noncoding |
| MSTRG.111027.1 | CSMD1        | XLOC_113794 | 234 coding   | noncoding | noncoding | noncoding |
| MSTRG.111030.1 | CSMD1        | XLOC_113796 | 375 coding   | noncoding | noncoding | noncoding |
| MSTRG.111040.1 | CSMD1        | XLOC_113801 | 313 coding   | noncoding | coding    | noncoding |
| MSTRG.111058.1 | CSMD1        | XLOC_113810 | 299 coding   | noncoding | noncoding | noncoding |
| MSTRG.110979.1 | LOC105377793 | XLOC_113832 | 238 coding   | noncoding | noncoding | noncoding |
| MSTRG.110988.1 |              | XLOC_113837 | 303 coding   | noncoding | noncoding | noncoding |
| MSTRG.110993.1 |              | XLOC_113839 | 265 coding   | noncoding | noncoding | noncoding |
| MSTRG.111003.1 |              | XLOC_113844 | 309 coding   | noncoding | noncoding | noncoding |
| MSTRG.111132.1 |              | XLOC_113848 | 275 coding   | noncoding | noncoding | noncoding |
| XM_017013829.2 | MCPH1        | XLOC_113852 | 3853 coding  | coding    | coding    | coding    |
| MSTRG.111118.1 |              | XLOC_113916 | 238 coding   | noncoding | noncoding | noncoding |
| MSTRG.111339.1 | FAM167A-AS1  | XLOC_114001 | 304 coding   | noncoding | noncoding | noncoding |
| MSTRG.111413.7 | CTSB         | XLOC_114014 | 1781 coding  | coding    | coding    | coding    |
| MSTRG.111459.1 | LOC100506990 | XLOC_114027 | 227 coding   | noncoding | noncoding | noncoding |
| MSTRG.111498.1 | DLC1         | XLOC_114047 | 295 coding   | noncoding | noncoding | noncoding |
| MSTRG.111505.1 | DLC1         | XLOC_114053 | 615 coding   | noncoding | noncoding | noncoding |
| MSTRG.111481.1 |              | XLOC_114063 | 304 coding   | noncoding | noncoding | noncoding |
| MSTRG.111519.1 | SGCZ         | XLOC_114064 | 309 coding   | noncoding | noncoding | noncoding |
| MSTRG.111512.1 |              | XLOC_114082 | 231 coding   | noncoding | noncoding | noncoding |
| MSTRG.111564.1 |              | XLOC_114092 | 377 coding   | noncoding | noncoding | noncoding |
| MSTRG.111569.1 |              | XLOC_114095 | 271 coding   | noncoding | noncoding | noncoding |
| XR_001745519.1 | MICU3        | XLOC_114106 | 11463 coding | coding    | coding    | coding    |
| MSTRG.111683.1 | VPS37A       | XLOC_114126 | 529 coding   | noncoding | noncoding | noncoding |
| MSTRG.111643.1 | PDGFRL       | XLOC_114136 | 587 coding   | noncoding | noncoding | noncoding |
| MSTRG.111644.1 | PDGFRL       | XLOC_114137 | 251 coding   | noncoding | noncoding | noncoding |
| MSTRG.111663.1 | MTUS1        | XLOC_114142 | 257 coding   | noncoding | noncoding | noncoding |
| MSTRG.111667.1 | MTUS1        | XLOC_114144 | 249 coding   | noncoding | noncoding | noncoding |
| MSTRG.111648.1 |              | XLOC_114148 | 254 coding   | noncoding | noncoding | noncoding |
| NM_001160174.2 | NAT1         | XLOC_114175 | 2022 coding  | coding    | coding    | coding    |

|                   |              |             |             |           |           |           |
|-------------------|--------------|-------------|-------------|-----------|-----------|-----------|
| MSTRG. 111712. 1  |              | XLOC_114186 | 305 coding  | noncoding | noncoding | noncoding |
| MSTRG. 111736. 1  | PSD3         | XLOC_114193 | 236 coding  | noncoding | noncoding | noncoding |
| MSTRG. 111761. 1  | PSD3         | XLOC_114212 | 271 coding  | noncoding | noncoding | noncoding |
| MSTRG. 111715. 1  | LOC105379301 | XLOC_114214 | 274 coding  | noncoding | noncoding | noncoding |
| MSTRG. 111720. 1  | LOC100128993 | XLOC_114218 | 308 coding  | noncoding | noncoding | noncoding |
| MSTRG. 111934. 4  | CSGALNACT1   | XLOC_114237 | 5185 coding | coding    | coding    | coding    |
| MSTRG. 111821. 1  | INTS10       | XLOC_114244 | 238 coding  | noncoding | noncoding | noncoding |
| MSTRG. 111816. 1  |              | XLOC_114263 | 270 coding  | noncoding | noncoding | noncoding |
| MSTRG. 111841. 1  | LOC105379314 | XLOC_114274 | 301 coding  | noncoding | noncoding | noncoding |
| MSTRG. 111988. 1  | LGI3         | XLOC_114326 | 320 coding  | coding    | coding    | noncoding |
| MSTRG. 112007. 1  | PHYHIP       | XLOC_114330 | 301 coding  | noncoding | noncoding | noncoding |
| MSTRG. 112018. 1  | PIWIL2       | XLOC_114333 | 258 coding  | noncoding | noncoding | noncoding |
| MSTRG. 112021. 1  | PIWIL2       | XLOC_114334 | 273 coding  | noncoding | noncoding | noncoding |
| XM_011544604. 2   | CCAR2        | XLOC_114363 | 3582 coding | coding    | coding    | coding    |
| NM_003841. 4      | TNFRSF10C    | XLOC_114381 | 1494 coding | coding    | coding    | coding    |
| XM_017013964. 1   | CHMP7        | XLOC_114388 | 4560 coding | coding    | coding    | coding    |
| NM_016612. 4      | SLC25A37     | XLOC_114407 | 4672 coding | coding    | coding    | coding    |
| MSTRG. 112186. 15 | SLC25A37     | XLOC_114407 | 1403 coding | coding    | coding    | noncoding |
| XM_011544550. 2   | SLC25A37     | XLOC_114407 | 1176 coding | coding    | coding    | coding    |
| MSTRG. 112198. 1  | LOC107986930 | XLOC_114414 | 265 coding  | noncoding | noncoding | noncoding |
| MSTRG. 112202. 1  | LOC107986930 | XLOC_114417 | 249 coding  | noncoding | noncoding | noncoding |
| MSTRG. 112210. 1  | LOC107986930 | XLOC_114421 | 288 coding  | noncoding | noncoding | noncoding |
| MSTRG. 112211. 1  | LOC107986930 | XLOC_114422 | 267 coding  | noncoding | noncoding | noncoding |
| MSTRG. 112310. 1  | LOC101929294 | XLOC_114476 | 243 coding  | noncoding | noncoding | noncoding |
| MSTRG. 112264. 1  |              | XLOC_114501 | 240 coding  | noncoding | noncoding | noncoding |
| MSTRG. 112320. 1  |              | XLOC_114556 | 325 coding  | noncoding | noncoding | noncoding |
| MSTRG. 112339. 1  | LOC107986933 | XLOC_114564 | 410 coding  | noncoding | noncoding | noncoding |
| XM_005273559. 1   | PPP2R2A      | XLOC_114572 | 2358 coding | noncoding | coding    | coding    |
| XM_011544566. 1   | PPP2R2A      | XLOC_114572 | 2380 coding | noncoding | coding    | coding    |
| MSTRG. 112418. 1  | PPP2R2A      | XLOC_114576 | 205 coding  | noncoding | noncoding | noncoding |
| MSTRG. 112458. 1  |              | XLOC_114604 | 227 coding  | noncoding | noncoding | noncoding |
| MSTRG. 112387. 1  | DPYSL2       | XLOC_114611 | 393 coding  | noncoding | noncoding | noncoding |
| MSTRG. 112388. 1  | DPYSL2       | XLOC_114612 | 259 coding  | coding    | noncoding | noncoding |
| XM_005273447. 4   | PTK2B        | XLOC_114632 | 4079 coding | coding    | coding    | coding    |
| MSTRG. 112577. 1  | CHRNA2       | XLOC_114655 | 433 coding  | coding    | noncoding | noncoding |
| MSTRG. 112593. 1  | ESCO2        | XLOC_114667 | 258 coding  | noncoding | noncoding | noncoding |
| MSTRG. 112632. 1  | ELP3         | XLOC_114689 | 261 coding  | noncoding | noncoding | noncoding |
| MSTRG. 112638. 1  |              | XLOC_114708 | 278 coding  | noncoding | noncoding | noncoding |
| MSTRG. 112860. 1  | EXTL3        | XLOC_114713 | 210 coding  | noncoding | noncoding | noncoding |
| MSTRG. 112672. 1  |              | XLOC_114755 | 287 coding  | noncoding | noncoding | noncoding |
| MSTRG. 112707. 1  | LINC02099    | XLOC_114769 | 265 coding  | noncoding | noncoding | noncoding |
| MSTRG. 112741. 1  |              | XLOC_114780 | 312 coding  | noncoding | noncoding | noncoding |
| MSTRG. 112748. 1  | MBOAT4       | XLOC_114785 | 281 coding  | noncoding | noncoding | noncoding |

|                   |              |             |             |           |           |           |
|-------------------|--------------|-------------|-------------|-----------|-----------|-----------|
| MSTRG. 112725. 1  |              | XLOC_114791 | 329 coding  | noncoding | noncoding | noncoding |
| MSTRG. 112734. 1  |              | XLOC_114794 | 258 coding  | noncoding | noncoding | noncoding |
| MSTRG. 112787. 4  | GSR          | XLOC_114797 | 1693 coding | coding    | coding    | noncoding |
| MSTRG. 112755. 1  | UBXN8        | XLOC_114801 | 221 coding  | noncoding | noncoding | noncoding |
| MSTRG. 112761. 1  |              | XLOC_114807 | 220 coding  | noncoding | noncoding | noncoding |
| MSTRG. 112775. 1  | TEX15        | XLOC_114810 | 281 coding  | noncoding | noncoding | noncoding |
| MSTRG. 112771. 1  |              | XLOC_114813 | 291 coding  | noncoding | noncoding | noncoding |
| MSTRG. 112824. 1  | WRN          | XLOC_114825 | 492 coding  | noncoding | noncoding | noncoding |
| MSTRG. 112797. 1  |              | XLOC_114827 | 218 coding  | noncoding | noncoding | noncoding |
| MSTRG. 112805. 1  | LOC101929492 | XLOC_114833 | 312 coding  | noncoding | noncoding | noncoding |
| NM_013958. 3      | NRG1         | XLOC_114838 | 1728 coding | coding    | coding    | coding    |
| MSTRG. 113096. 1  | NRG1         | XLOC_114852 | 247 coding  | noncoding | noncoding | noncoding |
| MSTRG. 113101. 1  | NRG1         | XLOC_114855 | 239 coding  | noncoding | noncoding | noncoding |
| MSTRG. 112851. 1  | LOC105379362 | XLOC_114866 | 204 coding  | noncoding | noncoding | noncoding |
| MSTRG. 112856. 1  |              | XLOC_114871 | 274 coding  | noncoding | noncoding | noncoding |
| MSTRG. 112941. 1  | FUT10        | XLOC_114879 | 518 coding  | coding    | noncoding | noncoding |
| MSTRG. 112986. 1  | LOC105379364 | XLOC_114894 | 370 coding  | noncoding | noncoding | noncoding |
| MSTRG. 112996. 1  | LOC105379364 | XLOC_114897 | 240 coding  | noncoding | noncoding | noncoding |
| MSTRG. 112976. 1  |              | XLOC_114898 | 249 coding  | coding    | noncoding | noncoding |
| MSTRG. 113008. 1  |              | XLOC_114908 | 265 coding  | noncoding | noncoding | noncoding |
| MSTRG. 113015. 1  |              | XLOC_114910 | 311 coding  | noncoding | noncoding | noncoding |
| MSTRG. 113146. 1  | UNC5D        | XLOC_114922 | 233 coding  | noncoding | noncoding | noncoding |
| MSTRG. 113123. 1  |              | XLOC_114937 | 235 coding  | noncoding | noncoding | noncoding |
| MSTRG. 113160. 1  |              | XLOC_114946 | 293 coding  | noncoding | noncoding | noncoding |
| NR_134267. 1      | KCNU1        | XLOC_114952 | 3804 coding | coding    | coding    | coding    |
| MSTRG. 113179. 1  |              | XLOC_114958 | 311 coding  | noncoding | noncoding | noncoding |
| MSTRG. 113223. 1  |              | XLOC_114978 | 266 coding  | noncoding | noncoding | noncoding |
| MSTRG. 113269. 1  |              | XLOC_115001 | 287 coding  | noncoding | noncoding | noncoding |
| MSTRG. 113271. 1  |              | XLOC_115002 | 253 coding  | noncoding | noncoding | noncoding |
| MSTRG. 113325. 24 | NSD3         | XLOC_115016 | 1143 coding | coding    | noncoding | noncoding |
| MSTRG. 113350. 1  | FGFR1        | XLOC_115019 | 301 coding  | noncoding | noncoding | noncoding |
| MSTRG. 113317. 1  | LOC105379384 | XLOC_115022 | 242 coding  | noncoding | noncoding | noncoding |
| MSTRG. 113499. 1  |              | XLOC_115043 | 261 coding  | noncoding | noncoding | noncoding |
| MSTRG. 113516. 1  | ADAM9        | XLOC_115057 | 243 coding  | noncoding | noncoding | noncoding |
| MSTRG. 113369. 1  | ADAM32       | XLOC_115063 | 527 coding  | noncoding | noncoding | noncoding |
| MSTRG. 113356. 1  | ADAM18       | XLOC_115068 | 252 coding  | noncoding | noncoding | noncoding |
| XR_949694. 3      | LOC105379385 | XLOC_115079 | 1938 coding | noncoding | noncoding | noncoding |
| MSTRG. 113399. 1  | LOC105379385 | XLOC_115084 | 257 coding  | noncoding | noncoding | noncoding |
| NM_020130. 5      | TCIM         | XLOC_115085 | 1829 coding | coding    | coding    | noncoding |
| MSTRG. 113406. 1  |              | XLOC_115091 | 271 coding  | noncoding | noncoding | noncoding |
| MSTRG. 113437. 1  | ZMAT4        | XLOC_115095 | 257 coding  | noncoding | noncoding | noncoding |
| MSTRG. 113448. 1  | ZMAT4        | XLOC_115106 | 200 coding  | noncoding | noncoding | noncoding |
| NM_032336. 3      | GINS4        | XLOC_115139 | 3770 coding | coding    | coding    | coding    |

|                  |              |             |              |           |           |           |
|------------------|--------------|-------------|--------------|-----------|-----------|-----------|
| MSTRG. 113576. 6 | LOC105379393 | XLOC_115159 | 3870 coding  | coding    | coding    | noncoding |
| MSTRG. 113576. 8 | LOC105379393 | XLOC_115159 | 6337 coding  | coding    | coding    | noncoding |
| MSTRG. 113561. 1 |              | XLOC_115171 | 257 coding   | noncoding | noncoding | noncoding |
| XM_005273491. 5  | IKBKB        | XLOC_115172 | 3992 coding  | coding    | coding    | coding    |
| XR_949402. 3     | IKBKB        | XLOC_115172 | 4346 coding  | coding    | coding    | coding    |
| MSTRG. 113632. 1 | IKBKB        | XLOC_115174 | 316 coding   | noncoding | noncoding | noncoding |
| MSTRG. 113617. 5 | SMIM19       | XLOC_115186 | 706 coding   | coding    | coding    | noncoding |
| NM_138436. 4     | SMIM19       | XLOC_115186 | 3036 coding  | coding    | noncoding | noncoding |
| MSTRG. 113596. 1 |              | XLOC_115192 | 274 coding   | noncoding | noncoding | noncoding |
| MSTRG. 113598. 1 |              | XLOC_115193 | 241 coding   | noncoding | noncoding | noncoding |
| MSTRG. 113682. 1 | LOC105379397 | XLOC_115227 | 206 coding   | noncoding | noncoding | noncoding |
| MSTRG. 113679. 1 |              | XLOC_115228 | 281 coding   | coding    | noncoding | noncoding |
| MSTRG. 113742. 1 |              | XLOC_115254 | 231 coding   | noncoding | noncoding | noncoding |
| MSTRG. 113960. 2 | SPIDR        | XLOC_115266 | 5413 coding  | coding    | coding    | coding    |
| XR_001745508. 2  | SPIDR        | XLOC_115266 | 3664 coding  | coding    | coding    | coding    |
| MSTRG. 113765. 1 | MCM4         | XLOC_115274 | 278 coding   | noncoding | noncoding | noncoding |
| MSTRG. 113783. 1 | UBE2V2       | XLOC_115277 | 345 coding   | noncoding | noncoding | noncoding |
| MSTRG. 113767. 1 |              | XLOC_115279 | 304 coding   | noncoding | noncoding | noncoding |
| MSTRG. 113769. 1 |              | XLOC_115281 | 251 coding   | noncoding | noncoding | noncoding |
| MSTRG. 113770. 1 |              | XLOC_115282 | 220 coding   | noncoding | noncoding | noncoding |
| MSTRG. 113772. 1 |              | XLOC_115284 | 385 coding   | noncoding | noncoding | noncoding |
| MSTRG. 113777. 1 |              | XLOC_115286 | 309 coding   | noncoding | noncoding | noncoding |
| MSTRG. 113785. 1 |              | XLOC_115287 | 212 coding   | noncoding | noncoding | noncoding |
| MSTRG. 113796. 1 | LOC105375821 | XLOC_115293 | 270 coding   | noncoding | noncoding | noncoding |
| MSTRG. 113792. 1 |              | XLOC_115298 | 240 coding   | noncoding | noncoding | noncoding |
| MSTRG. 113820. 1 | LOC105375825 | XLOC_115314 | 331 coding   | noncoding | noncoding | noncoding |
| XR_001745895. 2  | LOC107986942 | XLOC_115317 | 3543 coding  | noncoding | noncoding | noncoding |
| MSTRG. 113838. 1 |              | XLOC_115320 | 228 coding   | noncoding | noncoding | noncoding |
| MSTRG. 113935. 1 | SNTG1        | XLOC_115346 | 210 coding   | noncoding | noncoding | noncoding |
| MSTRG. 113952. 1 | SNTG1        | XLOC_115352 | 224 coding   | noncoding | noncoding | noncoding |
| MSTRG. 113906. 1 |              | XLOC_115356 | 237 coding   | noncoding | coding    | noncoding |
| MSTRG. 113922. 1 |              | XLOC_115364 | 318 coding   | noncoding | noncoding | noncoding |
| MSTRG. 114001. 1 | PXDNL        | XLOC_115385 | 787 coding   | coding    | noncoding | noncoding |
| MSTRG. 114039. 1 |              | XLOC_115406 | 304 coding   | noncoding | noncoding | noncoding |
| MSTRG. 114040. 1 |              | XLOC_115407 | 247 coding   | noncoding | noncoding | noncoding |
| MSTRG. 114044. 1 |              | XLOC_115410 | 248 coding   | noncoding | noncoding | noncoding |
| MSTRG. 114048. 1 |              | XLOC_115415 | 307 coding   | noncoding | noncoding | noncoding |
| MSTRG. 114067. 1 |              | XLOC_115425 | 327 coding   | coding    | noncoding | noncoding |
| MSTRG. 114113. 1 |              | XLOC_115447 | 294 coding   | noncoding | noncoding | noncoding |
| MSTRG. 114123. 1 |              | XLOC_115448 | 359 coding   | noncoding | noncoding | noncoding |
| NM_052898. 2     | XKR4         | XLOC_115467 | 20241 coding | coding    | coding    | coding    |
| MSTRG. 114180. 1 |              | XLOC_115480 | 299 coding   | noncoding | noncoding | noncoding |
| MSTRG. 114257. 1 |              | XLOC_115526 | 269 coding   | coding    | noncoding | noncoding |

|                   |              |             |              |           |           |           |
|-------------------|--------------|-------------|--------------|-----------|-----------|-----------|
| MSTRG. 114276. 1  |              | XLOC_115528 | 234 coding   | noncoding | noncoding | noncoding |
| MSTRG. 114277. 1  |              | XLOC_115529 | 288 coding   | noncoding | noncoding | noncoding |
| MSTRG. 114322. 1  |              | XLOC_115554 | 306 coding   | noncoding | noncoding | noncoding |
| MSTRG. 114324. 1  |              | XLOC_115555 | 255 coding   | noncoding | noncoding | noncoding |
| MSTRG. 114345. 1  | FAM110B      | XLOC_115561 | 208 coding   | noncoding | noncoding | noncoding |
| MSTRG. 114355. 1  |              | XLOC_115567 | 304 coding   | noncoding | noncoding | noncoding |
| NM_001007069. 1   | SDCBP        | XLOC_115584 | 2164 coding  | coding    | coding    | coding    |
| MSTRG. 114417. 1  |              | XLOC_115596 | 245 coding   | coding    | noncoding | noncoding |
| MSTRG. 114449. 1  |              | XLOC_115607 | 278 coding   | noncoding | noncoding | noncoding |
| MSTRG. 114498. 1  | CA8          | XLOC_115628 | 368 coding   | coding    | noncoding | noncoding |
| MSTRG. 114486. 1  |              | XLOC_115638 | 559 coding   | noncoding | coding    | noncoding |
| MSTRG. 114525. 1  | RAB2A        | XLOC_115653 | 301 coding   | noncoding | noncoding | noncoding |
| MSTRG. 114505. 1  |              | XLOC_115662 | 238 coding   | noncoding | coding    | noncoding |
| MSTRG. 115566. 12 | ASPH         | XLOC_115704 | 714 coding   | coding    | coding    | noncoding |
| MSTRG. 114606. 1  | LINC02842    | XLOC_115719 | 286 coding   | noncoding | noncoding | noncoding |
| MSTRG. 114579. 1  |              | XLOC_115722 | 319 coding   | noncoding | noncoding | noncoding |
| XM_011517512. 2   | NKAIN3       | XLOC_115724 | 10026 coding | coding    | coding    | coding    |
| MSTRG. 114632. 1  | NKAIN3       | XLOC_115735 | 268 coding   | noncoding | noncoding | noncoding |
| NR_027378. 1      | NKAIN3-IT1   | XLOC_115738 | 7041 coding  | noncoding | coding    | coding    |
| MSTRG. 114644. 1  |              | XLOC_115755 | 246 coding   | noncoding | noncoding | noncoding |
| MSTRG. 114649. 1  |              | XLOC_115757 | 280 coding   | noncoding | noncoding | noncoding |
| MSTRG. 114651. 1  |              | XLOC_115758 | 200 coding   | noncoding | noncoding | noncoding |
| MSTRG. 114660. 1  |              | XLOC_115766 | 259 coding   | noncoding | noncoding | noncoding |
| MSTRG. 114703. 1  | LINC01414    | XLOC_115776 | 302 coding   | noncoding | noncoding | noncoding |
| MSTRG. 114707. 1  | LINC01414    | XLOC_115778 | 248 coding   | noncoding | noncoding | noncoding |
| NM_152414. 5      | BHLHE22      | XLOC_115787 | 3263 coding  | coding    | coding    | coding    |
| MSTRG. 114721. 1  |              | XLOC_115819 | 257 coding   | noncoding | noncoding | noncoding |
| MSTRG. 114745. 1  |              | XLOC_115833 | 278 coding   | noncoding | noncoding | noncoding |
| MSTRG. 114832. 5  | PDE7A        | XLOC_115843 | 3398 coding  | coding    | noncoding | noncoding |
| MSTRG. 114803. 1  |              | XLOC_115856 | 219 coding   | noncoding | noncoding | noncoding |
| MSTRG. 114825. 1  | TRIM55       | XLOC_115862 | 240 coding   | noncoding | noncoding | noncoding |
| MSTRG. 114920. 2  | VCPIP1       | XLOC_115904 | 4432 coding  | coding    | coding    | noncoding |
| MSTRG. 114939. 1  | PTTG3P       | XLOC_115910 | 228 coding   | coding    | noncoding | noncoding |
| MSTRG. 114940. 1  | C8orf44-SGK3 | XLOC_115911 | 264 coding   | noncoding | noncoding | noncoding |
| MSTRG. 114898. 1  |              | XLOC_115917 | 758 coding   | noncoding | noncoding | noncoding |
| MSTRG. 115073. 2  | COPS5        | XLOC_115920 | 1278 coding  | coding    | noncoding | noncoding |
| MSTRG. 115121. 1  | CPA6         | XLOC_115935 | 291 coding   | noncoding | noncoding | noncoding |
| NM_024870. 4      | PREX2        | XLOC_115941 | 10824 coding | coding    | coding    | coding    |
| MSTRG. 114914. 1  | PREX2        | XLOC_115943 | 216 coding   | noncoding | noncoding | noncoding |
| MSTRG. 114968. 1  | C8orf34      | XLOC_115949 | 216 coding   | noncoding | noncoding | noncoding |
| MSTRG. 114955. 1  |              | XLOC_115950 | 291 coding   | noncoding | noncoding | noncoding |
| MSTRG. 114980. 1  |              | XLOC_115959 | 273 coding   | coding    | noncoding | noncoding |
| MSTRG. 115009. 1  | SLCO5A1      | XLOC_115972 | 602 coding   | noncoding | noncoding | noncoding |

|                  |              |             |              |           |           |           |
|------------------|--------------|-------------|--------------|-----------|-----------|-----------|
| MSTRG. 115011. 1 | SLCO5A1      | XLOC_115974 | 251 coding   | noncoding | noncoding | noncoding |
| MSTRG. 115017. 1 |              | XLOC_115979 | 269 coding   | noncoding | noncoding | noncoding |
| MSTRG. 115026. 1 |              | XLOC_115989 | 224 coding   | noncoding | noncoding | noncoding |
| MSTRG. 115034. 1 |              | XLOC_115990 | 215 coding   | noncoding | noncoding | noncoding |
| XR_001745954. 1  | LOC105375894 | XLOC_116012 | 6464 coding  | noncoding | noncoding | noncoding |
| MSTRG. 115062. 1 |              | XLOC_116016 | 270 coding   | noncoding | noncoding | noncoding |
| MSTRG. 115071. 1 |              | XLOC_116020 | 226 coding   | noncoding | noncoding | noncoding |
| MSTRG. 115189. 1 |              | XLOC_116037 | 230 coding   | noncoding | noncoding | noncoding |
| XM_017013982. 1  | KCNB2        | XLOC_116042 | 10233 coding | coding    | coding    | coding    |
| MSTRG. 115215. 1 | KCNB2        | XLOC_116050 | 298 coding   | noncoding | noncoding | noncoding |
| MSTRG. 115218. 1 | KCNB2        | XLOC_116053 | 226 coding   | noncoding | noncoding | noncoding |
| MSTRG. 115221. 1 | KCNB2        | XLOC_116056 | 265 coding   | noncoding | noncoding | noncoding |
| MSTRG. 115226. 1 |              | XLOC_116067 | 258 coding   | noncoding | noncoding | noncoding |
| MSTRG. 115253. 2 | RPL7         | XLOC_116072 | 1285 coding  | coding    | noncoding | noncoding |
| MSTRG. 115263. 1 | RDH10-AS1    | XLOC_116075 | 225 coding   | noncoding | noncoding | noncoding |
| MSTRG. 115411. 4 | STAU2        | XLOC_116079 | 2171 coding  | coding    | coding    | noncoding |
| MSTRG. 115307. 1 |              | XLOC_116087 | 266 coding   | noncoding | noncoding | noncoding |
| MSTRG. 115466. 1 | LY96         | XLOC_116098 | 663 coding   | noncoding | noncoding | noncoding |
| MSTRG. 115405. 1 | JPH1         | XLOC_116104 | 274 coding   | coding    | noncoding | noncoding |
| MSTRG. 115690. 1 | MIR2052HG    | XLOC_116122 | 310 coding   | noncoding | noncoding | noncoding |
| MSTRG. 115694. 1 |              | XLOC_116126 | 304 coding   | noncoding | noncoding | noncoding |
| MSTRG. 115695. 1 |              | XLOC_116127 | 315 coding   | noncoding | noncoding | noncoding |
| MSTRG. 115724. 1 | CASC9        | XLOC_116135 | 264 coding   | coding    | noncoding | noncoding |
| MSTRG. 115741. 1 |              | XLOC_116146 | 450 coding   | noncoding | noncoding | noncoding |
| MSTRG. 115751. 1 |              | XLOC_116153 | 257 coding   | coding    | noncoding | noncoding |
| MSTRG. 115763. 1 | LOC107986952 | XLOC_116157 | 279 coding   | noncoding | noncoding | noncoding |
| XM_011517594. 2  | ZFHX4        | XLOC_116161 | 13723 coding | coding    | noncoding | coding    |
| MSTRG. 115777. 1 | ZFHX4        | XLOC_116162 | 312 coding   | noncoding | noncoding | noncoding |
| MSTRG. 115797. 1 |              | XLOC_116183 | 276 coding   | noncoding | noncoding | noncoding |
| MSTRG. 115803. 1 |              | XLOC_116186 | 257 coding   | noncoding | noncoding | noncoding |
| MSTRG. 115842. 1 |              | XLOC_116198 | 262 coding   | coding    | noncoding | noncoding |
| MSTRG. 115858. 1 |              | XLOC_116294 | 222 coding   | noncoding | noncoding | noncoding |
| MSTRG. 115864. 1 |              | XLOC_116296 | 340 coding   | noncoding | noncoding | noncoding |
| MSTRG. 115874. 1 |              | XLOC_116302 | 206 coding   | noncoding | noncoding | noncoding |
| MSTRG. 115898. 1 | LOC101927040 | XLOC_116314 | 268 coding   | noncoding | noncoding | noncoding |
| MSTRG. 115903. 1 | LOC105375920 | XLOC_116325 | 281 coding   | noncoding | noncoding | noncoding |
| MSTRG. 115915. 1 | LOC105375922 | XLOC_116328 | 305 coding   | noncoding | noncoding | noncoding |
| MSTRG. 115918. 1 | LOC105375922 | XLOC_116329 | 202 coding   | noncoding | noncoding | noncoding |
| MSTRG. 115914. 1 |              | XLOC_116331 | 297 coding   | noncoding | noncoding | noncoding |
| MSTRG. 115913. 1 |              | XLOC_116332 | 262 coding   | noncoding | noncoding | noncoding |
| MSTRG. 115946. 1 | ZNF704       | XLOC_116342 | 207 coding   | noncoding | noncoding | noncoding |
| MSTRG. 116232. 1 |              | XLOC_116387 | 293 coding   | noncoding | noncoding | noncoding |
| MSTRG. 116248. 1 |              | XLOC_116391 | 276 coding   | noncoding | noncoding | noncoding |

|                  |              |             |             |           |           |           |
|------------------|--------------|-------------|-------------|-----------|-----------|-----------|
| MSTRG. 116258. 1 |              | XLOC_116398 | 226 coding  | noncoding | noncoding | noncoding |
| MSTRG. 116289. 1 | LOC105375931 | XLOC_116410 | 380 coding  | noncoding | noncoding | noncoding |
| MSTRG. 116319. 1 |              | XLOC_116428 | 236 coding  | coding    | noncoding | noncoding |
| MSTRG. 116324. 1 |              | XLOC_116433 | 311 coding  | noncoding | noncoding | noncoding |
| MSTRG. 116380. 1 | RALYL        | XLOC_116457 | 250 coding  | noncoding | noncoding | noncoding |
| MSTRG. 116437. 1 |              | XLOC_116480 | 362 coding  | noncoding | noncoding | coding    |
| XM_005251121. 2  | LOC101929601 | XLOC_116481 | 2084 coding | coding    | coding    | coding    |
| MSTRG. 116448. 1 |              | XLOC_116482 | 998 coding  | noncoding | noncoding | noncoding |
| MSTRG. 116459. 1 |              | XLOC_116487 | 217 coding  | noncoding | noncoding | noncoding |
| NM_152565. 1     | ATP6V0D2     | XLOC_116489 | 2370 coding | coding    | coding    | coding    |
| MSTRG. 116466. 1 | ATP6V0D2     | XLOC_116490 | 281 coding  | noncoding | noncoding | noncoding |
| MSTRG. 116462. 1 | ATP6V0D2     | XLOC_116491 | 279 coding  | noncoding | noncoding | noncoding |
| MSTRG. 116473. 1 | SLC7A13      | XLOC_116494 | 238 coding  | noncoding | noncoding | noncoding |
| MSTRG. 116475. 1 |              | XLOC_116495 | 278 coding  | noncoding | noncoding | noncoding |
| MSTRG. 116477. 1 |              | XLOC_116496 | 383 coding  | noncoding | noncoding | noncoding |
| MSTRG. 116496. 1 | CNBD1        | XLOC_116529 | 223 coding  | noncoding | noncoding | noncoding |
| MSTRG. 116511. 1 |              | XLOC_116542 | 363 coding  | noncoding | coding    | noncoding |
| MSTRG. 116512. 1 |              | XLOC_116543 | 292 coding  | noncoding | noncoding | noncoding |
| MSTRG. 116522. 1 | MMP16        | XLOC_116549 | 236 coding  | noncoding | noncoding | noncoding |
| MSTRG. 116553. 1 | LOC105375630 | XLOC_116551 | 297 coding  | noncoding | noncoding | noncoding |
| XM_011517357. 2  | RIPK2        | XLOC_116597 | 1912 coding | coding    | coding    | coding    |
| MSTRG. 116700. 1 |              | XLOC_116688 | 259 coding  | noncoding | noncoding | noncoding |
| NM_001129890. 1  | LRRC69       | XLOC_116705 | 1323 coding | coding    | coding    | coding    |
| NM_001282356. 2  | SLC26A7      | XLOC_116705 | 5305 coding | coding    | coding    | coding    |
| MSTRG. 116885. 1 | LRRC69       | XLOC_116709 | 300 coding  | noncoding | noncoding | noncoding |
| MSTRG. 116720. 1 |              | XLOC_116721 | 241 coding  | noncoding | noncoding | noncoding |
| MSTRG. 116723. 1 |              | XLOC_116723 | 313 coding  | noncoding | noncoding | noncoding |
| MSTRG. 116779. 1 | FLJ46284     | XLOC_116735 | 284 coding  | noncoding | noncoding | noncoding |
| MSTRG. 116780. 1 | FLJ46284     | XLOC_116736 | 307 coding  | noncoding | noncoding | noncoding |
| MSTRG. 116969. 1 | TMEM67       | XLOC_116777 | 241 coding  | noncoding | noncoding | noncoding |
| MSTRG. 116985. 1 |              | XLOC_116786 | 294 coding  | noncoding | noncoding | noncoding |
| MSTRG. 117040. 1 |              | XLOC_116822 | 262 coding  | noncoding | noncoding | noncoding |
| MSTRG. 117046. 1 | ESRP1        | XLOC_116825 | 294 coding  | noncoding | noncoding | noncoding |
| MSTRG. 117044. 1 |              | XLOC_116826 | 282 coding  | noncoding | noncoding | noncoding |
| MSTRG. 117050. 1 |              | XLOC_116828 | 299 coding  | noncoding | noncoding | noncoding |
| MSTRG. 117052. 1 |              | XLOC_116829 | 318 coding  | noncoding | noncoding | noncoding |
| MSTRG. 117132. 1 | NDUFAF6      | XLOC_116838 | 284 coding  | noncoding | noncoding | noncoding |
| MSTRG. 117188. 1 | C8orf37-AS1  | XLOC_116863 | 253 coding  | coding    | noncoding | noncoding |
| MSTRG. 117208. 1 | C8orf37-AS1  | XLOC_116867 | 221 coding  | noncoding | noncoding | noncoding |
| MSTRG. 117221. 1 | C8orf37-AS1  | XLOC_116869 | 290 coding  | noncoding | noncoding | noncoding |
| MSTRG. 117089. 1 |              | XLOC_116870 | 270 coding  | noncoding | noncoding | noncoding |
| MSTRG. 117102. 1 |              | XLOC_116880 | 318 coding  | noncoding | noncoding | noncoding |
| MSTRG. 117237. 1 |              | XLOC_116892 | 266 coding  | noncoding | noncoding | noncoding |

|                   |              |             |              |           |           |           |
|-------------------|--------------|-------------|--------------|-----------|-----------|-----------|
| MSTRG. 117225. 1  |              | XLOC_116893 | 294 coding   | noncoding | noncoding | noncoding |
| MSTRG. 117685. 1  | LOC101927066 | XLOC_116967 | 299 coding   | noncoding | noncoding | noncoding |
| MSTRG. 117694. 1  | LOC101927066 | XLOC_116974 | 259 coding   | noncoding | noncoding | noncoding |
| MSTRG. 117255. 1  |              | XLOC_116977 | 309 coding   | noncoding | noncoding | noncoding |
| MSTRG. 117261. 1  |              | XLOC_116981 | 477 coding   | noncoding | noncoding | noncoding |
| MSTRG. 117264. 1  |              | XLOC_116991 | 291 coding   | noncoding | noncoding | noncoding |
| MSTRG. 117289. 1  | MATN2        | XLOC_116996 | 277 coding   | noncoding | noncoding | noncoding |
| MSTRG. 117283. 1  | ERICH5       | XLOC_117003 | 212 coding   | noncoding | noncoding | noncoding |
| MSTRG. 117529. 1  | STK3         | XLOC_117023 | 351 coding   | noncoding | noncoding | noncoding |
| MSTRG. 117331. 1  |              | XLOC_117031 | 263 coding   | noncoding | noncoding | noncoding |
| MSTRG. 117344. 1  | RGS22        | XLOC_117034 | 281 coding   | coding    | noncoding | noncoding |
| MSTRG. 117346. 1  | RGS22        | XLOC_117035 | 229 coding   | noncoding | noncoding | noncoding |
| MSTRG. 117335. 1  |              | XLOC_117038 | 271 coding   | noncoding | noncoding | noncoding |
| MSTRG. 117400. 1  | SNX31        | XLOC_117064 | 370 coding   | noncoding | noncoding | noncoding |
| MSTRG. 117422. 1  |              | XLOC_117076 | 559 coding   | noncoding | noncoding | noncoding |
| MSTRG. 117445. 11 | YWHAZ        | XLOC_117081 | 3315 coding  | coding    | noncoding | noncoding |
| MSTRG. 117445. 10 | YWHAZ        | XLOC_117081 | 3714 coding  | coding    | noncoding | noncoding |
| MSTRG. 117430. 1  |              | XLOC_117082 | 266 coding   | noncoding | noncoding | noncoding |
| MSTRG. 117436. 1  |              | XLOC_117088 | 263 coding   | noncoding | noncoding | noncoding |
| NR_002182. 1      | NACA4P       | XLOC_117095 | 703 coding   | coding    | noncoding | coding    |
| XM_024447286. 1   | GRHL2        | XLOC_117099 | 3092 coding  | noncoding | coding    | coding    |
| MSTRG. 117551. 1  |              | XLOC_117115 | 459 coding   | noncoding | noncoding | noncoding |
| MSTRG. 117554. 1  |              | XLOC_117116 | 240 coding   | noncoding | noncoding | noncoding |
| MSTRG. 117562. 1  |              | XLOC_117121 | 212 coding   | noncoding | noncoding | noncoding |
| MSTRG. 117563. 1  |              | XLOC_117122 | 263 coding   | noncoding | noncoding | noncoding |
| MSTRG. 117804. 1  | AZIN1        | XLOC_117131 | 4628 coding  | coding    | noncoding | noncoding |
| MSTRG. 117709. 1  | LINC01181    | XLOC_117150 | 461 coding   | noncoding | noncoding | noncoding |
| MSTRG. 117727. 1  |              | XLOC_117186 | 360 coding   | noncoding | noncoding | noncoding |
| MSTRG. 117597. 1  |              | XLOC_117188 | 269 coding   | noncoding | noncoding | noncoding |
| NM_001348484. 2   | RIMS2        | XLOC_117191 | 9375 coding  | coding    | coding    | coding    |
| MSTRG. 117923. 1  | RIMS2        | XLOC_117193 | 217 coding   | noncoding | noncoding | noncoding |
| XM_011516947. 3   | ZFPM2        | XLOC_117224 | 11424 coding | noncoding | coding    | coding    |
| MSTRG. 117999. 1  | ZFPM2-AS1    | XLOC_117233 | 229 coding   | noncoding | noncoding | noncoding |
| XM_017013590. 1   | OXR1         | XLOC_117239 | 4211 coding  | coding    | coding    | coding    |
| MSTRG. 118160. 1  | OXR1         | XLOC_117264 | 247 coding   | noncoding | noncoding | noncoding |
| MSTRG. 118009. 1  | ABRA         | XLOC_117272 | 254 coding   | noncoding | noncoding | noncoding |
| MSTRG. 118015. 1  |              | XLOC_117275 | 276 coding   | noncoding | noncoding | noncoding |
| MSTRG. 118022. 1  |              | XLOC_117278 | 267 coding   | noncoding | noncoding | noncoding |
| MSTRG. 118043. 1  |              | XLOC_117288 | 292 coding   | noncoding | noncoding | noncoding |
| MSTRG. 118049. 1  |              | XLOC_117290 | 261 coding   | noncoding | noncoding | noncoding |
| MSTRG. 118054. 1  |              | XLOC_117291 | 294 coding   | noncoding | noncoding | noncoding |
| MSTRG. 118065. 1  | RSPO2        | XLOC_117295 | 252 coding   | noncoding | noncoding | noncoding |
| MSTRG. 118070. 1  | RSPO2        | XLOC_117298 | 243 coding   | noncoding | noncoding | noncoding |

|                  |              |             |             |           |           |           |
|------------------|--------------|-------------|-------------|-----------|-----------|-----------|
| MSTRG. 118071. 1 | RSPO2        | XLOC_117299 | 224 coding  | noncoding | noncoding | noncoding |
| MSTRG. 118060. 1 |              | XLOC_117300 | 284 coding  | coding    | noncoding | noncoding |
| MSTRG. 118176. 1 |              | XLOC_117320 | 457 coding  | noncoding | noncoding | noncoding |
| MSTRG. 118308. 1 | PKHD1L1      | XLOC_117361 | 344 coding  | noncoding | noncoding | noncoding |
| MSTRG. 118316. 1 | PKHD1L1      | XLOC_117363 | 289 coding  | noncoding | noncoding | noncoding |
| MSTRG. 118273. 1 |              | XLOC_117373 | 251 coding  | noncoding | noncoding | noncoding |
| MSTRG. 118324. 1 |              | XLOC_117387 | 296 coding  | noncoding | noncoding | noncoding |
| MSTRG. 118383. 1 |              | XLOC_117410 | 268 coding  | noncoding | noncoding | noncoding |
| MSTRG. 118385. 1 |              | XLOC_117411 | 221 coding  | noncoding | noncoding | noncoding |
| MSTRG. 118410. 1 | CSMD3        | XLOC_117412 | 318 coding  | noncoding | noncoding | noncoding |
| MSTRG. 118431. 1 | CSMD3        | XLOC_117421 | 256 coding  | coding    | noncoding | noncoding |
| MSTRG. 118434. 1 | CSMD3        | XLOC_117422 | 213 coding  | noncoding | noncoding | noncoding |
| MSTRG. 118391. 1 |              | XLOC_117438 | 242 coding  | noncoding | noncoding | noncoding |
| MSTRG. 118466. 1 |              | XLOC_117447 | 511 coding  | noncoding | noncoding | noncoding |
| MSTRG. 118460. 1 |              | XLOC_117451 | 337 coding  | noncoding | noncoding | noncoding |
| MSTRG. 118472. 1 |              | XLOC_117454 | 280 coding  | noncoding | noncoding | noncoding |
| MSTRG. 118455. 1 |              | XLOC_117455 | 276 coding  | noncoding | noncoding | noncoding |
| MSTRG. 118501. 1 |              | XLOC_117469 | 250 coding  | noncoding | noncoding | noncoding |
| MSTRG. 118518. 1 |              | XLOC_117491 | 236 coding  | noncoding | noncoding | noncoding |
| XR_002956724. 1  | LOC112268030 | XLOC_117507 | 3497 coding | coding    | noncoding | noncoding |
| MSTRG. 118566. 1 |              | XLOC_117509 | 261 coding  | noncoding | noncoding | noncoding |
| NM_001172811. 2  | SLC30A8      | XLOC_117512 | 5372 coding | coding    | coding    | coding    |
| MSTRG. 118637. 1 | LOC105375716 | XLOC_117523 | 359 coding  | noncoding | coding    | noncoding |
| MSTRG. 118988. 1 | SAMD12       | XLOC_117545 | 261 coding  | noncoding | noncoding | noncoding |
| MSTRG. 118721. 1 |              | XLOC_117636 | 348 coding  | noncoding | noncoding | noncoding |
| MSTRG. 118722. 1 |              | XLOC_117637 | 263 coding  | noncoding | noncoding | noncoding |
| MSTRG. 118732. 1 |              | XLOC_117648 | 255 coding  | noncoding | noncoding | noncoding |
| MSTRG. 118733. 1 |              | XLOC_117649 | 285 coding  | noncoding | noncoding | noncoding |
| MSTRG. 118738. 1 |              | XLOC_117653 | 238 coding  | noncoding | noncoding | noncoding |
| MSTRG. 118753. 1 | ENPP2        | XLOC_117659 | 225 coding  | noncoding | noncoding | noncoding |
| MSTRG. 118757. 1 | ENPP2        | XLOC_117663 | 686 coding  | noncoding | noncoding | noncoding |
| MSTRG. 118785. 4 | TAF2         | XLOC_117667 | 478 coding  | noncoding | noncoding | noncoding |
| NM_022783. 4     | DEPTOR       | XLOC_117671 | 2569 coding | coding    | coding    | coding    |
| MSTRG. 118767. 1 | DEPTOR       | XLOC_117673 | 346 coding  | noncoding | noncoding | noncoding |
| MSTRG. 118771. 1 | DEPTOR       | XLOC_117674 | 422 coding  | noncoding | noncoding | noncoding |
| XR_928593. 3     | LOC105375730 | XLOC_117675 | 3227 coding | noncoding | noncoding | noncoding |
| XM_005251059. 4  | COL14A1      | XLOC_117677 | 8819 coding | coding    | coding    | coding    |
| MSTRG. 118778. 1 | COL14A1      | XLOC_117679 | 276 coding  | noncoding | noncoding | noncoding |
| MSTRG. 118877. 1 |              | XLOC_117706 | 282 coding  | noncoding | noncoding | noncoding |
| MSTRG. 118903. 1 |              | XLOC_117718 | 233 coding  | noncoding | noncoding | noncoding |
| MSTRG. 118925. 1 | HAS2         | XLOC_117724 | 261 coding  | noncoding | noncoding | noncoding |
| MSTRG. 118931. 1 |              | XLOC_117727 | 300 coding  | noncoding | noncoding | noncoding |
| MSTRG. 119288. 1 | ZHX2         | XLOC_117760 | 431 coding  | noncoding | noncoding | noncoding |

|                   |              |             |              |           |           |           |
|-------------------|--------------|-------------|--------------|-----------|-----------|-----------|
| MSTRG. 119306. 1  | ZHX2         | XLOC_117777 | 231 coding   | noncoding | noncoding | noncoding |
| MSTRG. 119178. 4  | ZHX1         | XLOC_117786 | 727 coding   | coding    | noncoding | noncoding |
| MSTRG. 119209. 1  | KLHL38       | XLOC_117798 | 304 coding   | coding    | noncoding | noncoding |
| MSTRG. 119245. 1  | FER1L6-AS1   | XLOC_117819 | 308 coding   | noncoding | noncoding | noncoding |
| MSTRG. 119249. 1  | FER1L6-AS2   | XLOC_117822 | 231 coding   | noncoding | noncoding | noncoding |
| MSTRG. 119262. 1  | LOC101927588 | XLOC_117830 | 221 coding   | noncoding | noncoding | noncoding |
| MSTRG. 119390. 1  | NDUFB9       | XLOC_117854 | 281 coding   | noncoding | noncoding | noncoding |
| MSTRG. 119445. 1  | NSMCE2       | XLOC_117892 | 294 coding   | noncoding | noncoding | noncoding |
| MSTRG. 119358. 1  |              | XLOC_117896 | 779 coding   | noncoding | noncoding | noncoding |
| MSTRG. 119377. 1  |              | XLOC_117936 | 775 coding   | noncoding | coding    | noncoding |
| MSTRG. 119414. 1  |              | XLOC_117940 | 261 coding   | noncoding | noncoding | noncoding |
| MSTRG. 119411. 1  |              | XLOC_117942 | 272 coding   | noncoding | noncoding | noncoding |
| MSTRG. 120461. 1  | LOC105375751 | XLOC_117957 | 244 coding   | noncoding | noncoding | noncoding |
| MSTRG. 119532. 1  |              | XLOC_118072 | 284 coding   | noncoding | noncoding | noncoding |
| MSTRG. 119650. 1  |              | XLOC_118135 | 227 coding   | noncoding | noncoding | noncoding |
| MSTRG. 119653. 1  |              | XLOC_118140 | 279 coding   | noncoding | noncoding | noncoding |
| MSTRG. 119670. 1  | LOC105375760 | XLOC_118156 | 290 coding   | noncoding | noncoding | noncoding |
| XM_011517076. 1   | PHF20L1      | XLOC_118253 | 6247 coding  | coding    | coding    | coding    |
| MSTRG. 120045. 18 | SLA          | XLOC_118278 | 3797 coding  | coding    | coding    | noncoding |
| MSTRG. 119934. 1  |              | XLOC_118298 | 288 coding   | noncoding | noncoding | noncoding |
| MSTRG. 119970. 1  |              | XLOC_118312 | 225 coding   | noncoding | noncoding | noncoding |
| MSTRG. 120008. 1  |              | XLOC_118328 | 267 coding   | noncoding | noncoding | noncoding |
| MSTRG. 120009. 1  |              | XLOC_118329 | 293 coding   | noncoding | noncoding | noncoding |
| MSTRG. 120102. 1  |              | XLOC_118340 | 223 coding   | noncoding | noncoding | noncoding |
| MSTRG. 120118. 1  |              | XLOC_118341 | 248 coding   | noncoding | noncoding | noncoding |
| NM_006558. 3      | KHDRBS3      | XLOC_118347 | 1978 coding  | coding    | coding    | coding    |
| MSTRG. 120237. 1  | LINC02055    | XLOC_118370 | 231 coding   | noncoding | noncoding | noncoding |
| MSTRG. 120259. 1  | LINC02055    | XLOC_118371 | 298 coding   | noncoding | noncoding | noncoding |
| MSTRG. 120265. 1  | LINC02055    | XLOC_118375 | 271 coding   | noncoding | noncoding | noncoding |
| MSTRG. 120195. 1  |              | XLOC_118384 | 246 coding   | noncoding | noncoding | noncoding |
| MSTRG. 120200. 1  |              | XLOC_118386 | 323 coding   | noncoding | noncoding | noncoding |
| MSTRG. 120214. 1  | LOC401478    | XLOC_118393 | 257 coding   | noncoding | noncoding | noncoding |
| MSTRG. 120215. 1  | LOC401478    | XLOC_118394 | 308 coding   | noncoding | noncoding | noncoding |
| MSTRG. 120286. 1  | FAM135B      | XLOC_118396 | 314 coding   | noncoding | noncoding | noncoding |
| MSTRG. 120345. 1  | COL22A1      | XLOC_118409 | 237 coding   | noncoding | noncoding | noncoding |
| MSTRG. 120307. 1  |              | XLOC_118415 | 276 coding   | noncoding | noncoding | noncoding |
| MSTRG. 120310. 1  |              | XLOC_118416 | 261 coding   | noncoding | noncoding | noncoding |
| MSTRG. 120319. 1  |              | XLOC_118420 | 315 coding   | noncoding | noncoding | noncoding |
| MSTRG. 121056. 2  | TRAPPC9      | XLOC_118429 | 3249 coding  | coding    | coding    | coding    |
| MSTRG. 120718. 3  | AGO2         | XLOC_118446 | 14316 coding | coding    | coding    | coding    |
| MSTRG. 120745. 5  | PTK2         | XLOC_118449 | 344 coding   | noncoding | noncoding | noncoding |
| MSTRG. 120727. 1  | LOC105375783 | XLOC_118451 | 247 coding   | noncoding | noncoding | noncoding |
| MSTRG. 120945. 2  | LOC105375787 | XLOC_118467 | 8469 coding  | coding    | coding    | coding    |

|                |              |             |             |           |           |           |
|----------------|--------------|-------------|-------------|-----------|-----------|-----------|
| MSTRG.120807.1 |              | XLOC_118522 | 257 coding  | noncoding | noncoding | noncoding |
| MSTRG.120971.1 |              | XLOC_118577 | 233 coding  | noncoding | noncoding | noncoding |
| MSTRG.121000.1 | ZC3H3        | XLOC_118588 | 448 coding  | noncoding | noncoding | noncoding |
| MSTRG.121115.1 | PLEC         | XLOC_118623 | 5695 coding | coding    | coding    | coding    |
| MSTRG.121115.2 | PLEC         | XLOC_118623 | 874 coding  | noncoding | coding    | noncoding |
| NM_000837.1    | GRINA        | XLOC_118625 | 1968 coding | coding    | coding    | coding    |
| MSTRG.121099.1 | SPATC1       | XLOC_118627 | 299 coding  | noncoding | noncoding | noncoding |
| MSTRG.121105.1 | OPLAH        | XLOC_118631 | 333 coding  | noncoding | coding    | noncoding |
| MSTRG.121132.2 | MAF1         | XLOC_118641 | 2428 coding | coding    | coding    | noncoding |
| MSTRG.121135.3 | WDR97        | XLOC_118642 | 261 coding  | noncoding | noncoding | noncoding |
| MSTRG.121128.3 | HGH1         | XLOC_118643 | 360 coding  | noncoding | noncoding | noncoding |
| NM_032450.2    | MROH1        | XLOC_118645 | 5363 coding | coding    | coding    | coding    |
| MSTRG.121196.8 | PPP1R16A     | XLOC_118666 | 285 coding  | noncoding | noncoding | noncoding |
| MSTRG.121218.1 | ARHGAP39     | XLOC_118675 | 305 coding  | noncoding | noncoding | noncoding |
| MSTRG.121225.4 | RPL8         | XLOC_118679 | 1009 coding | coding    | coding    | coding    |
| XM_017013384.2 | ZNF517       | XLOC_118681 | 6252 coding | coding    | coding    | coding    |
| XM_017013815.2 | ZNF7         | XLOC_118682 | 2801 coding | coding    | coding    | coding    |
| XM_011534735.3 | ERICH1       | XLOC_118724 | 4724 coding | noncoding | coding    | coding    |
| MSTRG.110944.2 | LOC107986865 | XLOC_118769 | 947 coding  | noncoding | noncoding | noncoding |
| MSTRG.111029.1 | LOC105377791 | XLOC_118791 | 311 coding  | noncoding | noncoding | noncoding |
| MSTRG.111031.1 | CSMD1        | XLOC_118792 | 273 coding  | noncoding | noncoding | noncoding |
| MSTRG.111036.1 | CSMD1        | XLOC_118794 | 297 coding  | noncoding | noncoding | noncoding |
| MSTRG.111059.1 | CSMD1        | XLOC_118806 | 299 coding  | noncoding | noncoding | noncoding |
| MSTRG.110964.1 |              | XLOC_118818 | 243 coding  | noncoding | noncoding | noncoding |
| MSTRG.110980.1 |              | XLOC_118826 | 238 coding  | noncoding | noncoding | noncoding |
| MSTRG.111009.1 |              | XLOC_118844 | 371 coding  | noncoding | noncoding | noncoding |
| XM_011534750.3 | XKR5         | XLOC_118858 | 3812 coding | coding    | coding    | coding    |
| MSTRG.111082.1 | GS1-24F4.2   | XLOC_118859 | 312 coding  | noncoding | coding    | noncoding |
| NR_027000.1    | LINC00965    | XLOC_118878 | 2874 coding | noncoding | coding    | noncoding |
| MSTRG.111404.1 | GATA4        | XLOC_119065 | 320 coding  | noncoding | noncoding | noncoding |
| NM_147780.4    | CTSB         | XLOC_119068 | 3895 coding | coding    | coding    | coding    |
| MSTRG.111410.1 |              | XLOC_119069 | 270 coding  | noncoding | noncoding | noncoding |
| XM_017013724.1 | DEFB134      | XLOC_119072 | 1806 coding | noncoding | noncoding | noncoding |
| MSTRG.111421.1 | FAM86B1      | XLOC_119080 | 289 coding  | noncoding | noncoding | noncoding |
| MSTRG.111482.1 |              | XLOC_119129 | 240 coding  | noncoding | noncoding | noncoding |
| MSTRG.111476.1 |              | XLOC_119132 | 229 coding  | noncoding | noncoding | noncoding |
| MSTRG.111552.1 | TUSC3        | XLOC_119150 | 233 coding  | coding    | noncoding | noncoding |
| MSTRG.111589.1 |              | XLOC_119176 | 323 coding  | noncoding | noncoding | noncoding |
| MSTRG.111645.1 | PDGFRL       | XLOC_119214 | 251 coding  | noncoding | noncoding | noncoding |
| NM_001001924.2 | MTUS1        | XLOC_119215 | 6419 coding | noncoding | coding    | coding    |
| MSTRG.111660.1 | MTUS1        | XLOC_119218 | 250 coding  | noncoding | noncoding | noncoding |
| MSTRG.111662.1 | MTUS1        | XLOC_119220 | 257 coding  | noncoding | noncoding | noncoding |
| MSTRG.111665.1 | MTUS1        | XLOC_119221 | 244 coding  | noncoding | noncoding | noncoding |

|                   |              |             |              |           |           |           |
|-------------------|--------------|-------------|--------------|-----------|-----------|-----------|
| MSTRG. 111764. 12 | PCM1         | XLOC_119227 | 6470 coding  | coding    | coding    | noncoding |
| MSTRG. 111764. 15 | PCM1         | XLOC_119227 | 7123 coding  | coding    | coding    | noncoding |
| MSTRG. 111706. 1  |              | XLOC_119245 | 465 coding   | noncoding | noncoding | noncoding |
| MSTRG. 111759. 1  | PSD3         | XLOC_119253 | 217 coding   | noncoding | noncoding | noncoding |
| MSTRG. 111762. 1  | PSD3         | XLOC_119254 | 271 coding   | noncoding | noncoding | noncoding |
| MSTRG. 111728. 1  | LOC105379300 | XLOC_119260 | 209 coding   | noncoding | noncoding | noncoding |
| MSTRG. 111937. 1  | CSGALNACT1   | XLOC_119265 | 293 coding   | noncoding | noncoding | noncoding |
| MSTRG. 111800. 1  | LOC107986921 | XLOC_119304 | 260 coding   | noncoding | noncoding | noncoding |
| NM_001362884. 2   | LZTS1        | XLOC_119317 | 6010 coding  | coding    | coding    | coding    |
| MSTRG. 111858. 1  | LOC105379315 | XLOC_119326 | 272 coding   | noncoding | noncoding | noncoding |
| MSTRG. 111893. 1  |              | XLOC_119340 | 307 coding   | noncoding | noncoding | noncoding |
| MSTRG. 111976. 1  | NPM2         | XLOC_119353 | 263 coding   | noncoding | noncoding | noncoding |
| MSTRG. 112003. 1  | BMP1         | XLOC_119370 | 286 coding   | noncoding | noncoding | noncoding |
| MSTRG. 112004. 1  | BMP1         | XLOC_119371 | 289 coding   | coding    | noncoding | noncoding |
| XM_017014102. 2   | PHYHIP       | XLOC_119374 | 3476 coding  | noncoding | coding    | coding    |
| NR_160769. 1      | LOC107986876 | XLOC_119398 | 1868 coding  | coding    | coding    | noncoding |
| MSTRG. 112099. 1  | BIN3         | XLOC_119405 | 227 coding   | noncoding | noncoding | noncoding |
| NM_001363233. 1   | PEBP4        | XLOC_119413 | 931 coding   | coding    | coding    | coding    |
| MSTRG. 112077. 1  | LOC107986925 | XLOC_119415 | 261 coding   | noncoding | noncoding | noncoding |
| MSTRG. 112309. 1  | ADAM7        | XLOC_119502 | 243 coding   | noncoding | noncoding | noncoding |
| MSTRG. 112250. 1  |              | XLOC_119513 | 389 coding   | noncoding | noncoding | noncoding |
| MSTRG. 112256. 1  |              | XLOC_119516 | 275 coding   | noncoding | noncoding | noncoding |
| MSTRG. 112460. 8  | DOCK5        | XLOC_119520 | 9669 coding  | coding    | coding    | noncoding |
| MSTRG. 112460. 9  | DOCK5        | XLOC_119520 | 9435 coding  | coding    | coding    | noncoding |
| MSTRG. 112460. 23 | DOCK5        | XLOC_119520 | 3661 coding  | coding    | noncoding | coding    |
| MSTRG. 112327. 1  | CDCA2        | XLOC_119526 | 288 coding   | noncoding | noncoding | noncoding |
| MSTRG. 112340. 1  | LOC107986933 | XLOC_119532 | 320 coding   | noncoding | noncoding | noncoding |
| MSTRG. 112349. 1  | EBF2         | XLOC_119536 | 315 coding   | noncoding | noncoding | noncoding |
| MSTRG. 112389. 1  | DPYSL2       | XLOC_119577 | 258 coding   | coding    | noncoding | noncoding |
| MSTRG. 112379. 1  |              | XLOC_119579 | 262 coding   | noncoding | noncoding | noncoding |
| XM_017013095. 1   | ADRA1A       | XLOC_119580 | 16509 coding | coding    | coding    | coding    |
| MSTRG. 112395. 1  |              | XLOC_119587 | 521 coding   | coding    | coding    | noncoding |
| MSTRG. 112410. 1  | LOC105379340 | XLOC_119592 | 248 coding   | noncoding | noncoding | noncoding |
| XM_005273652. 4   | STMN4        | XLOC_119594 | 1813 coding  | coding    | coding    | coding    |
| MSTRG. 112581. 1  | SCARA3       | XLOC_119613 | 217 coding   | noncoding | noncoding | noncoding |
| MSTRG. 112584. 1  | SCARA3       | XLOC_119615 | 259 coding   | noncoding | noncoding | noncoding |
| MSTRG. 112601. 1  | NUGGC        | XLOC_119630 | 333 coding   | noncoding | noncoding | noncoding |
| MSTRG. 112620. 1  | PNOC         | XLOC_119637 | 273 coding   | noncoding | noncoding | noncoding |
| MSTRG. 112642. 1  | FBXO16       | XLOC_119643 | 277 coding   | noncoding | noncoding | noncoding |
| MSTRG. 112859. 1  | EXTL3        | XLOC_119658 | 305 coding   | noncoding | noncoding | noncoding |
| MSTRG. 112863. 1  | EXTL3        | XLOC_119660 | 274 coding   | noncoding | noncoding | noncoding |
| MSTRG. 112866. 1  | EXTL3        | XLOC_119662 | 314 coding   | noncoding | noncoding | noncoding |
| MSTRG. 112887. 1  | INTS9        | XLOC_119677 | 211 coding   | noncoding | noncoding | noncoding |

|                   |              |             |              |           |           |           |
|-------------------|--------------|-------------|--------------|-----------|-----------|-----------|
| MSTRG. 112930. 1  | KIF13B       | XLOC_119692 | 311 coding   | noncoding | noncoding | noncoding |
| NM_057158. 3      | DUSP4        | XLOC_119695 | 6436 coding  | coding    | coding    | coding    |
| MSTRG. 112673. 1  |              | XLOC_119699 | 245 coding   | noncoding | noncoding | noncoding |
| MSTRG. 112690. 1  |              | XLOC_119710 | 445 coding   | noncoding | noncoding | noncoding |
| MSTRG. 112743. 2  | DCTN6        | XLOC_119732 | 1074 coding  | coding    | coding    | noncoding |
| MSTRG. 112743. 10 | DCTN6        | XLOC_119732 | 902 coding   | coding    | noncoding | noncoding |
| MSTRG. 112724. 1  |              | XLOC_119736 | 321 coding   | noncoding | noncoding | noncoding |
| MSTRG. 112726. 1  |              | XLOC_119737 | 309 coding   | noncoding | noncoding | noncoding |
| MSTRG. 112735. 1  |              | XLOC_119743 | 258 coding   | noncoding | noncoding | noncoding |
| MSTRG. 112756. 1  | UBXN8        | XLOC_119759 | 232 coding   | coding    | noncoding | noncoding |
| XM_011544593. 3   | TEX15        | XLOC_119764 | 12140 coding | coding    | coding    | coding    |
| MSTRG. 112772. 1  |              | XLOC_119767 | 511 coding   | noncoding | noncoding | noncoding |
| MSTRG. 112806. 1  | LOC101929492 | XLOC_119772 | 795 coding   | noncoding | noncoding | noncoding |
| MSTRG. 112808. 1  |              | XLOC_119774 | 250 coding   | noncoding | noncoding | noncoding |
| MSTRG. 112826. 1  |              | XLOC_119830 | 329 coding   | noncoding | noncoding | noncoding |
| MSTRG. 112846. 1  | LOC105379362 | XLOC_119841 | 217 coding   | noncoding | noncoding | noncoding |
| MSTRG. 112947. 1  | FUT10        | XLOC_119855 | 265 coding   | noncoding | noncoding | noncoding |
| MSTRG. 112952. 1  |              | XLOC_119857 | 218 coding   | noncoding | noncoding | noncoding |
| MSTRG. 112969. 1  | RNF122       | XLOC_119863 | 404 coding   | noncoding | noncoding | noncoding |
| MSTRG. 112961. 1  |              | XLOC_119869 | 231 coding   | noncoding | noncoding | noncoding |
| MSTRG. 112972. 1  |              | XLOC_119873 | 282 coding   | coding    | noncoding | noncoding |
| MSTRG. 112973. 1  |              | XLOC_119874 | 374 coding   | noncoding | noncoding | noncoding |
| MSTRG. 112985. 1  | LOC105379364 | XLOC_119876 | 290 coding   | noncoding | noncoding | noncoding |
| MSTRG. 112993. 1  | LOC105379364 | XLOC_119882 | 259 coding   | noncoding | noncoding | noncoding |
| MSTRG. 113002. 1  |              | XLOC_119891 | 305 coding   | noncoding | noncoding | noncoding |
| MSTRG. 113139. 1  | UNC5D        | XLOC_119911 | 274 coding   | noncoding | noncoding | noncoding |
| MSTRG. 113145. 1  | UNC5D        | XLOC_119915 | 233 coding   | noncoding | noncoding | noncoding |
| NR_125819. 1      | LOC101929550 | XLOC_119919 | 5391 coding  | noncoding | coding    | noncoding |
| MSTRG. 113158. 1  | UNC5D        | XLOC_119920 | 223 coding   | noncoding | noncoding | noncoding |
| MSTRG. 113116. 1  |              | XLOC_119926 | 314 coding   | noncoding | noncoding | noncoding |
| MSTRG. 113167. 1  |              | XLOC_119934 | 226 coding   | coding    | noncoding | noncoding |
| MSTRG. 113168. 1  |              | XLOC_119939 | 288 coding   | noncoding | noncoding | noncoding |
| MSTRG. 113194. 1  | KCNU1        | XLOC_119943 | 478 coding   | noncoding | noncoding | noncoding |
| MSTRG. 113195. 1  | KCNU1        | XLOC_119944 | 202 coding   | noncoding | noncoding | noncoding |
| MSTRG. 113176. 1  |              | XLOC_119949 | 253 coding   | noncoding | noncoding | noncoding |
| MSTRG. 113222. 1  |              | XLOC_119964 | 266 coding   | noncoding | noncoding | noncoding |
| MSTRG. 113236. 1  | LINC01605    | XLOC_119972 | 287 coding   | noncoding | noncoding | noncoding |
| MSTRG. 113282. 1  |              | XLOC_119991 | 235 coding   | noncoding | noncoding | noncoding |
| MSTRG. 113267. 1  | GOT1L1       | XLOC_119999 | 219 coding   | noncoding | noncoding | noncoding |
| MSTRG. 113270. 1  |              | XLOC_120003 | 287 coding   | noncoding | noncoding | noncoding |
| MSTRG. 113272. 1  |              | XLOC_120004 | 241 coding   | noncoding | noncoding | noncoding |
| MSTRG. 113274. 1  |              | XLOC_120005 | 247 coding   | noncoding | noncoding | noncoding |
| MSTRG. 113296. 1  |              | XLOC_120009 | 255 coding   | noncoding | noncoding | noncoding |

|                   |              |             |             |           |           |           |
|-------------------|--------------|-------------|-------------|-----------|-----------|-----------|
| MSTRG. 113306. 1  | LOC105379382 | XLOC_120014 | 251 coding  | noncoding | noncoding | noncoding |
| MSTRG. 113310. 1  |              | XLOC_120019 | 375 coding  | noncoding | noncoding | noncoding |
| XM_011544674. 2   | PLPP5        | XLOC_120021 | 1111 coding | noncoding | coding    | coding    |
| MSTRG. 113340. 1  | NSD3         | XLOC_120035 | 228 coding  | noncoding | noncoding | noncoding |
| MSTRG. 113344. 3  | LETM2        | XLOC_120038 | 454 coding  | noncoding | noncoding | noncoding |
| MSTRG. 113349. 1  | FGFR1        | XLOC_120042 | 301 coding  | noncoding | noncoding | noncoding |
| MSTRG. 113483. 5  | TACC1        | XLOC_120052 | 2215 coding | noncoding | coding    | coding    |
| MSTRG. 113378. 1  |              | XLOC_120071 | 321 coding  | noncoding | noncoding | noncoding |
| MSTRG. 113398. 1  | LOC105379385 | XLOC_120075 | 257 coding  | noncoding | noncoding | noncoding |
| MSTRG. 113405. 1  |              | XLOC_120083 | 271 coding  | noncoding | noncoding | noncoding |
| MSTRG. 113450. 1  | ZMAT4        | XLOC_120088 | 313 coding  | noncoding | noncoding | noncoding |
| MSTRG. 113464. 1  | ZMAT4        | XLOC_120092 | 278 coding  | noncoding | noncoding | noncoding |
| MSTRG. 113416. 1  |              | XLOC_120101 | 323 coding  | noncoding | noncoding | noncoding |
| MSTRG. 113433. 1  |              | XLOC_120113 | 285 coding  | coding    | noncoding | noncoding |
| MSTRG. 113434. 1  |              | XLOC_120114 | 242 coding  | noncoding | noncoding | noncoding |
| XM_005273476. 4   | ANK1         | XLOC_120123 | 8590 coding | coding    | coding    | coding    |
| MSTRG. 113543. 39 | LOC105379392 | XLOC_120123 | 1550 coding | noncoding | noncoding | noncoding |
| MSTRG. 113560. 1  |              | XLOC_120154 | 257 coding  | noncoding | noncoding | noncoding |
| MSTRG. 113568. 1  |              | XLOC_120155 | 236 coding  | noncoding | noncoding | noncoding |
| MSTRG. 113597. 1  |              | XLOC_120168 | 274 coding  | noncoding | noncoding | noncoding |
| MSTRG. 113606. 1  | CHRNA3       | XLOC_120171 | 323 coding  | noncoding | noncoding | noncoding |
| MSTRG. 113601. 1  | CHRNA6       | XLOC_120173 | 252 coding  | noncoding | noncoding | noncoding |
| MSTRG. 113599. 1  |              | XLOC_120174 | 230 coding  | noncoding | noncoding | noncoding |
| MSTRG. 113609. 1  |              | XLOC_120177 | 270 coding  | noncoding | noncoding | noncoding |
| MSTRG. 113611. 1  |              | XLOC_120179 | 287 coding  | noncoding | noncoding | noncoding |
| NM_199003. 1      | THAP1        | XLOC_120180 | 1971 coding | noncoding | coding    | noncoding |
| MSTRG. 113691. 1  |              | XLOC_120202 | 214 coding  | coding    | noncoding | noncoding |
| MSTRG. 113740. 1  | ASNSP1       | XLOC_120221 | 296 coding  | coding    | coding    | noncoding |
| MSTRG. 113754. 1  | LOC105375815 | XLOC_120226 | 261 coding  | noncoding | noncoding | noncoding |
| MSTRG. 113759. 1  |              | XLOC_120235 | 296 coding  | noncoding | noncoding | noncoding |
| MSTRG. 113760. 1  |              | XLOC_120236 | 278 coding  | noncoding | noncoding | noncoding |
| MSTRG. 113959. 4  | SPIDR        | XLOC_120238 | 2859 coding | coding    | noncoding | noncoding |
| MSTRG. 113782. 2  | UBE2V2       | XLOC_120257 | 1193 coding | coding    | noncoding | noncoding |
| MSTRG. 113766. 1  |              | XLOC_120259 | 240 coding  | noncoding | noncoding | noncoding |
| MSTRG. 113801. 1  | LOC105375821 | XLOC_120269 | 283 coding  | noncoding | noncoding | noncoding |
| MSTRG. 113821. 1  | LOC105375825 | XLOC_120279 | 249 coding  | noncoding | noncoding | noncoding |
| MSTRG. 113837. 1  |              | XLOC_120285 | 228 coding  | noncoding | noncoding | noncoding |
| MSTRG. 113847. 1  |              | XLOC_120291 | 290 coding  | noncoding | noncoding | noncoding |
| MSTRG. 113875. 1  |              | XLOC_120299 | 393 coding  | coding    | noncoding | noncoding |
| MSTRG. 113866. 1  |              | XLOC_120300 | 302 coding  | noncoding | noncoding | noncoding |
| MSTRG. 113890. 1  |              | XLOC_120307 | 232 coding  | noncoding | noncoding | noncoding |
| MSTRG. 113896. 1  |              | XLOC_120310 | 257 coding  | noncoding | noncoding | noncoding |
| MSTRG. 113926. 1  | SNTG1        | XLOC_120312 | 369 coding  | noncoding | noncoding | noncoding |

|                  |              |             |             |           |           |           |
|------------------|--------------|-------------|-------------|-----------|-----------|-----------|
| MSTRG. 113934. 1 | SNTG1        | XLOC_120318 | 210 coding  | noncoding | noncoding | noncoding |
| MSTRG. 113937. 1 | SNTG1        | XLOC_120319 | 435 coding  | coding    | noncoding | noncoding |
| MSTRG. 113948. 1 | SNTG1        | XLOC_120327 | 286 coding  | noncoding | noncoding | noncoding |
| MSTRG. 113921. 1 |              | XLOC_120344 | 231 coding  | noncoding | noncoding | noncoding |
| MSTRG. 114002. 1 | PCMTD1       | XLOC_120358 | 701 coding  | coding    | noncoding | coding    |
| MSTRG. 114002. 7 | PCMTD1       | XLOC_120358 | 862 coding  | coding    | noncoding | coding    |
| MSTRG. 113965. 1 |              | XLOC_120377 | 451 coding  | noncoding | noncoding | noncoding |
| MSTRG. 114092. 1 |              | XLOC_120399 | 777 coding  | noncoding | noncoding | noncoding |
| MSTRG. 114053. 1 |              | XLOC_120410 | 271 coding  | noncoding | noncoding | noncoding |
| MSTRG. 114056. 1 |              | XLOC_120413 | 248 coding  | noncoding | noncoding | noncoding |
| NR_149032. 1     | LOC100507516 | XLOC_120415 | 5813 coding | noncoding | noncoding | noncoding |
| MSTRG. 114066. 1 |              | XLOC_120416 | 271 coding  | coding    | noncoding | noncoding |
| MSTRG. 114106. 1 | TCEA1        | XLOC_120446 | 271 coding  | noncoding | noncoding | noncoding |
| MSTRG. 114137. 1 | RP1          | XLOC_120462 | 242 coding  | noncoding | noncoding | noncoding |
| MSTRG. 114129. 1 |              | XLOC_120464 | 415 coding  | noncoding | noncoding | noncoding |
| MSTRG. 114197. 1 | XKR4         | XLOC_120474 | 299 coding  | noncoding | noncoding | noncoding |
| MSTRG. 114368. 1 |              | XLOC_120486 | 252 coding  | noncoding | noncoding | noncoding |
| MSTRG. 114231. 1 |              | XLOC_120507 | 332 coding  | noncoding | noncoding | noncoding |
| NM_001318049. 1  | SDR16C5      | XLOC_120509 | 3641 coding | coding    | coding    | coding    |
| MSTRG. 114233. 1 |              | XLOC_120512 | 269 coding  | coding    | noncoding | noncoding |
| MSTRG. 114236. 1 |              | XLOC_120513 | 285 coding  | noncoding | noncoding | noncoding |
| MSTRG. 114263. 1 | LOC101929415 | XLOC_120521 | 273 coding  | noncoding | noncoding | noncoding |
| MSTRG. 114258. 1 |              | XLOC_120532 | 419 coding  | coding    | noncoding | noncoding |
| MSTRG. 114278. 1 |              | XLOC_120535 | 288 coding  | noncoding | noncoding | noncoding |
| NM_017813. 5     | IMPAD1       | XLOC_120539 | 7224 coding | coding    | coding    | coding    |
| MSTRG. 114290. 1 | LOC107986888 | XLOC_120544 | 201 coding  | noncoding | noncoding | noncoding |
| MSTRG. 114301. 1 |              | XLOC_120549 | 247 coding  | noncoding | noncoding | noncoding |
| MSTRG. 114321. 1 |              | XLOC_120557 | 306 coding  | noncoding | noncoding | noncoding |
| MSTRG. 114328. 1 | LOC105375856 | XLOC_120560 | 277 coding  | noncoding | noncoding | noncoding |
| MSTRG. 114329. 1 | LOC105375856 | XLOC_120561 | 288 coding  | noncoding | noncoding | noncoding |
| MSTRG. 114402. 1 |              | XLOC_120590 | 225 coding  | noncoding | noncoding | noncoding |
| MSTRG. 114439. 1 |              | XLOC_120642 | 293 coding  | noncoding | noncoding | noncoding |
| MSTRG. 114461. 1 |              | XLOC_120654 | 264 coding  | noncoding | noncoding | noncoding |
| MSTRG. 114484. 1 | LOC105375864 | XLOC_120666 | 244 coding  | noncoding | noncoding | noncoding |
| MSTRG. 114485. 1 |              | XLOC_120670 | 305 coding  | noncoding | noncoding | noncoding |
| MSTRG. 115597. 1 | CLVS1        | XLOC_120735 | 262 coding  | noncoding | noncoding | noncoding |
| MSTRG. 115599. 1 | CLVS1        | XLOC_120737 | 282 coding  | noncoding | noncoding | noncoding |
| MSTRG. 115641. 1 | ASPH         | XLOC_120778 | 268 coding  | noncoding | noncoding | noncoding |
| MSTRG. 114580. 1 |              | XLOC_120791 | 260 coding  | noncoding | noncoding | noncoding |
| MSTRG. 114631. 1 | NKAIN3       | XLOC_120803 | 268 coding  | noncoding | noncoding | noncoding |
| MSTRG. 114636. 1 | NKAIN3       | XLOC_120805 | 278 coding  | noncoding | noncoding | noncoding |
| MSTRG. 114638. 1 | NKAIN3       | XLOC_120807 | 276 coding  | noncoding | noncoding | noncoding |
| MSTRG. 114589. 1 | TTPA         | XLOC_120813 | 253 coding  | noncoding | noncoding | noncoding |

|                  |              |             |             |           |           |           |
|------------------|--------------|-------------|-------------|-----------|-----------|-----------|
| MSTRG. 114643. 1 |              | XLOC_120822 | 246 coding  | noncoding | noncoding | noncoding |
| MSTRG. 114657. 1 |              | XLOC_120830 | 339 coding  | noncoding | noncoding | noncoding |
| MSTRG. 114659. 1 |              | XLOC_120832 | 259 coding  | noncoding | noncoding | noncoding |
| MSTRG. 114661. 1 |              | XLOC_120833 | 250 coding  | coding    | noncoding | noncoding |
| MSTRG. 114701. 1 | LINC01414    | XLOC_120843 | 375 coding  | noncoding | noncoding | noncoding |
| MSTRG. 114704. 1 | LINC01414    | XLOC_120844 | 277 coding  | noncoding | noncoding | noncoding |
| MSTRG. 114708. 1 | LINC01414    | XLOC_120846 | 272 coding  | noncoding | noncoding | noncoding |
| MSTRG. 114693. 1 |              | XLOC_120850 | 224 coding  | noncoding | noncoding | noncoding |
| MSTRG. 114732. 1 |              | XLOC_120865 | 258 coding  | noncoding | noncoding | noncoding |
| MSTRG. 114739. 1 |              | XLOC_120869 | 261 coding  | noncoding | noncoding | noncoding |
| MSTRG. 114744. 1 |              | XLOC_120872 | 600 coding  | noncoding | noncoding | noncoding |
| MSTRG. 114804. 1 |              | XLOC_120889 | 219 coding  | noncoding | noncoding | noncoding |
| MSTRG. 114820. 1 | DNAJC5B      | XLOC_120894 | 253 coding  | noncoding | noncoding | noncoding |
| MSTRG. 114858. 1 | LOC102724687 | XLOC_120905 | 360 coding  | noncoding | noncoding | noncoding |
| MSTRG. 114882. 1 | VXN          | XLOC_120912 | 248 coding  | noncoding | noncoding | noncoding |
| MSTRG. 114945. 1 | MCMD2        | XLOC_120937 | 482 coding  | noncoding | noncoding | noncoding |
| MSTRG. 114899. 1 | PPP1R42      | XLOC_120944 | 258 coding  | noncoding | noncoding | noncoding |
| MSTRG. 115101. 1 | LOC102724708 | XLOC_120972 | 360 coding  | noncoding | noncoding | noncoding |
| MSTRG. 114906. 1 |              | XLOC_120981 | 248 coding  | noncoding | noncoding | noncoding |
| MSTRG. 114987. 1 | LINC01603    | XLOC_121009 | 548 coding  | noncoding | noncoding | coding    |
| MSTRG. 114995. 1 | SULF1        | XLOC_121012 | 271 coding  | noncoding | noncoding | noncoding |
| MSTRG. 115000. 1 | SULF1        | XLOC_121015 | 226 coding  | noncoding | noncoding | noncoding |
| XM_017013883. 1  | SLCO5A1      | XLOC_121016 | 9012 coding | coding    | coding    | coding    |
| MSTRG. 115014. 1 |              | XLOC_121019 | 346 coding  | noncoding | noncoding | noncoding |
| MSTRG. 115016. 1 |              | XLOC_121021 | 269 coding  | noncoding | noncoding | noncoding |
| MSTRG. 115018. 1 |              | XLOC_121022 | 246 coding  | noncoding | noncoding | noncoding |
| XM_017013267. 2  | TRAM1        | XLOC_121117 | 2908 coding | coding    | noncoding | coding    |
| MSTRG. 115165. 1 | XKR9         | XLOC_121145 | 320 coding  | noncoding | noncoding | noncoding |
| MSTRG. 115059. 1 |              | XLOC_121147 | 216 coding  | noncoding | noncoding | noncoding |
| MSTRG. 115134. 1 | EYA1         | XLOC_121157 | 311 coding  | noncoding | noncoding | noncoding |
| MSTRG. 115136. 1 | EYA1         | XLOC_121159 | 255 coding  | noncoding | noncoding | noncoding |
| MSTRG. 115063. 1 |              | XLOC_121161 | 270 coding  | noncoding | noncoding | noncoding |
| MSTRG. 115070. 1 |              | XLOC_121166 | 226 coding  | noncoding | noncoding | noncoding |
| MSTRG. 115072. 1 |              | XLOC_121167 | 351 coding  | noncoding | noncoding | noncoding |
| MSTRG. 115194. 1 | LOC392232    | XLOC_121218 | 302 coding  | noncoding | noncoding | noncoding |
| MSTRG. 115214. 1 | KCNB2        | XLOC_121227 | 298 coding  | noncoding | noncoding | noncoding |
| MSTRG. 115251. 1 | C8orf89      | XLOC_121242 | 233 coding  | noncoding | noncoding | noncoding |
| NR_073121. 2     | UBE2W        | XLOC_121274 | 8275 coding | coding    | noncoding | noncoding |
| MSTRG. 115697. 1 |              | XLOC_121365 | 308 coding  | noncoding | noncoding | noncoding |
| MSTRG. 115691. 1 | MIR2052HG    | XLOC_121371 | 310 coding  | noncoding | noncoding | noncoding |
| MSTRG. 115720. 1 |              | XLOC_121385 | 253 coding  | noncoding | noncoding | noncoding |
| MSTRG. 115723. 1 | CASC9        | XLOC_121387 | 343 coding  | coding    | noncoding | noncoding |
| MSTRG. 115738. 1 |              | XLOC_121393 | 853 coding  | noncoding | noncoding | noncoding |

|                  |              |             |              |           |           |           |
|------------------|--------------|-------------|--------------|-----------|-----------|-----------|
| MSTRG. 115744. 1 |              | XLOC_121396 | 307 coding   | noncoding | noncoding | noncoding |
| MSTRG. 115756. 1 | LOC102724858 | XLOC_121402 | 394 coding   | noncoding | noncoding | noncoding |
| MSTRG. 115798. 1 |              | XLOC_121425 | 234 coding   | noncoding | noncoding | noncoding |
| MSTRG. 115801. 1 |              | XLOC_121426 | 292 coding   | noncoding | noncoding | noncoding |
| MSTRG. 115823. 1 |              | XLOC_121434 | 290 coding   | noncoding | noncoding | noncoding |
| MSTRG. 115828. 1 |              | XLOC_121436 | 304 coding   | coding    | noncoding | noncoding |
| MSTRG. 115829. 1 |              | XLOC_121438 | 208 coding   | noncoding | noncoding | noncoding |
| MSTRG. 115837. 1 |              | XLOC_121442 | 293 coding   | noncoding | noncoding | noncoding |
| MSTRG. 116054. 1 | LOC105375911 | XLOC_121459 | 259 coding   | noncoding | noncoding | noncoding |
| MSTRG. 115863. 1 |              | XLOC_121513 | 340 coding   | noncoding | noncoding | noncoding |
| MSTRG. 115865. 1 |              | XLOC_121514 | 319 coding   | noncoding | noncoding | noncoding |
| MSTRG. 115873. 1 |              | XLOC_121518 | 512 coding   | noncoding | noncoding | noncoding |
| MSTRG. 115899. 1 | LOC101927040 | XLOC_121530 | 268 coding   | noncoding | noncoding | noncoding |
| MSTRG. 115995. 1 | MRPS28       | XLOC_121542 | 315 coding   | noncoding | noncoding | noncoding |
| MSTRG. 115906. 1 |              | XLOC_121554 | 266 coding   | noncoding | noncoding | noncoding |
| MSTRG. 115911. 1 |              | XLOC_121558 | 300 coding   | noncoding | noncoding | noncoding |
| MSTRG. 115920. 1 |              | XLOC_121566 | 682 coding   | noncoding | noncoding | noncoding |
| MSTRG. 115947. 1 | ZNF704       | XLOC_121574 | 308 coding   | noncoding | noncoding | noncoding |
| MSTRG. 116174. 1 |              | XLOC_121648 | 290 coding   | noncoding | noncoding | noncoding |
| MSTRG. 116230. 1 | IMPA1        | XLOC_121655 | 283 coding   | noncoding | noncoding | noncoding |
| MSTRG. 116218. 1 |              | XLOC_121664 | 217 coding   | noncoding | noncoding | noncoding |
| MSTRG. 116247. 1 |              | XLOC_121672 | 410 coding   | noncoding | noncoding | noncoding |
| MSTRG. 116270. 1 |              | XLOC_121684 | 279 coding   | noncoding | noncoding | noncoding |
| MSTRG. 116318. 1 |              | XLOC_121701 | 238 coding   | coding    | noncoding | noncoding |
| MSTRG. 116331. 1 |              | XLOC_121706 | 323 coding   | noncoding | noncoding | noncoding |
| MSTRG. 116332. 1 |              | XLOC_121707 | 217 coding   | noncoding | noncoding | noncoding |
| MSTRG. 116340. 1 |              | XLOC_121712 | 271 coding   | noncoding | noncoding | noncoding |
| MSTRG. 116353. 1 | RALYL        | XLOC_121714 | 271 coding   | noncoding | noncoding | noncoding |
| MSTRG. 116381. 1 | RALYL        | XLOC_121728 | 273 coding   | noncoding | noncoding | noncoding |
| MSTRG. 116350. 1 |              | XLOC_121735 | 301 coding   | noncoding | noncoding | noncoding |
| NM_001738. 5     | CA1          | XLOC_121757 | 1884 coding  | coding    | coding    | coding    |
| MSTRG. 116431. 1 |              | XLOC_121776 | 217 coding   | noncoding | noncoding | noncoding |
| XM_005251122. 3  | LOC101929627 | XLOC_121779 | 2028 coding  | coding    | coding    | coding    |
| NR_003594. 1     | REXO1L2P     | XLOC_121780 | 1078 coding  | coding    | coding    | coding    |
| XM_002342862. 6  | LOC100288562 | XLOC_121781 | 2028 coding  | coding    | coding    | coding    |
| MSTRG. 116449. 1 |              | XLOC_121782 | 1473 coding  | noncoding | coding    | coding    |
| MSTRG. 116465. 1 | ATP6V0D2     | XLOC_121789 | 229 coding   | noncoding | noncoding | noncoding |
| MSTRG. 116463. 1 |              | XLOC_121791 | 279 coding   | noncoding | noncoding | noncoding |
| MSTRG. 116474. 1 |              | XLOC_121795 | 329 coding   | noncoding | noncoding | noncoding |
| MSTRG. 116483. 1 | CNGB3        | XLOC_121805 | 430 coding   | noncoding | noncoding | noncoding |
| MSTRG. 116502. 1 | CNBD1        | XLOC_121813 | 320 coding   | noncoding | noncoding | noncoding |
| XM_024447154. 1  | MMP16        | XLOC_121820 | 19061 coding | coding    | coding    | coding    |
| MSTRG. 116523. 1 | MMP16        | XLOC_121823 | 236 coding   | noncoding | noncoding | noncoding |

|                  |              |             |              |           |           |           |
|------------------|--------------|-------------|--------------|-----------|-----------|-----------|
| MSTRG. 116554. 1 | LOC105375630 | XLOC_121832 | 297 coding   | noncoding | noncoding | noncoding |
| MSTRG. 116568. 1 | LOC105375631 | XLOC_121839 | 224 coding   | noncoding | noncoding | noncoding |
| MSTRG. 116577. 1 | LOC105375631 | XLOC_121846 | 234 coding   | noncoding | noncoding | noncoding |
| MSTRG. 116538. 1 |              | XLOC_121859 | 261 coding   | noncoding | noncoding | noncoding |
| MSTRG. 116651. 7 | DECRI        | XLOC_121867 | 2554 coding  | coding    | coding    | noncoding |
| NM_001363275. 1  | C8orf88      | XLOC_121902 | 1002 coding  | noncoding | noncoding | noncoding |
| MSTRG. 116717. 1 |              | XLOC_121943 | 314 coding   | noncoding | noncoding | noncoding |
| MSTRG. 116721. 1 |              | XLOC_121945 | 241 coding   | noncoding | noncoding | noncoding |
| MSTRG. 116733. 1 |              | XLOC_121955 | 340 coding   | noncoding | coding    | noncoding |
| MSTRG. 116738. 1 |              | XLOC_121956 | 220 coding   | noncoding | noncoding | noncoding |
| MSTRG. 116740. 1 |              | XLOC_121958 | 289 coding   | noncoding | noncoding | noncoding |
| MSTRG. 116922. 1 | LOC107986956 | XLOC_121984 | 305 coding   | noncoding | noncoding | noncoding |
| MSTRG. 116968. 1 | TMEM67       | XLOC_122007 | 247 coding   | noncoding | noncoding | noncoding |
| MSTRG. 116972. 1 |              | XLOC_122009 | 238 coding   | noncoding | noncoding | noncoding |
| MSTRG. 116984. 1 |              | XLOC_122021 | 299 coding   | noncoding | noncoding | noncoding |
| MSTRG. 116992. 1 |              | XLOC_122034 | 339 coding   | noncoding | noncoding | noncoding |
| NM_183009. 2     | VIRMA        | XLOC_122044 | 3668 coding  | coding    | coding    | coding    |
| MSTRG. 117047. 1 | ESRP1        | XLOC_122054 | 297 coding   | noncoding | noncoding | noncoding |
| MSTRG. 117048. 1 | ESRP1        | XLOC_122055 | 263 coding   | noncoding | noncoding | noncoding |
| MSTRG. 117049. 1 |              | XLOC_122061 | 299 coding   | noncoding | noncoding | noncoding |
| MSTRG. 117131. 1 | NDUFAF6      | XLOC_122079 | 284 coding   | noncoding | noncoding | noncoding |
| MSTRG. 117086. 1 |              | XLOC_122100 | 396 coding   | noncoding | noncoding | noncoding |
| MSTRG. 117205. 1 | C8orf37-AS1  | XLOC_122139 | 263 coding   | noncoding | coding    | noncoding |
| MSTRG. 117210. 1 | C8orf37-AS1  | XLOC_122142 | 236 coding   | noncoding | noncoding | noncoding |
| NR_045639. 1     | UQCRB        | XLOC_122163 | 5109 coding  | coding    | coding    | noncoding |
| MSTRG. 117236. 1 |              | XLOC_122170 | 1244 coding  | noncoding | noncoding | noncoding |
| MSTRG. 117256. 1 |              | XLOC_122207 | 309 coding   | noncoding | noncoding | noncoding |
| MSTRG. 117265. 1 |              | XLOC_122211 | 279 coding   | noncoding | noncoding | noncoding |
| MSTRG. 117266. 1 |              | XLOC_122213 | 224 coding   | noncoding | noncoding | noncoding |
| MSTRG. 117290. 1 | MATN2        | XLOC_122216 | 277 coding   | noncoding | noncoding | noncoding |
| MSTRG. 117278. 1 |              | XLOC_122223 | 244 coding   | noncoding | noncoding | noncoding |
| MSTRG. 117279. 1 |              | XLOC_122224 | 303 coding   | noncoding | noncoding | noncoding |
| MSTRG. 117282. 1 | ERICH5       | XLOC_122226 | 461 coding   | noncoding | noncoding | noncoding |
| XM_017013756. 1  | STK3         | XLOC_122244 | 3705 coding  | coding    | coding    | coding    |
| XR_001745585. 1  | STK3         | XLOC_122244 | 2779 coding  | coding    | coding    | coding    |
| MSTRG. 117525. 1 | STK3         | XLOC_122269 | 248 coding   | noncoding | noncoding | noncoding |
| MSTRG. 117329. 1 |              | XLOC_122279 | 213 coding   | noncoding | noncoding | noncoding |
| MSTRG. 117579. 1 | VPS13B-DT    | XLOC_122280 | 14413 coding | coding    | noncoding | coding    |
| MSTRG. 117330. 1 |              | XLOC_122297 | 263 coding   | noncoding | noncoding | noncoding |
| MSTRG. 117345. 1 | RGS22        | XLOC_122301 | 281 coding   | coding    | noncoding | noncoding |
| MSTRG. 117347. 1 | RGS22        | XLOC_122302 | 225 coding   | noncoding | noncoding | noncoding |
| MSTRG. 117334. 1 |              | XLOC_122303 | 276 coding   | coding    | noncoding | noncoding |
| MSTRG. 117350. 1 |              | XLOC_122318 | 237 coding   | noncoding | noncoding | noncoding |

|                  |              |             |             |           |           |           |
|------------------|--------------|-------------|-------------|-----------|-----------|-----------|
| MSTRG. 117356. 1 | LOC105375670 | XLOC_122320 | 268 coding  | noncoding | noncoding | noncoding |
| MSTRG. 117399. 1 | SNX31        | XLOC_122331 | 303 coding  | noncoding | noncoding | noncoding |
| MSTRG. 117404. 1 | SNX31        | XLOC_122333 | 431 coding  | noncoding | noncoding | noncoding |
| MSTRG. 117362. 1 |              | XLOC_122334 | 317 coding  | noncoding | noncoding | noncoding |
| MSTRG. 117431. 1 |              | XLOC_122361 | 217 coding  | noncoding | noncoding | noncoding |
| NM_001042510. 1  | ZNF706       | XLOC_122374 | 2860 coding | coding    | noncoding | noncoding |
| XM_024447304. 1  | NCALD        | XLOC_122391 | 4763 coding | coding    | coding    | coding    |
| MSTRG. 117552. 1 |              | XLOC_122463 | 285 coding  | noncoding | noncoding | noncoding |
| MSTRG. 117553. 1 |              | XLOC_122464 | 250 coding  | noncoding | noncoding | noncoding |
| NM_005655. 4     | KLF10        | XLOC_122471 | 2915 coding | coding    | coding    | coding    |
| MSTRG. 117865. 1 |              | XLOC_122529 | 271 coding  | noncoding | noncoding | noncoding |
| MSTRG. 117728. 1 |              | XLOC_122538 | 214 coding  | noncoding | noncoding | noncoding |
| NR_145697. 1     | LOC105375690 | XLOC_122540 | 3068 coding | noncoding | coding    | noncoding |
| MSTRG. 117924. 1 | RIMS2        | XLOC_122545 | 217 coding  | noncoding | noncoding | noncoding |
| MSTRG. 117931. 1 | RIMS2        | XLOC_122549 | 299 coding  | noncoding | noncoding | noncoding |
| MSTRG. 117883. 1 |              | XLOC_122562 | 207 coding  | noncoding | noncoding | noncoding |
| MSTRG. 117899. 1 |              | XLOC_122575 | 224 coding  | noncoding | noncoding | noncoding |
| MSTRG. 117974. 1 |              | XLOC_122611 | 857 coding  | noncoding | noncoding | noncoding |
| MSTRG. 118005. 1 |              | XLOC_122655 | 271 coding  | noncoding | noncoding | noncoding |
| MSTRG. 118017. 1 |              | XLOC_122660 | 262 coding  | coding    | noncoding | noncoding |
| MSTRG. 118021. 1 |              | XLOC_122663 | 267 coding  | noncoding | noncoding | noncoding |
| MSTRG. 118025. 1 |              | XLOC_122672 | 436 coding  | noncoding | noncoding | noncoding |
| MSTRG. 118029. 1 |              | XLOC_122674 | 303 coding  | noncoding | noncoding | noncoding |
| MSTRG. 118053. 1 |              | XLOC_122692 | 294 coding  | noncoding | noncoding | noncoding |
| MSTRG. 118067. 1 | RSPO2        | XLOC_122695 | 279 coding  | noncoding | noncoding | noncoding |
| MSTRG. 118059. 1 |              | XLOC_122698 | 284 coding  | coding    | noncoding | noncoding |
| MSTRG. 118187. 1 | LOC105375704 | XLOC_122711 | 247 coding  | noncoding | noncoding | noncoding |
| MSTRG. 118212. 1 | TMEM74       | XLOC_122733 | 213 coding  | coding    | noncoding | noncoding |
| MSTRG. 118262. 1 | NUDCD1       | XLOC_122753 | 391 coding  | noncoding | noncoding | noncoding |
| MSTRG. 118274. 1 |              | XLOC_122780 | 236 coding  | noncoding | noncoding | noncoding |
| MSTRG. 118325. 1 |              | XLOC_122794 | 296 coding  | noncoding | noncoding | noncoding |
| MSTRG. 118329. 1 |              | XLOC_122795 | 289 coding  | noncoding | noncoding | noncoding |
| MSTRG. 118376. 1 |              | XLOC_122821 | 275 coding  | noncoding | noncoding | noncoding |
| MSTRG. 118432. 1 | CSMD3        | XLOC_122839 | 256 coding  | coding    | noncoding | noncoding |
| MSTRG. 118440. 1 | CSMD3        | XLOC_122843 | 317 coding  | noncoding | noncoding | noncoding |
| MSTRG. 118402. 1 |              | XLOC_122856 | 314 coding  | noncoding | noncoding | noncoding |
| MSTRG. 118660. 1 | TRPS1        | XLOC_122902 | 302 coding  | noncoding | noncoding | noncoding |
| MSTRG. 118536. 1 |              | XLOC_122956 | 236 coding  | noncoding | noncoding | noncoding |
| MSTRG. 118580. 1 |              | XLOC_123007 | 214 coding  | noncoding | noncoding | noncoding |
| MSTRG. 118603. 1 |              | XLOC_123018 | 218 coding  | noncoding | noncoding | noncoding |
| MSTRG. 118702. 1 |              | XLOC_123059 | 203 coding  | noncoding | noncoding | noncoding |
| MSTRG. 118739. 1 |              | XLOC_123127 | 238 coding  | noncoding | noncoding | noncoding |
| MSTRG. 118741. 1 |              | XLOC_123129 | 255 coding  | noncoding | noncoding | noncoding |

|                   |              |             |              |           |           |           |
|-------------------|--------------|-------------|--------------|-----------|-----------|-----------|
| MSTRG. 118747. 1  |              | XLOC_123132 | 207 coding   | noncoding | noncoding | noncoding |
| MSTRG. 118769. 1  | DEPTOR       | XLOC_123146 | 263 coding   | noncoding | noncoding | noncoding |
| MSTRG. 118776. 1  | COL14A1      | XLOC_123151 | 306 coding   | noncoding | noncoding | noncoding |
| MSTRG. 118773. 1  |              | XLOC_123153 | 304 coding   | noncoding | noncoding | noncoding |
| MSTRG. 119125. 1  | SNTB1        | XLOC_123172 | 242 coding   | noncoding | noncoding | noncoding |
| MSTRG. 118875. 1  |              | XLOC_123203 | 648 coding   | coding    | noncoding | noncoding |
| MSTRG. 118915. 1  |              | XLOC_123226 | 221 coding   | noncoding | noncoding | noncoding |
| MSTRG. 118920. 1  |              | XLOC_123229 | 284 coding   | noncoding | noncoding | noncoding |
| MSTRG. 118921. 1  |              | XLOC_123230 | 289 coding   | noncoding | noncoding | noncoding |
| MSTRG. 118935. 1  |              | XLOC_123237 | 237 coding   | noncoding | noncoding | noncoding |
| MSTRG. 118944. 1  |              | XLOC_123243 | 314 coding   | noncoding | noncoding | noncoding |
| MSTRG. 118945. 1  |              | XLOC_123244 | 292 coding   | noncoding | noncoding | noncoding |
| MSTRG. 118957. 1  |              | XLOC_123262 | 276 coding   | noncoding | noncoding | noncoding |
| MSTRG. 118963. 1  | LOC107986904 | XLOC_123266 | 315 coding   | noncoding | noncoding | noncoding |
| MSTRG. 119156. 1  |              | XLOC_123271 | 307 coding   | noncoding | noncoding | noncoding |
| MSTRG. 119191. 1  | WDYHV1       | XLOC_123291 | 1080 coding  | noncoding | noncoding | noncoding |
| MSTRG. 119196. 1  |              | XLOC_123304 | 278 coding   | noncoding | noncoding | noncoding |
| MSTRG. 119206. 1  |              | XLOC_123305 | 238 coding   | noncoding | noncoding | noncoding |
| MSTRG. 119252. 1  | FER1L6       | XLOC_123320 | 288 coding   | noncoding | noncoding | noncoding |
| NM_001363295. 1   | MTSS1        | XLOC_123353 | 4957 coding  | coding    | coding    | coding    |
| MSTRG. 119393. 1  | MTSS1        | XLOC_123357 | 285 coding   | noncoding | noncoding | noncoding |
| XM_017014113. 2   | WASHC5       | XLOC_123384 | 4366 coding  | coding    | coding    | coding    |
| MSTRG. 119451. 1  | LOC105375746 | XLOC_123391 | 231 coding   | noncoding | noncoding | noncoding |
| MSTRG. 119461. 1  | LOC105375746 | XLOC_123396 | 270 coding   | noncoding | noncoding | noncoding |
| MSTRG. 119480. 1  |              | XLOC_123409 | 267 coding   | noncoding | noncoding | noncoding |
| MSTRG. 119527. 1  |              | XLOC_123702 | 311 coding   | noncoding | noncoding | noncoding |
| MSTRG. 119533. 1  |              | XLOC_123709 | 284 coding   | noncoding | noncoding | noncoding |
| MSTRG. 119562. 1  |              | XLOC_123723 | 423 coding   | noncoding | noncoding | noncoding |
| MSTRG. 119592. 1  |              | XLOC_123729 | 272 coding   | noncoding | noncoding | noncoding |
| NR_130917. 1      | CCDC26       | XLOC_123731 | 1718 coding  | noncoding | noncoding | noncoding |
| MSTRG. 119597. 1  | CCDC26       | XLOC_123732 | 241 coding   | noncoding | noncoding | noncoding |
| NM_016623. 5      | FAM49B       | XLOC_123741 | 3777 coding  | coding    | coding    | coding    |
| NM_001353248. 2   | FAM49B       | XLOC_123741 | 3900 coding  | coding    | coding    | coding    |
| MSTRG. 119651. 1  |              | XLOC_123824 | 303 coding   | noncoding | noncoding | noncoding |
| MSTRG. 119654. 1  |              | XLOC_123827 | 348 coding   | noncoding | noncoding | noncoding |
| MSTRG. 119669. 1  |              | XLOC_123833 | 276 coding   | noncoding | noncoding | noncoding |
| MSTRG. 119691. 1  | LOC105375760 | XLOC_123839 | 328 coding   | noncoding | noncoding | noncoding |
| MSTRG. 119718. 1  |              | XLOC_123849 | 250 coding   | noncoding | noncoding | noncoding |
| MSTRG. 119751. 1  | LOC107986976 | XLOC_123855 | 351 coding   | noncoding | noncoding | noncoding |
| XM_017013400. 1   | KCNQ3        | XLOC_123862 | 20754 coding | coding    | coding    | coding    |
| NM_144649. 3      | TMEM71       | XLOC_123883 | 2000 coding  | coding    | coding    | coding    |
| MSTRG. 120012. 17 | PHF20L1      | XLOC_123886 | 410 coding   | noncoding | coding    | noncoding |
| MSTRG. 120012. 13 | PHF20L1      | XLOC_123886 | 2397 coding  | coding    | coding    | noncoding |

|                   |              |             |              |           |           |           |
|-------------------|--------------|-------------|--------------|-----------|-----------|-----------|
| MSTRG. 119935. 1  |              | XLOC_123951 | 288 coding   | noncoding | noncoding | noncoding |
| NM_003033. 4      | ST3GAL1      | XLOC_123953 | 6918 coding  | coding    | coding    | coding    |
| MSTRG. 119969. 1  |              | XLOC_123991 | 301 coding   | noncoding | noncoding | noncoding |
| MSTRG. 120122. 1  | LINC01591    | XLOC_124026 | 293 coding   | noncoding | noncoding | noncoding |
| MSTRG. 120144. 1  |              | XLOC_124047 | 242 coding   | noncoding | noncoding | noncoding |
| MSTRG. 120148. 1  |              | XLOC_124050 | 255 coding   | coding    | noncoding | noncoding |
| MSTRG. 120183. 1  |              | XLOC_124101 | 237 coding   | noncoding | noncoding | noncoding |
| MSTRG. 120199. 1  |              | XLOC_124111 | 323 coding   | noncoding | noncoding | noncoding |
| NR_161374. 1      | LOC401478    | XLOC_124115 | 4518 coding  | noncoding | coding    | coding    |
| NM_015912. 4      | FAM135B      | XLOC_124121 | 7401 coding  | coding    | coding    | coding    |
| MSTRG. 120294. 1  | FAM135B      | XLOC_124127 | 290 coding   | noncoding | noncoding | noncoding |
| MSTRG. 120344. 1  | COL22A1      | XLOC_124136 | 237 coding   | noncoding | noncoding | noncoding |
| MSTRG. 120346. 1  | COL22A1      | XLOC_124137 | 226 coding   | noncoding | noncoding | noncoding |
| MSTRG. 120302. 1  |              | XLOC_124141 | 315 coding   | noncoding | noncoding | noncoding |
| MSTRG. 120306. 1  |              | XLOC_124144 | 276 coding   | noncoding | noncoding | noncoding |
| MSTRG. 120309. 1  |              | XLOC_124145 | 261 coding   | noncoding | noncoding | noncoding |
| XM_011517102. 2   | KCNK9        | XLOC_124153 | 5242 coding  | coding    | coding    | coding    |
| MSTRG. 121073. 1  | TRAPPC9      | XLOC_124173 | 287 coding   | noncoding | noncoding | noncoding |
| MSTRG. 121093. 1  | TRAPPC9      | XLOC_124190 | 292 coding   | noncoding | noncoding | noncoding |
| MSTRG. 121094. 1  | TRAPPC9      | XLOC_124191 | 262 coding   | noncoding | noncoding | noncoding |
| XM_011516966. 3   | AGO2         | XLOC_124195 | 15325 coding | coding    | coding    | coding    |
| MSTRG. 120750. 1  | PTK2         | XLOC_124206 | 302 coding   | noncoding | noncoding | noncoding |
| MSTRG. 120760. 1  | PTK2         | XLOC_124216 | 277 coding   | noncoding | noncoding | noncoding |
| MSTRG. 120729. 1  |              | XLOC_124221 | 320 coding   | noncoding | noncoding | noncoding |
| MSTRG. 120731. 1  |              | XLOC_124222 | 247 coding   | noncoding | noncoding | noncoding |
| MSTRG. 120740. 1  |              | XLOC_124229 | 240 coding   | noncoding | noncoding | noncoding |
| MSTRG. 120937. 20 | DENND3       | XLOC_124231 | 3931 coding  | coding    | coding    | noncoding |
| MSTRG. 120959. 1  | SLC45A4      | XLOC_124246 | 257 coding   | noncoding | noncoding | noncoding |
| MSTRG. 120795. 1  |              | XLOC_124264 | 373 coding   | noncoding | noncoding | noncoding |
| XR_928307. 2      | TSNARE1      | XLOC_124269 | 5223 coding  | coding    | coding    | coding    |
| NM_177457. 5      | LYNX1        | XLOC_124297 | 4594 coding  | noncoding | coding    | coding    |
| MSTRG. 120886. 1  | LYNX1-SLURP2 | XLOC_124298 | 294 coding   | noncoding | noncoding | noncoding |
| MSTRG. 120912. 1  | LY6E-DT      | XLOC_124313 | 234 coding   | noncoding | noncoding | noncoding |
| MSTRG. 120972. 1  |              | XLOC_124337 | 233 coding   | noncoding | noncoding | noncoding |
| XM_011516943. 2   | ZC3H3        | XLOC_124354 | 2549 coding  | coding    | coding    | coding    |
| NM_001317783. 2   | TSTA3        | XLOC_124368 | 1391 coding  | coding    | coding    | coding    |
| MSTRG. 121102. 1  | SPATC1       | XLOC_124394 | 338 coding   | noncoding | noncoding | noncoding |
| MSTRG. 121161. 1  | MROH1        | XLOC_124412 | 266 coding   | noncoding | noncoding | noncoding |
| MSTRG. 121175. 1  | MROH1        | XLOC_124424 | 288 coding   | noncoding | coding    | noncoding |
| NM_012079. 6      | DGAT1        | XLOC_124430 | 3653 coding  | coding    | coding    | coding    |
| MSTRG. 121141. 10 | CPSF1        | XLOC_124434 | 270 coding   | noncoding | noncoding | noncoding |
| XM_017013870. 2   | ARHGAP39     | XLOC_124452 | 6023 coding  | coding    | coding    | coding    |
| MSTRG. 121219. 1  | ARHGAP39     | XLOC_124454 | 322 coding   | noncoding | noncoding | noncoding |

|                |              |             |             |           |           |           |
|----------------|--------------|-------------|-------------|-----------|-----------|-----------|
| MSTRG.121220.1 | ARHGAP39     | XLOC_124455 | 228 coding  | noncoding | noncoding | noncoding |
| NR_147501.1    | LOC100130027 | XLOC_124467 | 4389 coding | noncoding | coding    | coding    |
| MSTRG.121236.1 |              | XLOC_124471 | 279 coding  | noncoding | noncoding | noncoding |
| MSTRG.121237.1 |              | XLOC_124472 | 404 coding  | noncoding | noncoding | noncoding |
| MSTRG.121262.1 | ZNF252P      | XLOC_124477 | 225 coding  | noncoding | noncoding | noncoding |
| MSTRG.121277.1 |              | XLOC_124500 | 274 coding  | noncoding | noncoding | noncoding |
| XM_017015174.1 | DOCK8        | XLOC_124507 | 7388 coding | coding    | coding    | coding    |
| XM_011518049.2 | DOCK8        | XLOC_124507 | 6013 coding | coding    | coding    | coding    |
| XM_024447462.1 | KANK1        | XLOC_124512 | 6589 coding | coding    | coding    | coding    |
| NM_001354341.1 | KANK1        | XLOC_124512 | 5468 coding | coding    | coding    | coding    |
| MSTRG.121478.1 | KANK1        | XLOC_124515 | 319 coding  | noncoding | coding    | noncoding |
| MSTRG.121287.1 |              | XLOC_124516 | 310 coding  | noncoding | noncoding | noncoding |
| MSTRG.121295.1 | DMRT1        | XLOC_124519 | 540 coding  | noncoding | noncoding | noncoding |
| MSTRG.121296.1 |              | XLOC_124525 | 274 coding  | coding    | noncoding | noncoding |
| MSTRG.121317.1 |              | XLOC_124533 | 311 coding  | noncoding | noncoding | noncoding |
| MSTRG.121339.1 | LOC105375951 | XLOC_124539 | 244 coding  | noncoding | noncoding | noncoding |
| MSTRG.121346.1 |              | XLOC_124580 | 321 coding  | coding    | noncoding | noncoding |
| MSTRG.121348.1 |              | XLOC_124586 | 472 coding  | noncoding | noncoding | noncoding |
| MSTRG.121360.1 | VLDLR-AS1    | XLOC_124588 | 305 coding  | noncoding | noncoding | noncoding |
| MSTRG.121571.1 |              | XLOC_124733 | 297 coding  | noncoding | noncoding | noncoding |
| MSTRG.121579.1 | SPATA6L      | XLOC_124738 | 282 coding  | noncoding | noncoding | noncoding |
| MSTRG.121699.1 | RCL1         | XLOC_124766 | 268 coding  | noncoding | noncoding | noncoding |
| MSTRG.121702.1 |              | XLOC_124769 | 277 coding  | noncoding | noncoding | noncoding |
| MSTRG.121703.1 |              | XLOC_124770 | 287 coding  | noncoding | noncoding | noncoding |
| MSTRG.121707.1 |              | XLOC_124774 | 235 coding  | noncoding | noncoding | noncoding |
| NM_001322194.1 | JAK2         | XLOC_124780 | 5386 coding | coding    | coding    | coding    |
| MSTRG.121717.7 | JAK2         | XLOC_124780 | 465 coding  | coding    | noncoding | noncoding |
| MSTRG.121710.1 |              | XLOC_124810 | 235 coding  | noncoding | noncoding | noncoding |
| MSTRG.121941.1 | RIC1         | XLOC_124858 | 283 coding  | noncoding | noncoding | noncoding |
| MSTRG.121954.1 | RIC1         | XLOC_124871 | 387 coding  | coding    | noncoding | noncoding |
| MSTRG.121978.5 | MIR4665      | XLOC_124886 | 1572 coding | coding    | coding    | noncoding |
| MSTRG.121786.1 |              | XLOC_124888 | 310 coding  | coding    | noncoding | noncoding |
| MSTRG.121787.1 |              | XLOC_124889 | 290 coding  | noncoding | noncoding | noncoding |
| MSTRG.121795.1 | LOC107987046 | XLOC_124892 | 219 coding  | coding    | noncoding | noncoding |
| MSTRG.121796.1 | LOC107987046 | XLOC_124893 | 256 coding  | noncoding | noncoding | noncoding |
| MSTRG.121811.1 | GLDC         | XLOC_124908 | 251 coding  | noncoding | noncoding | noncoding |
| MSTRG.121813.1 |              | XLOC_124912 | 220 coding  | noncoding | noncoding | noncoding |
| MSTRG.122077.1 | KDM4C        | XLOC_124916 | 308 coding  | noncoding | noncoding | noncoding |
| MSTRG.122079.1 | KDM4C        | XLOC_124917 | 358 coding  | noncoding | noncoding | noncoding |
| MSTRG.121879.1 |              | XLOC_124964 | 282 coding  | noncoding | noncoding | noncoding |
| MSTRG.121891.3 | DMAC1        | XLOC_124967 | 647 coding  | coding    | coding    | noncoding |
| MSTRG.121891.2 | DMAC1        | XLOC_124967 | 646 coding  | coding    | coding    | noncoding |
| MSTRG.121903.1 |              | XLOC_124971 | 238 coding  | noncoding | noncoding | noncoding |

|                  |              |             |              |           |           |           |
|------------------|--------------|-------------|--------------|-----------|-----------|-----------|
| MSTRG. 121908. 1 |              | XLOC_124974 | 281 coding   | noncoding | noncoding | noncoding |
| MSTRG. 122242. 1 | PTPRD        | XLOC_124985 | 220 coding   | noncoding | noncoding | noncoding |
| MSTRG. 122252. 1 | PTPRD        | XLOC_124995 | 206 coding   | noncoding | noncoding | noncoding |
| MSTRG. 122261. 1 | PTPRD        | XLOC_124997 | 310 coding   | noncoding | noncoding | noncoding |
| MSTRG. 122266. 1 | PTPRD        | XLOC_124999 | 228 coding   | noncoding | noncoding | noncoding |
| MSTRG. 122279. 1 | PTPRD        | XLOC_125005 | 265 coding   | noncoding | noncoding | noncoding |
| MSTRG. 122291. 1 | PTPRD        | XLOC_125011 | 295 coding   | noncoding | noncoding | noncoding |
| MSTRG. 122293. 1 | PTPRD        | XLOC_125013 | 276 coding   | noncoding | noncoding | noncoding |
| MSTRG. 122314. 1 | PTPRD        | XLOC_125026 | 297 coding   | noncoding | noncoding | noncoding |
| MSTRG. 122318. 1 | PTPRD        | XLOC_125029 | 238 coding   | noncoding | noncoding | noncoding |
| MSTRG. 122005. 1 |              | XLOC_125031 | 202 coding   | coding    | noncoding | noncoding |
| MSTRG. 122011. 1 |              | XLOC_125032 | 271 coding   | noncoding | noncoding | noncoding |
| MSTRG. 122137. 1 |              | XLOC_125070 | 274 coding   | noncoding | noncoding | noncoding |
| MSTRG. 122144. 1 |              | XLOC_125082 | 225 coding   | noncoding | noncoding | noncoding |
| MSTRG. 122175. 1 | LOC101929507 | XLOC_125086 | 309 coding   | noncoding | noncoding | noncoding |
| MSTRG. 122178. 1 | LOC101929507 | XLOC_125087 | 318 coding   | noncoding | noncoding | noncoding |
| MSTRG. 122322. 1 |              | XLOC_125124 | 261 coding   | noncoding | noncoding | noncoding |
| MSTRG. 122324. 1 |              | XLOC_125132 | 312 coding   | coding    | noncoding | noncoding |
| MSTRG. 122329. 1 |              | XLOC_125134 | 276 coding   | noncoding | noncoding | noncoding |
| MSTRG. 122330. 1 |              | XLOC_125135 | 253 coding   | noncoding | noncoding | noncoding |
| MSTRG. 122332. 1 |              | XLOC_125137 | 285 coding   | noncoding | noncoding | noncoding |
| MSTRG. 122369. 1 |              | XLOC_125142 | 321 coding   | noncoding | noncoding | noncoding |
| MSTRG. 122386. 1 |              | XLOC_125144 | 277 coding   | noncoding | noncoding | noncoding |
| XM_017014443. 1  | CCDC171      | XLOC_125146 | 5662 coding  | noncoding | coding    | coding    |
| MSTRG. 122418. 1 | CCDC171      | XLOC_125148 | 417 coding   | noncoding | noncoding | noncoding |
| MSTRG. 122427. 1 | CCDC171      | XLOC_125150 | 305 coding   | noncoding | noncoding | noncoding |
| MSTRG. 122461. 1 |              | XLOC_125201 | 242 coding   | noncoding | noncoding | noncoding |
| MSTRG. 122463. 1 |              | XLOC_125203 | 296 coding   | noncoding | noncoding | noncoding |
| MSTRG. 122476. 1 |              | XLOC_125224 | 291 coding   | noncoding | noncoding | noncoding |
| XM_017015310. 1  | ADAMTSL1     | XLOC_125225 | 14618 coding | coding    | coding    | coding    |
| MSTRG. 122586. 1 |              | XLOC_125252 | 260 coding   | noncoding | noncoding | noncoding |
| XM_017014918. 1  | DENND4C      | XLOC_125253 | 7503 coding  | coding    | coding    | coding    |
| MSTRG. 122611. 1 | ACER2        | XLOC_125255 | 267 coding   | noncoding | noncoding | noncoding |
| MSTRG. 122659. 2 | MLLT3        | XLOC_125278 | 2793 coding  | coding    | noncoding | noncoding |
| MSTRG. 122713. 1 |              | XLOC_125292 | 236 coding   | noncoding | noncoding | noncoding |
| MSTRG. 122724. 1 |              | XLOC_125305 | 516 coding   | noncoding | noncoding | noncoding |
| MSTRG. 122725. 1 |              | XLOC_125306 | 222 coding   | noncoding | noncoding | noncoding |
| MSTRG. 122742. 1 |              | XLOC_125330 | 312 coding   | noncoding | noncoding | noncoding |
| MSTRG. 122810. 1 |              | XLOC_125358 | 300 coding   | coding    | noncoding | noncoding |
| MSTRG. 122814. 1 |              | XLOC_125360 | 483 coding   | noncoding | noncoding | noncoding |
| MSTRG. 122815. 1 |              | XLOC_125361 | 222 coding   | noncoding | noncoding | noncoding |
| MSTRG. 122830. 1 |              | XLOC_125376 | 251 coding   | noncoding | noncoding | noncoding |
| MSTRG. 122903. 1 | LOC105375993 | XLOC_125391 | 274 coding   | noncoding | noncoding | noncoding |

|                 |              |             |             |           |           |           |
|-----------------|--------------|-------------|-------------|-----------|-----------|-----------|
| MSTRG.122900.1  |              | XLOC_125394 | 221 coding  | noncoding | noncoding | noncoding |
| MSTRG.122912.1  |              | XLOC_125398 | 308 coding  | noncoding | noncoding | noncoding |
| MSTRG.122926.1  |              | XLOC_125403 | 247 coding  | noncoding | noncoding | noncoding |
| MSTRG.122935.1  |              | XLOC_125405 | 265 coding  | noncoding | noncoding | noncoding |
| MSTRG.122941.1  |              | XLOC_125408 | 218 coding  | noncoding | noncoding | noncoding |
| MSTRG.123001.1  | LOC105375999 | XLOC_125436 | 251 coding  | noncoding | noncoding | noncoding |
| MSTRG.123120.16 | C9orf72      | XLOC_125462 | 2891 coding | coding    | coding    | noncoding |
| MSTRG.123073.1  |              | XLOC_125463 | 316 coding  | noncoding | noncoding | noncoding |
| MSTRG.123092.1  |              | XLOC_125470 | 261 coding  | noncoding | noncoding | noncoding |
| MSTRG.123088.1  |              | XLOC_125495 | 505 coding  | noncoding | noncoding | noncoding |
| MSTRG.124077.1  | LINGO2       | XLOC_125498 | 262 coding  | noncoding | noncoding | noncoding |
| MSTRG.124158.1  | LINGO2       | XLOC_125556 | 227 coding  | noncoding | noncoding | noncoding |
| MSTRG.123159.1  |              | XLOC_125783 | 267 coding  | noncoding | noncoding | noncoding |
| MSTRG.123163.1  |              | XLOC_125786 | 239 coding  | noncoding | noncoding | noncoding |
| MSTRG.123174.1  |              | XLOC_125792 | 335 coding  | noncoding | noncoding | noncoding |
| MSTRG.123204.1  |              | XLOC_125807 | 270 coding  | coding    | noncoding | noncoding |
| MSTRG.123210.1  |              | XLOC_125812 | 280 coding  | noncoding | noncoding | noncoding |
| MSTRG.123227.1  |              | XLOC_125820 | 247 coding  | noncoding | noncoding | noncoding |
| MSTRG.123230.1  |              | XLOC_125823 | 281 coding  | noncoding | noncoding | noncoding |
| MSTRG.123234.1  |              | XLOC_125824 | 317 coding  | coding    | noncoding | noncoding |
| MSTRG.123235.1  |              | XLOC_125825 | 229 coding  | coding    | noncoding | noncoding |
| MSTRG.123247.1  | LOC105376011 | XLOC_125828 | 252 coding  | noncoding | noncoding | noncoding |
| MSTRG.123249.1  | LOC105376011 | XLOC_125829 | 208 coding  | noncoding | noncoding | noncoding |
| MSTRG.123238.1  |              | XLOC_125830 | 215 coding  | noncoding | noncoding | noncoding |
| MSTRG.123252.1  |              | XLOC_125836 | 275 coding  | noncoding | noncoding | noncoding |
| MSTRG.123264.1  |              | XLOC_125850 | 260 coding  | noncoding | noncoding | noncoding |
| MSTRG.123281.1  |              | XLOC_125883 | 228 coding  | noncoding | noncoding | noncoding |
| MSTRG.123322.1  | NFX1         | XLOC_125891 | 266 coding  | noncoding | noncoding | noncoding |
| MSTRG.123386.1  | LOC107987061 | XLOC_125902 | 270 coding  | noncoding | noncoding | noncoding |
| MSTRG.123425.1  | TRBV20OR9-2  | XLOC_125911 | 247 coding  | noncoding | noncoding | noncoding |
| MSTRG.123448.1  | TRBV20OR9-2  | XLOC_125921 | 264 coding  | noncoding | noncoding | noncoding |
| MSTRG.123462.11 | UBAP2        | XLOC_125934 | 369 coding  | coding    | noncoding | noncoding |
| XM_011517900.1  | UBAP1        | XLOC_125939 | 2675 coding | noncoding | coding    | coding    |
| MSTRG.123402.1  | KIF24        | XLOC_125945 | 243 coding  | noncoding | noncoding | noncoding |
| NR_052010.1     | IL11RA       | XLOC_125971 | 1776 coding | noncoding | coding    | coding    |
| MSTRG.123525.1  | PHF24        | XLOC_125978 | 272 coding  | coding    | noncoding | noncoding |
| MSTRG.123527.1  | PHF24        | XLOC_125979 | 290 coding  | noncoding | noncoding | noncoding |
| XM_005251428.3  | DNAJB5       | XLOC_125984 | 2362 coding | coding    | coding    | coding    |
| MSTRG.123543.1  |              | XLOC_125996 | 326 coding  | noncoding | noncoding | noncoding |
| MSTRG.123561.1  |              | XLOC_126011 | 277 coding  | noncoding | noncoding | noncoding |
| MSTRG.123590.1  | UNC13B       | XLOC_126016 | 280 coding  | noncoding | noncoding | noncoding |
| MSTRG.123568.1  | ATP8B5P      | XLOC_126019 | 260 coding  | noncoding | noncoding | noncoding |
| NM_016446.3     | TMEM8B       | XLOC_126057 | 2153 coding | coding    | coding    | coding    |

|                  |              |             |             |           |           |           |
|------------------|--------------|-------------|-------------|-----------|-----------|-----------|
| MSTRG. 123675. 1 | RECK         | XLOC_126076 | 258 coding  | noncoding | noncoding | noncoding |
| MSTRG. 123684. 1 | GLIPR2       | XLOC_126082 | 305 coding  | noncoding | noncoding | noncoding |
| MSTRG. 123661. 1 |              | XLOC_126086 | 225 coding  | noncoding | noncoding | noncoding |
| MSTRG. 123677. 1 |              | XLOC_126087 | 242 coding  | noncoding | noncoding | noncoding |
| MSTRG. 123753. 1 | LOC102724322 | XLOC_126095 | 250 coding  | noncoding | noncoding | noncoding |
| MSTRG. 123771. 1 |              | XLOC_126101 | 277 coding  | noncoding | noncoding | noncoding |
| MSTRG. 123767. 1 |              | XLOC_126102 | 284 coding  | noncoding | noncoding | noncoding |
| MSTRG. 123858. 1 |              | XLOC_126122 | 242 coding  | noncoding | noncoding | noncoding |
| NM_001289119. 1  | ZCCHC7       | XLOC_126124 | 2690 coding | coding    | coding    | coding    |
| XR_001746665. 1  | LOC105376033 | XLOC_126132 | 1608 coding | noncoding | noncoding | noncoding |
| MSTRG. 123841. 1 | FBXO10       | XLOC_126180 | 260 coding  | coding    | noncoding | noncoding |
| XM_017014481. 1  | FRMPD1       | XLOC_126184 | 5292 coding | coding    | coding    | coding    |
| MSTRG. 123828. 1 | FRMPD1       | XLOC_126188 | 248 coding  | noncoding | noncoding | noncoding |
| XM_005251577. 4  | DCAF10       | XLOC_126193 | 2175 coding | coding    | coding    | coding    |
| XM_017015128. 1  | DCAF10       | XLOC_126193 | 1976 coding | noncoding | coding    | coding    |
| MSTRG. 123920. 1 | SHB          | XLOC_126207 | 693 coding  | coding    | noncoding | noncoding |
| MSTRG. 123981. 1 |              | XLOC_126234 | 223 coding  | noncoding | noncoding | noncoding |
| MSTRG. 123988. 1 |              | XLOC_126245 | 369 coding  | noncoding | noncoding | noncoding |
| MSTRG. 123996. 1 | LOC105376043 | XLOC_126249 | 273 coding  | noncoding | noncoding | noncoding |
| MSTRG. 124008. 1 |              | XLOC_126253 | 211 coding  | noncoding | noncoding | noncoding |
| MSTRG. 124490. 1 |              | XLOC_126326 | 764 coding  | coding    | coding    | coding    |
| MSTRG. 124523. 1 |              | XLOC_126332 | 499 coding  | coding    | noncoding | noncoding |
| MSTRG. 124534. 3 | FRG1HP       | XLOC_126341 | 215 coding  | noncoding | noncoding | noncoding |
| MSTRG. 124544. 1 | PGM5P2       | XLOC_126351 | 270 coding  | noncoding | noncoding | noncoding |
| MSTRG. 124581. 1 |              | XLOC_126386 | 233 coding  | noncoding | noncoding | noncoding |
| MSTRG. 124582. 1 |              | XLOC_126387 | 224 coding  | noncoding | noncoding | noncoding |
| XR_929667. 3     | LOC105376063 | XLOC_126389 | 4437 coding | noncoding | coding    | noncoding |
| MSTRG. 124591. 1 |              | XLOC_126391 | 228 coding  | noncoding | noncoding | noncoding |
| MSTRG. 124602. 1 | CNTNAP3B     | XLOC_126394 | 500 coding  | noncoding | noncoding | noncoding |
| MSTRG. 124609. 1 | CNTNAP3B     | XLOC_126399 | 270 coding  | noncoding | noncoding | noncoding |
| XM_011517871. 3  | SPATA31A6    | XLOC_126404 | 4215 coding | coding    | coding    | coding    |
| MSTRG. 124658. 1 |              | XLOC_126409 | 308 coding  | noncoding | noncoding | noncoding |
| MSTRG. 124698. 1 |              | XLOC_126428 | 216 coding  | noncoding | noncoding | noncoding |
| MSTRG. 124752. 1 |              | XLOC_126466 | 280 coding  | noncoding | noncoding | noncoding |
| MSTRG. 124757. 1 |              | XLOC_126468 | 550 coding  | noncoding | noncoding | noncoding |
| MSTRG. 124767. 1 | LOC107987008 | XLOC_126476 | 304 coding  | noncoding | noncoding | noncoding |
| MSTRG. 124826. 1 | LINC01189    | XLOC_126480 | 321 coding  | noncoding | noncoding | noncoding |
| MSTRG. 124821. 1 |              | XLOC_126524 | 266 coding  | noncoding | noncoding | noncoding |
| MSTRG. 124915. 1 |              | XLOC_126549 | 412 coding  | noncoding | noncoding | noncoding |
| MSTRG. 124931. 1 |              | XLOC_126561 | 398 coding  | noncoding | noncoding | noncoding |
| NM_199244. 3     | FOXD4L4      | XLOC_126585 | 1251 coding | coding    | coding    | coding    |
| XR_950683. 2     | LOC105379448 | XLOC_126603 | 4252 coding | noncoding | noncoding | noncoding |
| MSTRG. 124988. 1 |              | XLOC_126605 | 275 coding  | noncoding | noncoding | noncoding |

|                  |              |             |              |           |           |           |
|------------------|--------------|-------------|--------------|-----------|-----------|-----------|
| MSTRG. 124989. 1 |              | XLOC_126606 | 238 coding   | noncoding | noncoding | noncoding |
| MSTRG. 125000. 1 |              | XLOC_126614 | 276 coding   | noncoding | noncoding | noncoding |
| MSTRG. 125004. 1 |              | XLOC_126616 | 383 coding   | noncoding | noncoding | noncoding |
| NR_111893. 2     | CNTNAP3P2    | XLOC_126618 | 7649 coding  | coding    | coding    | coding    |
| MSTRG. 125066. 1 |              | XLOC_126626 | 400 coding   | noncoding | noncoding | noncoding |
| MSTRG. 125067. 1 |              | XLOC_126627 | 297 coding   | noncoding | noncoding | noncoding |
| MSTRG. 125099. 1 | CBWD3        | XLOC_126646 | 318 coding   | coding    | noncoding | noncoding |
| XM_011519082. 2  | PIP5K1B      | XLOC_126686 | 5608 coding  | coding    | coding    | coding    |
| MSTRG. 125205. 1 |              | XLOC_126716 | 216 coding   | noncoding | noncoding | noncoding |
| MSTRG. 125264. 2 | PTAR1        | XLOC_126739 | 10102 coding | coding    | coding    | noncoding |
| MSTRG. 125277. 1 | LOC105376076 | XLOC_126741 | 284 coding   | noncoding | noncoding | noncoding |
| MSTRG. 125248. 1 |              | XLOC_126746 | 272 coding   | noncoding | noncoding | noncoding |
| MSTRG. 125279. 1 |              | XLOC_126768 | 259 coding   | noncoding | noncoding | noncoding |
| XR_001746711. 2  | LOC101927086 | XLOC_126769 | 4319 coding  | noncoding | coding    | noncoding |
| MSTRG. 125343. 1 | TRPM3        | XLOC_126773 | 315 coding   | noncoding | noncoding | noncoding |
| MSTRG. 125348. 1 | TRPM3        | XLOC_126776 | 325 coding   | noncoding | noncoding | noncoding |
| MSTRG. 125378. 1 | TRPM3        | XLOC_126792 | 230 coding   | noncoding | noncoding | noncoding |
| MSTRG. 125285. 1 |              | XLOC_126795 | 448 coding   | noncoding | noncoding | noncoding |
| MSTRG. 125288. 1 |              | XLOC_126797 | 291 coding   | noncoding | noncoding | noncoding |
| MSTRG. 125289. 1 |              | XLOC_126798 | 250 coding   | noncoding | noncoding | noncoding |
| MSTRG. 125483. 1 | C9orf85      | XLOC_126836 | 545 coding   | noncoding | noncoding | noncoding |
| MSTRG. 125432. 1 | GDA          | XLOC_126844 | 241 coding   | noncoding | noncoding | noncoding |
| MSTRG. 125425. 1 |              | XLOC_126846 | 219 coding   | noncoding | noncoding | noncoding |
| MSTRG. 125455. 1 |              | XLOC_126854 | 260 coding   | noncoding | noncoding | noncoding |
| NM_138691. 2     | TMC1         | XLOC_126856 | 3201 coding  | coding    | coding    | coding    |
| MSTRG. 125514. 1 | TMC1         | XLOC_126865 | 300 coding   | noncoding | noncoding | noncoding |
| MSTRG. 125458. 1 |              | XLOC_126868 | 324 coding   | noncoding | noncoding | noncoding |
| XM_017014657. 1  | ANXA1        | XLOC_126882 | 1481 coding  | coding    | coding    | coding    |
| MSTRG. 125579. 1 |              | XLOC_126899 | 306 coding   | noncoding | noncoding | noncoding |
| MSTRG. 125596. 1 | LOC101927329 | XLOC_126906 | 262 coding   | noncoding | noncoding | noncoding |
| MSTRG. 125707. 1 |              | XLOC_126955 | 278 coding   | noncoding | noncoding | noncoding |
| MSTRG. 125709. 1 |              | XLOC_126960 | 284 coding   | noncoding | noncoding | noncoding |
| MSTRG. 125839. 1 | PCSK5        | XLOC_126973 | 260 coding   | noncoding | noncoding | noncoding |
| MSTRG. 125841. 1 | PCSK5        | XLOC_126975 | 218 coding   | noncoding | noncoding | noncoding |
| MSTRG. 125870. 1 | PCSK5        | XLOC_126985 | 301 coding   | noncoding | noncoding | noncoding |
| MSTRG. 125814. 1 | PRUNE2       | XLOC_127007 | 324 coding   | noncoding | noncoding | noncoding |
| MSTRG. 125817. 1 | PRUNE2       | XLOC_127009 | 375 coding   | noncoding | noncoding | noncoding |
| MSTRG. 125759. 1 |              | XLOC_127010 | 309 coding   | noncoding | noncoding | noncoding |
| MSTRG. 125758. 1 |              | XLOC_127011 | 210 coding   | noncoding | noncoding | noncoding |
| MSTRG. 125764. 1 |              | XLOC_127014 | 271 coding   | noncoding | noncoding | noncoding |
| MSTRG. 125891. 1 | VPS13A       | XLOC_127029 | 220 coding   | noncoding | noncoding | noncoding |
| MSTRG. 125904. 1 | GNA14        | XLOC_127039 | 229 coding   | noncoding | noncoding | noncoding |
| MSTRG. 126059. 9 | GNAQ         | XLOC_127048 | 3140 coding  | coding    | noncoding | noncoding |

|                 |              |             |              |           |           |           |
|-----------------|--------------|-------------|--------------|-----------|-----------|-----------|
| NM_001330691.3  | CEP78        | XLOC_127060 | 11233 coding | coding    | coding    | coding    |
| MSTRG.125939.1  | LOC107987083 | XLOC_127070 | 717 coding   | noncoding | noncoding | noncoding |
| MSTRG.125953.1  |              | XLOC_127078 | 301 coding   | noncoding | noncoding | noncoding |
| MSTRG.126040.1  |              | XLOC_127089 | 222 coding   | noncoding | noncoding | noncoding |
| MSTRG.125962.1  |              | XLOC_127095 | 230 coding   | noncoding | noncoding | noncoding |
| MSTRG.125969.1  |              | XLOC_127097 | 283 coding   | noncoding | noncoding | noncoding |
| MSTRG.126160.1  |              | XLOC_127158 | 247 coding   | noncoding | noncoding | noncoding |
| MSTRG.126167.1  |              | XLOC_127169 | 295 coding   | noncoding | noncoding | noncoding |
| MSTRG.126313.1  |              | XLOC_127200 | 274 coding   | noncoding | noncoding | noncoding |
| MSTRG.126320.1  |              | XLOC_127204 | 296 coding   | noncoding | noncoding | noncoding |
| MSTRG.126326.1  |              | XLOC_127205 | 304 coding   | noncoding | noncoding | noncoding |
| MSTRG.126336.1  | LOC101927502 | XLOC_127222 | 215 coding   | noncoding | noncoding | noncoding |
| MSTRG.126341.1  | LOC101927502 | XLOC_127224 | 258 coding   | noncoding | noncoding | noncoding |
| MSTRG.126360.1  | LOC105376107 | XLOC_127236 | 315 coding   | noncoding | noncoding | noncoding |
| MSTRG.126372.1  |              | XLOC_127257 | 272 coding   | noncoding | noncoding | noncoding |
| MSTRG.126598.1  | FRMD3        | XLOC_127290 | 318 coding   | noncoding | noncoding | noncoding |
| MSTRG.126470.1  |              | XLOC_127300 | 371 coding   | noncoding | noncoding | noncoding |
| MSTRG.126504.5  | RM11         | XLOC_127301 | 8442 coding  | coding    | coding    | coding    |
| MSTRG.126510.1  | RM11         | XLOC_127302 | 239 coding   | noncoding | noncoding | noncoding |
| MSTRG.126478.1  |              | XLOC_127304 | 212 coding   | noncoding | noncoding | noncoding |
| MSTRG.126481.1  |              | XLOC_127311 | 262 coding   | noncoding | noncoding | noncoding |
| MSTRG.126517.1  | LOC102724036 | XLOC_127314 | 302 coding   | noncoding | noncoding | noncoding |
| MSTRG.126546.1  | NTRK2        | XLOC_127318 | 296 coding   | noncoding | noncoding | noncoding |
| MSTRG.126638.15 | AGTPBP1      | XLOC_127332 | 3787 coding  | coding    | coding    | noncoding |
| MSTRG.126622.1  |              | XLOC_127339 | 268 coding   | noncoding | coding    | noncoding |
| MSTRG.126634.1  |              | XLOC_127346 | 319 coding   | noncoding | noncoding | noncoding |
| MSTRG.126636.1  |              | XLOC_127347 | 228 coding   | noncoding | noncoding | noncoding |
| MSTRG.126698.1  |              | XLOC_127364 | 394 coding   | noncoding | noncoding | noncoding |
| MSTRG.126718.1  |              | XLOC_127375 | 270 coding   | noncoding | noncoding | noncoding |
| MSTRG.126725.1  | LOC440173    | XLOC_127378 | 252 coding   | noncoding | noncoding | noncoding |
| MSTRG.126740.1  |              | XLOC_127390 | 336 coding   | noncoding | noncoding | noncoding |
| MSTRG.126752.1  |              | XLOC_127392 | 372 coding   | noncoding | noncoding | noncoding |
| MSTRG.126753.1  |              | XLOC_127393 | 220 coding   | noncoding | noncoding | noncoding |
| XM_011518702.1  | SPATA31C1    | XLOC_127420 | 4336 coding  | coding    | coding    | coding    |
| MSTRG.126776.1  |              | XLOC_127421 | 289 coding   | noncoding | coding    | noncoding |
| MSTRG.126804.1  |              | XLOC_127428 | 258 coding   | noncoding | noncoding | noncoding |
| MSTRG.126867.1  | SHC3         | XLOC_127449 | 296 coding   | noncoding | noncoding | noncoding |
| MSTRG.126869.1  | SHC3         | XLOC_127450 | 223 coding   | noncoding | noncoding | noncoding |
| MSTRG.127045.48 | SEMA4D       | XLOC_127471 | 5316 coding  | coding    | coding    | coding    |
| MSTRG.127045.49 | SEMA4D       | XLOC_127471 | 5861 coding  | coding    | coding    | coding    |
| MSTRG.127045.47 | SEMA4D       | XLOC_127471 | 11055 coding | coding    | coding    | coding    |
| MSTRG.127047.1  | SEMA4D       | XLOC_127472 | 9863 coding  | noncoding | coding    | noncoding |
| MSTRG.126902.1  |              | XLOC_127478 | 264 coding   | noncoding | noncoding | noncoding |

|                  |                             |             |             |           |           |           |
|------------------|-----------------------------|-------------|-------------|-----------|-----------|-----------|
| MSTRG. 126928. 1 |                             | XLOC_127497 | 280 coding  | noncoding | noncoding | noncoding |
| MSTRG. 126951. 1 | DIRAS2                      | XLOC_127504 | 239 coding  | noncoding | noncoding | noncoding |
| MSTRG. 127012. 1 |                             | XLOC_127581 | 245 coding  | noncoding | noncoding | noncoding |
| MSTRG. 126999. 1 |                             | XLOC_127584 | 453 coding  | noncoding | noncoding | noncoding |
| MSTRG. 127035. 1 | ROR2                        | XLOC_127597 | 203 coding  | noncoding | noncoding | noncoding |
| MSTRG. 127021. 1 |                             | XLOC_127599 | 321 coding  | noncoding | noncoding | noncoding |
| MSTRG. 127053. 1 |                             | XLOC_127609 | 219 coding  | noncoding | noncoding | noncoding |
| MSTRG. 127233. 1 | LOC107987095                | XLOC_127617 | 295 coding  | noncoding | noncoding | noncoding |
| MSTRG. 127072. 1 |                             | XLOC_127625 | 204 coding  | noncoding | noncoding | noncoding |
| MSTRG. 127240. 1 | FGD3                        | XLOC_127634 | 289 coding  | noncoding | noncoding | noncoding |
| MSTRG. 127249. 1 | FGD3                        | XLOC_127642 | 772 coding  | coding    | noncoding | noncoding |
| MSTRG. 127234. 1 |                             | XLOC_127657 | 241 coding  | noncoding | noncoding | noncoding |
| MSTRG. 127274. 1 |                             | XLOC_127667 | 279 coding  | noncoding | noncoding | noncoding |
| MSTRG. 127294. 1 |                             | XLOC_127709 | 320 coding  | noncoding | noncoding | noncoding |
| XM_017015403. 1  | LOC107987099                | XLOC_127717 | 2265 coding | coding    | coding    | coding    |
| MSTRG. 127349. 1 | LINC02603                   | XLOC_127727 | 266 coding  | noncoding | noncoding | noncoding |
| XM_011519114. 2  | MFSD14B                     | XLOC_127733 | 2989 coding | coding    | coding    | coding    |
| MSTRG. 127380. 1 | MFSD14B                     | XLOC_127740 | 225 coding  | noncoding | noncoding | noncoding |
| MSTRG. 127381. 1 | MFSD14B                     | XLOC_127741 | 229 coding  | noncoding | noncoding | noncoding |
| MSTRG. 127369. 1 |                             | XLOC_127748 | 229 coding  | noncoding | noncoding | noncoding |
| MSTRG. 127710. 1 | AOPEP                       | XLOC_127755 | 439 coding  | noncoding | noncoding | noncoding |
| MSTRG. 127714. 1 | AOPEP                       | XLOC_127758 | 274 coding  | noncoding | noncoding | noncoding |
| MSTRG. 127716. 1 | AOPEP                       | XLOC_127760 | 280 coding  | noncoding | noncoding | noncoding |
| MSTRG. 127442. 1 |                             | XLOC_127785 | 324 coding  | noncoding | noncoding | noncoding |
| MSTRG. 127447. 1 | LOC105376156                | XLOC_127787 | 241 coding  | noncoding | noncoding | noncoding |
| MSTRG. 127451. 1 | LOC105376157                | XLOC_127808 | 290 coding  | noncoding | noncoding | noncoding |
| MSTRG. 127561. 1 | LINC00476                   | XLOC_127821 | 258 coding  | noncoding | noncoding | noncoding |
| MSTRG. 127500. 1 |                             | XLOC_127835 | 268 coding  | noncoding | noncoding | noncoding |
| MSTRG. 127538. 1 | CDC14B                      | XLOC_127847 | 247 coding  | noncoding | noncoding | noncoding |
| MSTRG. 127527. 1 |                             | XLOC_127855 | 219 coding  | noncoding | noncoding | noncoding |
| MSTRG. 127529. 1 |                             | XLOC_127858 | 261 coding  | noncoding | noncoding | noncoding |
| NR_026792. 1     | LOC441455                   | XLOC_127859 | 1647 coding | coding    | coding    | coding    |
| MSTRG. 127672. 1 | ZNF782                      | XLOC_127871 | 391 coding  | noncoding | noncoding | noncoding |
| MSTRG. 127584. 1 |                             | XLOC_127884 | 342 coding  | noncoding | noncoding | noncoding |
| MSTRG. 127587. 1 |                             | XLOC_127885 | 255 coding  | noncoding | noncoding | noncoding |
| MSTRG. 127615. 1 | SUGT1P4-STRA6LP-<br>CCDC180 | XLOC_127900 | 295 coding  | noncoding | noncoding | noncoding |
| MSTRG. 127789. 1 | PTCSC2                      | XLOC_127926 | 232 coding  | noncoding | noncoding | noncoding |
| MSTRG. 127792. 1 | PTCSC2                      | XLOC_127928 | 245 coding  | coding    | noncoding | noncoding |
| MSTRG. 127836. 2 | ANP32B                      | XLOC_127952 | 466 coding  | noncoding | noncoding | noncoding |
| MSTRG. 127823. 1 |                             | XLOC_127954 | 275 coding  | noncoding | noncoding | noncoding |
| MSTRG. 127854. 3 | TBC1D2                      | XLOC_127966 | 2031 coding | coding    | coding    | coding    |
| MSTRG. 127866. 1 | GABBR2                      | XLOC_127971 | 310 coding  | noncoding | noncoding | noncoding |

|                  |              |             |              |           |           |           |
|------------------|--------------|-------------|--------------|-----------|-----------|-----------|
| MSTRG. 127867. 1 | GABBR2       | XLOC_127972 | 225 coding   | noncoding | noncoding | noncoding |
| MSTRG. 127871. 1 | GABBR2       | XLOC_127976 | 256 coding   | coding    | noncoding | noncoding |
| NM_001306210. 2  | TGFBR1       | XLOC_127998 | 6504 coding  | coding    | coding    | coding    |
| MSTRG. 127973. 1 | LOC101928438 | XLOC_128029 | 234 coding   | noncoding | noncoding | noncoding |
| MSTRG. 127984. 1 |              | XLOC_128039 | 247 coding   | noncoding | noncoding | noncoding |
| MSTRG. 128221. 1 | INVS         | XLOC_128058 | 255 coding   | noncoding | noncoding | noncoding |
| MSTRG. 128002. 1 | MSANTD3      | XLOC_128071 | 314 coding   | noncoding | noncoding | noncoding |
| MSTRG. 128012. 1 | TMEFF1       | XLOC_128076 | 248 coding   | noncoding | noncoding | noncoding |
| MSTRG. 128113. 3 | RNF20        | XLOC_128099 | 2167 coding  | coding    | coding    | coding    |
| MSTRG. 128120. 1 | RNF20        | XLOC_128105 | 304 coding   | noncoding | noncoding | noncoding |
| MSTRG. 128049. 1 |              | XLOC_128124 | 295 coding   | noncoding | noncoding | noncoding |
| MSTRG. 128071. 1 |              | XLOC_128132 | 252 coding   | noncoding | noncoding | noncoding |
| MSTRG. 128085. 1 | LINC01492    | XLOC_128137 | 296 coding   | coding    | noncoding | noncoding |
| MSTRG. 128090. 1 | LINC01492    | XLOC_128139 | 207 coding   | noncoding | noncoding | noncoding |
| MSTRG. 128168. 1 |              | XLOC_128161 | 285 coding   | coding    | noncoding | noncoding |
| MSTRG. 128169. 1 |              | XLOC_128162 | 301 coding   | noncoding | noncoding | noncoding |
| MSTRG. 128181. 1 |              | XLOC_128170 | 229 coding   | noncoding | noncoding | noncoding |
| MSTRG. 128183. 1 |              | XLOC_128172 | 413 coding   | noncoding | noncoding | noncoding |
| MSTRG. 128187. 1 |              | XLOC_128174 | 261 coding   | noncoding | noncoding | noncoding |
| MSTRG. 128272. 1 | LOC112268038 | XLOC_128225 | 318 coding   | noncoding | noncoding | noncoding |
| MSTRG. 128282. 1 | SLC44A1      | XLOC_128234 | 277 coding   | noncoding | noncoding | noncoding |
| MSTRG. 128289. 1 | SLC44A1      | XLOC_128236 | 273 coding   | noncoding | noncoding | noncoding |
| MSTRG. 128290. 1 | SLC44A1      | XLOC_128237 | 420 coding   | noncoding | noncoding | noncoding |
| MSTRG. 128388. 1 | FKTN         | XLOC_128249 | 278 coding   | noncoding | noncoding | noncoding |
| MSTRG. 128508. 1 |              | XLOC_128267 | 352 coding   | noncoding | noncoding | noncoding |
| MSTRG. 128519. 1 |              | XLOC_128274 | 216 coding   | noncoding | noncoding | noncoding |
| MSTRG. 128550. 1 |              | XLOC_128283 | 251 coding   | noncoding | noncoding | noncoding |
| MSTRG. 128553. 1 |              | XLOC_128285 | 291 coding   | noncoding | noncoding | noncoding |
| MSTRG. 128559. 1 |              | XLOC_128287 | 338 coding   | noncoding | noncoding | noncoding |
| MSTRG. 128416. 1 |              | XLOC_128295 | 272 coding   | noncoding | noncoding | noncoding |
| XM_006717215. 4  | ZNF462       | XLOC_128296 | 12385 coding | coding    | coding    | coding    |
| MSTRG. 128422. 1 |              | XLOC_128301 | 256 coding   | noncoding | noncoding | noncoding |
| NM_001244724. 1  | RAD23B       | XLOC_128306 | 3837 coding  | coding    | coding    | coding    |
| MSTRG. 128466. 1 | LINC01509    | XLOC_128318 | 730 coding   | noncoding | noncoding | noncoding |
| MSTRG. 128467. 1 | LINC01509    | XLOC_128319 | 253 coding   | noncoding | noncoding | noncoding |
| MSTRG. 128470. 1 |              | XLOC_128322 | 278 coding   | noncoding | noncoding | noncoding |
| MSTRG. 128480. 1 | LOC105376205 | XLOC_128326 | 282 coding   | noncoding | noncoding | noncoding |
| MSTRG. 128488. 1 |              | XLOC_128334 | 264 coding   | noncoding | noncoding | noncoding |
| MSTRG. 128757. 2 | TMEM245      | XLOC_128422 | 7667 coding  | coding    | coding    | noncoding |
| MSTRG. 128695. 1 |              | XLOC_128424 | 280 coding   | noncoding | noncoding | noncoding |
| MSTRG. 128725. 1 | PTPN3        | XLOC_128432 | 285 coding   | noncoding | noncoding | noncoding |
| MSTRG. 128769. 1 | PALM2-AKAP2  | XLOC_128436 | 314 coding   | noncoding | noncoding | noncoding |
| MSTRG. 128775. 1 | PALM2-AKAP2  | XLOC_128439 | 216 coding   | noncoding | noncoding | noncoding |

|                   |              |                   |              |           |           |           |
|-------------------|--------------|-------------------|--------------|-----------|-----------|-----------|
| MSTRG. 128800. 1  |              | XLOC_128459       | 262 coding   | noncoding | noncoding | noncoding |
| MSTRG. 128817. 1  | SVEP1        | XLOC_128465       | 235 coding   | noncoding | noncoding | noncoding |
| MSTRG. 128996. 1  |              | XLOC_128553       | 316 coding   | noncoding | noncoding | noncoding |
| MSTRG. 128936. 1  | UGCG         | XLOC_128562       | 269 coding   | noncoding | noncoding | noncoding |
| MSTRG. 128923. 1  |              | XLOC_128565       | 540 coding   | noncoding | noncoding | noncoding |
| MSTRG. 129014. 2  | PTBP3        | XLOC_128573       | 7114 coding  | coding    | coding    | noncoding |
| MSTRG. 128940. 1  |              | XLOC_128574       | 276 coding   | noncoding | noncoding | noncoding |
| MSTRG. 129072. 1  | HSDL2        | XLOC_128590       | 548 coding   | noncoding | noncoding | noncoding |
| MSTRG. 129087. 1  | KIAA1958     | XLOC_128605       | 231 coding   | noncoding | noncoding | noncoding |
| MSTRG. 129113. 3  | HDHD3        | XLOC_128639       | 1940 coding  | coding    | coding    | noncoding |
| NM_134427. 2      | RGS3         | XLOC_128644       | 1714 coding  | coding    | coding    | coding    |
| XM_017014251. 2   | ZNF618       | XLOC_128659       | 17483 coding | noncoding | coding    | coding    |
| MSTRG. 129176. 1  | ZNF618       | XLOC_128660       | 298 coding   | noncoding | noncoding | noncoding |
| MSTRG. 129324. 20 | AKNA         | XLOC_128673       | 1468 coding  | noncoding | coding    | noncoding |
| MSTRG. 129205. 1  | LOC105376229 | XLOC_128692       | 258 coding   | noncoding | noncoding | noncoding |
| XM_011518354. 1   | TMEM268      | XLOC_128696       | 4561 coding  | coding    | coding    | coding    |
| MSTRG. 129248. 1  | TMEM268      | XLOC_128698       | 250 coding   | noncoding | noncoding | noncoding |
| MSTRG. 129254. 1  | TMEM268      | XLOC_128701       | 307 coding   | noncoding | noncoding | noncoding |
| MSTRG. 129236. 1  |              | XLOC_128706       | 273 coding   | noncoding | noncoding | noncoding |
| MSTRG. 129319. 1  |              | 1-Dec XLOC_128728 | 299 coding   | noncoding | noncoding | noncoding |
| MSTRG. 129293. 1  |              | XLOC_128732       | 315 coding   | noncoding | noncoding | noncoding |
| MSTRG. 129322. 1  |              | XLOC_128738       | 225 coding   | noncoding | noncoding | noncoding |
| XR_930271. 2      | LOC105376236 | XLOC_128744       | 6837 coding  | noncoding | noncoding | coding    |
| MSTRG. 129375. 1  |              | XLOC_128748       | 284 coding   | coding    | noncoding | noncoding |
| XR_930276. 3      | LOC105376239 | XLOC_128810       | 7704 coding  | noncoding | noncoding | noncoding |
| MSTRG. 129384. 1  |              | XLOC_128827       | 366 coding   | noncoding | noncoding | noncoding |
| MSTRG. 129485. 1  | LOC105376244 | XLOC_128843       | 265 coding   | noncoding | noncoding | noncoding |
| MSTRG. 129420. 1  |              | XLOC_128860       | 382 coding   | noncoding | noncoding | noncoding |
| MSTRG. 129426. 1  |              | XLOC_128866       | 214 coding   | noncoding | noncoding | noncoding |
| MSTRG. 129452. 1  | BRINP1       | XLOC_128877       | 267 coding   | noncoding | noncoding | noncoding |
| MSTRG. 129504. 1  | LOC107987122 | XLOC_128885       | 221 coding   | noncoding | noncoding | noncoding |
| MSTRG. 129672. 1  |              | XLOC_128930       | 274 coding   | coding    | noncoding | noncoding |
| MSTRG. 129684. 3  | FBXW2        | XLOC_128937       | 5464 coding  | coding    | coding    | noncoding |
| NR_024408. 2      | CUTALP       | XLOC_128942       | 3765 coding  | noncoding | coding    | noncoding |
| XM_011518170. 2   | CNTRL        | XLOC_128959       | 7650 coding  | coding    | coding    | coding    |
| XM_006716940. 3   | CNTRL        | XLOC_128959       | 7641 coding  | coding    | coding    | coding    |
| XM_024447392. 1   | CNTRL        | XLOC_128959       | 6869 coding  | coding    | coding    | coding    |
| XM_011518593. 1   | GSN          | XLOC_128961       | 2781 coding  | coding    | coding    | coding    |
| XR_001746558. 2   | LOC102723324 | XLOC_128969       | 1376 coding  | noncoding | noncoding | noncoding |
| XM_017014298. 2   | DAB2IP       | XLOC_128978       | 8402 coding  | coding    | coding    | coding    |
| MSTRG. 129728. 1  | DAB2IP       | XLOC_128981       | 292 coding   | noncoding | noncoding | noncoding |
| MSTRG. 129733. 1  | DAB2IP       | XLOC_128985       | 289 coding   | noncoding | noncoding | noncoding |
| NM_000962. 4      | PTGS1        | XLOC_129026       | 5020 coding  | coding    | coding    | coding    |

|                |              |             |             |           |           |           |
|----------------|--------------|-------------|-------------|-----------|-----------|-----------|
| NM_001004457.2 | OR1N2        | XLOC_129033 | 1103 coding | coding    | coding    | coding    |
| MSTRG.129822.1 | OR1B1        | XLOC_129036 | 203 coding  | noncoding | noncoding | noncoding |
| NM_012197.4    | RABGAP1      | XLOC_129070 | 4986 coding | coding    | coding    | coding    |
| MSTRG.129917.1 | RABGAP1      | XLOC_129071 | 234 coding  | noncoding | noncoding | noncoding |
| MSTRG.129863.1 | LOC107987037 | XLOC_129104 | 238 coding  | noncoding | noncoding | noncoding |
| MSTRG.129864.1 | LOC107987037 | XLOC_129105 | 264 coding  | noncoding | noncoding | noncoding |
| MSTRG.129867.1 |              | XLOC_129108 | 280 coding  | noncoding | noncoding | noncoding |
| MSTRG.129876.1 |              | XLOC_129115 | 298 coding  | noncoding | noncoding | noncoding |
| XM_006717348.3 | ADGRD2       | XLOC_129129 | 3644 coding | coding    | coding    | coding    |
| MSTRG.130034.1 | OLFML2A      | XLOC_129153 | 218 coding  | noncoding | noncoding | noncoding |
| MSTRG.130030.1 |              | XLOC_129155 | 479 coding  | noncoding | noncoding | noncoding |
| MSTRG.130101.1 | ARPC5L       | XLOC_129159 | 281 coding  | noncoding | noncoding | noncoding |
| MSTRG.130118.1 | SCAI         | XLOC_129169 | 270 coding  | noncoding | noncoding | noncoding |
| MSTRG.130181.1 |              | XLOC_129240 | 239 coding  | noncoding | noncoding | noncoding |
| MSTRG.130263.1 |              | XLOC_129256 | 251 coding  | noncoding | noncoding | noncoding |
| MSTRG.130258.1 |              | XLOC_129264 | 468 coding  | noncoding | noncoding | noncoding |
| NM_014007.4    | ZBTB43       | XLOC_129268 | 5940 coding | coding    | coding    | coding    |
| XM_011518699.3 | ZBTB34       | XLOC_129271 | 6579 coding | coding    | coding    | coding    |
| NM_001322321.2 | RALGPS1      | XLOC_129273 | 6448 coding | coding    | coding    | coding    |
| XM_011519235.2 | RALGPS1      | XLOC_129273 | 8441 coding | coding    | coding    | coding    |
| MSTRG.130389.1 | RALGPS1      | XLOC_129278 | 230 coding  | noncoding | noncoding | noncoding |
| MSTRG.130429.1 | GARNL3       | XLOC_129297 | 241 coding  | noncoding | noncoding | noncoding |
| MSTRG.130430.1 | GARNL3       | XLOC_129298 | 262 coding  | noncoding | noncoding | noncoding |
| MSTRG.130360.1 |              | XLOC_129323 | 358 coding  | noncoding | noncoding | noncoding |
| NR_145961.1    | CFAP157      | XLOC_129327 | 1826 coding | noncoding | coding    | coding    |
| NM_001018078.2 | FPGS         | XLOC_129335 | 2327 coding | noncoding | coding    | coding    |
| MSTRG.130491.1 | ENG          | XLOC_129340 | 289 coding  | noncoding | noncoding | noncoding |
| MSTRG.130493.1 | ENG          | XLOC_129341 | 244 coding  | noncoding | noncoding | noncoding |
| MSTRG.130503.1 |              | XLOC_129348 | 283 coding  | noncoding | noncoding | noncoding |
| MSTRG.130523.1 | SLC25A25     | XLOC_129352 | 224 coding  | noncoding | noncoding | noncoding |
| MSTRG.130574.1 | TRUB2        | XLOC_129364 | 289 coding  | noncoding | noncoding | noncoding |
| MSTRG.130554.1 | CERCAM       | XLOC_129375 | 290 coding  | noncoding | noncoding | noncoding |
| MSTRG.130556.1 | CERCAM       | XLOC_129376 | 238 coding  | noncoding | noncoding | noncoding |
| NM_002540.5    | ODF2         | XLOC_129377 | 4041 coding | noncoding | coding    | coding    |
| MSTRG.130596.1 | LOC100506100 | XLOC_129396 | 395 coding  | noncoding | noncoding | noncoding |
| MSTRG.130597.2 | ZER1         | XLOC_129397 | 4281 coding | noncoding | coding    | coding    |
| MSTRG.130593.1 |              | XLOC_129399 | 260 coding  | noncoding | noncoding | noncoding |
| MSTRG.130626.1 | KYAT1        | XLOC_129402 | 302 coding  | coding    | noncoding | noncoding |
| MSTRG.130651.1 | MIGA2        | XLOC_129422 | 331 coding  | noncoding | noncoding | noncoding |
| MSTRG.130709.1 |              | XLOC_129456 | 243 coding  | noncoding | noncoding | noncoding |
| MSTRG.130710.1 |              | XLOC_129457 | 237 coding  | noncoding | noncoding | noncoding |
| MSTRG.130711.1 |              | XLOC_129458 | 212 coding  | noncoding | noncoding | noncoding |
| MSTRG.130714.1 |              | XLOC_129462 | 320 coding  | noncoding | noncoding | noncoding |

|                |              |             |              |           |           |           |
|----------------|--------------|-------------|--------------|-----------|-----------|-----------|
| NM_001286796.1 | NTMT1        | XLOC_129463 | 1688 coding  | coding    | coding    | coding    |
| MSTRG.130722.1 |              | XLOC_129467 | 246 coding   | noncoding | noncoding | noncoding |
| MSTRG.130738.1 | PTGES        | XLOC_129470 | 598 coding   | noncoding | noncoding | noncoding |
| MSTRG.130740.1 |              | XLOC_129471 | 256 coding   | noncoding | noncoding | noncoding |
| MSTRG.130741.1 |              | XLOC_129472 | 302 coding   | noncoding | noncoding | noncoding |
| XM_011518161.2 | USP20        | XLOC_129475 | 4682 coding  | coding    | coding    | coding    |
| MSTRG.130822.1 | FNBP1        | XLOC_129481 | 1473 coding  | noncoding | noncoding | noncoding |
| MSTRG.130745.1 |              | XLOC_129490 | 269 coding   | noncoding | noncoding | noncoding |
| MSTRG.130756.1 | NCS1         | XLOC_129492 | 278 coding   | noncoding | noncoding | noncoding |
| NM_001291815.2 | HMCN2        | XLOC_129499 | 15789 coding | coding    | noncoding | coding    |
| MSTRG.130778.1 |              | XLOC_129510 | 258 coding   | noncoding | noncoding | noncoding |
| MSTRG.130840.1 | ABL1         | XLOC_129515 | 333 coding   | noncoding | noncoding | noncoding |
| MSTRG.130872.1 |              | XLOC_129535 | 275 coding   | noncoding | noncoding | noncoding |
| MSTRG.130858.1 | LOC105376300 | XLOC_129543 | 308 coding   | noncoding | noncoding | noncoding |
| MSTRG.130861.1 |              | XLOC_129545 | 268 coding   | noncoding | noncoding | noncoding |
| MSTRG.130886.1 |              | XLOC_129549 | 245 coding   | noncoding | noncoding | noncoding |
| MSTRG.130947.2 | RAPGEF1      | XLOC_129558 | 1287 coding  | coding    | coding    | coding    |
| MSTRG.130901.1 |              | XLOC_129559 | 286 coding   | noncoding | noncoding | noncoding |
| MSTRG.130907.1 |              | XLOC_129566 | 249 coding   | coding    | noncoding | noncoding |
| XM_011519112.2 | NTNG2        | XLOC_129568 | 4097 coding  | coding    | coding    | coding    |
| NM_207417.3    | CFAP77       | XLOC_129574 | 1833 coding  | coding    | coding    | coding    |
| MSTRG.130935.1 | CFAP77       | XLOC_129576 | 215 coding   | noncoding | noncoding | noncoding |
| MSTRG.130936.1 | CFAP77       | XLOC_129577 | 401 coding   | noncoding | noncoding | noncoding |
| MSTRG.130938.1 | CFAP77       | XLOC_129578 | 286 coding   | noncoding | noncoding | noncoding |
| MSTRG.131046.1 | AK8          | XLOC_129617 | 286 coding   | noncoding | noncoding | noncoding |
| MSTRG.131054.1 | SPACA9       | XLOC_129624 | 298 coding   | noncoding | noncoding | noncoding |
| MSTRG.131042.1 | GTF3C5       | XLOC_129636 | 299 coding   | noncoding | noncoding | noncoding |
| MSTRG.131032.1 |              | XLOC_129639 | 267 coding   | noncoding | noncoding | noncoding |
| MSTRG.131076.1 | RALGDS       | XLOC_129644 | 3428 coding  | coding    | coding    | coding    |
| MSTRG.131066.1 |              | XLOC_129647 | 248 coding   | noncoding | noncoding | noncoding |
| MSTRG.131130.1 | VAV2         | XLOC_129684 | 261 coding   | noncoding | noncoding | noncoding |
| MSTRG.131154.1 | VAV2         | XLOC_129699 | 547 coding   | noncoding | coding    | noncoding |
| MSTRG.131118.1 |              | XLOC_129702 | 316 coding   | noncoding | noncoding | noncoding |
| NM_000093.4    | COL5A1       | XLOC_129733 | 8440 coding  | coding    | coding    | coding    |
| MSTRG.131242.1 |              | XLOC_129747 | 264 coding   | noncoding | noncoding | noncoding |
| MSTRG.131259.1 |              | XLOC_129757 | 236 coding   | noncoding | noncoding | noncoding |
| MSTRG.131261.1 | PPP1R26-AS1  | XLOC_129758 | 280 coding   | noncoding | noncoding | noncoding |
| XM_017015360.2 | PPP1R26      | XLOC_129759 | 5827 coding  | coding    | coding    | coding    |
| MSTRG.131285.1 | SOHLH1       | XLOC_129773 | 225 coding   | noncoding | noncoding | noncoding |
| XM_017014543.2 | PMPCA        | XLOC_129807 | 2081 coding  | coding    | coding    | coding    |
| MSTRG.131405.2 | NOTCH1       | XLOC_129812 | 9896 coding  | coding    | noncoding | coding    |
| MSTRG.131405.4 | NOTCH1       | XLOC_129812 | 979 coding   | noncoding | coding    | noncoding |
| MSTRG.131472.1 |              | XLOC_129858 | 218 coding   | noncoding | noncoding | noncoding |

|                  |              |             |              |           |           |           |
|------------------|--------------|-------------|--------------|-----------|-----------|-----------|
| MSTRG. 131487. 1 | ABCA2        | XLOC_129859 | 8317 coding  | coding    | noncoding | coding    |
| MSTRG. 131503. 1 | DPP7         | XLOC_129869 | 243 coding   | noncoding | noncoding | noncoding |
| XM_005266073. 4  | GRIN1        | XLOC_129872 | 4507 coding  | coding    | coding    | coding    |
| MSTRG. 131515. 2 | ANAPC2       | XLOC_129874 | 612 coding   | noncoding | coding    | noncoding |
| MSTRG. 131530. 1 | FAM166A      | XLOC_129885 | 249 coding   | noncoding | noncoding | noncoding |
| MSTRG. 131534. 1 | NELFB        | XLOC_129888 | 292 coding   | noncoding | noncoding | noncoding |
| MSTRG. 131550. 1 | NSMF         | XLOC_129895 | 2446 coding  | noncoding | coding    | noncoding |
| XM_006717322. 4  | ARRDC1       | XLOC_129903 | 2850 coding  | coding    | coding    | coding    |
| MSTRG. 131609. 1 | ARRDC1       | XLOC_129904 | 274 coding   | noncoding | noncoding | noncoding |
| XM_005266105. 5  | EHMT1        | XLOC_129906 | 5150 coding  | coding    | coding    | coding    |
| MSTRG. 131614. 1 | EHMT1        | XLOC_129907 | 274 coding   | noncoding | noncoding | noncoding |
| MSTRG. 131615. 1 | EHMT1        | XLOC_129908 | 256 coding   | noncoding | noncoding | noncoding |
| MSTRG. 131571. 1 |              | XLOC_129927 | 280 coding   | noncoding | noncoding | noncoding |
| NR_027156. 1     | TUBBP5       | XLOC_129929 | 2660 coding  | coding    | coding    | coding    |
| MSTRG. 131574. 1 | TUBBP5       | XLOC_129930 | 240 coding   | noncoding | noncoding | noncoding |
| MSTRG. 121276. 1 |              | XLOC_129943 | 401 coding   | noncoding | noncoding | noncoding |
| XR_001746591. 1  | LINC01388    | XLOC_129944 | 6241 coding  | noncoding | coding    | coding    |
| MSTRG. 121436. 1 | CBWD1        | XLOC_129948 | 340 coding   | noncoding | noncoding | noncoding |
| MSTRG. 121441. 1 |              | XLOC_129951 | 280 coding   | noncoding | noncoding | noncoding |
| MSTRG. 121477. 1 | KANK1        | XLOC_129977 | 265 coding   | noncoding | noncoding | noncoding |
| MSTRG. 121294. 1 | DMRT1        | XLOC_129984 | 289 coding   | noncoding | noncoding | noncoding |
| MSTRG. 121306. 1 | DMRT2        | XLOC_129987 | 274 coding   | noncoding | noncoding | noncoding |
| MSTRG. 121336. 1 | LOC105375951 | XLOC_130009 | 275 coding   | noncoding | noncoding | noncoding |
| MSTRG. 121550. 1 |              | XLOC_130094 | 339 coding   | noncoding | noncoding | noncoding |
| MSTRG. 121551. 1 |              | XLOC_130097 | 277 coding   | noncoding | noncoding | noncoding |
| XM_005251389. 5  | GLIS3        | XLOC_130099 | 3880 coding  | noncoding | coding    | coding    |
| XM_024447597. 1  | SPATA6L      | XLOC_130113 | 4382 coding  | coding    | coding    | coding    |
| MSTRG. 121780. 1 | PLGRKT       | XLOC_130148 | 298 coding   | noncoding | noncoding | noncoding |
| XR_929192. 3     | KIAA2026     | XLOC_130166 | 7150 coding  | noncoding | coding    | coding    |
| MSTRG. 121987. 1 | KIAA2026     | XLOC_130174 | 472 coding   | noncoding | noncoding | noncoding |
| MSTRG. 121794. 1 | LOC107987046 | XLOC_130187 | 219 coding   | coding    | noncoding | noncoding |
| MSTRG. 121806. 1 |              | XLOC_130199 | 263 coding   | noncoding | noncoding | noncoding |
| MSTRG. 121814. 1 |              | XLOC_130200 | 220 coding   | noncoding | noncoding | noncoding |
| MSTRG. 122080. 1 | KDM4C        | XLOC_130203 | 277 coding   | noncoding | noncoding | noncoding |
| MSTRG. 121880. 1 |              | XLOC_130229 | 273 coding   | noncoding | noncoding | noncoding |
| MSTRG. 121896. 1 |              | XLOC_130244 | 230 coding   | noncoding | noncoding | noncoding |
| MSTRG. 121902. 1 |              | XLOC_130245 | 404 coding   | noncoding | noncoding | noncoding |
| MSTRG. 121907. 1 |              | XLOC_130247 | 265 coding   | noncoding | noncoding | noncoding |
| XM_017014958. 2  | PTPRD        | XLOC_130249 | 10468 coding | coding    | coding    | coding    |
| MSTRG. 122227. 1 | PTPRD        | XLOC_130252 | 269 coding   | noncoding | noncoding | noncoding |
| MSTRG. 122253. 1 | PTPRD        | XLOC_130262 | 252 coding   | noncoding | noncoding | noncoding |
| MSTRG. 122004. 1 |              | XLOC_130297 | 202 coding   | coding    | noncoding | noncoding |
| MSTRG. 122010. 1 |              | XLOC_130299 | 268 coding   | noncoding | noncoding | noncoding |

|                |              |             |              |           |           |           |
|----------------|--------------|-------------|--------------|-----------|-----------|-----------|
| MSTRG.122014.1 |              | XLOC_130305 | 303 coding   | noncoding | noncoding | noncoding |
| MSTRG.122029.1 | LOC105375974 | XLOC_130315 | 294 coding   | noncoding | noncoding | noncoding |
| MSTRG.122033.1 |              | XLOC_130318 | 253 coding   | noncoding | noncoding | noncoding |
| MSTRG.122052.1 |              | XLOC_130330 | 410 coding   | noncoding | noncoding | noncoding |
| MSTRG.122065.1 | LURAP1L-AS1  | XLOC_130336 | 311 coding   | noncoding | noncoding | noncoding |
| MSTRG.122159.1 |              | XLOC_130352 | 298 coding   | noncoding | noncoding | noncoding |
| MSTRG.122161.1 |              | XLOC_130356 | 272 coding   | coding    | noncoding | noncoding |
| MSTRG.122177.1 | LOC101929507 | XLOC_130362 | 319 coding   | noncoding | noncoding | noncoding |
| NR_163239.1    | FREM1        | XLOC_130395 | 11258 coding | coding    | coding    | coding    |
| MSTRG.122367.1 | FREM1        | XLOC_130398 | 223 coding   | noncoding | noncoding | noncoding |
| MSTRG.122325.1 |              | XLOC_130400 | 206 coding   | noncoding | noncoding | noncoding |
| MSTRG.122328.1 |              | XLOC_130403 | 276 coding   | noncoding | noncoding | noncoding |
| MSTRG.122376.1 | TTC39B       | XLOC_130407 | 281 coding   | noncoding | noncoding | noncoding |
| MSTRG.122382.1 | TTC39B       | XLOC_130413 | 294 coding   | noncoding | noncoding | noncoding |
| MSTRG.122385.1 | TTC39B       | XLOC_130416 | 235 coding   | noncoding | noncoding | noncoding |
| MSTRG.122414.1 | CCDC171      | XLOC_130422 | 248 coding   | noncoding | noncoding | noncoding |
| MSTRG.122416.1 | CCDC171      | XLOC_130424 | 274 coding   | noncoding | noncoding | noncoding |
| MSTRG.122419.1 | CCDC171      | XLOC_130426 | 245 coding   | noncoding | noncoding | noncoding |
| MSTRG.122420.1 | CCDC171      | XLOC_130427 | 215 coding   | noncoding | noncoding | noncoding |
| MSTRG.122421.1 | CCDC171      | XLOC_130428 | 311 coding   | noncoding | noncoding | noncoding |
| MSTRG.122522.1 | BNC2         | XLOC_130473 | 297 coding   | noncoding | noncoding | noncoding |
| MSTRG.122460.1 |              | XLOC_130476 | 242 coding   | noncoding | noncoding | noncoding |
| MSTRG.122462.1 |              | XLOC_130477 | 312 coding   | noncoding | noncoding | noncoding |
| MSTRG.122464.1 |              | XLOC_130478 | 230 coding   | noncoding | noncoding | noncoding |
| MSTRG.122469.1 |              | XLOC_130481 | 241 coding   | noncoding | noncoding | noncoding |
| MSTRG.122577.1 | CNTLN        | XLOC_130494 | 298 coding   | noncoding | noncoding | noncoding |
| MSTRG.122553.1 | ADAMTSL1     | XLOC_130517 | 261 coding   | noncoding | noncoding | noncoding |
| MSTRG.122650.1 | SLC24A2      | XLOC_130549 | 314 coding   | noncoding | noncoding | noncoding |
| MSTRG.122729.1 | LOC107987053 | XLOC_130628 | 233 coding   | noncoding | noncoding | noncoding |
| MSTRG.122813.1 |              | XLOC_130697 | 295 coding   | noncoding | noncoding | noncoding |
| MSTRG.122827.1 |              | XLOC_130701 | 382 coding   | coding    | noncoding | noncoding |
| MSTRG.122845.1 | LINC01239    | XLOC_130708 | 322 coding   | coding    | noncoding | noncoding |
| MSTRG.122831.1 |              | XLOC_130712 | 261 coding   | coding    | noncoding | noncoding |
| MSTRG.122902.1 | LOC105375993 | XLOC_130724 | 274 coding   | noncoding | noncoding | noncoding |
| MSTRG.122933.1 |              | XLOC_130740 | 239 coding   | noncoding | noncoding | noncoding |
| MSTRG.123000.1 | LOC105375999 | XLOC_130777 | 257 coding   | noncoding | noncoding | noncoding |
| XR_001746638.1 | LOC105376000 | XLOC_130784 | 6424 coding  | noncoding | coding    | noncoding |
| MSTRG.123022.1 | CAAP1        | XLOC_130792 | 201 coding   | coding    | noncoding | noncoding |
| MSTRG.123041.1 | EQTN         | XLOC_130813 | 336 coding   | noncoding | noncoding | noncoding |
| MSTRG.123072.1 |              | XLOC_130841 | 316 coding   | noncoding | noncoding | noncoding |
| MSTRG.123091.1 |              | XLOC_130843 | 261 coding   | noncoding | noncoding | noncoding |
| MSTRG.123089.1 |              | XLOC_130852 | 505 coding   | noncoding | noncoding | noncoding |
| MSTRG.124128.1 | LINGO2       | XLOC_130870 | 319 coding   | noncoding | noncoding | noncoding |

|                   |              |             |             |           |           |           |
|-------------------|--------------|-------------|-------------|-----------|-----------|-----------|
| MSTRG. 124212. 1  | LINGO2       | XLOC_130884 | 772 coding  | noncoding | noncoding | noncoding |
| MSTRG. 123158. 1  |              | XLOC_130920 | 267 coding  | noncoding | noncoding | noncoding |
| MSTRG. 123168. 1  |              | XLOC_130924 | 250 coding  | noncoding | noncoding | noncoding |
| MSTRG. 123195. 1  |              | XLOC_130938 | 206 coding  | noncoding | noncoding | noncoding |
| MSTRG. 123248. 1  | LOC105376011 | XLOC_130960 | 252 coding  | noncoding | noncoding | noncoding |
| MSTRG. 123237. 1  |              | XLOC_130961 | 214 coding  | noncoding | noncoding | noncoding |
| MSTRG. 123239. 1  |              | XLOC_130962 | 215 coding  | noncoding | noncoding | noncoding |
| MSTRG. 123250. 1  |              | XLOC_130965 | 237 coding  | noncoding | noncoding | noncoding |
| MSTRG. 123269. 1  | LOC105376017 | XLOC_130983 | 280 coding  | noncoding | noncoding | noncoding |
| MSTRG. 123276. 1  |              | XLOC_131006 | 302 coding  | noncoding | noncoding | noncoding |
| MSTRG. 123304. 1  |              | XLOC_131016 | 259 coding  | noncoding | noncoding | noncoding |
| MSTRG. 123426. 1  | TRBV20OR9-2  | XLOC_131034 | 266 coding  | noncoding | noncoding | noncoding |
| MSTRG. 123447. 1  | TRBV20OR9-2  | XLOC_131046 | 264 coding  | noncoding | noncoding | noncoding |
| MSTRG. 123450. 5  | UBE2R2       | XLOC_131047 | 3898 coding | coding    | noncoding | noncoding |
| MSTRG. 123450. 11 | UBAP2        | XLOC_131047 | 9840 coding | coding    | coding    | coding    |
| NM_001370064. 1   | UBAP2        | XLOC_131047 | 4154 coding | coding    | coding    | coding    |
| MSTRG. 123388. 1  |              | XLOC_131049 | 231 coding  | noncoding | noncoding | noncoding |
| MSTRG. 123389. 1  |              | XLOC_131051 | 231 coding  | noncoding | noncoding | noncoding |
| NM_020702. 5      | MYORG        | XLOC_131056 | 6447 coding | coding    | coding    | coding    |
| MSTRG. 123410. 1  | DNAI1        | XLOC_131066 | 230 coding  | noncoding | noncoding | noncoding |
| NM_198573. 3      | ENHO         | XLOC_131068 | 1028 coding | noncoding | coding    | noncoding |
| XM_017014283. 1   | ARID3C       | XLOC_131075 | 4423 coding | coding    | coding    | coding    |
| MSTRG. 123496. 3  | GALT         | XLOC_131077 | 719 coding  | coding    | coding    | noncoding |
| NR_135148. 2      | LOC730098    | XLOC_131083 | 1347 coding | noncoding | coding    | noncoding |
| MSTRG. 123558. 1  |              | XLOC_131112 | 314 coding  | noncoding | noncoding | noncoding |
| MSTRG. 123569. 1  | ATP8B5P      | XLOC_131126 | 260 coding  | noncoding | noncoding | noncoding |
| MSTRG. 123633. 1  |              | XLOC_131148 | 273 coding  | noncoding | noncoding | noncoding |
| NM_006289. 4      | TLN1         | XLOC_131153 | 8623 coding | coding    | noncoding | coding    |
| MSTRG. 123712. 1  |              | XLOC_131166 | 255 coding  | noncoding | noncoding | noncoding |
| MSTRG. 123757. 1  | LOC102724322 | XLOC_131210 | 252 coding  | noncoding | noncoding | noncoding |
| MSTRG. 123772. 1  |              | XLOC_131225 | 277 coding  | noncoding | noncoding | noncoding |
| MSTRG. 123768. 1  |              | XLOC_131226 | 284 coding  | noncoding | noncoding | noncoding |
| NR_104000. 1      | PAX5         | XLOC_131235 | 8836 coding | coding    | coding    | coding    |
| MSTRG. 123793. 1  | PAX5         | XLOC_131236 | 309 coding  | noncoding | noncoding | noncoding |
| MSTRG. 123797. 1  | PAX5         | XLOC_131240 | 263 coding  | noncoding | noncoding | noncoding |
| XM_017014619. 2   | FBXO10       | XLOC_131269 | 4892 coding | coding    | coding    | coding    |
| XR_929230. 2      | FBXO10       | XLOC_131269 | 2517 coding | coding    | coding    | coding    |
| MSTRG. 123839. 1  | FBXO10       | XLOC_131270 | 249 coding  | noncoding | noncoding | noncoding |
| MSTRG. 123959. 1  | SLC25A51     | XLOC_131289 | 280 coding  | noncoding | noncoding | noncoding |
| NM_003028. 3      | SHB          | XLOC_131292 | 6035 coding | coding    | coding    | coding    |
| MSTRG. 123916. 1  |              | XLOC_131298 | 405 coding  | noncoding | noncoding | noncoding |
| MSTRG. 123968. 1  | LOC107987064 | XLOC_131303 | 226 coding  | noncoding | noncoding | noncoding |
| MSTRG. 123961. 1  |              | XLOC_131304 | 274 coding  | noncoding | noncoding | noncoding |

|                 |              |             |             |           |           |           |
|-----------------|--------------|-------------|-------------|-----------|-----------|-----------|
| NM_001007563.3  | IGFBPL1      | XLOC_131309 | 3566 coding | coding    | coding    | coding    |
| MSTRG.124001.1  | ANKRD18A     | XLOC_131313 | 333 coding  | noncoding | noncoding | noncoding |
| MSTRG.123991.1  |              | XLOC_131317 | 284 coding  | noncoding | noncoding | noncoding |
| MSTRG.124012.1  | LOC101927042 | XLOC_131321 | 305 coding  | noncoding | noncoding | noncoding |
| MSTRG.124446.1  | LOC105376050 | XLOC_131371 | 257 coding  | noncoding | noncoding | noncoding |
| MSTRG.124491.1  |              | XLOC_131395 | 263 coding  | noncoding | noncoding | noncoding |
| NR_147037.1     | LOC440896    | XLOC_131407 | 4387 coding | coding    | noncoding | noncoding |
| MSTRG.124575.1  |              | XLOC_131456 | 653 coding  | coding    | noncoding | noncoding |
| NM_001201380.2  | CNTNAP3B     | XLOC_131467 | 6379 coding | coding    | coding    | coding    |
| MSTRG.124606.1  | CNTNAP3B     | XLOC_131469 | 210 coding  | noncoding | noncoding | noncoding |
| MSTRG.124692.1  |              | XLOC_131508 | 235 coding  | noncoding | noncoding | noncoding |
| MSTRG.124749.1  |              | XLOC_131547 | 409 coding  | noncoding | noncoding | noncoding |
| MSTRG.124753.1  |              | XLOC_131548 | 280 coding  | noncoding | noncoding | noncoding |
| MSTRG.124829.1  | LINC01189    | XLOC_131567 | 231 coding  | noncoding | noncoding | noncoding |
| MSTRG.124863.1  | LOC403323    | XLOC_131587 | 299 coding  | noncoding | noncoding | noncoding |
| NM_001126334.1  | FOXD4L5      | XLOC_131645 | 3109 coding | coding    | coding    | coding    |
| MSTRG.125031.1  |              | XLOC_131657 | 496 coding  | noncoding | noncoding | noncoding |
| MSTRG.125005.1  |              | XLOC_131703 | 382 coding  | noncoding | noncoding | noncoding |
| NM_001083124.1  | SPATA31A3    | XLOC_131704 | 4223 coding | coding    | coding    | coding    |
| MSTRG.125059.1  |              | XLOC_131719 | 259 coding  | noncoding | noncoding | noncoding |
| MSTRG.125093.10 | CBWD3        | XLOC_131732 | 881 coding  | coding    | noncoding | noncoding |
| MSTRG.125204.1  |              | XLOC_131785 | 302 coding  | noncoding | noncoding | noncoding |
| MSTRG.125180.1  | APBA1        | XLOC_131795 | 304 coding  | noncoding | noncoding | noncoding |
| MSTRG.125191.1  | APBA1        | XLOC_131797 | 245 coding  | coding    | noncoding | noncoding |
| MSTRG.125249.1  |              | XLOC_131815 | 272 coding  | noncoding | noncoding | noncoding |
| MSTRG.125305.1  | MAMDC2       | XLOC_131822 | 258 coding  | noncoding | noncoding | noncoding |
| MSTRG.125318.7  | SMC5         | XLOC_131828 | 1486 coding | noncoding | noncoding | noncoding |
| MSTRG.125340.1  | LOC101927086 | XLOC_131838 | 474 coding  | noncoding | noncoding | noncoding |
| MSTRG.125344.1  | TRPM3        | XLOC_131840 | 228 coding  | noncoding | noncoding | noncoding |
| MSTRG.125347.1  | LOC105376078 | XLOC_131841 | 325 coding  | noncoding | noncoding | noncoding |
| MSTRG.125286.1  |              | XLOC_131861 | 261 coding  | noncoding | noncoding | noncoding |
| MSTRG.125290.1  |              | XLOC_131862 | 250 coding  | noncoding | noncoding | noncoding |
| MSTRG.125382.1  |              | XLOC_131879 | 256 coding  | noncoding | noncoding | noncoding |
| MSTRG.125460.1  |              | XLOC_131884 | 224 coding  | noncoding | noncoding | noncoding |
| MSTRG.125420.1  | LOC101927108 | XLOC_131897 | 227 coding  | noncoding | noncoding | noncoding |
| MSTRG.125423.1  |              | XLOC_131902 | 240 coding  | noncoding | noncoding | noncoding |
| MSTRG.125574.1  |              | XLOC_131973 | 287 coding  | noncoding | noncoding | noncoding |
| MSTRG.125595.1  | LOC101927329 | XLOC_131980 | 262 coding  | noncoding | noncoding | noncoding |
| MSTRG.125610.1  | RORB         | XLOC_131992 | 307 coding  | noncoding | noncoding | noncoding |
| MSTRG.125619.1  | RORB         | XLOC_131998 | 254 coding  | noncoding | noncoding | noncoding |
| NM_001177311.1  | TRPM6        | XLOC_131999 | 8271 coding | coding    | coding    | coding    |
| MSTRG.125635.1  | TRPM6        | XLOC_132008 | 658 coding  | coding    | noncoding | noncoding |
| MSTRG.125621.1  |              | XLOC_132013 | 298 coding  | noncoding | noncoding | noncoding |

|                |              |             |             |           |           |           |
|----------------|--------------|-------------|-------------|-----------|-----------|-----------|
| MSTRG.125670.1 |              | XLOC_132052 | 263 coding  | noncoding | noncoding | noncoding |
| MSTRG.125700.1 |              | XLOC_132079 | 302 coding  | noncoding | noncoding | noncoding |
| MSTRG.125710.1 |              | XLOC_132082 | 284 coding  | noncoding | noncoding | noncoding |
| MSTRG.125708.1 |              | XLOC_132083 | 244 coding  | noncoding | noncoding | noncoding |
| MSTRG.125748.1 |              | XLOC_132105 | 273 coding  | noncoding | noncoding | noncoding |
| MSTRG.125755.1 |              | XLOC_132108 | 252 coding  | noncoding | noncoding | noncoding |
| MSTRG.125756.1 |              | XLOC_132109 | 270 coding  | noncoding | noncoding | noncoding |
| MSTRG.125808.1 | PRUNE2       | XLOC_132128 | 505 coding  | noncoding | noncoding | noncoding |
| MSTRG.125760.1 |              | XLOC_132133 | 309 coding  | noncoding | noncoding | noncoding |
| MSTRG.125765.1 |              | XLOC_132135 | 271 coding  | noncoding | noncoding | noncoding |
| MSTRG.125910.1 | GNA14        | XLOC_132150 | 248 coding  | noncoding | noncoding | noncoding |
| MSTRG.126122.1 | GNAQ         | XLOC_132212 | 333 coding  | noncoding | noncoding | noncoding |
| MSTRG.125877.1 |              | XLOC_132253 | 258 coding  | noncoding | noncoding | noncoding |
| MSTRG.125952.1 |              | XLOC_132275 | 301 coding  | noncoding | noncoding | noncoding |
| MSTRG.126174.1 | LINC01507    | XLOC_132363 | 236 coding  | noncoding | noncoding | noncoding |
| MSTRG.126316.1 |              | XLOC_132470 | 299 coding  | noncoding | noncoding | noncoding |
| MSTRG.126342.1 | LOC101927502 | XLOC_132489 | 240 coding  | noncoding | noncoding | noncoding |
| MSTRG.126348.1 | LOC105376108 | XLOC_132493 | 296 coding  | noncoding | noncoding | noncoding |
| MSTRG.126350.1 | LOC105376108 | XLOC_132494 | 297 coding  | noncoding | noncoding | noncoding |
| NM_001244960.1 | FRMD3        | XLOC_132509 | 5068 coding | coding    | coding    | coding    |
| MSTRG.126508.1 | HNRNPK       | XLOC_132546 | 737 coding  | noncoding | noncoding | noncoding |
| MSTRG.126475.1 |              | XLOC_132552 | 301 coding  | noncoding | noncoding | noncoding |
| MSTRG.126515.1 | LOC102724036 | XLOC_132559 | 280 coding  | coding    | noncoding | noncoding |
| MSTRG.126520.1 | LOC102724036 | XLOC_132562 | 266 coding  | noncoding | noncoding | noncoding |
| MSTRG.126539.1 |              | XLOC_132581 | 312 coding  | noncoding | noncoding | noncoding |
| MSTRG.126628.1 |              | XLOC_132625 | 239 coding  | noncoding | noncoding | noncoding |
| MSTRG.126631.1 |              | XLOC_132627 | 277 coding  | noncoding | noncoding | noncoding |
| MSTRG.126637.1 |              | XLOC_132630 | 228 coding  | noncoding | noncoding | noncoding |
| MSTRG.126677.1 | LOC102724080 | XLOC_132648 | 436 coding  | noncoding | noncoding | noncoding |
| MSTRG.126690.1 |              | XLOC_132656 | 237 coding  | noncoding | noncoding | noncoding |
| MSTRG.126699.1 |              | XLOC_132663 | 246 coding  | noncoding | noncoding | noncoding |
| MSTRG.126700.1 |              | XLOC_132664 | 259 coding  | noncoding | noncoding | noncoding |
| MSTRG.126749.1 |              | XLOC_132692 | 311 coding  | noncoding | noncoding | noncoding |
| MSTRG.126803.1 | SPATA31C2    | XLOC_132711 | 314 coding  | noncoding | noncoding | noncoding |
| MSTRG.126805.1 |              | XLOC_132712 | 259 coding  | noncoding | noncoding | noncoding |
| MSTRG.126807.1 |              | XLOC_132715 | 293 coding  | noncoding | noncoding | noncoding |
| MSTRG.126810.1 |              | XLOC_132716 | 324 coding  | noncoding | noncoding | noncoding |
| MSTRG.126885.1 |              | XLOC_132741 | 269 coding  | noncoding | noncoding | noncoding |
| MSTRG.126901.1 |              | XLOC_132762 | 381 coding  | noncoding | noncoding | noncoding |
| MSTRG.126930.1 |              | XLOC_132779 | 259 coding  | noncoding | noncoding | noncoding |
| MSTRG.127026.1 | ROR2         | XLOC_132846 | 275 coding  | noncoding | noncoding | noncoding |
| MSTRG.127020.1 |              | XLOC_132852 | 405 coding  | noncoding | noncoding | noncoding |
| MSTRG.127059.1 |              | XLOC_132853 | 310 coding  | noncoding | noncoding | noncoding |

|                |                 |             |             |           |           |           |
|----------------|-----------------|-------------|-------------|-----------|-----------|-----------|
| MSTRG.127064.1 | SPTLC1          | XLOC_132857 | 220 coding  | noncoding | noncoding | noncoding |
| MSTRG.127067.1 | SPTLC1          | XLOC_132860 | 792 coding  | coding    | coding    | noncoding |
| MSTRG.127232.1 | LOC107987095    | XLOC_132922 | 295 coding  | noncoding | noncoding | noncoding |
| NM_001354537.1 | ZNF484          | XLOC_132932 | 4841 coding | coding    | coding    | coding    |
| NM_001007101.3 | ZNF484          | XLOC_132932 | 4726 coding | coding    | coding    | coding    |
| MSTRG.127159.1 | ZNF484          | XLOC_132933 | 284 coding  | noncoding | noncoding | noncoding |
| MSTRG.127235.1 |                 | XLOC_132952 | 241 coding  | noncoding | noncoding | noncoding |
| NM_001368813.1 | C9orf129        | XLOC_132956 | 6504 coding | noncoding | coding    | coding    |
| MSTRG.127295.1 |                 | XLOC_132971 | 320 coding  | noncoding | noncoding | noncoding |
| MSTRG.127370.1 |                 | XLOC_133025 | 318 coding  | noncoding | noncoding | noncoding |
| MSTRG.127707.3 | AOPEP           | XLOC_133031 | 418 coding  | noncoding | noncoding | noncoding |
| MSTRG.127439.1 |                 | XLOC_133081 | 279 coding  | noncoding | noncoding | noncoding |
| MSTRG.127448.1 | LOC105376156    | XLOC_133084 | 241 coding  | noncoding | noncoding | noncoding |
| MSTRG.127452.1 | LOC105376157    | XLOC_133091 | 290 coding  | noncoding | noncoding | noncoding |
| MSTRG.127557.5 | LINC00476       | XLOC_133098 | 2139 coding | coding    | coding    | noncoding |
| MSTRG.127518.1 | HSD17B3         | XLOC_133119 | 222 coding  | noncoding | noncoding | noncoding |
| MSTRG.127506.1 |                 | XLOC_133125 | 299 coding  | noncoding | noncoding | noncoding |
| MSTRG.127545.1 | CDC14B          | XLOC_133131 | 243 coding  | noncoding | noncoding | noncoding |
| XM_011518393.2 | ZNF510          | XLOC_133144 | 6994 coding | coding    | coding    | coding    |
| MSTRG.127654.1 |                 | XLOC_133145 | 291 coding  | noncoding | noncoding | noncoding |
| MSTRG.127689.1 | NUTM2G          | XLOC_133163 | 271 coding  | coding    | coding    | noncoding |
| NM_001333.4    | CTSV            | XLOC_133169 | 4359 coding | coding    | coding    | coding    |
| MSTRG.127583.1 |                 | XLOC_133172 | 552 coding  | noncoding | noncoding | noncoding |
| MSTRG.127603.1 | ANKRD18CP       | XLOC_133179 | 252 coding  | noncoding | noncoding | noncoding |
| MSTRG.127622.1 | SUGT1P4-STRA6LP | XLOC_133188 | 256 coding  | noncoding | noncoding | noncoding |
| MSTRG.127790.1 | PTCSC2          | XLOC_133223 | 232 coding  | noncoding | noncoding | noncoding |
| XM_005252050.4 | TRMO            | XLOC_133232 | 4374 coding | coding    | coding    | coding    |
| MSTRG.127832.1 |                 | XLOC_133237 | 228 coding  | noncoding | noncoding | noncoding |
| NM_005458.8    | GABBR2          | XLOC_133252 | 5499 coding | coding    | coding    | coding    |
| MSTRG.127924.2 | TGFBR1          | XLOC_133270 | 7393 coding | coding    | noncoding | noncoding |
| MSTRG.127972.1 | LOC101928438    | XLOC_133294 | 230 coding  | noncoding | noncoding | noncoding |
| MSTRG.127981.1 |                 | XLOC_133302 | 267 coding  | noncoding | noncoding | noncoding |
| MSTRG.127992.1 |                 | XLOC_133310 | 477 coding  | noncoding | noncoding | noncoding |
| MSTRG.127998.1 |                 | XLOC_133325 | 269 coding  | noncoding | noncoding | noncoding |
| MSTRG.128020.1 | LOC105376179    | XLOC_133326 | 309 coding  | noncoding | noncoding | noncoding |
| MSTRG.128031.1 | MRPL50          | XLOC_133334 | 252 coding  | noncoding | noncoding | noncoding |
| MSTRG.128134.1 | GRIN3A          | XLOC_133354 | 295 coding  | noncoding | noncoding | noncoding |
| MSTRG.128050.1 |                 | XLOC_133367 | 295 coding  | noncoding | noncoding | noncoding |
| MSTRG.128052.1 |                 | XLOC_133368 | 261 coding  | noncoding | noncoding | noncoding |
| MSTRG.128053.1 |                 | XLOC_133369 | 296 coding  | noncoding | noncoding | noncoding |
| MSTRG.128064.1 |                 | XLOC_133377 | 313 coding  | noncoding | noncoding | noncoding |
| MSTRG.128067.1 |                 | XLOC_133379 | 311 coding  | noncoding | noncoding | noncoding |
| MSTRG.128098.1 |                 | XLOC_133397 | 278 coding  | noncoding | noncoding | noncoding |

|                |              |             |              |           |           |           |
|----------------|--------------|-------------|--------------|-----------|-----------|-----------|
| MSTRG.128167.1 |              | XLOC_133412 | 285 coding   | coding    | noncoding | noncoding |
| MSTRG.128182.1 |              | XLOC_133421 | 318 coding   | noncoding | noncoding | noncoding |
| NM_001004481.1 | OR13C2       | XLOC_133424 | 957 coding   | coding    | coding    | coding    |
| NM_001001956.1 | OR13C9       | XLOC_133425 | 957 coding   | coding    | coding    | coding    |
| MSTRG.128186.1 |              | XLOC_133426 | 261 coding   | noncoding | noncoding | noncoding |
| MSTRG.128306.1 | LOC107987105 | XLOC_133429 | 221 coding   | coding    | noncoding | noncoding |
| MSTRG.128315.1 | LOC107987105 | XLOC_133432 | 291 coding   | noncoding | noncoding | noncoding |
| XM_011518342.3 | ABCA1        | XLOC_133435 | 10190 coding | coding    | coding    | coding    |
| MSTRG.128335.1 | ABCA1        | XLOC_133443 | 259 coding   | noncoding | noncoding | noncoding |
| MSTRG.128252.1 | LOC105376197 | XLOC_133456 | 277 coding   | noncoding | noncoding | noncoding |
| MSTRG.128395.1 | TAL2         | XLOC_133490 | 246 coding   | coding    | noncoding | noncoding |
| MSTRG.128415.1 |              | XLOC_133559 | 289 coding   | noncoding | noncoding | noncoding |
| MSTRG.128433.1 | ZNF462       | XLOC_133564 | 224 coding   | coding    | noncoding | noncoding |
| MSTRG.128448.1 |              | XLOC_133587 | 309 coding   | noncoding | noncoding | noncoding |
| MSTRG.128481.1 | LOC105376205 | XLOC_133594 | 282 coding   | noncoding | noncoding | noncoding |
| MSTRG.128498.1 | LOC105376208 | XLOC_133606 | 263 coding   | noncoding | noncoding | noncoding |
| MSTRG.128753.1 | CTNNAL1      | XLOC_133661 | 436 coding   | coding    | noncoding | noncoding |
| XM_011518452.2 | TMEM245      | XLOC_133664 | 7747 coding  | coding    | coding    | coding    |
| NM_014334.3    | FRRS1L       | XLOC_133672 | 8197 coding  | coding    | coding    | coding    |
| MSTRG.128702.1 | EPB41L4B     | XLOC_133675 | 234 coding   | noncoding | noncoding | noncoding |
| MSTRG.128703.1 | EPB41L4B     | XLOC_133676 | 233 coding   | noncoding | noncoding | noncoding |
| MSTRG.128698.1 |              | XLOC_133682 | 222 coding   | noncoding | noncoding | noncoding |
| MSTRG.128699.1 |              | XLOC_133683 | 273 coding   | noncoding | noncoding | noncoding |
| MSTRG.128726.1 | PTPN3        | XLOC_133688 | 285 coding   | noncoding | noncoding | noncoding |
| MSTRG.128715.1 |              | XLOC_133692 | 240 coding   | noncoding | noncoding | noncoding |
| MSTRG.128774.1 | PALM2-AKAP2  | XLOC_133698 | 216 coding   | noncoding | noncoding | noncoding |
| MSTRG.128779.1 | PALM2-AKAP2  | XLOC_133700 | 237 coding   | coding    | noncoding | noncoding |
| MSTRG.128819.1 | SVEP1        | XLOC_133727 | 270 coding   | noncoding | noncoding | noncoding |
| MSTRG.128820.1 | SVEP1        | XLOC_133728 | 233 coding   | noncoding | noncoding | noncoding |
| MSTRG.128795.1 |              | XLOC_133732 | 270 coding   | noncoding | noncoding | noncoding |
| MSTRG.128898.1 | ECPAS        | XLOC_133759 | 246 coding   | noncoding | noncoding | noncoding |
| MSTRG.128908.1 | ECPAS        | XLOC_133769 | 257 coding   | noncoding | noncoding | noncoding |
| MSTRG.128893.1 | PTGR1        | XLOC_133780 | 298 coding   | noncoding | noncoding | noncoding |
| MSTRG.129013.1 | SUSD1        | XLOC_133822 | 204 coding   | noncoding | noncoding | noncoding |
| MSTRG.128939.1 |              | XLOC_133828 | 314 coding   | noncoding | noncoding | noncoding |
| MSTRG.129025.1 | INIP         | XLOC_133842 | 244 coding   | noncoding | noncoding | noncoding |
| MSTRG.129026.1 | INIP         | XLOC_133843 | 226 coding   | noncoding | noncoding | noncoding |
| MSTRG.129054.1 |              | XLOC_133858 | 205 coding   | noncoding | noncoding | noncoding |
| MSTRG.129109.2 | PRPF4        | XLOC_133865 | 385 coding   | noncoding | noncoding | noncoding |
| MSTRG.129149.1 |              | XLOC_133890 | 251 coding   | coding    | noncoding | noncoding |
| MSTRG.129200.1 | LOC105376224 | XLOC_133919 | 303 coding   | noncoding | noncoding | noncoding |
| XR_929844.3    | AKNA         | XLOC_133921 | 5812 coding  | coding    | coding    | coding    |
| XM_011518491.3 | WHRN         | XLOC_133936 | 4126 coding  | coding    | coding    | coding    |

|                  |              |                   |              |           |           |           |
|------------------|--------------|-------------------|--------------|-----------|-----------|-----------|
| MSTRG. 129235. 1 |              | XLOC_133953       | 403 coding   | noncoding | noncoding | noncoding |
| MSTRG. 129304. 1 |              | 1-Dec XLOC_133998 | 278 coding   | noncoding | noncoding | noncoding |
| MSTRG. 129360. 1 |              | XLOC_134016       | 254 coding   | noncoding | noncoding | noncoding |
| MSTRG. 129570. 1 | ASTN2-AS1    | XLOC_134037       | 233 coding   | coding    | noncoding | noncoding |
| MSTRG. 129598. 1 | LOC105376240 | XLOC_134044       | 300 coding   | noncoding | noncoding | noncoding |
| MSTRG. 129619. 1 | ASTN2        | XLOC_134055       | 313 coding   | noncoding | noncoding | noncoding |
| MSTRG. 129640. 1 | ASTN2        | XLOC_134065       | 284 coding   | noncoding | noncoding | noncoding |
| MSTRG. 129385. 1 |              | XLOC_134068       | 366 coding   | noncoding | noncoding | noncoding |
| MSTRG. 129388. 1 |              | XLOC_134070       | 259 coding   | coding    | noncoding | noncoding |
| MSTRG. 129472. 1 | TLR4         | XLOC_134071       | 26225 coding | coding    | coding    | noncoding |
| MSTRG. 129472. 2 | TLR4         | XLOC_134071       | 39778 coding | coding    | coding    | noncoding |
| MSTRG. 129419. 1 |              | XLOC_134100       | 325 coding   | noncoding | noncoding | noncoding |
| MSTRG. 129442. 1 |              | XLOC_134113       | 224 coding   | noncoding | noncoding | noncoding |
| MSTRG. 129450. 1 | BRINP1       | XLOC_134117       | 254 coding   | noncoding | noncoding | noncoding |
| MSTRG. 129453. 1 | BRINP1       | XLOC_134118       | 267 coding   | noncoding | noncoding | noncoding |
| MSTRG. 129458. 1 | LOC105376250 | XLOC_134121       | 307 coding   | noncoding | noncoding | noncoding |
| MSTRG. 129459. 1 | LOC105376250 | XLOC_134122       | 237 coding   | noncoding | noncoding | noncoding |
| MSTRG. 129702. 1 | CDK5RAP2     | XLOC_134152       | 244 coding   | noncoding | noncoding | noncoding |
| MSTRG. 129703. 1 | CDK5RAP2     | XLOC_134153       | 295 coding   | noncoding | noncoding | noncoding |
| MSTRG. 129692. 1 | MEGF9        | XLOC_134162       | 4922 coding  | coding    | coding    | coding    |
| MSTRG. 130010. 6 | LOC102723324 | XLOC_134200       | 409 coding   | noncoding | noncoding | noncoding |
| MSTRG. 129727. 1 | DAB2IP       | XLOC_134215       | 367 coding   | noncoding | noncoding | noncoding |
| MSTRG. 129732. 1 | DAB2IP       | XLOC_134216       | 276 coding   | noncoding | noncoding | noncoding |
| MSTRG. 129770. 1 | TTLL11       | XLOC_134228       | 288 coding   | noncoding | noncoding | noncoding |
| MSTRG. 129777. 1 | TTLL11       | XLOC_134230       | 312 coding   | noncoding | noncoding | noncoding |
| MSTRG. 129786. 1 | TTLL11       | XLOC_134231       | 260 coding   | noncoding | noncoding | noncoding |
| MSTRG. 129743. 1 | NDUFA8       | XLOC_134235       | 283 coding   | noncoding | noncoding | noncoding |
| MSTRG. 129748. 1 | MORN5        | XLOC_134237       | 249 coding   | noncoding | noncoding | noncoding |
| MSTRG. 129751. 1 | LHX6         | XLOC_134240       | 315 coding   | noncoding | noncoding | noncoding |
| MSTRG. 129847. 1 |              | XLOC_134260       | 264 coding   | noncoding | noncoding | noncoding |
| MSTRG. 129948. 1 | STRBP        | XLOC_134281       | 204 coding   | noncoding | noncoding | noncoding |
| MSTRG. 129952. 1 | STRBP        | XLOC_134285       | 211 coding   | noncoding | noncoding | noncoding |
| MSTRG. 129854. 1 |              | XLOC_134287       | 210 coding   | noncoding | noncoding | noncoding |
| XM_011518882. 3  | DENND1A      | XLOC_134289       | 6039 coding  | coding    | coding    | coding    |
| MSTRG. 130202. 1 | DENND1A      | XLOC_134290       | 318 coding   | noncoding | noncoding | noncoding |
| MSTRG. 130234. 1 | DENND1A      | XLOC_134321       | 306 coding   | noncoding | noncoding | noncoding |
| MSTRG. 130257. 1 | DENND1A      | XLOC_134342       | 409 coding   | noncoding | noncoding | noncoding |
| MSTRG. 130058. 1 | NR6A1        | XLOC_134364       | 250 coding   | noncoding | noncoding | noncoding |
| MSTRG. 130098. 1 | NR6A1        | XLOC_134392       | 261 coding   | noncoding | noncoding | noncoding |
| MSTRG. 130033. 1 | OLFML2A      | XLOC_134394       | 258 coding   | noncoding | noncoding | noncoding |
| MSTRG. 130031. 1 |              | XLOC_134396       | 286 coding   | noncoding | noncoding | noncoding |
| MSTRG. 130028. 1 | WDR38        | XLOC_134397       | 261 coding   | noncoding | coding    | noncoding |
| MSTRG. 130102. 1 | ARPC5L       | XLOC_134399       | 303 coding   | noncoding | noncoding | noncoding |

|                |              |             |             |           |           |           |
|----------------|--------------|-------------|-------------|-----------|-----------|-----------|
| MSTRG.130125.1 | SCAI         | XLOC_134409 | 297 coding  | noncoding | noncoding | noncoding |
| MSTRG.130126.1 | SCAI         | XLOC_134410 | 295 coding  | noncoding | noncoding | noncoding |
| MSTRG.130127.1 | SCAI         | XLOC_134411 | 225 coding  | noncoding | noncoding | noncoding |
| MSTRG.130158.1 | MAPKAP1      | XLOC_134438 | 561 coding  | noncoding | noncoding | noncoding |
| MSTRG.130138.1 |              | XLOC_134450 | 240 coding  | noncoding | noncoding | noncoding |
| MSTRG.130267.1 |              | XLOC_134494 | 242 coding  | noncoding | noncoding | noncoding |
| MSTRG.130438.1 | SLC2A8       | XLOC_134525 | 280 coding  | noncoding | coding    | noncoding |
| MSTRG.130441.1 | RPL12        | XLOC_134527 | 657 coding  | coding    | coding    | coding    |
| MSTRG.130365.1 | NIBAN2       | XLOC_134539 | 254 coding  | noncoding | noncoding | noncoding |
| MSTRG.130490.1 | ENG          | XLOC_134563 | 289 coding  | noncoding | noncoding | noncoding |
| MSTRG.130492.1 | ENG          | XLOC_134564 | 320 coding  | noncoding | noncoding | noncoding |
| MSTRG.130507.1 |              | XLOC_134576 | 262 coding  | noncoding | noncoding | noncoding |
| MSTRG.130504.1 |              | XLOC_134577 | 283 coding  | noncoding | noncoding | noncoding |
| NR_033374.1    | SLC25A25-AS1 | XLOC_134584 | 3842 coding | noncoding | coding    | noncoding |
| MSTRG.130532.6 | LCN2         | XLOC_134587 | 504 coding  | coding    | noncoding | noncoding |
| MSTRG.130565.1 | DNM1         | XLOC_134594 | 235 coding  | noncoding | noncoding | noncoding |
| MSTRG.130566.1 | DNM1         | XLOC_134595 | 295 coding  | noncoding | noncoding | noncoding |
| MSTRG.130572.1 |              | XLOC_134600 | 286 coding  | noncoding | noncoding | noncoding |
| MSTRG.130552.1 |              | XLOC_134619 | 240 coding  | noncoding | noncoding | noncoding |
| XM_017015262.1 | KYAT1        | XLOC_134633 | 2782 coding | coding    | coding    | coding    |
| MSTRG.130620.1 | PHYHD1       | XLOC_134637 | 382 coding  | noncoding | noncoding | noncoding |
| MSTRG.130707.1 |              | XLOC_134671 | 231 coding  | noncoding | noncoding | noncoding |
| NM_016520.3    | C9orf78      | XLOC_134689 | 1795 coding | coding    | coding    | coding    |
| MSTRG.130814.1 | FNBP1        | XLOC_134696 | 317 coding  | noncoding | noncoding | noncoding |
| MSTRG.130815.1 | FNBP1        | XLOC_134697 | 223 coding  | noncoding | noncoding | noncoding |
| MSTRG.130746.1 |              | XLOC_134707 | 269 coding  | noncoding | noncoding | noncoding |
| MSTRG.130770.1 | HMCN2        | XLOC_134715 | 264 coding  | coding    | noncoding | noncoding |
| MSTRG.130777.1 |              | XLOC_134726 | 334 coding  | noncoding | noncoding | noncoding |
| MSTRG.130837.2 | ABL1         | XLOC_134728 | 1851 coding | coding    | coding    | coding    |
| MSTRG.130785.1 |              | XLOC_134737 | 276 coding  | noncoding | noncoding | noncoding |
| MSTRG.130879.1 |              | XLOC_134762 | 240 coding  | noncoding | noncoding | noncoding |
| MSTRG.130946.1 |              | XLOC_134763 | 281 coding  | noncoding | noncoding | noncoding |
| MSTRG.130956.1 | RAPGEF1      | XLOC_134772 | 250 coding  | noncoding | noncoding | noncoding |
| MSTRG.130969.1 | RAPGEF1      | XLOC_134785 | 418 coding  | noncoding | noncoding | noncoding |
| MSTRG.130900.1 |              | XLOC_134788 | 286 coding  | noncoding | noncoding | noncoding |
| MSTRG.130902.1 |              | XLOC_134789 | 258 coding  | noncoding | noncoding | noncoding |
| MSTRG.130909.1 |              | XLOC_134808 | 284 coding  | noncoding | noncoding | noncoding |
| MSTRG.130976.1 |              | XLOC_134812 | 327 coding  | noncoding | noncoding | noncoding |
| MSTRG.130980.1 | TTF1         | XLOC_134815 | 255 coding  | noncoding | noncoding | noncoding |
| XM_011518277.2 | AK8          | XLOC_134828 | 4825 coding | coding    | coding    | coding    |
| MSTRG.131059.1 | TSC1         | XLOC_134833 | 304 coding  | noncoding | noncoding | noncoding |
| MSTRG.131033.1 |              | XLOC_134841 | 267 coding  | noncoding | noncoding | noncoding |
| MSTRG.131037.1 |              | XLOC_134843 | 464 coding  | noncoding | noncoding | noncoding |

|                |              |             |             |           |           |           |
|----------------|--------------|-------------|-------------|-----------|-----------|-----------|
| MSTRG.131070.1 | GBGT1        | XLOC_134847 | 284 coding  | noncoding | noncoding | noncoding |
| MSTRG.131071.1 | GBGT1        | XLOC_134848 | 249 coding  | noncoding | noncoding | noncoding |
| MSTRG.131065.1 |              | XLOC_134849 | 248 coding  | noncoding | noncoding | noncoding |
| MSTRG.131131.1 | VAV2         | XLOC_134872 | 261 coding  | noncoding | noncoding | noncoding |
| MSTRG.131155.1 | VAV2         | XLOC_134881 | 269 coding  | noncoding | noncoding | noncoding |
| MSTRG.131163.1 | BRD3         | XLOC_134885 | 252 coding  | noncoding | noncoding | noncoding |
| MSTRG.131241.1 |              | XLOC_134927 | 394 coding  | noncoding | noncoding | noncoding |
| MSTRG.131266.1 |              | XLOC_134943 | 321 coding  | noncoding | noncoding | noncoding |
| XM_011518698.3 | SOHLH1       | XLOC_134951 | 4973 coding | coding    | coding    | coding    |
| MSTRG.131296.1 | KCNT1        | XLOC_134957 | 275 coding  | noncoding | noncoding | noncoding |
| XM_017014301.1 | CAMSAP1      | XLOC_134960 | 7912 coding | coding    | coding    | coding    |
| MSTRG.131315.1 | CAMSAP1      | XLOC_134961 | 249 coding  | noncoding | noncoding | noncoding |
| MSTRG.131307.1 |              | XLOC_134971 | 250 coding  | noncoding | noncoding | noncoding |
| MSTRG.131310.1 | UBAC1        | XLOC_134973 | 235 coding  | noncoding | noncoding | noncoding |
| MSTRG.131338.1 | NACC2        | XLOC_134983 | 300 coding  | noncoding | noncoding | noncoding |
| NM_001363746.1 | LHX3         | XLOC_134989 | 2700 coding | coding    | coding    | coding    |
| MSTRG.131326.1 | LOC101928722 | XLOC_134992 | 268 coding  | noncoding | noncoding | noncoding |
| NR_111982.1    | CCDC187      | XLOC_134994 | 4010 coding | noncoding | coding    | coding    |
| MSTRG.131328.1 | DKFZP434A062 | XLOC_134999 | 201 coding  | noncoding | noncoding | noncoding |
| NR_026964.3    | DKFZP434A062 | XLOC_135000 | 5022 coding | noncoding | coding    | coding    |
| NM_001080849.3 | DNLZ         | XLOC_135006 | 3096 coding | coding    | coding    | coding    |
| NR_003672.2    | SNHG7        | XLOC_135034 | 2176 coding | noncoding | noncoding | noncoding |
| MSTRG.131415.1 |              | XLOC_135041 | 225 coding  | noncoding | noncoding | noncoding |
| MSTRG.131488.5 | ABCA2        | XLOC_135067 | 351 coding  | noncoding | coding    | noncoding |
| MSTRG.131478.1 | NPDC1        | XLOC_135071 | 254 coding  | noncoding | noncoding | noncoding |
| MSTRG.131505.1 | GRIN1        | XLOC_135083 | 283 coding  | noncoding | coding    | noncoding |
| MSTRG.131557.1 | PNPLA7       | XLOC_135113 | 361 coding  | noncoding | noncoding | noncoding |
| MSTRG.131558.1 | PNPLA7       | XLOC_135114 | 300 coding  | noncoding | noncoding | noncoding |
| MSTRG.131560.1 | PNPLA7       | XLOC_135116 | 285 coding  | noncoding | noncoding | noncoding |
| MSTRG.131569.1 | DPH7         | XLOC_135120 | 266 coding  | noncoding | noncoding | noncoding |
| MSTRG.131561.1 |              | XLOC_135122 | 300 coding  | noncoding | noncoding | noncoding |
| MSTRG.131608.3 | ARRDC1-AS1   | XLOC_135123 | 3180 coding | coding    | coding    | coding    |
| MSTRG.131581.1 | CACNA1B      | XLOC_135132 | 276 coding  | noncoding | noncoding | noncoding |
| MSTRG.131590.1 | CACNA1B      | XLOC_135136 | 297 coding  | noncoding | noncoding | noncoding |
| MSTRG.131575.1 |              | XLOC_135139 | 249 coding  | coding    | noncoding | noncoding |
| MSTRG.131600.4 | LOC112267861 | XLOC_135142 | 4276 coding | coding    | coding    | noncoding |
| MSTRG.131604.1 |              | XLOC_135143 | 397 coding  | noncoding | noncoding | noncoding |
| NR_163254.1    | ZMYND11      | XLOC_135150 | 3842 coding | coding    | coding    | coding    |
| MSTRG.131656.1 | ZMYND11      | XLOC_135163 | 237 coding  | noncoding | noncoding | noncoding |
| MSTRG.131633.1 |              | XLOC_135196 | 237 coding  | noncoding | noncoding | noncoding |
| NM_012341.3    | GTPBP4       | XLOC_135210 | 4656 coding | coding    | coding    | coding    |
| NR_024628.1    | IDI2-AS1     | XLOC_135212 | 1088 coding | noncoding | coding    | coding    |
| MSTRG.131722.1 |              | XLOC_135238 | 317 coding  | noncoding | noncoding | noncoding |

|                 |              |             |             |           |           |           |
|-----------------|--------------|-------------|-------------|-----------|-----------|-----------|
| MSTRG.131796.1  |              | XLOC_135258 | 334 coding  | coding    | noncoding | noncoding |
| MSTRG.131805.1  |              | XLOC_135265 | 290 coding  | noncoding | noncoding | noncoding |
| MSTRG.131837.1  |              | XLOC_135272 | 225 coding  | noncoding | noncoding | noncoding |
| MSTRG.131842.1  | LOC105376356 | XLOC_135276 | 295 coding  | noncoding | noncoding | noncoding |
| MSTRG.131852.1  | LOC105376360 | XLOC_135279 | 266 coding  | noncoding | noncoding | noncoding |
| MSTRG.131853.1  | LOC105376360 | XLOC_135280 | 309 coding  | noncoding | noncoding | noncoding |
| MSTRG.131868.1  | LOC105376360 | XLOC_135286 | 253 coding  | noncoding | noncoding | noncoding |
| MSTRG.131872.1  | LOC105376360 | XLOC_135287 | 249 coding  | noncoding | noncoding | noncoding |
| MSTRG.131973.28 | AKR1E2       | XLOC_135336 | 512 coding  | coding    | coding    | coding    |
| MSTRG.131977.1  | AKR1C6P      | XLOC_135338 | 234 coding  | noncoding | noncoding | noncoding |
| MSTRG.132017.1  | NET1         | XLOC_135397 | 268 coding  | noncoding | noncoding | noncoding |
| MSTRG.132081.1  |              | XLOC_135410 | 223 coding  | noncoding | noncoding | noncoding |
| MSTRG.132086.1  |              | XLOC_135412 | 222 coding  | noncoding | noncoding | noncoding |
| MSTRG.132087.1  |              | XLOC_135413 | 216 coding  | noncoding | noncoding | noncoding |
| NM_001258453.1  | FBH1         | XLOC_135422 | 3688 coding | coding    | coding    | coding    |
| MSTRG.132507.1  |              | XLOC_135444 | 296 coding  | noncoding | noncoding | noncoding |
| MSTRG.132510.1  |              | XLOC_135447 | 313 coding  | noncoding | noncoding | noncoding |
| MSTRG.132550.1  | LINC02648    | XLOC_135481 | 351 coding  | noncoding | noncoding | noncoding |
| MSTRG.132212.1  | LINC02642    | XLOC_135541 | 473 coding  | noncoding | noncoding | noncoding |
| MSTRG.132228.1  | ITIH5        | XLOC_135551 | 342 coding  | noncoding | noncoding | noncoding |
| MSTRG.132323.1  | TAF3         | XLOC_135567 | 285 coding  | noncoding | noncoding | noncoding |
| MSTRG.132436.1  | LOC101928272 | XLOC_135694 | 265 coding  | noncoding | noncoding | noncoding |
| MSTRG.132437.1  |              | XLOC_135695 | 284 coding  | noncoding | coding    | noncoding |
| MSTRG.132467.1  | LINC02663    | XLOC_135698 | 545 coding  | noncoding | noncoding | noncoding |
| MSTRG.132457.1  | LOC105376403 | XLOC_135704 | 278 coding  | noncoding | noncoding | noncoding |
| MSTRG.132484.1  |              | XLOC_135712 | 283 coding  | noncoding | noncoding | noncoding |
| MSTRG.132487.1  |              | XLOC_135713 | 300 coding  | noncoding | noncoding | noncoding |
| MSTRG.132496.1  | CELF2-DT     | XLOC_135716 | 264 coding  | noncoding | noncoding | noncoding |
| XM_017015550.2  | CELF2        | XLOC_135717 | 4805 coding | coding    | coding    | coding    |
| NM_001025076.2  | CELF2        | XLOC_135717 | 8044 coding | coding    | coding    | coding    |
| MSTRG.132654.1  | CELF2        | XLOC_135719 | 411 coding  | noncoding | noncoding | noncoding |
| MSTRG.132674.1  | CELF2        | XLOC_135727 | 238 coding  | noncoding | noncoding | noncoding |
| MSTRG.132689.1  | CELF2        | XLOC_135734 | 324 coding  | noncoding | noncoding | noncoding |
| MSTRG.132603.5  | USP6NL       | XLOC_135776 | 1191 coding | coding    | noncoding | noncoding |
| MSTRG.132558.1  |              | XLOC_135784 | 397 coding  | noncoding | noncoding | noncoding |
| MSTRG.132574.1  |              | XLOC_135787 | 231 coding  | noncoding | noncoding | noncoding |
| MSTRG.132616.2  | UPF2         | XLOC_135795 | 5270 coding | coding    | noncoding | noncoding |
| MSTRG.132597.1  |              | XLOC_135797 | 283 coding  | noncoding | noncoding | noncoding |
| MSTRG.132634.9  | CDC123       | XLOC_135800 | 1470 coding | coding    | coding    | noncoding |
| MSTRG.132634.10 | CDC123       | XLOC_135800 | 1461 coding | coding    | coding    | noncoding |
| XM_011519593.3  | CAMK1D       | XLOC_135807 | 1627 coding | coding    | coding    | coding    |
| MSTRG.132913.1  | CAMK1D       | XLOC_135837 | 261 coding  | noncoding | noncoding | noncoding |
| MSTRG.132640.1  |              | XLOC_135882 | 206 coding  | noncoding | noncoding | noncoding |

|                |              |             |             |           |           |           |
|----------------|--------------|-------------|-------------|-----------|-----------|-----------|
| MSTRG.132648.1 | MCM10        | XLOC_135897 | 262 coding  | noncoding | noncoding | noncoding |
| MSTRG.132806.1 | FRMD4A       | XLOC_135928 | 231 coding  | noncoding | noncoding | noncoding |
| MSTRG.132807.1 | FRMD4A       | XLOC_135929 | 205 coding  | noncoding | noncoding | noncoding |
| MSTRG.132832.3 | FAM107B      | XLOC_135964 | 4126 coding | coding    | noncoding | noncoding |
| MSTRG.132969.1 | LOC105376434 | XLOC_135992 | 276 coding  | noncoding | noncoding | noncoding |
| MSTRG.132984.1 | FAM171A1     | XLOC_135999 | 327 coding  | noncoding | noncoding | noncoding |
| MSTRG.132970.1 |              | XLOC_136001 | 281 coding  | noncoding | noncoding | noncoding |
| MSTRG.132973.1 |              | XLOC_136002 | 291 coding  | noncoding | noncoding | noncoding |
| MSTRG.133057.1 |              | XLOC_136015 | 286 coding  | noncoding | noncoding | noncoding |
| MSTRG.133135.1 | CUBN         | XLOC_136043 | 273 coding  | noncoding | noncoding | noncoding |
| MSTRG.133171.5 | TRDMT1       | XLOC_136057 | 848 coding  | noncoding | noncoding | noncoding |
| MSTRG.133171.6 | VIM          | XLOC_136057 | 2611 coding | coding    | coding    | coding    |
| MSTRG.133159.1 |              | XLOC_136093 | 297 coding  | noncoding | noncoding | noncoding |
| MSTRG.133164.1 | HACD1        | XLOC_136095 | 233 coding  | noncoding | noncoding | noncoding |
| MSTRG.133160.1 |              | XLOC_136097 | 437 coding  | noncoding | noncoding | noncoding |
| MSTRG.133244.1 |              | XLOC_136109 | 217 coding  | noncoding | noncoding | noncoding |
| MSTRG.133346.1 | CACNB2       | XLOC_136124 | 235 coding  | noncoding | noncoding | noncoding |
| MSTRG.133376.1 | NSUN6        | XLOC_136142 | 229 coding  | noncoding | noncoding | noncoding |
| MSTRG.133271.1 | LOC105376440 | XLOC_136146 | 405 coding  | noncoding | noncoding | noncoding |
| MSTRG.133273.1 | LOC105376440 | XLOC_136148 | 326 coding  | noncoding | noncoding | noncoding |
| MSTRG.133275.1 | LOC105376440 | XLOC_136149 | 392 coding  | noncoding | noncoding | noncoding |
| MSTRG.133266.1 |              | XLOC_136155 | 306 coding  | coding    | noncoding | noncoding |
| MSTRG.133326.1 |              | XLOC_136206 | 281 coding  | noncoding | noncoding | noncoding |
| XR_001747384.2 | LOC105376442 | XLOC_136208 | 8519 coding | noncoding | noncoding | noncoding |
| MSTRG.133422.1 | NEBL         | XLOC_136223 | 259 coding  | noncoding | noncoding | noncoding |
| MSTRG.133429.1 | NEBL         | XLOC_136227 | 240 coding  | noncoding | noncoding | noncoding |
| MSTRG.133388.1 |              | XLOC_136238 | 243 coding  | noncoding | noncoding | noncoding |
| MSTRG.133390.1 |              | XLOC_136240 | 280 coding  | noncoding | noncoding | noncoding |
| MSTRG.133391.1 |              | XLOC_136241 | 241 coding  | noncoding | noncoding | noncoding |
| MSTRG.133400.1 |              | XLOC_136247 | 259 coding  | noncoding | noncoding | noncoding |
| XM_024448192.1 | MLLT10       | XLOC_136251 | 4593 coding | coding    | coding    | coding    |
| XM_024448193.1 | MLLT10       | XLOC_136251 | 4585 coding | coding    | coding    | coding    |
| MSTRG.133488.1 |              | XLOC_136278 | 310 coding  | noncoding | noncoding | noncoding |
| MSTRG.133573.7 | PIP4K2A      | XLOC_136306 | 3615 coding | coding    | coding    | noncoding |
| MSTRG.133561.1 |              | XLOC_136309 | 302 coding  | noncoding | noncoding | noncoding |
| MSTRG.133565.1 |              | XLOC_136313 | 314 coding  | noncoding | noncoding | noncoding |
| MSTRG.133635.1 | LOC105376454 | XLOC_136342 | 232 coding  | noncoding | noncoding | noncoding |
| MSTRG.133637.1 | LOC105376454 | XLOC_136343 | 270 coding  | noncoding | noncoding | noncoding |
| MSTRG.133670.1 | KIAA1217     | XLOC_136348 | 274 coding  | noncoding | noncoding | noncoding |
| MSTRG.133674.1 | KIAA1217     | XLOC_136351 | 201 coding  | noncoding | noncoding | noncoding |
| MSTRG.133678.1 | KIAA1217     | XLOC_136353 | 225 coding  | noncoding | noncoding | noncoding |
| MSTRG.133680.1 | KIAA1217     | XLOC_136354 | 292 coding  | noncoding | noncoding | noncoding |
| MSTRG.133683.1 | KIAA1217     | XLOC_136355 | 253 coding  | noncoding | noncoding | noncoding |

|                 |              |             |             |           |           |           |
|-----------------|--------------|-------------|-------------|-----------|-----------|-----------|
| MSTRG.133666.1  |              | XLOC_136374 | 291 coding  | noncoding | noncoding | noncoding |
| MSTRG.133715.1  |              | XLOC_136381 | 247 coding  | noncoding | noncoding | noncoding |
| MSTRG.133733.1  | GPR158       | XLOC_136386 | 304 coding  | noncoding | noncoding | noncoding |
| MSTRG.133740.1  | GPR158       | XLOC_136388 | 223 coding  | noncoding | noncoding | noncoding |
| MSTRG.133784.1  | MYO3A        | XLOC_136397 | 319 coding  | noncoding | noncoding | noncoding |
| MSTRG.133789.1  | MYO3A        | XLOC_136399 | 246 coding  | noncoding | noncoding | noncoding |
| MSTRG.133824.22 | ABI1         | XLOC_136418 | 1025 coding | coding    | noncoding | noncoding |
| MSTRG.133820.1  |              | XLOC_136422 | 214 coding  | noncoding | noncoding | noncoding |
| MSTRG.133887.1  |              | XLOC_136456 | 245 coding  | noncoding | noncoding | noncoding |
| MSTRG.133899.1  |              | XLOC_136481 | 306 coding  | noncoding | noncoding | noncoding |
| MSTRG.133911.1  | MKX          | XLOC_136484 | 297 coding  | noncoding | noncoding | noncoding |
| MSTRG.133906.1  |              | XLOC_136488 | 251 coding  | noncoding | noncoding | noncoding |
| MSTRG.133958.1  | ARMC4        | XLOC_136491 | 285 coding  | noncoding | noncoding | noncoding |
| MSTRG.133959.1  | ARMC4        | XLOC_136492 | 283 coding  | noncoding | noncoding | noncoding |
| MSTRG.133962.1  | ARMC4        | XLOC_136494 | 305 coding  | noncoding | noncoding | noncoding |
| MSTRG.133967.1  |              | XLOC_136508 | 249 coding  | noncoding | noncoding | noncoding |
| MSTRG.133969.1  |              | XLOC_136509 | 268 coding  | noncoding | noncoding | noncoding |
| MSTRG.133976.1  | LINC02652    | XLOC_136511 | 288 coding  | noncoding | noncoding | noncoding |
| MSTRG.133979.1  |              | XLOC_136524 | 255 coding  | noncoding | noncoding | noncoding |
| MSTRG.133986.1  | LOC107984170 | XLOC_136528 | 234 coding  | noncoding | noncoding | noncoding |
| MSTRG.133984.1  |              | XLOC_136529 | 278 coding  | noncoding | noncoding | noncoding |
| MSTRG.133988.1  |              | XLOC_136531 | 259 coding  | noncoding | noncoding | noncoding |
| MSTRG.133994.1  | LINC01517    | XLOC_136533 | 320 coding  | noncoding | noncoding | noncoding |
| MSTRG.134006.1  |              | XLOC_136538 | 248 coding  | noncoding | noncoding | noncoding |
| MSTRG.134007.1  |              | XLOC_136539 | 318 coding  | noncoding | noncoding | noncoding |
| MSTRG.134008.1  |              | XLOC_136540 | 244 coding  | noncoding | noncoding | noncoding |
| MSTRG.134012.1  |              | XLOC_136543 | 411 coding  | coding    | noncoding | noncoding |
| MSTRG.134017.1  | LOC105376471 | XLOC_136548 | 287 coding  | noncoding | noncoding | noncoding |
| MSTRG.134028.1  | LYZL1        | XLOC_136554 | 295 coding  | noncoding | noncoding | noncoding |
| MSTRG.134085.1  |              | XLOC_136569 | 261 coding  | noncoding | noncoding | noncoding |
| MSTRG.134103.1  |              | XLOC_136578 | 225 coding  | noncoding | noncoding | noncoding |
| MSTRG.134105.1  |              | XLOC_136580 | 269 coding  | noncoding | noncoding | noncoding |
| MSTRG.134120.1  | GOLGA2P6     | XLOC_136592 | 242 coding  | noncoding | noncoding | noncoding |
| MSTRG.134150.1  |              | XLOC_136604 | 262 coding  | noncoding | noncoding | noncoding |
| MSTRG.134301.1  | LOC105376482 | XLOC_136639 | 467 coding  | noncoding | noncoding | noncoding |
| XM_006717498.2  | ZEB1         | XLOC_136658 | 5814 coding | coding    | coding    | coding    |
| MSTRG.134315.1  |              | XLOC_136670 | 265 coding  | noncoding | noncoding | noncoding |
| MSTRG.134345.8  | LOC107984219 | XLOC_136676 | 5641 coding | coding    | coding    | noncoding |
| MSTRG.134323.1  |              | XLOC_136684 | 306 coding  | noncoding | noncoding | noncoding |
| MSTRG.134726.50 | CCDC7        | XLOC_136688 | 508 coding  | noncoding | noncoding | noncoding |
| MSTRG.134733.1  | CCDC7        | XLOC_136694 | 227 coding  | noncoding | noncoding | noncoding |
| MSTRG.134775.1  | CCDC7        | XLOC_136704 | 232 coding  | coding    | noncoding | noncoding |
| MSTRG.134807.1  | ITGB1-DT     | XLOC_136716 | 307 coding  | noncoding | noncoding | noncoding |

|                  |              |             |             |           |           |           |
|------------------|--------------|-------------|-------------|-----------|-----------|-----------|
| MSTRG. 134409. 1 |              | XLOC_136752 | 316 coding  | noncoding | noncoding | noncoding |
| MSTRG. 134415. 1 |              | XLOC_136757 | 354 coding  | noncoding | noncoding | noncoding |
| MSTRG. 134438. 1 |              | XLOC_136760 | 298 coding  | noncoding | noncoding | noncoding |
| MSTRG. 134439. 1 |              | XLOC_136761 | 211 coding  | coding    | noncoding | noncoding |
| MSTRG. 134447. 1 |              | XLOC_136782 | 286 coding  | noncoding | noncoding | noncoding |
| MSTRG. 134518. 1 | CREM         | XLOC_136796 | 345 coding  | noncoding | noncoding | noncoding |
| NM_001282853. 1  | CCNY         | XLOC_136798 | 4769 coding | coding    | coding    | coding    |
| NM_001282852. 1  | CCNY         | XLOC_136798 | 4631 coding | coding    | coding    | coding    |
| MSTRG. 134573. 1 | CCNY         | XLOC_136799 | 249 coding  | noncoding | noncoding | noncoding |
| MSTRG. 134574. 1 | CCNY         | XLOC_136800 | 314 coding  | noncoding | noncoding | noncoding |
| MSTRG. 134533. 1 |              | XLOC_136858 | 316 coding  | noncoding | noncoding | noncoding |
| MSTRG. 134535. 1 |              | XLOC_136859 | 313 coding  | noncoding | noncoding | noncoding |
| MSTRG. 134537. 1 | LINC02630    | XLOC_136860 | 266 coding  | noncoding | noncoding | noncoding |
| MSTRG. 134564. 1 |              | XLOC_136872 | 2151 coding | coding    | noncoding | noncoding |
| MSTRG. 134631. 1 |              | XLOC_136882 | 282 coding  | noncoding | noncoding | noncoding |
| MSTRG. 134636. 1 |              | XLOC_136888 | 250 coding  | noncoding | noncoding | noncoding |
| MSTRG. 134642. 1 |              | XLOC_136890 | 242 coding  | noncoding | noncoding | noncoding |
| NM_001278178. 1  | ZNF33A       | XLOC_136928 | 6126 coding | coding    | coding    | coding    |
| NM_001278171. 2  | ZNF33A       | XLOC_136928 | 6239 coding | coding    | coding    | coding    |
| MSTRG. 134845. 1 | ZNF37A       | XLOC_136947 | 207 coding  | noncoding | noncoding | noncoding |
| MSTRG. 134719. 1 | LOC105376500 | XLOC_136950 | 222 coding  | noncoding | noncoding | noncoding |
| NR_024497. 2     | LINC00999    | XLOC_136961 | 5253 coding | coding    | coding    | coding    |
| MSTRG. 135022. 1 | LOC105378271 | XLOC_137043 | 285 coding  | noncoding | noncoding | noncoding |
| MSTRG. 135030. 1 |              | XLOC_137049 | 352 coding  | noncoding | noncoding | noncoding |
| MSTRG. 135048. 1 | ZNF487       | XLOC_137055 | 284 coding  | noncoding | noncoding | noncoding |
| MSTRG. 135082. 1 |              | XLOC_137079 | 452 coding  | noncoding | noncoding | noncoding |
| MSTRG. 135096. 1 |              | XLOC_137081 | 278 coding  | noncoding | noncoding | noncoding |
| MSTRG. 135135. 1 | RSU1P2       | XLOC_137120 | 317 coding  | noncoding | noncoding | noncoding |
| MSTRG. 135474. 1 | AGAP10P      | XLOC_137136 | 364 coding  | noncoding | noncoding | noncoding |
| MSTRG. 135512. 1 | LOC107984026 | XLOC_137167 | 267 coding  | noncoding | noncoding | noncoding |
| XR_945930. 3     | FAM245B      | XLOC_137179 | 6005 coding | noncoding | noncoding | noncoding |
| MSTRG. 135531. 2 | BMS1P1       | XLOC_137180 | 320 coding  | coding    | noncoding | noncoding |
| XM_011539606. 3  | PTPN20       | XLOC_137189 | 4306 coding | coding    | coding    | coding    |
| MSTRG. 135214. 1 |              | XLOC_137207 | 222 coding  | coding    | noncoding | noncoding |
| MSTRG. 135245. 1 | ANXA8        | XLOC_137216 | 220 coding  | noncoding | noncoding | noncoding |
| MSTRG. 135310. 1 | ARHGAP22     | XLOC_137267 | 503 coding  | noncoding | noncoding | noncoding |
| MSTRG. 135311. 1 | ARHGAP22     | XLOC_137268 | 273 coding  | noncoding | noncoding | noncoding |
| MSTRG. 135335. 1 |              | XLOC_137332 | 224 coding  | noncoding | noncoding | noncoding |
| MSTRG. 135455. 3 | PARG         | XLOC_137357 | 3404 coding | coding    | coding    | noncoding |
| MSTRG. 135567. 1 | WASHC2A      | XLOC_137368 | 353 coding  | noncoding | noncoding | noncoding |
| MSTRG. 135568. 1 | WASHC2A      | XLOC_137369 | 271 coding  | noncoding | noncoding | noncoding |
| MSTRG. 135448. 1 | ASAH2        | XLOC_137372 | 420 coding  | coding    | noncoding | noncoding |
| MSTRG. 135580. 1 |              | XLOC_137390 | 263 coding  | coding    | noncoding | noncoding |

|                  |              |             |             |           |           |           |
|------------------|--------------|-------------|-------------|-----------|-----------|-----------|
| MSTRG. 135673. 1 | PRKG1        | XLOC_137401 | 296 coding  | noncoding | noncoding | noncoding |
| MSTRG. 135678. 1 | PRKG1        | XLOC_137404 | 247 coding  | noncoding | noncoding | noncoding |
| MSTRG. 135696. 1 | PRKG1        | XLOC_137414 | 291 coding  | noncoding | noncoding | noncoding |
| MSTRG. 135598. 1 |              | XLOC_137435 | 246 coding  | noncoding | noncoding | noncoding |
| MSTRG. 135613. 1 |              | XLOC_137441 | 268 coding  | noncoding | noncoding | noncoding |
| MSTRG. 135615. 1 |              | XLOC_137445 | 212 coding  | noncoding | noncoding | noncoding |
| MSTRG. 135616. 1 |              | XLOC_137446 | 323 coding  | noncoding | noncoding | noncoding |
| MSTRG. 135638. 1 | LOC105378308 | XLOC_137450 | 280 coding  | coding    | noncoding | noncoding |
| MSTRG. 135639. 1 | LOC105378308 | XLOC_137451 | 278 coding  | noncoding | noncoding | noncoding |
| MSTRG. 135652. 1 |              | XLOC_137459 | 233 coding  | noncoding | noncoding | noncoding |
| MSTRG. 135653. 1 |              | XLOC_137460 | 210 coding  | noncoding | noncoding | noncoding |
| MSTRG. 135841. 1 | PCDH15       | XLOC_137471 | 292 coding  | noncoding | noncoding | noncoding |
| MSTRG. 135849. 1 | PCDH15       | XLOC_137477 | 254 coding  | noncoding | noncoding | noncoding |
| MSTRG. 135859. 1 | PCDH15       | XLOC_137482 | 302 coding  | noncoding | noncoding | noncoding |
| MSTRG. 135879. 1 | PCDH15       | XLOC_137492 | 214 coding  | noncoding | noncoding | noncoding |
| MSTRG. 135735. 1 |              | XLOC_137496 | 267 coding  | noncoding | noncoding | noncoding |
| MSTRG. 135772. 1 |              | XLOC_137519 | 273 coding  | noncoding | noncoding | noncoding |
| MSTRG. 135789. 1 |              | XLOC_137527 | 325 coding  | noncoding | noncoding | noncoding |
| MSTRG. 135790. 1 |              | XLOC_137528 | 262 coding  | noncoding | noncoding | noncoding |
| MSTRG. 135796. 1 |              | XLOC_137531 | 317 coding  | noncoding | noncoding | noncoding |
| MSTRG. 135798. 1 |              | XLOC_137532 | 232 coding  | noncoding | noncoding | noncoding |
| MSTRG. 135804. 1 |              | XLOC_137537 | 461 coding  | noncoding | noncoding | noncoding |
| MSTRG. 135890. 1 | LOC105378314 | XLOC_137542 | 447 coding  | noncoding | noncoding | noncoding |
| MSTRG. 135896. 1 |              | XLOC_137547 | 286 coding  | noncoding | noncoding | noncoding |
| NM_018464. 5     | CISD1        | XLOC_137554 | 2375 coding | coding    | coding    | noncoding |
| NM_001270782. 1  | TFAM         | XLOC_137568 | 5206 coding | coding    | noncoding | coding    |
| MSTRG. 135928. 1 | LOC105378316 | XLOC_137574 | 665 coding  | noncoding | noncoding | noncoding |
| MSTRG. 135969. 1 | BICC1        | XLOC_137577 | 218 coding  | noncoding | noncoding | noncoding |
| MSTRG. 135972. 1 | BICC1        | XLOC_137578 | 666 coding  | noncoding | noncoding | noncoding |
| MSTRG. 135981. 1 | BICC1        | XLOC_137581 | 244 coding  | noncoding | noncoding | noncoding |
| MSTRG. 135986. 1 | LOC107984235 | XLOC_137595 | 306 coding  | noncoding | noncoding | noncoding |
| MSTRG. 135989. 1 | LOC107984235 | XLOC_137597 | 282 coding  | noncoding | noncoding | noncoding |
| MSTRG. 135984. 1 |              | XLOC_137598 | 277 coding  | coding    | noncoding | noncoding |
| MSTRG. 135996. 1 | MRLN         | XLOC_137605 | 432 coding  | noncoding | noncoding | noncoding |
| MSTRG. 136100. 1 |              | XLOC_137627 | 285 coding  | noncoding | noncoding | noncoding |
| MSTRG. 136109. 1 |              | XLOC_137633 | 248 coding  | noncoding | noncoding | noncoding |
| MSTRG. 136209. 1 | ARID5B       | XLOC_137660 | 284 coding  | coding    | noncoding | noncoding |
| MSTRG. 136161. 1 |              | XLOC_137692 | 288 coding  | noncoding | noncoding | noncoding |
| MSTRG. 136168. 1 |              | XLOC_137696 | 306 coding  | noncoding | noncoding | noncoding |
| MSTRG. 136272. 1 | ZNF365       | XLOC_137724 | 268 coding  | noncoding | noncoding | noncoding |
| MSTRG. 136248. 1 |              | XLOC_137735 | 371 coding  | noncoding | noncoding | noncoding |
| MSTRG. 136294. 1 | LOC101929846 | XLOC_137758 | 222 coding  | noncoding | noncoding | noncoding |
| MSTRG. 136335. 1 |              | XLOC_137776 | 283 coding  | noncoding | noncoding | noncoding |

|                   |              |             |              |           |           |           |
|-------------------|--------------|-------------|--------------|-----------|-----------|-----------|
| MSTRG. 136492. 1  | CTNNA3       | XLOC_137805 | 306 coding   | noncoding | noncoding | noncoding |
| MSTRG. 136493. 1  | CTNNA3       | XLOC_137806 | 240 coding   | noncoding | noncoding | noncoding |
| MSTRG. 136529. 1  | CTNNA3       | XLOC_137828 | 250 coding   | noncoding | noncoding | noncoding |
| MSTRG. 136536. 1  | CTNNA3       | XLOC_137832 | 259 coding   | noncoding | noncoding | noncoding |
| MSTRG. 136545. 1  | CTNNA3       | XLOC_137837 | 315 coding   | coding    | noncoding | noncoding |
| MSTRG. 136548. 1  | CTNNA3       | XLOC_137839 | 249 coding   | noncoding | noncoding | noncoding |
| MSTRG. 136551. 1  |              | XLOC_137841 | 311 coding   | noncoding | noncoding | noncoding |
| MSTRG. 136477. 1  |              | XLOC_137844 | 280 coding   | noncoding | noncoding | noncoding |
| MSTRG. 136474. 1  |              | XLOC_137845 | 299 coding   | noncoding | noncoding | noncoding |
| MSTRG. 136472. 1  |              | XLOC_137846 | 303 coding   | noncoding | noncoding | noncoding |
| MSTRG. 136563. 1  | SIRT1        | XLOC_137849 | 362 coding   | noncoding | noncoding | noncoding |
| MSTRG. 136593. 26 | RUFY2        | XLOC_137859 | 2393 coding  | coding    | noncoding | noncoding |
| XM_011540205. 2   | TET1         | XLOC_137870 | 13626 coding | coding    | coding    | coding    |
| MSTRG. 136608. 1  | TET1         | XLOC_137871 | 317 coding   | noncoding | noncoding | noncoding |
| MSTRG. 136613. 1  | TET1         | XLOC_137873 | 285 coding   | noncoding | noncoding | noncoding |
| MSTRG. 136617. 1  | TET1         | XLOC_137874 | 252 coding   | noncoding | noncoding | noncoding |
| MSTRG. 136655. 1  |              | XLOC_137882 | 204 coding   | noncoding | noncoding | noncoding |
| MSTRG. 136689. 1  | SRGN         | XLOC_137894 | 219 coding   | noncoding | noncoding | noncoding |
| MSTRG. 136705. 1  | SUPV3L1      | XLOC_137904 | 243 coding   | noncoding | noncoding | noncoding |
| MSTRG. 136710. 4  | HKDC1        | XLOC_137906 | 335 coding   | coding    | noncoding | noncoding |
| MSTRG. 136762. 1  | HK1          | XLOC_137908 | 259 coding   | noncoding | noncoding | noncoding |
| MSTRG. 136764. 1  | HK1          | XLOC_137909 | 280 coding   | noncoding | noncoding | noncoding |
| MSTRG. 136767. 1  | HK1          | XLOC_137911 | 677 coding   | noncoding | noncoding | noncoding |
| MSTRG. 136714. 1  |              | XLOC_137915 | 291 coding   | noncoding | noncoding | noncoding |
| MSTRG. 136727. 1  | TSPAN15      | XLOC_137920 | 304 coding   | noncoding | noncoding | noncoding |
| MSTRG. 136734. 1  | TSPAN15      | XLOC_137923 | 309 coding   | noncoding | noncoding | noncoding |
| MSTRG. 136718. 1  |              | XLOC_137928 | 292 coding   | coding    | noncoding | noncoding |
| MSTRG. 136798. 1  | H2AFY2       | XLOC_137950 | 267 coding   | noncoding | noncoding | noncoding |
| MSTRG. 136821. 1  | LRRC20       | XLOC_137963 | 280 coding   | noncoding | noncoding | noncoding |
| XM_011539301. 2   | ADAMTS14     | XLOC_137982 | 4563 coding  | coding    | coding    | coding    |
| XR_002957082. 1   | LOC112268061 | XLOC_138008 | 14684 coding | noncoding | coding    | noncoding |
| MSTRG. 136905. 1  | UNC5B        | XLOC_138009 | 393 coding   | noncoding | noncoding | noncoding |
| MSTRG. 136926. 1  | SLC29A3      | XLOC_138016 | 299 coding   | noncoding | noncoding | noncoding |
| XM_011540369. 2   | CHST3        | XLOC_138024 | 8897 coding  | coding    | coding    | coding    |
| NM_001242546. 1   | ANAPC16      | XLOC_138032 | 3569 coding  | coding    | coding    | noncoding |
| MSTRG. 136991. 1  |              | XLOC_138041 | 291 coding   | noncoding | noncoding | noncoding |
| MSTRG. 137019. 1  | OIT3         | XLOC_138060 | 281 coding   | noncoding | noncoding | noncoding |
| MSTRG. 137025. 1  | PLA2G12B     | XLOC_138062 | 394 coding   | coding    | noncoding | noncoding |
| MSTRG. 137132. 1  | CFAP70       | XLOC_138076 | 284 coding   | noncoding | noncoding | noncoding |
| MSTRG. 137064. 1  | LOC105378360 | XLOC_138102 | 267 coding   | noncoding | noncoding | noncoding |
| XR_002956964. 1   | FUT11        | XLOC_138109 | 1647 coding  | coding    | coding    | coding    |
| NM_003373. 4      | VCL          | XLOC_138120 | 6487 coding  | coding    | coding    | coding    |
| MSTRG. 137304. 1  | ADK          | XLOC_138168 | 302 coding   | noncoding | noncoding | noncoding |

|                  |              |             |              |           |           |           |
|------------------|--------------|-------------|--------------|-----------|-----------|-----------|
| MSTRG. 137157. 1 |              | XLOC_138173 | 261 coding   | noncoding | noncoding | noncoding |
| NM_001256469. 1  | KAT6B        | XLOC_138174 | 7623 coding  | coding    | coding    | coding    |
| MSTRG. 137243. 1 | VDAC2        | XLOC_138187 | 317 coding   | noncoding | noncoding | noncoding |
| MSTRG. 138105. 1 | LRMDA        | XLOC_138255 | 308 coding   | noncoding | noncoding | noncoding |
| MSTRG. 138117. 1 | LOC112268057 | XLOC_138266 | 300 coding   | noncoding | noncoding | noncoding |
| MSTRG. 138123. 1 | LRMDA        | XLOC_138272 | 262 coding   | noncoding | noncoding | noncoding |
| MSTRG. 137321. 1 |              | XLOC_138275 | 276 coding   | noncoding | noncoding | noncoding |
| MSTRG. 137374. 1 | KCNMA1       | XLOC_138293 | 257 coding   | noncoding | noncoding | noncoding |
| MSTRG. 137332. 1 |              | XLOC_138303 | 269 coding   | noncoding | noncoding | noncoding |
| NM_001026. 4     | RPS24        | XLOC_138309 | 634 coding   | coding    | coding    | coding    |
| MSTRG. 137474. 1 |              | XLOC_138379 | 215 coding   | noncoding | noncoding | noncoding |
| MSTRG. 137484. 1 |              | XLOC_138380 | 227 coding   | noncoding | noncoding | noncoding |
| NM_001099692. 1  | EIF5AL1      | XLOC_138382 | 3840 coding  | coding    | coding    | coding    |
| MSTRG. 137495. 1 |              | XLOC_138396 | 1077 coding  | noncoding | noncoding | noncoding |
| MSTRG. 137498. 1 |              | XLOC_138398 | 1952 coding  | noncoding | noncoding | noncoding |
| MSTRG. 137503. 1 | BMS1P21      | XLOC_138401 | 257 coding   | noncoding | noncoding | noncoding |
| MSTRG. 137515. 1 | TMEM254-AS1  | XLOC_138410 | 205 coding   | noncoding | noncoding | noncoding |
| MSTRG. 137516. 1 | TMEM254-AS1  | XLOC_138411 | 232 coding   | noncoding | noncoding | noncoding |
| MSTRG. 137518. 1 | TMEM254-AS1  | XLOC_138413 | 298 coding   | noncoding | noncoding | noncoding |
| NM_001270371. 1  | TMEM254      | XLOC_138414 | 2155 coding  | coding    | coding    | noncoding |
| MSTRG. 137511. 1 |              | XLOC_138415 | 264 coding   | noncoding | noncoding | noncoding |
| NM_001012973. 3  | PLAC9        | XLOC_138416 | 776 coding   | coding    | coding    | coding    |
| MSTRG. 137598. 3 | ANXA11       | XLOC_138417 | 11677 coding | coding    | coding    | noncoding |
| MSTRG. 137581. 1 |              | XLOC_138421 | 278 coding   | noncoding | noncoding | noncoding |
| MSTRG. 137620. 1 | LOC105378387 | XLOC_138440 | 272 coding   | noncoding | noncoding | noncoding |
| MSTRG. 137625. 1 |              | XLOC_138445 | 304 coding   | noncoding | noncoding | noncoding |
| MSTRG. 137626. 1 |              | XLOC_138446 | 317 coding   | noncoding | noncoding | noncoding |
| MSTRG. 137628. 1 |              | XLOC_138448 | 220 coding   | noncoding | noncoding | noncoding |
| MSTRG. 137629. 1 |              | XLOC_138449 | 404 coding   | noncoding | noncoding | noncoding |
| MSTRG. 137645. 1 |              | XLOC_138458 | 217 coding   | noncoding | noncoding | noncoding |
| MSTRG. 137685. 1 |              | XLOC_138497 | 266 coding   | noncoding | noncoding | noncoding |
| MSTRG. 137850. 1 | GRID1        | XLOC_138567 | 257 coding   | noncoding | noncoding | noncoding |
| MSTRG. 137852. 1 | GRID1        | XLOC_138568 | 268 coding   | noncoding | noncoding | noncoding |
| MSTRG. 137900. 7 | WAPL         | XLOC_138591 | 1773 coding  | noncoding | coding    | noncoding |
| MSTRG. 137890. 1 |              | XLOC_138594 | 249 coding   | noncoding | noncoding | noncoding |
| MSTRG. 137899. 1 | LDB3         | XLOC_138599 | 233 coding   | noncoding | noncoding | noncoding |
| MSTRG. 137937. 2 | SHLD2        | XLOC_138614 | 4484 coding  | coding    | coding    | coding    |
| NM_019054. 3     | SHLD2        | XLOC_138614 | 3394 coding  | coding    | coding    | coding    |
| NM_001178117. 1  | MINPP1       | XLOC_138639 | 2665 coding  | coding    | coding    | coding    |
| MSTRG. 138039. 1 |              | XLOC_138670 | 234 coding   | noncoding | noncoding | noncoding |
| MSTRG. 138229. 1 | RNLS         | XLOC_138693 | 393 coding   | coding    | noncoding | noncoding |
| MSTRG. 138486. 1 |              | XLOC_138860 | 229 coding   | noncoding | noncoding | noncoding |
| MSTRG. 138492. 1 |              | XLOC_138863 | 236 coding   | noncoding | noncoding | noncoding |

|                  |                |             |              |           |           |           |
|------------------|----------------|-------------|--------------|-----------|-----------|-----------|
| MSTRG. 138519. 1 |                | XLOC_138868 | 238 coding   | noncoding | noncoding | noncoding |
| MSTRG. 138577. 1 | HECTD2-AS1     | XLOC_138934 | 283 coding   | noncoding | noncoding | noncoding |
| MSTRG. 138591. 1 | HECTD2-AS1     | XLOC_138941 | 260 coding   | noncoding | noncoding | noncoding |
| MSTRG. 138600. 1 | HECTD2-AS1     | XLOC_138948 | 284 coding   | noncoding | noncoding | noncoding |
| MSTRG. 138566. 1 |                | XLOC_138952 | 317 coding   | noncoding | noncoding | noncoding |
| MSTRG. 138573. 1 |                | XLOC_138955 | 272 coding   | noncoding | noncoding | noncoding |
| XM_005270185. 4  | TNKS2          | XLOC_138956 | 6122 coding  | coding    | coding    | coding    |
| MSTRG. 138664. 1 | BTA1F1         | XLOC_138972 | 230 coding   | noncoding | noncoding | noncoding |
| MSTRG. 138671. 1 | BTA1F1         | XLOC_138979 | 245 coding   | noncoding | noncoding | noncoding |
| MSTRG. 138678. 1 |                | XLOC_138993 | 249 coding   | noncoding | noncoding | noncoding |
| MSTRG. 138736. 1 |                | XLOC_139040 | 269 coding   | noncoding | noncoding | noncoding |
| MSTRG. 138740. 1 |                | XLOC_139043 | 230 coding   | noncoding | noncoding | noncoding |
| MSTRG. 138821. 1 | TBC1D12        | XLOC_139078 | 261 coding   | noncoding | noncoding | noncoding |
| MSTRG. 138891. 1 | HELLS          | XLOC_139081 | 270 coding   | noncoding | noncoding | noncoding |
| MSTRG. 138893. 1 | HELLS          | XLOC_139083 | 240 coding   | noncoding | noncoding | noncoding |
| MSTRG. 138912. 1 |                | XLOC_139097 | 298 coding   | noncoding | noncoding | noncoding |
| MSTRG. 138915. 1 |                | XLOC_139120 | 209 coding   | noncoding | noncoding | noncoding |
| MSTRG. 138967. 1 | SORBS1         | XLOC_139133 | 280 coding   | noncoding | noncoding | noncoding |
| XM_011540377. 2  | ENTPD1         | XLOC_139141 | 12619 coding | coding    | coding    | coding    |
| MSTRG. 139154. 1 | ENTPD1-AS1     | XLOC_139163 | 245 coding   | noncoding | noncoding | noncoding |
| MSTRG. 139173. 1 | ENTPD1-AS1     | XLOC_139182 | 347 coding   | noncoding | noncoding | noncoding |
| MSTRG. 138980. 1 |                | XLOC_139234 | 245 coding   | noncoding | noncoding | noncoding |
| MSTRG. 138990. 1 | OPALIN         | XLOC_139243 | 322 coding   | noncoding | noncoding | noncoding |
| MSTRG. 139023. 1 |                | XLOC_139250 | 299 coding   | noncoding | noncoding | noncoding |
| MSTRG. 139024. 1 |                | XLOC_139251 | 312 coding   | noncoding | noncoding | noncoding |
| MSTRG. 139108. 1 | SLIT1          | XLOC_139281 | 315 coding   | noncoding | noncoding | noncoding |
| MSTRG. 139116. 1 | ARHGAP19-SLIT1 | XLOC_139286 | 239 coding   | noncoding | noncoding | noncoding |
| MSTRG. 139336. 1 | UBTD1          | XLOC_139306 | 300 coding   | noncoding | noncoding | noncoding |
| MSTRG. 139068. 1 | PI4K2A         | XLOC_139312 | 250 coding   | noncoding | noncoding | noncoding |
| MSTRG. 139061. 1 |                | XLOC_139315 | 240 coding   | noncoding | noncoding | noncoding |
| NM_001010917. 3  | GOLGA7B        | XLOC_139329 | 6843 coding  | coding    | coding    | coding    |
| MSTRG. 139310. 1 | LOC105378449   | XLOC_139356 | 431 coding   | noncoding | noncoding | noncoding |
| MSTRG. 139370. 1 | HPSE2          | XLOC_139368 | 289 coding   | noncoding | noncoding | noncoding |
| MSTRG. 139390. 1 | HPSE2          | XLOC_139379 | 277 coding   | noncoding | noncoding | noncoding |
| MSTRG. 139412. 1 |                | XLOC_139388 | 295 coding   | noncoding | noncoding | noncoding |
| MSTRG. 139459. 1 | CUTC           | XLOC_139395 | 364 coding   | noncoding | noncoding | noncoding |
| MSTRG. 139447. 1 | CPN1           | XLOC_139415 | 244 coding   | noncoding | noncoding | noncoding |
| MSTRG. 139484. 1 |                | XLOC_139426 | 317 coding   | noncoding | noncoding | noncoding |
| MSTRG. 139590. 1 | PDZD7          | XLOC_139459 | 308 coding   | noncoding | noncoding | noncoding |
| MSTRG. 139568. 9 | KAZALD1        | XLOC_139462 | 312 coding   | coding    | noncoding | noncoding |
| MSTRG. 139575. 1 | TLX1NB         | XLOC_139465 | 289 coding   | noncoding | noncoding | noncoding |
| XM_017016872. 1  | BTRC           | XLOC_139473 | 5503 coding  | coding    | coding    | coding    |
| MSTRG. 139608. 1 | BTRC           | XLOC_139486 | 244 coding   | noncoding | noncoding | noncoding |

|                  |              |             |             |           |           |           |
|------------------|--------------|-------------|-------------|-----------|-----------|-----------|
| MSTRG. 139648. 1 | NOLC1        | XLOC_139516 | 291 coding  | noncoding | noncoding | noncoding |
| MSTRG. 139755. 1 | SUFU         | XLOC_139544 | 303 coding  | noncoding | noncoding | noncoding |
| MSTRG. 139905. 1 | BORCS7-ASMT  | XLOC_139568 | 317 coding  | noncoding | noncoding | noncoding |
| MSTRG. 139789. 1 |              | XLOC_139576 | 241 coding  | noncoding | noncoding | noncoding |
| MSTRG. 139793. 1 |              | XLOC_139578 | 265 coding  | noncoding | noncoding | noncoding |
| NM_032727. 4     | INA          | XLOC_139579 | 3251 coding | coding    | coding    | coding    |
| MSTRG. 139810. 1 | NEURL1       | XLOC_139588 | 275 coding  | noncoding | noncoding | noncoding |
| MSTRG. 139850. 1 | SH3PXD2A     | XLOC_139606 | 276 coding  | noncoding | noncoding | noncoding |
| MSTRG. 139851. 1 | SH3PXD2A     | XLOC_139607 | 343 coding  | noncoding | noncoding | noncoding |
| MSTRG. 139861. 1 | SH3PXD2A     | XLOC_139612 | 271 coding  | noncoding | noncoding | noncoding |
| MSTRG. 139894. 1 | CFAP43       | XLOC_139636 | 289 coding  | noncoding | noncoding | noncoding |
| MSTRG. 139950. 1 |              | XLOC_139643 | 280 coding  | noncoding | noncoding | noncoding |
| NM_014978. 3     | SORCS3       | XLOC_139649 | 5575 coding | coding    | coding    | coding    |
| MSTRG. 140117. 1 | SORCS1       | XLOC_139687 | 738 coding  | coding    | noncoding | noncoding |
| MSTRG. 140087. 1 |              | XLOC_139694 | 266 coding  | noncoding | noncoding | noncoding |
| MSTRG. 140102. 1 |              | XLOC_139698 | 263 coding  | noncoding | noncoding | noncoding |
| MSTRG. 140216. 1 |              | XLOC_139708 | 323 coding  | noncoding | noncoding | noncoding |
| MSTRG. 140228. 1 |              | XLOC_139712 | 759 coding  | noncoding | noncoding | noncoding |
| MSTRG. 140133. 1 | LINC01435    | XLOC_139716 | 231 coding  | noncoding | noncoding | noncoding |
| MSTRG. 140144. 1 | LOC105378477 | XLOC_139721 | 314 coding  | noncoding | noncoding | noncoding |
| MSTRG. 140142. 1 |              | XLOC_139723 | 301 coding  | noncoding | noncoding | noncoding |
| MSTRG. 140164. 1 |              | XLOC_139730 | 266 coding  | coding    | noncoding | noncoding |
| MSTRG. 140165. 1 |              | XLOC_139731 | 280 coding  | noncoding | noncoding | noncoding |
| MSTRG. 140167. 1 |              | XLOC_139732 | 246 coding  | noncoding | noncoding | noncoding |
| MSTRG. 140171. 1 |              | XLOC_139733 | 269 coding  | noncoding | noncoding | noncoding |
| MSTRG. 140237. 1 |              | XLOC_139734 | 296 coding  | noncoding | noncoding | noncoding |
| MSTRG. 140235. 1 |              | XLOC_139736 | 260 coding  | noncoding | noncoding | noncoding |
| NM_004419. 4     | DUSP5        | XLOC_139795 | 2477 coding | coding    | coding    | coding    |
| MSTRG. 140353. 1 | LOC105378483 | XLOC_139799 | 448 coding  | noncoding | noncoding | noncoding |
| MSTRG. 140357. 1 | SMC3         | XLOC_139801 | 292 coding  | noncoding | noncoding | noncoding |
| MSTRG. 140331. 1 |              | XLOC_139803 | 483 coding  | noncoding | noncoding | noncoding |
| NM_001324337. 1  | SHOC2        | XLOC_139812 | 4132 coding | coding    | coding    | coding    |
| NM_001269039. 2  | SHOC2        | XLOC_139812 | 3809 coding | coding    | coding    | coding    |
| MSTRG. 140360. 1 |              | XLOC_139823 | 233 coding  | noncoding | noncoding | noncoding |
| MSTRG. 140365. 1 |              | XLOC_139825 | 292 coding  | noncoding | noncoding | noncoding |
| MSTRG. 140388. 1 |              | XLOC_139833 | 273 coding  | noncoding | noncoding | noncoding |
| MSTRG. 140397. 1 |              | XLOC_139836 | 274 coding  | coding    | noncoding | noncoding |
| MSTRG. 140406. 1 |              | XLOC_139842 | 390 coding  | noncoding | coding    | noncoding |
| MSTRG. 140421. 1 | LOC105378486 | XLOC_139847 | 204 coding  | noncoding | noncoding | noncoding |
| MSTRG. 140435. 1 | LOC105378486 | XLOC_139855 | 309 coding  | noncoding | coding    | noncoding |
| MSTRG. 140437. 1 |              | XLOC_139869 | 486 coding  | noncoding | noncoding | noncoding |
| NM_016234. 3     | ACSL5        | XLOC_139874 | 3354 coding | coding    | coding    | coding    |
| MSTRG. 140474. 1 |              | XLOC_139948 | 229 coding  | noncoding | noncoding | noncoding |

|                   |              |             |              |           |           |           |
|-------------------|--------------|-------------|--------------|-----------|-----------|-----------|
| MSTRG. 140478. 1  | LOC107984158 | XLOC_139950 | 241 coding   | noncoding | noncoding | noncoding |
| MSTRG. 140590. 1  |              | XLOC_139975 | 204 coding   | noncoding | noncoding | noncoding |
| MSTRG. 140524. 1  | NRAP         | XLOC_139989 | 257 coding   | coding    | noncoding | noncoding |
| XM_011539769. 3   | NHLRC2       | XLOC_139999 | 2181 coding  | coding    | coding    | coding    |
| MSTRG. 140548. 1  |              | XLOC_140011 | 248 coding   | noncoding | noncoding | noncoding |
| MSTRG. 140814. 2  | ABLIM1       | XLOC_140029 | 8227 coding  | coding    | noncoding | noncoding |
| MSTRG. 140618. 1  | FAM160B1     | XLOC_140042 | 209 coding   | coding    | noncoding | noncoding |
| MSTRG. 140717. 1  | LOC107984272 | XLOC_140052 | 238 coding   | noncoding | noncoding | noncoding |
| MSTRG. 140719. 1  | LOC107984272 | XLOC_140053 | 313 coding   | noncoding | noncoding | noncoding |
| MSTRG. 140721. 1  | LOC107984272 | XLOC_140055 | 247 coding   | noncoding | noncoding | noncoding |
| MSTRG. 140779. 1  | ATRNL1       | XLOC_140061 | 271 coding   | noncoding | noncoding | noncoding |
| MSTRG. 140784. 1  | ATRNL1       | XLOC_140062 | 298 coding   | noncoding | noncoding | noncoding |
| MSTRG. 140786. 1  | ATRNL1       | XLOC_140063 | 220 coding   | noncoding | noncoding | noncoding |
| MSTRG. 140787. 1  | ATRNL1       | XLOC_140064 | 244 coding   | noncoding | noncoding | noncoding |
| MSTRG. 140736. 1  |              | XLOC_140078 | 266 coding   | noncoding | noncoding | noncoding |
| MSTRG. 140834. 1  | C10orf82     | XLOC_140097 | 229 coding   | noncoding | noncoding | noncoding |
| XM_011539797. 3   | ENO4         | XLOC_140104 | 7224 coding  | coding    | coding    | coding    |
| MSTRG. 140858. 1  | SHTN1        | XLOC_140108 | 206 coding   | noncoding | noncoding | noncoding |
| MSTRG. 140901. 3  | PDZD8        | XLOC_140112 | 3608 coding  | coding    | coding    | noncoding |
| MSTRG. 140868. 1  |              | XLOC_140121 | 273 coding   | noncoding | noncoding | noncoding |
| MSTRG. 140883. 1  |              | XLOC_140130 | 264 coding   | noncoding | noncoding | noncoding |
| MSTRG. 140888. 1  |              | XLOC_140132 | 280 coding   | noncoding | noncoding | noncoding |
| MSTRG. 140985. 1  |              | XLOC_140167 | 309 coding   | noncoding | noncoding | noncoding |
| MSTRG. 140986. 1  |              | XLOC_140168 | 286 coding   | noncoding | noncoding | noncoding |
| MSTRG. 140997. 1  |              | XLOC_140174 | 252 coding   | noncoding | noncoding | noncoding |
| XM_017016263. 1   | FAM45A       | XLOC_140180 | 2913 coding  | coding    | coding    | coding    |
| MSTRG. 141103. 11 | INPP5F       | XLOC_140209 | 231 coding   | coding    | noncoding | noncoding |
| MSTRG. 141066. 1  |              | XLOC_140213 | 234 coding   | noncoding | noncoding | noncoding |
| MSTRG. 141068. 1  |              | XLOC_140214 | 319 coding   | noncoding | noncoding | noncoding |
| MSTRG. 141075. 1  |              | XLOC_140217 | 310 coding   | noncoding | noncoding | noncoding |
| MSTRG. 141083. 1  | LOC105378515 | XLOC_140221 | 289 coding   | noncoding | noncoding | noncoding |
| NM_001318168. 1   | PLPP4        | XLOC_140225 | 1250 coding  | coding    | noncoding | noncoding |
| XR_428707. 3      | WDR11        | XLOC_140234 | 4422 coding  | noncoding | coding    | coding    |
| MSTRG. 141214. 10 | WDR11        | XLOC_140234 | 4156 coding  | noncoding | coding    | coding    |
| MSTRG. 141217. 1  | WDR11        | XLOC_140237 | 224 coding   | coding    | noncoding | noncoding |
| MSTRG. 141130. 1  | LOC105378521 | XLOC_140242 | 438 coding   | noncoding | noncoding | noncoding |
| MSTRG. 141133. 1  | LOC105378522 | XLOC_140245 | 383 coding   | coding    | noncoding | noncoding |
| MSTRG. 141155. 1  |              | XLOC_140257 | 292 coding   | noncoding | noncoding | noncoding |
| MSTRG. 141169. 1  |              | XLOC_140276 | 236 coding   | noncoding | noncoding | noncoding |
| MSTRG. 141265. 1  | ATE1-AS1     | XLOC_140284 | 278 coding   | noncoding | noncoding | noncoding |
| XM_024447757. 1   | TACC2        | XLOC_140289 | 10173 coding | coding    | noncoding | coding    |
| MSTRG. 141249. 1  | HTRA1        | XLOC_140306 | 336 coding   | noncoding | noncoding | noncoding |
| XM_006717660. 3   | DMBT1        | XLOC_140309 | 8013 coding  | coding    | coding    | coding    |

|                   |              |             |              |           |           |           |
|-------------------|--------------|-------------|--------------|-----------|-----------|-----------|
| MSTRG. 141287. 1  |              | XLOC_140312 | 227 coding   | noncoding | noncoding | noncoding |
| MSTRG. 141283. 1  |              | XLOC_140316 | 495 coding   | noncoding | noncoding | noncoding |
| NM_153442. 4      | GPR26        | XLOC_140363 | 10306 coding | coding    | coding    | coding    |
| MSTRG. 141366. 1  |              | XLOC_140382 | 276 coding   | noncoding | noncoding | noncoding |
| XM_011540058. 3   | LHPP         | XLOC_140387 | 4081 coding  | coding    | coding    | coding    |
| MSTRG. 141544. 1  | FAM53B       | XLOC_140392 | 7700 coding  | noncoding | coding    | noncoding |
| XM_017015986. 1   | ABRAXAS2     | XLOC_140401 | 2870 coding  | noncoding | coding    | coding    |
| MSTRG. 141525. 1  |              | XLOC_140403 | 256 coding   | noncoding | noncoding | noncoding |
| XM_006717907. 2   | ZRANB1       | XLOC_140405 | 5661 coding  | coding    | coding    | coding    |
| MSTRG. 141575. 1  |              | XLOC_140408 | 266 coding   | noncoding | noncoding | noncoding |
| MSTRG. 141587. 1  |              | XLOC_140414 | 307 coding   | noncoding | noncoding | noncoding |
| MSTRG. 141627. 1  | MMP21        | XLOC_140436 | 273 coding   | coding    | noncoding | noncoding |
| MSTRG. 141682. 1  | ADAM12       | XLOC_140450 | 222 coding   | noncoding | noncoding | noncoding |
| MSTRG. 141692. 1  | ADAM12       | XLOC_140459 | 240 coding   | noncoding | noncoding | noncoding |
| MSTRG. 141666. 1  | C10orf90     | XLOC_140494 | 278 coding   | noncoding | noncoding | noncoding |
| MSTRG. 141669. 1  | C10orf90     | XLOC_140496 | 217 coding   | noncoding | noncoding | noncoding |
| MSTRG. 141782. 1  | DOCK1        | XLOC_140516 | 223 coding   | noncoding | noncoding | noncoding |
| MSTRG. 141732. 1  |              | XLOC_140517 | 245 coding   | noncoding | noncoding | noncoding |
| MSTRG. 141733. 1  |              | XLOC_140518 | 280 coding   | noncoding | noncoding | noncoding |
| MSTRG. 141752. 1  | CLRN3        | XLOC_140533 | 305 coding   | noncoding | noncoding | noncoding |
| MSTRG. 141844. 1  |              | XLOC_140566 | 354 coding   | noncoding | noncoding | noncoding |
| MSTRG. 142045. 1  |              | XLOC_140667 | 380 coding   | noncoding | noncoding | noncoding |
| MSTRG. 142053. 1  |              | XLOC_140675 | 223 coding   | noncoding | noncoding | noncoding |
| MSTRG. 142109. 1  |              | XLOC_140700 | 285 coding   | noncoding | noncoding | noncoding |
| NM_001321042. 1   | INPP5A       | XLOC_140704 | 3061 coding  | coding    | coding    | coding    |
| MSTRG. 142159. 1  | CFAP46       | XLOC_140727 | 227 coding   | noncoding | noncoding | noncoding |
| NM_001083909. 2   | ADGRA1       | XLOC_140740 | 4184 coding  | coding    | coding    | coding    |
| NM_152643. 8      | KNDC1        | XLOC_140744 | 7021 coding  | coding    | coding    | coding    |
| MSTRG. 142214. 1  |              | XLOC_140755 | 222 coding   | noncoding | noncoding | noncoding |
| NR_149718. 1      | SCART1       | XLOC_140768 | 4315 coding  | coding    | coding    | coding    |
| MSTRG. 142225. 1  |              | XLOC_140774 | 304 coding   | noncoding | noncoding | noncoding |
| MSTRG. 142227. 1  | FRG2B        | XLOC_140775 | 400 coding   | noncoding | noncoding | noncoding |
| MSTRG. 131635. 1  |              | XLOC_140795 | 322 coding   | noncoding | noncoding | noncoding |
| MSTRG. 131813. 1  | LOC107984285 | XLOC_140812 | 244 coding   | noncoding | noncoding | noncoding |
| NM_001317956. 2   | IDH1         | XLOC_140816 | 3373 coding  | coding    | coding    | coding    |
| MSTRG. 131826. 14 | WDR37        | XLOC_140816 | 1312 coding  | coding    | noncoding | noncoding |
| MSTRG. 131718. 1  |              | XLOC_140839 | 257 coding   | noncoding | noncoding | noncoding |
| MSTRG. 131807. 1  | LOC105376352 | XLOC_140869 | 310 coding   | noncoding | noncoding | noncoding |
| XR_001747000. 1   | PITRM1       | XLOC_140872 | 3657 coding  | coding    | coding    | coding    |
| MSTRG. 131836. 1  |              | XLOC_140880 | 225 coding   | noncoding | noncoding | noncoding |
| MSTRG. 131882. 1  | LOC105376360 | XLOC_140904 | 263 coding   | noncoding | noncoding | noncoding |
| MSTRG. 131899. 1  |              | XLOC_140914 | 270 coding   | noncoding | noncoding | noncoding |
| MSTRG. 131990. 1  |              | XLOC_140952 | 288 coding   | noncoding | noncoding | noncoding |

|                 |                 |             |              |           |           |           |
|-----------------|-----------------|-------------|--------------|-----------|-----------|-----------|
| NR_037164.1     | ASB13           | XLOC_140991 | 2808 coding  | coding    | coding    | coding    |
| NM_001115156.1  | GDI2            | XLOC_140993 | 2277 coding  | coding    | coding    | coding    |
| MSTRG.132083.1  |                 | XLOC_140997 | 221 coding   | noncoding | noncoding | noncoding |
| MSTRG.132085.1  |                 | XLOC_140998 | 259 coding   | noncoding | noncoding | noncoding |
| NM_019046.3     | ANKRD16         | XLOC_141000 | 2734 coding  | coding    | coding    | coding    |
| NM_001351096.1  | IL15RA          | XLOC_141003 | 1823 coding  | noncoding | coding    | coding    |
| MSTRG.132126.1  | LOC101928080    | XLOC_141013 | 299 coding   | noncoding | noncoding | noncoding |
| MSTRG.132497.4  | PFKFB3          | XLOC_141014 | 2561 coding  | coding    | coding    | coding    |
| NM_001242413.2  | PRKCQ           | XLOC_141020 | 3096 coding  | coding    | coding    | coding    |
| MSTRG.132224.1  | ITIH5           | XLOC_141081 | 253 coding   | noncoding | noncoding | noncoding |
| MSTRG.132226.1  | ITIH5           | XLOC_141082 | 225 coding   | noncoding | noncoding | noncoding |
| MSTRG.132276.1  |                 | XLOC_141102 | 276 coding   | coding    | noncoding | noncoding |
| MSTRG.132439.1  |                 | XLOC_141130 | 274 coding   | noncoding | noncoding | noncoding |
| MSTRG.132435.1  | LOC101928272    | XLOC_141139 | 255 coding   | noncoding | noncoding | noncoding |
| MSTRG.132438.1  |                 | XLOC_141142 | 284 coding   | noncoding | noncoding | noncoding |
| MSTRG.132464.1  | LINC02663       | XLOC_141144 | 209 coding   | noncoding | noncoding | noncoding |
| MSTRG.132469.1  | LINC02663       | XLOC_141147 | 232 coding   | noncoding | noncoding | noncoding |
| MSTRG.132460.1  |                 | XLOC_141154 | 243 coding   | noncoding | noncoding | noncoding |
| MSTRG.132488.1  |                 | XLOC_141160 | 234 coding   | noncoding | noncoding | noncoding |
| MSTRG.132495.1  | CELF2-DT        | XLOC_141166 | 373 coding   | noncoding | noncoding | noncoding |
| MSTRG.132656.1  | CELF2           | XLOC_141168 | 262 coding   | noncoding | noncoding | noncoding |
| MSTRG.132667.1  | CELF2           | XLOC_141174 | 273 coding   | noncoding | noncoding | noncoding |
| MSTRG.132684.21 | CELF2           | XLOC_141185 | 2226 coding  | coding    | coding    | noncoding |
| MSTRG.132575.1  |                 | XLOC_141210 | 231 coding   | noncoding | noncoding | noncoding |
| MSTRG.132591.1  | PROSER2         | XLOC_141219 | 262 coding   | noncoding | noncoding | noncoding |
| MSTRG.132620.1  | UPF2            | XLOC_141227 | 234 coding   | noncoding | noncoding | noncoding |
| MSTRG.132623.1  | UPF2            | XLOC_141230 | 256 coding   | noncoding | noncoding | noncoding |
| MSTRG.132596.1  |                 | XLOC_141236 | 283 coding   | noncoding | noncoding | noncoding |
| MSTRG.132876.6  | CAMK1D          | XLOC_141249 | 3735 coding  | coding    | coding    | coding    |
| MSTRG.132881.2  | CAMK1D          | XLOC_141250 | 2574 coding  | noncoding | coding    | noncoding |
| MSTRG.132741.1  | CCDC3           | XLOC_141268 | 244 coding   | noncoding | noncoding | noncoding |
| MSTRG.132743.1  | CCDC3           | XLOC_141269 | 386 coding   | coding    | noncoding | noncoding |
| MSTRG.132749.10 | OPTN            | XLOC_141271 | 2891 coding  | coding    | coding    | coding    |
| MSTRG.132749.12 | OPTN            | XLOC_141271 | 2176 coding  | coding    | noncoding | noncoding |
| MSTRG.132643.1  |                 | XLOC_141279 | 300 coding   | noncoding | noncoding | noncoding |
| MSTRG.132644.1  | PHYH            | XLOC_141280 | 244 coding   | noncoding | noncoding | noncoding |
| MSTRG.132728.1  | LOC105376419    | XLOC_141288 | 302 coding   | noncoding | noncoding | noncoding |
| MSTRG.132799.1  | FRMD4A          | XLOC_141300 | 22715 coding | coding    | coding    | coding    |
| MSTRG.132862.1  | FAM107B         | XLOC_141332 | 291 coding   | noncoding | noncoding | noncoding |
| MSTRG.133044.1  | ACBD7-DCLRE1CP1 | XLOC_141345 | 300 coding   | noncoding | noncoding | noncoding |
| MSTRG.132976.1  | FAM171A1        | XLOC_141361 | 228 coding   | noncoding | noncoding | noncoding |
| MSTRG.132980.1  | FAM171A1        | XLOC_141362 | 302 coding   | noncoding | noncoding | noncoding |
| MSTRG.132972.1  |                 | XLOC_141366 | 346 coding   | noncoding | noncoding | noncoding |

|                   |              |             |             |           |           |           |
|-------------------|--------------|-------------|-------------|-----------|-----------|-----------|
| MSTRG. 132991. 1  | ITGA8        | XLOC_141368 | 310 coding  | noncoding | noncoding | noncoding |
| MSTRG. 132988. 1  |              | XLOC_141373 | 414 coding  | noncoding | noncoding | noncoding |
| MSTRG. 133065. 1  |              | XLOC_141397 | 214 coding  | noncoding | noncoding | noncoding |
| MSTRG. 133056. 1  |              | XLOC_141399 | 237 coding  | noncoding | noncoding | noncoding |
| XM_005252552. 4   | RSU1         | XLOC_141412 | 3456 coding | coding    | coding    | coding    |
| MSTRG. 133136. 1  | CUBN         | XLOC_141432 | 273 coding  | noncoding | noncoding | noncoding |
| MSTRG. 133148. 1  | CUBN         | XLOC_141436 | 729 coding  | noncoding | noncoding | noncoding |
| MSTRG. 133154. 1  |              | XLOC_141448 | 201 coding  | noncoding | noncoding | noncoding |
| MSTRG. 133205. 1  | ST8SIA6-AS1  | XLOC_141456 | 272 coding  | noncoding | noncoding | noncoding |
| MSTRG. 133158. 1  |              | XLOC_141462 | 313 coding  | noncoding | noncoding | noncoding |
| MSTRG. 133161. 1  |              | XLOC_141464 | 437 coding  | noncoding | noncoding | noncoding |
| MSTRG. 133261. 1  |              | XLOC_141481 | 289 coding  | noncoding | noncoding | noncoding |
| MSTRG. 133344. 1  | CACNB2       | XLOC_141490 | 282 coding  | noncoding | noncoding | noncoding |
| MSTRG. 133347. 1  | CACNB2       | XLOC_141491 | 235 coding  | noncoding | noncoding | noncoding |
| MSTRG. 133372. 1  | NSUN6        | XLOC_141499 | 239 coding  | noncoding | noncoding | noncoding |
| MSTRG. 133270. 1  | LOC105376440 | XLOC_141504 | 360 coding  | noncoding | noncoding | noncoding |
| MSTRG. 133274. 1  | LOC105376440 | XLOC_141505 | 407 coding  | noncoding | noncoding | noncoding |
| MSTRG. 133267. 1  |              | XLOC_141507 | 324 coding  | coding    | noncoding | noncoding |
| MSTRG. 133286. 1  | MALRD1       | XLOC_141510 | 214 coding  | noncoding | noncoding | noncoding |
| MSTRG. 133442. 8  | PLXDC2       | XLOC_141527 | 3299 coding | noncoding | noncoding | noncoding |
| MSTRG. 133319. 1  |              | XLOC_141541 | 270 coding  | noncoding | noncoding | noncoding |
| MSTRG. 133320. 1  |              | XLOC_141542 | 203 coding  | coding    | noncoding | noncoding |
| MSTRG. 133332. 1  |              | XLOC_141547 | 242 coding  | noncoding | noncoding | noncoding |
| MSTRG. 133334. 1  |              | XLOC_141548 | 311 coding  | noncoding | noncoding | noncoding |
| MSTRG. 133411. 1  | NEBL         | XLOC_141553 | 272 coding  | noncoding | noncoding | noncoding |
| MSTRG. 133423. 1  | NEBL         | XLOC_141557 | 259 coding  | noncoding | noncoding | noncoding |
| MSTRG. 133384. 1  |              | XLOC_141564 | 246 coding  | noncoding | noncoding | noncoding |
| MSTRG. 133386. 1  |              | XLOC_141565 | 301 coding  | noncoding | noncoding | noncoding |
| MSTRG. 133392. 1  |              | XLOC_141568 | 289 coding  | noncoding | noncoding | noncoding |
| MSTRG. 133401. 1  |              | XLOC_141571 | 259 coding  | noncoding | noncoding | noncoding |
| MSTRG. 133406. 1  |              | XLOC_141574 | 243 coding  | noncoding | noncoding | noncoding |
| XM_017016226. 2   | SKIDA1       | XLOC_141577 | 9225 coding | coding    | coding    | coding    |
| MSTRG. 133510. 11 | MLLT10       | XLOC_141579 | 4561 coding | coding    | noncoding | coding    |
| MSTRG. 133651. 1  | DNAJC1       | XLOC_141589 | 231 coding  | noncoding | noncoding | noncoding |
| MSTRG. 133487. 1  |              | XLOC_141604 | 310 coding  | noncoding | noncoding | noncoding |
| MSTRG. 133496. 1  |              | XLOC_141616 | 244 coding  | noncoding | noncoding | noncoding |
| MSTRG. 133575. 7  | PIP4K2A      | XLOC_141631 | 1435 coding | coding    | coding    | coding    |
| MSTRG. 133567. 1  |              | XLOC_141638 | 284 coding  | noncoding | noncoding | noncoding |
| MSTRG. 133584. 1  | ARMC3        | XLOC_141641 | 853 coding  | noncoding | noncoding | noncoding |
| MSTRG. 133614. 1  | C10orf67     | XLOC_141653 | 322 coding  | noncoding | noncoding | noncoding |
| MSTRG. 133682. 1  | KIAA1217     | XLOC_141675 | 253 coding  | noncoding | noncoding | noncoding |
| MSTRG. 133684. 1  | KIAA1217     | XLOC_141676 | 272 coding  | noncoding | noncoding | noncoding |
| MSTRG. 133687. 1  | KIAA1217     | XLOC_141677 | 280 coding  | noncoding | noncoding | noncoding |

|                   |              |             |             |           |           |           |
|-------------------|--------------|-------------|-------------|-----------|-----------|-----------|
| MSTRG. 133707. 1  | KIAA1217     | XLOC_141687 | 279 coding  | noncoding | noncoding | noncoding |
| MSTRG. 133712. 1  | ARHGAP21     | XLOC_141691 | 261 coding  | noncoding | noncoding | noncoding |
| NM_145010. 4      | ENKUR        | XLOC_141716 | 3378 coding | coding    | coding    | coding    |
| MSTRG. 133716. 1  |              | XLOC_141724 | 451 coding  | noncoding | noncoding | noncoding |
| MSTRG. 133719. 1  |              | XLOC_141726 | 399 coding  | noncoding | noncoding | noncoding |
| MSTRG. 133732. 1  | GPR158       | XLOC_141730 | 304 coding  | noncoding | noncoding | noncoding |
| MSTRG. 133734. 1  | GPR158       | XLOC_141731 | 391 coding  | coding    | noncoding | noncoding |
| MSTRG. 133735. 1  | GPR158       | XLOC_141732 | 283 coding  | noncoding | noncoding | noncoding |
| MSTRG. 133723. 1  |              | XLOC_141739 | 259 coding  | noncoding | noncoding | noncoding |
| MSTRG. 133783. 1  | MYO3A        | XLOC_141744 | 236 coding  | noncoding | noncoding | noncoding |
| MSTRG. 133785. 1  | MYO3A        | XLOC_141745 | 219 coding  | noncoding | noncoding | noncoding |
| NM_001178125. 1   | ABII         | XLOC_141765 | 3188 coding | coding    | coding    | coding    |
| NM_001348034. 1   | ABII         | XLOC_141765 | 3548 coding | coding    | coding    | coding    |
| MSTRG. 133821. 1  |              | XLOC_141777 | 303 coding  | noncoding | noncoding | noncoding |
| XM_017015930. 1   | ANKRD26      | XLOC_141779 | 8813 coding | coding    | coding    | coding    |
| MSTRG. 133858. 1  | ANKRD26      | XLOC_141780 | 460 coding  | noncoding | noncoding | noncoding |
| MSTRG. 133900. 1  |              | XLOC_141819 | 309 coding  | noncoding | noncoding | noncoding |
| MSTRG. 133910. 1  | MKX          | XLOC_141823 | 297 coding  | noncoding | noncoding | noncoding |
| MSTRG. 133907. 1  |              | XLOC_141827 | 251 coding  | noncoding | noncoding | noncoding |
| MSTRG. 133960. 1  | ARMC4        | XLOC_141829 | 283 coding  | noncoding | noncoding | noncoding |
| MSTRG. 134048. 1  | MPP7         | XLOC_141842 | 251 coding  | noncoding | noncoding | noncoding |
| MSTRG. 133966. 1  |              | XLOC_141865 | 249 coding  | noncoding | noncoding | noncoding |
| MSTRG. 134077. 12 | WAC          | XLOC_141870 | 3777 coding | coding    | coding    | noncoding |
| MSTRG. 133983. 1  |              | XLOC_141875 | 310 coding  | noncoding | noncoding | noncoding |
| MSTRG. 133989. 1  |              | XLOC_141876 | 259 coding  | noncoding | noncoding | noncoding |
| MSTRG. 133993. 1  | LINC01517    | XLOC_141877 | 320 coding  | noncoding | noncoding | noncoding |
| MSTRG. 133996. 1  | LINC01517    | XLOC_141879 | 306 coding  | noncoding | noncoding | noncoding |
| MSTRG. 134084. 1  |              | XLOC_141943 | 261 coding  | noncoding | noncoding | noncoding |
| MSTRG. 134101. 1  |              | XLOC_141953 | 250 coding  | noncoding | noncoding | noncoding |
| MSTRG. 134132. 1  |              | XLOC_141969 | 240 coding  | noncoding | noncoding | noncoding |
| MSTRG. 134265. 1  | ZNF438       | XLOC_141999 | 395 coding  | noncoding | noncoding | noncoding |
| MSTRG. 134297. 1  | LOC105376481 | XLOC_142017 | 224 coding  | noncoding | noncoding | noncoding |
| MSTRG. 134299. 1  | LOC105376481 | XLOC_142019 | 277 coding  | noncoding | noncoding | noncoding |
| MSTRG. 134330. 22 | ZEB1         | XLOC_142023 | 4179 coding | coding    | noncoding | noncoding |
| XM_017016224. 2   | KIF5B        | XLOC_142059 | 5255 coding | coding    | coding    | coding    |
| MSTRG. 134321. 1  |              | XLOC_142071 | 541 coding  | noncoding | noncoding | noncoding |
| MSTRG. 134327. 1  |              | XLOC_142076 | 231 coding  | noncoding | noncoding | noncoding |
| MSTRG. 134328. 1  |              | XLOC_142077 | 300 coding  | noncoding | noncoding | noncoding |
| MSTRG. 134747. 1  | CCDC7        | XLOC_142103 | 496 coding  | noncoding | noncoding | noncoding |
| MSTRG. 134773. 1  | CCDC7        | XLOC_142128 | 269 coding  | noncoding | noncoding | noncoding |
| MSTRG. 134433. 1  | NRP1         | XLOC_142165 | 271 coding  | noncoding | noncoding | noncoding |
| MSTRG. 134437. 1  |              | XLOC_142179 | 298 coding  | noncoding | noncoding | noncoding |
| MSTRG. 134449. 1  |              | XLOC_142198 | 230 coding  | noncoding | noncoding | noncoding |

|                  |              |                   |             |           |           |           |
|------------------|--------------|-------------------|-------------|-----------|-----------|-----------|
| MSTRG. 134492. 1 | CUL2         | XLOC_142203       | 243 coding  | noncoding | noncoding | noncoding |
| MSTRG. 134575. 1 | CCNY         | XLOC_142226       | 309 coding  | noncoding | noncoding | noncoding |
| MSTRG. 134524. 1 |              | XLOC_142233       | 232 coding  | noncoding | noncoding | noncoding |
| MSTRG. 134523. 1 |              | XLOC_142237       | 317 coding  | noncoding | noncoding | noncoding |
| MSTRG. 134538. 1 | LINC02630    | XLOC_142242       | 296 coding  | noncoding | noncoding | noncoding |
| MSTRG. 134552. 1 |              | XLOC_142248       | 259 coding  | noncoding | noncoding | noncoding |
| MSTRG. 134557. 1 |              | XLOC_142251       | 300 coding  | noncoding | noncoding | noncoding |
| MSTRG. 134559. 1 |              | XLOC_142253       | 217 coding  | noncoding | noncoding | noncoding |
| MSTRG. 134560. 1 |              | XLOC_142254       | 233 coding  | noncoding | noncoding | noncoding |
| MSTRG. 134657. 1 | ANKRD30A     | XLOC_142262       | 261 coding  | noncoding | noncoding | noncoding |
| MSTRG. 134641. 1 |              | XLOC_142269       | 274 coding  | noncoding | noncoding | noncoding |
| MSTRG. 134662. 1 |              | XLOC_142280       | 273 coding  | noncoding | noncoding | noncoding |
| MSTRG. 134969. 1 | ZNF33B       | XLOC_142350       | 226 coding  | noncoding | noncoding | noncoding |
| MSTRG. 134973. 1 | ZNF33B       | XLOC_142353       | 210 coding  | noncoding | noncoding | noncoding |
| MSTRG. 134953. 1 |              | XLOC_142356       | 467 coding  | noncoding | noncoding | noncoding |
| MSTRG. 134955. 1 |              | XLOC_142359       | 223 coding  | noncoding | noncoding | noncoding |
| MSTRG. 134962. 1 | LOC105378269 | XLOC_142362       | 312 coding  | noncoding | noncoding | noncoding |
| MSTRG. 134975. 1 |              | XLOC_142365       | 501 coding  | noncoding | noncoding | noncoding |
| MSTRG. 134994. 7 | CSGALNACT2   | XLOC_142374       | 3095 coding | coding    | coding    | noncoding |
| MSTRG. 135005. 1 |              | XLOC_142384       | 285 coding  | noncoding | noncoding | noncoding |
| MSTRG. 135026. 1 |              | XLOC_142389       | 312 coding  | noncoding | noncoding | noncoding |
| MSTRG. 135031. 1 |              | XLOC_142395       | 301 coding  | noncoding | noncoding | noncoding |
| NM_001324166. 1  | ZNF32        | XLOC_142411       | 1167 coding | coding    | coding    | coding    |
| MSTRG. 135100. 1 |              | XLOC_142432       | 290 coding  | noncoding | noncoding | noncoding |
| XR_001747171. 1  | CXCL12       | XLOC_142435       | 5604 coding | coding    | coding    | noncoding |
| NM_001282866. 2  |              | 8-Mar XLOC_142464 | 5615 coding | coding    | coding    | coding    |
| MSTRG. 135481. 9 | PARGP1-AGAP4 | XLOC_142480       | 540 coding  | noncoding | coding    | noncoding |
| MSTRG. 135530. 6 | LOC107984026 | XLOC_142490       | 855 coding  | coding    | noncoding | noncoding |
| MSTRG. 135215. 1 |              | XLOC_142519       | 246 coding  | noncoding | noncoding | noncoding |
| MSTRG. 135216. 1 |              | XLOC_142520       | 276 coding  | coding    | noncoding | noncoding |
| MSTRG. 135305. 1 | ARHGAP22     | XLOC_142551       | 272 coding  | noncoding | noncoding | noncoding |
| XM_011539829. 2  | LRRIC18      | XLOC_142557       | 2932 coding | coding    | coding    | coding    |
| MSTRG. 135332. 1 |              | XLOC_142564       | 390 coding  | noncoding | noncoding | noncoding |
| XM_017015828. 1  | VSTM4        | XLOC_142566       | 6781 coding | noncoding | coding    | coding    |
| MSTRG. 135340. 1 |              | XLOC_142578       | 314 coding  | coding    | noncoding | noncoding |
| MSTRG. 135385. 1 |              | XLOC_142580       | 238 coding  | noncoding | noncoding | noncoding |
| MSTRG. 135379. 1 |              | XLOC_142596       | 626 coding  | noncoding | noncoding | noncoding |
| MSTRG. 135380. 1 |              | XLOC_142597       | 295 coding  | noncoding | noncoding | noncoding |
| MSTRG. 135577. 1 |              | XLOC_142678       | 635 coding  | coding    | coding    | noncoding |
| MSTRG. 135579. 1 |              | XLOC_142679       | 263 coding  | coding    | noncoding | noncoding |
| MSTRG. 135668. 1 | PRKG1        | XLOC_142697       | 289 coding  | noncoding | noncoding | noncoding |
| MSTRG. 135670. 1 | PRKG1        | XLOC_142698       | 248 coding  | noncoding | noncoding | noncoding |
| MSTRG. 135677. 1 | PRKG1        | XLOC_142701       | 323 coding  | noncoding | noncoding | noncoding |

|                   |              |             |              |           |           |           |
|-------------------|--------------|-------------|--------------|-----------|-----------|-----------|
| MSTRG. 135697. 1  | PRKG1        | XLOC_142710 | 291 coding   | noncoding | noncoding | noncoding |
| MSTRG. 135612. 1  |              | XLOC_142738 | 268 coding   | noncoding | noncoding | noncoding |
| MSTRG. 135617. 1  | LOC105378307 | XLOC_142747 | 323 coding   | noncoding | noncoding | noncoding |
| MSTRG. 135621. 1  | LOC105378306 | XLOC_142749 | 237 coding   | noncoding | noncoding | noncoding |
| MSTRG. 135625. 1  |              | XLOC_142753 | 219 coding   | noncoding | noncoding | noncoding |
| XR_945967. 2      | LOC105378308 | XLOC_142755 | 8270 coding  | coding    | coding    | coding    |
| MSTRG. 135640. 1  | LOC105378308 | XLOC_142756 | 278 coding   | noncoding | noncoding | noncoding |
| XR_001747192. 2   | PCDH15       | XLOC_142765 | 15323 coding | coding    | coding    | coding    |
| MSTRG. 135818. 1  | PCDH15       | XLOC_142770 | 253 coding   | noncoding | noncoding | noncoding |
| MSTRG. 135823. 1  | PCDH15       | XLOC_142774 | 218 coding   | noncoding | noncoding | noncoding |
| MSTRG. 135832. 1  | PCDH15       | XLOC_142780 | 228 coding   | noncoding | noncoding | noncoding |
| MSTRG. 135834. 1  | PCDH15       | XLOC_142782 | 247 coding   | noncoding | noncoding | noncoding |
| MSTRG. 135857. 1  | PCDH15       | XLOC_142791 | 274 coding   | noncoding | noncoding | noncoding |
| MSTRG. 135746. 1  |              | XLOC_142806 | 321 coding   | noncoding | noncoding | noncoding |
| MSTRG. 135897. 1  |              | XLOC_142845 | 283 coding   | noncoding | noncoding | noncoding |
| MSTRG. 135944. 3  | TFAM         | XLOC_142867 | 4793 coding  | coding    | noncoding | noncoding |
| NR_131782. 1      | CCEPR        | XLOC_142889 | 2502 coding  | noncoding | noncoding | noncoding |
| MSTRG. 136006. 1  | PHYHIPL      | XLOC_142890 | 239 coding   | noncoding | noncoding | noncoding |
| MSTRG. 135983. 1  |              | XLOC_142896 | 229 coding   | noncoding | noncoding | noncoding |
| MSTRG. 135990. 1  | LOC107984235 | XLOC_142899 | 316 coding   | coding    | noncoding | noncoding |
| MSTRG. 135997. 1  | MRLN         | XLOC_142904 | 432 coding   | noncoding | noncoding | noncoding |
| MSTRG. 136021. 1  |              | XLOC_142920 | 259 coding   | noncoding | noncoding | noncoding |
| MSTRG. 136108. 1  |              | XLOC_143002 | 248 coding   | noncoding | noncoding | noncoding |
| NR_134508. 1      | TMEM26       | XLOC_143007 | 2803 coding  | coding    | coding    | coding    |
| MSTRG. 136146. 1  | CABCOCO1     | XLOC_143019 | 566 coding   | noncoding | noncoding | noncoding |
| MSTRG. 136167. 1  |              | XLOC_143033 | 306 coding   | noncoding | noncoding | noncoding |
| MSTRG. 136170. 1  |              | XLOC_143046 | 285 coding   | noncoding | noncoding | noncoding |
| MSTRG. 136249. 1  |              | XLOC_143064 | 246 coding   | noncoding | noncoding | noncoding |
| MSTRG. 136263. 1  |              | XLOC_143072 | 218 coding   | noncoding | noncoding | noncoding |
| XM_017015900. 1   | JMJD1C       | XLOC_143078 | 8771 coding  | coding    | coding    | coding    |
| MSTRG. 136635. 20 | JMJD1C       | XLOC_143078 | 4266 coding  | noncoding | coding    | coding    |
| MSTRG. 136297. 1  | LOC107984238 | XLOC_143086 | 412 coding   | noncoding | noncoding | noncoding |
| MSTRG. 136299. 1  |              | XLOC_143087 | 262 coding   | noncoding | noncoding | noncoding |
| MSTRG. 136308. 1  |              | XLOC_143094 | 278 coding   | noncoding | noncoding | noncoding |
| MSTRG. 136313. 1  |              | XLOC_143096 | 225 coding   | noncoding | noncoding | noncoding |
| MSTRG. 136329. 1  |              | XLOC_143104 | 233 coding   | noncoding | noncoding | noncoding |
| MSTRG. 136330. 1  |              | XLOC_143105 | 209 coding   | noncoding | noncoding | noncoding |
| NR_134456. 1      | LINC02671    | XLOC_143111 | 2572 coding  | noncoding | noncoding | noncoding |
| MSTRG. 136351. 1  |              | XLOC_143116 | 266 coding   | noncoding | noncoding | noncoding |
| MSTRG. 136381. 1  | LOC105378338 | XLOC_143136 | 266 coding   | noncoding | noncoding | noncoding |
| MSTRG. 136385. 1  | LOC105378339 | XLOC_143138 | 256 coding   | noncoding | noncoding | noncoding |
| XM_017016152. 1   | CTNNA3       | XLOC_143139 | 10984 coding | coding    | coding    | coding    |
| MSTRG. 136485. 1  | LOC105378340 | XLOC_143141 | 315 coding   | noncoding | noncoding | noncoding |

|                   |            |             |             |           |           |           |
|-------------------|------------|-------------|-------------|-----------|-----------|-----------|
| MSTRG. 136488. 1  | CTNNA3     | XLOC_143144 | 236 coding  | coding    | noncoding | noncoding |
| MSTRG. 136489. 1  | CTNNA3     | XLOC_143145 | 264 coding  | noncoding | coding    | noncoding |
| MSTRG. 136532. 1  | CTNNA3     | XLOC_143161 | 294 coding  | noncoding | noncoding | noncoding |
| MSTRG. 136537. 1  | CTNNA3     | XLOC_143164 | 273 coding  | noncoding | noncoding | noncoding |
| MSTRG. 136544. 1  | CTNNA3     | XLOC_143167 | 526 coding  | coding    | noncoding | noncoding |
| MSTRG. 136583. 1  | HERC4      | XLOC_143191 | 252 coding  | noncoding | noncoding | noncoding |
| MSTRG. 136585. 1  | HERC4      | XLOC_143193 | 221 coding  | noncoding | noncoding | noncoding |
| MSTRG. 136554. 1  |            | XLOC_143202 | 273 coding  | noncoding | noncoding | noncoding |
| XR_246097. 2      | RUFY2      | XLOC_143203 | 4546 coding | coding    | coding    | coding    |
| MSTRG. 136602. 1  | DNA2       | XLOC_143205 | 292 coding  | noncoding | noncoding | noncoding |
| MSTRG. 136603. 1  |            | XLOC_143206 | 279 coding  | noncoding | noncoding | noncoding |
| MSTRG. 136612. 1  | TET1       | XLOC_143210 | 285 coding  | noncoding | noncoding | noncoding |
| MSTRG. 136661. 1  | STOX1      | XLOC_143226 | 235 coding  | noncoding | noncoding | noncoding |
| MSTRG. 136664. 1  | STOX1      | XLOC_143229 | 229 coding  | noncoding | noncoding | noncoding |
| MSTRG. 136738. 1  |            | XLOC_143272 | 251 coding  | noncoding | noncoding | noncoding |
| MSTRG. 136840. 1  | PALD1      | XLOC_143308 | 306 coding  | noncoding | noncoding | noncoding |
| MSTRG. 136863. 1  | ADAMTS14   | XLOC_143323 | 273 coding  | noncoding | noncoding | noncoding |
| MSTRG. 136879. 1  |            | XLOC_143335 | 405 coding  | noncoding | noncoding | noncoding |
| MSTRG. 136906. 1  | UNC5B      | XLOC_143343 | 392 coding  | noncoding | noncoding | noncoding |
| MSTRG. 136907. 1  | UNC5B      | XLOC_143344 | 235 coding  | noncoding | noncoding | noncoding |
| MSTRG. 136932. 1  |            | XLOC_143391 | 263 coding  | coding    | noncoding | noncoding |
| MSTRG. 136937. 1  |            | XLOC_143394 | 404 coding  | noncoding | noncoding | noncoding |
| MSTRG. 136999. 41 | ASCC1      | XLOC_143397 | 1496 coding | noncoding | noncoding | noncoding |
| MSTRG. 137001. 1  |            | XLOC_143398 | 283 coding  | noncoding | noncoding | noncoding |
| MSTRG. 136939. 1  |            | XLOC_143399 | 259 coding  | noncoding | noncoding | noncoding |
| MSTRG. 136989. 1  | DNAJB12    | XLOC_143407 | 247 coding  | noncoding | noncoding | noncoding |
| MSTRG. 137005. 1  | MICU1      | XLOC_143410 | 352 coding  | noncoding | noncoding | noncoding |
| MSTRG. 137007. 1  | MICU1      | XLOC_143412 | 283 coding  | noncoding | noncoding | noncoding |
| MSTRG. 137015. 1  | MICU1      | XLOC_143420 | 255 coding  | noncoding | noncoding | noncoding |
| MSTRG. 137017. 1  | MICU1      | XLOC_143422 | 290 coding  | noncoding | noncoding | noncoding |
| MSTRG. 136992. 1  |            | XLOC_143424 | 291 coding  | noncoding | noncoding | noncoding |
| MSTRG. 137110. 1  | P4HA1      | XLOC_143439 | 273 coding  | noncoding | noncoding | noncoding |
| MSTRG. 137118. 1  | ECD        | XLOC_143447 | 733 coding  | noncoding | noncoding | noncoding |
| MSTRG. 137129. 1  | DNAJC9-AS1 | XLOC_143456 | 226 coding  | noncoding | noncoding | noncoding |
| MSTRG. 137130. 1  | DNAJC9-AS1 | XLOC_143457 | 276 coding  | noncoding | noncoding | noncoding |
| MSTRG. 137138. 1  | CFAP70     | XLOC_143460 | 206 coding  | noncoding | noncoding | noncoding |
| XM_017016162. 2   | ANXA7      | XLOC_143463 | 4475 coding | coding    | coding    | coding    |
| NM_001142354. 2   | PPP3CB     | XLOC_143469 | 3497 coding | coding    | coding    | coding    |
| NM_021132. 4      | PPP3CB     | XLOC_143469 | 3519 coding | coding    | coding    | coding    |
| XM_024447832. 1   | USP54      | XLOC_143469 | 8730 coding | coding    | coding    | coding    |
| MSTRG. 137085. 1  | PPP3CB     | XLOC_143476 | 306 coding  | noncoding | noncoding | noncoding |
| MSTRG. 137097. 1  | USP54      | XLOC_143483 | 302 coding  | noncoding | noncoding | noncoding |
| MSTRG. 137098. 1  | USP54      | XLOC_143484 | 274 coding  | noncoding | noncoding | noncoding |

|                  |              |             |              |           |           |           |
|------------------|--------------|-------------|--------------|-----------|-----------|-----------|
| MSTRG. 137063. 1 | LOC105378360 | XLOC_143488 | 280 coding   | noncoding | noncoding | noncoding |
| MSTRG. 137177. 1 |              | XLOC_143498 | 203 coding   | noncoding | noncoding | noncoding |
| XM_011540310. 3  | NDST2        | XLOC_143499 | 4558 coding  | coding    | coding    | coding    |
| MSTRG. 137149. 1 | PLAU         | XLOC_143505 | 256 coding   | noncoding | noncoding | noncoding |
| MSTRG. 137254. 1 | ADK          | XLOC_143514 | 303 coding   | noncoding | noncoding | noncoding |
| MSTRG. 137229. 1 | SAMD8        | XLOC_143551 | 232 coding   | noncoding | noncoding | noncoding |
| MSTRG. 137231. 2 | SAMD8        | XLOC_143553 | 2704 coding  | coding    | noncoding | noncoding |
| MSTRG. 137231. 7 | SAMD8        | XLOC_143553 | 2317 coding  | coding    | noncoding | noncoding |
| MSTRG. 137188. 1 | ZNF503-AS1   | XLOC_143562 | 299 coding   | noncoding | noncoding | noncoding |
| MSTRG. 137316. 1 |              | XLOC_143577 | 293 coding   | noncoding | noncoding | noncoding |
| XM_017016220. 2  | KCNMA1       | XLOC_143583 | 12705 coding | noncoding | coding    | coding    |
| NM_001271520. 2  | KCNMA1       | XLOC_143583 | 1352 coding  | noncoding | coding    | coding    |
| MSTRG. 137385. 1 | KCNMA1       | XLOC_143603 | 407 coding   | coding    | noncoding | noncoding |
| MSTRG. 137330. 1 |              | XLOC_143609 | 282 coding   | noncoding | noncoding | noncoding |
| MSTRG. 137487. 1 |              | XLOC_143682 | 433 coding   | noncoding | noncoding | noncoding |
| MSTRG. 137492. 1 |              | XLOC_143683 | 261 coding   | noncoding | noncoding | noncoding |
| MSTRG. 137502. 1 | BMS1P21      | XLOC_143701 | 257 coding   | noncoding | noncoding | noncoding |
| NM_003019. 5     | SFTPD        | XLOC_143703 | 1283 coding  | coding    | coding    | coding    |
| NR_027428. 1     | TMEM254-AS1  | XLOC_143704 | 4046 coding  | noncoding | coding    | noncoding |
| MSTRG. 137601. 1 | ANXA11       | XLOC_143707 | 263 coding   | noncoding | noncoding | noncoding |
| MSTRG. 137579. 1 |              | XLOC_143717 | 267 coding   | noncoding | noncoding | noncoding |
| MSTRG. 137584. 1 |              | XLOC_143720 | 271 coding   | noncoding | noncoding | noncoding |
| XM_011539334. 2  | DYDC1        | XLOC_143722 | 3275 coding  | coding    | coding    | coding    |
| MSTRG. 137619. 1 | SH2D4B       | XLOC_143736 | 310 coding   | noncoding | noncoding | noncoding |
| MSTRG. 137622. 1 |              | XLOC_143738 | 263 coding   | noncoding | noncoding | noncoding |
| MSTRG. 137647. 1 |              | XLOC_143747 | 227 coding   | noncoding | noncoding | noncoding |
| MSTRG. 137720. 1 | NRG3         | XLOC_143757 | 216 coding   | noncoding | noncoding | noncoding |
| MSTRG. 137699. 1 |              | XLOC_143793 | 310 coding   | noncoding | noncoding | noncoding |
| MSTRG. 137701. 1 |              | XLOC_143795 | 258 coding   | noncoding | noncoding | noncoding |
| MSTRG. 137706. 1 |              | XLOC_143798 | 382 coding   | noncoding | noncoding | noncoding |
| MSTRG. 137762. 1 | LOC105378399 | XLOC_143806 | 285 coding   | noncoding | noncoding | noncoding |
| MSTRG. 137782. 1 |              | XLOC_143823 | 340 coding   | noncoding | noncoding | noncoding |
| MSTRG. 137795. 1 |              | XLOC_143831 | 220 coding   | noncoding | noncoding | noncoding |
| MSTRG. 137851. 1 | GRID1        | XLOC_143840 | 268 coding   | noncoding | noncoding | noncoding |
| MSTRG. 137874. 1 | GRID1        | XLOC_143846 | 225 coding   | noncoding | noncoding | noncoding |
| MSTRG. 137839. 1 |              | XLOC_143853 | 251 coding   | noncoding | noncoding | noncoding |
| MSTRG. 137886. 1 |              | XLOC_143870 | 280 coding   | noncoding | noncoding | noncoding |
| MSTRG. 137919. 1 | SNCG         | XLOC_143879 | 308 coding   | noncoding | noncoding | noncoding |
| MSTRG. 137913. 1 |              | XLOC_143880 | 254 coding   | noncoding | noncoding | noncoding |
| MSTRG. 137949. 5 | MINPP1       | XLOC_143904 | 889 coding   | noncoding | noncoding | noncoding |
| MSTRG. 137954. 1 | PAPSS2       | XLOC_143908 | 243 coding   | noncoding | noncoding | noncoding |
| XR_946175. 2     | LOC105378415 | XLOC_143936 | 15139 coding | noncoding | coding    | noncoding |
| MSTRG. 138134. 1 |              | XLOC_143990 | 294 coding   | noncoding | noncoding | noncoding |

|                |    |            |             |             |           |           |           |
|----------------|----|------------|-------------|-------------|-----------|-----------|-----------|
| MSTRG. 138363. | 15 |            | XLOC_144004 | 4973 coding | noncoding | noncoding | noncoding |
| MSTRG. 138345. | 1  | SLC16A12   | XLOC_144038 | 263 coding  | noncoding | noncoding | noncoding |
| NM_148978.     | 3  | PANK1      | XLOC_144041 | 6225 coding | coding    | coding    | coding    |
| MSTRG. 138466. | 1  |            | XLOC_144111 | 247 coding  | noncoding | noncoding | noncoding |
| MSTRG. 138478. | 1  | LINC02653  | XLOC_144116 | 311 coding  | noncoding | noncoding | noncoding |
| XM_024447973.  | 1  | HTR7       | XLOC_144130 | 4711 coding | coding    | coding    | coding    |
| MSTRG. 138576. | 1  | HECTD2-AS1 | XLOC_144151 | 283 coding  | noncoding | noncoding | noncoding |
| MSTRG. 138578. | 1  | HECTD2-AS1 | XLOC_144152 | 292 coding  | noncoding | noncoding | noncoding |
| MSTRG. 138563. | 1  |            | XLOC_144161 | 294 coding  | coding    | noncoding | noncoding |
| MSTRG. 138564. | 1  |            | XLOC_144163 | 236 coding  | noncoding | noncoding | noncoding |
| MSTRG. 138572. | 1  |            | XLOC_144166 | 316 coding  | noncoding | noncoding | noncoding |
| MSTRG. 138675. | 1  |            | XLOC_144178 | 269 coding  | noncoding | noncoding | noncoding |
| MSTRG. 138679. | 1  |            | XLOC_144180 | 249 coding  | noncoding | noncoding | noncoding |
| MSTRG. 138682. | 1  |            | XLOC_144182 | 229 coding  | noncoding | noncoding | noncoding |
| MSTRG. 138715. | 1  |            | XLOC_144197 | 314 coding  | noncoding | noncoding | noncoding |
| MSTRG. 138732. | 1  |            | XLOC_144205 | 306 coding  | noncoding | noncoding | noncoding |
| MSTRG. 138733. | 1  |            | XLOC_144206 | 238 coding  | noncoding | noncoding | noncoding |
| MSTRG. 138735. | 1  |            | XLOC_144207 | 296 coding  | noncoding | noncoding | noncoding |
| MSTRG. 138734. | 1  |            | XLOC_144208 | 302 coding  | noncoding | noncoding | noncoding |
| MSTRG. 138737. | 1  |            | XLOC_144209 | 237 coding  | noncoding | noncoding | noncoding |
| MSTRG. 138741. | 1  |            | XLOC_144210 | 230 coding  | noncoding | noncoding | noncoding |
| MSTRG. 138744. | 1  |            | XLOC_144215 | 251 coding  | noncoding | noncoding | noncoding |
| MSTRG. 138872. | 1  | PLCE1      | XLOC_144254 | 273 coding  | noncoding | noncoding | noncoding |
| MSTRG. 138817. | 1  | TBC1D12    | XLOC_144264 | 318 coding  | noncoding | noncoding | noncoding |
| MSTRG. 138825. | 1  | TBC1D12    | XLOC_144270 | 239 coding  | noncoding | noncoding | noncoding |
| MSTRG. 138830. | 1  | CYP2C18    | XLOC_144281 | 297 coding  | coding    | noncoding | noncoding |
| MSTRG. 138839. | 1  | CYP2C19    | XLOC_144285 | 315 coding  | coding    | noncoding | noncoding |
| MSTRG. 138840. | 1  | CYP2C19    | XLOC_144286 | 243 coding  | noncoding | noncoding | noncoding |
| MSTRG. 138903. | 1  |            | XLOC_144288 | 286 coding  | noncoding | noncoding | noncoding |
| MSTRG. 138911. | 1  |            | XLOC_144293 | 302 coding  | coding    | noncoding | noncoding |
| MSTRG. 138879. | 1  |            | XLOC_144294 | 278 coding  | coding    | noncoding | noncoding |
| MSTRG. 138909. | 1  |            | XLOC_144295 | 226 coding  | coding    | noncoding | noncoding |
| MSTRG. 138914. | 1  |            | XLOC_144308 | 209 coding  | noncoding | noncoding | noncoding |
| XM_011540330.  | 1  | PDLIM1     | XLOC_144309 | 1285 coding | coding    | coding    | coding    |
| MSTRG. 138920. | 1  | PDLIM1     | XLOC_144310 | 268 coding  | noncoding | noncoding | noncoding |
| MSTRG. 138949. | 1  |            | XLOC_144321 | 243 coding  | noncoding | noncoding | noncoding |
| MSTRG. 139129. | 11 | ENTPD1-AS1 | XLOC_144327 | 7855 coding | coding    | coding    | coding    |
| MSTRG. 139184. | 1  | ENTPD1-AS1 | XLOC_144335 | 270 coding  | noncoding | noncoding | noncoding |
| MSTRG. 138978. | 1  |            | XLOC_144368 | 422 coding  | noncoding | noncoding | noncoding |
| MSTRG. 138979. | 1  |            | XLOC_144369 | 245 coding  | noncoding | noncoding | noncoding |
| MSTRG. 139004. | 1  | ZNF518A    | XLOC_144378 | 224 coding  | noncoding | noncoding | noncoding |
| NM_013314.     | 3  | BLNK       | XLOC_144379 | 1823 coding | coding    | coding    | coding    |
| NM_012465.     | 4  | TLL2       | XLOC_144395 | 6769 coding | coding    | coding    | coding    |

|                |                |             |             |           |           |           |
|----------------|----------------|-------------|-------------|-----------|-----------|-----------|
| XM_011539249.1 | PIK3AP1        | XLOC_144402 | 4647 coding | coding    | coding    | coding    |
| MSTRG.139044.1 | PIK3AP1        | XLOC_144409 | 208 coding  | noncoding | noncoding | noncoding |
| MSTRG.139025.1 |                | XLOC_144416 | 304 coding  | noncoding | noncoding | noncoding |
| MSTRG.139115.1 | LOC105378447   | XLOC_144425 | 239 coding  | noncoding | noncoding | noncoding |
| MSTRG.139120.1 | ARHGAP19-SLIT1 | XLOC_144427 | 263 coding  | noncoding | noncoding | noncoding |
| MSTRG.139058.1 |                | XLOC_144455 | 204 coding  | noncoding | noncoding | noncoding |
| MSTRG.139063.1 | MARVELD1       | XLOC_144459 | 472 coding  | noncoding | noncoding | noncoding |
| MSTRG.139264.4 | ZFYVE27        | XLOC_144461 | 396 coding  | noncoding | noncoding | noncoding |
| MSTRG.139373.1 | HPSE2          | XLOC_144505 | 256 coding  | noncoding | noncoding | noncoding |
| MSTRG.139391.1 | HPSE2          | XLOC_144513 | 277 coding  | noncoding | noncoding | noncoding |
| MSTRG.139393.1 | HPSE2          | XLOC_144515 | 251 coding  | noncoding | noncoding | noncoding |
| MSTRG.139359.1 |                | XLOC_144522 | 293 coding  | noncoding | noncoding | noncoding |
| MSTRG.139410.1 | LOC101927300   | XLOC_144532 | 270 coding  | noncoding | noncoding | noncoding |
| MSTRG.139413.1 |                | XLOC_144535 | 205 coding  | noncoding | noncoding | noncoding |
| MSTRG.139439.1 | ABCC2          | XLOC_144546 | 226 coding  | coding    | noncoding | noncoding |
| MSTRG.139432.1 |                | XLOC_144552 | 254 coding  | noncoding | noncoding | noncoding |
| NM_015490.4    | SEC31B         | XLOC_144588 | 4634 coding | noncoding | coding    | coding    |
| MSTRG.139539.2 | HIF1AN         | XLOC_144590 | 5909 coding | coding    | coding    | noncoding |
| MSTRG.139544.1 |                | XLOC_144598 | 278 coding  | noncoding | noncoding | noncoding |
| MSTRG.139576.1 | TLX1NB         | XLOC_144615 | 289 coding  | noncoding | noncoding | noncoding |
| MSTRG.139571.1 | LINC01514      | XLOC_144619 | 323 coding  | noncoding | noncoding | noncoding |
| MSTRG.139595.9 | BTRC           | XLOC_144623 | 1396 coding | coding    | noncoding | noncoding |
| MSTRG.139624.1 | FBXW4          | XLOC_144627 | 293 coding  | noncoding | noncoding | noncoding |
| MSTRG.139695.1 | ARMH3          | XLOC_144653 | 340 coding  | noncoding | noncoding | noncoding |
| MSTRG.139658.1 | PPRC1          | XLOC_144666 | 266 coding  | noncoding | noncoding | noncoding |
| MSTRG.139643.1 |                | XLOC_144670 | 290 coding  | noncoding | noncoding | noncoding |
| MSTRG.139702.5 | LOC107984263   | XLOC_144673 | 3436 coding | coding    | coding    | coding    |
| MSTRG.139667.1 | PSD            | XLOC_144677 | 293 coding  | noncoding | noncoding | noncoding |
| MSTRG.139740.1 | SUFU           | XLOC_144694 | 258 coding  | noncoding | noncoding | noncoding |
| MSTRG.139752.1 | SUFU           | XLOC_144704 | 277 coding  | noncoding | noncoding | noncoding |
| MSTRG.139718.4 | LOC105378460   | XLOC_144715 | 3208 coding | noncoding | coding    | coding    |
| MSTRG.139716.1 |                | XLOC_144717 | 275 coding  | noncoding | noncoding | noncoding |
| MSTRG.139767.1 |                | XLOC_144730 | 322 coding  | noncoding | noncoding | noncoding |
| MSTRG.139790.1 |                | XLOC_144747 | 852 coding  | noncoding | noncoding | noncoding |
| MSTRG.139792.1 |                | XLOC_144749 | 265 coding  | noncoding | noncoding | noncoding |
| MSTRG.139795.1 | INA            | XLOC_144750 | 231 coding  | noncoding | noncoding | noncoding |
| NM_001011663.2 | PCGF6          | XLOC_144751 | 2236 coding | coding    | coding    | coding    |
| MSTRG.139799.1 | PCGF6          | XLOC_144752 | 336 coding  | noncoding | noncoding | noncoding |
| NM_001129742.2 | CALHM3         | XLOC_144759 | 1652 coding | coding    | coding    | coding    |
| MSTRG.139806.1 | NEURL1         | XLOC_144762 | 265 coding  | noncoding | noncoding | noncoding |
| MSTRG.139849.1 | SH3PXD2A       | XLOC_144779 | 276 coding  | noncoding | noncoding | noncoding |
| MSTRG.139852.1 | SH3PXD2A       | XLOC_144780 | 282 coding  | noncoding | noncoding | noncoding |
| MSTRG.139860.1 | SH3PXD2A       | XLOC_144784 | 271 coding  | noncoding | noncoding | noncoding |

|                  |              |             |             |           |           |           |
|------------------|--------------|-------------|-------------|-----------|-----------|-----------|
| MSTRG. 139930. 1 |              | XLOC_144866 | 308 coding  | coding    | noncoding | noncoding |
| MSTRG. 140084. 1 |              | XLOC_144920 | 266 coding  | noncoding | noncoding | noncoding |
| MSTRG. 140083. 1 |              | XLOC_144922 | 320 coding  | coding    | noncoding | noncoding |
| NM_001206572. 2  | SORCS1       | XLOC_144923 | 7605 coding | coding    | coding    | coding    |
| MSTRG. 140119. 1 | SORCS1       | XLOC_144931 | 259 coding  | noncoding | noncoding | noncoding |
| MSTRG. 140134. 1 | LINC01435    | XLOC_144988 | 231 coding  | noncoding | noncoding | noncoding |
| MSTRG. 140156. 1 |              | XLOC_145004 | 299 coding  | noncoding | noncoding | noncoding |
| MSTRG. 140172. 1 |              | XLOC_145011 | 269 coding  | noncoding | noncoding | noncoding |
| MSTRG. 140239. 1 |              | XLOC_145019 | 388 coding  | noncoding | noncoding | noncoding |
| MSTRG. 140241. 1 |              | XLOC_145021 | 242 coding  | noncoding | noncoding | noncoding |
| MSTRG. 140363. 1 |              | XLOC_145073 | 230 coding  | noncoding | noncoding | noncoding |
| MSTRG. 140374. 1 |              | XLOC_145081 | 257 coding  | noncoding | noncoding | noncoding |
| MSTRG. 140389. 1 |              | XLOC_145088 | 273 coding  | noncoding | noncoding | noncoding |
| MSTRG. 140398. 1 |              | XLOC_145095 | 274 coding  | coding    | noncoding | noncoding |
| MSTRG. 140553. 3 | NHLRC2       | XLOC_145187 | 2763 coding | coding    | coding    | noncoding |
| MSTRG. 140541. 1 | LOC105378492 | XLOC_145192 | 263 coding  | noncoding | noncoding | noncoding |
| MSTRG. 140616. 1 | AFAP1L2      | XLOC_145205 | 331 coding  | noncoding | noncoding | noncoding |
| MSTRG. 140716. 1 | LOC107984272 | XLOC_145216 | 238 coding  | noncoding | noncoding | noncoding |
| MSTRG. 140718. 1 | LOC107984272 | XLOC_145217 | 317 coding  | noncoding | noncoding | noncoding |
| MSTRG. 140777. 1 | ATRNL1       | XLOC_145224 | 392 coding  | noncoding | noncoding | noncoding |
| MSTRG. 140780. 1 | ATRNL1       | XLOC_145226 | 264 coding  | noncoding | noncoding | noncoding |
| MSTRG. 140785. 1 | ATRNL1       | XLOC_145230 | 384 coding  | noncoding | noncoding | noncoding |
| MSTRG. 140788. 1 | ATRNL1       | XLOC_145231 | 244 coding  | noncoding | noncoding | noncoding |
| MSTRG. 140753. 1 | GFRA1        | XLOC_145252 | 267 coding  | noncoding | noncoding | noncoding |
| MSTRG. 140764. 1 |              | XLOC_145258 | 676 coding  | coding    | noncoding | noncoding |
| XM_005269673. 5  | HSPA12A      | XLOC_145260 | 8847 coding | noncoding | coding    | coding    |
| MSTRG. 140841. 1 | HSPA12A      | XLOC_145262 | 296 coding  | noncoding | noncoding | noncoding |
| MSTRG. 140854. 1 | SHTN1        | XLOC_145270 | 244 coding  | noncoding | noncoding | noncoding |
| MSTRG. 140831. 1 |              | XLOC_145274 | 261 coding  | noncoding | noncoding | noncoding |
| MSTRG. 140887. 1 |              | XLOC_145317 | 334 coding  | noncoding | noncoding | noncoding |
| MSTRG. 140984. 1 | CASC2        | XLOC_145338 | 410 coding  | noncoding | noncoding | noncoding |
| MSTRG. 140940. 1 |              | XLOC_145353 | 522 coding  | noncoding | noncoding | noncoding |
| NM_004248. 3     | PRLHR        | XLOC_145354 | 5387 coding | coding    | coding    | coding    |
| MSTRG. 140987. 1 |              | XLOC_145367 | 286 coding  | noncoding | noncoding | noncoding |
| MSTRG. 140996. 1 |              | XLOC_145370 | 402 coding  | noncoding | noncoding | noncoding |
| MSTRG. 141027. 1 |              | XLOC_145381 | 686 coding  | noncoding | noncoding | noncoding |
| MSTRG. 141073. 1 |              | XLOC_145429 | 332 coding  | noncoding | noncoding | noncoding |
| MSTRG. 141074. 1 |              | XLOC_145430 | 653 coding  | noncoding | noncoding | noncoding |
| MSTRG. 141084. 1 | LOC105378515 | XLOC_145433 | 289 coding  | noncoding | noncoding | noncoding |
| MSTRG. 141092. 3 | PLPP4        | XLOC_145436 | 2039 coding | coding    | noncoding | noncoding |
| MSTRG. 141092. 5 | PLPP4        | XLOC_145436 | 2332 coding | coding    | noncoding | coding    |
| MSTRG. 141092. 4 | PLPP4        | XLOC_145436 | 2460 coding | coding    | noncoding | noncoding |
| MSTRG. 141092. 2 | PLPP4        | XLOC_145436 | 1851 coding | coding    | noncoding | noncoding |

|                |              |             |             |           |           |           |
|----------------|--------------|-------------|-------------|-----------|-----------|-----------|
| MSTRG.141092.1 | PLPP4        | XLOC_145436 | 2131 coding | coding    | noncoding | coding    |
| MSTRG.141094.1 | PLPP4        | XLOC_145438 | 225 coding  | noncoding | noncoding | noncoding |
| MSTRG.141209.1 | WDR11-AS1    | XLOC_145449 | 200 coding  | noncoding | noncoding | noncoding |
| MSTRG.141131.1 | LOC105378521 | XLOC_145456 | 295 coding  | noncoding | noncoding | noncoding |
| MSTRG.141134.1 | LOC105378522 | XLOC_145458 | 317 coding  | noncoding | noncoding | noncoding |
| MSTRG.141156.1 |              | XLOC_145467 | 317 coding  | noncoding | noncoding | noncoding |
| NM_022970.3    | FGFR2        | XLOC_145468 | 4643 coding | coding    | coding    | coding    |
| MSTRG.141178.1 | FGFR2        | XLOC_145469 | 278 coding  | noncoding | noncoding | noncoding |
| MSTRG.141184.1 | FGFR2        | XLOC_145471 | 415 coding  | noncoding | noncoding | noncoding |
| MSTRG.141188.1 | FGFR2        | XLOC_145473 | 268 coding  | noncoding | noncoding | noncoding |
| MSTRG.141160.1 | LOC107984183 | XLOC_145476 | 390 coding  | noncoding | noncoding | noncoding |
| MSTRG.141168.1 |              | XLOC_145481 | 236 coding  | noncoding | noncoding | noncoding |
| MSTRG.141258.1 | ATE1         | XLOC_145489 | 396 coding  | noncoding | noncoding | noncoding |
| MSTRG.141264.1 | ATE1-AS1     | XLOC_145493 | 278 coding  | noncoding | noncoding | noncoding |
| MSTRG.141233.1 | TACC2        | XLOC_145498 | 208 coding  | noncoding | noncoding | noncoding |
| MSTRG.141271.4 | PLEKHA1      | XLOC_145506 | 2890 coding | coding    | coding    | noncoding |
| MSTRG.141248.1 | HTRA1        | XLOC_145512 | 336 coding  | noncoding | noncoding | noncoding |
| MSTRG.141289.1 |              | XLOC_145521 | 319 coding  | noncoding | noncoding | noncoding |
| NR_037915.1    | FAM24B-CUZD1 | XLOC_145525 | 2623 coding | coding    | coding    | coding    |
| NR_073476.1    | IKZF5        | XLOC_145541 | 4584 coding | noncoding | coding    | coding    |
| XR_001747625.1 | LOC107984128 | XLOC_145657 | 1963 coding | noncoding | noncoding | noncoding |
| MSTRG.141372.1 |              | XLOC_145675 | 253 coding  | noncoding | noncoding | noncoding |
| NM_001322966.2 | OAT          | XLOC_145676 | 2354 coding | coding    | coding    | coding    |
| NM_001146340.3 | NKX1-2       | XLOC_145677 | 3211 coding | coding    | coding    | coding    |
| MSTRG.141536.1 | FAM53B       | XLOC_145685 | 499 coding  | noncoding | noncoding | noncoding |
| MSTRG.141526.1 |              | XLOC_145720 | 256 coding  | noncoding | noncoding | noncoding |
| MSTRG.141628.1 | CTBP2        | XLOC_145721 | 8919 coding | coding    | coding    | coding    |
| MSTRG.141576.1 |              | XLOC_145723 | 266 coding  | noncoding | noncoding | noncoding |
| MSTRG.141577.1 |              | XLOC_145724 | 234 coding  | noncoding | noncoding | noncoding |
| MSTRG.141588.1 |              | XLOC_145730 | 307 coding  | noncoding | noncoding | noncoding |
| MSTRG.141598.1 | TEX36        | XLOC_145735 | 455 coding  | coding    | noncoding | noncoding |
| MSTRG.141618.4 | EDRF1-AS1    | XLOC_145739 | 4373 coding | noncoding | coding    | coding    |
| MSTRG.141605.1 | UROS         | XLOC_145744 | 226 coding  | noncoding | noncoding | noncoding |
| MSTRG.141639.1 | FANK1        | XLOC_145750 | 256 coding  | coding    | noncoding | noncoding |
| MSTRG.141641.1 | FANK1        | XLOC_145752 | 497 coding  | noncoding | noncoding | noncoding |
| MSTRG.141642.1 | FANK1        | XLOC_145753 | 629 coding  | coding    | noncoding | noncoding |
| MSTRG.141691.1 | ADAM12       | XLOC_145761 | 316 coding  | noncoding | noncoding | noncoding |
| MSTRG.141665.1 | C10orf90     | XLOC_145774 | 319 coding  | noncoding | noncoding | noncoding |
| MSTRG.141763.1 | DOCK1        | XLOC_145790 | 247 coding  | noncoding | noncoding | noncoding |
| MSTRG.141774.1 | DOCK1        | XLOC_145797 | 294 coding  | noncoding | noncoding | noncoding |
| MSTRG.141779.1 | DOCK1        | XLOC_145800 | 202 coding  | noncoding | noncoding | noncoding |
| NM_152311.5    | CLRN3        | XLOC_145807 | 1146 coding | noncoding | coding    | coding    |
| MSTRG.141894.3 | PTPRE        | XLOC_145809 | 3056 coding | coding    | coding    | coding    |

|                  |              |             |             |           |           |           |
|------------------|--------------|-------------|-------------|-----------|-----------|-----------|
| MSTRG. 141845. 1 |              | XLOC_145857 | 354 coding  | noncoding | noncoding | noncoding |
| MSTRG. 141846. 1 |              | XLOC_145858 | 305 coding  | noncoding | noncoding | noncoding |
| MSTRG. 142170. 1 | ADGRA1-AS1   | XLOC_146026 | 275 coding  | noncoding | noncoding | noncoding |
| MSTRG. 142190. 1 | KNDC1        | XLOC_146033 | 228 coding  | noncoding | noncoding | noncoding |
| MSTRG. 142178. 1 |              | XLOC_146036 | 296 coding  | noncoding | noncoding | noncoding |
| XM_011539673. 2  | FUOM         | XLOC_146048 | 2818 coding | coding    | coding    | coding    |
| XM_011520235. 3  | PSMD13       | XLOC_146109 | 1395 coding | noncoding | coding    | coding    |
| XM_017018355. 1  | PGGHG        | XLOC_146113 | 3646 coding | coding    | coding    | coding    |
| XM_017017654. 1  | B4GALNT4     | XLOC_146119 | 4766 coding | coding    | coding    | coding    |
| MSTRG. 142387. 1 | DEAF1        | XLOC_146141 | 232 coding  | noncoding | noncoding | noncoding |
| MSTRG. 142390. 1 | EPS8L2       | XLOC_146143 | 326 coding  | noncoding | noncoding | noncoding |
| MSTRG. 142395. 1 | TALDO1       | XLOC_146146 | 509 coding  | noncoding | noncoding | noncoding |
| NM_001025237. 1  | TSPAN4       | XLOC_146164 | 1462 coding | coding    | coding    | coding    |
| MSTRG. 142439. 1 |              | XLOC_146174 | 562 coding  | noncoding | noncoding | noncoding |
| MSTRG. 142447. 1 |              | XLOC_146178 | 292 coding  | noncoding | noncoding | noncoding |
| MSTRG. 142458. 1 | LINC02689    | XLOC_146181 | 249 coding  | noncoding | noncoding | noncoding |
| MSTRG. 142449. 1 |              | XLOC_146183 | 391 coding  | noncoding | noncoding | noncoding |
| MSTRG. 142506. 1 |              | XLOC_146217 | 205 coding  | noncoding | noncoding | noncoding |
| MSTRG. 142518. 1 |              | XLOC_146220 | 272 coding  | noncoding | noncoding | noncoding |
| MSTRG. 142534. 2 | TSPAN32      | XLOC_146228 | 7516 coding | coding    | coding    | coding    |
| MSTRG. 142534. 7 | TSPAN32      | XLOC_146228 | 5440 coding | coding    | coding    | coding    |
| MSTRG. 142624. 1 | KCNQ1        | XLOC_146248 | 317 coding  | noncoding | noncoding | noncoding |
| MSTRG. 142557. 6 | NAP1L4       | XLOC_146289 | 2368 coding | coding    | noncoding | noncoding |
| MSTRG. 142595. 1 |              | XLOC_146309 | 323 coding  | noncoding | noncoding | noncoding |
| XM_006718181. 3  | PGAP2        | XLOC_146325 | 2451 coding | coding    | coding    | coding    |
| MSTRG. 142784. 1 | STIM1        | XLOC_146343 | 281 coding  | coding    | noncoding | noncoding |
| MSTRG. 142720. 1 |              | XLOC_146357 | 297 coding  | noncoding | noncoding | noncoding |
| MSTRG. 142741. 1 |              | XLOC_146403 | 229 coding  | noncoding | noncoding | noncoding |
| MSTRG. 142742. 1 |              | XLOC_146407 | 229 coding  | noncoding | noncoding | noncoding |
| MSTRG. 142758. 1 |              | XLOC_146420 | 243 coding  | noncoding | noncoding | noncoding |
| NM_001004489. 2  | OR2AG1       | XLOC_146567 | 998 coding  | coding    | coding    | coding    |
| MSTRG. 143029. 1 | OR10A4       | XLOC_146575 | 262 coding  | noncoding | noncoding | noncoding |
| MSTRG. 143064. 1 | ZNF215       | XLOC_146579 | 214 coding  | coding    | noncoding | noncoding |
| MSTRG. 143066. 1 | ZNF215       | XLOC_146580 | 222 coding  | noncoding | noncoding | noncoding |
| MSTRG. 143284. 1 | ST5          | XLOC_146666 | 273 coding  | noncoding | noncoding | noncoding |
| MSTRG. 143290. 1 | ST5          | XLOC_146669 | 200 coding  | noncoding | noncoding | noncoding |
| MSTRG. 143298. 1 | ST5          | XLOC_146674 | 229 coding  | noncoding | noncoding | noncoding |
| MSTRG. 143252. 1 | LOC105376542 | XLOC_146685 | 305 coding  | noncoding | noncoding | noncoding |
| MSTRG. 143310. 2 | TMEM41B      | XLOC_146691 | 632 coding  | coding    | noncoding | noncoding |
| MSTRG. 143347. 1 | ZNF143       | XLOC_146702 | 226 coding  | noncoding | noncoding | noncoding |
| MSTRG. 143348. 1 | ZNF143       | XLOC_146703 | 265 coding  | noncoding | noncoding | noncoding |
| MSTRG. 143352. 1 | ZNF143       | XLOC_146707 | 292 coding  | noncoding | noncoding | noncoding |
| MSTRG. 143354. 1 |              | XLOC_146708 | 260 coding  | noncoding | noncoding | noncoding |

|                 |            |             |              |           |           |           |
|-----------------|------------|-------------|--------------|-----------|-----------|-----------|
| NM_001143976.1  | WEE1       | XLOC_146709 | 3219 coding  | coding    | coding    | coding    |
| MSTRG.143662.1  | CAND1.11   | XLOC_146730 | 220 coding   | coding    | noncoding | noncoding |
| MSTRG.143441.11 | MRVII-AS1  | XLOC_146738 | 2170 coding  | coding    | noncoding | noncoding |
| MSTRG.143370.1  |            | XLOC_146743 | 242 coding   | noncoding | noncoding | noncoding |
| MSTRG.143429.1  |            | XLOC_146787 | 280 coding   | noncoding | noncoding | noncoding |
| NM_001080521.3  | RASSF10    | XLOC_146856 | 2804 coding  | noncoding | coding    | coding    |
| XM_017017748.1  | ARNTL      | XLOC_146863 | 2727 coding  | coding    | coding    | coding    |
| MSTRG.143666.1  |            | XLOC_146864 | 292 coding   | noncoding | noncoding | noncoding |
| MSTRG.143677.1  |            | XLOC_146866 | 267 coding   | noncoding | noncoding | noncoding |
| MSTRG.143715.1  |            | XLOC_146872 | 243 coding   | noncoding | noncoding | noncoding |
| MSTRG.143720.1  | LINC02548  | XLOC_146894 | 233 coding   | noncoding | noncoding | noncoding |
| MSTRG.144081.6  | PSMA1      | XLOC_146921 | 1971 coding  | coding    | coding    | noncoding |
| MSTRG.143854.1  |            | XLOC_146939 | 234 coding   | noncoding | noncoding | noncoding |
| MSTRG.143960.9  | SOX6       | XLOC_146994 | 5290 coding  | coding    | noncoding | noncoding |
| MSTRG.143960.13 | SOX6       | XLOC_146994 | 1812 coding  | noncoding | noncoding | coding    |
| MSTRG.143984.1  | SOX6       | XLOC_147001 | 295 coding   | noncoding | noncoding | noncoding |
| MSTRG.143941.1  | PLEKHA7    | XLOC_147015 | 502 coding   | noncoding | noncoding | noncoding |
| XM_024448533.1  | NUCB2      | XLOC_147032 | 2225 coding  | coding    | coding    | coding    |
| MSTRG.144025.1  | NUCB2      | XLOC_147035 | 313 coding   | noncoding | noncoding | noncoding |
| XM_011520072.3  | NCR3LG1    | XLOC_147037 | 6791 coding  | coding    | coding    | coding    |
| MSTRG.144029.1  |            | XLOC_147048 | 474 coding   | noncoding | noncoding | noncoding |
| MSTRG.144047.1  |            | XLOC_147050 | 291 coding   | noncoding | noncoding | noncoding |
| NR_026563.1     | SLC25A51P4 | XLOC_147076 | 1884 coding  | coding    | coding    | coding    |
| MSTRG.144157.1  |            | XLOC_147090 | 233 coding   | noncoding | noncoding | noncoding |
| MSTRG.144167.1  | IGSF22     | XLOC_147094 | 270 coding   | noncoding | noncoding | noncoding |
| MSTRG.144168.1  | IGSF22     | XLOC_147095 | 510 coding   | noncoding | noncoding | noncoding |
| MSTRG.144170.1  |            | XLOC_147097 | 313 coding   | noncoding | noncoding | noncoding |
| MSTRG.144169.1  |            | XLOC_147098 | 259 coding   | noncoding | noncoding | noncoding |
| MSTRG.144175.1  |            | XLOC_147102 | 286 coding   | noncoding | noncoding | noncoding |
| MSTRG.144231.1  | CSRP3-AS1  | XLOC_147115 | 285 coding   | noncoding | noncoding | noncoding |
| MSTRG.144241.1  | CSRP3-AS1  | XLOC_147119 | 306 coding   | noncoding | noncoding | noncoding |
| XM_017018522.1  | NAV2       | XLOC_147120 | 11241 coding | coding    | coding    | coding    |
| NM_001244963.2  | NAV2       | XLOC_147120 | 11669 coding | coding    | coding    | coding    |
| MSTRG.144283.1  | NAV2       | XLOC_147130 | 262 coding   | noncoding | coding    | noncoding |
| MSTRG.144286.1  | NAV2       | XLOC_147131 | 293 coding   | noncoding | noncoding | noncoding |
| MSTRG.144306.1  | NAV2       | XLOC_147136 | 248 coding   | noncoding | noncoding | noncoding |
| MSTRG.144247.1  |            | XLOC_147146 | 317 coding   | noncoding | noncoding | noncoding |
| MSTRG.144242.1  |            | XLOC_147149 | 318 coding   | noncoding | noncoding | noncoding |
| MSTRG.144255.1  |            | XLOC_147153 | 221 coding   | noncoding | noncoding | noncoding |
| MSTRG.144420.1  | HTATIP2    | XLOC_147157 | 244 coding   | noncoding | noncoding | noncoding |
| MSTRG.144423.1  | PRMT3      | XLOC_147159 | 314 coding   | noncoding | noncoding | noncoding |
| MSTRG.144339.1  | NELL1      | XLOC_147180 | 228 coding   | noncoding | noncoding | noncoding |
| MSTRG.144354.1  | NELL1      | XLOC_147186 | 304 coding   | noncoding | noncoding | noncoding |

|                  |              |             |             |           |           |           |
|------------------|--------------|-------------|-------------|-----------|-----------|-----------|
| MSTRG. 144366. 1 | NELL1        | XLOC_147189 | 243 coding  | noncoding | noncoding | noncoding |
| MSTRG. 144375. 1 | LOC102723370 | XLOC_147197 | 442 coding  | noncoding | noncoding | noncoding |
| MSTRG. 144398. 1 |              | XLOC_147212 | 302 coding  | coding    | noncoding | noncoding |
| NM_020346. 3     | SLC17A6      | XLOC_147214 | 3665 coding | coding    | coding    | coding    |
| MSTRG. 144644. 1 |              | XLOC_147237 | 254 coding  | noncoding | noncoding | noncoding |
| MSTRG. 144500. 1 |              | XLOC_147251 | 281 coding  | noncoding | noncoding | noncoding |
| MSTRG. 144507. 1 |              | XLOC_147256 | 231 coding  | noncoding | noncoding | noncoding |
| MSTRG. 144510. 1 |              | XLOC_147260 | 229 coding  | noncoding | noncoding | noncoding |
| MSTRG. 144516. 1 |              | XLOC_147261 | 267 coding  | noncoding | noncoding | noncoding |
| XM_024448468. 1  | LUZP2        | XLOC_147266 | 5775 coding | noncoding | coding    | coding    |
| MSTRG. 144545. 1 | LUZP2        | XLOC_147269 | 311 coding  | coding    | noncoding | noncoding |
| MSTRG. 144549. 1 | LUZP2        | XLOC_147271 | 261 coding  | noncoding | noncoding | noncoding |
| MSTRG. 144526. 1 |              | XLOC_147278 | 234 coding  | noncoding | noncoding | noncoding |
| MSTRG. 144567. 1 |              | XLOC_147288 | 231 coding  | noncoding | noncoding | noncoding |
| MSTRG. 144661. 1 | LINC02699    | XLOC_147293 | 355 coding  | noncoding | noncoding | noncoding |
| MSTRG. 144676. 1 |              | XLOC_147306 | 204 coding  | noncoding | noncoding | noncoding |
| MSTRG. 144680. 1 |              | XLOC_147310 | 235 coding  | noncoding | noncoding | noncoding |
| MSTRG. 144709. 1 | BBOX1-AS1    | XLOC_147312 | 313 coding  | coding    | noncoding | noncoding |
| MSTRG. 144711. 1 | BBOX1-AS1    | XLOC_147314 | 239 coding  | noncoding | noncoding | noncoding |
| MSTRG. 144703. 1 |              | XLOC_147319 | 243 coding  | noncoding | noncoding | noncoding |
| MSTRG. 144755. 1 | LOC105376671 | XLOC_147336 | 290 coding  | noncoding | noncoding | noncoding |
| MSTRG. 144794. 1 | BDNF         | XLOC_147346 | 305 coding  | noncoding | noncoding | noncoding |
| MSTRG. 144726. 1 |              | XLOC_147349 | 200 coding  | noncoding | noncoding | noncoding |
| MSTRG. 144811. 1 | LINC02758    | XLOC_147394 | 274 coding  | coding    | noncoding | noncoding |
| MSTRG. 144823. 1 |              | XLOC_147400 | 348 coding  | noncoding | noncoding | noncoding |
| MSTRG. 144854. 1 | LOC105376607 | XLOC_147413 | 370 coding  | noncoding | noncoding | noncoding |
| MSTRG. 144879. 1 | LOC101928316 | XLOC_147441 | 226 coding  | noncoding | noncoding | noncoding |
| MSTRG. 145157. 1 | DCDC1        | XLOC_147448 | 745 coding  | noncoding | noncoding | noncoding |
| MSTRG. 145159. 1 | DCDC1        | XLOC_147450 | 254 coding  | noncoding | noncoding | noncoding |
| MSTRG. 145162. 1 | DCDC1        | XLOC_147452 | 202 coding  | noncoding | noncoding | noncoding |
| MSTRG. 145226. 1 | ELP4         | XLOC_147504 | 260 coding  | noncoding | noncoding | noncoding |
| MSTRG. 144965. 1 | LOC107984322 | XLOC_147518 | 246 coding  | noncoding | noncoding | noncoding |
| MSTRG. 144997. 1 | CCDC73       | XLOC_147534 | 267 coding  | coding    | coding    | noncoding |
| XR_002957197. 1  | QSER1        | XLOC_147545 | 5175 coding | noncoding | coding    | coding    |
| MSTRG. 145076. 6 | HIPK3        | XLOC_147557 | 7393 coding | coding    | coding    | coding    |
| MSTRG. 145066. 1 | KIAA1549L    | XLOC_147576 | 241 coding  | noncoding | noncoding | noncoding |
| MSTRG. 145109. 3 | LMO2         | XLOC_147587 | 2061 coding | coding    | coding    | coding    |
| MSTRG. 145123. 1 | ELF5         | XLOC_147652 | 454 coding  | coding    | noncoding | coding    |
| MSTRG. 145127. 1 | LINC02707    | XLOC_147658 | 304 coding  | noncoding | noncoding | noncoding |
| MSTRG. 145390. 1 | LOC102723568 | XLOC_147664 | 267 coding  | noncoding | noncoding | noncoding |
| MSTRG. 145366. 1 | TRIM44       | XLOC_147730 | 288 coding  | noncoding | noncoding | noncoding |
| MSTRG. 145438. 1 | LDLRAD3      | XLOC_147752 | 283 coding  | noncoding | noncoding | noncoding |
| MSTRG. 145692. 1 | RAG1         | XLOC_147791 | 276 coding  | noncoding | noncoding | noncoding |

|                |           |             |             |           |           |           |
|----------------|-----------|-------------|-------------|-----------|-----------|-----------|
| MSTRG.145450.1 |           | XLOC_147800 | 309 coding  | noncoding | noncoding | noncoding |
| MSTRG.145468.1 |           | XLOC_147804 | 269 coding  | coding    | noncoding | noncoding |
| MSTRG.145470.1 |           | XLOC_147805 | 276 coding  | noncoding | noncoding | noncoding |
| MSTRG.145476.1 |           | XLOC_147808 | 288 coding  | noncoding | noncoding | noncoding |
| MSTRG.145492.1 |           | XLOC_147817 | 262 coding  | noncoding | noncoding | noncoding |
| MSTRG.145493.1 |           | XLOC_147820 | 278 coding  | noncoding | noncoding | noncoding |
| MSTRG.145502.1 |           | XLOC_147825 | 237 coding  | noncoding | noncoding | noncoding |
| MSTRG.145517.1 |           | XLOC_147830 | 232 coding  | noncoding | noncoding | noncoding |
| MSTRG.145520.1 |           | XLOC_147832 | 253 coding  | coding    | noncoding | noncoding |
| MSTRG.145542.1 |           | XLOC_147843 | 281 coding  | noncoding | noncoding | noncoding |
| MSTRG.145541.1 |           | XLOC_147845 | 266 coding  | noncoding | noncoding | noncoding |
| MSTRG.145549.1 |           | XLOC_147847 | 294 coding  | noncoding | noncoding | noncoding |
| MSTRG.145550.1 |           | XLOC_147848 | 265 coding  | noncoding | noncoding | noncoding |
| MSTRG.145553.1 |           | XLOC_147849 | 297 coding  | noncoding | noncoding | noncoding |
| MSTRG.145735.1 | LRRC4C    | XLOC_147888 | 282 coding  | noncoding | noncoding | noncoding |
| MSTRG.145736.1 | LRRC4C    | XLOC_147889 | 275 coding  | noncoding | noncoding | noncoding |
| MSTRG.145763.1 | LRRC4C    | XLOC_147902 | 259 coding  | noncoding | noncoding | noncoding |
| MSTRG.145604.1 |           | XLOC_147907 | 284 coding  | noncoding | noncoding | noncoding |
| MSTRG.145612.1 | LINC02741 | XLOC_147911 | 265 coding  | noncoding | noncoding | noncoding |
| MSTRG.145613.1 | LINC02741 | XLOC_147912 | 267 coding  | noncoding | noncoding | noncoding |
| MSTRG.145619.1 | LINC01499 | XLOC_147915 | 315 coding  | noncoding | noncoding | noncoding |
| MSTRG.145646.1 |           | XLOC_147928 | 293 coding  | noncoding | noncoding | noncoding |
| MSTRG.145702.1 |           | XLOC_147936 | 269 coding  | noncoding | noncoding | noncoding |
| MSTRG.145705.1 |           | XLOC_147937 | 262 coding  | noncoding | noncoding | noncoding |
| MSTRG.145718.1 |           | XLOC_147940 | 228 coding  | coding    | noncoding | noncoding |
| MSTRG.145719.1 |           | XLOC_147941 | 579 coding  | noncoding | noncoding | noncoding |
| MSTRG.145778.1 |           | XLOC_147973 | 251 coding  | noncoding | noncoding | noncoding |
| NM_016142.3    | HSD17B12  | XLOC_147978 | 2396 coding | coding    | coding    | coding    |
| MSTRG.145785.1 |           | XLOC_147997 | 248 coding  | noncoding | noncoding | noncoding |
| XR_001748004.1 | ACCS      | XLOC_148010 | 3516 coding | coding    | coding    | coding    |
| MSTRG.145903.1 | EXT2      | XLOC_148018 | 265 coding  | noncoding | noncoding | noncoding |
| MSTRG.145869.1 |           | XLOC_148022 | 299 coding  | noncoding | noncoding | noncoding |
| MSTRG.145875.1 |           | XLOC_148024 | 262 coding  | noncoding | noncoding | noncoding |
| MSTRG.145910.1 |           | XLOC_148033 | 211 coding  | noncoding | noncoding | noncoding |
| MSTRG.145932.1 | LINC02687 | XLOC_148051 | 243 coding  | noncoding | noncoding | noncoding |
| XM_017017173.1 | LARGE2    | XLOC_148071 | 2651 coding | coding    | coding    | coding    |
| MSTRG.146000.1 |           | XLOC_148080 | 261 coding  | noncoding | noncoding | noncoding |
| MSTRG.146005.1 |           | XLOC_148084 | 262 coding  | noncoding | noncoding | noncoding |
| MSTRG.146025.1 | DGKZ      | XLOC_148092 | 222 coding  | noncoding | noncoding | noncoding |
| NM_001346332.1 | ATG13     | XLOC_148107 | 6209 coding | coding    | coding    | coding    |
| MSTRG.146130.4 | ARHGAP1   | XLOC_148109 | 3217 coding | coding    | coding    | coding    |
| MSTRG.146121.1 | LRP4      | XLOC_148115 | 223 coding  | coding    | noncoding | noncoding |
| MSTRG.146117.1 |           | XLOC_148116 | 269 coding  | noncoding | noncoding | noncoding |

|                   |              |             |             |           |           |           |
|-------------------|--------------|-------------|-------------|-----------|-----------|-----------|
| MSTRG. 146145. 20 | C11orf49     | XLOC_148117 | 2678 coding | coding    | coding    | noncoding |
| MSTRG. 146155. 1  | MYBPC3       | XLOC_148128 | 399 coding  | noncoding | coding    | noncoding |
| MSTRG. 146160. 3  | SPI1         | XLOC_148130 | 5203 coding | coding    | coding    | coding    |
| MSTRG. 146184. 1  | RAPSN        | XLOC_148141 | 304 coding  | noncoding | noncoding | noncoding |
| MSTRG. 146213. 1  |              | XLOC_148154 | 410 coding  | noncoding | noncoding | noncoding |
| XR_930883. 2      | PTPRJ        | XLOC_148155 | 3975 coding | coding    | coding    | coding    |
| MSTRG. 146342. 1  | PTPRJ        | XLOC_148193 | 203 coding  | noncoding | noncoding | noncoding |
| MSTRG. 146229. 1  |              | XLOC_148206 | 272 coding  | coding    | noncoding | noncoding |
| MSTRG. 146235. 1  |              | XLOC_148209 | 268 coding  | noncoding | noncoding | noncoding |
| MSTRG. 146237. 1  |              | XLOC_148210 | 301 coding  | noncoding | noncoding | noncoding |
| MSTRG. 146246. 1  |              | XLOC_148216 | 274 coding  | noncoding | noncoding | noncoding |
| MSTRG. 146267. 1  |              | XLOC_148222 | 228 coding  | noncoding | noncoding | noncoding |
| MSTRG. 146264. 1  |              | XLOC_148224 | 254 coding  | noncoding | noncoding | noncoding |
| MSTRG. 146276. 1  | LOC107984330 | XLOC_148231 | 466 coding  | noncoding | noncoding | noncoding |
| MSTRG. 146279. 1  | LOC441601    | XLOC_148232 | 332 coding  | noncoding | noncoding | noncoding |
| MSTRG. 146284. 1  | LINC02750    | XLOC_148234 | 321 coding  | noncoding | noncoding | noncoding |
| MSTRG. 146285. 1  | LINC02750    | XLOC_148235 | 274 coding  | noncoding | noncoding | noncoding |
| MSTRG. 146287. 1  |              | XLOC_148240 | 236 coding  | coding    | noncoding | noncoding |
| MSTRG. 146395. 1  |              | XLOC_148272 | 226 coding  | noncoding | noncoding | noncoding |
| MSTRG. 146397. 1  |              | XLOC_148273 | 260 coding  | coding    | noncoding | noncoding |
| MSTRG. 146400. 1  | OR4P4        | XLOC_148278 | 262 coding  | noncoding | noncoding | noncoding |
| NM_001001921. 1   | OR5AS1       | XLOC_148291 | 975 coding  | coding    | coding    | coding    |
| MSTRG. 146420. 1  |              | XLOC_148309 | 271 coding  | noncoding | noncoding | noncoding |
| XM_011545069. 2   | P2RX3        | XLOC_148332 | 4441 coding | coding    | coding    | coding    |
| MSTRG. 146461. 1  | P2RX3        | XLOC_148333 | 337 coding  | coding    | noncoding | noncoding |
| MSTRG. 146476. 1  |              | XLOC_148342 | 298 coding  | noncoding | noncoding | noncoding |
| MSTRG. 146475. 1  |              | XLOC_148346 | 319 coding  | noncoding | noncoding | noncoding |
| NM_015457. 3      | ZDHHC5       | XLOC_148355 | 4443 coding | coding    | coding    | coding    |
| NM_015959. 4      | TMX2         | XLOC_148358 | 1645 coding | coding    | coding    | coding    |
| MSTRG. 146555. 1  | CTNND1       | XLOC_148362 | 221 coding  | noncoding | noncoding | noncoding |
| MSTRG. 146556. 1  | CTNND1       | XLOC_148363 | 241 coding  | noncoding | noncoding | noncoding |
| MSTRG. 146516. 1  |              | XLOC_148368 | 636 coding  | coding    | noncoding | noncoding |
| MSTRG. 146528. 1  | OR9Q1        | XLOC_148373 | 215 coding  | noncoding | noncoding | noncoding |
| MSTRG. 146691. 1  | OR5A2        | XLOC_148470 | 304 coding  | coding    | noncoding | noncoding |
| MSTRG. 146766. 1  |              | XLOC_148508 | 286 coding  | noncoding | noncoding | noncoding |
| NM_001031666. 2   | MS4A3        | XLOC_148513 | 1309 coding | coding    | noncoding | noncoding |
| MSTRG. 146822. 6  | MS4A6A       | XLOC_148519 | 1444 coding | coding    | noncoding | noncoding |
| MSTRG. 146825. 1  |              | XLOC_148520 | 215 coding  | noncoding | noncoding | noncoding |
| NM_024021. 4      | MS4A4A       | XLOC_148524 | 1668 coding | coding    | coding    | coding    |
| MSTRG. 146793. 1  | MS4A15       | XLOC_148543 | 307 coding  | noncoding | noncoding | noncoding |
| MSTRG. 146801. 1  |              | XLOC_148547 | 280 coding  | noncoding | noncoding | noncoding |
| MSTRG. 146851. 1  |              | XLOC_148585 | 317 coding  | noncoding | noncoding | noncoding |
| MSTRG. 146908. 15 | TKFC         | XLOC_148596 | 5166 coding | coding    | coding    | coding    |

|                   |              |             |              |           |           |           |
|-------------------|--------------|-------------|--------------|-----------|-----------|-----------|
| MSTRG. 146895. 1  |              | XLOC_148599 | 269 coding   | noncoding | noncoding | noncoding |
| MSTRG. 146941. 1  |              | XLOC_148607 | 271 coding   | noncoding | noncoding | noncoding |
| MSTRG. 146942. 1  |              | XLOC_148608 | 428 coding   | noncoding | noncoding | noncoding |
| MSTRG. 146943. 1  |              | XLOC_148609 | 221 coding   | noncoding | noncoding | noncoding |
| NR_002775. 2      | RPLP0P2      | XLOC_148621 | 3525 coding  | coding    | coding    | coding    |
| MSTRG. 146901. 1  |              | XLOC_148622 | 526 coding   | noncoding | noncoding | noncoding |
| MSTRG. 146984. 18 | BEST1        | XLOC_148631 | 1075 coding  | coding    | noncoding | noncoding |
| MSTRG. 146980. 1  |              | XLOC_148637 | 228 coding   | noncoding | noncoding | noncoding |
| XM_005274005. 3   | SCGB2A2      | XLOC_148647 | 465 coding   | coding    | coding    | coding    |
| MSTRG. 147010. 1  |              | XLOC_148648 | 239 coding   | noncoding | noncoding | noncoding |
| MSTRG. 147022. 1  | ASRGL1       | XLOC_148651 | 440 coding   | noncoding | noncoding | noncoding |
| MSTRG. 147043. 32 | AHNAK        | XLOC_148658 | 17927 coding | noncoding | coding    | coding    |
| NM_001043229. 2   | CSKMT        | XLOC_148667 | 2034 coding  | coding    | coding    | coding    |
| MSTRG. 147141. 3  | BSCL2        | XLOC_148670 | 1449 coding  | coding    | coding    | noncoding |
| MSTRG. 147066. 1  |              | XLOC_148683 | 305 coding   | noncoding | noncoding | noncoding |
| MSTRG. 147068. 1  |              | XLOC_148686 | 346 coding   | noncoding | noncoding | noncoding |
| MSTRG. 147078. 1  | LOC105369333 | XLOC_148690 | 279 coding   | noncoding | noncoding | noncoding |
| MSTRG. 147098. 1  |              | XLOC_148692 | 294 coding   | noncoding | noncoding | noncoding |
| MSTRG. 147084. 1  |              | XLOC_148694 | 295 coding   | noncoding | noncoding | noncoding |
| MSTRG. 147105. 1  | SLC22A25     | XLOC_148695 | 209 coding   | noncoding | noncoding | noncoding |
| MSTRG. 147106. 1  | SLC22A25     | XLOC_148696 | 262 coding   | noncoding | noncoding | noncoding |
| MSTRG. 147108. 1  | SLC22A25     | XLOC_148697 | 300 coding   | noncoding | noncoding | noncoding |
| MSTRG. 147133. 1  | PLAAT2       | XLOC_148713 | 377 coding   | noncoding | noncoding | noncoding |
| MSTRG. 147134. 1  | PLAAT2       | XLOC_148714 | 285 coding   | noncoding | noncoding | noncoding |
| MSTRG. 147200. 1  | SPINDOC      | XLOC_148730 | 283 coding   | noncoding | noncoding | noncoding |
| MSTRG. 147216. 1  | MACROD1      | XLOC_148741 | 257 coding   | noncoding | noncoding | noncoding |
| MSTRG. 147208. 4  | STIP1        | XLOC_148746 | 275 coding   | coding    | noncoding | noncoding |
| NM_018484. 4      | SLC22A11     | XLOC_148775 | 3545 coding  | coding    | coding    | coding    |
| MSTRG. 147280. 1  |              | XLOC_148776 | 213 coding   | noncoding | noncoding | noncoding |
| MSTRG. 147289. 1  | NRXN2        | XLOC_148781 | 320 coding   | noncoding | noncoding | noncoding |
| MSTRG. 147290. 1  | NRXN2        | XLOC_148782 | 320 coding   | noncoding | noncoding | noncoding |
| MSTRG. 147308. 2  | RASGRP2      | XLOC_148785 | 2602 coding  | coding    | coding    | coding    |
| MSTRG. 147343. 1  |              | XLOC_148810 | 255 coding   | noncoding | noncoding | noncoding |
| MSTRG. 147321. 1  |              | XLOC_148812 | 289 coding   | noncoding | noncoding | noncoding |
| XM_017017452. 2   | POLA2        | XLOC_148828 | 3037 coding  | coding    | coding    | coding    |
| NR_131012. 1      | NEAT1        | XLOC_148840 | 22743 coding | noncoding | coding    | noncoding |
| MSTRG. 147412. 1  | LINC02736    | XLOC_148858 | 311 coding   | noncoding | noncoding | noncoding |
| XR_950207. 2      | RELA-DT      | XLOC_148883 | 969 coding   | noncoding | coding    | noncoding |
| MSTRG. 147443. 1  |              | XLOC_148884 | 310 coding   | noncoding | noncoding | noncoding |
| MSTRG. 147522. 1  | EFEMP2       | XLOC_148893 | 276 coding   | noncoding | noncoding | noncoding |
| MSTRG. 147526. 4  | FIBP         | XLOC_148895 | 1131 coding  | coding    | coding    | noncoding |
| MSTRG. 147462. 1  |              | XLOC_148905 | 291 coding   | noncoding | noncoding | noncoding |
| MSTRG. 147567. 1  |              | XLOC_148910 | 226 coding   | noncoding | noncoding | noncoding |

|                   |              |             |             |           |           |           |
|-------------------|--------------|-------------|-------------|-----------|-----------|-----------|
| MSTRG. 147569. 1  |              | XLOC_148912 | 262 coding  | noncoding | noncoding | noncoding |
| MSTRG. 147604. 1  | PACS1        | XLOC_148938 | 297 coding  | noncoding | noncoding | noncoding |
| MSTRG. 147611. 1  |              | XLOC_148942 | 266 coding  | noncoding | noncoding | noncoding |
| NR_135761. 1      | LOC102724064 | XLOC_148954 | 576 coding  | coding    | noncoding | coding    |
| MSTRG. 147562. 3  | MRPL11       | XLOC_148961 | 669 coding  | coding    | noncoding | noncoding |
| NM_130443. 4      | DPP3         | XLOC_148966 | 2660 coding | coding    | coding    | coding    |
| MSTRG. 147633. 1  | DPP3         | XLOC_148967 | 237 coding  | noncoding | noncoding | noncoding |
| MSTRG. 147645. 1  | ACTN3        | XLOC_148973 | 271 coding  | noncoding | noncoding | noncoding |
| MSTRG. 147653. 1  | SPTBN2       | XLOC_148985 | 299 coding  | noncoding | noncoding | noncoding |
| MSTRG. 147680. 1  |              | XLOC_149013 | 258 coding  | noncoding | noncoding | noncoding |
| MSTRG. 147714. 1  | KDM2A        | XLOC_149020 | 251 coding  | noncoding | noncoding | noncoding |
| MSTRG. 147769. 1  |              | XLOC_149058 | 280 coding  | noncoding | noncoding | noncoding |
| XM_024448323. 1   | TCIRG1       | XLOC_149081 | 3530 coding | coding    | coding    | coding    |
| MSTRG. 147845. 1  | CHKA         | XLOC_149088 | 363 coding  | noncoding | noncoding | noncoding |
| MSTRG. 147846. 1  | CHKA         | XLOC_149089 | 311 coding  | noncoding | noncoding | noncoding |
| MSTRG. 147827. 1  |              | XLOC_149093 | 248 coding  | noncoding | noncoding | noncoding |
| MSTRG. 147862. 1  | LRP5         | XLOC_149098 | 311 coding  | noncoding | noncoding | noncoding |
| MSTRG. 147956. 1  |              | XLOC_149099 | 228 coding  | noncoding | noncoding | noncoding |
| XM_024448601. 1   | PPP6R3       | XLOC_149101 | 5018 coding | coding    | coding    | coding    |
| NM_001352379. 2   | PPP6R3       | XLOC_149101 | 5356 coding | coding    | coding    | coding    |
| XM_024448603. 1   | PPP6R3       | XLOC_149101 | 4265 coding | coding    | coding    | coding    |
| MSTRG. 147963. 1  | PPP6R3       | XLOC_149105 | 316 coding  | noncoding | noncoding | noncoding |
| MSTRG. 147971. 1  | PPP6R3       | XLOC_149113 | 235 coding  | noncoding | noncoding | noncoding |
| MSTRG. 147865. 1  |              | XLOC_149127 | 296 coding  | noncoding | noncoding | noncoding |
| MSTRG. 147866. 1  |              | XLOC_149128 | 407 coding  | noncoding | noncoding | noncoding |
| MSTRG. 147905. 1  | IGHMBP2      | XLOC_149146 | 212 coding  | noncoding | noncoding | noncoding |
| MSTRG. 147897. 1  |              | XLOC_149151 | 227 coding  | noncoding | noncoding | noncoding |
| MSTRG. 147912. 1  | LOC338694    | XLOC_149161 | 250 coding  | noncoding | noncoding | noncoding |
| NM_001293294. 2   | MYEOV        | XLOC_149167 | 2477 coding | noncoding | coding    | coding    |
| MSTRG. 148027. 1  | FADD         | XLOC_149200 | 255 coding  | noncoding | noncoding | noncoding |
| MSTRG. 148065. 1  | SHANK2       | XLOC_149216 | 301 coding  | noncoding | noncoding | noncoding |
| MSTRG. 148079. 1  | SHANK2       | XLOC_149223 | 264 coding  | noncoding | noncoding | noncoding |
| MSTRG. 148154. 1  | RNF121       | XLOC_149252 | 218 coding  | noncoding | noncoding | noncoding |
| XM_024448304. 1   | IL18BP       | XLOC_149253 | 2544 coding | noncoding | coding    | coding    |
| MSTRG. 148135. 1  |              | XLOC_149257 | 299 coding  | coding    | noncoding | noncoding |
| MSTRG. 148144. 9  | INPPL1       | XLOC_149260 | 289 coding  | noncoding | noncoding | noncoding |
| MSTRG. 148142. 1  |              | XLOC_149263 | 272 coding  | noncoding | noncoding | noncoding |
| XM_006718734. 2   | ATG16L2      | XLOC_149283 | 3324 coding | coding    | coding    | coding    |
| MSTRG. 148479. 29 | FCHSD2       | XLOC_149283 | 1562 coding | coding    | noncoding | noncoding |
| XM_011545077. 2   | P2RY6        | XLOC_149294 | 3154 coding | coding    | coding    | coding    |
| NM_176798. 2      | P2RY6        | XLOC_149294 | 2649 coding | coding    | coding    | coding    |
| XR_950080. 2      | RELT         | XLOC_149298 | 3648 coding | coding    | coding    | coding    |
| MSTRG. 148225. 1  |              | XLOC_149306 | 263 coding  | noncoding | noncoding | noncoding |

|                 |               |             |             |           |           |           |
|-----------------|---------------|-------------|-------------|-----------|-----------|-----------|
| NM_001130036.2  | PLEKHB1       | XLOC_149307 | 1925 coding | coding    | coding    | coding    |
| MSTRG.148237.1  | MRPL48        | XLOC_149311 | 217 coding  | noncoding | noncoding | noncoding |
| MSTRG.148240.1  |               | XLOC_149318 | 211 coding  | noncoding | noncoding | noncoding |
| MSTRG.148315.8  | KCNE3         | XLOC_149332 | 3413 coding | coding    | noncoding | noncoding |
| MSTRG.148315.14 | KCNE3         | XLOC_149332 | 2160 coding | coding    | coding    | noncoding |
| XM_011544889.3  | RNF169        | XLOC_149350 | 7898 coding | coding    | coding    | coding    |
| MSTRG.148371.1  | SLCO2B1       | XLOC_149367 | 294 coding  | noncoding | noncoding | noncoding |
| MSTRG.148363.1  |               | XLOC_149368 | 397 coding  | noncoding | noncoding | noncoding |
| MSTRG.148381.1  | RPS3          | XLOC_149381 | 220 coding  | noncoding | noncoding | noncoding |
| MSTRG.148382.1  | RPS3          | XLOC_149382 | 295 coding  | noncoding | noncoding | noncoding |
| XM_017018227.2  | UVRAG         | XLOC_149399 | 4595 coding | coding    | coding    | coding    |
| MSTRG.148620.1  | UVRAG         | XLOC_149419 | 229 coding  | noncoding | noncoding | noncoding |
| MSTRG.148464.3  | THAP12        | XLOC_149441 | 2942 coding | coding    | noncoding | noncoding |
| MSTRG.148562.1  |               | XLOC_149478 | 293 coding  | noncoding | noncoding | noncoding |
| MSTRG.148641.1  | ACER3         | XLOC_149484 | 234 coding  | noncoding | noncoding | noncoding |
| MSTRG.148642.1  | ACER3         | XLOC_149485 | 236 coding  | noncoding | noncoding | noncoding |
| MSTRG.148696.1  | NDUFC2-KCTD14 | XLOC_149523 | 297 coding  | noncoding | noncoding | noncoding |
| MSTRG.148847.1  | TENM4         | XLOC_149561 | 285 coding  | noncoding | noncoding | noncoding |
| MSTRG.148714.1  |               | XLOC_149572 | 236 coding  | noncoding | noncoding | noncoding |
| MSTRG.148725.1  |               | XLOC_149580 | 226 coding  | noncoding | noncoding | noncoding |
| MSTRG.148732.1  |               | XLOC_149584 | 247 coding  | noncoding | noncoding | noncoding |
| MSTRG.148748.1  |               | XLOC_149587 | 207 coding  | noncoding | noncoding | noncoding |
| MSTRG.148757.1  |               | XLOC_149591 | 282 coding  | noncoding | noncoding | noncoding |
| MSTRG.148769.1  |               | XLOC_149597 | 263 coding  | noncoding | noncoding | noncoding |
| MSTRG.148780.1  |               | XLOC_149605 | 218 coding  | noncoding | noncoding | noncoding |
| MSTRG.148781.1  |               | XLOC_149606 | 204 coding  | noncoding | noncoding | noncoding |
| MSTRG.148787.1  |               | XLOC_149609 | 258 coding  | noncoding | noncoding | noncoding |
| MSTRG.148790.1  |               | XLOC_149610 | 234 coding  | noncoding | noncoding | noncoding |
| MSTRG.148803.1  |               | XLOC_149618 | 221 coding  | noncoding | noncoding | noncoding |
| MSTRG.148880.1  |               | XLOC_149628 | 299 coding  | noncoding | noncoding | noncoding |
| MSTRG.148956.1  | MIR4300HG     | XLOC_149637 | 244 coding  | noncoding | noncoding | noncoding |
| MSTRG.148962.1  | MIR4300HG     | XLOC_149640 | 240 coding  | coding    | noncoding | noncoding |
| MSTRG.148964.1  | MIR4300HG     | XLOC_149642 | 302 coding  | noncoding | noncoding | noncoding |
| MSTRG.148889.1  |               | XLOC_149649 | 270 coding  | noncoding | noncoding | noncoding |
| MSTRG.148966.1  | LINC02734     | XLOC_149656 | 277 coding  | noncoding | noncoding | noncoding |
| MSTRG.148970.1  | DDIAS         | XLOC_149667 | 217 coding  | noncoding | noncoding | noncoding |
| MSTRG.149119.1  |               | XLOC_149681 | 301 coding  | noncoding | noncoding | noncoding |
| NM_001300972.2  | ANKRD42       | XLOC_149685 | 2677 coding | coding    | coding    | coding    |
| MSTRG.149184.1  | DLG2          | XLOC_149691 | 257 coding  | noncoding | noncoding | noncoding |
| MSTRG.149199.1  | DLG2          | XLOC_149699 | 281 coding  | coding    | noncoding | noncoding |
| MSTRG.149203.1  | DLG2          | XLOC_149702 | 227 coding  | noncoding | noncoding | noncoding |
| MSTRG.149342.1  | DLG2          | XLOC_149799 | 413 coding  | coding    | noncoding | noncoding |
| MSTRG.149135.1  |               | XLOC_149805 | 242 coding  | coding    | noncoding | noncoding |

|                   |              |             |              |           |           |           |
|-------------------|--------------|-------------|--------------|-----------|-----------|-----------|
| MSTRG. 149148. 1  |              | XLOC_149816 | 288 coding   | noncoding | noncoding | noncoding |
| MSTRG. 149386. 16 | PICALM       | XLOC_149833 | 3446 coding  | coding    | noncoding | noncoding |
| MSTRG. 149349. 1  |              | XLOC_149834 | 313 coding   | noncoding | noncoding | noncoding |
| NM_001308007. 1   | EED          | XLOC_149839 | 2532 coding  | coding    | coding    | coding    |
| MSTRG. 149357. 10 | EED          | XLOC_149839 | 408 coding   | noncoding | noncoding | noncoding |
| MSTRG. 149373. 1  |              | XLOC_149848 | 253 coding   | coding    | noncoding | noncoding |
| MSTRG. 149430. 1  | ME3          | XLOC_149854 | 246 coding   | noncoding | noncoding | noncoding |
| MSTRG. 149509. 1  | LOC107984361 | XLOC_149910 | 248 coding   | noncoding | noncoding | noncoding |
| MSTRG. 149510. 1  | LOC107984361 | XLOC_149911 | 205 coding   | noncoding | noncoding | noncoding |
| MSTRG. 149520. 1  | LOC107984361 | XLOC_149917 | 374 coding   | coding    | noncoding | noncoding |
| MSTRG. 149666. 1  | LOC101929174 | XLOC_149962 | 203 coding   | noncoding | noncoding | noncoding |
| MSTRG. 149669. 1  | LOC101929174 | XLOC_149963 | 293 coding   | noncoding | noncoding | noncoding |
| MSTRG. 149687. 1  | LOC101929174 | XLOC_149965 | 410 coding   | coding    | noncoding | noncoding |
| MSTRG. 149592. 1  | GRM5         | XLOC_149972 | 265 coding   | noncoding | noncoding | noncoding |
| MSTRG. 149603. 1  | LOC107984363 | XLOC_149978 | 256 coding   | noncoding | noncoding | noncoding |
| MSTRG. 149623. 1  | NOX4         | XLOC_149982 | 280 coding   | noncoding | noncoding | noncoding |
| MSTRG. 149624. 1  | NOX4         | XLOC_149983 | 258 coding   | coding    | noncoding | noncoding |
| MSTRG. 149629. 1  | NOX4         | XLOC_149986 | 317 coding   | noncoding | noncoding | noncoding |
| MSTRG. 149614. 1  |              | XLOC_149989 | 317 coding   | noncoding | noncoding | noncoding |
| NM_001105522. 1   | TRIM49D2     | XLOC_150001 | 1651 coding  | coding    | coding    | coding    |
| MSTRG. 149694. 1  | TRIM51EP     | XLOC_150004 | 227 coding   | noncoding | noncoding | noncoding |
| MSTRG. 149697. 1  | TRIM49C      | XLOC_150008 | 463 coding   | noncoding | noncoding | noncoding |
| MSTRG. 149779. 1  | DISC1FP1     | XLOC_150013 | 275 coding   | noncoding | noncoding | noncoding |
| MSTRG. 149815. 1  | DISC1FP1     | XLOC_150020 | 287 coding   | coding    | noncoding | noncoding |
| MSTRG. 149732. 1  |              | XLOC_150030 | 287 coding   | coding    | noncoding | noncoding |
| MSTRG. 149758. 1  |              | XLOC_150044 | 310 coding   | coding    | noncoding | noncoding |
| MSTRG. 149766. 1  |              | XLOC_150045 | 257 coding   | noncoding | noncoding | noncoding |
| XM_017017186. 1   | FAT3         | XLOC_150049 | 16446 coding | coding    | noncoding | coding    |
| MSTRG. 149855. 1  | FAT3         | XLOC_150057 | 270 coding   | noncoding | noncoding | noncoding |
| MSTRG. 149836. 1  | MTNR1B       | XLOC_150061 | 279 coding   | noncoding | noncoding | noncoding |
| MSTRG. 149921. 1  |              | XLOC_150115 | 304 coding   | noncoding | noncoding | noncoding |
| MSTRG. 149930. 1  | HEPHL1       | XLOC_150119 | 256 coding   | noncoding | noncoding | noncoding |
| MSTRG. 149952. 1  | LOC105369435 | XLOC_150131 | 248 coding   | noncoding | noncoding | noncoding |
| MSTRG. 149961. 1  | GPR83        | XLOC_150139 | 226 coding   | noncoding | noncoding | noncoding |
| MSTRG. 149989. 1  | C11orf97     | XLOC_150150 | 268 coding   | noncoding | noncoding | noncoding |
| NM_130847. 3      | AMOTL1       | XLOC_150162 | 8980 coding  | coding    | coding    | coding    |
| MSTRG. 150013. 1  | LOC105369438 | XLOC_150163 | 245 coding   | noncoding | noncoding | noncoding |
| NM_018039. 3      | KDM4D        | XLOC_150182 | 2951 coding  | coding    | coding    | coding    |
| MSTRG. 150124. 2  | SESN3        | XLOC_150199 | 9796 coding  | coding    | coding    | noncoding |
| MSTRG. 150124. 4  | SESN3        | XLOC_150199 | 9047 coding  | coding    | coding    | noncoding |
| MSTRG. 150186. 14 | MTMR2        | XLOC_150249 | 1403 coding  | coding    | coding    | noncoding |
| MSTRG. 150204. 1  |              | XLOC_150287 | 314 coding   | noncoding | noncoding | noncoding |
| MSTRG. 150234. 1  |              | XLOC_150293 | 285 coding   | noncoding | noncoding | noncoding |

|                 |              |             |              |           |           |           |
|-----------------|--------------|-------------|--------------|-----------|-----------|-----------|
| MSTRG.150209.1  |              | XLOC_150295 | 293 coding   | noncoding | noncoding | noncoding |
| MSTRG.150203.1  |              | XLOC_150297 | 267 coding   | coding    | noncoding | noncoding |
| MSTRG.150248.1  |              | XLOC_150303 | 278 coding   | noncoding | coding    | noncoding |
| MSTRG.150257.1  |              | XLOC_150310 | 255 coding   | noncoding | noncoding | noncoding |
| MSTRG.150259.1  |              | XLOC_150311 | 216 coding   | noncoding | noncoding | noncoding |
| MSTRG.150263.1  |              | XLOC_150312 | 584 coding   | coding    | noncoding | noncoding |
| MSTRG.150277.1  |              | XLOC_150320 | 275 coding   | noncoding | noncoding | noncoding |
| MSTRG.150352.1  | CNTN5        | XLOC_150346 | 249 coding   | coding    | noncoding | noncoding |
| MSTRG.150356.1  | CNTN5        | XLOC_150348 | 275 coding   | noncoding | noncoding | noncoding |
| MSTRG.150368.1  | CNTN5        | XLOC_150356 | 387 coding   | noncoding | noncoding | noncoding |
| MSTRG.150369.1  | CNTN5        | XLOC_150357 | 247 coding   | noncoding | noncoding | noncoding |
| MSTRG.150382.1  | CNTN5        | XLOC_150364 | 273 coding   | noncoding | noncoding | noncoding |
| MSTRG.150295.1  |              | XLOC_150366 | 269 coding   | noncoding | noncoding | noncoding |
| MSTRG.150298.1  |              | XLOC_150368 | 297 coding   | coding    | noncoding | noncoding |
| MSTRG.150407.1  | ARHGAP42     | XLOC_150377 | 262 coding   | noncoding | noncoding | noncoding |
| MSTRG.150311.1  |              | XLOC_150389 | 651 coding   | noncoding | noncoding | noncoding |
| MSTRG.150452.1  | TRPC6        | XLOC_150398 | 339 coding   | noncoding | noncoding | noncoding |
| MSTRG.150432.1  |              | XLOC_150401 | 296 coding   | noncoding | noncoding | noncoding |
| MSTRG.150467.1  |              | XLOC_150418 | 339 coding   | noncoding | noncoding | noncoding |
| MSTRG.150486.1  | YAP1         | XLOC_150422 | 227 coding   | noncoding | noncoding | noncoding |
| MSTRG.150497.1  |              | XLOC_150440 | 318 coding   | noncoding | noncoding | noncoding |
| MSTRG.150502.1  | LOC101928477 | XLOC_150443 | 274 coding   | coding    | noncoding | noncoding |
| MSTRG.150528.1  | WTAPP1       | XLOC_150447 | 244 coding   | coding    | noncoding | noncoding |
| MSTRG.150529.1  | WTAPP1       | XLOC_150448 | 307 coding   | noncoding | noncoding | noncoding |
| MSTRG.150525.1  |              | XLOC_150451 | 240 coding   | coding    | noncoding | noncoding |
| MSTRG.150563.1  | DYNC2H1      | XLOC_150459 | 291 coding   | noncoding | noncoding | noncoding |
| MSTRG.150555.1  |              | XLOC_150470 | 300 coding   | noncoding | noncoding | noncoding |
| MSTRG.150591.1  |              | XLOC_150492 | 237 coding   | noncoding | noncoding | noncoding |
| MSTRG.150916.11 | CASP1        | XLOC_150526 | 2818 coding  | coding    | noncoding | noncoding |
| MSTRG.150799.1  | LOC105369469 | XLOC_150534 | 295 coding   | noncoding | noncoding | noncoding |
| MSTRG.150807.1  | LOC105369468 | XLOC_150537 | 240 coding   | noncoding | noncoding | noncoding |
| MSTRG.150809.1  | LOC105369468 | XLOC_150538 | 252 coding   | noncoding | noncoding | noncoding |
| XM_017017610.2  | GRIA4        | XLOC_150541 | 3696 coding  | coding    | coding    | coding    |
| NR_046356.1     | GRIA4        | XLOC_150541 | 5415 coding  | coding    | coding    | coding    |
| XM_011542776.3  | GRIA4        | XLOC_150541 | 11052 coding | coding    | coding    | coding    |
| MSTRG.150815.1  | GRIA4        | XLOC_150542 | 302 coding   | noncoding | noncoding | noncoding |
| MSTRG.150897.1  | GUCY1A2      | XLOC_150583 | 236 coding   | noncoding | noncoding | noncoding |
| MSTRG.150960.1  | SLC35F2      | XLOC_150624 | 286 coding   | noncoding | noncoding | noncoding |
| MSTRG.150947.1  |              | XLOC_150625 | 299 coding   | noncoding | noncoding | noncoding |
| MSTRG.150967.1  |              | XLOC_150629 | 231 coding   | noncoding | noncoding | noncoding |
| MSTRG.150968.1  |              | XLOC_150630 | 233 coding   | noncoding | noncoding | noncoding |
| MSTRG.151028.1  | EXPH5        | XLOC_150654 | 388 coding   | noncoding | noncoding | noncoding |
| MSTRG.151021.1  |              | XLOC_150662 | 246 coding   | noncoding | noncoding | noncoding |

|                  |              |             |             |           |           |           |
|------------------|--------------|-------------|-------------|-----------|-----------|-----------|
| MSTRG. 151187. 1 | DDX10        | XLOC_150677 | 288 coding  | noncoding | noncoding | noncoding |
| MSTRG. 151191. 1 |              | XLOC_150681 | 347 coding  | noncoding | noncoding | noncoding |
| MSTRG. 151041. 1 |              | XLOC_150683 | 276 coding  | noncoding | noncoding | noncoding |
| MSTRG. 151070. 1 |              | XLOC_150688 | 287 coding  | noncoding | noncoding | noncoding |
| MSTRG. 151078. 1 |              | XLOC_150693 | 319 coding  | noncoding | noncoding | noncoding |
| MSTRG. 151079. 1 |              | XLOC_150694 | 312 coding  | noncoding | noncoding | noncoding |
| MSTRG. 151054. 1 | LINC02732    | XLOC_150713 | 283 coding  | noncoding | noncoding | noncoding |
| MSTRG. 151056. 1 | LINC02732    | XLOC_150714 | 284 coding  | noncoding | noncoding | noncoding |
| MSTRG. 151137. 1 | LOC105369487 | XLOC_150721 | 259 coding  | noncoding | noncoding | noncoding |
| MSTRG. 151143. 1 |              | XLOC_150731 | 309 coding  | noncoding | noncoding | noncoding |
| MSTRG. 151159. 1 |              | XLOC_150734 | 298 coding  | noncoding | noncoding | noncoding |
| MSTRG. 151305. 1 | DIXDC1       | XLOC_150804 | 586 coding  | noncoding | noncoding | noncoding |
| MSTRG. 151313. 1 | DIXDC1       | XLOC_150807 | 305 coding  | noncoding | noncoding | noncoding |
| MSTRG. 151320. 1 | PIH1D2       | XLOC_150812 | 264 coding  | noncoding | noncoding | noncoding |
| MSTRG. 151284. 1 |              | XLOC_150816 | 404 coding  | noncoding | noncoding | noncoding |
| MSTRG. 151301. 1 | BCO2         | XLOC_150821 | 298 coding  | noncoding | noncoding | noncoding |
| MSTRG. 151425. 1 | LINC02762    | XLOC_150829 | 211 coding  | noncoding | noncoding | noncoding |
| MSTRG. 151352. 1 |              | XLOC_150837 | 217 coding  | noncoding | noncoding | noncoding |
| MSTRG. 151384. 1 |              | XLOC_150848 | 210 coding  | noncoding | noncoding | noncoding |
| MSTRG. 151385. 1 |              | XLOC_150849 | 256 coding  | coding    | noncoding | noncoding |
| MSTRG. 151497. 1 | NCAM1-AS1    | XLOC_150871 | 244 coding  | noncoding | noncoding | noncoding |
| MSTRG. 151548. 6 | USP28        | XLOC_150892 | 883 coding  | coding    | noncoding | noncoding |
| MSTRG. 151535. 1 | HTR3A        | XLOC_150897 | 262 coding  | noncoding | noncoding | noncoding |
| MSTRG. 151537. 1 |              | XLOC_150900 | 317 coding  | noncoding | noncoding | noncoding |
| MSTRG. 151562. 1 |              | XLOC_150922 | 303 coding  | noncoding | coding    | noncoding |
| MSTRG. 151589. 1 |              | XLOC_150930 | 275 coding  | noncoding | noncoding | noncoding |
| MSTRG. 151610. 1 | NXPE4        | XLOC_150938 | 202 coding  | noncoding | noncoding | noncoding |
| MSTRG. 151647. 1 | LOC107987165 | XLOC_150960 | 237 coding  | noncoding | noncoding | noncoding |
| MSTRG. 151630. 1 |              | XLOC_150967 | 240 coding  | coding    | noncoding | noncoding |
| MSTRG. 151669. 1 |              | XLOC_150980 | 280 coding  | noncoding | noncoding | noncoding |
| MSTRG. 151711. 1 |              | XLOC_150991 | 308 coding  | noncoding | noncoding | noncoding |
| MSTRG. 151883. 2 | SIK3         | XLOC_151003 | 3282 coding | coding    | noncoding | noncoding |
| XR_001747824. 2  | RNF214       | XLOC_151013 | 2277 coding | noncoding | coding    | coding    |
| MSTRG. 151765. 1 | RNF214       | XLOC_151014 | 366 coding  | noncoding | noncoding | noncoding |
| MSTRG. 151819. 1 | CEP164       | XLOC_151020 | 228 coding  | noncoding | noncoding | noncoding |
| MSTRG. 151830. 1 | CEP164       | XLOC_151023 | 459 coding  | noncoding | noncoding | noncoding |
| MSTRG. 151831. 1 | CEP164       | XLOC_151024 | 232 coding  | noncoding | noncoding | noncoding |
| MSTRG. 151778. 1 | DSCAML1      | XLOC_151028 | 314 coding  | noncoding | noncoding | noncoding |
| MSTRG. 151789. 1 | DSCAML1      | XLOC_151035 | 253 coding  | noncoding | noncoding | noncoding |
| MSTRG. 151834. 1 |              | XLOC_151092 | 282 coding  | noncoding | noncoding | noncoding |
| MSTRG. 151970. 1 | UBE4A        | XLOC_151105 | 253 coding  | noncoding | noncoding | noncoding |
| MSTRG. 151966. 1 |              | XLOC_151110 | 225 coding  | noncoding | noncoding | noncoding |
| MSTRG. 151985. 1 | PHLDB1       | XLOC_151126 | 218 coding  | noncoding | noncoding | noncoding |

|                 |              |             |              |           |           |           |
|-----------------|--------------|-------------|--------------|-----------|-----------|-----------|
| MSTRG.152005.1  | CXCR5        | XLOC_151132 | 10287 coding | coding    | coding    | coding    |
| MSTRG.152008.8  | CCDC84       | XLOC_151137 | 2024 coding  | coding    | coding    | coding    |
| MSTRG.152068.1  | USP2         | XLOC_151169 | 208 coding   | noncoding | noncoding | noncoding |
| MSTRG.152110.1  |              | XLOC_151194 | 318 coding   | noncoding | noncoding | noncoding |
| XM_006718805.3  | ARHGEF12     | XLOC_151214 | 9211 coding  | coding    | coding    | coding    |
| MSTRG.152223.1  |              | XLOC_151250 | 259 coding   | noncoding | noncoding | noncoding |
| MSTRG.152285.1  |              | XLOC_151286 | 247 coding   | noncoding | noncoding | noncoding |
| MSTRG.152333.1  | MIR100HG     | XLOC_151302 | 307 coding   | noncoding | noncoding | noncoding |
| MSTRG.152366.1  | JHY          | XLOC_151329 | 288 coding   | noncoding | noncoding | noncoding |
| MSTRG.152373.1  |              | XLOC_151346 | 249 coding   | noncoding | noncoding | noncoding |
| MSTRG.152518.1  | GRAMD1B      | XLOC_151352 | 424 coding   | noncoding | noncoding | noncoding |
| MSTRG.152447.1  |              | XLOC_151356 | 270 coding   | noncoding | noncoding | noncoding |
| MSTRG.152468.1  |              | XLOC_151374 | 323 coding   | noncoding | noncoding | noncoding |
| MSTRG.152488.1  | VWA5A        | XLOC_151377 | 312 coding   | noncoding | noncoding | noncoding |
| MSTRG.152493.1  | OR8B3        | XLOC_151388 | 311 coding   | noncoding | noncoding | noncoding |
| MSTRG.152498.1  |              | XLOC_151394 | 255 coding   | noncoding | noncoding | noncoding |
| XM_017018350.1  | CCDC15       | XLOC_151423 | 2555 coding  | noncoding | coding    | coding    |
| MSTRG.152563.1  |              | XLOC_151434 | 205 coding   | noncoding | noncoding | noncoding |
| MSTRG.152622.1  | CHEK1        | XLOC_151457 | 295 coding   | noncoding | noncoding | noncoding |
| XR_001748438.1  | LOC105369561 | XLOC_151504 | 11178 coding | noncoding | coding    | coding    |
| NR_120578.1     | LOC101929473 | XLOC_151512 | 2323 coding  | noncoding | noncoding | noncoding |
| MSTRG.152656.1  | LOC101929473 | XLOC_151514 | 278 coding   | noncoding | noncoding | noncoding |
| MSTRG.152679.1  |              | XLOC_151528 | 262 coding   | noncoding | noncoding | noncoding |
| MSTRG.152822.2  | ETS1         | XLOC_151560 | 9530 coding  | coding    | coding    | noncoding |
| MSTRG.152854.1  | TP53AIP1     | XLOC_151590 | 388 coding   | noncoding | noncoding | noncoding |
| MSTRG.152990.1  | ARHGAP32     | XLOC_151622 | 388 coding   | noncoding | noncoding | noncoding |
| MSTRG.152860.1  |              | XLOC_151672 | 230 coding   | noncoding | noncoding | noncoding |
| MSTRG.152953.1  | TMEM45B      | XLOC_151730 | 232 coding   | noncoding | noncoding | noncoding |
| NM_001328686.2  | APLP2        | XLOC_151736 | 3634 coding  | coding    | coding    | coding    |
| MSTRG.153109.5  | ZBTB44       | XLOC_151747 | 9070 coding  | coding    | coding    | noncoding |
| MSTRG.153109.12 | ZBTB44       | XLOC_151747 | 1782 coding  | coding    | noncoding | noncoding |
| MSTRG.153116.1  | ZBTB44-DT    | XLOC_151749 | 286 coding   | noncoding | noncoding | noncoding |
| MSTRG.153094.1  |              | XLOC_151753 | 288 coding   | noncoding | noncoding | noncoding |
| MSTRG.153102.1  |              | XLOC_151761 | 219 coding   | noncoding | noncoding | noncoding |
| MSTRG.153141.9  | SNX19        | XLOC_151767 | 3678 coding  | coding    | coding    | noncoding |
| MSTRG.153121.1  |              | XLOC_151768 | 536 coding   | coding    | noncoding | noncoding |
| XM_017017852.2  | NTM          | XLOC_151775 | 8139 coding  | coding    | coding    | coding    |
| XM_017017863.1  | NTM          | XLOC_151775 | 6446 coding  | coding    | coding    | coding    |
| MSTRG.153159.1  | NTM          | XLOC_151776 | 223 coding   | noncoding | noncoding | noncoding |
| MSTRG.153190.1  | NTM          | XLOC_151789 | 312 coding   | noncoding | noncoding | noncoding |
| MSTRG.153211.1  | OPCML        | XLOC_151797 | 281 coding   | noncoding | noncoding | noncoding |
| MSTRG.153154.1  |              | XLOC_151817 | 241 coding   | noncoding | noncoding | noncoding |
| MSTRG.153266.2  | IGSF9B       | XLOC_151828 | 323 coding   | noncoding | noncoding | noncoding |

|                |              |             |             |           |           |           |
|----------------|--------------|-------------|-------------|-----------|-----------|-----------|
| XM_024448438.1 | ACAD8        | XLOC_151835 | 2059 coding | coding    | coding    | coding    |
| MSTRG.153354.1 | GLB1L3       | XLOC_151838 | 207 coding  | noncoding | noncoding | noncoding |
| MSTRG.153315.1 |              | XLOC_151864 | 238 coding  | noncoding | noncoding | noncoding |
| MSTRG.142360.1 |              | XLOC_151884 | 299 coding  | noncoding | noncoding | noncoding |
| MSTRG.142367.1 | PGGHG        | XLOC_151889 | 4580 coding | coding    | coding    | coding    |
| MSTRG.142369.1 |              | XLOC_151891 | 287 coding  | noncoding | noncoding | noncoding |
| MSTRG.142370.6 | IFITM2       | XLOC_151892 | 1176 coding | coding    | coding    | noncoding |
| MSTRG.142391.1 | EPS8L2       | XLOC_151926 | 225 coding  | coding    | noncoding | noncoding |
| MSTRG.142434.1 | AP2A2        | XLOC_151948 | 254 coding  | noncoding | noncoding | noncoding |
| MSTRG.142443.1 | MUC5B        | XLOC_151955 | 246 coding  | coding    | noncoding | noncoding |
| MSTRG.142446.1 | MUC5B        | XLOC_151956 | 216 coding  | noncoding | noncoding | noncoding |
| NM_019009.4    | TOLLIP       | XLOC_151957 | 3627 coding | coding    | coding    | coding    |
| MSTRG.142457.1 | LINC02689    | XLOC_151961 | 249 coding  | noncoding | noncoding | noncoding |
| NM_001170820.4 | IFITM10      | XLOC_151982 | 3714 coding | coding    | coding    | coding    |
| MSTRG.142695.1 | ART1         | XLOC_152076 | 381 coding  | coding    | coding    | noncoding |
| MSTRG.142763.3 | STIM1        | XLOC_152095 | 931 coding  | noncoding | coding    | noncoding |
| MSTRG.142719.1 |              | XLOC_152107 | 297 coding  | noncoding | noncoding | noncoding |
| NM_001005329.1 | OR51A4       | XLOC_152137 | 942 coding  | coding    | coding    | coding    |
| NM_000518.5    | HBB          | XLOC_152143 | 628 coding  | coding    | noncoding | coding    |
| NR_001589.1    | HBBP1        | XLOC_152146 | 660 coding  | coding    | coding    | noncoding |
| NM_000559.2    | HBG1         | XLOC_152148 | 584 coding  | coding    | coding    | coding    |
| MSTRG.142808.1 | HBG2         | XLOC_152148 | 637 coding  | coding    | coding    | coding    |
| MSTRG.142817.1 | OR51B5       | XLOC_152157 | 321 coding  | coding    | noncoding | noncoding |
| MSTRG.142823.1 | OR51B5       | XLOC_152159 | 206 coding  | noncoding | noncoding | noncoding |
| NM_033092.3    | TRIM5        | XLOC_152169 | 3624 coding | coding    | coding    | coding    |
| NM_001001922.2 | OR52N5       | XLOC_152188 | 1034 coding | coding    | coding    | coding    |
| MSTRG.142916.1 | OR52N2       | XLOC_152191 | 253 coding  | coding    | noncoding | noncoding |
| MSTRG.142947.1 |              | XLOC_152207 | 312 coding  | coding    | noncoding | noncoding |
| MSTRG.142956.1 |              | XLOC_152212 | 269 coding  | noncoding | noncoding | noncoding |
| MSTRG.143002.1 |              | XLOC_152227 | 223 coding  | noncoding | noncoding | noncoding |
| MSTRG.143126.1 | RRP8         | XLOC_152255 | 296 coding  | noncoding | noncoding | noncoding |
| MSTRG.143022.1 |              | XLOC_152282 | 530 coding  | noncoding | noncoding | noncoding |
| MSTRG.143027.1 | OR10A5       | XLOC_152285 | 374 coding  | noncoding | noncoding | noncoding |
| MSTRG.143065.1 | ZNF215       | XLOC_152293 | 222 coding  | noncoding | noncoding | noncoding |
| MSTRG.143165.1 | RIC3         | XLOC_152329 | 681 coding  | noncoding | noncoding | noncoding |
| MSTRG.143285.1 | ST5          | XLOC_152352 | 273 coding  | noncoding | noncoding | noncoding |
| MSTRG.143301.1 | ST5          | XLOC_152359 | 358 coding  | coding    | noncoding | noncoding |
| NM_001286095.1 | TMEM9B       | XLOC_152363 | 1733 coding | coding    | coding    | noncoding |
| XM_024448608.1 | NRIP3        | XLOC_152369 | 3824 coding | coding    | coding    | coding    |
| MSTRG.143245.1 |              | XLOC_152374 | 205 coding  | noncoding | noncoding | noncoding |
| MSTRG.143253.1 | LOC105376542 | XLOC_152377 | 282 coding  | noncoding | noncoding | noncoding |
| NM_001243254.2 | DENND5A      | XLOC_152379 | 4957 coding | coding    | coding    | coding    |
| MSTRG.143308.1 | TMEM41B      | XLOC_152399 | 258 coding  | noncoding | noncoding | noncoding |

|                   |              |             |             |           |           |           |
|-------------------|--------------|-------------|-------------|-----------|-----------|-----------|
| MSTRG. 143323. 1  |              | XLOC_152407 | 206 coding  | noncoding | noncoding | noncoding |
| MSTRG. 143585. 1  | LOC101928008 | XLOC_152433 | 473 coding  | noncoding | noncoding | noncoding |
| MSTRG. 143663. 1  | CAND1.11     | XLOC_152502 | 295 coding  | noncoding | noncoding | noncoding |
| NM_001172705. 1   | EIF4G2       | XLOC_152520 | 4028 coding | coding    | coding    | coding    |
| NM_001042559. 2   | EIF4G2       | XLOC_152520 | 3797 coding | coding    | coding    | coding    |
| MSTRG. 143382. 1  | LOC105379882 | XLOC_152533 | 339 coding  | noncoding | noncoding | noncoding |
| MSTRG. 143384. 1  |              | XLOC_152534 | 287 coding  | noncoding | noncoding | noncoding |
| NM_198516. 3      | GALNT18      | XLOC_152543 | 2503 coding | coding    | coding    | coding    |
| MSTRG. 143484. 1  | LINC02547    | XLOC_152567 | 259 coding  | noncoding | noncoding | noncoding |
| MSTRG. 143690. 13 | MICAL2       | XLOC_152572 | 4536 coding | noncoding | coding    | coding    |
| MSTRG. 143526. 1  | PARVA        | XLOC_152579 | 240 coding  | noncoding | noncoding | noncoding |
| MSTRG. 143556. 1  | TEAD1        | XLOC_152590 | 236 coding  | noncoding | noncoding | noncoding |
| MSTRG. 143667. 1  |              | XLOC_152603 | 410 coding  | noncoding | noncoding | noncoding |
| MSTRG. 143681. 1  |              | XLOC_152615 | 255 coding  | coding    | noncoding | noncoding |
| MSTRG. 143684. 1  |              | XLOC_152617 | 253 coding  | noncoding | noncoding | noncoding |
| MSTRG. 143726. 3  | FAR1         | XLOC_152621 | 5285 coding | coding    | noncoding | noncoding |
| MSTRG. 143721. 1  | LINC02548    | XLOC_152623 | 282 coding  | noncoding | noncoding | noncoding |
| MSTRG. 143765. 1  | SPON1        | XLOC_152638 | 260 coding  | noncoding | noncoding | noncoding |
| MSTRG. 143852. 1  |              | XLOC_152712 | 324 coding  | coding    | noncoding | noncoding |
| MSTRG. 143855. 1  |              | XLOC_152714 | 234 coding  | noncoding | noncoding | noncoding |
| MSTRG. 143974. 1  | SOX6         | XLOC_152767 | 220 coding  | noncoding | noncoding | noncoding |
| XM_024448361. 1   | PLEKHA7      | XLOC_152775 | 7163 coding | coding    | coding    | coding    |
| NM_001017. 3      | RPS13        | XLOC_152783 | 527 coding  | coding    | coding    | coding    |
| MSTRG. 143998. 1  | PIK3C2A      | XLOC_152787 | 294 coding  | noncoding | noncoding | noncoding |
| MSTRG. 143995. 1  |              | XLOC_152798 | 276 coding  | noncoding | noncoding | noncoding |
| MSTRG. 143996. 1  |              | XLOC_152799 | 246 coding  | noncoding | noncoding | noncoding |
| MSTRG. 144021. 1  | NUCB2        | XLOC_152800 | 238 coding  | noncoding | noncoding | noncoding |
| MSTRG. 144030. 1  |              | XLOC_152819 | 372 coding  | noncoding | noncoding | noncoding |
| MSTRG. 144061. 1  | MRGPRX3      | XLOC_152848 | 263 coding  | coding    | noncoding | noncoding |
| MSTRG. 144192. 1  | LDHAL6A      | XLOC_152855 | 229 coding  | noncoding | noncoding | noncoding |
| MSTRG. 144194. 1  | LDHAL6A      | XLOC_152857 | 278 coding  | noncoding | noncoding | noncoding |
| MSTRG. 144205. 1  | UEVLD        | XLOC_152867 | 214 coding  | noncoding | noncoding | noncoding |
| MSTRG. 144208. 1  | LOC112268073 | XLOC_152870 | 223 coding  | noncoding | noncoding | noncoding |
| XM_011519919. 2   | SPTY2D1      | XLOC_152872 | 5592 coding | coding    | coding    | coding    |
| MSTRG. 144155. 1  |              | XLOC_152874 | 279 coding  | noncoding | noncoding | noncoding |
| MSTRG. 144156. 1  |              | XLOC_152875 | 264 coding  | noncoding | noncoding | noncoding |
| MSTRG. 144158. 1  |              | XLOC_152876 | 357 coding  | noncoding | noncoding | noncoding |
| MSTRG. 144183. 1  |              | XLOC_152890 | 325 coding  | noncoding | noncoding | noncoding |
| MSTRG. 144190. 1  |              | XLOC_152893 | 302 coding  | noncoding | noncoding | noncoding |
| MSTRG. 144184. 1  |              | XLOC_152894 | 238 coding  | noncoding | noncoding | noncoding |
| MSTRG. 144239. 1  | CSRP3-AS1    | XLOC_152906 | 227 coding  | coding    | noncoding | noncoding |
| MSTRG. 144284. 1  | NAV2         | XLOC_152922 | 222 coding  | noncoding | noncoding | noncoding |
| MSTRG. 144299. 1  | NAV2         | XLOC_152934 | 274 coding  | noncoding | noncoding | noncoding |

|                  |              |             |             |           |           |           |
|------------------|--------------|-------------|-------------|-----------|-----------|-----------|
| MSTRG. 144258. 1 |              | XLOC_152960 | 260 coding  | noncoding | noncoding | noncoding |
| MSTRG. 144360. 1 | NELL1        | XLOC_152978 | 253 coding  | noncoding | noncoding | noncoding |
| MSTRG. 144364. 1 | NELL1        | XLOC_152981 | 279 coding  | noncoding | noncoding | noncoding |
| MSTRG. 144389. 1 | LOC102723370 | XLOC_152997 | 538 coding  | noncoding | noncoding | noncoding |
| MSTRG. 144485. 1 |              | XLOC_153108 | 267 coding  | noncoding | noncoding | noncoding |
| MSTRG. 144487. 1 |              | XLOC_153110 | 319 coding  | noncoding | noncoding | noncoding |
| MSTRG. 144501. 1 |              | XLOC_153118 | 281 coding  | noncoding | noncoding | noncoding |
| MSTRG. 144508. 1 |              | XLOC_153121 | 231 coding  | noncoding | noncoding | noncoding |
| MSTRG. 144546. 1 | LUZP2        | XLOC_153128 | 311 coding  | coding    | noncoding | noncoding |
| MSTRG. 144565. 1 | LUZP2        | XLOC_153140 | 319 coding  | noncoding | noncoding | noncoding |
| MSTRG. 144524. 1 |              | XLOC_153143 | 224 coding  | coding    | noncoding | noncoding |
| MSTRG. 144647. 1 |              | XLOC_153152 | 277 coding  | noncoding | noncoding | noncoding |
| MSTRG. 144653. 1 |              | XLOC_153153 | 370 coding  | noncoding | noncoding | noncoding |
| MSTRG. 144664. 1 | LINC02699    | XLOC_153156 | 265 coding  | noncoding | noncoding | noncoding |
| MSTRG. 144649. 1 |              | XLOC_153160 | 222 coding  | noncoding | noncoding | noncoding |
| MSTRG. 144670. 1 |              | XLOC_153178 | 208 coding  | noncoding | noncoding | noncoding |
| MSTRG. 144674. 1 |              | XLOC_153180 | 280 coding  | coding    | noncoding | noncoding |
| MSTRG. 144746. 1 | LGR4         | XLOC_153192 | 267 coding  | noncoding | noncoding | noncoding |
| NM_031217. 4     | KIF18A       | XLOC_153238 | 3417 coding | coding    | coding    | coding    |
| MSTRG. 144877. 1 |              | XLOC_153307 | 240 coding  | noncoding | noncoding | noncoding |
| MSTRG. 145155. 1 | DCDC1        | XLOC_153313 | 265 coding  | noncoding | noncoding | noncoding |
| MSTRG. 145161. 1 | DCDC1        | XLOC_153315 | 441 coding  | noncoding | noncoding | noncoding |
| MSTRG. 144975. 1 |              | XLOC_153351 | 283 coding  | noncoding | noncoding | noncoding |
| NM_001033506. 1  | CSTF3        | XLOC_153371 | 749 coding  | noncoding | noncoding | noncoding |
| MSTRG. 145077. 1 | HIPK3        | XLOC_153393 | 7929 coding | coding    | coding    | noncoding |
| MSTRG. 145063. 1 | KIAA1549L    | XLOC_153399 | 263 coding  | noncoding | noncoding | noncoding |
| MSTRG. 145065. 1 | KIAA1549L    | XLOC_153401 | 241 coding  | noncoding | noncoding | noncoding |
| MSTRG. 145071. 1 | LOC105376617 | XLOC_153403 | 290 coding  | noncoding | noncoding | noncoding |
| NM_012175. 4     | FBXO3        | XLOC_153407 | 2403 coding | coding    | coding    | coding    |
| XM_011519981. 3  | FBXO3        | XLOC_153407 | 3303 coding | coding    | coding    | coding    |
| MSTRG. 145258. 1 | ABTB2        | XLOC_153425 | 237 coding  | noncoding | noncoding | noncoding |
| MSTRG. 145274. 1 | ABTB2        | XLOC_153429 | 483 coding  | noncoding | noncoding | noncoding |
| NM_198381. 2     | ELF5         | XLOC_153438 | 2380 coding | coding    | coding    | coding    |
| MSTRG. 145144. 1 | EHF          | XLOC_153445 | 290 coding  | noncoding | noncoding | noncoding |
| MSTRG. 145392. 1 | LOC102723568 | XLOC_153448 | 256 coding  | noncoding | noncoding | noncoding |
| MSTRG. 145413. 1 | APIP         | XLOC_153457 | 285 coding  | noncoding | noncoding | noncoding |
| MSTRG. 145414. 2 | PDHX         | XLOC_153458 | 1069 coding | coding    | coding    | noncoding |
| MSTRG. 145500. 1 |              | XLOC_153538 | 271 coding  | noncoding | noncoding | noncoding |
| MSTRG. 145538. 1 |              | XLOC_153557 | 207 coding  | noncoding | noncoding | noncoding |
| MSTRG. 145543. 1 |              | XLOC_153559 | 281 coding  | noncoding | noncoding | noncoding |
| MSTRG. 145551. 1 |              | XLOC_153563 | 265 coding  | noncoding | noncoding | noncoding |
| MSTRG. 145554. 1 |              | XLOC_153565 | 311 coding  | noncoding | noncoding | noncoding |
| MSTRG. 145565. 1 |              | XLOC_153571 | 277 coding  | noncoding | noncoding | noncoding |

|                  |              |             |             |           |           |           |
|------------------|--------------|-------------|-------------|-----------|-----------|-----------|
| MSTRG. 145584. 1 | LOC105376637 | XLOC_153575 | 295 coding  | noncoding | noncoding | noncoding |
| MSTRG. 145593. 1 | LOC105376637 | XLOC_153579 | 240 coding  | noncoding | noncoding | noncoding |
| MSTRG. 145734. 1 | LRRC4C       | XLOC_153588 | 282 coding  | noncoding | noncoding | noncoding |
| MSTRG. 145737. 1 | LRRC4C       | XLOC_153589 | 275 coding  | noncoding | noncoding | noncoding |
| MSTRG. 145747. 1 | LRRC4C       | XLOC_153594 | 299 coding  | noncoding | noncoding | noncoding |
| MSTRG. 145750. 1 | LRRC4C       | XLOC_153597 | 286 coding  | noncoding | noncoding | noncoding |
| MSTRG. 145752. 1 | LRRC4C       | XLOC_153598 | 289 coding  | noncoding | noncoding | noncoding |
| MSTRG. 145603. 1 |              | XLOC_153607 | 284 coding  | noncoding | noncoding | noncoding |
| MSTRG. 145618. 1 | LINC01499    | XLOC_153613 | 453 coding  | noncoding | noncoding | noncoding |
| MSTRG. 145647. 1 |              | XLOC_153630 | 293 coding  | noncoding | noncoding | noncoding |
| MSTRG. 145703. 1 |              | XLOC_153637 | 321 coding  | noncoding | noncoding | noncoding |
| MSTRG. 145717. 1 |              | XLOC_153641 | 304 coding  | coding    | noncoding | noncoding |
| MSTRG. 145779. 1 |              | XLOC_153646 | 247 coding  | noncoding | noncoding | noncoding |
| MSTRG. 145830. 1 | HSD17B12     | XLOC_153650 | 268 coding  | noncoding | noncoding | noncoding |
| MSTRG. 145857. 2 | ACCS         | XLOC_153665 | 690 coding  | noncoding | noncoding | noncoding |
| MSTRG. 145868. 1 |              | XLOC_153683 | 497 coding  | noncoding | noncoding | noncoding |
| MSTRG. 145878. 1 |              | XLOC_153697 | 296 coding  | noncoding | noncoding | noncoding |
| MSTRG. 145984. 1 |              | XLOC_153751 | 247 coding  | noncoding | noncoding | noncoding |
| MSTRG. 146044. 1 | AMBRA1       | XLOC_153837 | 234 coding  | noncoding | noncoding | noncoding |
| XM_011520095. 2  | ARHGAP1      | XLOC_153841 | 4150 coding | coding    | coding    | coding    |
| MSTRG. 146115. 1 | F2           | XLOC_153844 | 304 coding  | coding    | coding    | noncoding |
| MSTRG. 146116. 1 | F2           | XLOC_153845 | 242 coding  | noncoding | noncoding | noncoding |
| MSTRG. 146118. 1 |              | XLOC_153856 | 269 coding  | noncoding | noncoding | noncoding |
| MSTRG. 146183. 1 | RAPSN        | XLOC_153883 | 261 coding  | noncoding | noncoding | noncoding |
| XM_017017109. 1  | CELF1        | XLOC_153885 | 7978 coding | coding    | coding    | coding    |
| NM_001317231. 1  | MTCH2        | XLOC_153888 | 2628 coding | coding    | coding    | coding    |
| MSTRG. 146212. 1 |              | XLOC_153893 | 250 coding  | noncoding | noncoding | noncoding |
| MSTRG. 146305. 1 | PTPRJ        | XLOC_153896 | 5397 coding | noncoding | noncoding | noncoding |
| NM_001348223. 1  | OR4C5        | XLOC_153904 | 1192 coding | coding    | coding    | coding    |
| MSTRG. 146234. 1 |              | XLOC_153912 | 484 coding  | noncoding | noncoding | noncoding |
| MSTRG. 146257. 1 | FOLH1        | XLOC_153919 | 278 coding  | noncoding | noncoding | noncoding |
| NR_003034. 2     | LOC441601    | XLOC_153937 | 1015 coding | coding    | coding    | noncoding |
| MSTRG. 146278. 1 | LOC441601    | XLOC_153938 | 260 coding  | noncoding | noncoding | noncoding |
| MSTRG. 146286. 1 | LINC02750    | XLOC_153939 | 274 coding  | noncoding | noncoding | noncoding |
| MSTRG. 146296. 1 |              | XLOC_153945 | 268 coding  | noncoding | noncoding | noncoding |
| MSTRG. 146390. 1 |              | XLOC_153969 | 262 coding  | noncoding | noncoding | noncoding |
| MSTRG. 146392. 1 |              | XLOC_153972 | 471 coding  | noncoding | noncoding | noncoding |
| MSTRG. 146396. 1 |              | XLOC_153975 | 260 coding  | coding    | noncoding | noncoding |
| MSTRG. 146410. 1 | OR5AS1       | XLOC_153987 | 303 coding  | coding    | noncoding | noncoding |
| MSTRG. 146419. 1 |              | XLOC_154001 | 435 coding  | noncoding | noncoding | noncoding |
| MSTRG. 146427. 1 |              | XLOC_154008 | 235 coding  | noncoding | noncoding | noncoding |
| MSTRG. 146431. 1 | LOC105369309 | XLOC_154010 | 256 coding  | noncoding | noncoding | noncoding |
| MSTRG. 146449. 1 | LOC105369309 | XLOC_154017 | 233 coding  | noncoding | noncoding | noncoding |

|                  |              |             |              |           |           |           |
|------------------|--------------|-------------|--------------|-----------|-----------|-----------|
| MSTRG. 146434. 1 |              | XLOC_154020 | 241 coding   | noncoding | noncoding | noncoding |
| MSTRG. 146474. 1 | SLC43A1      | XLOC_154033 | 245 coding   | noncoding | noncoding | noncoding |
| MSTRG. 146529. 1 | OR9Q1        | XLOC_154062 | 215 coding   | noncoding | noncoding | noncoding |
| NM_001005211. 1  | OR9I1        | XLOC_154065 | 945 coding   | coding    | coding    | coding    |
| MSTRG. 146535. 1 | OR9Q1        | XLOC_154066 | 226 coding   | noncoding | coding    | noncoding |
| NM_001004471. 2  | OR10Q1       | XLOC_154068 | 1037 coding  | coding    | coding    | coding    |
| MSTRG. 146522. 1 |              | XLOC_154070 | 316 coding   | noncoding | noncoding | noncoding |
| MSTRG. 146633. 1 | LOC283194    | XLOC_154113 | 208 coding   | noncoding | noncoding | noncoding |
| XR_001748223. 1  | LOC105369315 | XLOC_154116 | 11704 coding | coding    | noncoding | noncoding |
| MSTRG. 146693. 1 |              | XLOC_154141 | 250 coding   | noncoding | noncoding | noncoding |
| MSTRG. 146707. 1 |              | XLOC_154163 | 252 coding   | noncoding | noncoding | noncoding |
| NM_152851. 2     | MS4A6A       | XLOC_154188 | 1562 coding  | coding    | noncoding | coding    |
| XM_024448653. 1  | MS4A6A       | XLOC_154188 | 1057 coding  | coding    | coding    | coding    |
| MSTRG. 146775. 1 |              | XLOC_154205 | 291 coding   | noncoding | noncoding | noncoding |
| MSTRG. 146788. 1 | LINC00301    | XLOC_154208 | 270 coding   | noncoding | noncoding | noncoding |
| MSTRG. 146785. 1 |              | XLOC_154209 | 400 coding   | noncoding | noncoding | noncoding |
| MSTRG. 146802. 1 |              | XLOC_154214 | 280 coding   | noncoding | noncoding | noncoding |
| NM_001161452. 2  | CYB561A3     | XLOC_154241 | 2984 coding  | coding    | coding    | coding    |
| MSTRG. 146896. 1 | MIR4488      | XLOC_154252 | 227 coding   | noncoding | noncoding | noncoding |
| XM_005274387. 4  | SYT7         | XLOC_154253 | 5502 coding  | coding    | coding    | coding    |
| NM_002032. 3     | FTH1         | XLOC_154276 | 1203 coding  | coding    | coding    | coding    |
| MSTRG. 146994. 1 |              | XLOC_154300 | 293 coding   | noncoding | coding    | noncoding |
| MSTRG. 146997. 1 |              | XLOC_154302 | 300 coding   | noncoding | noncoding | noncoding |
| MSTRG. 147011. 1 |              | XLOC_154303 | 239 coding   | noncoding | noncoding | noncoding |
| MSTRG. 147015. 1 | LOC102723765 | XLOC_154317 | 343 coding   | noncoding | noncoding | noncoding |
| XM_017018270. 1  | AHNAK        | XLOC_154318 | 18556 coding | noncoding | noncoding | coding    |
| MSTRG. 147054. 1 | ROM1         | XLOC_154327 | 215 coding   | noncoding | noncoding | noncoding |
| MSTRG. 147148. 5 | TTC9C        | XLOC_154341 | 1452 coding  | noncoding | coding    | noncoding |
| MSTRG. 147148. 6 | TTC9C        | XLOC_154341 | 2278 coding  | noncoding | coding    | noncoding |
| MSTRG. 147067. 1 |              | XLOC_154364 | 274 coding   | noncoding | noncoding | noncoding |
| MSTRG. 147077. 1 | LOC105369333 | XLOC_154369 | 279 coding   | noncoding | noncoding | noncoding |
| MSTRG. 147069. 1 |              | XLOC_154370 | 250 coding   | noncoding | noncoding | noncoding |
| MSTRG. 147082. 1 |              | XLOC_154374 | 285 coding   | coding    | noncoding | noncoding |
| MSTRG. 147083. 1 |              | XLOC_154375 | 313 coding   | noncoding | noncoding | noncoding |
| MSTRG. 147097. 1 |              | XLOC_154376 | 294 coding   | noncoding | noncoding | noncoding |
| XM_017017686. 1  | SLC22A25     | XLOC_154379 | 4809 coding  | coding    | coding    | coding    |
| MSTRG. 147107. 1 | SLC22A25     | XLOC_154380 | 262 coding   | noncoding | noncoding | noncoding |
| MSTRG. 147109. 1 | SLC22A25     | XLOC_154381 | 300 coding   | noncoding | noncoding | noncoding |
| MSTRG. 147113. 1 | SLC22A9      | XLOC_154384 | 253 coding   | noncoding | noncoding | noncoding |
| MSTRG. 147172. 1 | PLAAT3       | XLOC_154399 | 286 coding   | noncoding | noncoding | noncoding |
| MSTRG. 147176. 1 | ATL3         | XLOC_154401 | 308 coding   | noncoding | noncoding | noncoding |
| MSTRG. 147179. 1 | ATL3         | XLOC_154404 | 280 coding   | noncoding | noncoding | noncoding |
| MSTRG. 147180. 1 | ATL3         | XLOC_154405 | 373 coding   | noncoding | noncoding | noncoding |

|                   |              |             |              |           |           |           |
|-------------------|--------------|-------------|--------------|-----------|-----------|-----------|
| MSTRG. 147201. 1  | SPINDOC      | XLOC_154410 | 702 coding   | noncoding | noncoding | noncoding |
| MSTRG. 147238. 1  | KCNK4-TEX40  | XLOC_154434 | 239 coding   | noncoding | noncoding | noncoding |
| MSTRG. 147274. 1  | SLC22A11     | XLOC_154452 | 289 coding   | noncoding | noncoding | noncoding |
| NM_015080. 3      | NRXN2        | XLOC_154454 | 6623 coding  | coding    | coding    | coding    |
| MSTRG. 147314. 1  |              | XLOC_154458 | 286 coding   | noncoding | noncoding | noncoding |
| NM_017525. 3      | CDC42BPG     | XLOC_154465 | 6161 coding  | coding    | coding    | coding    |
| XM_005273918. 2   | MAJIN        | XLOC_154476 | 1329 coding  | coding    | coding    | coding    |
| MSTRG. 147322. 1  |              | XLOC_154479 | 268 coding   | noncoding | noncoding | noncoding |
| MSTRG. 147348. 1  |              | XLOC_154494 | 246 coding   | noncoding | noncoding | noncoding |
| MSTRG. 147435. 11 | NEAT1        | XLOC_154510 | 19320 coding | noncoding | noncoding | coding    |
| MSTRG. 147435. 9  | NEAT1        | XLOC_154510 | 8777 coding  | noncoding | noncoding | noncoding |
| MSTRG. 147400. 1  |              | XLOC_154512 | 204 coding   | noncoding | noncoding | noncoding |
| MSTRG. 147479. 2  | EHBP1L1      | XLOC_154524 | 3927 coding  | coding    | coding    | coding    |
| MSTRG. 147500. 1  |              | XLOC_154536 | 269 coding   | noncoding | noncoding | noncoding |
| MSTRG. 147524. 1  |              | XLOC_154553 | 287 coding   | noncoding | noncoding | noncoding |
| MSTRG. 147458. 1  | LOC105369350 | XLOC_154561 | 283 coding   | noncoding | noncoding | noncoding |
| MSTRG. 147463. 1  |              | XLOC_154564 | 291 coding   | noncoding | noncoding | noncoding |
| MSTRG. 147577. 2  | PACS1        | XLOC_154573 | 2043 coding  | coding    | coding    | coding    |
| MSTRG. 147530. 1  | TMEM151A     | XLOC_154591 | 233 coding   | coding    | coding    | noncoding |
| MSTRG. 147563. 1  |              | XLOC_154601 | 240 coding   | noncoding | noncoding | noncoding |
| XR_949860. 3      | ZDHHC24      | XLOC_154611 | 1775 coding  | coding    | coding    | coding    |
| MSTRG. 147646. 1  | ACTN3        | XLOC_154615 | 452 coding   | noncoding | noncoding | noncoding |
| MSTRG. 147612. 1  |              | XLOC_154617 | 287 coding   | noncoding | noncoding | noncoding |
| XM_006718669. 3   | SPTBN2       | XLOC_154623 | 12969 coding | coding    | noncoding | coding    |
| MSTRG. 147690. 1  | PC           | XLOC_154636 | 245 coding   | noncoding | noncoding | noncoding |
| MSTRG. 147704. 1  | SYT12        | XLOC_154643 | 280 coding   | noncoding | noncoding | noncoding |
| MSTRG. 147736. 1  | CARNS1       | XLOC_154666 | 249 coding   | noncoding | noncoding | noncoding |
| MSTRG. 147737. 1  | CARNS1       | XLOC_154667 | 2109 coding  | coding    | coding    | coding    |
| XR_002957210. 1   | PITPNM1      | XLOC_154676 | 4370 coding  | coding    | coding    | coding    |
| MSTRG. 147768. 1  |              | XLOC_154683 | 282 coding   | noncoding | noncoding | noncoding |
| MSTRG. 147806. 1  |              | XLOC_154694 | 265 coding   | noncoding | noncoding | noncoding |
| XR_002957254. 1   | LOC112268076 | XLOC_154705 | 1958 coding  | noncoding | coding    | coding    |
| MSTRG. 147816. 1  | LOC112268076 | XLOC_154706 | 267 coding   | coding    | noncoding | noncoding |
| MSTRG. 147855. 26 | KMT5B        | XLOC_154716 | 651 coding   | noncoding | noncoding | noncoding |
| MSTRG. 147828. 1  |              | XLOC_154720 | 248 coding   | noncoding | noncoding | noncoding |
| MSTRG. 147867. 1  |              | XLOC_154729 | 466 coding   | noncoding | noncoding | noncoding |
| NM_001876. 4      | CPT1A        | XLOC_154734 | 5238 coding  | coding    | coding    | coding    |
| MSTRG. 147889. 1  | CPT1A        | XLOC_154736 | 266 coding   | noncoding | noncoding | noncoding |
| MSTRG. 147890. 1  | CPT1A        | XLOC_154737 | 280 coding   | noncoding | noncoding | noncoding |
| MSTRG. 147881. 1  |              | XLOC_154738 | 431 coding   | noncoding | noncoding | noncoding |
| MSTRG. 147885. 1  |              | XLOC_154740 | 285 coding   | noncoding | noncoding | noncoding |
| MSTRG. 148015. 1  |              | XLOC_154775 | 269 coding   | noncoding | noncoding | noncoding |
| XM_017017390. 1   | SHANK2       | XLOC_154802 | 11610 coding | coding    | coding    | coding    |

|                 |               |             |             |           |           |           |
|-----------------|---------------|-------------|-------------|-----------|-----------|-----------|
| MSTRG.148060.1  | SHANK2        | XLOC_154811 | 268 coding  | noncoding | noncoding | noncoding |
| MSTRG.148078.1  | SHANK2        | XLOC_154819 | 222 coding  | noncoding | noncoding | noncoding |
| MSTRG.148002.1  |               | XLOC_154822 | 243 coding  | noncoding | noncoding | noncoding |
| NR_038862.1     | FLJ42102      | XLOC_154826 | 2162 coding | noncoding | noncoding | coding    |
| MSTRG.148085.1  |               | XLOC_154832 | 328 coding  | noncoding | noncoding | noncoding |
| MSTRG.148124.1  |               | XLOC_154855 | 246 coding  | noncoding | noncoding | noncoding |
| MSTRG.148128.1  | LOC100133315  | XLOC_154859 | 278 coding  | noncoding | noncoding | noncoding |
| MSTRG.148140.1  |               | XLOC_154884 | 251 coding  | noncoding | noncoding | noncoding |
| MSTRG.148143.1  |               | XLOC_154885 | 272 coding  | noncoding | noncoding | noncoding |
| MSTRG.148149.1  |               | XLOC_154893 | 288 coding  | noncoding | noncoding | noncoding |
| NM_014824.3     | FCHSD2        | XLOC_154917 | 4710 coding | coding    | coding    | coding    |
| MSTRG.148496.1  | ATG16L2       | XLOC_154918 | 5500 coding | noncoding | coding    | noncoding |
| MSTRG.148274.1  | FAM168A       | XLOC_154977 | 214 coding  | noncoding | noncoding | noncoding |
| MSTRG.148277.1  | FAM168A       | XLOC_154980 | 269 coding  | noncoding | noncoding | noncoding |
| MSTRG.148286.1  | FAM168A       | XLOC_154989 | 212 coding  | noncoding | noncoding | noncoding |
| NM_001243719.1  | RAB6A         | XLOC_155010 | 2863 coding | coding    | coding    | coding    |
| MSTRG.148232.1  | RAB6A         | XLOC_155012 | 217 coding  | noncoding | noncoding | noncoding |
| XM_024448674.1  | UCP2          | XLOC_155021 | 1830 coding | coding    | coding    | coding    |
| MSTRG.148329.17 | C2CD3         | XLOC_155024 | 744 coding  | noncoding | coding    | noncoding |
| MSTRG.148317.1  |               | XLOC_155032 | 272 coding  | noncoding | noncoding | noncoding |
| MSTRG.148306.1  |               | XLOC_155038 | 303 coding  | coding    | noncoding | noncoding |
| MSTRG.148439.44 | XRRA1         | XLOC_155056 | 4772 coding | noncoding | coding    | noncoding |
| XM_017017750.1  | ARRB1         | XLOC_155078 | 7478 coding | coding    | coding    | coding    |
| MSTRG.148396.1  | ARRB1         | XLOC_155084 | 492 coding  | noncoding | noncoding | noncoding |
| MSTRG.148412.1  | MOGAT2        | XLOC_155107 | 396 coding  | coding    | noncoding | noncoding |
| MSTRG.148436.1  | LOC105369395  | XLOC_155121 | 230 coding  | noncoding | noncoding | noncoding |
| MSTRG.148437.1  | LOC105369395  | XLOC_155122 | 258 coding  | noncoding | noncoding | noncoding |
| XM_011544935.3  | LRRC32        | XLOC_155136 | 4602 coding | coding    | coding    | coding    |
| MSTRG.148658.1  | GDPD4         | XLOC_155156 | 215 coding  | noncoding | noncoding | noncoding |
| XM_024448561.1  | PAK1          | XLOC_155157 | 3169 coding | coding    | coding    | coding    |
| MSTRG.148666.1  | AQP11         | XLOC_155165 | 287 coding  | noncoding | noncoding | noncoding |
| MSTRG.148896.1  | RSF1          | XLOC_155176 | 240 coding  | noncoding | noncoding | noncoding |
| MSTRG.148905.1  | RSF1          | XLOC_155185 | 203 coding  | noncoding | noncoding | noncoding |
| MSTRG.148915.1  | RSF1          | XLOC_155194 | 382 coding  | noncoding | noncoding | noncoding |
| MSTRG.148932.1  | INTS4         | XLOC_155208 | 278 coding  | noncoding | noncoding | noncoding |
| MSTRG.148699.1  | NDUFC2-KCTD14 | XLOC_155213 | 270 coding  | noncoding | noncoding | noncoding |
| MSTRG.148700.1  | NDUFC2-KCTD14 | XLOC_155214 | 262 coding  | noncoding | noncoding | noncoding |
| MSTRG.148692.1  | LOC105369401  | XLOC_155216 | 259 coding  | noncoding | noncoding | noncoding |
| MSTRG.149025.1  | ALG8          | XLOC_155220 | 298 coding  | noncoding | noncoding | noncoding |
| XM_006718753.2  | GAB2          | XLOC_155228 | 6154 coding | coding    | coding    | coding    |
| MSTRG.148712.1  |               | XLOC_155301 | 265 coding  | noncoding | noncoding | noncoding |
| MSTRG.148833.1  | TENM4         | XLOC_155317 | 259 coding  | noncoding | noncoding | noncoding |
| MSTRG.148722.1  |               | XLOC_155336 | 230 coding  | noncoding | noncoding | noncoding |

|                  |              |             |             |           |           |           |
|------------------|--------------|-------------|-------------|-----------|-----------|-----------|
| MSTRG. 148733. 1 |              | XLOC_155341 | 247 coding  | noncoding | noncoding | noncoding |
| MSTRG. 148749. 1 |              | XLOC_155344 | 207 coding  | noncoding | noncoding | noncoding |
| MSTRG. 148765. 1 | LOC107984424 | XLOC_155352 | 252 coding  | noncoding | noncoding | noncoding |
| MSTRG. 148768. 1 |              | XLOC_155354 | 263 coding  | noncoding | noncoding | noncoding |
| MSTRG. 148805. 1 |              | XLOC_155370 | 250 coding  | noncoding | noncoding | noncoding |
| MSTRG. 148877. 1 |              | XLOC_155378 | 428 coding  | coding    | noncoding | noncoding |
| MSTRG. 148888. 1 |              | XLOC_155389 | 277 coding  | noncoding | noncoding | noncoding |
| MSTRG. 148939. 1 |              | XLOC_155394 | 313 coding  | noncoding | noncoding | noncoding |
| MSTRG. 148967. 1 |              | XLOC_155396 | 277 coding  | noncoding | noncoding | noncoding |
| NM_199418. 3     | PRCP         | XLOC_155398 | 3721 coding | coding    | coding    | coding    |
| NM_001286060. 2  | RAB30        | XLOC_155410 | 9859 coding | coding    | coding    | coding    |
| MSTRG. 149004. 1 | RAB30        | XLOC_155411 | 602 coding  | noncoding | noncoding | noncoding |
| XM_017017290. 1  | DLG2         | XLOC_155449 | 6198 coding | coding    | coding    | coding    |
| MSTRG. 149198. 1 | DLG2         | XLOC_155457 | 281 coding  | coding    | noncoding | noncoding |
| MSTRG. 149253. 1 | DLG2         | XLOC_155481 | 246 coding  | noncoding | noncoding | noncoding |
| MSTRG. 149271. 1 | DLG2         | XLOC_155482 | 329 coding  | noncoding | noncoding | noncoding |
| MSTRG. 149299. 1 | DLG2         | XLOC_155490 | 283 coding  | coding    | noncoding | noncoding |
| MSTRG. 149340. 1 | DLG2         | XLOC_155500 | 299 coding  | coding    | noncoding | noncoding |
| XM_017018087. 1  | CREBZF       | XLOC_155507 | 4209 coding | noncoding | coding    | coding    |
| MSTRG. 149172. 1 | SYTL2        | XLOC_155513 | 284 coding  | noncoding | noncoding | noncoding |
| NM_001206946. 2  | PICALM       | XLOC_155530 | 4113 coding | coding    | coding    | coding    |
| XM_005274325. 3  | PICALM       | XLOC_155530 | 3773 coding | coding    | coding    | coding    |
| MSTRG. 149358. 3 | EED          | XLOC_155564 | 1271 coding | coding    | noncoding | noncoding |
| MSTRG. 149438. 1 | ME3          | XLOC_155584 | 263 coding  | noncoding | noncoding | noncoding |
| MSTRG. 149450. 1 | ME3          | XLOC_155587 | 238 coding  | noncoding | noncoding | noncoding |
| MSTRG. 149464. 1 | ME3-DT       | XLOC_155596 | 279 coding  | noncoding | noncoding | noncoding |
| MSTRG. 149418. 1 |              | XLOC_155600 | 360 coding  | noncoding | noncoding | noncoding |
| MSTRG. 149471. 1 | FZD4-DT      | XLOC_155611 | 315 coding  | coding    | noncoding | noncoding |
| MSTRG. 149553. 1 | LOC105369422 | XLOC_155614 | 295 coding  | noncoding | noncoding | noncoding |
| MSTRG. 149508. 1 | LOC107984361 | XLOC_155624 | 248 coding  | noncoding | noncoding | noncoding |
| MSTRG. 149512. 1 | LOC107984361 | XLOC_155625 | 283 coding  | noncoding | noncoding | noncoding |
| MSTRG. 149519. 1 | LOC107984361 | XLOC_155628 | 260 coding  | coding    | noncoding | noncoding |
| MSTRG. 149521. 1 | LOC107984361 | XLOC_155629 | 235 coding  | noncoding | noncoding | noncoding |
| MSTRG. 149536. 1 | RAB38        | XLOC_155635 | 357 coding  | noncoding | noncoding | noncoding |
| MSTRG. 149581. 1 |              | XLOC_155679 | 269 coding  | noncoding | noncoding | noncoding |
| MSTRG. 149597. 1 | GRM5         | XLOC_155689 | 225 coding  | noncoding | noncoding | noncoding |
| MSTRG. 149602. 1 | LOC107984363 | XLOC_155691 | 256 coding  | noncoding | noncoding | noncoding |
| MSTRG. 149583. 1 |              | XLOC_155696 | 345 coding  | noncoding | noncoding | noncoding |
| MSTRG. 149708. 1 |              | XLOC_155712 | 228 coding  | noncoding | noncoding | noncoding |
| MSTRG. 149711. 1 |              | XLOC_155713 | 227 coding  | noncoding | noncoding | noncoding |
| XM_011542816. 3  | TRIM49D1     | XLOC_155717 | 1590 coding | coding    | coding    | coding    |
| NR_146921. 1     | TRIM51EP     | XLOC_155718 | 1694 coding | coding    | coding    | coding    |
| MSTRG. 149731. 1 |              | XLOC_155777 | 287 coding  | coding    | noncoding | noncoding |

|                  |              |             |             |           |           |           |
|------------------|--------------|-------------|-------------|-----------|-----------|-----------|
| MSTRG. 149738. 1 | LOC107984371 | XLOC_155780 | 226 coding  | coding    | noncoding | noncoding |
| MSTRG. 149740. 1 |              | XLOC_155783 | 320 coding  | noncoding | noncoding | noncoding |
| MSTRG. 149743. 1 |              | XLOC_155785 | 306 coding  | noncoding | noncoding | noncoding |
| MSTRG. 149846. 1 | FAT3         | XLOC_155800 | 242 coding  | noncoding | noncoding | noncoding |
| MSTRG. 149900. 1 | SLC36A4      | XLOC_155824 | 249 coding  | noncoding | noncoding | noncoding |
| MSTRG. 149902. 1 | SLC36A4      | XLOC_155825 | 263 coding  | noncoding | noncoding | noncoding |
| MSTRG. 149915. 1 | DEUP1        | XLOC_155830 | 315 coding  | noncoding | noncoding | noncoding |
| MSTRG. 149862. 1 |              | XLOC_155834 | 293 coding  | noncoding | noncoding | noncoding |
| MSTRG. 149926. 1 |              | XLOC_155854 | 269 coding  | noncoding | noncoding | noncoding |
| MSTRG. 149953. 1 | LOC105369435 | XLOC_155863 | 573 coding  | noncoding | noncoding | noncoding |
| NM_016540. 4     | GPR83        | XLOC_155867 | 4277 coding | coding    | coding    | coding    |
| MSTRG. 150154. 1 |              | XLOC_155936 | 303 coding  | coding    | noncoding | noncoding |
| MSTRG. 150673. 1 | MAML2        | XLOC_155956 | 308 coding  | noncoding | noncoding | noncoding |
| MSTRG. 150689. 1 | MAML2        | XLOC_155969 | 440 coding  | noncoding | noncoding | noncoding |
| MSTRG. 150694. 1 | MAML2        | XLOC_155974 | 308 coding  | noncoding | noncoding | noncoding |
| MSTRG. 150181. 1 |              | XLOC_156060 | 235 coding  | noncoding | noncoding | noncoding |
| MSTRG. 150208. 1 |              | XLOC_156065 | 369 coding  | noncoding | noncoding | noncoding |
| MSTRG. 150232. 1 |              | XLOC_156069 | 258 coding  | noncoding | noncoding | noncoding |
| MSTRG. 150258. 1 |              | XLOC_156088 | 216 coding  | noncoding | noncoding | noncoding |
| MSTRG. 150322. 1 | CNTN5        | XLOC_156107 | 228 coding  | noncoding | noncoding | noncoding |
| MSTRG. 150342. 1 | CNTN5        | XLOC_156117 | 430 coding  | noncoding | noncoding | noncoding |
| MSTRG. 150349. 1 | CNTN5        | XLOC_156121 | 279 coding  | noncoding | noncoding | noncoding |
| MSTRG. 150353. 1 | CNTN5        | XLOC_156123 | 329 coding  | coding    | noncoding | noncoding |
| MSTRG. 150355. 1 | CNTN5        | XLOC_156124 | 459 coding  | coding    | noncoding | noncoding |
| MSTRG. 150362. 1 | CNTN5        | XLOC_156126 | 235 coding  | noncoding | noncoding | noncoding |
| MSTRG. 150363. 1 | CNTN5        | XLOC_156127 | 283 coding  | noncoding | noncoding | noncoding |
| MSTRG. 150375. 1 | CNTN5        | XLOC_156131 | 458 coding  | noncoding | noncoding | noncoding |
| MSTRG. 150376. 1 | CNTN5        | XLOC_156132 | 206 coding  | noncoding | noncoding | noncoding |
| MSTRG. 150383. 1 | CNTN5        | XLOC_156135 | 273 coding  | noncoding | noncoding | noncoding |
| MSTRG. 150294. 1 |              | XLOC_156139 | 269 coding  | noncoding | noncoding | noncoding |
| MSTRG. 150305. 1 |              | XLOC_156144 | 532 coding  | noncoding | noncoding | noncoding |
| MSTRG. 150400. 1 | ARHGAP42     | XLOC_156150 | 280 coding  | noncoding | noncoding | noncoding |
| MSTRG. 150408. 1 | ARHGAP42     | XLOC_156155 | 262 coding  | noncoding | noncoding | noncoding |
| MSTRG. 150315. 1 |              | XLOC_156175 | 247 coding  | noncoding | noncoding | noncoding |
| MSTRG. 150390. 1 |              | XLOC_156177 | 318 coding  | noncoding | noncoding | noncoding |
| MSTRG. 150455. 1 |              | XLOC_156190 | 230 coding  | coding    | noncoding | noncoding |
| MSTRG. 150464. 1 |              | XLOC_156197 | 356 coding  | noncoding | noncoding | noncoding |
| MSTRG. 150466. 1 |              | XLOC_156198 | 245 coding  | noncoding | noncoding | noncoding |
| MSTRG. 150492. 1 |              | XLOC_156209 | 306 coding  | noncoding | noncoding | noncoding |
| MSTRG. 150570. 2 | DYNC2H1      | XLOC_156242 | 277 coding  | coding    | noncoding | noncoding |
| MSTRG. 150590. 1 |              | XLOC_156276 | 249 coding  | noncoding | noncoding | noncoding |
| NR_034070. 2     | CASP12       | XLOC_156296 | 1783 coding | coding    | coding    | coding    |
| MSTRG. 150642. 1 |              | XLOC_156298 | 270 coding  | noncoding | noncoding | noncoding |

|                 |                |             |              |           |           |           |
|-----------------|----------------|-------------|--------------|-----------|-----------|-----------|
| NM_001136109.2  | CASP5          | XLOC_156303 | 1280 coding  | coding    | coding    | coding    |
| MSTRG.150923.1  | CASP5          | XLOC_156307 | 639 coding   | noncoding | noncoding | noncoding |
| MSTRG.150808.1  | LOC105369468   | XLOC_156325 | 252 coding   | noncoding | noncoding | noncoding |
| MSTRG.150816.1  | GRIA4          | XLOC_156327 | 302 coding   | noncoding | noncoding | noncoding |
| MSTRG.150834.1  | MSANTD4        | XLOC_156335 | 647 coding   | noncoding | noncoding | noncoding |
| MSTRG.150828.1  |                | XLOC_156337 | 693 coding   | noncoding | noncoding | noncoding |
| MSTRG.150837.1  | LINC02719      | XLOC_156343 | 322 coding   | noncoding | noncoding | noncoding |
| MSTRG.150860.1  |                | XLOC_156358 | 253 coding   | noncoding | noncoding | noncoding |
| NM_001256424.2  | GUCY1A2        | XLOC_156362 | 16243 coding | coding    | coding    | coding    |
| MSTRG.150894.1  | LOC112268081   | XLOC_156363 | 254 coding   | noncoding | noncoding | noncoding |
| MSTRG.150898.1  | GUCY1A2        | XLOC_156365 | 236 coding   | noncoding | noncoding | noncoding |
| XM_024448768.1  | ALKBH8         | XLOC_156400 | 3793 coding  | coding    | coding    | coding    |
| MSTRG.150946.1  |                | XLOC_156409 | 295 coding   | noncoding | noncoding | noncoding |
| MSTRG.150976.1  |                | XLOC_156414 | 298 coding   | noncoding | noncoding | noncoding |
| MSTRG.151264.1  | C11orf65       | XLOC_156422 | 258 coding   | noncoding | noncoding | noncoding |
| MSTRG.151035.1  | EXPH5          | XLOC_156427 | 513 coding   | noncoding | noncoding | noncoding |
| MSTRG.151071.1  |                | XLOC_156439 | 287 coding   | noncoding | noncoding | noncoding |
| MSTRG.151055.1  | LINC02732      | XLOC_156478 | 283 coding   | noncoding | noncoding | noncoding |
| MSTRG.151057.1  | LINC02732      | XLOC_156479 | 284 coding   | noncoding | noncoding | noncoding |
| XM_024448600.1  | PPP2R1B        | XLOC_156531 | 2461 coding  | coding    | coding    | coding    |
| NM_002716.5     | PPP2R1B        | XLOC_156531 | 5553 coding  | coding    | coding    | coding    |
| MSTRG.151267.1  | FDXACB1        | XLOC_156537 | 3398 coding  | coding    | coding    | coding    |
| MSTRG.151273.1  | HSPB2-C11orf52 | XLOC_156540 | 359 coding   | noncoding | noncoding | noncoding |
| MSTRG.151306.1  | DIXDC1         | XLOC_156542 | 260 coding   | noncoding | noncoding | noncoding |
| NR_160400.1     | TIMM8B         | XLOC_156548 | 1095 coding  | coding    | noncoding | noncoding |
| MSTRG.151370.1  |                | XLOC_156650 | 313 coding   | noncoding | noncoding | noncoding |
| MSTRG.151389.1  |                | XLOC_156657 | 258 coding   | noncoding | noncoding | noncoding |
| MSTRG.151501.1  | DRD2           | XLOC_156674 | 271 coding   | noncoding | noncoding | noncoding |
| MSTRG.151511.1  | LOC107984390   | XLOC_156680 | 255 coding   | noncoding | noncoding | noncoding |
| MSTRG.151521.1  | ZW10           | XLOC_156683 | 253 coding   | noncoding | noncoding | noncoding |
| MSTRG.151616.1  | NXPE2          | XLOC_156742 | 255 coding   | noncoding | noncoding | noncoding |
| NR_034148.1     | LINC00900      | XLOC_156770 | 2245 coding  | noncoding | noncoding | noncoding |
| MSTRG.151648.1  | LINC02698      | XLOC_156772 | 237 coding   | noncoding | noncoding | noncoding |
| MSTRG.151670.1  |                | XLOC_156792 | 269 coding   | noncoding | noncoding | noncoding |
| MSTRG.151683.1  |                | XLOC_156794 | 302 coding   | noncoding | noncoding | noncoding |
| MSTRG.151858.1  | SIK3           | XLOC_156821 | 260 coding   | noncoding | noncoding | noncoding |
| MSTRG.151861.1  | SIK3           | XLOC_156824 | 278 coding   | noncoding | noncoding | noncoding |
| MSTRG.151751.1  |                | XLOC_156855 | 922 coding   | coding    | coding    | noncoding |
| MSTRG.151944.1  | TMPRSS4        | XLOC_156893 | 255 coding   | coding    | noncoding | noncoding |
| NM_004588.5     | SCN2B          | XLOC_156895 | 4937 coding  | coding    | coding    | coding    |
| MSTRG.151899.1  |                | XLOC_156906 | 224 coding   | noncoding | noncoding | noncoding |
| MSTRG.151967.2  | LOC100131626   | XLOC_156912 | 4321 coding  | coding    | coding    | noncoding |
| MSTRG.151967.10 | LOC100131626   | XLOC_156912 | 6097 coding  | coding    | noncoding | noncoding |

|                |              |             |             |           |           |           |
|----------------|--------------|-------------|-------------|-----------|-----------|-----------|
| MSTRG.152028.1 | TMEM25       | XLOC_156915 | 402 coding  | coding    | noncoding | noncoding |
| NM_020153.3    | IFT46        | XLOC_156917 | 1875 coding | coding    | coding    | coding    |
| MSTRG.151991.1 |              | XLOC_156930 | 297 coding  | noncoding | noncoding | noncoding |
| XR_001748410.1 | CCDC84-DT    | XLOC_156937 | 1241 coding | noncoding | noncoding | noncoding |
| MSTRG.152055.1 |              | XLOC_156961 | 301 coding  | noncoding | noncoding | noncoding |
| MSTRG.152118.1 | NECTIN1      | XLOC_156979 | 321 coding  | noncoding | noncoding | noncoding |
| MSTRG.152112.1 |              | XLOC_156984 | 555 coding  | noncoding | noncoding | noncoding |
| MSTRG.152162.4 | ARHGEF12     | XLOC_157004 | 6285 coding | coding    | coding    | noncoding |
| MSTRG.152162.7 | ARHGEF12     | XLOC_157004 | 6333 coding | coding    | coding    | noncoding |
| MSTRG.152208.9 | TBCEL        | XLOC_157022 | 2357 coding | coding    | noncoding | noncoding |
| MSTRG.152418.1 | LOC105369536 | XLOC_157048 | 401 coding  | noncoding | noncoding | noncoding |
| MSTRG.152334.1 | MIR100HG     | XLOC_157119 | 307 coding  | noncoding | noncoding | noncoding |
| MSTRG.152298.1 |              | XLOC_157120 | 343 coding  | noncoding | noncoding | noncoding |
| MSTRG.152376.1 |              | XLOC_157123 | 247 coding  | noncoding | noncoding | noncoding |
| MSTRG.152404.1 | CLMP         | XLOC_157157 | 312 coding  | noncoding | noncoding | noncoding |
| MSTRG.152405.1 | CLMP         | XLOC_157158 | 240 coding  | noncoding | noncoding | noncoding |
| MSTRG.152374.1 |              | XLOC_157163 | 299 coding  | noncoding | noncoding | noncoding |
| MSTRG.152513.1 | GRAMD1B      | XLOC_157170 | 253 coding  | noncoding | noncoding | noncoding |
| MSTRG.152448.1 |              | XLOC_157176 | 249 coding  | noncoding | noncoding | noncoding |
| XM_017017716.1 | OR8B3        | XLOC_157204 | 2308 coding | coding    | coding    | coding    |
| MSTRG.152503.1 |              | XLOC_157212 | 500 coding  | noncoding | noncoding | noncoding |
| MSTRG.152504.1 |              | XLOC_157213 | 251 coding  | noncoding | noncoding | noncoding |
| NM_212555.3    | PATE2        | XLOC_157248 | 1666 coding | noncoding | noncoding | noncoding |
| MSTRG.152645.1 | CDON         | XLOC_157255 | 231 coding  | noncoding | noncoding | noncoding |
| NM_001144827.1 | RPUSD4       | XLOC_157262 | 2419 coding | coding    | coding    | coding    |
| NM_032795.3    | RPUSD4       | XLOC_157262 | 2468 coding | coding    | coding    | coding    |
| MSTRG.152796.5 | ST3GAL4      | XLOC_157274 | 741 coding  | coding    | coding    | noncoding |
| MSTRG.152698.1 | KIRREL3      | XLOC_157284 | 273 coding  | noncoding | noncoding | noncoding |
| MSTRG.152680.1 |              | XLOC_157311 | 262 coding  | noncoding | noncoding | noncoding |
| MSTRG.152683.1 |              | XLOC_157313 | 302 coding  | noncoding | noncoding | noncoding |
| XM_017018116.1 | TP53AIP1     | XLOC_157378 | 5327 coding | coding    | coding    | coding    |
| MSTRG.152989.1 | ARHGAP32     | XLOC_157385 | 344 coding  | noncoding | noncoding | noncoding |
| MSTRG.152997.1 | ARHGAP32     | XLOC_157387 | 253 coding  | coding    | noncoding | noncoding |
| MSTRG.152998.1 | ARHGAP32     | XLOC_157388 | 215 coding  | noncoding | noncoding | noncoding |
| MSTRG.153000.1 | ARHGAP32     | XLOC_157389 | 236 coding  | coding    | noncoding | noncoding |
| MSTRG.153028.1 | ARHGAP32     | XLOC_157394 | 277 coding  | noncoding | noncoding | noncoding |
| MSTRG.152885.1 |              | XLOC_157404 | 276 coding  | coding    | noncoding | noncoding |
| MSTRG.152911.1 |              | XLOC_157410 | 296 coding  | noncoding | noncoding | noncoding |
| XM_017018023.1 | PRDM10       | XLOC_157422 | 8077 coding | coding    | coding    | coding    |
| MSTRG.153075.1 | ST14         | XLOC_157441 | 251 coding  | noncoding | noncoding | noncoding |
| XM_006718826.4 | ZBTB44       | XLOC_157449 | 9163 coding | coding    | coding    | coding    |
| XM_006718825.4 | ZBTB44       | XLOC_157449 | 9380 coding | coding    | coding    | coding    |
| MSTRG.153115.1 | ZBTB44-DT    | XLOC_157452 | 275 coding  | noncoding | noncoding | noncoding |

|                   |              |             |              |           |           |           |
|-------------------|--------------|-------------|--------------|-----------|-----------|-----------|
| MSTRG. 153095. 1  |              | XLOC_157457 | 254 coding   | coding    | noncoding | noncoding |
| MSTRG. 153222. 1  | OPCML        | XLOC_157516 | 227 coding   | noncoding | noncoding | noncoding |
| MSTRG. 153223. 1  | OPCML        | XLOC_157517 | 213 coding   | noncoding | noncoding | noncoding |
| MSTRG. 153301. 1  |              | XLOC_157565 | 243 coding   | noncoding | noncoding | noncoding |
| MSTRG. 153316. 1  |              | XLOC_157578 | 238 coding   | noncoding | noncoding | noncoding |
| MSTRG. 153318. 1  |              | XLOC_157579 | 248 coding   | coding    | noncoding | noncoding |
| MSTRG. 153324. 1  |              | XLOC_157584 | 319 coding   | noncoding | noncoding | noncoding |
| MSTRG. 153326. 1  |              | XLOC_157592 | 298 coding   | noncoding | noncoding | noncoding |
| MSTRG. 153327. 1  |              | XLOC_157593 | 263 coding   | noncoding | noncoding | noncoding |
| MSTRG. 153366. 1  |              | XLOC_157606 | 287 coding   | noncoding | noncoding | noncoding |
| MSTRG. 153382. 1  | B4GALNT3     | XLOC_157609 | 309 coding   | noncoding | noncoding | noncoding |
| XM_017019835. 1   | WNK1         | XLOC_157619 | 10234 coding | coding    | coding    | coding    |
| XM_017019836. 1   | WNK1         | XLOC_157619 | 10231 coding | coding    | coding    | coding    |
| XM_017019834. 1   | WNK1         | XLOC_157619 | 10315 coding | coding    | coding    | coding    |
| MSTRG. 153673. 1  | RAD52        | XLOC_157628 | 251 coding   | noncoding | noncoding | noncoding |
| MSTRG. 153695. 1  | ERC1         | XLOC_157647 | 290 coding   | noncoding | noncoding | noncoding |
| MSTRG. 153702. 1  | ERC1         | XLOC_157654 | 296 coding   | noncoding | noncoding | noncoding |
| MSTRG. 153447. 1  | CACNA2D4     | XLOC_157668 | 364 coding   | coding    | noncoding | noncoding |
| XR_002957360. 1   | ITFG2        | XLOC_157697 | 3579 coding  | coding    | coding    | coding    |
| MSTRG. 153524. 1  | ITFG2        | XLOC_157698 | 276 coding   | noncoding | noncoding | noncoding |
| MSTRG. 153535. 1  | RHNO1        | XLOC_157702 | 431 coding   | noncoding | noncoding | noncoding |
| MSTRG. 153549. 1  | LOC105369608 | XLOC_157733 | 300 coding   | noncoding | noncoding | noncoding |
| MSTRG. 153559. 1  |              | XLOC_157738 | 240 coding   | noncoding | noncoding | noncoding |
| MSTRG. 153570. 1  |              | XLOC_157741 | 209 coding   | noncoding | noncoding | noncoding |
| NM_005002. 5      | NDUFA9       | XLOC_157760 | 8356 coding  | coding    | coding    | coding    |
| NM_000217. 3      | KCNA1        | XLOC_157774 | 7985 coding  | coding    | coding    | coding    |
| MSTRG. 153654. 1  | LOC105369617 | XLOC_157785 | 295 coding   | noncoding | noncoding | noncoding |
| MSTRG. 153792. 1  | ANO2         | XLOC_157798 | 250 coding   | noncoding | noncoding | noncoding |
| MSTRG. 153800. 1  | ANO2         | XLOC_157803 | 365 coding   | noncoding | noncoding | noncoding |
| MSTRG. 153828. 13 | PLEKHG6      | XLOC_157825 | 3149 coding  | coding    | coding    | coding    |
| MSTRG. 153849. 17 | TAPBPL       | XLOC_157833 | 3396 coding  | coding    | coding    | coding    |
| MSTRG. 153845. 1  |              | XLOC_157834 | 238 coding   | noncoding | noncoding | noncoding |
| MSTRG. 153847. 1  |              | XLOC_157835 | 283 coding   | noncoding | noncoding | noncoding |
| MSTRG. 153875. 5  | ACRBP        | XLOC_157847 | 825 coding   | noncoding | noncoding | noncoding |
| MSTRG. 153880. 1  |              | XLOC_157850 | 350 coding   | noncoding | noncoding | noncoding |
| MSTRG. 153907. 1  | P3H3         | XLOC_157862 | 306 coding   | noncoding | noncoding | noncoding |
| NM_001940. 4      | ATN1         | XLOC_157873 | 4702 coding  | coding    | coding    | coding    |
| MSTRG. 153993. 1  |              | XLOC_157901 | 337 coding   | coding    | noncoding | noncoding |
| MSTRG. 154006. 1  |              | XLOC_157910 | 240 coding   | noncoding | noncoding | noncoding |
| MSTRG. 154024. 2  | SLC2A3       | XLOC_157914 | 3454 coding  | coding    | coding    | coding    |
| MSTRG. 154033. 1  |              | XLOC_157915 | 268 coding   | noncoding | noncoding | noncoding |
| MSTRG. 154036. 1  |              | XLOC_157917 | 210 coding   | noncoding | noncoding | noncoding |
| MSTRG. 154085. 1  | LOC112268090 | XLOC_157938 | 226 coding   | noncoding | noncoding | noncoding |

|                |              |             |             |           |           |           |
|----------------|--------------|-------------|-------------|-----------|-----------|-----------|
| MSTRG.154154.1 |              | XLOC_157987 | 246 coding  | noncoding | noncoding | noncoding |
| MSTRG.154163.1 |              | XLOC_157994 | 233 coding  | noncoding | noncoding | noncoding |
| MSTRG.154269.1 | DDX12P       | XLOC_158029 | 237 coding  | noncoding | noncoding | noncoding |
| NR_120305.1    | KLRF1        | XLOC_158082 | 949 coding  | coding    | noncoding | noncoding |
| NR_147038.1    | KLRD1        | XLOC_158133 | 3262 coding | coding    | noncoding | noncoding |
| XM_006719067.4 | KLRD1        | XLOC_158133 | 1103 coding | coding    | noncoding | coding    |
| MSTRG.154436.1 | LINC02617    | XLOC_158145 | 358 coding  | noncoding | noncoding | noncoding |
| MSTRG.154377.1 |              | XLOC_158147 | 222 coding  | noncoding | noncoding | noncoding |
| MSTRG.154448.1 | LOC105369657 | XLOC_158160 | 286 coding  | noncoding | noncoding | noncoding |
| MSTRG.154515.1 |              | XLOC_158233 | 248 coding  | noncoding | noncoding | noncoding |
| MSTRG.154520.1 |              | XLOC_158235 | 226 coding  | noncoding | noncoding | noncoding |
| MSTRG.154536.1 |              | XLOC_158296 | 258 coding  | noncoding | noncoding | noncoding |
| MSTRG.154542.1 |              | XLOC_158300 | 253 coding  | noncoding | noncoding | noncoding |
| MSTRG.154557.3 | LOC107984485 | XLOC_158307 | 5944 coding | coding    | coding    | noncoding |
| MSTRG.154700.1 |              | XLOC_158341 | 270 coding  | noncoding | noncoding | noncoding |
| MSTRG.154698.1 |              | XLOC_158343 | 228 coding  | noncoding | noncoding | noncoding |
| MSTRG.154709.1 | GPRC5A       | XLOC_158347 | 304 coding  | noncoding | noncoding | noncoding |
| MSTRG.154742.1 |              | XLOC_158363 | 317 coding  | noncoding | coding    | noncoding |
| MSTRG.154792.1 |              | XLOC_158372 | 244 coding  | noncoding | noncoding | noncoding |
| MSTRG.154815.1 | GRIN2B       | XLOC_158377 | 387 coding  | noncoding | noncoding | noncoding |
| MSTRG.154831.1 |              | XLOC_158392 | 290 coding  | noncoding | noncoding | noncoding |
| MSTRG.154832.1 |              | XLOC_158393 | 306 coding  | noncoding | noncoding | noncoding |
| MSTRG.154839.1 |              | XLOC_158394 | 299 coding  | noncoding | noncoding | noncoding |
| MSTRG.154840.1 |              | XLOC_158395 | 308 coding  | noncoding | noncoding | noncoding |
| MSTRG.154842.1 |              | XLOC_158396 | 228 coding  | noncoding | noncoding | noncoding |
| MSTRG.154846.1 |              | XLOC_158443 | 289 coding  | noncoding | noncoding | noncoding |
| MSTRG.154900.1 | PTPRO        | XLOC_158471 | 295 coding  | noncoding | noncoding | noncoding |
| MSTRG.154903.1 | PTPRO        | XLOC_158473 | 379 coding  | noncoding | noncoding | noncoding |
| MSTRG.154956.1 | LOC102724146 | XLOC_158496 | 307 coding  | noncoding | noncoding | noncoding |
| NR_036619.1    | SKP1P2       | XLOC_158533 | 1882 coding | coding    | coding    | coding    |
| MSTRG.155089.1 |              | XLOC_158534 | 326 coding  | coding    | noncoding | noncoding |
| MSTRG.155117.1 |              | XLOC_158540 | 317 coding  | noncoding | noncoding | noncoding |
| MSTRG.155120.1 |              | XLOC_158544 | 310 coding  | noncoding | noncoding | noncoding |
| MSTRG.155155.1 | PIK3C2G      | XLOC_158555 | 276 coding  | noncoding | noncoding | noncoding |
| MSTRG.155138.1 |              | XLOC_158573 | 251 coding  | noncoding | noncoding | noncoding |
| MSTRG.155183.1 |              | XLOC_158576 | 270 coding  | noncoding | noncoding | noncoding |
| MSTRG.155196.1 | PLEKHA5      | XLOC_158586 | 364 coding  | noncoding | noncoding | noncoding |
| MSTRG.155305.1 |              | XLOC_158597 | 299 coding  | noncoding | noncoding | noncoding |
| MSTRG.155244.1 |              | XLOC_158619 | 309 coding  | noncoding | noncoding | noncoding |
| MSTRG.155280.1 | SLCO1A2      | XLOC_158639 | 249 coding  | noncoding | noncoding | noncoding |
| NM_001350913.2 | PYROXD1      | XLOC_158643 | 4001 coding | coding    | coding    | coding    |
| NM_001350912.1 | PYROXD1      | XLOC_158643 | 4541 coding | coding    | coding    | coding    |
| NM_030572.4    | SPX          | XLOC_158645 | 2280 coding | coding    | coding    | noncoding |

|                   |              |             |              |           |           |           |
|-------------------|--------------|-------------|--------------|-----------|-----------|-----------|
| MSTRG. 155380. 1  | ABCC9        | XLOC_158656 | 253 coding   | noncoding | noncoding | noncoding |
| MSTRG. 155360. 1  |              | XLOC_158658 | 237 coding   | noncoding | noncoding | noncoding |
| MSTRG. 155409. 1  | ST8SIA1      | XLOC_158673 | 304 coding   | noncoding | noncoding | noncoding |
| MSTRG. 155480. 1  | LOC105369691 | XLOC_158701 | 322 coding   | noncoding | noncoding | noncoding |
| XM_005253420. 4   | ETNK1        | XLOC_158702 | 1158 coding  | coding    | coding    | coding    |
| MSTRG. 155490. 1  | ETNK1        | XLOC_158708 | 707 coding   | noncoding | noncoding | noncoding |
| MSTRG. 155448. 1  |              | XLOC_158720 | 260 coding   | noncoding | noncoding | noncoding |
| MSTRG. 155453. 1  |              | XLOC_158724 | 275 coding   | noncoding | noncoding | noncoding |
| MSTRG. 155458. 1  |              | XLOC_158727 | 485 coding   | noncoding | noncoding | noncoding |
| MSTRG. 155474. 1  |              | XLOC_158736 | 312 coding   | noncoding | noncoding | noncoding |
| MSTRG. 155610. 1  | SOX5         | XLOC_158788 | 322 coding   | noncoding | noncoding | noncoding |
| MSTRG. 155533. 1  | LOC105369698 | XLOC_158816 | 239 coding   | noncoding | noncoding | noncoding |
| MSTRG. 155538. 1  | LOC107984475 | XLOC_158825 | 290 coding   | noncoding | noncoding | noncoding |
| NM_001204126. 2   | LRMP         | XLOC_158828 | 2329 coding  | coding    | coding    | coding    |
| MSTRG. 155711. 1  | CASC1        | XLOC_158844 | 264 coding   | noncoding | noncoding | noncoding |
| MSTRG. 155647. 1  |              | XLOC_158847 | 288 coding   | noncoding | noncoding | noncoding |
| MSTRG. 155657. 1  |              | XLOC_158855 | 238 coding   | noncoding | coding    | noncoding |
| MSTRG. 155665. 1  |              | XLOC_158863 | 270 coding   | noncoding | noncoding | noncoding |
| XM_011520855. 2   | SSPN         | XLOC_158872 | 4199 coding  | coding    | coding    | noncoding |
| MSTRG. 155896. 1  |              | XLOC_158883 | 292 coding   | noncoding | noncoding | noncoding |
| MSTRG. 155905. 1  | ITPR2        | XLOC_158887 | 14538 coding | coding    | coding    | noncoding |
| MSTRG. 155905. 4  | ITPR2        | XLOC_158887 | 11195 coding | coding    | coding    | noncoding |
| MSTRG. 155738. 1  |              | XLOC_158906 | 259 coding   | noncoding | noncoding | noncoding |
| MSTRG. 155739. 1  |              | XLOC_158907 | 256 coding   | noncoding | noncoding | noncoding |
| MSTRG. 155740. 1  |              | XLOC_158908 | 316 coding   | noncoding | noncoding | noncoding |
| MSTRG. 155783. 1  | STK38L       | XLOC_158928 | 215 coding   | noncoding | noncoding | noncoding |
| MSTRG. 155751. 1  | ARNTL2       | XLOC_158934 | 272 coding   | coding    | noncoding | noncoding |
| MSTRG. 155752. 1  | ARNTL2       | XLOC_158935 | 720 coding   | noncoding | noncoding | noncoding |
| XM_017019780. 1   | MRPS35       | XLOC_158945 | 685 coding   | noncoding | coding    | coding    |
| XM_024449036. 1   | CCDC91       | XLOC_158961 | 2711 coding  | noncoding | coding    | coding    |
| XM_024449034. 1   | CCDC91       | XLOC_158961 | 2778 coding  | noncoding | coding    | coding    |
| MSTRG. 156200. 13 | ERGIC2       | XLOC_159015 | 2443 coding  | coding    | noncoding | noncoding |
| MSTRG. 156231. 1  | FAR2         | XLOC_159043 | 317 coding   | noncoding | noncoding | noncoding |
| MSTRG. 156065. 1  | TMTC1        | XLOC_159075 | 237 coding   | noncoding | noncoding | noncoding |
| MSTRG. 156039. 1  | LOC105369715 | XLOC_159114 | 282 coding   | noncoding | noncoding | noncoding |
| MSTRG. 156024. 1  |              | XLOC_159115 | 289 coding   | noncoding | noncoding | noncoding |
| MSTRG. 156051. 1  |              | XLOC_159127 | 227 coding   | noncoding | noncoding | noncoding |
| MSTRG. 156283. 1  | DDX11-AS1    | XLOC_159150 | 262 coding   | noncoding | noncoding | noncoding |
| MSTRG. 156294. 1  |              | XLOC_159155 | 234 coding   | noncoding | noncoding | noncoding |
| MSTRG. 156311. 1  | DENND5B-AS1  | XLOC_159164 | 285 coding   | noncoding | noncoding | noncoding |
| MSTRG. 156314. 1  |              | XLOC_159170 | 385 coding   | coding    | noncoding | noncoding |
| MSTRG. 156364. 1  | LOC102724618 | XLOC_159191 | 294 coding   | noncoding | noncoding | noncoding |
| MSTRG. 156374. 1  | LOC102724618 | XLOC_159194 | 351 coding   | noncoding | noncoding | noncoding |

|                 |              |             |              |           |           |           |
|-----------------|--------------|-------------|--------------|-----------|-----------|-----------|
| XR_002957369.1  | BICD1        | XLOC_159197 | 6585 coding  | coding    | coding    | coding    |
| MSTRG.156379.1  | BICD1        | XLOC_159198 | 262 coding   | noncoding | noncoding | noncoding |
| MSTRG.156384.1  | BICD1        | XLOC_159203 | 248 coding   | noncoding | noncoding | noncoding |
| MSTRG.156399.1  | FGD4         | XLOC_159205 | 264 coding   | noncoding | noncoding | noncoding |
| MSTRG.156414.1  |              | XLOC_159219 | 266 coding   | noncoding | noncoding | noncoding |
| MSTRG.156420.1  | PKP2         | XLOC_159221 | 201 coding   | noncoding | noncoding | noncoding |
| MSTRG.156440.1  |              | XLOC_159235 | 346 coding   | coding    | noncoding | noncoding |
| MSTRG.156456.1  |              | XLOC_159245 | 349 coding   | coding    | noncoding | noncoding |
| MSTRG.156469.1  |              | XLOC_159248 | 323 coding   | noncoding | noncoding | noncoding |
| MSTRG.156492.1  |              | XLOC_159259 | 247 coding   | coding    | noncoding | noncoding |
| MSTRG.156525.1  |              | XLOC_159277 | 291 coding   | coding    | noncoding | noncoding |
| MSTRG.156567.1  |              | XLOC_159301 | 262 coding   | noncoding | noncoding | noncoding |
| MSTRG.156721.1  | C12orf40     | XLOC_159337 | 311 coding   | noncoding | noncoding | noncoding |
| MSTRG.156623.1  |              | XLOC_159367 | 320 coding   | noncoding | noncoding | noncoding |
| MSTRG.156889.19 | LRRK2        | XLOC_159371 | 2321 coding  | coding    | noncoding | coding    |
| NM_173600.2     | MUC19        | XLOC_159375 | 24727 coding | coding    | noncoding | coding    |
| MSTRG.156627.1  |              | XLOC_159377 | 309 coding   | noncoding | noncoding | noncoding |
| MSTRG.156669.1  | CNTN1        | XLOC_159383 | 283 coding   | noncoding | noncoding | noncoding |
| MSTRG.156670.1  | CNTN1        | XLOC_159384 | 293 coding   | noncoding | noncoding | noncoding |
| MSTRG.156685.1  | CNTN1        | XLOC_159393 | 306 coding   | noncoding | noncoding | noncoding |
| MSTRG.156694.1  |              | XLOC_159412 | 250 coding   | noncoding | noncoding | noncoding |
| XM_011538459.2  | PPHLN1       | XLOC_159426 | 3599 coding  | coding    | coding    | coding    |
| MSTRG.156834.1  | PRICKLE1     | XLOC_159442 | 296 coding   | noncoding | noncoding | noncoding |
| MSTRG.156810.1  |              | XLOC_159450 | 286 coding   | noncoding | noncoding | noncoding |
| MSTRG.156848.1  |              | XLOC_159466 | 276 coding   | noncoding | noncoding | noncoding |
| MSTRG.156854.1  |              | XLOC_159472 | 246 coding   | noncoding | noncoding | noncoding |
| MSTRG.156967.3  | NELL2        | XLOC_159503 | 3215 coding  | coding    | coding    | noncoding |
| MSTRG.156905.1  |              | XLOC_159505 | 232 coding   | noncoding | noncoding | noncoding |
| MSTRG.156911.1  |              | XLOC_159508 | 295 coding   | noncoding | noncoding | noncoding |
| MSTRG.156939.1  |              | XLOC_159514 | 266 coding   | noncoding | noncoding | noncoding |
| MSTRG.156922.1  |              | XLOC_159537 | 275 coding   | noncoding | noncoding | noncoding |
| MSTRG.156925.1  |              | XLOC_159539 | 311 coding   | noncoding | noncoding | noncoding |
| MSTRG.157010.1  |              | XLOC_159583 | 310 coding   | noncoding | noncoding | noncoding |
| MSTRG.157012.1  |              | XLOC_159584 | 301 coding   | noncoding | noncoding | noncoding |
| MSTRG.157585.1  | LOC100288798 | XLOC_159607 | 265 coding   | noncoding | noncoding | noncoding |
| MSTRG.157589.1  | LOC100288798 | XLOC_159611 | 688 coding   | noncoding | noncoding | noncoding |
| MSTRG.157306.1  |              | XLOC_159664 | 293 coding   | noncoding | noncoding | noncoding |
| MSTRG.157315.1  |              | XLOC_159674 | 288 coding   | noncoding | noncoding | noncoding |
| MSTRG.157348.1  |              | XLOC_159696 | 307 coding   | noncoding | noncoding | noncoding |
| MSTRG.157349.1  |              | XLOC_159697 | 257 coding   | noncoding | noncoding | noncoding |
| MSTRG.157426.1  | RAPGEF3      | XLOC_159725 | 342 coding   | noncoding | noncoding | noncoding |
| MSTRG.157494.1  |              | XLOC_159755 | 264 coding   | noncoding | noncoding | noncoding |
| MSTRG.157510.1  | C12orf54     | XLOC_159758 | 211 coding   | noncoding | noncoding | noncoding |

|                  |              |             |             |           |           |           |
|------------------|--------------|-------------|-------------|-----------|-----------|-----------|
| MSTRG. 157561. 1 | ARF3         | XLOC_159782 | 4597 coding | coding    | coding    | noncoding |
| MSTRG. 157736. 2 | KMT2D        | XLOC_159790 | 2997 coding | noncoding | coding    | coding    |
| MSTRG. 157737. 1 | KMT2D        | XLOC_159791 | 1327 coding | noncoding | coding    | coding    |
| MSTRG. 157738. 1 | KMT2D        | XLOC_159792 | 403 coding  | noncoding | noncoding | noncoding |
| MSTRG. 157739. 1 | KMT2D        | XLOC_159793 | 469 coding  | noncoding | noncoding | noncoding |
| MSTRG. 157740. 1 | KMT2D        | XLOC_159794 | 294 coding  | noncoding | noncoding | noncoding |
| MSTRG. 157741. 1 | KMT2D        | XLOC_159795 | 884 coding  | coding    | noncoding | noncoding |
| MSTRG. 157792. 1 |              | XLOC_159802 | 442 coding  | noncoding | coding    | noncoding |
| MSTRG. 157770. 1 | SPATS2       | XLOC_159817 | 232 coding  | noncoding | noncoding | noncoding |
| MSTRG. 157825. 4 | TMBIM6       | XLOC_159821 | 2771 coding | coding    | coding    | coding    |
| MSTRG. 157822. 1 |              | XLOC_159823 | 283 coding  | noncoding | noncoding | noncoding |
| MSTRG. 157839. 1 | NCKAP5L      | XLOC_159833 | 315 coding  | noncoding | noncoding | noncoding |
| NM_020039. 4     | ASIC1        | XLOC_159845 | 4024 coding | coding    | coding    | coding    |
| MSTRG. 157878. 1 | FAM186A      | XLOC_159857 | 264 coding  | noncoding | noncoding | noncoding |
| XM_024448825. 1  | LARP4        | XLOC_159859 | 6480 coding | coding    | coding    | coding    |
| NM_001352312. 2  | LARP4        | XLOC_159859 | 6490 coding | coding    | coding    | coding    |
| NM_001352314. 1  | LARP4        | XLOC_159859 | 6371 coding | coding    | coding    | coding    |
| MSTRG. 157951. 1 | DIP2B        | XLOC_159865 | 549 coding  | noncoding | noncoding | noncoding |
| MSTRG. 157963. 1 | DIP2B        | XLOC_159876 | 631 coding  | noncoding | noncoding | noncoding |
| MSTRG. 157970. 1 | DIP2B        | XLOC_159882 | 213 coding  | noncoding | noncoding | noncoding |
| MSTRG. 157918. 1 | ATF1         | XLOC_159888 | 276 coding  | noncoding | noncoding | noncoding |
| MSTRG. 157913. 1 | TMPRSS12     | XLOC_159890 | 210 coding  | noncoding | noncoding | noncoding |
| MSTRG. 157927. 1 |              | XLOC_159904 | 279 coding  | noncoding | noncoding | noncoding |
| MSTRG. 157925. 1 |              | XLOC_159905 | 292 coding  | noncoding | noncoding | noncoding |
| MSTRG. 157974. 4 | TFCP2        | XLOC_159907 | 518 coding  | noncoding | noncoding | coding    |
| MSTRG. 158042. 1 | CELA1        | XLOC_159916 | 222 coding  | noncoding | noncoding | noncoding |
| MSTRG. 157991. 1 |              | XLOC_159927 | 219 coding  | noncoding | noncoding | noncoding |
| MSTRG. 158002. 1 | SCN8A        | XLOC_159931 | 269 coding  | noncoding | noncoding | noncoding |
| XM_005268824. 3  | NR4A1        | XLOC_159945 | 2849 coding | coding    | coding    | coding    |
| MSTRG. 158085. 1 |              | XLOC_159950 | 238 coding  | noncoding | noncoding | noncoding |
| MSTRG. 158114. 1 | C12orf80     | XLOC_159955 | 275 coding  | noncoding | noncoding | noncoding |
| MSTRG. 158134. 1 |              | XLOC_159963 | 289 coding  | noncoding | noncoding | noncoding |
| MSTRG. 158165. 1 | KRT73        | XLOC_159970 | 1568 coding | coding    | noncoding | coding    |
| MSTRG. 158145. 1 | KRT2         | XLOC_159974 | 223 coding  | noncoding | noncoding | noncoding |
| MSTRG. 158150. 1 |              | XLOC_159978 | 237 coding  | noncoding | noncoding | noncoding |
| NM_003109. 1     | SP1          | XLOC_160003 | 7598 coding | coding    | coding    | coding    |
| NM_018953. 3     | HOXC5        | XLOC_160035 | 1613 coding | coding    | coding    | coding    |
| NM_001184976. 2  | NCKAP1L      | XLOC_160068 | 8898 coding | coding    | coding    | coding    |
| MSTRG. 158341. 1 | DCD          | XLOC_160076 | 268 coding  | coding    | noncoding | noncoding |
| MSTRG. 158411. 2 | LOC107984515 | XLOC_160089 | 5539 coding | coding    | noncoding | noncoding |
| MSTRG. 158380. 1 |              | XLOC_160096 | 290 coding  | noncoding | noncoding | noncoding |
| MSTRG. 158388. 1 |              | XLOC_160101 | 247 coding  | noncoding | noncoding | noncoding |
| MSTRG. 158389. 1 |              | XLOC_160102 | 219 coding  | noncoding | noncoding | noncoding |

|                  |           |             |              |           |           |           |
|------------------|-----------|-------------|--------------|-----------|-----------|-----------|
| MSTRG. 158395. 1 |           | XLOC_160110 | 298 coding   | coding    | noncoding | noncoding |
| MSTRG. 158403. 1 |           | XLOC_160118 | 300 coding   | noncoding | noncoding | noncoding |
| MSTRG. 158407. 1 |           | XLOC_160123 | 230 coding   | noncoding | noncoding | noncoding |
| MSTRG. 158440. 1 |           | XLOC_160133 | 301 coding   | noncoding | noncoding | noncoding |
| MSTRG. 158471. 1 |           | XLOC_160150 | 430 coding   | noncoding | noncoding | noncoding |
| MSTRG. 158515. 1 | SLC39A5   | XLOC_160167 | 266 coding   | noncoding | noncoding | noncoding |
| NM_144576. 4     | COQ10A    | XLOC_160175 | 1570 coding  | coding    | coding    | coding    |
| MSTRG. 158553. 4 | STAT2     | XLOC_160182 | 4738 coding  | coding    | coding    | coding    |
| MSTRG. 158542. 1 |           | XLOC_160184 | 272 coding   | noncoding | noncoding | noncoding |
| MSTRG. 158582. 5 | PRIM1     | XLOC_160197 | 1463 coding  | coding    | noncoding | noncoding |
| MSTRG. 158575. 1 | HSD17B6   | XLOC_160199 | 316 coding   | noncoding | noncoding | noncoding |
| NM_007224. 4     | NXPH4     | XLOC_160227 | 1805 coding  | coding    | coding    | coding    |
| NR_048562. 1     | SHMT2     | XLOC_160229 | 2305 coding  | coding    | coding    | coding    |
| NM_005538. 4     | INHBC     | XLOC_160235 | 3202 coding  | coding    | coding    | coding    |
| MSTRG. 158683. 1 | ARHGAP9   | XLOC_160238 | 372 coding   | noncoding | noncoding | noncoding |
| MSTRG. 158642. 1 | KIF5A     | XLOC_160243 | 308 coding   | noncoding | noncoding | noncoding |
| MSTRG. 158679. 1 |           | XLOC_160250 | 211 coding   | noncoding | noncoding | noncoding |
| MSTRG. 158676. 1 |           | XLOC_160251 | 495 coding   | noncoding | noncoding | noncoding |
| MSTRG. 158768. 1 | OS9       | XLOC_160255 | 276 coding   | noncoding | noncoding | noncoding |
| MSTRG. 158773. 1 | CTDSP2    | XLOC_160258 | 5660 coding  | coding    | coding    | noncoding |
| MSTRG. 158735. 1 | LRIG3     | XLOC_160288 | 275 coding   | noncoding | noncoding | noncoding |
| MSTRG. 158762. 1 |           | XLOC_160303 | 305 coding   | noncoding | noncoding | noncoding |
| MSTRG. 158763. 1 |           | XLOC_160304 | 288 coding   | coding    | noncoding | noncoding |
| NR_073055. 1     | SLC16A7   | XLOC_160305 | 12053 coding | coding    | coding    | coding    |
| MSTRG. 158888. 1 | SLC16A7   | XLOC_160325 | 271 coding   | noncoding | noncoding | noncoding |
| MSTRG. 158792. 1 |           | XLOC_160331 | 304 coding   | noncoding | noncoding | noncoding |
| MSTRG. 158817. 1 |           | XLOC_160343 | 232 coding   | noncoding | noncoding | noncoding |
| MSTRG. 158820. 1 |           | XLOC_160345 | 281 coding   | noncoding | noncoding | noncoding |
| MSTRG. 158840. 1 |           | XLOC_160356 | 318 coding   | noncoding | noncoding | noncoding |
| MSTRG. 158851. 1 |           | XLOC_160359 | 267 coding   | noncoding | noncoding | noncoding |
| MSTRG. 159007. 1 | MON2      | XLOC_160412 | 253 coding   | noncoding | noncoding | noncoding |
| MSTRG. 158940. 1 | PPM1H     | XLOC_160439 | 267 coding   | noncoding | noncoding | noncoding |
| MSTRG. 158923. 1 |           | XLOC_160487 | 268 coding   | noncoding | noncoding | noncoding |
| MSTRG. 158928. 1 |           | XLOC_160491 | 390 coding   | coding    | noncoding | noncoding |
| MSTRG. 159038. 1 | SRGAP1    | XLOC_160500 | 325 coding   | noncoding | noncoding | noncoding |
| MSTRG. 159069. 2 | C12orf66  | XLOC_160512 | 306 coding   | coding    | noncoding | noncoding |
| MSTRG. 159065. 1 |           | XLOC_160514 | 284 coding   | noncoding | noncoding | noncoding |
| MSTRG. 159072. 1 | C12orf56  | XLOC_160515 | 300 coding   | noncoding | noncoding | noncoding |
| MSTRG. 159073. 1 | C12orf56  | XLOC_160516 | 273 coding   | noncoding | noncoding | noncoding |
| MSTRG. 159095. 1 | XPOT      | XLOC_160519 | 237 coding   | noncoding | noncoding | noncoding |
| NM_001330187. 1  | TBC1D30   | XLOC_160548 | 7706 coding  | coding    | coding    | coding    |
| MSTRG. 159168. 1 | TBC1D30   | XLOC_160551 | 286 coding   | noncoding | noncoding | noncoding |
| MSTRG. 159107. 1 | LINC02389 | XLOC_160558 | 277 coding   | noncoding | noncoding | noncoding |

|                  |              |             |              |           |           |           |
|------------------|--------------|-------------|--------------|-----------|-----------|-----------|
| MSTRG. 159119. 1 |              | XLOC_160584 | 284 coding   | noncoding | noncoding | noncoding |
| MSTRG. 159205. 1 | MSRB3        | XLOC_160588 | 213 coding   | noncoding | noncoding | noncoding |
| MSTRG. 159212. 1 | MSRB3        | XLOC_160590 | 378 coding   | noncoding | noncoding | noncoding |
| MSTRG. 159230. 1 | LOC100507065 | XLOC_160599 | 311 coding   | noncoding | noncoding | noncoding |
| NM_003483. 4     | HMG2A        | XLOC_160605 | 4140 coding  | noncoding | coding    | noncoding |
| MSTRG. 159236. 3 | TMBIM4       | XLOC_160618 | 1068 coding  | coding    | noncoding | noncoding |
| MSTRG. 159371. 1 | GRIP1        | XLOC_160655 | 286 coding   | noncoding | noncoding | noncoding |
| MSTRG. 159277. 1 |              | XLOC_160711 | 272 coding   | noncoding | noncoding | noncoding |
| MSTRG. 159286. 1 |              | XLOC_160717 | 273 coding   | noncoding | noncoding | noncoding |
| MSTRG. 159304. 1 | LINC02408    | XLOC_160725 | 224 coding   | noncoding | noncoding | noncoding |
| MSTRG. 159527. 1 |              | XLOC_160786 | 300 coding   | noncoding | noncoding | noncoding |
| MSTRG. 159560. 1 | LOC105369818 | XLOC_160797 | 270 coding   | noncoding | noncoding | noncoding |
| MSTRG. 159622. 1 | RAP1B        | XLOC_160829 | 529 coding   | noncoding | noncoding | noncoding |
| NM_018656. 5     | SLC35E3      | XLOC_160835 | 17722 coding | coding    | coding    | coding    |
| MSTRG. 159541. 1 |              | XLOC_160851 | 249 coding   | noncoding | noncoding | noncoding |
| MSTRG. 159547. 1 |              | XLOC_160854 | 485 coding   | noncoding | noncoding | noncoding |
| XR_001748876. 1  | YEATS4       | XLOC_160869 | 2864 coding  | coding    | coding    | coding    |
| MSTRG. 159721. 1 |              | XLOC_160908 | 278 coding   | noncoding | noncoding | noncoding |
| MSTRG. 159725. 1 |              | XLOC_160910 | 211 coding   | noncoding | noncoding | noncoding |
| MSTRG. 159723. 1 |              | XLOC_160911 | 327 coding   | noncoding | noncoding | noncoding |
| MSTRG. 159726. 1 |              | XLOC_160912 | 442 coding   | coding    | noncoding | noncoding |
| MSTRG. 159730. 1 |              | XLOC_160914 | 273 coding   | noncoding | noncoding | noncoding |
| MSTRG. 159773. 1 | KCNMB4       | XLOC_160939 | 267 coding   | noncoding | noncoding | noncoding |
| XR_001749196. 1  | LOC105369828 | XLOC_160943 | 4085 coding  | coding    | noncoding | noncoding |
| MSTRG. 159817. 1 | PTPRR        | XLOC_160949 | 224 coding   | noncoding | noncoding | noncoding |
| MSTRG. 159822. 1 | PTPRR        | XLOC_160951 | 354 coding   | noncoding | noncoding | noncoding |
| MSTRG. 159829. 1 |              | XLOC_160959 | 270 coding   | noncoding | noncoding | noncoding |
| MSTRG. 159833. 1 | TSPAN8       | XLOC_160961 | 224 coding   | noncoding | noncoding | noncoding |
| MSTRG. 159837. 1 |              | XLOC_160964 | 297 coding   | noncoding | noncoding | noncoding |
| MSTRG. 159845. 1 | LOC105369832 | XLOC_160966 | 247 coding   | noncoding | noncoding | noncoding |
| MSTRG. 159848. 1 |              | XLOC_160971 | 279 coding   | noncoding | noncoding | noncoding |
| MSTRG. 159880. 1 | LOC105369833 | XLOC_160976 | 282 coding   | noncoding | coding    | noncoding |
| MSTRG. 159917. 1 | THAP2        | XLOC_160982 | 218 coding   | noncoding | noncoding | noncoding |
| MSTRG. 159886. 1 | TMEM19       | XLOC_160985 | 307 coding   | noncoding | noncoding | noncoding |
| MSTRG. 159891. 1 |              | XLOC_160991 | 284 coding   | noncoding | noncoding | noncoding |
| MSTRG. 159929. 1 |              | XLOC_161009 | 264 coding   | coding    | noncoding | noncoding |
| MSTRG. 159976. 1 | TRHDE        | XLOC_161012 | 344 coding   | coding    | noncoding | noncoding |
| MSTRG. 159992. 1 | TRHDE        | XLOC_161019 | 304 coding   | noncoding | noncoding | noncoding |
| MSTRG. 159935. 1 |              | XLOC_161024 | 225 coding   | noncoding | noncoding | noncoding |
| MSTRG. 159938. 1 |              | XLOC_161026 | 264 coding   | noncoding | noncoding | noncoding |
| MSTRG. 159972. 1 |              | XLOC_161034 | 252 coding   | noncoding | noncoding | noncoding |
| MSTRG. 160001. 1 |              | XLOC_161037 | 291 coding   | coding    | noncoding | noncoding |
| MSTRG. 160052. 1 |              | XLOC_161061 | 324 coding   | noncoding | noncoding | noncoding |

|                  |              |             |              |           |           |           |
|------------------|--------------|-------------|--------------|-----------|-----------|-----------|
| MSTRG. 160157. 1 | LOC105369844 | XLOC_161116 | 205 coding   | noncoding | noncoding | noncoding |
| MSTRG. 160258. 2 | OSBPL8       | XLOC_161134 | 2636 coding  | noncoding | noncoding | noncoding |
| MSTRG. 160202. 1 |              | XLOC_161169 | 259 coding   | noncoding | noncoding | noncoding |
| MSTRG. 160207. 1 |              | XLOC_161174 | 263 coding   | noncoding | noncoding | noncoding |
| MSTRG. 160221. 1 |              | XLOC_161181 | 382 coding   | noncoding | noncoding | noncoding |
| MSTRG. 160284. 1 |              | XLOC_161182 | 366 coding   | noncoding | noncoding | noncoding |
| MSTRG. 160394. 1 | SYT1         | XLOC_161220 | 299 coding   | noncoding | noncoding | noncoding |
| MSTRG. 160402. 1 | SYT1         | XLOC_161225 | 284 coding   | noncoding | noncoding | noncoding |
| MSTRG. 160413. 1 |              | XLOC_161229 | 277 coding   | coding    | coding    | noncoding |
| MSTRG. 160415. 1 |              | XLOC_161231 | 286 coding   | noncoding | noncoding | noncoding |
| NM_001368062. 1  | OTOGL        | XLOC_161253 | 10859 coding | coding    | coding    | coding    |
| MSTRG. 160465. 1 | OTOGL        | XLOC_161256 | 317 coding   | noncoding | noncoding | noncoding |
| MSTRG. 160642. 1 | ACSS3        | XLOC_161285 | 332 coding   | noncoding | noncoding | noncoding |
| MSTRG. 160650. 1 | PPFIA2       | XLOC_161288 | 314 coding   | coding    | noncoding | noncoding |
| MSTRG. 160654. 1 | PPFIA2       | XLOC_161291 | 203 coding   | noncoding | noncoding | noncoding |
| MSTRG. 160499. 1 |              | XLOC_161297 | 259 coding   | noncoding | noncoding | noncoding |
| MSTRG. 160509. 1 |              | XLOC_161301 | 418 coding   | noncoding | noncoding | noncoding |
| MSTRG. 160510. 1 |              | XLOC_161302 | 280 coding   | noncoding | noncoding | noncoding |
| MSTRG. 160514. 1 | LOC105369873 | XLOC_161303 | 279 coding   | noncoding | noncoding | noncoding |
| MSTRG. 160525. 1 |              | XLOC_161316 | 299 coding   | noncoding | noncoding | noncoding |
| MSTRG. 160790. 1 | TMTC2        | XLOC_161324 | 221 coding   | noncoding | noncoding | noncoding |
| MSTRG. 160793. 1 | TMTC2        | XLOC_161327 | 220 coding   | noncoding | noncoding | noncoding |
| MSTRG. 160799. 1 | TMTC2        | XLOC_161333 | 272 coding   | noncoding | noncoding | noncoding |
| MSTRG. 160540. 1 |              | XLOC_161337 | 260 coding   | noncoding | noncoding | noncoding |
| MSTRG. 160553. 1 |              | XLOC_161346 | 257 coding   | noncoding | noncoding | noncoding |
| MSTRG. 160574. 1 | LOC107984536 | XLOC_161357 | 287 coding   | noncoding | noncoding | noncoding |
| MSTRG. 160593. 1 | LOC105369875 | XLOC_161368 | 263 coding   | noncoding | noncoding | noncoding |
| MSTRG. 160598. 1 |              | XLOC_161370 | 223 coding   | coding    | noncoding | noncoding |
| MSTRG. 160610. 1 | LOC102724680 | XLOC_161376 | 306 coding   | noncoding | noncoding | noncoding |
| XM_011538817. 2  | LRRIQ1       | XLOC_161378 | 6734 coding  | coding    | coding    | coding    |
| MSTRG. 160748. 1 | MGAT4C       | XLOC_161402 | 576 coding   | noncoding | noncoding | noncoding |
| MSTRG. 160757. 1 | MGAT4C       | XLOC_161408 | 243 coding   | noncoding | noncoding | noncoding |
| MSTRG. 160761. 1 | MGAT4C       | XLOC_161410 | 231 coding   | noncoding | noncoding | noncoding |
| MSTRG. 160762. 1 | MGAT4C       | XLOC_161411 | 307 coding   | noncoding | noncoding | noncoding |
| MSTRG. 160765. 1 | MGAT4C       | XLOC_161414 | 298 coding   | noncoding | noncoding | noncoding |
| MSTRG. 160768. 1 | MGAT4C       | XLOC_161416 | 291 coding   | noncoding | noncoding | noncoding |
| MSTRG. 160726. 1 |              | XLOC_161427 | 210 coding   | noncoding | noncoding | noncoding |
| MSTRG. 160781. 1 |              | XLOC_161437 | 212 coding   | noncoding | noncoding | noncoding |
| MSTRG. 160802. 1 |              | XLOC_161452 | 287 coding   | noncoding | noncoding | noncoding |
| MSTRG. 160837. 1 |              | XLOC_161472 | 298 coding   | noncoding | noncoding | noncoding |
| MSTRG. 160866. 1 |              | XLOC_161508 | 261 coding   | noncoding | noncoding | noncoding |
| MSTRG. 160904. 1 |              | XLOC_161529 | 256 coding   | noncoding | noncoding | noncoding |
| MSTRG. 160927. 1 |              | XLOC_161543 | 322 coding   | noncoding | noncoding | noncoding |

|                  |              |             |             |           |           |           |
|------------------|--------------|-------------|-------------|-----------|-----------|-----------|
| MSTRG. 160940. 1 | DCN          | XLOC_161546 | 207 coding  | noncoding | noncoding | noncoding |
| MSTRG. 160957. 1 | LOC105369898 | XLOC_161548 | 221 coding  | noncoding | noncoding | noncoding |
| MSTRG. 160958. 1 | LOC105369898 | XLOC_161549 | 264 coding  | noncoding | noncoding | noncoding |
| MSTRG. 161145. 1 | LOC643339    | XLOC_161641 | 476 coding  | noncoding | noncoding | noncoding |
| MSTRG. 161321. 1 | CRADD        | XLOC_161691 | 300 coding  | noncoding | noncoding | noncoding |
| MSTRG. 161330. 1 | LOC101928731 | XLOC_161700 | 238 coding  | noncoding | noncoding | noncoding |
| MSTRG. 161340. 1 | CRADD        | XLOC_161709 | 228 coding  | noncoding | noncoding | noncoding |
| MSTRG. 161354. 1 | CRADD        | XLOC_161714 | 392 coding  | noncoding | noncoding | noncoding |
| MSTRG. 161361. 1 | LOC105369911 | XLOC_161717 | 239 coding  | noncoding | noncoding | noncoding |
| MSTRG. 161218. 1 | LOC105369912 | XLOC_161722 | 447 coding  | noncoding | noncoding | noncoding |
| MSTRG. 161228. 1 |              | XLOC_161732 | 213 coding  | noncoding | noncoding | noncoding |
| MSTRG. 161379. 1 |              | XLOC_161760 | 296 coding  | noncoding | noncoding | noncoding |
| MSTRG. 161383. 1 |              | XLOC_161807 | 205 coding  | noncoding | noncoding | noncoding |
| MSTRG. 161398. 1 |              | XLOC_161813 | 252 coding  | noncoding | noncoding | noncoding |
| MSTRG. 161473. 1 | LOC105369917 | XLOC_161828 | 234 coding  | noncoding | noncoding | noncoding |
| MSTRG. 161483. 1 |              | XLOC_161832 | 282 coding  | noncoding | noncoding | noncoding |
| MSTRG. 161508. 1 | METAP2       | XLOC_161836 | 329 coding  | noncoding | noncoding | noncoding |
| MSTRG. 161502. 1 |              | XLOC_161842 | 206 coding  | noncoding | noncoding | noncoding |
| MSTRG. 161516. 1 | NTN4         | XLOC_161847 | 469 coding  | noncoding | noncoding | noncoding |
| MSTRG. 161522. 1 | NTN4         | XLOC_161850 | 200 coding  | noncoding | noncoding | noncoding |
| MSTRG. 161539. 1 | CCDC38       | XLOC_161855 | 217 coding  | noncoding | noncoding | noncoding |
| NM_005230. 4     | ELK3         | XLOC_161867 | 4201 coding | coding    | coding    | coding    |
| MSTRG. 161710. 1 |              | XLOC_161870 | 323 coding  | noncoding | noncoding | noncoding |
| MSTRG. 161586. 1 |              | XLOC_161871 | 229 coding  | noncoding | noncoding | noncoding |
| NR_152618. 1     | RMST         | XLOC_161898 | 2399 coding | noncoding | noncoding | noncoding |
| MSTRG. 161679. 1 |              | XLOC_161915 | 477 coding  | noncoding | noncoding | noncoding |
| MSTRG. 161724. 1 |              | XLOC_161928 | 270 coding  | noncoding | noncoding | noncoding |
| MSTRG. 161737. 1 |              | XLOC_161938 | 242 coding  | noncoding | noncoding | noncoding |
| MSTRG. 161744. 1 | TMPO         | XLOC_161944 | 304 coding  | noncoding | noncoding | noncoding |
| MSTRG. 161733. 1 |              | XLOC_161946 | 273 coding  | noncoding | noncoding | noncoding |
| MSTRG. 161863. 1 | ANKS1B       | XLOC_161968 | 238 coding  | noncoding | noncoding | noncoding |
| MSTRG. 161868. 1 | ANKS1B       | XLOC_161973 | 247 coding  | coding    | noncoding | noncoding |
| MSTRG. 161869. 1 | ANKS1B       | XLOC_161974 | 214 coding  | noncoding | noncoding | noncoding |
| MSTRG. 161809. 1 | DEPDC4       | XLOC_162005 | 275 coding  | noncoding | noncoding | noncoding |
| MSTRG. 161812. 1 | DEPDC4       | XLOC_162008 | 296 coding  | noncoding | noncoding | noncoding |
| MSTRG. 161817. 1 | SCYL2        | XLOC_162013 | 285 coding  | noncoding | noncoding | noncoding |
| MSTRG. 161791. 1 | SLC17A8      | XLOC_162015 | 257 coding  | noncoding | noncoding | noncoding |
| MSTRG. 161793. 1 | SLC17A8      | XLOC_162016 | 281 coding  | noncoding | noncoding | noncoding |
| MSTRG. 161795. 1 | SLC17A8      | XLOC_162017 | 227 coding  | noncoding | noncoding | noncoding |
| MSTRG. 161788. 1 |              | XLOC_162020 | 271 coding  | noncoding | noncoding | noncoding |
| MSTRG. 161798. 1 |              | XLOC_162024 | 303 coding  | coding    | noncoding | noncoding |
| MSTRG. 161830. 1 | ANO4         | XLOC_162033 | 477 coding  | noncoding | noncoding | noncoding |
| MSTRG. 161881. 1 |              | XLOC_162041 | 212 coding  | noncoding | noncoding | noncoding |

|                  |              |             |             |           |           |           |
|------------------|--------------|-------------|-------------|-----------|-----------|-----------|
| MSTRG. 161899. 1 |              | XLOC_162051 | 301 coding  | noncoding | noncoding | noncoding |
| MSTRG. 161902. 1 | DRAM1        | XLOC_162053 | 257 coding  | noncoding | noncoding | noncoding |
| MSTRG. 161914. 1 |              | XLOC_162057 | 214 coding  | noncoding | noncoding | noncoding |
| MSTRG. 161965. 1 | PARPBP       | XLOC_162070 | 261 coding  | noncoding | noncoding | noncoding |
| MSTRG. 161989. 1 | IGF1         | XLOC_162080 | 209 coding  | noncoding | noncoding | noncoding |
| MSTRG. 161997. 1 | LOC105369944 | XLOC_162084 | 522 coding  | noncoding | noncoding | noncoding |
| MSTRG. 161948. 1 | PAH          | XLOC_162092 | 205 coding  | noncoding | noncoding | noncoding |
| MSTRG. 161941. 1 |              | XLOC_162096 | 232 coding  | noncoding | noncoding | noncoding |
| NM_017564. 10    | STAB2        | XLOC_162138 | 8243 coding | coding    | coding    | coding    |
| MSTRG. 162027. 1 | NT5DC3       | XLOC_162144 | 317 coding  | noncoding | noncoding | noncoding |
| MSTRG. 162035. 1 | NT5DC3       | XLOC_162152 | 377 coding  | coding    | noncoding | noncoding |
| MSTRG. 162108. 1 | TTC41P       | XLOC_162160 | 246 coding  | noncoding | noncoding | noncoding |
| MSTRG. 162130. 1 | GLT8D2       | XLOC_162175 | 390 coding  | noncoding | noncoding | noncoding |
| MSTRG. 162386. 1 | TXNRD1       | XLOC_162194 | 251 coding  | noncoding | noncoding | noncoding |
| MSTRG. 162448. 1 | CHST11       | XLOC_162242 | 277 coding  | noncoding | noncoding | noncoding |
| MSTRG. 162209. 1 |              | XLOC_162332 | 214 coding  | coding    | noncoding | noncoding |
| NM_001145199. 2  | C12orf75     | XLOC_162344 | 1311 coding | coding    | noncoding | noncoding |
| MSTRG. 162230. 1 | C12orf75     | XLOC_162345 | 288 coding  | noncoding | noncoding | noncoding |
| MSTRG. 162241. 1 | LOC105369957 | XLOC_162351 | 250 coding  | noncoding | noncoding | noncoding |
| MSTRG. 162269. 1 |              | XLOC_162358 | 296 coding  | coding    | noncoding | noncoding |
| MSTRG. 162338. 1 |              | XLOC_162393 | 405 coding  | noncoding | noncoding | noncoding |
| MSTRG. 162345. 1 | TCP11L2      | XLOC_162398 | 1551 coding | noncoding | noncoding | noncoding |
| MSTRG. 162528. 1 | POLR3B       | XLOC_162400 | 256 coding  | noncoding | noncoding | noncoding |
| MSTRG. 162358. 2 | MTERF2       | XLOC_162430 | 1383 coding | coding    | coding    | noncoding |
| MSTRG. 162665. 1 | BTBD11       | XLOC_162452 | 286 coding  | noncoding | noncoding | noncoding |
| MSTRG. 162670. 1 | BTBD11       | XLOC_162453 | 289 coding  | noncoding | coding    | noncoding |
| MSTRG. 162555. 1 |              | XLOC_162460 | 238 coding  | noncoding | noncoding | noncoding |
| MSTRG. 162556. 1 |              | XLOC_162461 | 393 coding  | noncoding | noncoding | noncoding |
| MSTRG. 162560. 1 |              | XLOC_162462 | 251 coding  | noncoding | noncoding | noncoding |
| MSTRG. 162566. 1 |              | XLOC_162466 | 279 coding  | noncoding | noncoding | noncoding |
| MSTRG. 162595. 1 |              | XLOC_162478 | 289 coding  | noncoding | noncoding | noncoding |
| MSTRG. 162620. 7 | SELPLG       | XLOC_162483 | 3804 coding | noncoding | coding    | coding    |
| MSTRG. 162624. 9 | CORO1C       | XLOC_162484 | 3731 coding | coding    | coding    | coding    |
| MSTRG. 162624. 8 | CORO1C       | XLOC_162484 | 3587 coding | coding    | coding    | coding    |
| MSTRG. 162618. 1 |              | XLOC_162492 | 241 coding  | noncoding | noncoding | noncoding |
| MSTRG. 162675. 1 | SVOP         | XLOC_162495 | 286 coding  | noncoding | noncoding | noncoding |
| XM_017020050. 1  | USP30        | XLOC_162497 | 3964 coding | coding    | coding    | coding    |
| MSTRG. 162716. 1 | ACACB        | XLOC_162505 | 262 coding  | noncoding | noncoding | noncoding |
| MSTRG. 162717. 1 | ACACB        | XLOC_162506 | 249 coding  | noncoding | noncoding | noncoding |
| MSTRG. 162699. 1 |              | XLOC_162510 | 237 coding  | noncoding | noncoding | noncoding |
| MSTRG. 162765. 4 | MYO1H        | XLOC_162511 | 316 coding  | coding    | noncoding | noncoding |
| NM_000431. 4     | MVK          | XLOC_162519 | 2833 coding | coding    | coding    | coding    |
| MSTRG. 162735. 1 |              | XLOC_162524 | 284 coding  | noncoding | noncoding | noncoding |

|                   |              |             |              |           |           |           |
|-------------------|--------------|-------------|--------------|-----------|-----------|-----------|
| MSTRG. 162738. 1  |              | XLOC_162526 | 293 coding   | noncoding | noncoding | noncoding |
| MSTRG. 162793. 7  | GIT2         | XLOC_162541 | 5477 coding  | coding    | coding    | noncoding |
| MSTRG. 162813. 1  | C12orf76     | XLOC_162544 | 299 coding   | noncoding | noncoding | noncoding |
| MSTRG. 162821. 1  | IFT81        | XLOC_162549 | 236 coding   | noncoding | noncoding | noncoding |
| MSTRG. 162822. 1  | IFT81        | XLOC_162550 | 395 coding   | noncoding | noncoding | noncoding |
| MSTRG. 162824. 1  | IFT81        | XLOC_162551 | 311 coding   | noncoding | noncoding | noncoding |
| MSTRG. 162828. 1  | IFT81        | XLOC_162552 | 285 coding   | noncoding | noncoding | noncoding |
| MSTRG. 162816. 1  | IFT81        | XLOC_162553 | 272 coding   | noncoding | noncoding | noncoding |
| MSTRG. 162839. 1  |              | XLOC_162558 | 248 coding   | noncoding | noncoding | noncoding |
| MSTRG. 162829. 1  |              | XLOC_162560 | 300 coding   | noncoding | noncoding | noncoding |
| MSTRG. 162853. 15 | RAD9B        | XLOC_162567 | 9911 coding  | coding    | noncoding | coding    |
| MSTRG. 162845. 1  |              | XLOC_162569 | 301 coding   | noncoding | noncoding | noncoding |
| MSTRG. 162864. 1  |              | XLOC_162574 | 274 coding   | noncoding | noncoding | noncoding |
| MSTRG. 162868. 1  | CCDC63       | XLOC_162576 | 271 coding   | noncoding | noncoding | noncoding |
| XM_011538061. 3   | CUX2         | XLOC_162578 | 13706 coding | coding    | coding    | coding    |
| MSTRG. 162901. 1  | CUX2         | XLOC_162586 | 264 coding   | noncoding | noncoding | noncoding |
| MSTRG. 162879. 1  |              | XLOC_162594 | 269 coding   | noncoding | noncoding | noncoding |
| MSTRG. 162945. 1  | SH2B3        | XLOC_162598 | 250 coding   | noncoding | noncoding | noncoding |
| MSTRG. 162920. 1  | ATXN2-AS     | XLOC_162607 | 312 coding   | noncoding | noncoding | noncoding |
| MSTRG. 162930. 1  | ACAD10       | XLOC_162610 | 303 coding   | noncoding | noncoding | noncoding |
| MSTRG. 162938. 1  | ALDH2        | XLOC_162613 | 271 coding   | noncoding | noncoding | noncoding |
| MSTRG. 162940. 1  | ALDH2        | XLOC_162615 | 250 coding   | noncoding | noncoding | noncoding |
| MSTRG. 162921. 1  |              | XLOC_162616 | 234 coding   | noncoding | noncoding | noncoding |
| NM_001143906. 1   | TRAFD1       | XLOC_162633 | 3179 coding  | noncoding | coding    | coding    |
| XM_011538613. 2   | PTPN11       | XLOC_162643 | 6109 coding  | coding    | coding    | coding    |
| MSTRG. 162957. 1  |              | XLOC_162645 | 272 coding   | noncoding | noncoding | noncoding |
| NM_001320151. 2   | OAS1         | XLOC_162651 | 2458 coding  | coding    | coding    | coding    |
| MSTRG. 163026. 1  |              | XLOC_162661 | 263 coding   | noncoding | noncoding | noncoding |
| MSTRG. 163095. 2  | DDX54        | XLOC_162663 | 1149 coding  | coding    | coding    | noncoding |
| MSTRG. 163100. 1  | IQCD         | XLOC_162665 | 288 coding   | noncoding | noncoding | noncoding |
| MSTRG. 163054. 1  |              | XLOC_162678 | 269 coding   | noncoding | noncoding | noncoding |
| MSTRG. 163124. 1  | LOC107984437 | XLOC_162707 | 245 coding   | noncoding | noncoding | noncoding |
| MSTRG. 163128. 1  |              | XLOC_162709 | 318 coding   | noncoding | noncoding | noncoding |
| MSTRG. 163177. 1  | LOC105370003 | XLOC_162722 | 236 coding   | noncoding | noncoding | noncoding |
| MSTRG. 163190. 1  | LOC105370003 | XLOC_162728 | 307 coding   | noncoding | noncoding | noncoding |
| MSTRG. 163157. 1  |              | XLOC_162738 | 246 coding   | noncoding | noncoding | noncoding |
| MSTRG. 163270. 9  | MED13L       | XLOC_162741 | 615 coding   | noncoding | noncoding | noncoding |
| MSTRG. 163208. 1  |              | XLOC_162749 | 244 coding   | noncoding | noncoding | noncoding |
| MSTRG. 163213. 1  |              | XLOC_162751 | 237 coding   | noncoding | noncoding | noncoding |
| MSTRG. 163230. 1  |              | XLOC_162757 | 269 coding   | noncoding | noncoding | noncoding |
| MSTRG. 163231. 1  |              | XLOC_162758 | 276 coding   | noncoding | noncoding | noncoding |
| MSTRG. 163255. 1  |              | XLOC_162790 | 253 coding   | noncoding | noncoding | noncoding |
| MSTRG. 163265. 1  | NOS1         | XLOC_162792 | 270 coding   | noncoding | noncoding | noncoding |

|                   |              |             |             |           |           |           |
|-------------------|--------------|-------------|-------------|-----------|-----------|-----------|
| MSTRG. 163268. 1  | NOS1         | XLOC_162793 | 208 coding  | noncoding | noncoding | noncoding |
| MSTRG. 163259. 1  |              | XLOC_162795 | 246 coding  | noncoding | noncoding | noncoding |
| MSTRG. 163260. 1  |              | XLOC_162796 | 228 coding  | noncoding | noncoding | noncoding |
| MSTRG. 163333. 1  | KSR2         | XLOC_162802 | 317 coding  | noncoding | noncoding | noncoding |
| MSTRG. 163335. 1  | KSR2         | XLOC_162803 | 214 coding  | noncoding | noncoding | noncoding |
| MSTRG. 163339. 1  | KSR2         | XLOC_162805 | 297 coding  | noncoding | noncoding | noncoding |
| MSTRG. 163340. 1  | KSR2         | XLOC_162806 | 236 coding  | noncoding | noncoding | noncoding |
| NM_001130112. 3   | RFC5         | XLOC_162808 | 2277 coding | coding    | coding    | coding    |
| MSTRG. 163379. 1  |              | XLOC_162820 | 238 coding  | noncoding | noncoding | noncoding |
| NM_194286. 4      | SRRM4        | XLOC_162831 | 8431 coding | coding    | coding    | coding    |
| MSTRG. 163410. 1  | HSPB8        | XLOC_162838 | 303 coding  | noncoding | noncoding | noncoding |
| MSTRG. 163439. 1  | LOC105370027 | XLOC_162849 | 269 coding  | noncoding | noncoding | noncoding |
| XM_005253909. 1   | PRKAB1       | XLOC_162852 | 2303 coding | coding    | coding    | coding    |
| MSTRG. 163543. 7  | PXN-AS1      | XLOC_162872 | 4545 coding | coding    | coding    | coding    |
| MSTRG. 163525. 1  |              | XLOC_162874 | 213 coding  | noncoding | noncoding | noncoding |
| MSTRG. 163530. 1  |              | XLOC_162876 | 302 coding  | noncoding | noncoding | noncoding |
| NM_176818. 3      | GATC         | XLOC_162879 | 4238 coding | coding    | coding    | coding    |
| XM_024449280. 1   | CABP1        | XLOC_162888 | 1908 coding | coding    | coding    | coding    |
| MSTRG. 163601. 4  | SPPL3        | XLOC_162898 | 511 coding  | coding    | noncoding | noncoding |
| MSTRG. 163632. 1  | LOC105370030 | XLOC_162909 | 301 coding  | noncoding | noncoding | noncoding |
| MSTRG. 163639. 1  | LOC105370032 | XLOC_162913 | 248 coding  | noncoding | noncoding | noncoding |
| MSTRG. 163641. 1  | LOC105370032 | XLOC_162915 | 292 coding  | noncoding | noncoding | noncoding |
| MSTRG. 163642. 1  | LOC105370032 | XLOC_162916 | 268 coding  | noncoding | noncoding | noncoding |
| MSTRG. 163619. 1  |              | XLOC_162920 | 260 coding  | noncoding | noncoding | noncoding |
| MSTRG. 163627. 1  |              | XLOC_162933 | 265 coding  | noncoding | noncoding | noncoding |
| MSTRG. 163656. 1  | LOC105370034 | XLOC_162936 | 254 coding  | noncoding | noncoding | noncoding |
| MSTRG. 163700. 1  | WDR66        | XLOC_162946 | 280 coding  | noncoding | noncoding | noncoding |
| NM_030765. 4      | B3GNT4       | XLOC_162955 | 2891 coding | coding    | coding    | coding    |
| MSTRG. 163725. 5  | CLIP1        | XLOC_162958 | 3251 coding | coding    | coding    | coding    |
| MSTRG. 163725. 6  | CLIP1        | XLOC_162958 | 1013 coding | coding    | coding    | noncoding |
| MSTRG. 163765. 1  | RSRC2        | XLOC_162961 | 6075 coding | coding    | coding    | noncoding |
| MSTRG. 163765. 5  | RSRC2        | XLOC_162961 | 1586 coding | coding    | coding    | noncoding |
| MSTRG. 163774. 1  | KNTC1        | XLOC_162964 | 265 coding  | noncoding | noncoding | noncoding |
| MSTRG. 163733. 1  |              | XLOC_162966 | 305 coding  | noncoding | noncoding | noncoding |
| MSTRG. 163734. 14 | HCAR2        | XLOC_162967 | 2051 coding | coding    | coding    | coding    |
| MSTRG. 163734. 16 | HCAR2        | XLOC_162967 | 2005 coding | coding    | coding    | coding    |
| MSTRG. 163747. 1  | CCDC62       | XLOC_162970 | 299 coding  | noncoding | noncoding | noncoding |
| MSTRG. 163749. 1  | CCDC62       | XLOC_162971 | 253 coding  | noncoding | noncoding | noncoding |
| NM_003959. 3      | HIP1R        | XLOC_162972 | 4509 coding | coding    | coding    | coding    |
| MSTRG. 163780. 1  | ABCB9        | XLOC_162979 | 200 coding  | noncoding | noncoding | noncoding |
| MSTRG. 163782. 1  | ABCB9        | XLOC_162980 | 281 coding  | noncoding | noncoding | noncoding |
| MSTRG. 163791. 1  | PITPNM2      | XLOC_162985 | 392 coding  | coding    | noncoding | noncoding |
| MSTRG. 163799. 1  |              | XLOC_162998 | 216 coding  | noncoding | noncoding | noncoding |

|                 |              |             |              |           |           |           |
|-----------------|--------------|-------------|--------------|-----------|-----------|-----------|
| NR_136910.1     | KMT5A        | XLOC_163000 | 2905 coding  | coding    | coding    | coding    |
| MSTRG.163829.1  |              | XLOC_163015 | 320 coding   | noncoding | noncoding | noncoding |
| XM_024449102.1  | DDX55        | XLOC_163018 | 2709 coding  | coding    | coding    | coding    |
| XM_017019718.1  | DDX55        | XLOC_163018 | 3033 coding  | coding    | coding    | coding    |
| MSTRG.163913.1  | ZNF664-RFLNA | XLOC_163040 | 227 coding   | noncoding | noncoding | noncoding |
| MSTRG.163923.2  | NCOR2        | XLOC_163044 | 1509 coding  | noncoding | coding    | coding    |
| MSTRG.163926.1  | NCOR2        | XLOC_163046 | 2472 coding  | noncoding | coding    | coding    |
| MSTRG.163929.1  | NCOR2        | XLOC_163048 | 1034 coding  | noncoding | noncoding | coding    |
| MSTRG.163930.1  | NCOR2        | XLOC_163049 | 578 coding   | noncoding | coding    | noncoding |
| MSTRG.163870.1  | SCARB1       | XLOC_163100 | 292 coding   | noncoding | noncoding | noncoding |
| MSTRG.163989.1  | LOC105370051 | XLOC_163104 | 351 coding   | noncoding | noncoding | noncoding |
| MSTRG.163990.25 | UBC          | XLOC_163105 | 2112 coding  | coding    | coding    | noncoding |
| MSTRG.164000.1  | BRI3BP       | XLOC_163116 | 255 coding   | noncoding | noncoding | noncoding |
| XM_011537854.2  | TMEM132B     | XLOC_163119 | 13816 coding | coding    | coding    | coding    |
| MSTRG.164021.1  | TMEM132B     | XLOC_163120 | 306 coding   | noncoding | noncoding | noncoding |
| MSTRG.164029.1  | TMEM132B     | XLOC_163123 | 301 coding   | noncoding | noncoding | noncoding |
| MSTRG.164047.1  | LOC105370056 | XLOC_163134 | 299 coding   | noncoding | noncoding | noncoding |
| MSTRG.164040.1  |              | XLOC_163135 | 276 coding   | noncoding | noncoding | noncoding |
| MSTRG.164143.1  | LINC00508    | XLOC_163187 | 242 coding   | noncoding | noncoding | noncoding |
| MSTRG.164151.1  |              | XLOC_163194 | 288 coding   | noncoding | noncoding | noncoding |
| MSTRG.164163.1  | TMEM132C     | XLOC_163199 | 242 coding   | noncoding | noncoding | noncoding |
| MSTRG.164165.1  | TMEM132C     | XLOC_163200 | 306 coding   | noncoding | noncoding | noncoding |
| NR_159493.1     | GLT1D1       | XLOC_163211 | 2929 coding  | coding    | coding    | coding    |
| MSTRG.164385.1  | TMEM132D     | XLOC_163229 | 272 coding   | noncoding | noncoding | noncoding |
| MSTRG.164386.1  | TMEM132D     | XLOC_163230 | 217 coding   | coding    | noncoding | noncoding |
| NM_007197.3     | FZD10        | XLOC_163240 | 3282 coding  | coding    | coding    | coding    |
| MSTRG.164330.1  | SFSWAP       | XLOC_163294 | 487 coding   | noncoding | noncoding | noncoding |
| MSTRG.164302.1  | MMP17        | XLOC_163301 | 240 coding   | noncoding | noncoding | noncoding |
| MSTRG.164304.1  |              | XLOC_163303 | 325 coding   | noncoding | noncoding | noncoding |
| MSTRG.164491.1  |              | XLOC_163350 | 297 coding   | noncoding | noncoding | noncoding |
| MSTRG.164502.1  |              | XLOC_163368 | 257 coding   | noncoding | noncoding | noncoding |
| MSTRG.164548.1  | ZNF84        | XLOC_163374 | 253 coding   | noncoding | noncoding | noncoding |
| NM_015394.5     | ZNF10        | XLOC_163387 | 4406 coding  | coding    | coding    | coding    |
| MSTRG.153414.1  | KDM5A        | XLOC_163419 | 263 coding   | noncoding | noncoding | noncoding |
| MSTRG.153365.1  |              | XLOC_163429 | 287 coding   | noncoding | noncoding | noncoding |
| MSTRG.153380.1  | B4GALNT3     | XLOC_163431 | 313 coding   | noncoding | noncoding | noncoding |
| MSTRG.153383.1  | B4GALNT3     | XLOC_163433 | 309 coding   | noncoding | noncoding | noncoding |
| MSTRG.153370.1  | LINC02455    | XLOC_163441 | 279 coding   | noncoding | noncoding | noncoding |
| MSTRG.153660.28 | WNK1         | XLOC_163445 | 7646 coding  | coding    | coding    | coding    |
| MSTRG.153660.24 | WNK1         | XLOC_163445 | 7364 coding  | coding    | coding    | coding    |
| MSTRG.153660.34 | RAD52        | XLOC_163445 | 9750 coding  | coding    | coding    | coding    |
| MSTRG.153660.40 | RAD52        | XLOC_163445 | 9474 coding  | coding    | coding    | coding    |
| MSTRG.153436.1  | WNT5B        | XLOC_163460 | 229 coding   | noncoding | noncoding | noncoding |

|                   |              |             |             |           |           |           |
|-------------------|--------------|-------------|-------------|-----------|-----------|-----------|
| MSTRG. 153468. 1  | CACNA1C      | XLOC_163468 | 279 coding  | noncoding | noncoding | noncoding |
| MSTRG. 153482. 1  |              | XLOC_163474 | 316 coding  | noncoding | noncoding | noncoding |
| MSTRG. 153530. 1  | ITFG2        | XLOC_163481 | 287 coding  | noncoding | noncoding | noncoding |
| MSTRG. 153454. 1  |              | XLOC_163487 | 303 coding  | noncoding | noncoding | noncoding |
| MSTRG. 153489. 1  | PRMT8        | XLOC_163497 | 274 coding  | noncoding | noncoding | noncoding |
| MSTRG. 153760. 1  | CRACR2A      | XLOC_163509 | 275 coding  | noncoding | noncoding | noncoding |
| MSTRG. 153767. 1  |              | XLOC_163515 | 243 coding  | noncoding | noncoding | noncoding |
| MSTRG. 153544. 1  |              | XLOC_163533 | 237 coding  | noncoding | noncoding | noncoding |
| MSTRG. 153568. 1  |              | XLOC_163545 | 295 coding  | noncoding | noncoding | noncoding |
| MSTRG. 153731. 1  | GALNT8       | XLOC_163596 | 292 coding  | noncoding | noncoding | noncoding |
| XR_001748966. 1   | LOC105369614 | XLOC_163602 | 2475 coding | noncoding | noncoding | noncoding |
| MSTRG. 153653. 1  | LOC105369617 | XLOC_163616 | 295 coding  | noncoding | noncoding | noncoding |
| XM_017019672. 2   | ANO2         | XLOC_163624 | 7377 coding | coding    | coding    | coding    |
| MSTRG. 153751. 1  | LOC105369623 | XLOC_163644 | 302 coding  | noncoding | noncoding | noncoding |
| MSTRG. 153746. 1  | LOC105369625 | XLOC_163650 | 265 coding  | noncoding | noncoding | noncoding |
| MSTRG. 153844. 1  |              | XLOC_163664 | 238 coding  | noncoding | noncoding | noncoding |
| MSTRG. 153881. 1  |              | XLOC_163686 | 349 coding  | noncoding | noncoding | noncoding |
| MSTRG. 153892. 1  |              | XLOC_163692 | 272 coding  | noncoding | noncoding | noncoding |
| MSTRG. 153901. 2  | CD4          | XLOC_163693 | 3053 coding | coding    | noncoding | noncoding |
| MSTRG. 153922. 1  | LOC105369632 | XLOC_163701 | 293 coding  | noncoding | noncoding | noncoding |
| MSTRG. 153928. 1  |              | XLOC_163704 | 231 coding  | noncoding | noncoding | noncoding |
| MSTRG. 153948. 1  |              | XLOC_163724 | 230 coding  | noncoding | noncoding | noncoding |
| MSTRG. 153970. 1  | CLSTN3       | XLOC_163733 | 1623 coding | coding    | coding    | coding    |
| MSTRG. 153959. 1  |              | XLOC_163738 | 260 coding  | noncoding | noncoding | noncoding |
| MSTRG. 153992. 1  |              | XLOC_163745 | 322 coding  | coding    | noncoding | noncoding |
| MSTRG. 154010. 1  | CLEC4C       | XLOC_163752 | 317 coding  | noncoding | noncoding | noncoding |
| MSTRG. 154030. 1  |              | XLOC_163760 | 323 coding  | noncoding | noncoding | noncoding |
| MSTRG. 154035. 1  |              | XLOC_163763 | 260 coding  | noncoding | noncoding | noncoding |
| MSTRG. 154011. 1  |              | XLOC_163764 | 301 coding  | noncoding | noncoding | noncoding |
| MSTRG. 154013. 1  |              | XLOC_163765 | 234 coding  | noncoding | noncoding | noncoding |
| MSTRG. 154084. 1  | LOC112268090 | XLOC_163800 | 226 coding  | noncoding | noncoding | noncoding |
| MSTRG. 154126. 1  |              | XLOC_163807 | 202 coding  | noncoding | noncoding | noncoding |
| NM_020661. 4      | AICDA        | XLOC_163843 | 2803 coding | coding    | coding    | coding    |
| MSTRG. 154165. 8  |              | XLOC_163849 | 2244 coding | noncoding | coding    | noncoding |
| MSTRG. 154192. 1  | A2ML1        | XLOC_163850 | 239 coding  | coding    | noncoding | noncoding |
| MSTRG. 154265. 1  |              | XLOC_163867 | 283 coding  | noncoding | noncoding | noncoding |
| MSTRG. 154286. 1  |              | XLOC_163881 | 337 coding  | noncoding | noncoding | noncoding |
| NM_002258. 3      | KLRB1        | XLOC_163885 | 1478 coding | coding    | noncoding | coding    |
| MSTRG. 154297. 21 |              | XLOC_163888 | 5218 coding | noncoding | noncoding | noncoding |
| MSTRG. 154341. 2  | CLEC12A-AS1  | XLOC_163911 | 2278 coding | coding    | noncoding | noncoding |
| MSTRG. 154422. 1  | KLRD1        | XLOC_163941 | 634 coding  | noncoding | noncoding | noncoding |
| MSTRG. 154431. 10 | KLRD1        | XLOC_163946 | 5782 coding | coding    | noncoding | noncoding |
| MSTRG. 154471. 1  |              | XLOC_163985 | 239 coding  | coding    | noncoding | noncoding |

|                  |              |             |              |           |           |           |
|------------------|--------------|-------------|--------------|-----------|-----------|-----------|
| MSTRG. 154541. 1 |              | XLOC_164041 | 253 coding   | noncoding | noncoding | noncoding |
| MSTRG. 154544. 1 | BCL2L14      | XLOC_164042 | 265 coding   | noncoding | noncoding | noncoding |
| MSTRG. 154708. 1 | GPRC5A       | XLOC_164057 | 238 coding   | noncoding | noncoding | noncoding |
| MSTRG. 154777. 1 |              | XLOC_164090 | 576 coding   | noncoding | noncoding | noncoding |
| XM_011520628. 2  | GRIN2B       | XLOC_164097 | 30873 coding | coding    | coding    | coding    |
| MSTRG. 154814. 1 | GRIN2B       | XLOC_164099 | 362 coding   | noncoding | noncoding | noncoding |
| MSTRG. 154819. 1 | GRIN2B       | XLOC_164102 | 317 coding   | noncoding | noncoding | noncoding |
| MSTRG. 154798. 1 |              | XLOC_164107 | 206 coding   | noncoding | noncoding | noncoding |
| MSTRG. 154837. 1 |              | XLOC_164116 | 269 coding   | noncoding | noncoding | noncoding |
| MSTRG. 154838. 1 |              | XLOC_164117 | 258 coding   | noncoding | noncoding | noncoding |
| MSTRG. 154841. 1 |              | XLOC_164118 | 228 coding   | noncoding | noncoding | noncoding |
| MSTRG. 154981. 2 | PLBD1        | XLOC_164119 | 12819 coding | coding    | coding    | coding    |
| MSTRG. 154845. 1 |              | XLOC_164160 | 289 coding   | noncoding | noncoding | noncoding |
| NM_001190839. 3  | MGP          | XLOC_164163 | 1725 coding  | noncoding | coding    | noncoding |
| MSTRG. 154937. 1 | EPS8         | XLOC_164202 | 241 coding   | noncoding | noncoding | noncoding |
| MSTRG. 155073. 1 |              | XLOC_164241 | 263 coding   | noncoding | noncoding | noncoding |
| MSTRG. 155110. 1 |              | XLOC_164249 | 304 coding   | coding    | noncoding | noncoding |
| MSTRG. 155116. 1 |              | XLOC_164253 | 317 coding   | noncoding | noncoding | noncoding |
| MSTRG. 155126. 1 |              | XLOC_164258 | 277 coding   | noncoding | noncoding | noncoding |
| MSTRG. 155154. 1 | PIK3C2G      | XLOC_164260 | 291 coding   | noncoding | noncoding | noncoding |
| XM_024449253. 1  | PLCZ1        | XLOC_164269 | 7578 coding  | coding    | coding    | coding    |
| MSTRG. 155133. 1 |              | XLOC_164275 | 392 coding   | noncoding | noncoding | noncoding |
| MSTRG. 155139. 1 |              | XLOC_164279 | 251 coding   | noncoding | noncoding | noncoding |
| MSTRG. 155143. 1 | LOC107984527 | XLOC_164281 | 479 coding   | coding    | noncoding | noncoding |
| MSTRG. 155144. 1 | LOC107984527 | XLOC_164282 | 280 coding   | noncoding | noncoding | noncoding |
| MSTRG. 155182. 1 |              | XLOC_164288 | 270 coding   | noncoding | noncoding | noncoding |
| MSTRG. 155278. 1 | SLCO1C1      | XLOC_164384 | 315 coding   | coding    | noncoding | noncoding |
| MSTRG. 155245. 1 |              | XLOC_164385 | 250 coding   | noncoding | noncoding | noncoding |
| MSTRG. 155251. 1 | SLCO1B7      | XLOC_164387 | 345 coding   | noncoding | noncoding | noncoding |
| MSTRG. 155254. 1 | SLCO1B1      | XLOC_164388 | 296 coding   | noncoding | noncoding | noncoding |
| NM_134431. 3     | SLCO1A2      | XLOC_164389 | 7682 coding  | coding    | noncoding | coding    |
| XM_006719025. 4  | ABCC9        | XLOC_164399 | 9242 coding  | coding    | coding    | coding    |
| MSTRG. 155417. 1 | ST8SIA1      | XLOC_164412 | 204 coding   | noncoding | noncoding | noncoding |
| MSTRG. 155473. 1 |              | XLOC_164459 | 312 coding   | noncoding | noncoding | noncoding |
| MSTRG. 155501. 1 |              | XLOC_164461 | 272 coding   | coding    | noncoding | noncoding |
| MSTRG. 155574. 1 | SOX5         | XLOC_164468 | 250 coding   | noncoding | noncoding | noncoding |
| MSTRG. 155609. 1 | SOX5         | XLOC_164478 | 322 coding   | noncoding | noncoding | noncoding |
| XR_001749046. 1  | LOC105369698 | XLOC_164491 | 2781 coding  | noncoding | coding    | noncoding |
| MSTRG. 155531. 1 | LOC105369698 | XLOC_164495 | 313 coding   | noncoding | noncoding | noncoding |
| MSTRG. 155534. 1 | LOC105369698 | XLOC_164496 | 239 coding   | noncoding | noncoding | noncoding |
| MSTRG. 155539. 1 | LOC107984475 | XLOC_164502 | 290 coding   | noncoding | noncoding | noncoding |
| MSTRG. 155694. 1 | LOC645177    | XLOC_164504 | 222 coding   | noncoding | noncoding | noncoding |
| MSTRG. 155660. 1 |              | XLOC_164513 | 229 coding   | noncoding | noncoding | noncoding |

|                |              |             |             |           |           |           |
|----------------|--------------|-------------|-------------|-----------|-----------|-----------|
| MSTRG.155887.1 | SSPN         | XLOC_164542 | 255 coding  | coding    | coding    | noncoding |
| MSTRG.155909.1 | ITPR2        | XLOC_164558 | 275 coding  | noncoding | noncoding | noncoding |
| MSTRG.155855.1 | LOC105369711 | XLOC_164708 | 257 coding  | noncoding | noncoding | noncoding |
| MSTRG.155859.1 |              | XLOC_164714 | 250 coding  | noncoding | noncoding | noncoding |
| MSTRG.156201.3 | FAR2         | XLOC_164718 | 811 coding  | noncoding | noncoding | noncoding |
| MSTRG.156075.1 | TMTC1        | XLOC_164760 | 256 coding  | noncoding | noncoding | noncoding |
| MSTRG.156091.1 | TMTC1        | XLOC_164764 | 243 coding  | noncoding | noncoding | noncoding |
| MSTRG.156048.1 |              | XLOC_164777 | 241 coding  | noncoding | noncoding | noncoding |
| MSTRG.156052.1 |              | XLOC_164779 | 216 coding  | noncoding | noncoding | noncoding |
| MSTRG.156117.1 |              | XLOC_164799 | 441 coding  | noncoding | noncoding | noncoding |
| MSTRG.156263.1 | CAPRIN2      | XLOC_164800 | 451 coding  | noncoding | noncoding | noncoding |
| NM_032156.4    | CAPRIN2      | XLOC_164801 | 4526 coding | coding    | coding    | coding    |
| XM_006719147.3 | CAPRIN2      | XLOC_164801 | 4589 coding | coding    | coding    | coding    |
| MSTRG.156279.1 | DDX11-AS1    | XLOC_164812 | 302 coding  | coding    | noncoding | noncoding |
| NR_153414.1    | OVOS2        | XLOC_164822 | 5725 coding | coding    | coding    | coding    |
| MSTRG.156293.1 |              | XLOC_164826 | 224 coding  | noncoding | noncoding | noncoding |
| MSTRG.156276.1 |              | XLOC_164829 | 314 coding  | noncoding | noncoding | noncoding |
| MSTRG.156299.1 | DENND5B      | XLOC_164832 | 240 coding  | noncoding | noncoding | noncoding |
| MSTRG.156308.1 | DENND5B      | XLOC_164836 | 335 coding  | noncoding | noncoding | noncoding |
| MSTRG.156361.1 | LOC102724618 | XLOC_164858 | 870 coding  | noncoding | noncoding | noncoding |
| MSTRG.156365.1 | LOC102724618 | XLOC_164861 | 945 coding  | noncoding | noncoding | noncoding |
| MSTRG.156372.1 | LOC102724618 | XLOC_164866 | 289 coding  | noncoding | noncoding | noncoding |
| MSTRG.156351.1 |              | XLOC_164883 | 289 coding  | noncoding | noncoding | noncoding |
| MSTRG.156376.1 |              | XLOC_164890 | 320 coding  | noncoding | noncoding | noncoding |
| MSTRG.156441.1 |              | XLOC_164902 | 346 coding  | coding    | noncoding | noncoding |
| MSTRG.156457.1 |              | XLOC_164909 | 349 coding  | coding    | noncoding | noncoding |
| MSTRG.156466.1 |              | XLOC_164917 | 234 coding  | coding    | noncoding | noncoding |
| MSTRG.156538.1 |              | XLOC_164949 | 265 coding  | coding    | noncoding | noncoding |
| MSTRG.156546.1 |              | XLOC_164959 | 296 coding  | noncoding | noncoding | noncoding |
| MSTRG.156587.1 | CPNE8        | XLOC_164966 | 289 coding  | noncoding | noncoding | noncoding |
| MSTRG.156566.1 |              | XLOC_164974 | 262 coding  | noncoding | noncoding | noncoding |
| MSTRG.156598.1 |              | XLOC_164990 | 310 coding  | noncoding | noncoding | noncoding |
| MSTRG.156668.1 | CNTN1        | XLOC_165045 | 283 coding  | noncoding | noncoding | noncoding |
| MSTRG.156635.1 |              | XLOC_165057 | 265 coding  | noncoding | noncoding | noncoding |
| MSTRG.156638.1 |              | XLOC_165069 | 308 coding  | noncoding | noncoding | noncoding |
| MSTRG.156831.1 | PRICKLE1     | XLOC_165108 | 319 coding  | noncoding | noncoding | noncoding |
| MSTRG.156809.1 |              | XLOC_165113 | 259 coding  | noncoding | noncoding | noncoding |
| MSTRG.156860.1 | ADAMTS20     | XLOC_165124 | 252 coding  | noncoding | noncoding | noncoding |
| MSTRG.156852.1 |              | XLOC_165126 | 290 coding  | noncoding | coding    | noncoding |
| MSTRG.156990.1 | NELL2        | XLOC_165287 | 263 coding  | noncoding | noncoding | noncoding |
| MSTRG.156910.1 |              | XLOC_165306 | 482 coding  | noncoding | noncoding | noncoding |
| MSTRG.156943.5 | ANO6         | XLOC_165310 | 1409 coding | coding    | noncoding | noncoding |
| XM_011538984.2 | SCAF11       | XLOC_165329 | 9115 coding | coding    | coding    | coding    |

|                   |              |             |             |           |           |           |
|-------------------|--------------|-------------|-------------|-----------|-----------|-----------|
| MSTRG. 157009. 1  |              | XLOC_165347 | 342 coding  | noncoding | noncoding | noncoding |
| MSTRG. 157041. 1  | SLC38A1      | XLOC_165362 | 245 coding  | noncoding | noncoding | noncoding |
| MSTRG. 157025. 1  |              | XLOC_165374 | 232 coding  | noncoding | noncoding | noncoding |
| MSTRG. 157028. 1  |              | XLOC_165375 | 309 coding  | noncoding | noncoding | noncoding |
| MSTRG. 157392. 15 | PCED1B       | XLOC_165506 | 1747 coding | noncoding | coding    | coding    |
| MSTRG. 157392. 20 | PCED1B       | XLOC_165506 | 1822 coding | noncoding | coding    | coding    |
| MSTRG. 157344. 1  |              | XLOC_165525 | 472 coding  | noncoding | noncoding | noncoding |
| MSTRG. 157350. 1  |              | XLOC_165528 | 257 coding  | noncoding | noncoding | noncoding |
| MSTRG. 157375. 1  | LINC02354    | XLOC_165552 | 211 coding  | noncoding | noncoding | noncoding |
| MSTRG. 157437. 1  |              | XLOC_165572 | 538 coding  | noncoding | noncoding | noncoding |
| MSTRG. 157438. 1  |              | XLOC_165573 | 258 coding  | noncoding | noncoding | noncoding |
| MSTRG. 157505. 1  |              | XLOC_165616 | 218 coding  | noncoding | noncoding | noncoding |
| MSTRG. 157507. 1  |              | XLOC_165618 | 240 coding  | noncoding | noncoding | noncoding |
| MSTRG. 157512. 1  |              | XLOC_165620 | 240 coding  | noncoding | noncoding | noncoding |
| MSTRG. 157514. 1  |              | XLOC_165621 | 289 coding  | noncoding | noncoding | noncoding |
| MSTRG. 157530. 1  |              | XLOC_165638 | 385 coding  | noncoding | noncoding | noncoding |
| MSTRG. 157535. 1  |              | XLOC_165640 | 247 coding  | noncoding | noncoding | noncoding |
| MSTRG. 157546. 1  | CCDC65       | XLOC_165641 | 252 coding  | noncoding | noncoding | noncoding |
| MSTRG. 157548. 1  | CCDC65       | XLOC_165642 | 237 coding  | noncoding | noncoding | noncoding |
| MSTRG. 157555. 1  |              | XLOC_165649 | 301 coding  | noncoding | noncoding | noncoding |
| XM_017019630. 2   | LMBR1L       | XLOC_165657 | 4694 coding | coding    | coding    | coding    |
| MSTRG. 157570. 1  |              | XLOC_165658 | 211 coding  | noncoding | noncoding | noncoding |
| MSTRG. 157785. 1  | LOC105369760 | XLOC_165660 | 215 coding  | noncoding | noncoding | noncoding |
| MSTRG. 157791. 8  | TUBA1C       | XLOC_165666 | 1624 coding | coding    | coding    | coding    |
| MSTRG. 157769. 1  | SPATS2       | XLOC_165687 | 232 coding  | noncoding | noncoding | noncoding |
| MSTRG. 157853. 1  | AQP6         | XLOC_165734 | 286 coding  | coding    | noncoding | noncoding |
| MSTRG. 157899. 1  | LIMA1        | XLOC_165758 | 413 coding  | noncoding | noncoding | noncoding |
| MSTRG. 157876. 1  | FAM186A      | XLOC_165767 | 228 coding  | noncoding | noncoding | noncoding |
| MSTRG. 157911. 1  | TMPRSS12     | XLOC_165776 | 279 coding  | noncoding | noncoding | noncoding |
| MSTRG. 157939. 1  | SLC11A2      | XLOC_165783 | 290 coding  | noncoding | noncoding | noncoding |
| MSTRG. 157926. 1  |              | XLOC_165786 | 279 coding  | noncoding | noncoding | noncoding |
| MSTRG. 157980. 1  | CSRNP2       | XLOC_165789 | 287 coding  | noncoding | noncoding | noncoding |
| NM_001351088. 2   | POU6F1       | XLOC_165792 | 3201 coding | noncoding | coding    | noncoding |
| MSTRG. 158049. 1  | GALNT6       | XLOC_165800 | 228 coding  | noncoding | noncoding | noncoding |
| MSTRG. 158064. 1  | SLC4A8       | XLOC_165813 | 290 coding  | noncoding | noncoding | noncoding |
| MSTRG. 158066. 1  | SLC4A8       | XLOC_165815 | 349 coding  | noncoding | noncoding | noncoding |
| MSTRG. 158012. 1  |              | XLOC_165847 | 322 coding  | noncoding | noncoding | noncoding |
| MSTRG. 158011. 1  |              | XLOC_165848 | 377 coding  | noncoding | noncoding | noncoding |
| MSTRG. 158013. 1  |              | XLOC_165849 | 291 coding  | noncoding | noncoding | noncoding |
| NM_002281. 4      | KRT81        | XLOC_165881 | 1929 coding | coding    | coding    | coding    |
| MSTRG. 158118. 1  |              | XLOC_165885 | 258 coding  | coding    | noncoding | noncoding |
| MSTRG. 158122. 1  |              | XLOC_165888 | 213 coding  | noncoding | noncoding | noncoding |
| MSTRG. 158132. 1  | KRT6C        | XLOC_165895 | 272 coding  | noncoding | noncoding | noncoding |

|                   |              |             |             |           |           |           |
|-------------------|--------------|-------------|-------------|-----------|-----------|-----------|
| MSTRG. 158133. 1  |              | XLOC_165897 | 212 coding  | noncoding | noncoding | noncoding |
| XM_011538257. 2   | KRT73        | XLOC_165906 | 5890 coding | coding    | coding    | coding    |
| MSTRG. 158149. 1  |              | XLOC_165916 | 237 coding  | noncoding | noncoding | noncoding |
| MSTRG. 158176. 1  |              | XLOC_165931 | 263 coding  | noncoding | noncoding | noncoding |
| MSTRG. 158192. 1  | SPRYD3       | XLOC_165936 | 249 coding  | noncoding | noncoding | noncoding |
| MSTRG. 158186. 1  |              | XLOC_165938 | 278 coding  | noncoding | noncoding | noncoding |
| MSTRG. 158288. 2  | TARBP2       | XLOC_165955 | 317 coding  | coding    | noncoding | noncoding |
| MSTRG. 158293. 1  | ATF7-NPFF    | XLOC_165958 | 257 coding  | noncoding | noncoding | noncoding |
| MSTRG. 158299. 1  | ATF7-NPFF    | XLOC_165964 | 250 coding  | noncoding | noncoding | noncoding |
| MSTRG. 158270. 1  | FLJ12825     | XLOC_165992 | 269 coding  | noncoding | noncoding | noncoding |
| MSTRG. 158310. 1  | NFE2         | XLOC_165998 | 337 coding  | noncoding | noncoding | noncoding |
| MSTRG. 158312. 7  | COPZ1        | XLOC_166000 | 2156 coding | coding    | coding    | noncoding |
| MSTRG. 158312. 10 | COPZ1        | XLOC_166000 | 2136 coding | coding    | coding    | coding    |
| MSTRG. 158333. 1  | LOC102724050 | XLOC_166007 | 297 coding  | noncoding | noncoding | noncoding |
| MSTRG. 158335. 1  | LOC102724050 | XLOC_166009 | 316 coding  | noncoding | coding    | noncoding |
| MSTRG. 158317. 1  |              | XLOC_166011 | 302 coding  | noncoding | noncoding | noncoding |
| MSTRG. 158338. 1  |              | XLOC_166031 | 282 coding  | noncoding | noncoding | noncoding |
| MSTRG. 158346. 1  |              | XLOC_166033 | 222 coding  | noncoding | noncoding | noncoding |
| MSTRG. 158386. 1  |              | XLOC_166051 | 264 coding  | noncoding | noncoding | noncoding |
| MSTRG. 158390. 1  |              | XLOC_166054 | 219 coding  | noncoding | noncoding | noncoding |
| MSTRG. 158392. 1  |              | XLOC_166055 | 248 coding  | noncoding | noncoding | noncoding |
| MSTRG. 158402. 1  |              | XLOC_166059 | 267 coding  | noncoding | noncoding | noncoding |
| MSTRG. 158408. 1  |              | XLOC_166060 | 230 coding  | noncoding | noncoding | noncoding |
| MSTRG. 158458. 1  | SARNP        | XLOC_166080 | 267 coding  | noncoding | noncoding | noncoding |
| MSTRG. 158441. 1  |              | XLOC_166083 | 260 coding  | noncoding | noncoding | noncoding |
| MSTRG. 158439. 1  |              | XLOC_166084 | 264 coding  | noncoding | noncoding | noncoding |
| MSTRG. 158463. 1  |              | XLOC_166094 | 202 coding  | noncoding | noncoding | noncoding |
| MSTRG. 158494. 4  | RPL41        | XLOC_166101 | 507 coding  | noncoding | noncoding | noncoding |
| XM_011538197. 2   | ANKRD52      | XLOC_166110 | 6730 coding | coding    | coding    | coding    |
| MSTRG. 158534. 7  | PAN2         | XLOC_166117 | 284 coding  | noncoding | noncoding | noncoding |
| MSTRG. 158541. 1  |              | XLOC_166123 | 238 coding  | noncoding | noncoding | noncoding |
| MSTRG. 158540. 1  |              | XLOC_166124 | 290 coding  | noncoding | noncoding | noncoding |
| MSTRG. 158544. 1  |              | XLOC_166127 | 237 coding  | noncoding | noncoding | noncoding |
| MSTRG. 158595. 1  | RBMS2        | XLOC_166131 | 254 coding  | noncoding | noncoding | noncoding |
| MSTRG. 158596. 1  | RBMS2        | XLOC_166132 | 307 coding  | noncoding | noncoding | noncoding |
| XM_017018740. 1   | BAZ2A        | XLOC_166138 | 6737 coding | coding    | coding    | coding    |
| MSTRG. 158602. 13 | BAZ2A        | XLOC_166138 | 321 coding  | noncoding | noncoding | noncoding |
| MSTRG. 158603. 1  | BAZ2A        | XLOC_166139 | 214 coding  | noncoding | noncoding | noncoding |
| MSTRG. 158559. 1  |              | XLOC_166143 | 462 coding  | noncoding | noncoding | noncoding |
| XM_011537773. 2   | PTGES3       | XLOC_166144 | 1497 coding | coding    | coding    | coding    |
| MSTRG. 158566. 1  |              | XLOC_166148 | 534 coding  | noncoding | noncoding | noncoding |
| NM_001256041. 2   | MYO1A        | XLOC_166159 | 4091 coding | coding    | coding    | coding    |
| MSTRG. 158621. 1  | NEMP1        | XLOC_166162 | 252 coding  | noncoding | noncoding | noncoding |

|                |              |             |             |           |           |           |
|----------------|--------------|-------------|-------------|-----------|-----------|-----------|
| MSTRG.158681.1 | GLI1         | XLOC_166187 | 308 coding  | noncoding | noncoding | noncoding |
| XM_011538657.2 | ARHGAP9      | XLOC_166188 | 2490 coding | coding    | coding    | coding    |
| MSTRG.158641.1 | KIF5A        | XLOC_166192 | 308 coding  | noncoding | noncoding | noncoding |
| MSTRG.158678.1 |              | XLOC_166201 | 231 coding  | noncoding | noncoding | noncoding |
| MSTRG.158677.1 |              | XLOC_166202 | 286 coding  | noncoding | noncoding | noncoding |
| MSTRG.158701.1 |              | XLOC_166225 | 298 coding  | noncoding | noncoding | noncoding |
| MSTRG.158713.1 |              | XLOC_166233 | 322 coding  | noncoding | noncoding | noncoding |
| MSTRG.158723.1 | LINC02388    | XLOC_166239 | 249 coding  | noncoding | noncoding | noncoding |
| MSTRG.158726.1 | LOC100506869 | XLOC_166240 | 285 coding  | noncoding | noncoding | noncoding |
| NM_153377.4    | LRIG3        | XLOC_166245 | 4080 coding | coding    | coding    | coding    |
| MSTRG.158756.1 |              | XLOC_166255 | 351 coding  | noncoding | noncoding | noncoding |
| MSTRG.158867.3 | SLC16A7      | XLOC_166259 | 541 coding  | noncoding | noncoding | noncoding |
| MSTRG.158803.1 |              | XLOC_166271 | 299 coding  | noncoding | noncoding | noncoding |
| MSTRG.158831.1 |              | XLOC_166285 | 296 coding  | noncoding | noncoding | noncoding |
| MSTRG.158838.1 |              | XLOC_166288 | 298 coding  | noncoding | noncoding | noncoding |
| MSTRG.158845.1 |              | XLOC_166292 | 425 coding  | coding    | noncoding | noncoding |
| MSTRG.158846.1 |              | XLOC_166293 | 255 coding  | coding    | noncoding | noncoding |
| MSTRG.158850.1 |              | XLOC_166296 | 267 coding  | noncoding | noncoding | noncoding |
| MSTRG.158856.1 |              | XLOC_166300 | 254 coding  | noncoding | noncoding | noncoding |
| MSTRG.158857.1 |              | XLOC_166301 | 202 coding  | noncoding | noncoding | noncoding |
| MSTRG.158861.1 |              | XLOC_166303 | 249 coding  | coding    | noncoding | noncoding |
| MSTRG.158906.1 |              | XLOC_166324 | 233 coding  | noncoding | noncoding | noncoding |
| MSTRG.158919.1 |              | XLOC_166328 | 401 coding  | coding    | noncoding | noncoding |
| MSTRG.158924.1 |              | XLOC_166331 | 268 coding  | noncoding | noncoding | noncoding |
| MSTRG.158930.1 |              | XLOC_166333 | 269 coding  | noncoding | noncoding | noncoding |
| MSTRG.158931.1 |              | XLOC_166334 | 289 coding  | noncoding | noncoding | noncoding |
| MSTRG.159066.1 |              | XLOC_166365 | 284 coding  | noncoding | noncoding | noncoding |
| MSTRG.159067.1 | C12orf56     | XLOC_166366 | 256 coding  | noncoding | noncoding | noncoding |
| MSTRG.159075.1 | C12orf56     | XLOC_166369 | 301 coding  | noncoding | noncoding | noncoding |
| MSTRG.159070.1 |              | XLOC_166372 | 261 coding  | noncoding | noncoding | noncoding |
| NR_158985.1    | HMGA2-AS1    | XLOC_166422 | 1185 coding | noncoding | coding    | coding    |
| MSTRG.159177.1 |              | XLOC_166427 | 298 coding  | noncoding | noncoding | noncoding |
| MSTRG.159392.1 | GRIP1        | XLOC_166453 | 209 coding  | noncoding | noncoding | noncoding |
| MSTRG.159414.1 | GRIP1        | XLOC_166457 | 301 coding  | noncoding | noncoding | noncoding |
| MSTRG.159418.1 | GRIP1        | XLOC_166459 | 311 coding  | noncoding | noncoding | noncoding |
| MSTRG.159276.1 |              | XLOC_166467 | 254 coding  | noncoding | noncoding | noncoding |
| MSTRG.159285.1 |              | XLOC_166474 | 334 coding  | noncoding | noncoding | noncoding |
| MSTRG.159559.1 | LOC105369818 | XLOC_166524 | 239 coding  | noncoding | noncoding | noncoding |
| NM_001354969.1 | MDM1         | XLOC_166525 | 3032 coding | coding    | coding    | coding    |
| MSTRG.159608.1 | CPM          | XLOC_166566 | 287 coding  | noncoding | noncoding | noncoding |
| MSTRG.159534.1 |              | XLOC_166568 | 300 coding  | noncoding | noncoding | noncoding |
| MSTRG.159542.1 |              | XLOC_166572 | 277 coding  | noncoding | noncoding | noncoding |
| MSTRG.159545.1 |              | XLOC_166573 | 243 coding  | noncoding | noncoding | noncoding |

|                  |              |             |            |           |           |           |
|------------------|--------------|-------------|------------|-----------|-----------|-----------|
| MSTRG. 159546. 1 |              | XLOC_166574 | 289 coding | noncoding | noncoding | noncoding |
| MSTRG. 159724. 1 |              | XLOC_166615 | 211 coding | noncoding | noncoding | noncoding |
| MSTRG. 159727. 1 |              | XLOC_166616 | 285 coding | noncoding | noncoding | noncoding |
| MSTRG. 159815. 1 | PTPRR        | XLOC_166652 | 284 coding | noncoding | noncoding | noncoding |
| MSTRG. 159818. 1 | PTPRR        | XLOC_166654 | 224 coding | noncoding | noncoding | noncoding |
| MSTRG. 159836. 1 |              | XLOC_166674 | 297 coding | noncoding | noncoding | noncoding |
| MSTRG. 159838. 1 |              | XLOC_166675 | 480 coding | noncoding | noncoding | noncoding |
| MSTRG. 159881. 1 | LGR5         | XLOC_166688 | 217 coding | noncoding | noncoding | noncoding |
| MSTRG. 159890. 1 |              | XLOC_166710 | 284 coding | noncoding | noncoding | noncoding |
| MSTRG. 159928. 1 |              | XLOC_166722 | 388 coding | noncoding | noncoding | coding    |
| MSTRG. 159975. 1 | TRHDE        | XLOC_166723 | 291 coding | noncoding | noncoding | noncoding |
| MSTRG. 159977. 1 | TRHDE        | XLOC_166724 | 212 coding | coding    | noncoding | noncoding |
| MSTRG. 159996. 1 | TRHDE        | XLOC_166735 | 241 coding | noncoding | noncoding | noncoding |
| MSTRG. 159971. 1 |              | XLOC_166749 | 239 coding | noncoding | noncoding | noncoding |
| MSTRG. 160006. 1 | LINC02444    | XLOC_166752 | 225 coding | noncoding | noncoding | noncoding |
| MSTRG. 160018. 1 |              | XLOC_166758 | 292 coding | noncoding | noncoding | noncoding |
| MSTRG. 160030. 1 |              | XLOC_166764 | 212 coding | noncoding | noncoding | noncoding |
| MSTRG. 160046. 1 | LOC100507377 | XLOC_166767 | 292 coding | noncoding | noncoding | noncoding |
| MSTRG. 160062. 1 |              | XLOC_166786 | 296 coding | noncoding | noncoding | noncoding |
| MSTRG. 160108. 1 | GLIPR1L1     | XLOC_166805 | 288 coding | noncoding | noncoding | noncoding |
| MSTRG. 160116. 1 | GLIPR1L1     | XLOC_166806 | 269 coding | noncoding | noncoding | noncoding |
| MSTRG. 160147. 1 | LOC105369844 | XLOC_166825 | 230 coding | noncoding | noncoding | noncoding |
| MSTRG. 160164. 1 |              | XLOC_166844 | 312 coding | noncoding | noncoding | noncoding |
| MSTRG. 160165. 1 |              | XLOC_166847 | 293 coding | noncoding | noncoding | noncoding |
| MSTRG. 160201. 1 |              | XLOC_166915 | 259 coding | noncoding | noncoding | noncoding |
| MSTRG. 160208. 1 |              | XLOC_166919 | 263 coding | noncoding | noncoding | noncoding |
| MSTRG. 160212. 1 |              | XLOC_166922 | 213 coding | noncoding | noncoding | noncoding |
| MSTRG. 160283. 1 |              | XLOC_166927 | 325 coding | noncoding | noncoding | noncoding |
| MSTRG. 160358. 1 | NAV3         | XLOC_166934 | 320 coding | noncoding | noncoding | noncoding |
| MSTRG. 160403. 1 | SYT1         | XLOC_166970 | 200 coding | noncoding | noncoding | noncoding |
| MSTRG. 160462. 1 | OTOGL        | XLOC_166994 | 303 coding | noncoding | noncoding | noncoding |
| MSTRG. 160464. 1 | OTOGL        | XLOC_166995 | 317 coding | noncoding | noncoding | noncoding |
| MSTRG. 160655. 1 | PPFIA2       | XLOC_167033 | 203 coding | noncoding | noncoding | noncoding |
| MSTRG. 160661. 1 | PPFIA2       | XLOC_167037 | 241 coding | noncoding | noncoding | noncoding |
| MSTRG. 160662. 1 | PPFIA2       | XLOC_167038 | 337 coding | noncoding | noncoding | noncoding |
| MSTRG. 160500. 1 |              | XLOC_167040 | 259 coding | noncoding | noncoding | noncoding |
| MSTRG. 160508. 1 |              | XLOC_167045 | 294 coding | noncoding | noncoding | noncoding |
| MSTRG. 160526. 1 |              | XLOC_167056 | 253 coding | noncoding | noncoding | noncoding |
| MSTRG. 160536. 1 |              | XLOC_167059 | 471 coding | noncoding | noncoding | noncoding |
| MSTRG. 160560. 1 |              | XLOC_167067 | 269 coding | noncoding | noncoding | noncoding |
| MSTRG. 160573. 1 | LOC107984536 | XLOC_167072 | 289 coding | noncoding | noncoding | noncoding |
| MSTRG. 160588. 1 |              | XLOC_167080 | 221 coding | noncoding | noncoding | noncoding |
| MSTRG. 160611. 1 | LOC102724680 | XLOC_167089 | 306 coding | noncoding | noncoding | noncoding |

|                |              |             |              |           |           |           |
|----------------|--------------|-------------|--------------|-----------|-----------|-----------|
| MSTRG.160614.1 |              | XLOC_167098 | 229 coding   | noncoding | noncoding | noncoding |
| MSTRG.160695.1 |              | XLOC_167114 | 234 coding   | noncoding | noncoding | noncoding |
| NM_001351291.2 | MGAT4C       | XLOC_167123 | 26388 coding | coding    | coding    | coding    |
| MSTRG.160747.1 | MGAT4C       | XLOC_167125 | 263 coding   | noncoding | noncoding | noncoding |
| MSTRG.160759.1 | MGAT4C       | XLOC_167129 | 286 coding   | noncoding | noncoding | noncoding |
| MSTRG.160704.1 |              | XLOC_167140 | 236 coding   | noncoding | noncoding | noncoding |
| MSTRG.160805.1 |              | XLOC_167173 | 765 coding   | noncoding | noncoding | noncoding |
| MSTRG.160812.1 |              | XLOC_167177 | 293 coding   | noncoding | noncoding | noncoding |
| MSTRG.160813.1 |              | XLOC_167178 | 309 coding   | noncoding | noncoding | noncoding |
| MSTRG.161251.1 |              | XLOC_167199 | 237 coding   | noncoding | noncoding | noncoding |
| MSTRG.161276.1 |              | XLOC_167222 | 261 coding   | noncoding | noncoding | noncoding |
| NR_037660.1    | POC1B        | XLOC_167223 | 3048 coding  | coding    | coding    | coding    |
| XM_024448993.1 | ATP2B1       | XLOC_167241 | 7106 coding  | coding    | coding    | coding    |
| MSTRG.161310.1 | LOC107984543 | XLOC_167245 | 356 coding   | noncoding | noncoding | noncoding |
| MSTRG.160923.1 | LOC105369895 | XLOC_167279 | 226 coding   | coding    | noncoding | noncoding |
| NM_152638.4    | CCER1        | XLOC_167280 | 2962 coding  | coding    | coding    | coding    |
| MSTRG.160930.1 |              | XLOC_167282 | 379 coding   | noncoding | noncoding | noncoding |
| MSTRG.160956.1 | LOC105369898 | XLOC_167294 | 221 coding   | noncoding | noncoding | noncoding |
| MSTRG.160959.1 | LOC105369898 | XLOC_167295 | 204 coding   | noncoding | noncoding | noncoding |
| MSTRG.160960.1 | LOC105369898 | XLOC_167296 | 227 coding   | noncoding | noncoding | noncoding |
| MSTRG.160984.1 |              | XLOC_167312 | 286 coding   | noncoding | noncoding | noncoding |
| MSTRG.161073.1 | LINC01619    | XLOC_167327 | 250 coding   | noncoding | noncoding | noncoding |
| MSTRG.161006.1 | LOC107984467 | XLOC_167348 | 253 coding   | noncoding | noncoding | noncoding |
| MSTRG.161123.1 | EEA1         | XLOC_167376 | 403 coding   | noncoding | noncoding | noncoding |
| MSTRG.161125.1 | EEA1         | XLOC_167378 | 305 coding   | coding    | noncoding | noncoding |
| MSTRG.161152.1 | LOC643339    | XLOC_167394 | 256 coding   | noncoding | noncoding | noncoding |
| MSTRG.161176.1 | LOC643339    | XLOC_167400 | 311 coding   | noncoding | noncoding | noncoding |
| MSTRG.161204.1 | SOCS2        | XLOC_167416 | 227 coding   | noncoding | noncoding | noncoding |
| MSTRG.161316.5 | CRADD        | XLOC_167421 | 487 coding   | coding    | noncoding | noncoding |
| MSTRG.161570.1 | LOC102724960 | XLOC_167456 | 208 coding   | noncoding | noncoding | noncoding |
| MSTRG.161384.1 |              | XLOC_167479 | 218 coding   | noncoding | noncoding | noncoding |
| MSTRG.161396.1 | NDUFA12      | XLOC_167482 | 282 coding   | noncoding | noncoding | noncoding |
| XR_001749267.1 | LOC107984545 | XLOC_167494 | 2092 coding  | noncoding | noncoding | noncoding |
| MSTRG.161496.1 | USP44        | XLOC_167502 | 415 coding   | noncoding | noncoding | noncoding |
| MSTRG.161492.1 |              | XLOC_167505 | 239 coding   | noncoding | noncoding | noncoding |
| MSTRG.161525.1 |              | XLOC_167507 | 202 coding   | noncoding | noncoding | noncoding |
| MSTRG.161509.1 |              | XLOC_167508 | 307 coding   | noncoding | noncoding | noncoding |
| MSTRG.161531.1 | LINC02410    | XLOC_167518 | 246 coding   | noncoding | noncoding | noncoding |
| MSTRG.161538.1 | CCDC38       | XLOC_167524 | 217 coding   | noncoding | noncoding | noncoding |
| MSTRG.161575.1 |              | XLOC_167537 | 309 coding   | noncoding | noncoding | noncoding |
| MSTRG.161711.1 |              | XLOC_167559 | 227 coding   | noncoding | noncoding | noncoding |
| MSTRG.161712.1 |              | XLOC_167560 | 257 coding   | noncoding | noncoding | noncoding |
| MSTRG.161615.1 | CFAP54       | XLOC_167574 | 358 coding   | noncoding | noncoding | noncoding |

|                   |              |             |              |           |           |           |
|-------------------|--------------|-------------|--------------|-----------|-----------|-----------|
| MSTRG. 161598. 1  |              | XLOC_167580 | 287 coding   | noncoding | noncoding | noncoding |
| MSTRG. 161633. 1  | LOC105369928 | XLOC_167589 | 237 coding   | noncoding | noncoding | noncoding |
| MSTRG. 161635. 1  |              | XLOC_167594 | 251 coding   | noncoding | noncoding | noncoding |
| MSTRG. 161665. 1  | RMST         | XLOC_167604 | 208 coding   | noncoding | noncoding | noncoding |
| MSTRG. 161673. 1  |              | XLOC_167611 | 368 coding   | coding    | noncoding | noncoding |
| MSTRG. 161734. 1  | TMPO         | XLOC_167621 | 407 coding   | noncoding | noncoding | noncoding |
| MSTRG. 161845. 5  | ANKS1B       | XLOC_167631 | 11930 coding | coding    | coding    | coding    |
| MSTRG. 161845. 9  | APAF1        | XLOC_167631 | 5920 coding  | coding    | noncoding | noncoding |
| MSTRG. 161845. 10 | ANKS1B       | XLOC_167631 | 9901 coding  | coding    | coding    | coding    |
| XM_017019049. 1   | UHRF1BP1L    | XLOC_167633 | 3741 coding  | coding    | coding    | coding    |
| NR_036632. 1      | GOLGA2P5     | XLOC_167648 | 2337 coding  | coding    | coding    | coding    |
| MSTRG. 161792. 1  | SLC17A8      | XLOC_167655 | 281 coding   | noncoding | noncoding | noncoding |
| MSTRG. 161794. 1  | SLC17A8      | XLOC_167656 | 227 coding   | noncoding | noncoding | noncoding |
| MSTRG. 162010. 6  | CHPT1        | XLOC_167678 | 1627 coding  | coding    | coding    | noncoding |
| MSTRG. 161946. 1  | PAH          | XLOC_167735 | 235 coding   | coding    | noncoding | noncoding |
| MSTRG. 161950. 1  | PAH          | XLOC_167737 | 291 coding   | noncoding | noncoding | noncoding |
| MSTRG. 161940. 1  |              | XLOC_167739 | 232 coding   | noncoding | noncoding | noncoding |
| MSTRG. 162052. 1  | C12orf42     | XLOC_167745 | 301 coding   | coding    | noncoding | noncoding |
| MSTRG. 162088. 1  | C12orf42     | XLOC_167754 | 280 coding   | noncoding | noncoding | noncoding |
| MSTRG. 162093. 1  | C12orf42     | XLOC_167756 | 272 coding   | coding    | noncoding | noncoding |
| MSTRG. 162372. 1  | TXNRD1       | XLOC_167778 | 277 coding   | noncoding | noncoding | noncoding |
| MSTRG. 162403. 14 | CHST11       | XLOC_167793 | 13472 coding | noncoding | coding    | noncoding |
| MSTRG. 162403. 29 | CHST11       | XLOC_167793 | 3026 coding  | coding    | coding    | noncoding |
| MSTRG. 162403. 32 | CHST11       | XLOC_167793 | 2580 coding  | noncoding | coding    | noncoding |
| MSTRG. 162132. 1  |              | XLOC_167838 | 268 coding   | noncoding | noncoding | noncoding |
| MSTRG. 162237. 1  | LOC105369957 | XLOC_167867 | 245 coding   | noncoding | noncoding | noncoding |
| MSTRG. 162298. 1  | NUAK1        | XLOC_167910 | 204 coding   | noncoding | noncoding | noncoding |
| MSTRG. 162316. 1  |              | XLOC_167916 | 265 coding   | coding    | noncoding | noncoding |
| MSTRG. 162317. 1  |              | XLOC_167917 | 262 coding   | noncoding | noncoding | noncoding |
| MSTRG. 162339. 1  |              | XLOC_167922 | 476 coding   | noncoding | noncoding | noncoding |
| MSTRG. 162360. 1  |              | XLOC_167942 | 228 coding   | noncoding | noncoding | noncoding |
| MSTRG. 162559. 1  |              | XLOC_167976 | 348 coding   | noncoding | noncoding | noncoding |
| MSTRG. 162567. 1  |              | XLOC_167981 | 279 coding   | noncoding | noncoding | noncoding |
| XM_017019123. 2   | CORO1C       | XLOC_168014 | 4300 coding  | coding    | coding    | coding    |
| MSTRG. 162633. 1  |              | XLOC_168015 | 229 coding   | noncoding | noncoding | noncoding |
| MSTRG. 162617. 1  |              | XLOC_168023 | 241 coding   | noncoding | noncoding | noncoding |
| MSTRG. 162635. 1  | DAO          | XLOC_168024 | 295 coding   | noncoding | noncoding | noncoding |
| MSTRG. 162690. 1  | USP30        | XLOC_168029 | 272 coding   | noncoding | noncoding | noncoding |
| MSTRG. 162692. 3  | USP30        | XLOC_168030 | 800 coding   | noncoding | noncoding | noncoding |
| MSTRG. 162711. 1  | ACACB        | XLOC_168038 | 312 coding   | noncoding | noncoding | noncoding |
| MSTRG. 162698. 1  |              | XLOC_168059 | 260 coding   | noncoding | noncoding | noncoding |
| MSTRG. 162768. 11 | UBE3B        | XLOC_168062 | 2956 coding  | coding    | coding    | coding    |
| MSTRG. 162739. 1  |              | XLOC_168076 | 293 coding   | noncoding | noncoding | noncoding |

|                  |              |             |              |           |           |           |
|------------------|--------------|-------------|--------------|-----------|-----------|-----------|
| MSTRG. 162740. 1 |              | XLOC_168077 | 311 coding   | noncoding | noncoding | noncoding |
| MSTRG. 162786. 3 | TCHP         | XLOC_168087 | 354 coding   | noncoding | noncoding | noncoding |
| MSTRG. 162805. 1 |              | XLOC_168107 | 244 coding   | noncoding | noncoding | noncoding |
| MSTRG. 162825. 1 | IFT81        | XLOC_168111 | 290 coding   | noncoding | noncoding | noncoding |
| MSTRG. 162842. 1 | ANAPC7       | XLOC_168117 | 292 coding   | noncoding | noncoding | noncoding |
| MSTRG. 162844. 1 |              | XLOC_168131 | 301 coding   | noncoding | noncoding | noncoding |
| XM_005253948. 2  | HVCN1        | XLOC_168140 | 1721 coding  | coding    | coding    | coding    |
| MSTRG. 162867. 1 | CCDC63       | XLOC_168147 | 224 coding   | noncoding | noncoding | noncoding |
| MSTRG. 162880. 1 |              | XLOC_168167 | 257 coding   | noncoding | noncoding | noncoding |
| NM_002973. 4     | ATXN2        | XLOC_168169 | 4341 coding  | coding    | coding    | coding    |
| XM_017020192. 2  | TMEM116      | XLOC_168180 | 3074 coding  | noncoding | coding    | coding    |
| MSTRG. 163019. 1 | HECTD4       | XLOC_168200 | 309 coding   | noncoding | noncoding | noncoding |
| MSTRG. 163022. 1 | HECTD4       | XLOC_168203 | 286 coding   | noncoding | noncoding | noncoding |
| MSTRG. 162955. 1 |              | XLOC_168206 | 326 coding   | noncoding | noncoding | noncoding |
| NM_001320141. 2  | RPL6         | XLOC_168207 | 1238 coding  | coding    | coding    | coding    |
| MSTRG. 162962. 4 | PTPN11       | XLOC_168208 | 3858 coding  | coding    | noncoding | noncoding |
| MSTRG. 162971. 1 | RPH3A        | XLOC_168212 | 300 coding   | noncoding | noncoding | noncoding |
| MSTRG. 163096. 1 | DDX54        | XLOC_168228 | 205 coding   | noncoding | noncoding | noncoding |
| MSTRG. 163044. 1 |              | XLOC_168241 | 236 coding   | noncoding | noncoding | noncoding |
| MSTRG. 163053. 1 |              | XLOC_168245 | 634 coding   | noncoding | noncoding | noncoding |
| MSTRG. 163084. 1 |              | XLOC_168265 | 294 coding   | noncoding | noncoding | noncoding |
| MSTRG. 163117. 1 | LOC105370000 | XLOC_168273 | 231 coding   | noncoding | noncoding | noncoding |
| MSTRG. 163123. 1 | LOC107984437 | XLOC_168277 | 245 coding   | noncoding | noncoding | noncoding |
| MSTRG. 163134. 1 |              | XLOC_168284 | 296 coding   | coding    | noncoding | noncoding |
| MSTRG. 163153. 1 |              | XLOC_168293 | 272 coding   | noncoding | noncoding | noncoding |
| MSTRG. 163195. 1 | LOC105370003 | XLOC_168307 | 292 coding   | noncoding | noncoding | noncoding |
| MSTRG. 163206. 1 |              | XLOC_168339 | 242 coding   | noncoding | noncoding | noncoding |
| MSTRG. 163209. 1 |              | XLOC_168342 | 244 coding   | noncoding | noncoding | noncoding |
| MSTRG. 163210. 1 |              | XLOC_168343 | 263 coding   | noncoding | noncoding | noncoding |
| MSTRG. 163212. 1 |              | XLOC_168347 | 237 coding   | noncoding | noncoding | noncoding |
| NM_015002. 3     | FBXO21       | XLOC_168385 | 5976 coding  | coding    | coding    | coding    |
| MSTRG. 163313. 1 | FBXO21       | XLOC_168387 | 308 coding   | noncoding | noncoding | noncoding |
| MSTRG. 163254. 1 |              | XLOC_168390 | 253 coding   | noncoding | noncoding | noncoding |
| NM_001204218. 1  | NOS1         | XLOC_168391 | 12285 coding | coding    | coding    | coding    |
| MSTRG. 163266. 1 | NOS1         | XLOC_168394 | 270 coding   | noncoding | noncoding | noncoding |
| MSTRG. 163258. 1 |              | XLOC_168398 | 246 coding   | noncoding | noncoding | noncoding |
| XM_011538225. 3  | KSR2         | XLOC_168399 | 17784 coding | coding    | coding    | coding    |
| MSTRG. 163330. 1 | KSR2         | XLOC_168409 | 212 coding   | noncoding | noncoding | noncoding |
| MSTRG. 163336. 1 | KSR2         | XLOC_168412 | 214 coding   | noncoding | noncoding | noncoding |
| XM_017019410. 2  | TAOK3        | XLOC_168421 | 4583 coding  | coding    | coding    | coding    |
| MSTRG. 163455. 1 | TAOK3        | XLOC_168423 | 220 coding   | noncoding | noncoding | noncoding |
| MSTRG. 163460. 1 | TAOK3        | XLOC_168428 | 221 coding   | noncoding | noncoding | noncoding |
| MSTRG. 163376. 1 |              | XLOC_168449 | 1032 coding  | noncoding | noncoding | noncoding |

|                   |              |             |             |           |           |           |
|-------------------|--------------|-------------|-------------|-----------|-----------|-----------|
| MSTRG. 163381. 1  |              | XLOC_168453 | 326 coding  | noncoding | noncoding | noncoding |
| MSTRG. 163383. 1  |              | XLOC_168455 | 238 coding  | noncoding | noncoding | noncoding |
| MSTRG. 163391. 1  | LINC02423    | XLOC_168460 | 264 coding  | noncoding | noncoding | noncoding |
| XR_001749345. 1   | LOC107984440 | XLOC_168476 | 3331 coding | noncoding | noncoding | noncoding |
| MSTRG. 163478. 1  | CIT          | XLOC_168484 | 268 coding  | noncoding | noncoding | noncoding |
| MSTRG. 163449. 1  | LOC112268087 | XLOC_168492 | 259 coding  | noncoding | noncoding | noncoding |
| MSTRG. 163534. 2  | GCN1         | XLOC_168525 | 283 coding  | noncoding | noncoding | noncoding |
| MSTRG. 163537. 1  | GCN1         | XLOC_168528 | 223 coding  | noncoding | noncoding | noncoding |
| MSTRG. 163529. 1  | SIRT4        | XLOC_168536 | 289 coding  | noncoding | noncoding | noncoding |
| NM_016399. 3      | TRIAP1       | XLOC_168540 | 1151 coding | coding    | coding    | noncoding |
| MSTRG. 163560. 1  |              | XLOC_168547 | 713 coding  | noncoding | noncoding | noncoding |
| MSTRG. 163578. 1  |              | XLOC_168575 | 286 coding  | noncoding | noncoding | noncoding |
| MSTRG. 163580. 1  |              | XLOC_168576 | 224 coding  | noncoding | noncoding | noncoding |
| MSTRG. 163584. 1  | HNF1A        | XLOC_168579 | 249 coding  | noncoding | noncoding | noncoding |
| MSTRG. 163631. 1  | LOC105370030 | XLOC_168585 | 269 coding  | noncoding | noncoding | noncoding |
| MSTRG. 163625. 1  | ANAPC5       | XLOC_168597 | 205 coding  | noncoding | noncoding | noncoding |
| MSTRG. 163657. 1  | LOC105370034 | XLOC_168606 | 254 coding  | noncoding | noncoding | noncoding |
| MSTRG. 163673. 1  | TMEM120B     | XLOC_168607 | 461 coding  | noncoding | noncoding | noncoding |
| MSTRG. 163685. 1  |              | XLOC_168622 | 265 coding  | noncoding | noncoding | noncoding |
| MSTRG. 163707. 1  | LRRC43       | XLOC_168631 | 242 coding  | noncoding | noncoding | noncoding |
| MSTRG. 163732. 1  | CLIP1        | XLOC_168643 | 321 coding  | noncoding | noncoding | noncoding |
| MSTRG. 163723. 1  | ZCCHC8       | XLOC_168645 | 304 coding  | noncoding | noncoding | noncoding |
| MSTRG. 163735. 1  |              | XLOC_168652 | 288 coding  | noncoding | noncoding | noncoding |
| MSTRG. 163736. 1  |              | XLOC_168653 | 237 coding  | noncoding | noncoding | noncoding |
| MSTRG. 163738. 1  |              | XLOC_168655 | 264 coding  | noncoding | noncoding | noncoding |
| MSTRG. 163748. 1  | CCDC62       | XLOC_168663 | 253 coding  | noncoding | noncoding | noncoding |
| MSTRG. 163757. 1  | HIP1R        | XLOC_168666 | 2815 coding | coding    | coding    | coding    |
| XM_011538098. 2   | ABCB9        | XLOC_168674 | 4395 coding | coding    | coding    | coding    |
| MSTRG. 163777. 1  | ABCB9        | XLOC_168675 | 306 coding  | noncoding | noncoding | noncoding |
| MSTRG. 163802. 21 | MPHOSPH9     | XLOC_168683 | 596 coding  | noncoding | noncoding | coding    |
| MSTRG. 163909. 1  | ZNF664-RFLNA | XLOC_168720 | 249 coding  | noncoding | noncoding | noncoding |
| MSTRG. 163915. 1  | ZNF664-RFLNA | XLOC_168724 | 232 coding  | noncoding | noncoding | noncoding |
| MSTRG. 163876. 1  | SCARB1       | XLOC_168749 | 590 coding  | noncoding | noncoding | noncoding |
| MSTRG. 163920. 1  |              | XLOC_168760 | 265 coding  | noncoding | noncoding | noncoding |
| MSTRG. 163999. 1  | BRI3BP       | XLOC_168763 | 296 coding  | noncoding | noncoding | noncoding |
| MSTRG. 164005. 1  | AACS         | XLOC_168766 | 326 coding  | noncoding | noncoding | noncoding |
| MSTRG. 164023. 1  | TMEM132B     | XLOC_168773 | 258 coding  | noncoding | noncoding | noncoding |
| MSTRG. 164034. 1  | TMEM132B     | XLOC_168781 | 228 coding  | noncoding | noncoding | noncoding |
| MSTRG. 164048. 1  | LINC02826    | XLOC_168791 | 299 coding  | noncoding | noncoding | noncoding |
| MSTRG. 164019. 1  |              | XLOC_168792 | 227 coding  | noncoding | noncoding | noncoding |
| MSTRG. 164082. 1  | LINC02405    | XLOC_168820 | 358 coding  | noncoding | noncoding | noncoding |
| MSTRG. 164065. 1  | LOC105370064 | XLOC_168824 | 228 coding  | noncoding | noncoding | noncoding |
| MSTRG. 164095. 1  |              | XLOC_168834 | 241 coding  | noncoding | noncoding | noncoding |

|                 |              |             |             |           |           |           |
|-----------------|--------------|-------------|-------------|-----------|-----------|-----------|
| MSTRG.164100.1  |              | XLOC_168836 | 296 coding  | noncoding | noncoding | noncoding |
| MSTRG.164107.1  |              | XLOC_168843 | 201 coding  | noncoding | noncoding | noncoding |
| MSTRG.164109.1  |              | XLOC_168846 | 341 coding  | noncoding | noncoding | noncoding |
| MSTRG.164148.1  | LINC02369    | XLOC_168853 | 291 coding  | noncoding | noncoding | noncoding |
| MSTRG.164161.1  | TMEM132C     | XLOC_168857 | 301 coding  | noncoding | noncoding | noncoding |
| MSTRG.164162.1  | TMEM132C     | XLOC_168858 | 242 coding  | noncoding | noncoding | noncoding |
| MSTRG.164387.1  | TMEM132D     | XLOC_168912 | 217 coding  | coding    | noncoding | noncoding |
| MSTRG.164202.1  |              | XLOC_168922 | 223 coding  | coding    | noncoding | noncoding |
| XR_001749407.2  | LOC101929974 | XLOC_168970 | 6144 coding | noncoding | noncoding | noncoding |
| MSTRG.164320.1  | ULK1         | XLOC_168992 | 265 coding  | noncoding | noncoding | noncoding |
| MSTRG.164413.1  | LOC105370092 | XLOC_169014 | 226 coding  | noncoding | noncoding | noncoding |
| MSTRG.164483.1  | POLE         | XLOC_169054 | 242 coding  | noncoding | noncoding | noncoding |
| MSTRG.164520.1  | GOLGA3       | XLOC_169066 | 259 coding  | noncoding | noncoding | noncoding |
| MSTRG.164527.1  | CHFR         | XLOC_169068 | 463 coding  | noncoding | noncoding | noncoding |
| MSTRG.164528.1  | CHFR         | XLOC_169069 | 267 coding  | noncoding | noncoding | noncoding |
| NM_001164715.2  | ZNF605       | XLOC_169074 | 9312 coding | coding    | coding    | coding    |
| MSTRG.164595.1  |              | XLOC_169118 | 288 coding  | noncoding | noncoding | noncoding |
| MSTRG.164759.18 | PSPC1        | XLOC_169127 | 1826 coding | coding    | coding    | noncoding |
| MSTRG.164780.1  |              | XLOC_169135 | 286 coding  | noncoding | noncoding | noncoding |
| MSTRG.164783.1  |              | XLOC_169136 | 266 coding  | noncoding | noncoding | noncoding |
| MSTRG.164784.1  |              | XLOC_169137 | 537 coding  | noncoding | noncoding | noncoding |
| XM_017020733.2  | ZMYM2        | XLOC_169138 | 4798 coding | coding    | coding    | coding    |
| MSTRG.164625.1  | LOC105370102 | XLOC_169163 | 212 coding  | noncoding | noncoding | noncoding |
| MSTRG.164668.1  |              | XLOC_169187 | 234 coding  | noncoding | noncoding | noncoding |
| MSTRG.164675.1  | LOC105370104 | XLOC_169192 | 303 coding  | noncoding | noncoding | noncoding |
| MSTRG.164713.4  | SKA3         | XLOC_169199 | 1086 coding | noncoding | noncoding | noncoding |
| MSTRG.164728.12 | MIPEPP3      | XLOC_169205 | 4445 coding | coding    | coding    | noncoding |
| MSTRG.164728.22 | MIPEPP3      | XLOC_169205 | 1335 coding | coding    | noncoding | noncoding |
| MSTRG.164751.1  | MIPEPP3      | XLOC_169221 | 232 coding  | noncoding | noncoding | noncoding |
| MSTRG.164842.1  |              | XLOC_169259 | 376 coding  | noncoding | noncoding | noncoding |
| MSTRG.164844.1  |              | XLOC_169260 | 243 coding  | noncoding | noncoding | noncoding |
| MSTRG.164858.1  | LINC00621    | XLOC_169268 | 247 coding  | noncoding | noncoding | noncoding |
| MSTRG.164861.1  |              | XLOC_169271 | 278 coding  | noncoding | noncoding | noncoding |
| MSTRG.164864.1  |              | XLOC_169274 | 226 coding  | noncoding | noncoding | noncoding |
| MSTRG.164890.1  | SACS         | XLOC_169282 | 288 coding  | noncoding | noncoding | noncoding |
| NR_038995.1     | LINC00327    | XLOC_169286 | 2087 coding | noncoding | coding    | noncoding |
| MSTRG.164880.1  |              | XLOC_169288 | 245 coding  | noncoding | noncoding | noncoding |
| MSTRG.164937.1  | SPATA13      | XLOC_169307 | 240 coding  | noncoding | noncoding | noncoding |
| NR_002815.2     | TPTE2P6      | XLOC_169329 | 2716 coding | coding    | noncoding | noncoding |
| MSTRG.165138.1  |              | XLOC_169340 | 232 coding  | noncoding | noncoding | noncoding |
| MSTRG.165147.1  |              | XLOC_169360 | 278 coding  | noncoding | noncoding | noncoding |
| MSTRG.165167.1  | ATP8A2       | XLOC_169365 | 272 coding  | noncoding | noncoding | noncoding |
| MSTRG.165174.1  | ATP8A2       | XLOC_169368 | 286 coding  | noncoding | noncoding | noncoding |

|                  |              |             |             |           |           |           |
|------------------|--------------|-------------|-------------|-----------|-----------|-----------|
| MSTRG. 165184. 1 | ATP8A2       | XLOC_169371 | 230 coding  | noncoding | noncoding | noncoding |
| MSTRG. 165157. 1 | SHISA2       | XLOC_169374 | 369 coding  | noncoding | noncoding | noncoding |
| MSTRG. 165192. 1 |              | XLOC_169385 | 649 coding  | noncoding | noncoding | noncoding |
| MSTRG. 165250. 1 | CDK8         | XLOC_169389 | 503 coding  | noncoding | noncoding | noncoding |
| MSTRG. 165255. 1 | CDK8         | XLOC_169393 | 260 coding  | noncoding | noncoding | noncoding |
| MSTRG. 165210. 1 |              | XLOC_169396 | 299 coding  | noncoding | noncoding | noncoding |
| MSTRG. 165267. 1 |              | XLOC_169429 | 241 coding  | noncoding | noncoding | noncoding |
| MSTRG. 165297. 1 |              | XLOC_169437 | 260 coding  | noncoding | noncoding | noncoding |
| MSTRG. 165310. 1 |              | XLOC_169439 | 276 coding  | noncoding | noncoding | noncoding |
| MSTRG. 165317. 1 |              | XLOC_169444 | 261 coding  | noncoding | noncoding | noncoding |
| MSTRG. 165345. 1 | URAD         | XLOC_169469 | 207 coding  | noncoding | noncoding | noncoding |
| MSTRG. 165369. 1 |              | XLOC_169496 | 343 coding  | noncoding | noncoding | noncoding |
| MSTRG. 165409. 1 |              | XLOC_169511 | 243 coding  | noncoding | coding    | noncoding |
| MSTRG. 165431. 1 | MTUS2        | XLOC_169517 | 244 coding  | coding    | noncoding | noncoding |
| MSTRG. 165441. 1 | MTUS2        | XLOC_169522 | 255 coding  | coding    | noncoding | noncoding |
| MSTRG. 165454. 1 | MTUS2        | XLOC_169530 | 341 coding  | noncoding | noncoding | noncoding |
| MSTRG. 165492. 1 | LINC00297    | XLOC_169566 | 297 coding  | noncoding | noncoding | noncoding |
| MSTRG. 165563. 1 |              | XLOC_169604 | 276 coding  | noncoding | noncoding | noncoding |
| MSTRG. 165582. 1 | HMGB1        | XLOC_169615 | 290 coding  | noncoding | noncoding | noncoding |
| MSTRG. 165574. 1 |              | XLOC_169646 | 307 coding  | noncoding | noncoding | noncoding |
| MSTRG. 165658. 1 |              | XLOC_169655 | 255 coding  | noncoding | noncoding | noncoding |
| MSTRG. 165663. 1 |              | XLOC_169661 | 213 coding  | noncoding | noncoding | noncoding |
| MSTRG. 165733. 1 | LOC105370148 | XLOC_169666 | 269 coding  | noncoding | noncoding | noncoding |
| MSTRG. 166316. 1 | FRY          | XLOC_169776 | 283 coding  | noncoding | noncoding | noncoding |
| MSTRG. 165798. 6 | N4BP2L1      | XLOC_169812 | 1188 coding | noncoding | noncoding | noncoding |
| MSTRG. 165756. 1 |              | XLOC_169815 | 291 coding  | noncoding | noncoding | noncoding |
| MSTRG. 165763. 1 | LINC00423    | XLOC_169840 | 393 coding  | noncoding | noncoding | noncoding |
| MSTRG. 165864. 1 | STARD13      | XLOC_169856 | 313 coding  | noncoding | noncoding | noncoding |
| MSTRG. 165868. 1 | STARD13      | XLOC_169860 | 227 coding  | noncoding | noncoding | noncoding |
| MSTRG. 165815. 1 |              | XLOC_169896 | 249 coding  | noncoding | noncoding | noncoding |
| XM_011535173. 3  | RFC3         | XLOC_169900 | 3791 coding | coding    | coding    | coding    |
| MSTRG. 165994. 1 | RFC3         | XLOC_169904 | 362 coding  | noncoding | noncoding | noncoding |
| MSTRG. 165949. 1 | LINC00457    | XLOC_169919 | 277 coding  | noncoding | noncoding | noncoding |
| MSTRG. 165930. 1 |              | XLOC_169922 | 260 coding  | noncoding | noncoding | noncoding |
| MSTRG. 165957. 1 |              | XLOC_169929 | 311 coding  | noncoding | noncoding | noncoding |
| MSTRG. 165961. 1 |              | XLOC_169931 | 209 coding  | noncoding | noncoding | noncoding |
| MSTRG. 165964. 1 |              | XLOC_169934 | 228 coding  | noncoding | noncoding | noncoding |
| MSTRG. 166135. 1 | NBEA         | XLOC_169947 | 707 coding  | noncoding | noncoding | noncoding |
| MSTRG. 166162. 1 | NBEA         | XLOC_169953 | 275 coding  | noncoding | noncoding | noncoding |
| MSTRG. 166172. 1 | NBEA         | XLOC_169958 | 431 coding  | noncoding | noncoding | noncoding |
| MSTRG. 166030. 1 | DCLK1        | XLOC_169966 | 201 coding  | noncoding | noncoding | noncoding |
| MSTRG. 166087. 1 | SMAD9        | XLOC_169989 | 228 coding  | noncoding | noncoding | noncoding |
| MSTRG. 166089. 1 | SMAD9        | XLOC_169991 | 280 coding  | noncoding | noncoding | noncoding |

|                  |              |             |              |           |           |           |
|------------------|--------------|-------------|--------------|-----------|-----------|-----------|
| MSTRG. 166185. 1 |              | XLOC_170058 | 217 coding   | coding    | noncoding | noncoding |
| MSTRG. 166189. 1 |              | XLOC_170060 | 279 coding   | noncoding | noncoding | noncoding |
| NM_207361. 6     | FREM2        | XLOC_170102 | 16122 coding | coding    | noncoding | coding    |
| MSTRG. 166413. 1 |              | XLOC_170111 | 238 coding   | noncoding | noncoding | noncoding |
| MSTRG. 166425. 1 |              | XLOC_170130 | 241 coding   | noncoding | noncoding | noncoding |
| MSTRG. 166561. 1 | COG6         | XLOC_170141 | 322 coding   | noncoding | noncoding | noncoding |
| MSTRG. 166563. 1 | COG6         | XLOC_170142 | 259 coding   | noncoding | noncoding | noncoding |
| MSTRG. 166526. 1 |              | XLOC_170145 | 466 coding   | noncoding | noncoding | noncoding |
| MSTRG. 166525. 1 |              | XLOC_170146 | 314 coding   | noncoding | noncoding | noncoding |
| MSTRG. 166572. 1 |              | XLOC_170192 | 251 coding   | noncoding | noncoding | noncoding |
| MSTRG. 166575. 1 |              | XLOC_170194 | 331 coding   | noncoding | noncoding | noncoding |
| MSTRG. 166685. 5 | TPTE2P5      | XLOC_170218 | 2602 coding  | coding    | coding    | noncoding |
| MSTRG. 166761. 1 | LOC101929140 | XLOC_170246 | 268 coding   | noncoding | noncoding | noncoding |
| MSTRG. 166763. 3 | MTRF1        | XLOC_170247 | 1478 coding  | coding    | noncoding | noncoding |
| MSTRG. 166735. 1 |              | XLOC_170261 | 258 coding   | noncoding | noncoding | noncoding |
| NM_001204504. 2  | DGKH         | XLOC_170276 | 17344 coding | coding    | coding    | coding    |
| MSTRG. 166789. 1 | LINC02341    | XLOC_170295 | 289 coding   | noncoding | noncoding | noncoding |
| MSTRG. 166807. 1 |              | XLOC_170308 | 233 coding   | noncoding | noncoding | noncoding |
| MSTRG. 166907. 1 |              | XLOC_170352 | 259 coding   | noncoding | noncoding | noncoding |
| MSTRG. 166948. 1 |              | XLOC_170361 | 291 coding   | coding    | noncoding | noncoding |
| MSTRG. 167002. 1 |              | XLOC_170370 | 231 coding   | noncoding | noncoding | noncoding |
| MSTRG. 167003. 1 |              | XLOC_170371 | 232 coding   | noncoding | noncoding | noncoding |
| MSTRG. 167010. 1 | LINC00407    | XLOC_170374 | 281 coding   | noncoding | noncoding | noncoding |
| MSTRG. 167017. 1 |              | XLOC_170379 | 317 coding   | noncoding | noncoding | noncoding |
| MSTRG. 167027. 1 | LOC105370187 | XLOC_170381 | 339 coding   | noncoding | noncoding | noncoding |
| XM_011535144. 2  | GPALPP1      | XLOC_170392 | 4241 coding  | coding    | coding    | coding    |
| MSTRG. 167033. 1 | LOC107984596 | XLOC_170395 | 244 coding   | noncoding | noncoding | noncoding |
| MSTRG. 167031. 1 |              | XLOC_170397 | 398 coding   | noncoding | noncoding | noncoding |
| MSTRG. 167132. 1 | TPT1-AS1     | XLOC_170415 | 218 coding   | noncoding | noncoding | noncoding |
| MSTRG. 167134. 1 | TPT1-AS1     | XLOC_170417 | 309 coding   | noncoding | noncoding | noncoding |
| MSTRG. 167103. 1 | COG3         | XLOC_170422 | 237 coding   | noncoding | noncoding | noncoding |
| MSTRG. 167076. 1 |              | XLOC_170428 | 317 coding   | noncoding | noncoding | noncoding |
| MSTRG. 167077. 1 |              | XLOC_170429 | 246 coding   | noncoding | noncoding | noncoding |
| MSTRG. 167294. 1 | LRCH1        | XLOC_170478 | 262 coding   | noncoding | noncoding | noncoding |
| MSTRG. 167236. 1 |              | XLOC_170490 | 309 coding   | noncoding | noncoding | noncoding |
| MSTRG. 167269. 1 |              | XLOC_170504 | 257 coding   | noncoding | noncoding | noncoding |
| MSTRG. 167370. 1 | LOC105370202 | XLOC_170597 | 258 coding   | noncoding | noncoding | noncoding |
| MSTRG. 167371. 1 | LOC105370202 | XLOC_170598 | 268 coding   | noncoding | noncoding | noncoding |
| MSTRG. 167386. 1 |              | XLOC_170610 | 274 coding   | noncoding | noncoding | noncoding |
| XM_017020442. 2  | FNDC3A       | XLOC_170616 | 6138 coding  | coding    | coding    | coding    |
| NR_135322. 1     | PHF11        | XLOC_170663 | 1593 coding  | coding    | coding    | coding    |
| NR_135323. 1     | PHF11        | XLOC_170663 | 1692 coding  | coding    | coding    | coding    |
| MSTRG. 167510. 1 |              | XLOC_170676 | 242 coding   | noncoding | noncoding | noncoding |

|                   |              |             |             |           |           |           |
|-------------------|--------------|-------------|-------------|-----------|-----------|-----------|
| MSTRG. 167519. 1  |              | XLOC_170682 | 237 coding  | noncoding | noncoding | noncoding |
| MSTRG. 168771. 4  | TRIM13       | XLOC_170686 | 1923 coding | noncoding | noncoding | noncoding |
| MSTRG. 168771. 11 | TRIM13       | XLOC_170686 | 4102 coding | noncoding | noncoding | noncoding |
| MSTRG. 168771. 14 | TRIM13       | XLOC_170686 | 9023 coding | coding    | coding    | coding    |
| NM_005798. 5      | TRIM13       | XLOC_170686 | 6720 coding | coding    | coding    | coding    |
| MSTRG. 168771. 30 | DLEU2        | XLOC_170686 | 749 coding  | noncoding | noncoding | noncoding |
| MSTRG. 168853. 1  | DLEU1        | XLOC_170697 | 315 coding  | noncoding | noncoding | noncoding |
| MSTRG. 169000. 1  | RNASEH2B     | XLOC_170733 | 355 coding  | noncoding | noncoding | noncoding |
| XM_011534978. 2   | FAM124A      | XLOC_170739 | 4926 coding | coding    | coding    | coding    |
| MSTRG. 167572. 1  |              | XLOC_170750 | 282 coding  | noncoding | noncoding | noncoding |
| MSTRG. 167602. 1  |              | XLOC_170761 | 280 coding  | noncoding | noncoding | noncoding |
| MSTRG. 167620. 1  | TPTE2P2      | XLOC_170789 | 241 coding  | noncoding | noncoding | noncoding |
| MSTRG. 167616. 1  |              | XLOC_170792 | 254 coding  | noncoding | noncoding | noncoding |
| MSTRG. 167617. 1  |              | XLOC_170793 | 277 coding  | noncoding | noncoding | noncoding |
| MSTRG. 167655. 4  | VPS36        | XLOC_170795 | 1189 coding | coding    | coding    | noncoding |
| MSTRG. 167698. 1  | HNRNPA1L2    | XLOC_170801 | 269 coding  | noncoding | noncoding | noncoding |
| MSTRG. 167690. 1  |              | XLOC_170823 | 259 coding  | noncoding | noncoding | noncoding |
| MSTRG. 167721. 1  |              | XLOC_170828 | 488 coding  | noncoding | coding    | noncoding |
| MSTRG. 167741. 1  |              | XLOC_170843 | 261 coding  | noncoding | noncoding | noncoding |
| MSTRG. 167752. 1  |              | XLOC_170850 | 216 coding  | noncoding | noncoding | noncoding |
| MSTRG. 167760. 1  |              | XLOC_170853 | 228 coding  | noncoding | noncoding | noncoding |
| MSTRG. 167769. 1  |              | XLOC_170858 | 293 coding  | coding    | noncoding | noncoding |
| MSTRG. 167789. 1  |              | XLOC_170868 | 237 coding  | noncoding | noncoding | noncoding |
| MSTRG. 167802. 1  |              | XLOC_170877 | 249 coding  | noncoding | noncoding | noncoding |
| MSTRG. 167833. 1  | LOC105370214 | XLOC_170881 | 289 coding  | noncoding | noncoding | noncoding |
| MSTRG. 167838. 1  | LOC105370214 | XLOC_170883 | 317 coding  | noncoding | noncoding | noncoding |
| MSTRG. 167818. 1  |              | XLOC_170893 | 436 coding  | noncoding | noncoding | noncoding |
| MSTRG. 167821. 1  |              | XLOC_170894 | 254 coding  | noncoding | noncoding | noncoding |
| MSTRG. 167876. 1  |              | XLOC_170908 | 441 coding  | coding    | noncoding | noncoding |
| MSTRG. 167882. 1  |              | XLOC_170913 | 293 coding  | noncoding | noncoding | noncoding |
| MSTRG. 167884. 1  |              | XLOC_170914 | 281 coding  | noncoding | noncoding | noncoding |
| MSTRG. 167909. 1  |              | XLOC_170925 | 274 coding  | noncoding | noncoding | noncoding |
| MSTRG. 167951. 1  |              | XLOC_170954 | 256 coding  | noncoding | noncoding | noncoding |
| MSTRG. 167975. 1  | LOC107984625 | XLOC_170962 | 226 coding  | noncoding | noncoding | noncoding |
| MSTRG. 167977. 1  | LOC107984625 | XLOC_170964 | 292 coding  | noncoding | noncoding | noncoding |
| MSTRG. 167986. 1  | LINC00434    | XLOC_170990 | 259 coding  | noncoding | noncoding | noncoding |
| MSTRG. 167993. 1  | LOC105370228 | XLOC_170994 | 253 coding  | noncoding | noncoding | noncoding |
| MSTRG. 167989. 1  |              | XLOC_170996 | 273 coding  | noncoding | noncoding | noncoding |
| MSTRG. 168034. 1  |              | XLOC_171009 | 310 coding  | noncoding | noncoding | noncoding |
| MSTRG. 168037. 1  |              | XLOC_171011 | 424 coding  | noncoding | noncoding | noncoding |
| MSTRG. 168047. 1  | LINC01442    | XLOC_171014 | 287 coding  | noncoding | noncoding | noncoding |
| MSTRG. 168065. 1  |              | XLOC_171026 | 283 coding  | noncoding | noncoding | noncoding |
| MSTRG. 168074. 1  |              | XLOC_171030 | 287 coding  | noncoding | noncoding | noncoding |

|                   |              |             |              |           |           |           |
|-------------------|--------------|-------------|--------------|-----------|-----------|-----------|
| MSTRG. 168085. 1  |              | XLOC_171037 | 250 coding   | noncoding | noncoding | noncoding |
| NR_002171. 2      | OR7E156P     | XLOC_171062 | 2647 coding  | coding    | noncoding | noncoding |
| MSTRG. 168129. 1  |              | XLOC_171064 | 213 coding   | noncoding | noncoding | noncoding |
| MSTRG. 168145. 1  |              | XLOC_171069 | 294 coding   | noncoding | noncoding | noncoding |
| MSTRG. 168157. 1  |              | XLOC_171074 | 863 coding   | noncoding | noncoding | noncoding |
| MSTRG. 168174. 1  |              | XLOC_171083 | 281 coding   | noncoding | noncoding | noncoding |
| MSTRG. 168190. 1  |              | XLOC_171091 | 282 coding   | coding    | noncoding | noncoding |
| MSTRG. 168191. 1  |              | XLOC_171092 | 296 coding   | noncoding | noncoding | noncoding |
| MSTRG. 168211. 1  | LOC105370245 | XLOC_171101 | 229 coding   | noncoding | noncoding | noncoding |
| MSTRG. 168234. 1  |              | XLOC_171140 | 261 coding   | coding    | noncoding | noncoding |
| MSTRG. 168239. 1  | LOC105370248 | XLOC_171143 | 252 coding   | coding    | noncoding | noncoding |
| MSTRG. 168250. 1  |              | XLOC_171152 | 247 coding   | noncoding | noncoding | noncoding |
| MSTRG. 168253. 1  |              | XLOC_171154 | 262 coding   | noncoding | noncoding | noncoding |
| MSTRG. 168255. 1  |              | XLOC_171155 | 341 coding   | coding    | coding    | noncoding |
| MSTRG. 168284. 1  |              | XLOC_171170 | 235 coding   | noncoding | noncoding | noncoding |
| MSTRG. 168295. 1  |              | XLOC_171175 | 238 coding   | noncoding | noncoding | noncoding |
| MSTRG. 168304. 1  |              | XLOC_171181 | 270 coding   | noncoding | noncoding | noncoding |
| MSTRG. 168312. 1  |              | XLOC_171193 | 256 coding   | noncoding | noncoding | noncoding |
| MSTRG. 168376. 1  |              | XLOC_171215 | 310 coding   | coding    | noncoding | noncoding |
| MSTRG. 168435. 1  |              | XLOC_171221 | 285 coding   | coding    | noncoding | noncoding |
| MSTRG. 168447. 1  |              | XLOC_171308 | 335 coding   | noncoding | noncoding | noncoding |
| MSTRG. 168458. 1  |              | XLOC_171317 | 361 coding   | noncoding | noncoding | noncoding |
| MSTRG. 168466. 1  |              | XLOC_171321 | 234 coding   | noncoding | noncoding | noncoding |
| NM_024808. 5      | BORA         | XLOC_171331 | 2760 coding  | coding    | coding    | coding    |
| MSTRG. 168761. 1  | PIBF1        | XLOC_171347 | 216 coding   | noncoding | noncoding | noncoding |
| MSTRG. 168482. 1  |              | XLOC_171352 | 234 coding   | noncoding | noncoding | noncoding |
| MSTRG. 168483. 1  |              | XLOC_171353 | 479 coding   | noncoding | noncoding | noncoding |
| MSTRG. 168484. 1  |              | XLOC_171354 | 232 coding   | noncoding | noncoding | noncoding |
| MSTRG. 168492. 1  |              | XLOC_171357 | 297 coding   | noncoding | noncoding | noncoding |
| MSTRG. 168505. 1  |              | XLOC_171362 | 269 coding   | noncoding | noncoding | noncoding |
| MSTRG. 169029. 9  | KLF12        | XLOC_171380 | 2283 coding  | noncoding | noncoding | coding    |
| MSTRG. 169096. 1  | KLF12        | XLOC_171384 | 300 coding   | noncoding | noncoding | noncoding |
| MSTRG. 168662. 1  |              | XLOC_171455 | 312 coding   | noncoding | noncoding | noncoding |
| MSTRG. 169454. 4  | MYCBP2-AS1   | XLOC_171584 | 15103 coding | coding    | coding    | coding    |
| MSTRG. 169454. 19 | MYCBP2-AS1   | XLOC_171584 | 7745 coding  | coding    | noncoding | coding    |
| MSTRG. 169277. 1  | LOC100129307 | XLOC_171594 | 313 coding   | noncoding | noncoding | noncoding |
| MSTRG. 169281. 1  |              | XLOC_171596 | 341 coding   | noncoding | noncoding | noncoding |
| MSTRG. 169307. 1  | LOC112268121 | XLOC_171605 | 219 coding   | noncoding | noncoding | noncoding |
| MSTRG. 169323. 1  |              | XLOC_171618 | 257 coding   | noncoding | noncoding | noncoding |
| MSTRG. 169321. 1  |              | XLOC_171619 | 267 coding   | noncoding | noncoding | noncoding |
| MSTRG. 169325. 1  |              | XLOC_171620 | 257 coding   | noncoding | noncoding | noncoding |
| MSTRG. 169353. 1  |              | XLOC_171625 | 261 coding   | noncoding | noncoding | noncoding |
| MSTRG. 169364. 1  |              | XLOC_171641 | 229 coding   | noncoding | noncoding | noncoding |

|                  |              |             |              |           |           |           |
|------------------|--------------|-------------|--------------|-----------|-----------|-----------|
| MSTRG. 169393. 1 |              | XLOC_171657 | 230 coding   | noncoding | noncoding | noncoding |
| MSTRG. 169399. 1 | LOC101927238 | XLOC_171658 | 307 coding   | noncoding | noncoding | noncoding |
| MSTRG. 169401. 1 |              | XLOC_171660 | 256 coding   | noncoding | noncoding | noncoding |
| MSTRG. 169412. 1 |              | XLOC_171667 | 291 coding   | noncoding | noncoding | noncoding |
| MSTRG. 169590. 1 |              | XLOC_171688 | 243 coding   | noncoding | noncoding | noncoding |
| MSTRG. 169608. 1 |              | XLOC_171695 | 269 coding   | noncoding | noncoding | noncoding |
| MSTRG. 169625. 1 | LOC105370284 | XLOC_171703 | 229 coding   | noncoding | noncoding | noncoding |
| MSTRG. 169627. 1 | LOC105370284 | XLOC_171704 | 236 coding   | noncoding | noncoding | noncoding |
| MSTRG. 169628. 1 |              | XLOC_171706 | 299 coding   | noncoding | noncoding | noncoding |
| MSTRG. 169630. 1 |              | XLOC_171708 | 267 coding   | noncoding | noncoding | noncoding |
| MSTRG. 169655. 1 |              | XLOC_171719 | 357 coding   | noncoding | noncoding | noncoding |
| MSTRG. 169662. 1 |              | XLOC_171724 | 392 coding   | noncoding | noncoding | noncoding |
| MSTRG. 169665. 1 |              | XLOC_171726 | 255 coding   | noncoding | noncoding | noncoding |
| MSTRG. 169668. 1 |              | XLOC_171728 | 229 coding   | noncoding | noncoding | noncoding |
| MSTRG. 169690. 1 |              | XLOC_171740 | 300 coding   | noncoding | noncoding | noncoding |
| MSTRG. 169702. 1 |              | XLOC_171746 | 274 coding   | coding    | noncoding | noncoding |
| MSTRG. 169727. 1 |              | XLOC_171767 | 239 coding   | noncoding | noncoding | noncoding |
| MSTRG. 169737. 1 | LINC00351    | XLOC_171770 | 309 coding   | noncoding | noncoding | noncoding |
| MSTRG. 169732. 1 |              | XLOC_171777 | 407 coding   | noncoding | noncoding | noncoding |
| MSTRG. 169795. 1 |              | XLOC_171784 | 308 coding   | noncoding | noncoding | noncoding |
| MSTRG. 169805. 1 | LOC105370299 | XLOC_171788 | 225 coding   | coding    | noncoding | noncoding |
| XM_005254038. 5  | SLITRK5      | XLOC_171815 | 5217 coding  | coding    | coding    | coding    |
| MSTRG. 169889. 1 |              | XLOC_171819 | 236 coding   | noncoding | noncoding | noncoding |
| MSTRG. 169895. 1 |              | XLOC_171832 | 256 coding   | noncoding | noncoding | noncoding |
| MSTRG. 169923. 1 |              | XLOC_171842 | 231 coding   | noncoding | noncoding | noncoding |
| MSTRG. 169927. 1 |              | XLOC_171843 | 258 coding   | noncoding | noncoding | noncoding |
| MSTRG. 169956. 1 |              | XLOC_171863 | 409 coding   | noncoding | noncoding | noncoding |
| MSTRG. 169974. 1 |              | XLOC_171871 | 793 coding   | noncoding | noncoding | noncoding |
| MSTRG. 169997. 1 |              | XLOC_171884 | 267 coding   | coding    | noncoding | noncoding |
| MSTRG. 170068. 1 | GPC5         | XLOC_171910 | 285 coding   | noncoding | noncoding | noncoding |
| MSTRG. 170073. 1 | GPC5         | XLOC_171914 | 235 coding   | noncoding | noncoding | noncoding |
| MSTRG. 170085. 1 | GPC5         | XLOC_171919 | 355 coding   | noncoding | noncoding | noncoding |
| MSTRG. 170040. 1 |              | XLOC_171939 | 250 coding   | noncoding | noncoding | noncoding |
| MSTRG. 170043. 1 |              | XLOC_171942 | 322 coding   | noncoding | noncoding | noncoding |
| MSTRG. 170140. 1 | GPC6         | XLOC_171950 | 379 coding   | noncoding | noncoding | noncoding |
| MSTRG. 170147. 1 | GPC6         | XLOC_171953 | 302 coding   | noncoding | noncoding | noncoding |
| MSTRG. 170196. 1 |              | XLOC_171985 | 296 coding   | noncoding | noncoding | noncoding |
| MSTRG. 170213. 1 |              | XLOC_171996 | 281 coding   | noncoding | noncoding | noncoding |
| MSTRG. 170216. 1 |              | XLOC_172006 | 276 coding   | noncoding | noncoding | noncoding |
| XM_011521076. 2  | HS6ST3       | XLOC_172041 | 4082 coding  | coding    | coding    | coding    |
| XM_017020543. 2  | HS6ST3       | XLOC_172041 | 11757 coding | coding    | coding    | coding    |
| MSTRG. 170286. 1 | HS6ST3       | XLOC_172044 | 215 coding   | noncoding | noncoding | noncoding |
| MSTRG. 170294. 1 | HS6ST3       | XLOC_172050 | 296 coding   | noncoding | noncoding | noncoding |

|                |              |             |              |           |           |           |
|----------------|--------------|-------------|--------------|-----------|-----------|-----------|
| MSTRG.170300.1 | HS6ST3       | XLOC_172053 | 248 coding   | noncoding | noncoding | noncoding |
| MSTRG.170339.1 |              | XLOC_172085 | 382 coding   | noncoding | noncoding | noncoding |
| MSTRG.170371.1 |              | XLOC_172102 | 269 coding   | noncoding | noncoding | noncoding |
| MSTRG.170397.1 |              | XLOC_172106 | 290 coding   | noncoding | noncoding | noncoding |
| MSTRG.170435.1 | FARP1        | XLOC_172114 | 10644 coding | coding    | coding    | coding    |
| MSTRG.170429.1 | SLC15A1      | XLOC_172124 | 225 coding   | noncoding | noncoding | noncoding |
| MSTRG.170602.1 | LOC101927437 | XLOC_172201 | 300 coding   | noncoding | noncoding | noncoding |
| MSTRG.170604.1 | LOC101927437 | XLOC_172202 | 284 coding   | noncoding | noncoding | noncoding |
| NR_047687.1    | NALCN-AS1    | XLOC_172218 | 2846 coding  | noncoding | noncoding | noncoding |
| MSTRG.170635.1 | NALCN        | XLOC_172225 | 248 coding   | noncoding | noncoding | noncoding |
| MSTRG.170642.1 | NALCN        | XLOC_172227 | 243 coding   | coding    | noncoding | noncoding |
| MSTRG.170658.1 | ITGBL1       | XLOC_172232 | 474 coding   | noncoding | noncoding | noncoding |
| MSTRG.170659.1 | ITGBL1       | XLOC_172233 | 262 coding   | coding    | noncoding | noncoding |
| MSTRG.170690.1 | FGF14        | XLOC_172247 | 591 coding   | coding    | noncoding | noncoding |
| MSTRG.170738.1 |              | XLOC_172298 | 227 coding   | noncoding | noncoding | noncoding |
| MSTRG.170748.1 |              | XLOC_172305 | 315 coding   | noncoding | noncoding | noncoding |
| MSTRG.170825.1 |              | XLOC_172335 | 288 coding   | noncoding | noncoding | noncoding |
| MSTRG.170852.1 | LINC00343    | XLOC_172348 | 377 coding   | noncoding | noncoding | noncoding |
| MSTRG.170843.1 |              | XLOC_172351 | 254 coding   | noncoding | noncoding | noncoding |
| MSTRG.170863.1 |              | XLOC_172361 | 232 coding   | noncoding | noncoding | noncoding |
| MSTRG.170869.1 |              | XLOC_172365 | 308 coding   | noncoding | noncoding | noncoding |
| MSTRG.170871.1 |              | XLOC_172366 | 230 coding   | noncoding | noncoding | noncoding |
| MSTRG.170967.1 | FAM155A      | XLOC_172400 | 205 coding   | noncoding | noncoding | noncoding |
| MSTRG.170933.1 |              | XLOC_172406 | 266 coding   | noncoding | noncoding | noncoding |
| MSTRG.170937.1 |              | XLOC_172409 | 338 coding   | noncoding | noncoding | noncoding |
| NM_001145645.2 | TNFSF13B     | XLOC_172427 | 2614 coding  | coding    | coding    | coding    |
| MSTRG.170985.1 |              | XLOC_172442 | 265 coding   | noncoding | noncoding | noncoding |
| XR_002957496.1 | LOC112268112 | XLOC_172521 | 15283 coding | noncoding | noncoding | noncoding |
| MSTRG.171143.1 | LOC101927646 | XLOC_172523 | 435 coding   | coding    | noncoding | noncoding |
| MSTRG.171145.1 | LOC101927712 | XLOC_172527 | 206 coding   | noncoding | noncoding | noncoding |
| NM_001846.4    | COL4A2       | XLOC_172531 | 6446 coding  | coding    | coding    | coding    |
| MSTRG.171163.1 | COL4A2-AS1   | XLOC_172535 | 291 coding   | noncoding | noncoding | noncoding |
| NM_001113513.2 | ARHGEF7      | XLOC_172563 | 4976 coding  | coding    | coding    | coding    |
| MSTRG.171369.1 | ARHGEF7      | XLOC_172566 | 263 coding   | noncoding | noncoding | noncoding |
| MSTRG.171246.1 |              | XLOC_172580 | 229 coding   | noncoding | noncoding | noncoding |
| MSTRG.171347.1 |              | XLOC_172595 | 269 coding   | noncoding | noncoding | noncoding |
| XM_005268299.4 | ATP11A       | XLOC_172611 | 9066 coding  | coding    | coding    | coding    |
| XM_005268300.4 | ATP11A       | XLOC_172611 | 9002 coding  | coding    | coding    | coding    |
| XM_011537476.2 | F7           | XLOC_172631 | 3543 coding  | coding    | coding    | coding    |
| MSTRG.171405.1 | F10          | XLOC_172633 | 214 coding   | noncoding | noncoding | noncoding |
| NM_001278513.2 | CUL4A        | XLOC_172638 | 6073 coding  | coding    | coding    | coding    |
| MSTRG.171494.1 | TMCO3        | XLOC_172659 | 403 coding   | noncoding | noncoding | noncoding |
| MSTRG.171554.4 | RASA3        | XLOC_172691 | 811 coding   | coding    | coding    | noncoding |

|                   |              |             |             |           |           |           |
|-------------------|--------------|-------------|-------------|-----------|-----------|-----------|
| MSTRG. 164589. 1  |              | XLOC_172718 | 303 coding  | noncoding | noncoding | noncoding |
| MSTRG. 164605. 1  |              | XLOC_172728 | 288 coding  | noncoding | noncoding | noncoding |
| NM_001354909. 2   | PSPC1        | XLOC_172737 | 2435 coding | coding    | coding    | coding    |
| NM_001142684. 2   | ZMYM5        | XLOC_172739 | 3283 coding | coding    | coding    | coding    |
| MSTRG. 164779. 1  |              | XLOC_172742 | 286 coding  | noncoding | noncoding | noncoding |
| MSTRG. 164781. 1  |              | XLOC_172743 | 293 coding  | noncoding | noncoding | noncoding |
| MSTRG. 164782. 1  |              | XLOC_172744 | 289 coding  | noncoding | noncoding | noncoding |
| MSTRG. 164610. 1  | LOC105370101 | XLOC_172749 | 232 coding  | noncoding | noncoding | noncoding |
| NM_001370092. 1   | GJB6         | XLOC_172755 | 2161 coding | coding    | coding    | coding    |
| XR_941546. 1      | ZDHHC20      | XLOC_172817 | 5547 coding | coding    | coding    | coding    |
| MSTRG. 164865. 1  |              | XLOC_172981 | 226 coding  | noncoding | noncoding | noncoding |
| MSTRG. 164867. 1  |              | XLOC_172984 | 262 coding  | noncoding | noncoding | noncoding |
| MSTRG. 164872. 1  | SGCG         | XLOC_172986 | 286 coding  | noncoding | noncoding | noncoding |
| XR_001749788. 1   | LOC105370114 | XLOC_172995 | 6305 coding | noncoding | coding    | noncoding |
| MSTRG. 164912. 1  | LOC105370113 | XLOC_173000 | 227 coding  | noncoding | noncoding | noncoding |
| MSTRG. 164936. 1  | SPATA13      | XLOC_173015 | 240 coding  | noncoding | noncoding | noncoding |
| MSTRG. 164928. 1  |              | XLOC_173029 | 297 coding  | noncoding | noncoding | noncoding |
| MSTRG. 165118. 1  | LOC105370117 | XLOC_173033 | 250 coding  | noncoding | noncoding | noncoding |
| MSTRG. 165130. 1  | RNF17        | XLOC_173042 | 245 coding  | noncoding | noncoding | noncoding |
| MSTRG. 165137. 1  | CENPJ        | XLOC_173045 | 259 coding  | noncoding | noncoding | noncoding |
| NR_026730. 1      | TPTE2P1      | XLOC_173046 | 6477 coding | noncoding | coding    | noncoding |
| MSTRG. 165112. 1  | TPTE2P1      | XLOC_173047 | 280 coding  | noncoding | noncoding | noncoding |
| MSTRG. 165139. 1  |              | XLOC_173058 | 310 coding  | noncoding | noncoding | noncoding |
| MSTRG. 165183. 1  | ATP8A2       | XLOC_173074 | 230 coding  | noncoding | noncoding | noncoding |
| NM_001007538. 1   | SHISA2       | XLOC_173080 | 2889 coding | coding    | coding    | coding    |
| MSTRG. 165196. 1  | RNF6         | XLOC_173084 | 252 coding  | noncoding | noncoding | noncoding |
| NM_005288. 4      | GPR12        | XLOC_173103 | 4851 coding | coding    | coding    | coding    |
| MSTRG. 165244. 1  |              | XLOC_173111 | 288 coding  | noncoding | noncoding | noncoding |
| MSTRG. 165271. 1  | LOC105370124 | XLOC_173114 | 234 coding  | noncoding | noncoding | noncoding |
| MSTRG. 165296. 1  |              | XLOC_173136 | 260 coding  | noncoding | noncoding | noncoding |
| MSTRG. 165311. 1  |              | XLOC_173137 | 424 coding  | coding    | noncoding | noncoding |
| MSTRG. 165313. 1  |              | XLOC_173139 | 260 coding  | noncoding | noncoding | noncoding |
| MSTRG. 165327. 3  | MTIF3        | XLOC_173142 | 2347 coding | coding    | coding    | coding    |
| MSTRG. 165316. 1  |              | XLOC_173143 | 261 coding  | noncoding | noncoding | noncoding |
| MSTRG. 165354. 14 | LNx2         | XLOC_173148 | 2569 coding | noncoding | coding    | coding    |
| MSTRG. 165354. 10 | LNx2         | XLOC_173148 | 2605 coding | noncoding | coding    | coding    |
| MSTRG. 165330. 1  |              | XLOC_173152 | 235 coding  | noncoding | noncoding | noncoding |
| MSTRG. 165334. 1  | PLUT         | XLOC_173154 | 269 coding  | noncoding | noncoding | noncoding |
| MSTRG. 165344. 1  | LOC105370132 | XLOC_173160 | 526 coding  | noncoding | noncoding | noncoding |
| MSTRG. 165408. 1  |              | XLOC_173183 | 249 coding  | noncoding | noncoding | noncoding |
| MSTRG. 165430. 1  | MTUS2        | XLOC_173186 | 338 coding  | noncoding | noncoding | noncoding |
| MSTRG. 165443. 1  | MTUS2        | XLOC_173192 | 226 coding  | noncoding | noncoding | noncoding |
| MSTRG. 165448. 1  | MTUS2        | XLOC_173195 | 252 coding  | noncoding | noncoding | noncoding |

|                  |                |             |             |           |           |           |
|------------------|----------------|-------------|-------------|-----------|-----------|-----------|
| MSTRG. 165471. 1 | MTUS2          | XLOC_173207 | 356 coding  | noncoding | noncoding | noncoding |
| MSTRG. 165475. 1 |                | XLOC_173216 | 249 coding  | noncoding | noncoding | noncoding |
| MSTRG. 165533. 1 |                | XLOC_173225 | 280 coding  | noncoding | noncoding | noncoding |
| MSTRG. 165537. 1 | UBL3           | XLOC_173228 | 236 coding  | noncoding | noncoding | noncoding |
| MSTRG. 165490. 1 | LINC00297      | XLOC_173248 | 232 coding  | noncoding | noncoding | noncoding |
| MSTRG. 165680. 1 | KATNAL1        | XLOC_173265 | 316 coding  | noncoding | noncoding | noncoding |
| MSTRG. 165566. 1 |                | XLOC_173289 | 205 coding  | noncoding | noncoding | noncoding |
| MSTRG. 165573. 1 |                | XLOC_173302 | 307 coding  | noncoding | noncoding | noncoding |
| MSTRG. 165656. 1 |                | XLOC_173333 | 290 coding  | noncoding | noncoding | noncoding |
| NM_001349704. 2  | HSPH1          | XLOC_173342 | 4994 coding | coding    | coding    | coding    |
| MSTRG. 165732. 1 |                | XLOC_173348 | 269 coding  | noncoding | noncoding | noncoding |
| MSTRG. 165738. 1 |                | XLOC_173356 | 312 coding  | noncoding | noncoding | noncoding |
| MSTRG. 165743. 1 |                | XLOC_173357 | 292 coding  | noncoding | noncoding | noncoding |
| MSTRG. 166348. 1 | ZAR1L          | XLOC_173371 | 318 coding  | noncoding | noncoding | noncoding |
| NR_047020. 1     | LINC00423      | XLOC_173405 | 1356 coding | noncoding | noncoding | noncoding |
| MSTRG. 165880. 1 | STARD13        | XLOC_173426 | 262 coding  | noncoding | noncoding | noncoding |
| MSTRG. 165905. 1 | LOC102723406   | XLOC_173433 | 212 coding  | noncoding | noncoding | noncoding |
| MSTRG. 165943. 1 | LINC02343      | XLOC_173496 | 271 coding  | noncoding | noncoding | noncoding |
| MSTRG. 165950. 1 | LINC02343      | XLOC_173499 | 277 coding  | noncoding | noncoding | noncoding |
| NM_004734. 5     | DCLK1          | XLOC_173569 | 8468 coding | coding    | coding    | coding    |
| MSTRG. 166048. 1 | CCDC169-SOHLH2 | XLOC_173577 | 374 coding  | noncoding | noncoding | noncoding |
| MSTRG. 166086. 1 | SMAD9          | XLOC_173607 | 218 coding  | noncoding | noncoding | noncoding |
| MSTRG. 166178. 2 | SUPT20H        | XLOC_173613 | 3773 coding | coding    | coding    | coding    |
| MSTRG. 166190. 1 |                | XLOC_173627 | 279 coding  | noncoding | noncoding | noncoding |
| XM_017020356. 1  | POSTN          | XLOC_173630 | 3363 coding | coding    | coding    | coding    |
| MSTRG. 166416. 1 | STOML3         | XLOC_173664 | 242 coding  | noncoding | noncoding | noncoding |
| MSTRG. 166527. 1 |                | XLOC_173695 | 281 coding  | noncoding | noncoding | noncoding |
| MSTRG. 166598. 1 | LINC00598      | XLOC_173709 | 286 coding  | coding    | noncoding | noncoding |
| MSTRG. 166571. 1 |                | XLOC_173716 | 251 coding  | noncoding | noncoding | noncoding |
| MSTRG. 166574. 1 |                | XLOC_173717 | 218 coding  | noncoding | noncoding | noncoding |
| MSTRG. 166627. 1 |                | XLOC_173752 | 287 coding  | noncoding | noncoding | noncoding |
| MSTRG. 166694. 1 | TPTE2P5        | XLOC_173767 | 249 coding  | noncoding | noncoding | noncoding |
| NM_001370332. 1  | ELF1           | XLOC_173773 | 3986 coding | coding    | coding    | coding    |
| MSTRG. 166756. 1 | LOC101929140   | XLOC_173797 | 287 coding  | noncoding | noncoding | noncoding |
| MSTRG. 166736. 1 |                | XLOC_173808 | 258 coding  | noncoding | noncoding | noncoding |
| MSTRG. 166731. 1 |                | XLOC_173810 | 224 coding  | noncoding | noncoding | noncoding |
| MSTRG. 166788. 1 | LINC02341      | XLOC_173855 | 314 coding  | noncoding | noncoding | noncoding |
| MSTRG. 166825. 1 | LINC00428      | XLOC_173868 | 248 coding  | noncoding | noncoding | noncoding |
| XR_001749592. 2  | ENOX1          | XLOC_173900 | 6188 coding | coding    | coding    | coding    |
| MSTRG. 166865. 1 | ENOX1          | XLOC_173907 | 217 coding  | noncoding | noncoding | noncoding |
| MSTRG. 166852. 1 |                | XLOC_173916 | 353 coding  | coding    | noncoding | noncoding |
| MSTRG. 166934. 2 | LOC107984576   | XLOC_173927 | 2485 coding | coding    | coding    | coding    |
| MSTRG. 167001. 1 |                | XLOC_173960 | 231 coding  | noncoding | noncoding | noncoding |

|                  |              |             |             |           |           |           |
|------------------|--------------|-------------|-------------|-----------|-----------|-----------|
| MSTRG. 167011. 1 | LINC00407    | XLOC_173961 | 230 coding  | noncoding | noncoding | noncoding |
| MSTRG. 167006. 1 |              | XLOC_173965 | 293 coding  | noncoding | noncoding | noncoding |
| MSTRG. 167016. 1 |              | XLOC_173966 | 217 coding  | noncoding | noncoding | noncoding |
| MSTRG. 167026. 1 | LOC105370187 | XLOC_173971 | 325 coding  | noncoding | noncoding | noncoding |
| MSTRG. 167034. 1 | LOC107984596 | XLOC_173981 | 244 coding  | noncoding | noncoding | noncoding |
| MSTRG. 167030. 1 |              | XLOC_173982 | 398 coding  | noncoding | noncoding | noncoding |
| MSTRG. 167040. 1 | LOC101929259 | XLOC_173984 | 417 coding  | noncoding | noncoding | noncoding |
| MSTRG. 167127. 6 | TPT1         | XLOC_173988 | 1765 coding | coding    | coding    | coding    |
| MSTRG. 167127. 4 | TPT1         | XLOC_173988 | 2073 coding | coding    | coding    | coding    |
| MSTRG. 167127. 3 | TPT1         | XLOC_173988 | 2072 coding | coding    | coding    | coding    |
| MSTRG. 167127. 2 | TPT1         | XLOC_173988 | 1781 coding | coding    | coding    | coding    |
| NM_001286807. 2  | SLC25A30     | XLOC_173996 | 3721 coding | coding    | coding    | coding    |
| XM_006719793. 4  | SLC25A30     | XLOC_173996 | 1702 coding | coding    | coding    | coding    |
| MSTRG. 167078. 1 |              | XLOC_174005 | 246 coding  | noncoding | noncoding | noncoding |
| NM_198849. 3     | SIAH3        | XLOC_174010 | 7075 coding | coding    | coding    | coding    |
| MSTRG. 167187. 1 | LRRRC63      | XLOC_174046 | 225 coding  | noncoding | noncoding | noncoding |
| MSTRG. 167211. 1 |              | XLOC_174071 | 234 coding  | noncoding | noncoding | noncoding |
| MSTRG. 167256. 1 |              | XLOC_174089 | 292 coding  | noncoding | noncoding | noncoding |
| MSTRG. 167264. 1 |              | XLOC_174095 | 316 coding  | noncoding | noncoding | noncoding |
| MSTRG. 167268. 1 |              | XLOC_174097 | 309 coding  | noncoding | noncoding | noncoding |
| MSTRG. 167503. 1 |              | XLOC_174168 | 300 coding  | noncoding | noncoding | noncoding |
| MSTRG. 167527. 1 | KPNA3        | XLOC_174174 | 289 coding  | noncoding | noncoding | noncoding |
| MSTRG. 167517. 1 | SPRYD7       | XLOC_174185 | 310 coding  | noncoding | noncoding | noncoding |
| MSTRG. 168773. 1 |              | XLOC_174192 | 276 coding  | noncoding | noncoding | noncoding |
| MSTRG. 168788. 1 | DLEU1        | XLOC_174207 | 280 coding  | noncoding | noncoding | noncoding |
| MSTRG. 167581. 1 |              | XLOC_174410 | 309 coding  | noncoding | noncoding | noncoding |
| MSTRG. 167606. 1 |              | XLOC_174426 | 243 coding  | noncoding | noncoding | noncoding |
| MSTRG. 167619. 1 | TPTE2P2      | XLOC_174432 | 251 coding  | noncoding | noncoding | noncoding |
| MSTRG. 167621. 1 | TPTE2P2      | XLOC_174433 | 296 coding  | noncoding | noncoding | noncoding |
| MSTRG. 167615. 1 |              | XLOC_174437 | 269 coding  | noncoding | noncoding | noncoding |
| MSTRG. 167626. 1 | THSD1        | XLOC_174439 | 293 coding  | noncoding | noncoding | noncoding |
| MSTRG. 167663. 1 | TPTE2P3      | XLOC_174449 | 208 coding  | noncoding | noncoding | noncoding |
| MSTRG. 167660. 1 |              | XLOC_174452 | 274 coding  | noncoding | noncoding | noncoding |
| MSTRG. 167720. 1 |              | XLOC_174470 | 320 coding  | noncoding | coding    | noncoding |
| MSTRG. 167748. 1 |              | XLOC_174485 | 219 coding  | noncoding | noncoding | noncoding |
| MSTRG. 167756. 1 |              | XLOC_174490 | 534 coding  | noncoding | noncoding | noncoding |
| MSTRG. 167771. 1 |              | XLOC_174498 | 330 coding  | coding    | noncoding | noncoding |
| MSTRG. 167774. 1 |              | XLOC_174501 | 232 coding  | noncoding | noncoding | noncoding |
| MSTRG. 167790. 1 |              | XLOC_174508 | 272 coding  | noncoding | noncoding | noncoding |
| MSTRG. 167831. 1 | LOC105370214 | XLOC_174523 | 226 coding  | noncoding | noncoding | noncoding |
| MSTRG. 167836. 1 | LOC105370214 | XLOC_174525 | 227 coding  | noncoding | noncoding | noncoding |
| MSTRG. 167817. 1 |              | XLOC_174534 | 223 coding  | noncoding | noncoding | noncoding |
| MSTRG. 167823. 1 |              | XLOC_174537 | 241 coding  | noncoding | noncoding | noncoding |

|                  |              |             |              |           |           |           |
|------------------|--------------|-------------|--------------|-----------|-----------|-----------|
| MSTRG. 167872. 1 |              | XLOC_174544 | 291 coding   | noncoding | noncoding | noncoding |
| MSTRG. 167883. 1 |              | XLOC_174550 | 217 coding   | noncoding | noncoding | noncoding |
| MSTRG. 167888. 1 |              | XLOC_174558 | 270 coding   | noncoding | noncoding | noncoding |
| MSTRG. 167900. 1 |              | XLOC_174560 | 267 coding   | noncoding | noncoding | noncoding |
| MSTRG. 167934. 1 | LOC105370219 | XLOC_174578 | 281 coding   | noncoding | noncoding | noncoding |
| XM_011535258. 2  | DIAPH3       | XLOC_174595 | 4021 coding  | coding    | coding    | coding    |
| MSTRG. 168005. 1 | DIAPH3       | XLOC_174596 | 316 coding   | noncoding | noncoding | noncoding |
| MSTRG. 167985. 1 | LINC00434    | XLOC_174611 | 320 coding   | noncoding | noncoding | noncoding |
| MSTRG. 168035. 1 |              | XLOC_174622 | 258 coding   | noncoding | noncoding | noncoding |
| MSTRG. 168093. 1 |              | XLOC_174656 | 287 coding   | noncoding | noncoding | noncoding |
| MSTRG. 168111. 1 | LINC00448    | XLOC_174663 | 212 coding   | noncoding | noncoding | noncoding |
| MSTRG. 168128. 1 |              | XLOC_174678 | 264 coding   | coding    | noncoding | noncoding |
| MSTRG. 168144. 1 |              | XLOC_174687 | 294 coding   | noncoding | noncoding | noncoding |
| MSTRG. 168168. 1 |              | XLOC_174700 | 299 coding   | noncoding | noncoding | noncoding |
| MSTRG. 168169. 1 |              | XLOC_174701 | 281 coding   | coding    | noncoding | noncoding |
| MSTRG. 168186. 1 |              | XLOC_174710 | 243 coding   | noncoding | noncoding | noncoding |
| MSTRG. 168189. 1 |              | XLOC_174712 | 300 coding   | coding    | noncoding | noncoding |
| MSTRG. 168192. 1 |              | XLOC_174713 | 399 coding   | noncoding | noncoding | noncoding |
| NM_203487. 3     | PCDH9        | XLOC_174728 | 6227 coding  | coding    | coding    | coding    |
| MSTRG. 168405. 1 | PCDH9        | XLOC_174736 | 250 coding   | noncoding | noncoding | noncoding |
| MSTRG. 168408. 1 | PCDH9        | XLOC_174738 | 559 coding   | noncoding | noncoding | noncoding |
| MSTRG. 168254. 1 |              | XLOC_174757 | 262 coding   | noncoding | noncoding | noncoding |
| MSTRG. 168269. 1 |              | XLOC_174765 | 287 coding   | noncoding | noncoding | noncoding |
| NR_038878. 1     | LINC00550    | XLOC_174774 | 3434 coding  | noncoding | noncoding | noncoding |
| MSTRG. 168305. 1 |              | XLOC_174782 | 360 coding   | noncoding | noncoding | noncoding |
| MSTRG. 168309. 1 |              | XLOC_174784 | 251 coding   | noncoding | noncoding | noncoding |
| MSTRG. 168327. 1 | KLHL1        | XLOC_174787 | 284 coding   | noncoding | noncoding | noncoding |
| MSTRG. 168311. 1 |              | XLOC_174793 | 256 coding   | noncoding | noncoding | noncoding |
| MSTRG. 168348. 1 |              | XLOC_174805 | 201 coding   | noncoding | noncoding | noncoding |
| NM_001366712. 1  | DACH1        | XLOC_174821 | 5401 coding  | coding    | coding    | coding    |
| MSTRG. 168446. 1 |              | XLOC_174847 | 446 coding   | noncoding | noncoding | noncoding |
| MSTRG. 168481. 1 |              | XLOC_174875 | 234 coding   | noncoding | noncoding | noncoding |
| MSTRG. 168485. 1 |              | XLOC_174876 | 334 coding   | noncoding | noncoding | noncoding |
| MSTRG. 168491. 1 |              | XLOC_174880 | 297 coding   | noncoding | noncoding | noncoding |
| MSTRG. 168494. 1 |              | XLOC_174882 | 232 coding   | noncoding | noncoding | noncoding |
| XM_017020385. 1  | KLF12        | XLOC_174898 | 10872 coding | coding    | coding    | coding    |
| MSTRG. 169035. 1 | KLF12        | XLOC_174903 | 289 coding   | noncoding | noncoding | noncoding |
| MSTRG. 168649. 1 |              | XLOC_174982 | 261 coding   | coding    | noncoding | noncoding |
| MSTRG. 168654. 1 |              | XLOC_174985 | 276 coding   | noncoding | noncoding | noncoding |
| MSTRG. 169139. 1 | COMMD6       | XLOC_175000 | 283 coding   | noncoding | noncoding | noncoding |
| MSTRG. 169478. 1 | MYCBP2       | XLOC_175091 | 259 coding   | noncoding | noncoding | noncoding |
| MSTRG. 169279. 1 |              | XLOC_175140 | 247 coding   | coding    | noncoding | noncoding |
| MSTRG. 169280. 1 |              | XLOC_175141 | 308 coding   | noncoding | noncoding | noncoding |

|                  |              |             |             |           |           |           |
|------------------|--------------|-------------|-------------|-----------|-----------|-----------|
| MSTRG. 169336. 1 | RNF219-AS1   | XLOC_175154 | 279 coding  | noncoding | noncoding | noncoding |
| MSTRG. 169340. 1 | RNF219-AS1   | XLOC_175158 | 261 coding  | noncoding | noncoding | noncoding |
| NM_006237. 4     | POU4F1       | XLOC_175163 | 4539 coding | coding    | coding    | coding    |
| MSTRG. 169294. 1 |              | XLOC_175168 | 294 coding  | noncoding | noncoding | noncoding |
| XM_005266497. 2  | RBM26        | XLOC_175182 | 6382 coding | coding    | coding    | coding    |
| MSTRG. 169358. 1 |              | XLOC_175212 | 245 coding  | noncoding | noncoding | noncoding |
| MSTRG. 169390. 1 | LINC00382    | XLOC_175224 | 452 coding  | noncoding | noncoding | noncoding |
| MSTRG. 169381. 1 |              | XLOC_175225 | 218 coding  | noncoding | noncoding | noncoding |
| NM_001318537. 1  | SPRY2        | XLOC_175232 | 2708 coding | coding    | coding    | coding    |
| MSTRG. 169419. 1 |              | XLOC_175240 | 325 coding  | noncoding | noncoding | noncoding |
| MSTRG. 169428. 1 |              | XLOC_175248 | 269 coding  | noncoding | noncoding | noncoding |
| MSTRG. 169609. 1 |              | XLOC_175292 | 269 coding  | noncoding | noncoding | noncoding |
| MSTRG. 169626. 1 | LOC105370284 | XLOC_175302 | 229 coding  | noncoding | noncoding | noncoding |
| MSTRG. 169618. 1 |              | XLOC_175303 | 210 coding  | noncoding | noncoding | noncoding |
| MSTRG. 169635. 1 |              | XLOC_175308 | 306 coding  | coding    | noncoding | noncoding |
| MSTRG. 169656. 1 |              | XLOC_175320 | 247 coding  | noncoding | noncoding | noncoding |
| MSTRG. 169673. 1 |              | XLOC_175326 | 290 coding  | noncoding | noncoding | noncoding |
| MSTRG. 169683. 1 | LOC105370286 | XLOC_175329 | 324 coding  | noncoding | noncoding | noncoding |
| NM_052910. 2     | SLITRK1      | XLOC_175331 | 5189 coding | coding    | coding    | coding    |
| MSTRG. 169709. 1 |              | XLOC_175372 | 206 coding  | noncoding | noncoding | noncoding |
| MSTRG. 169725. 1 | LOC105370291 | XLOC_175379 | 294 coding  | noncoding | noncoding | noncoding |
| MSTRG. 169738. 1 | LINC00351    | XLOC_175385 | 309 coding  | noncoding | noncoding | noncoding |
| MSTRG. 169829. 1 |              | XLOC_175434 | 242 coding  | noncoding | noncoding | noncoding |
| MSTRG. 169837. 1 |              | XLOC_175437 | 222 coding  | noncoding | noncoding | noncoding |
| MSTRG. 169880. 1 | MIR4500HG    | XLOC_175445 | 510 coding  | noncoding | noncoding | noncoding |
| MSTRG. 169866. 1 | LOC105370304 | XLOC_175458 | 235 coding  | noncoding | noncoding | noncoding |
| MSTRG. 169924. 1 |              | XLOC_175473 | 231 coding  | noncoding | noncoding | noncoding |
| MSTRG. 169926. 1 |              | XLOC_175475 | 258 coding  | noncoding | noncoding | noncoding |
| MSTRG. 169931. 1 |              | XLOC_175476 | 346 coding  | noncoding | noncoding | noncoding |
| MSTRG. 169957. 1 |              | XLOC_175493 | 272 coding  | noncoding | noncoding | noncoding |
| MSTRG. 169968. 1 |              | XLOC_175500 | 295 coding  | noncoding | noncoding | noncoding |
| MSTRG. 169986. 1 | LINC01049    | XLOC_175507 | 307 coding  | noncoding | noncoding | noncoding |
| MSTRG. 169994. 1 | LOC107984572 | XLOC_175511 | 293 coding  | noncoding | noncoding | noncoding |
| MSTRG. 169998. 1 |              | XLOC_175513 | 280 coding  | coding    | noncoding | noncoding |
| MSTRG. 170074. 1 | GPC5         | XLOC_175538 | 309 coding  | noncoding | noncoding | noncoding |
| MSTRG. 170076. 1 | GPC5         | XLOC_175539 | 272 coding  | noncoding | noncoding | noncoding |
| MSTRG. 170098. 1 | GPC5         | XLOC_175552 | 241 coding  | noncoding | noncoding | noncoding |
| MSTRG. 170109. 1 | GPC5         | XLOC_175558 | 355 coding  | coding    | noncoding | noncoding |
| MSTRG. 170162. 1 | GPC6         | XLOC_175589 | 207 coding  | noncoding | noncoding | noncoding |
| NM_001922. 5     | DCT          | XLOC_175598 | 5074 coding | coding    | coding    | coding    |
| NM_005845. 4     | ABCC4        | XLOC_175626 | 5856 coding | coding    | coding    | coding    |
| MSTRG. 170238. 1 | ABCC4        | XLOC_175629 | 283 coding  | noncoding | noncoding | noncoding |
| MSTRG. 170214. 1 |              | XLOC_175633 | 303 coding  | noncoding | noncoding | noncoding |

|                |              |             |              |           |           |           |
|----------------|--------------|-------------|--------------|-----------|-----------|-----------|
| MSTRG.170222.1 | CLDN10       | XLOC_175635 | 251 coding   | noncoding | noncoding | noncoding |
| NM_198968.4    | DZIP1        | XLOC_175639 | 7491 coding  | coding    | coding    | coding    |
| MSTRG.170217.1 |              | XLOC_175641 | 276 coding   | noncoding | noncoding | noncoding |
| MSTRG.170319.1 | UGGT2        | XLOC_175651 | 253 coding   | noncoding | noncoding | noncoding |
| MSTRG.170333.1 | UGGT2        | XLOC_175659 | 257 coding   | noncoding | noncoding | noncoding |
| MSTRG.170284.1 | HS6ST3       | XLOC_175666 | 298 coding   | noncoding | noncoding | noncoding |
| MSTRG.170297.1 | HS6ST3       | XLOC_175671 | 317 coding   | noncoding | noncoding | noncoding |
| MSTRG.170298.1 | HS6ST3       | XLOC_175672 | 218 coding   | noncoding | noncoding | noncoding |
| MSTRG.170267.1 |              | XLOC_175677 | 285 coding   | noncoding | noncoding | noncoding |
| MSTRG.170271.1 |              | XLOC_175678 | 298 coding   | noncoding | noncoding | noncoding |
| MSTRG.170340.1 |              | XLOC_175692 | 382 coding   | noncoding | noncoding | noncoding |
| MSTRG.170370.1 |              | XLOC_175701 | 269 coding   | noncoding | noncoding | noncoding |
| XR_931663.2    | LOC105370324 | XLOC_175705 | 4233 coding  | noncoding | noncoding | noncoding |
| MSTRG.170433.1 | LOC105370328 | XLOC_175719 | 272 coding   | noncoding | noncoding | noncoding |
| MSTRG.170445.1 | FARP1        | XLOC_175727 | 289 coding   | noncoding | noncoding | noncoding |
| XM_024449426.1 | STK24        | XLOC_175735 | 2588 coding  | coding    | coding    | coding    |
| MSTRG.170427.1 | SLC15A1      | XLOC_175754 | 280 coding   | noncoding | noncoding | noncoding |
| XM_017020405.2 | GPR183       | XLOC_175786 | 1992 coding  | coding    | coding    | coding    |
| NM_004951.5    | GPR183       | XLOC_175786 | 1685 coding  | coding    | coding    | coding    |
| MSTRG.170484.1 |              | XLOC_175790 | 264 coding   | noncoding | noncoding | noncoding |
| MSTRG.170486.1 |              | XLOC_175791 | 248 coding   | noncoding | noncoding | noncoding |
| MSTRG.170603.1 | LOC101927437 | XLOC_175810 | 300 coding   | noncoding | noncoding | noncoding |
| MSTRG.170540.1 |              | XLOC_175814 | 266 coding   | noncoding | noncoding | noncoding |
| MSTRG.170614.1 | TMTC4        | XLOC_175828 | 279 coding   | noncoding | noncoding | noncoding |
| MSTRG.170622.1 | NALCN-AS1    | XLOC_175833 | 432 coding   | noncoding | noncoding | noncoding |
| MSTRG.170634.1 | NALCN        | XLOC_175841 | 473 coding   | noncoding | noncoding | noncoding |
| MSTRG.170636.1 | NALCN        | XLOC_175842 | 248 coding   | noncoding | noncoding | noncoding |
| MSTRG.170645.1 | NALCN        | XLOC_175848 | 259 coding   | noncoding | noncoding | noncoding |
| MSTRG.170660.1 | ITGBL1       | XLOC_175851 | 262 coding   | coding    | noncoding | noncoding |
| MSTRG.170664.1 | ITGBL1       | XLOC_175854 | 433 coding   | noncoding | noncoding | noncoding |
| MSTRG.170682.1 | FGF14        | XLOC_175862 | 234 coding   | noncoding | noncoding | noncoding |
| MSTRG.170689.1 | FGF14        | XLOC_175867 | 412 coding   | coding    | noncoding | noncoding |
| MSTRG.170769.1 | POGLUT2      | XLOC_175879 | 475 coding   | noncoding | noncoding | noncoding |
| MSTRG.170729.1 |              | XLOC_175893 | 265 coding   | noncoding | noncoding | noncoding |
| MSTRG.170737.1 |              | XLOC_175899 | 227 coding   | noncoding | noncoding | noncoding |
| MSTRG.170803.1 |              | XLOC_175922 | 318 coding   | noncoding | noncoding | noncoding |
| MSTRG.170883.1 | LOC107984626 | XLOC_175953 | 259 coding   | noncoding | noncoding | noncoding |
| MSTRG.170876.1 | LOC105370346 | XLOC_175957 | 303 coding   | noncoding | noncoding | noncoding |
| NM_001080396.3 | FAM155A      | XLOC_175975 | 9264 coding  | noncoding | coding    | coding    |
| MSTRG.170943.1 | FAM155A      | XLOC_175976 | 280 coding   | noncoding | noncoding | noncoding |
| XR_001750003.2 | LOC107984581 | XLOC_175993 | 13330 coding | noncoding | noncoding | noncoding |
| MSTRG.171079.1 | MYO16        | XLOC_176041 | 295 coding   | noncoding | noncoding | noncoding |
| MSTRG.171082.1 | MYO16        | XLOC_176044 | 259 coding   | noncoding | noncoding | noncoding |

|                  |              |             |              |           |           |           |
|------------------|--------------|-------------|--------------|-----------|-----------|-----------|
| MSTRG.171115.1   |              | XLOC_176115 | 251 coding   | noncoding | noncoding | noncoding |
| XM_011521048.2   | COL4A1       | XLOC_176124 | 14378 coding | coding    | coding    | coding    |
| MSTRG.171167.1   |              | XLOC_176134 | 444 coding   | noncoding | noncoding | noncoding |
| MSTRG.171184.1   |              | XLOC_176168 | 317 coding   | noncoding | noncoding | noncoding |
| MSTRG.171391.1   | TEX29        | XLOC_176199 | 248 coding   | noncoding | noncoding | noncoding |
| MSTRG.171331.1   |              | XLOC_176208 | 256 coding   | noncoding | noncoding | noncoding |
| MSTRG.171395.1   | TUBGCP3      | XLOC_176232 | 388 coding   | noncoding | noncoding | noncoding |
| MSTRG.171398.1   | TUBGCP3      | XLOC_176235 | 253 coding   | noncoding | noncoding | noncoding |
| MSTRG.171538.1   |              | XLOC_176317 | 400 coding   | noncoding | noncoding | noncoding |
| MSTRG.171586.1   |              | XLOC_176329 | 265 coding   | noncoding | noncoding | noncoding |
| MSTRG.171589.1   |              | XLOC_176332 | 315 coding   | noncoding | noncoding | noncoding |
| NM_001145442.1   | POTEM        | XLOC_176333 | 6666 coding  | coding    | coding    | coding    |
| NR_122112.1      | DUXAP9       | XLOC_176335 | 1401 coding  | noncoding | noncoding | noncoding |
| MSTRG.171622.1   |              | XLOC_176339 | 304 coding   | noncoding | coding    | noncoding |
| MSTRG.171625.1   |              | XLOC_176341 | 283 coding   | noncoding | noncoding | noncoding |
| MSTRG.171634.1   |              | XLOC_176348 | 230 coding   | noncoding | noncoding | noncoding |
| MSTRG.171638.1   |              | XLOC_176350 | 299 coding   | coding    | noncoding | noncoding |
| MSTRG.171645.1   | OR4N2        | XLOC_176356 | 299 coding   | noncoding | noncoding | noncoding |
| MSTRG.171657.1   |              | XLOC_176367 | 286 coding   | noncoding | noncoding | noncoding |
| MSTRG.171658.1   |              | XLOC_176368 | 295 coding   | noncoding | noncoding | noncoding |
| MSTRG.171668.1   |              | XLOC_176389 | 225 coding   | noncoding | noncoding | noncoding |
| MSTRG.171743.2   | TEP1         | XLOC_176399 | 8225 coding  | coding    | coding    | noncoding |
| MSTRG.171696.1   |              | XLOC_176400 | 206 coding   | noncoding | noncoding | noncoding |
| MSTRG.171707.1   |              | XLOC_176407 | 265 coding   | noncoding | noncoding | noncoding |
| MSTRG.171729.1   |              | XLOC_176418 | 248 coding   | noncoding | noncoding | noncoding |
| MSTRG.171749.1   |              | XLOC_176431 | 298 coding   | noncoding | noncoding | noncoding |
| MSTRG.171753.1   | LOC100507513 | XLOC_176433 | 284 coding   | noncoding | noncoding | noncoding |
| NM_014579.4      | SLC39A2      | XLOC_176439 | 1376 coding  | coding    | coding    | coding    |
| MSTRG.171827.9   | CHD8         | XLOC_176455 | 1244 coding  | noncoding | noncoding | noncoding |
| MSTRG.171836.2   | RAB2B        | XLOC_176457 | 2465 coding  | coding    | noncoding | coding    |
| MSTRG.171816.1   |              | XLOC_176459 | 250 coding   | noncoding | noncoding | noncoding |
| MSTRG.171817.1   |              | XLOC_176461 | 287 coding   | noncoding | noncoding | noncoding |
| TRAV22           | TRAV22       | XLOC_176462 | 331 coding   | coding    | noncoding | noncoding |
| MSTRG.172178.125 | TRAJ9        | XLOC_176462 | 605 coding   | coding    | coding    | coding    |
| MSTRG.172209.1   | TRAV1-1      | XLOC_176475 | 257 coding   | noncoding | noncoding | noncoding |
| MSTRG.171865.1   | ABHD4        | XLOC_176506 | 233 coding   | noncoding | noncoding | noncoding |
| MSTRG.171861.1   |              | XLOC_176509 | 231 coding   | noncoding | noncoding | noncoding |
| MSTRG.171914.1   | RBM23        | XLOC_176524 | 7899 coding  | coding    | coding    | noncoding |
| NR_120599.1      | PRMT5-AS1    | XLOC_176525 | 2104 coding  | coding    | coding    | noncoding |
| MSTRG.171941.3   | LOC107984665 | XLOC_176535 | 4697 coding  | coding    | coding    | coding    |
| MSTRG.171934.1   | SLC7A8       | XLOC_176545 | 417 coding   | noncoding | noncoding | coding    |
| MSTRG.171974.1   | MYH7         | XLOC_176560 | 265 coding   | noncoding | coding    | noncoding |
| MSTRG.172006.1   | ZFHX2        | XLOC_176565 | 260 coding   | noncoding | noncoding | noncoding |

|                |              |             |             |           |           |           |
|----------------|--------------|-------------|-------------|-----------|-----------|-----------|
| MSTRG.171991.1 |              | XLOC_176570 | 320 coding  | noncoding | noncoding | noncoding |
| MSTRG.172114.1 |              | XLOC_176621 | 257 coding  | noncoding | noncoding | noncoding |
| MSTRG.172120.1 | LINC02286    | XLOC_176633 | 262 coding  | coding    | noncoding | noncoding |
| MSTRG.172171.1 |              | XLOC_176655 | 290 coding  | noncoding | noncoding | noncoding |
| NR_147061.1    | LINC02588    | XLOC_176660 | 2252 coding | noncoding | noncoding | noncoding |
| MSTRG.172316.1 | LOC728755    | XLOC_176676 | 266 coding  | noncoding | noncoding | noncoding |
| MSTRG.172337.1 |              | XLOC_176681 | 716 coding  | noncoding | coding    | noncoding |
| MSTRG.172339.1 |              | XLOC_176689 | 256 coding  | noncoding | noncoding | noncoding |
| MSTRG.172353.1 | LOC107984684 | XLOC_176695 | 304 coding  | noncoding | noncoding | noncoding |
| MSTRG.172356.1 |              | XLOC_176697 | 298 coding  | noncoding | noncoding | noncoding |
| MSTRG.172395.1 | PRKD1        | XLOC_176719 | 314 coding  | noncoding | noncoding | noncoding |
| MSTRG.172391.1 |              | XLOC_176725 | 510 coding  | noncoding | noncoding | noncoding |
| MSTRG.172416.1 |              | XLOC_176731 | 348 coding  | noncoding | noncoding | noncoding |
| MSTRG.172426.1 |              | XLOC_176757 | 515 coding  | noncoding | noncoding | noncoding |
| MSTRG.172575.1 | LOC105370438 | XLOC_176783 | 235 coding  | noncoding | noncoding | noncoding |
| MSTRG.172501.1 |              | XLOC_176797 | 257 coding  | noncoding | noncoding | noncoding |
| NM_001173.3    | ARHGAP5      | XLOC_176800 | 9586 coding | coding    | coding    | coding    |
| MSTRG.172665.1 | AKAP6        | XLOC_176817 | 222 coding  | noncoding | noncoding | noncoding |
| MSTRG.172673.1 | AKAP6        | XLOC_176821 | 293 coding  | noncoding | noncoding | noncoding |
| MSTRG.172565.1 |              | XLOC_176829 | 260 coding  | noncoding | noncoding | noncoding |
| MSTRG.172724.1 | NPAS3        | XLOC_176834 | 238 coding  | noncoding | noncoding | noncoding |
| MSTRG.172572.1 |              | XLOC_176854 | 350 coding  | noncoding | noncoding | noncoding |
| MSTRG.172785.1 | LOC102724945 | XLOC_176880 | 208 coding  | noncoding | noncoding | noncoding |
| MSTRG.172790.1 |              | XLOC_176888 | 311 coding  | noncoding | noncoding | noncoding |
| MSTRG.172792.1 |              | XLOC_176890 | 396 coding  | coding    | noncoding | noncoding |
| MSTRG.172808.1 |              | XLOC_176895 | 406 coding  | noncoding | noncoding | noncoding |
| XM_017021615.2 | SRP54        | XLOC_176906 | 2102 coding | coding    | coding    | coding    |
| NM_001282233.1 | PSMA6        | XLOC_176909 | 979 coding  | coding    | coding    | coding    |
| MSTRG.172855.1 |              | XLOC_176915 | 288 coding  | noncoding | noncoding | noncoding |
| MSTRG.172857.1 |              | XLOC_176916 | 246 coding  | noncoding | noncoding | noncoding |
| MSTRG.172883.1 |              | XLOC_176935 | 676 coding  | coding    | noncoding | noncoding |
| NM_001195296.2 | MIPOL1       | XLOC_176973 | 7351 coding | noncoding | coding    | coding    |
| XM_017021019.1 | MIPOL1       | XLOC_176973 | 7650 coding | noncoding | coding    | coding    |
| MSTRG.172971.1 | MIPOL1       | XLOC_176974 | 258 coding  | noncoding | noncoding | noncoding |
| MSTRG.172986.1 | MIPOL1       | XLOC_176978 | 298 coding  | noncoding | noncoding | noncoding |
| MSTRG.173005.1 | TTC6         | XLOC_176987 | 303 coding  | noncoding | noncoding | noncoding |
| MSTRG.172968.1 |              | XLOC_176992 | 226 coding  | noncoding | noncoding | noncoding |
| MSTRG.173098.1 | LINC00639    | XLOC_177044 | 269 coding  | noncoding | noncoding | noncoding |
| MSTRG.173106.1 |              | XLOC_177060 | 832 coding  | noncoding | noncoding | noncoding |
| NM_001354154.2 | MIA2         | XLOC_177066 | 3961 coding | noncoding | coding    | coding    |
| MSTRG.173319.1 | MIA2         | XLOC_177067 | 269 coding  | noncoding | noncoding | noncoding |
| MSTRG.173168.1 | LINC02315    | XLOC_177108 | 322 coding  | noncoding | noncoding | noncoding |
| MSTRG.173176.1 | LINC02315    | XLOC_177113 | 229 coding  | noncoding | noncoding | noncoding |

|                   |              |             |             |           |           |           |
|-------------------|--------------|-------------|-------------|-----------|-----------|-----------|
| MSTRG. 173209. 1  |              | XLOC_177131 | 208 coding  | noncoding | noncoding | noncoding |
| MSTRG. 173210. 1  |              | XLOC_177132 | 240 coding  | noncoding | noncoding | noncoding |
| MSTRG. 173216. 1  |              | XLOC_177137 | 225 coding  | noncoding | noncoding | noncoding |
| MSTRG. 173217. 1  |              | XLOC_177138 | 247 coding  | noncoding | noncoding | noncoding |
| MSTRG. 173235. 1  |              | XLOC_177148 | 296 coding  | coding    | noncoding | noncoding |
| MSTRG. 173236. 1  |              | XLOC_177149 | 365 coding  | noncoding | noncoding | noncoding |
| MSTRG. 173239. 1  |              | XLOC_177151 | 319 coding  | noncoding | noncoding | noncoding |
| MSTRG. 173255. 1  |              | XLOC_177159 | 299 coding  | noncoding | noncoding | noncoding |
| MSTRG. 173269. 1  |              | XLOC_177166 | 289 coding  | noncoding | noncoding | noncoding |
| MSTRG. 173277. 1  | LINC02307    | XLOC_177168 | 348 coding  | noncoding | noncoding | noncoding |
| MSTRG. 173283. 1  |              | XLOC_177171 | 314 coding  | noncoding | noncoding | noncoding |
| MSTRG. 173294. 1  | LINC02277    | XLOC_177174 | 270 coding  | noncoding | noncoding | noncoding |
| MSTRG. 173300. 1  |              | XLOC_177180 | 218 coding  | noncoding | noncoding | noncoding |
| MSTRG. 173302. 1  |              | XLOC_177181 | 632 coding  | noncoding | noncoding | noncoding |
| MSTRG. 173305. 1  |              | XLOC_177183 | 256 coding  | noncoding | noncoding | noncoding |
| MSTRG. 173310. 1  |              | XLOC_177184 | 318 coding  | coding    | noncoding | noncoding |
| MSTRG. 173312. 1  |              | XLOC_177186 | 236 coding  | noncoding | noncoding | noncoding |
| MSTRG. 173422. 1  |              | XLOC_177206 | 224 coding  | noncoding | noncoding | noncoding |
| MSTRG. 173427. 1  | LOC105370476 | XLOC_177210 | 315 coding  | noncoding | noncoding | noncoding |
| MSTRG. 173412. 1  |              | XLOC_177214 | 298 coding  | noncoding | noncoding | noncoding |
| MSTRG. 173423. 1  |              | XLOC_177217 | 281 coding  | noncoding | noncoding | noncoding |
| MSTRG. 173434. 1  | LOC105370478 | XLOC_177219 | 297 coding  | noncoding | noncoding | noncoding |
| MSTRG. 173441. 1  |              | XLOC_177224 | 329 coding  | noncoding | noncoding | noncoding |
| MSTRG. 173476. 1  | LOC105370481 | XLOC_177231 | 448 coding  | noncoding | noncoding | noncoding |
| MSTRG. 173515. 1  |              | XLOC_177252 | 315 coding  | coding    | noncoding | noncoding |
| MSTRG. 173516. 1  |              | XLOC_177253 | 309 coding  | coding    | noncoding | noncoding |
| MSTRG. 173517. 1  |              | XLOC_177254 | 313 coding  | noncoding | noncoding | noncoding |
| MSTRG. 173570. 1  |              | XLOC_177268 | 360 coding  | noncoding | noncoding | noncoding |
| MSTRG. 173583. 1  | LOC105378178 | XLOC_177271 | 283 coding  | noncoding | noncoding | noncoding |
| MSTRG. 173599. 1  | LOC105378178 | XLOC_177281 | 244 coding  | noncoding | noncoding | noncoding |
| MSTRG. 173607. 1  | LOC105378178 | XLOC_177287 | 244 coding  | noncoding | noncoding | noncoding |
| MSTRG. 173614. 2  | RN7SL1       | XLOC_177292 | 269 coding  | noncoding | noncoding | noncoding |
| MSTRG. 173614. 8  | RN7SL1       | XLOC_177292 | 257 coding  | noncoding | noncoding | noncoding |
| MSTRG. 173628. 5  | POLE2        | XLOC_177300 | 719 coding  | noncoding | noncoding | noncoding |
| MSTRG. 173678. 2  | NEMF         | XLOC_177306 | 870 coding  | noncoding | noncoding | noncoding |
| MSTRG. 173678. 9  | NEMF         | XLOC_177306 | 336 coding  | noncoding | noncoding | noncoding |
| MSTRG. 173678. 18 | LOC105378179 | XLOC_177306 | 559 coding  | noncoding | noncoding | noncoding |
| MSTRG. 173641. 1  |              | XLOC_177324 | 254 coding  | noncoding | noncoding | noncoding |
| NM_015915. 4      | ATL1         | XLOC_177331 | 2647 coding | coding    | coding    | coding    |
| MSTRG. 173670. 1  |              | XLOC_177335 | 290 coding  | noncoding | noncoding | noncoding |
| MSTRG. 173736. 1  | LOC400212    | XLOC_177349 | 278 coding  | noncoding | noncoding | noncoding |
| MSTRG. 173733. 1  |              | XLOC_177350 | 239 coding  | noncoding | noncoding | noncoding |
| MSTRG. 173740. 1  |              | XLOC_177359 | 272 coding  | noncoding | noncoding | noncoding |

|                |              |             |              |           |           |           |
|----------------|--------------|-------------|--------------|-----------|-----------|-----------|
| MSTRG.173816.1 |              | XLOC_177382 | 223 coding   | noncoding | noncoding | noncoding |
| MSTRG.173848.1 | FRMD6        | XLOC_177385 | 213 coding   | noncoding | noncoding | noncoding |
| MSTRG.173852.1 | FRMD6        | XLOC_177387 | 244 coding   | noncoding | noncoding | noncoding |
| NM_000953.3    | PTGDR        | XLOC_177436 | 2957 coding  | coding    | coding    | coding    |
| MSTRG.173955.1 | GPR137C      | XLOC_177456 | 223 coding   | coding    | noncoding | noncoding |
| MSTRG.173999.1 | LOC105370500 | XLOC_177469 | 221 coding   | noncoding | noncoding | noncoding |
| MSTRG.174007.1 | FERMT2       | XLOC_177471 | 272 coding   | noncoding | noncoding | noncoding |
| MSTRG.174172.2 | DDHD1        | XLOC_177474 | 5259 coding  | noncoding | noncoding | noncoding |
| MSTRG.174252.1 | LOC105370504 | XLOC_177486 | 231 coding   | noncoding | noncoding | noncoding |
| MSTRG.174268.1 | LOC105370504 | XLOC_177488 | 287 coding   | noncoding | noncoding | noncoding |
| MSTRG.174012.1 | LOC107984676 | XLOC_177499 | 240 coding   | noncoding | noncoding | noncoding |
| MSTRG.174036.1 | CDKN3        | XLOC_177510 | 230 coding   | noncoding | noncoding | noncoding |
| MSTRG.174142.1 |              | XLOC_177557 | 303 coding   | noncoding | noncoding | noncoding |
| MSTRG.174165.1 | TBPL2        | XLOC_177567 | 266 coding   | noncoding | noncoding | noncoding |
| MSTRG.174170.1 | LOC105370512 | XLOC_177593 | 322 coding   | noncoding | noncoding | noncoding |
| MSTRG.174594.1 |              | XLOC_177671 | 267 coding   | noncoding | noncoding | noncoding |
| MSTRG.174397.1 |              | XLOC_177700 | 266 coding   | noncoding | noncoding | noncoding |
| MSTRG.174399.1 |              | XLOC_177702 | 392 coding   | noncoding | noncoding | noncoding |
| MSTRG.174427.1 | LOC105370516 | XLOC_177710 | 301 coding   | noncoding | noncoding | noncoding |
| MSTRG.174438.1 |              | XLOC_177715 | 249 coding   | noncoding | noncoding | noncoding |
| MSTRG.174467.1 | SLC35F4      | XLOC_177724 | 269 coding   | noncoding | noncoding | noncoding |
| MSTRG.174469.1 | SLC35F4      | XLOC_177726 | 390 coding   | coding    | noncoding | noncoding |
| MSTRG.174477.1 | ARMH4        | XLOC_177731 | 374 coding   | noncoding | noncoding | noncoding |
| MSTRG.174633.1 | ARID4A       | XLOC_177745 | 288 coding   | coding    | noncoding | noncoding |
| MSTRG.174634.1 | ARID4A       | XLOC_177746 | 250 coding   | noncoding | noncoding | noncoding |
| MSTRG.174641.1 | LOC105370522 | XLOC_177752 | 259 coding   | noncoding | noncoding | noncoding |
| MSTRG.174602.1 |              | XLOC_177761 | 273 coding   | noncoding | noncoding | noncoding |
| MSTRG.174617.1 |              | XLOC_177767 | 230 coding   | noncoding | noncoding | noncoding |
| NM_016475.5    | JKAMP        | XLOC_177796 | 2347 coding  | coding    | coding    | coding    |
| MSTRG.174716.1 |              | XLOC_177826 | 220 coding   | coding    | noncoding | noncoding |
| MSTRG.174739.3 | PPM1A        | XLOC_177827 | 1768 coding  | coding    | coding    | coding    |
| XM_005267781.1 | PPM1A        | XLOC_177827 | 8309 coding  | coding    | coding    | coding    |
| MSTRG.174720.1 |              | XLOC_177848 | 308 coding   | noncoding | noncoding | noncoding |
| NM_007374.3    | SIX6         | XLOC_177852 | 2592 coding  | coding    | coding    | coding    |
| MSTRG.174870.1 | SLC38A6      | XLOC_177883 | 247 coding   | noncoding | noncoding | noncoding |
| MSTRG.174826.1 |              | XLOC_177887 | 343 coding   | noncoding | noncoding | noncoding |
| XM_024449662.1 | PRKCH        | XLOC_177889 | 6492 coding  | coding    | coding    | coding    |
| MSTRG.174887.1 | HIF1A        | XLOC_177965 | 3848 coding  | coding    | coding    | coding    |
| MSTRG.174887.4 | HIF1A        | XLOC_177965 | 3882 coding  | coding    | coding    | coding    |
| XM_024449721.1 | SYT16        | XLOC_177972 | 14515 coding | coding    | coding    | coding    |
| XM_024449720.1 | SYT16        | XLOC_177972 | 14667 coding | coding    | coding    | coding    |
| MSTRG.174898.1 |              | XLOC_177980 | 224 coding   | noncoding | noncoding | noncoding |
| MSTRG.174900.1 |              | XLOC_177981 | 259 coding   | noncoding | noncoding | noncoding |

|                 |              |             |              |           |           |           |
|-----------------|--------------|-------------|--------------|-----------|-----------|-----------|
| MSTRG.174908.1  | LOC105370529 | XLOC_177986 | 216 coding   | noncoding | noncoding | noncoding |
| MSTRG.174904.1  |              | XLOC_177989 | 212 coding   | noncoding | noncoding | noncoding |
| MSTRG.174936.1  | KCNH5        | XLOC_177995 | 295 coding   | coding    | noncoding | noncoding |
| MSTRG.175054.1  |              | XLOC_178014 | 349 coding   | noncoding | noncoding | noncoding |
| XM_011536574.1  | SYNE2        | XLOC_178021 | 21948 coding | coding    | noncoding | coding    |
| MSTRG.175111.3  | MTHFD1       | XLOC_178034 | 594 coding   | coding    | coding    | noncoding |
| NM_021979.3     | HSPA2        | XLOC_178043 | 2770 coding  | coding    | coding    | coding    |
| MSTRG.175100.1  |              | XLOC_178049 | 218 coding   | noncoding | noncoding | noncoding |
| MSTRG.175150.1  |              | XLOC_178113 | 248 coding   | noncoding | noncoding | noncoding |
| MSTRG.175974.1  | RAD51B       | XLOC_178320 | 287 coding   | noncoding | noncoding | noncoding |
| MSTRG.175982.1  | RAD51B       | XLOC_178327 | 259 coding   | noncoding | noncoding | noncoding |
| MSTRG.175391.1  |              | XLOC_178396 | 286 coding   | noncoding | noncoding | noncoding |
| NM_020692.3     | GALNT16      | XLOC_178399 | 5523 coding  | coding    | coding    | coding    |
| MSTRG.175440.8  | ERH          | XLOC_178399 | 761 coding   | coding    | noncoding | noncoding |
| MSTRG.175458.1  |              | XLOC_178421 | 234 coding   | noncoding | noncoding | noncoding |
| MSTRG.175487.2  | SMOC1        | XLOC_178432 | 924 coding   | coding    | coding    | noncoding |
| NR_135825.1     | LOC646548    | XLOC_178439 | 2977 coding  | coding    | coding    | coding    |
| MSTRG.175592.1  | LOC101928075 | XLOC_178481 | 217 coding   | noncoding | noncoding | noncoding |
| MSTRG.175612.1  |              | XLOC_178515 | 324 coding   | noncoding | noncoding | noncoding |
| XR_245673.4     | PCNX1        | XLOC_178519 | 5015 coding  | noncoding | coding    | coding    |
| MSTRG.175664.1  | LOC105370557 | XLOC_178529 | 316 coding   | noncoding | noncoding | noncoding |
| NM_001354288.2  | SIPA1L1      | XLOC_178584 | 7998 coding  | coding    | coding    | coding    |
| MSTRG.175650.1  |              | XLOC_178646 | 282 coding   | noncoding | noncoding | noncoding |
| MSTRG.175859.1  |              | XLOC_178648 | 240 coding   | noncoding | noncoding | noncoding |
| MSTRG.175866.1  | RGS6         | XLOC_178652 | 317 coding   | noncoding | noncoding | noncoding |
| MSTRG.175880.1  | RGS6         | XLOC_178665 | 285 coding   | noncoding | noncoding | noncoding |
| MSTRG.175851.1  | DCAF4        | XLOC_178687 | 290 coding   | noncoding | noncoding | noncoding |
| MSTRG.175852.1  | DCAF4        | XLOC_178688 | 291 coding   | noncoding | noncoding | noncoding |
| XM_011536972.2  | PSEN1        | XLOC_178694 | 3058 coding  | coding    | coding    | coding    |
| MSTRG.175934.1  | HEATR4       | XLOC_178709 | 277 coding   | noncoding | noncoding | noncoding |
| MSTRG.175945.1  |              | XLOC_178715 | 240 coding   | noncoding | noncoding | noncoding |
| MSTRG.176040.1  | DNAL1        | XLOC_178720 | 222 coding   | noncoding | noncoding | noncoding |
| MSTRG.176149.16 | COQ6         | XLOC_178732 | 1380 coding  | coding    | coding    | noncoding |
| XM_017021662.1  | BBOF1        | XLOC_178733 | 2664 coding  | coding    | coding    | coding    |
| XM_017021764.1  | LIN52        | XLOC_178735 | 942 coding   | coding    | coding    | coding    |
| MSTRG.176127.1  |              | XLOC_178740 | 212 coding   | noncoding | noncoding | noncoding |
| MSTRG.176201.1  | AREL1        | XLOC_178766 | 3222 coding  | coding    | coding    | noncoding |
| XM_011536966.2  | YLP1M1       | XLOC_178769 | 6176 coding  | coding    | coding    | coding    |
| NM_001244883.2  | DLST         | XLOC_178784 | 1371 coding  | coding    | coding    | coding    |
| MSTRG.176252.1  |              | XLOC_178800 | 283 coding   | noncoding | noncoding | noncoding |
| MSTRG.176288.1  |              | XLOC_178821 | 255 coding   | noncoding | coding    | noncoding |
| MSTRG.176310.1  | IFT43        | XLOC_178855 | 206 coding   | noncoding | noncoding | noncoding |
| XM_011536553.2  | ESRRB        | XLOC_178870 | 4943 coding  | coding    | coding    | coding    |

|                |              |             |              |           |           |           |
|----------------|--------------|-------------|--------------|-----------|-----------|-----------|
| MSTRG.176354.1 | LOC105370577 | XLOC_178874 | 245 coding   | noncoding | noncoding | noncoding |
| NR_110554.1    | LINC02288    | XLOC_178881 | 2939 coding  | noncoding | coding    | noncoding |
| MSTRG.176423.1 |              | XLOC_178893 | 303 coding   | noncoding | noncoding | noncoding |
| MSTRG.176480.4 | TMED8        | XLOC_178905 | 4708 coding  | coding    | coding    | noncoding |
| MSTRG.176495.3 | VIPAS39      | XLOC_178911 | 2367 coding  | coding    | noncoding | noncoding |
| MSTRG.176467.2 | SPTLC2       | XLOC_178913 | 8027 coding  | coding    | coding    | noncoding |
| MSTRG.176464.1 |              | XLOC_178914 | 257 coding   | noncoding | noncoding | noncoding |
| NR_158973.1    | NRXN3        | XLOC_178925 | 13042 coding | coding    | coding    | coding    |
| MSTRG.176569.1 | NRXN3        | XLOC_178926 | 289 coding   | noncoding | noncoding | noncoding |
| MSTRG.176627.1 | NRXN3        | XLOC_178953 | 244 coding   | noncoding | noncoding | noncoding |
| MSTRG.176531.1 |              | XLOC_178959 | 291 coding   | noncoding | coding    | noncoding |
| MSTRG.176547.1 | DIO2         | XLOC_178965 | 339 coding   | noncoding | noncoding | noncoding |
| MSTRG.176561.1 | DIO2-AS1     | XLOC_178973 | 312 coding   | noncoding | noncoding | noncoding |
| MSTRG.176997.1 | CEP128       | XLOC_178991 | 243 coding   | noncoding | noncoding | noncoding |
| XM_011537119.2 | TSHR         | XLOC_179063 | 4343 coding  | coding    | coding    | coding    |
| MSTRG.177096.1 | TSHR         | XLOC_179065 | 226 coding   | noncoding | noncoding | noncoding |
| MSTRG.177124.1 | LOC101928462 | XLOC_179089 | 283 coding   | noncoding | noncoding | noncoding |
| MSTRG.177129.1 | LOC101928504 | XLOC_179093 | 9126 coding  | coding    | coding    | noncoding |
| MSTRG.176641.1 |              | XLOC_179100 | 242 coding   | noncoding | noncoding | noncoding |
| MSTRG.176659.1 |              | XLOC_179108 | 290 coding   | noncoding | noncoding | noncoding |
| MSTRG.176711.1 |              | XLOC_179124 | 308 coding   | noncoding | noncoding | noncoding |
| MSTRG.176712.1 |              | XLOC_179125 | 313 coding   | noncoding | noncoding | noncoding |
| MSTRG.176741.1 |              | XLOC_179137 | 257 coding   | noncoding | noncoding | noncoding |
| MSTRG.176751.1 |              | XLOC_179142 | 255 coding   | noncoding | noncoding | noncoding |
| MSTRG.176759.1 |              | XLOC_179147 | 207 coding   | coding    | noncoding | noncoding |
| XM_024449522.1 | FLRT2        | XLOC_179180 | 10321 coding | coding    | coding    | coding    |
| XM_017021130.1 | FLRT2        | XLOC_179180 | 17504 coding | coding    | coding    | coding    |
| MSTRG.176820.1 |              | XLOC_179183 | 274 coding   | noncoding | noncoding | noncoding |
| MSTRG.176844.1 |              | XLOC_179228 | 208 coding   | noncoding | noncoding | noncoding |
| MSTRG.176882.1 |              | XLOC_179250 | 272 coding   | noncoding | noncoding | noncoding |
| XM_017021452.1 | SPATA7       | XLOC_179282 | 2178 coding  | coding    | coding    | coding    |
| MSTRG.177151.1 | PTPN21       | XLOC_179285 | 279 coding   | noncoding | noncoding | noncoding |
| MSTRG.177152.1 | PTPN21       | XLOC_179286 | 249 coding   | noncoding | noncoding | noncoding |
| MSTRG.177182.1 | ZC3H14       | XLOC_179289 | 293 coding   | noncoding | noncoding | noncoding |
| MSTRG.177378.1 |              | XLOC_179338 | 263 coding   | noncoding | noncoding | noncoding |
| MSTRG.177380.1 |              | XLOC_179340 | 209 coding   | noncoding | noncoding | noncoding |
| MSTRG.177210.1 |              | XLOC_179343 | 295 coding   | noncoding | noncoding | noncoding |
| MSTRG.177277.1 | TDP1         | XLOC_179371 | 313 coding   | noncoding | noncoding | noncoding |
| MSTRG.177298.2 | NRDE2        | XLOC_179384 | 424 coding   | coding    | coding    | noncoding |
| MSTRG.177239.1 |              | XLOC_179386 | 246 coding   | noncoding | noncoding | noncoding |
| MSTRG.177286.1 |              | XLOC_179394 | 249 coding   | noncoding | noncoding | noncoding |
| MSTRG.177509.1 | DGLUCY       | XLOC_179411 | 255 coding   | noncoding | noncoding | noncoding |
| MSTRG.177411.4 | CCDC88C      | XLOC_179420 | 1757 coding  | coding    | coding    | coding    |

|                |              |             |              |           |           |           |
|----------------|--------------|-------------|--------------|-----------|-----------|-----------|
| MSTRG.177411.6 | CCDC88C      | XLOC_179420 | 2556 coding  | noncoding | coding    | noncoding |
| MSTRG.177461.1 | CPSF2        | XLOC_179447 | 243 coding   | noncoding | noncoding | noncoding |
| MSTRG.177524.1 |              | XLOC_179496 | 224 coding   | noncoding | noncoding | noncoding |
| XM_011537026.2 | UNC79        | XLOC_179515 | 11858 coding | coding    | noncoding | coding    |
| MSTRG.177632.1 | SERPINA9     | XLOC_179537 | 264 coding   | coding    | coding    | noncoding |
| MSTRG.177643.1 |              | XLOC_179547 | 305 coding   | noncoding | noncoding | noncoding |
| MSTRG.177647.1 |              | XLOC_179551 | 246 coding   | noncoding | noncoding | noncoding |
| MSTRG.177681.1 | LOC107984710 | XLOC_179569 | 274 coding   | noncoding | noncoding | noncoding |
| MSTRG.177682.1 | LOC107984710 | XLOC_179570 | 237 coding   | noncoding | noncoding | noncoding |
| NM_001282463.2 | C14orf132    | XLOC_179599 | 7726 coding  | noncoding | coding    | coding    |
| NM_000623.3    | BDKRB2       | XLOC_179604 | 4197 coding  | coding    | coding    | coding    |
| MSTRG.177830.6 | ATG2B        | XLOC_179608 | 3099 coding  | coding    | coding    | noncoding |
| MSTRG.177807.1 | AK7          | XLOC_179612 | 254 coding   | noncoding | noncoding | noncoding |
| MSTRG.177812.1 | AK7          | XLOC_179614 | 239 coding   | noncoding | noncoding | noncoding |
| MSTRG.177870.1 |              | XLOC_179639 | 238 coding   | noncoding | noncoding | noncoding |
| MSTRG.177879.1 |              | XLOC_179644 | 321 coding   | noncoding | noncoding | noncoding |
| MSTRG.177902.1 | LINC02291    | XLOC_179659 | 522 coding   | noncoding | noncoding | noncoding |
| MSTRG.178040.1 | LOC105370655 | XLOC_179707 | 464 coding   | noncoding | noncoding | noncoding |
| MSTRG.178083.1 |              | XLOC_179742 | 280 coding   | noncoding | noncoding | noncoding |
| MSTRG.178084.1 |              | XLOC_179743 | 289 coding   | noncoding | noncoding | noncoding |
| MSTRG.178096.1 |              | XLOC_179745 | 264 coding   | coding    | noncoding | noncoding |
| MSTRG.178209.3 | BCL11B       | XLOC_179812 | 6704 coding  | coding    | noncoding | noncoding |
| MSTRG.178158.1 |              | XLOC_179824 | 265 coding   | noncoding | noncoding | noncoding |
| XM_011537237.2 | HHIPL1       | XLOC_179841 | 2546 coding  | coding    | coding    | coding    |
| MSTRG.178244.1 | HHIPL1       | XLOC_179843 | 266 coding   | noncoding | noncoding | noncoding |
| MSTRG.178249.1 |              | XLOC_179851 | 222 coding   | noncoding | noncoding | noncoding |
| MSTRG.178313.1 | EVL          | XLOC_179854 | 300 coding   | noncoding | noncoding | noncoding |
| MSTRG.178284.1 |              | XLOC_179864 | 281 coding   | noncoding | noncoding | noncoding |
| MSTRG.178456.1 | WDR25        | XLOC_179891 | 283 coding   | noncoding | noncoding | noncoding |
| MSTRG.178457.1 | WDR25        | XLOC_179892 | 217 coding   | noncoding | noncoding | noncoding |
| MSTRG.178458.1 | WDR25        | XLOC_179893 | 230 coding   | noncoding | noncoding | noncoding |
| MSTRG.178337.1 | BEGAIN       | XLOC_179894 | 323 coding   | noncoding | noncoding | noncoding |
| MSTRG.178346.1 |              | XLOC_179904 | 294 coding   | noncoding | noncoding | noncoding |
| NR_046473.1    | MEG3         | XLOC_179908 | 9689 coding  | noncoding | coding    | coding    |
| MSTRG.178375.1 |              | XLOC_180015 | 232 coding   | noncoding | noncoding | noncoding |
| MSTRG.178440.1 |              | XLOC_180026 | 291 coding   | noncoding | noncoding | noncoding |
| MSTRG.178484.1 |              | XLOC_180065 | 280 coding   | noncoding | noncoding | noncoding |
| MSTRG.178516.2 | DYNC1H1      | XLOC_180066 | 366 coding   | noncoding | noncoding | noncoding |
| MSTRG.178518.1 | DYNC1H1      | XLOC_180068 | 408 coding   | noncoding | noncoding | noncoding |
| MSTRG.178519.1 | DYNC1H1      | XLOC_180069 | 242 coding   | noncoding | noncoding | noncoding |
| MSTRG.178520.1 | DYNC1H1      | XLOC_180070 | 358 coding   | noncoding | coding    | noncoding |
| MSTRG.178528.1 | HSP90AA1     | XLOC_180074 | 239 coding   | noncoding | noncoding | noncoding |
| XM_011537347.1 | WDR20        | XLOC_180076 | 2838 coding  | coding    | coding    | coding    |

|                 |              |             |              |           |           |           |
|-----------------|--------------|-------------|--------------|-----------|-----------|-----------|
| MSTRG.178576.17 | CINP         | XLOC_180089 | 1224 coding  | noncoding | coding    | noncoding |
| MSTRG.178579.5  | TECPR2       | XLOC_180090 | 229 coding   | noncoding | noncoding | noncoding |
| MSTRG.178591.1  | LOC105370680 | XLOC_180099 | 210 coding   | noncoding | noncoding | noncoding |
| XR_943406.3     | RCOR1        | XLOC_180104 | 5760 coding  | coding    | coding    | coding    |
| MSTRG.178569.1  | RCOR1        | XLOC_180110 | 256 coding   | noncoding | noncoding | noncoding |
| MSTRG.178571.1  | RCOR1        | XLOC_180112 | 243 coding   | noncoding | noncoding | noncoding |
| XM_017021619.1  | TRAF3        | XLOC_180115 | 9619 coding  | coding    | coding    | coding    |
| XM_024449583.1  | MARK3        | XLOC_180150 | 3593 coding  | coding    | coding    | coding    |
| MSTRG.178686.1  | MARK3        | XLOC_180160 | 304 coding   | noncoding | noncoding | noncoding |
| XR_002957597.1  | LOC112268131 | XLOC_180175 | 3550 coding  | noncoding | coding    | noncoding |
| MSTRG.178732.1  | TDRD9        | XLOC_180197 | 293 coding   | noncoding | noncoding | noncoding |
| NM_015656.1     | KIF26A       | XLOC_180203 | 6757 coding  | coding    | coding    | coding    |
| NR_146611.1     | LINC02691    | XLOC_180206 | 3287 coding  | noncoding | noncoding | noncoding |
| MSTRG.178787.1  |              | XLOC_180225 | 279 coding   | noncoding | noncoding | noncoding |
| MSTRG.178790.1  |              | XLOC_180226 | 249 coding   | noncoding | noncoding | noncoding |
| XM_017021851.1  | LOC107987211 | XLOC_180284 | 3078 coding  | noncoding | coding    | coding    |
| MSTRG.171590.1  |              | XLOC_180336 | 309 coding   | noncoding | noncoding | noncoding |
| MSTRG.171621.1  |              | XLOC_180343 | 390 coding   | noncoding | noncoding | noncoding |
| MSTRG.171624.1  |              | XLOC_180344 | 283 coding   | noncoding | noncoding | noncoding |
| MSTRG.171636.1  | LOC105378174 | XLOC_180349 | 371 coding   | noncoding | noncoding | noncoding |
| MSTRG.171631.1  |              | XLOC_180350 | 277 coding   | noncoding | noncoding | noncoding |
| MSTRG.171637.1  |              | XLOC_180357 | 329 coding   | noncoding | noncoding | noncoding |
| MSTRG.171648.1  |              | XLOC_180363 | 237 coding   | noncoding | noncoding | noncoding |
| MSTRG.171660.1  |              | XLOC_180372 | 291 coding   | noncoding | noncoding | noncoding |
| MSTRG.171681.1  | TTC5         | XLOC_180377 | 475 coding   | noncoding | noncoding | noncoding |
| MSTRG.171667.1  |              | XLOC_180384 | 225 coding   | noncoding | noncoding | noncoding |
| MSTRG.171704.1  |              | XLOC_180398 | 294 coding   | noncoding | noncoding | noncoding |
| MSTRG.171706.1  |              | XLOC_180400 | 265 coding   | noncoding | noncoding | noncoding |
| MSTRG.171780.1  |              | XLOC_180447 | 269 coding   | noncoding | noncoding | noncoding |
| NM_004500.3     | HNRNPC       | XLOC_180453 | 3213 coding  | coding    | coding    | coding    |
| MSTRG.171823.1  | RPGRIP1      | XLOC_180465 | 211 coding   | noncoding | noncoding | noncoding |
| MSTRG.171835.1  |              | XLOC_180475 | 290 coding   | noncoding | noncoding | noncoding |
| MSTRG.172250.33 | TRAV1-1      | XLOC_180531 | 2282 coding  | coding    | noncoding | noncoding |
| MSTRG.171852.1  | DAD1         | XLOC_180556 | 243 coding   | noncoding | noncoding | noncoding |
| MSTRG.171858.1  |              | XLOC_180563 | 379 coding   | noncoding | noncoding | noncoding |
| MSTRG.171893.1  | RBM23        | XLOC_180586 | 318 coding   | noncoding | noncoding | noncoding |
| MSTRG.171918.1  | PRMT5        | XLOC_180590 | 430 coding   | noncoding | noncoding | noncoding |
| MSTRG.171919.1  | LOC101926933 | XLOC_180591 | 322 coding   | noncoding | noncoding | noncoding |
| MSTRG.171947.1  | RNF212B      | XLOC_180608 | 271 coding   | noncoding | noncoding | noncoding |
| MSTRG.171949.1  | RNF212B      | XLOC_180609 | 260 coding   | noncoding | noncoding | noncoding |
| MSTRG.171990.1  |              | XLOC_180642 | 295 coding   | noncoding | noncoding | noncoding |
| XM_011537246.3  | ZFHX2        | XLOC_180644 | 11534 coding | coding    | coding    | coding    |
| MSTRG.172038.18 | DCAF11       | XLOC_180666 | 2246 coding  | coding    | coding    | coding    |

|                |              |             |             |           |           |           |
|----------------|--------------|-------------|-------------|-----------|-----------|-----------|
| NM_014169.4    | CHMP4A       | XLOC_180681 | 1014 coding | coding    | coding    | coding    |
| MSTRG.172056.2 | TGM1         | XLOC_180684 | 230 coding  | noncoding | noncoding | noncoding |
| MSTRG.172069.1 | NYNRIN       | XLOC_180692 | 442 coding  | noncoding | noncoding | noncoding |
| MSTRG.172070.1 | NYNRIN       | XLOC_180693 | 303 coding  | noncoding | noncoding | noncoding |
| MSTRG.172130.1 | STXBP6       | XLOC_180717 | 400 coding  | noncoding | noncoding | noncoding |
| MSTRG.172151.1 |              | XLOC_180729 | 304 coding  | noncoding | noncoding | noncoding |
| MSTRG.172154.1 |              | XLOC_180731 | 247 coding  | noncoding | noncoding | noncoding |
| MSTRG.172157.1 |              | XLOC_180732 | 422 coding  | coding    | noncoding | noncoding |
| MSTRG.172172.1 |              | XLOC_180740 | 290 coding  | noncoding | noncoding | noncoding |
| NM_001366391.2 | NOVA1        | XLOC_180743 | 7092 coding | coding    | coding    | coding    |
| MSTRG.172304.1 | NOVA1        | XLOC_180744 | 313 coding  | noncoding | noncoding | noncoding |
| MSTRG.172292.1 | LINC02588    | XLOC_180746 | 212 coding  | noncoding | noncoding | noncoding |
| MSTRG.172296.1 | LINC02588    | XLOC_180748 | 358 coding  | noncoding | noncoding | noncoding |
| MSTRG.172338.1 |              | XLOC_180771 | 244 coding  | noncoding | noncoding | noncoding |
| MSTRG.172342.1 |              | XLOC_180773 | 285 coding  | noncoding | noncoding | noncoding |
| MSTRG.172347.1 |              | XLOC_180776 | 224 coding  | noncoding | noncoding | noncoding |
| MSTRG.172349.1 |              | XLOC_180778 | 254 coding  | noncoding | noncoding | noncoding |
| MSTRG.172387.1 | LOC107984685 | XLOC_180792 | 535 coding  | noncoding | noncoding | noncoding |
| MSTRG.172370.1 |              | XLOC_180797 | 213 coding  | noncoding | noncoding | noncoding |
| MSTRG.172400.1 | PRKD1        | XLOC_180801 | 234 coding  | noncoding | noncoding | noncoding |
| MSTRG.172417.1 |              | XLOC_180812 | 224 coding  | noncoding | noncoding | noncoding |
| MSTRG.172531.1 | AP4S1        | XLOC_180842 | 277 coding  | noncoding | noncoding | noncoding |
| MSTRG.172470.1 | HEATR5A      | XLOC_180871 | 277 coding  | noncoding | noncoding | noncoding |
| MSTRG.172472.1 | HEATR5A      | XLOC_180873 | 288 coding  | noncoding | noncoding | noncoding |
| MSTRG.172576.1 | LOC105370438 | XLOC_180880 | 266 coding  | noncoding | noncoding | noncoding |
| MSTRG.172579.1 | LOC105370438 | XLOC_180881 | 266 coding  | noncoding | noncoding | noncoding |
| MSTRG.172555.1 |              | XLOC_180960 | 233 coding  | noncoding | noncoding | noncoding |
| MSTRG.172666.1 | AKAP6        | XLOC_180970 | 222 coding  | noncoding | noncoding | noncoding |
| MSTRG.172723.1 | NPAS3        | XLOC_181003 | 301 coding  | noncoding | noncoding | noncoding |
| MSTRG.172734.1 | NPAS3        | XLOC_181009 | 295 coding  | noncoding | noncoding | noncoding |
| MSTRG.172570.1 |              | XLOC_181016 | 262 coding  | noncoding | noncoding | noncoding |
| MSTRG.172763.1 |              | XLOC_181032 | 290 coding  | noncoding | noncoding | noncoding |
| MSTRG.172795.1 | SPTSSA       | XLOC_181034 | 285 coding  | noncoding | noncoding | noncoding |
| MSTRG.172801.1 | EAPP         | XLOC_181040 | 204 coding  | noncoding | noncoding | noncoding |
| MSTRG.172807.1 |              | XLOC_181047 | 266 coding  | noncoding | noncoding | noncoding |
| MSTRG.172817.1 |              | XLOC_181053 | 657 coding  | noncoding | noncoding | noncoding |
| MSTRG.172859.3 | FAM177A1     | XLOC_181060 | 1507 coding | coding    | coding    | noncoding |
| MSTRG.172839.1 | PSMA6        | XLOC_181064 | 263 coding  | noncoding | noncoding | noncoding |
| MSTRG.172836.1 |              | XLOC_181071 | 252 coding  | noncoding | noncoding | noncoding |
| MSTRG.173076.1 | RALGAPA1     | XLOC_181097 | 243 coding  | noncoding | noncoding | noncoding |
| MSTRG.173077.1 | RALGAPA1     | XLOC_181098 | 279 coding  | noncoding | noncoding | noncoding |
| MSTRG.173078.1 | RALGAPA1     | XLOC_181099 | 619 coding  | noncoding | noncoding | noncoding |
| MSTRG.172882.1 |              | XLOC_181116 | 250 coding  | noncoding | noncoding | noncoding |

|                  |              |             |             |           |           |           |
|------------------|--------------|-------------|-------------|-----------|-----------|-----------|
| MSTRG. 172920. 1 | SLC25A21     | XLOC_181131 | 244 coding  | noncoding | noncoding | noncoding |
| MSTRG. 172931. 1 | SLC25A21     | XLOC_181136 | 207 coding  | noncoding | noncoding | noncoding |
| MSTRG. 172934. 1 | SLC25A21     | XLOC_181138 | 262 coding  | noncoding | noncoding | noncoding |
| MSTRG. 172975. 1 | MIPOL1       | XLOC_181151 | 261 coding  | noncoding | noncoding | noncoding |
| MSTRG. 172982. 1 | MIPOL1       | XLOC_181156 | 236 coding  | noncoding | noncoding | noncoding |
| MSTRG. 172983. 1 | MIPOL1       | XLOC_181157 | 254 coding  | noncoding | noncoding | noncoding |
| MSTRG. 172987. 1 | MIPOL1       | XLOC_181160 | 298 coding  | noncoding | noncoding | noncoding |
| MSTRG. 172998. 1 | TTC6         | XLOC_181165 | 263 coding  | noncoding | noncoding | noncoding |
| MSTRG. 173004. 1 | TTC6         | XLOC_181168 | 303 coding  | noncoding | noncoding | noncoding |
| MSTRG. 173091. 1 |              | XLOC_181193 | 224 coding  | noncoding | noncoding | noncoding |
| MSTRG. 173125. 1 |              | XLOC_181204 | 390 coding  | noncoding | noncoding | noncoding |
| MSTRG. 173137. 1 |              | XLOC_181280 | 323 coding  | noncoding | noncoding | noncoding |
| MSTRG. 173141. 1 |              | XLOC_181282 | 236 coding  | noncoding | noncoding | noncoding |
| MSTRG. 173152. 1 |              | XLOC_181289 | 247 coding  | noncoding | noncoding | noncoding |
| XR_001750740. 2  | LOC105370469 | XLOC_181303 | 9141 coding | noncoding | coding    | noncoding |
| MSTRG. 173205. 1 |              | XLOC_181310 | 300 coding  | coding    | noncoding | noncoding |
| MSTRG. 173208. 1 |              | XLOC_181313 | 303 coding  | noncoding | noncoding | noncoding |
| MSTRG. 173211. 1 |              | XLOC_181314 | 255 coding  | noncoding | noncoding | noncoding |
| MSTRG. 173228. 1 |              | XLOC_181319 | 203 coding  | noncoding | noncoding | noncoding |
| MSTRG. 173234. 1 |              | XLOC_181322 | 202 coding  | noncoding | noncoding | noncoding |
| MSTRG. 173256. 1 |              | XLOC_181333 | 598 coding  | noncoding | coding    | noncoding |
| MSTRG. 173268. 1 |              | XLOC_181339 | 289 coding  | noncoding | noncoding | noncoding |
| MSTRG. 173278. 1 | LINC02307    | XLOC_181345 | 235 coding  | noncoding | noncoding | noncoding |
| MSTRG. 173282. 1 |              | XLOC_181348 | 314 coding  | noncoding | noncoding | noncoding |
| MSTRG. 173292. 1 | LINC02277    | XLOC_181353 | 218 coding  | noncoding | noncoding | noncoding |
| MSTRG. 173303. 1 |              | XLOC_181359 | 310 coding  | noncoding | noncoding | noncoding |
| MSTRG. 173306. 1 |              | XLOC_181364 | 256 coding  | noncoding | noncoding | noncoding |
| MSTRG. 173504. 3 | PRPF39       | XLOC_181382 | 1057 coding | noncoding | noncoding | noncoding |
| MSTRG. 173425. 1 | LOC105370476 | XLOC_181404 | 298 coding  | noncoding | noncoding | noncoding |
| MSTRG. 173437. 1 |              | XLOC_181410 | 207 coding  | coding    | noncoding | noncoding |
| MSTRG. 173440. 1 |              | XLOC_181412 | 532 coding  | noncoding | noncoding | noncoding |
| MSTRG. 173448. 1 | LINC00871    | XLOC_181415 | 318 coding  | noncoding | noncoding | noncoding |
| MSTRG. 173480. 1 |              | XLOC_181421 | 326 coding  | noncoding | noncoding | noncoding |
| MSTRG. 173514. 1 |              | XLOC_181437 | 315 coding  | coding    | noncoding | noncoding |
| MSTRG. 173555. 1 |              | XLOC_181439 | 222 coding  | noncoding | noncoding | noncoding |
| MSTRG. 173565. 1 | LOC101927483 | XLOC_181445 | 276 coding  | coding    | noncoding | noncoding |
| MSTRG. 173571. 1 |              | XLOC_181451 | 360 coding  | noncoding | noncoding | noncoding |
| MSTRG. 173576. 1 | LOC105378178 | XLOC_181453 | 253 coding  | noncoding | noncoding | noncoding |
| MSTRG. 173581. 1 | LOC105378178 | XLOC_181456 | 353 coding  | coding    | noncoding | noncoding |
| MSTRG. 173582. 1 | LOC105378178 | XLOC_181457 | 283 coding  | noncoding | noncoding | noncoding |
| MSTRG. 173605. 1 | LOC105378178 | XLOC_181463 | 256 coding  | coding    | noncoding | noncoding |
| MSTRG. 173612. 5 | LOC107987206 | XLOC_181466 | 281 coding  | noncoding | noncoding | noncoding |
| XR_943557. 3     | NEMF         | XLOC_181488 | 2825 coding | coding    | coding    | coding    |

|                   |              |             |              |           |           |           |
|-------------------|--------------|-------------|--------------|-----------|-----------|-----------|
| MSTRG. 173680. 4  | LOC105378179 | XLOC_181490 | 467 coding   | noncoding | noncoding | noncoding |
| MSTRG. 173680. 1  | LOC105378179 | XLOC_181490 | 469 coding   | noncoding | noncoding | noncoding |
| MSTRG. 173680. 3  | LOC105378179 | XLOC_181490 | 464 coding   | noncoding | noncoding | noncoding |
| MSTRG. 173680. 9  | LOC105378179 | XLOC_181490 | 273 coding   | noncoding | noncoding | noncoding |
| MSTRG. 173680. 10 | LOC105378179 | XLOC_181490 | 250 coding   | noncoding | noncoding | noncoding |
| XR_943531. 2      | VCPKMT       | XLOC_181493 | 1810 coding  | coding    | coding    | coding    |
| MSTRG. 173642. 1  |              | XLOC_181508 | 277 coding   | noncoding | noncoding | noncoding |
| MSTRG. 173697. 1  | MAP4K5       | XLOC_181511 | 265 coding   | noncoding | noncoding | noncoding |
| XM_024449622. 1   | NIN          | XLOC_181536 | 10338 coding | noncoding | coding    | coding    |
| MSTRG. 173748. 1  | ABHD12B      | XLOC_181564 | 287 coding   | noncoding | noncoding | noncoding |
| MSTRG. 173764. 1  | TRIM9        | XLOC_181574 | 301 coding   | noncoding | noncoding | noncoding |
| MSTRG. 173739. 1  |              | XLOC_181578 | 272 coding   | noncoding | noncoding | noncoding |
| MSTRG. 173815. 1  |              | XLOC_181607 | 253 coding   | noncoding | noncoding | noncoding |
| MSTRG. 173909. 1  |              | XLOC_181630 | 318 coding   | noncoding | noncoding | noncoding |
| MSTRG. 173964. 1  | ERO1A        | XLOC_181668 | 476 coding   | noncoding | noncoding | noncoding |
| MSTRG. 174001. 1  | LOC105370500 | XLOC_181678 | 278 coding   | noncoding | noncoding | noncoding |
| MSTRG. 174311. 1  | LOC105370504 | XLOC_181806 | 241 coding   | noncoding | noncoding | noncoding |
| MSTRG. 174315. 1  | LOC105370504 | XLOC_181809 | 240 coding   | noncoding | noncoding | noncoding |
| MSTRG. 174014. 1  |              | XLOC_181817 | 243 coding   | noncoding | noncoding | noncoding |
| NM_001024024. 1   | GCH1         | XLOC_181866 | 1980 coding  | coding    | coding    | coding    |
| MSTRG. 174108. 1  | GCH1         | XLOC_181868 | 251 coding   | coding    | noncoding | noncoding |
| MSTRG. 174109. 1  | GCH1         | XLOC_181869 | 253 coding   | noncoding | noncoding | noncoding |
| MSTRG. 174111. 1  | GCH1         | XLOC_181871 | 237 coding   | noncoding | noncoding | noncoding |
| MSTRG. 174113. 1  |              | XLOC_181885 | 231 coding   | noncoding | noncoding | noncoding |
| MSTRG. 174148. 1  |              | XLOC_181893 | 281 coding   | noncoding | coding    | noncoding |
| MSTRG. 174149. 1  |              | XLOC_181897 | 264 coding   | noncoding | noncoding | noncoding |
| MSTRG. 174152. 1  |              | XLOC_181898 | 664 coding   | noncoding | noncoding | noncoding |
| MSTRG. 174593. 1  |              | XLOC_181943 | 267 coding   | noncoding | noncoding | noncoding |
| MSTRG. 174409. 11 | TMEM260      | XLOC_181956 | 3374 coding  | noncoding | noncoding | noncoding |
| MSTRG. 174376. 1  |              | XLOC_181962 | 279 coding   | noncoding | noncoding | noncoding |
| MSTRG. 174466. 1  | SLC35F4      | XLOC_182001 | 269 coding   | noncoding | noncoding | noncoding |
| XM_017021030. 2   | ARMH4        | XLOC_182003 | 13716 coding | coding    | coding    | coding    |
| MSTRG. 174485. 1  | ARMH4        | XLOC_182011 | 231 coding   | coding    | noncoding | noncoding |
| MSTRG. 174642. 1  | LOC105370522 | XLOC_182026 | 262 coding   | noncoding | noncoding | noncoding |
| MSTRG. 174604. 1  |              | XLOC_182036 | 205 coding   | noncoding | noncoding | noncoding |
| MSTRG. 174742. 12 | PPM1A        | XLOC_182108 | 3268 coding  | coding    | coding    | noncoding |
| MSTRG. 174968. 9  | PRKCH        | XLOC_182153 | 2926 coding  | coding    | coding    | coding    |
| MSTRG. 174896. 1  |              | XLOC_182182 | 278 coding   | noncoding | noncoding | noncoding |
| MSTRG. 174897. 1  |              | XLOC_182183 | 311 coding   | coding    | noncoding | noncoding |
| MSTRG. 174899. 1  |              | XLOC_182184 | 411 coding   | noncoding | noncoding | coding    |
| MSTRG. 174934. 1  | KCNH5        | XLOC_182192 | 205 coding   | noncoding | noncoding | noncoding |
| MSTRG. 174935. 1  | KCNH5        | XLOC_182193 | 295 coding   | coding    | noncoding | noncoding |
| MSTRG. 174937. 1  | KCNH5        | XLOC_182194 | 276 coding   | noncoding | noncoding | noncoding |

|                   |              |             |              |           |           |           |
|-------------------|--------------|-------------|--------------|-----------|-----------|-----------|
| MSTRG. 174961. 1  | RHOJ         | XLOC_182206 | 367 coding   | noncoding | noncoding | noncoding |
| MSTRG. 174963. 1  |              | XLOC_182211 | 313 coding   | noncoding | noncoding | noncoding |
| NR_104104. 2      | PPP2R5E      | XLOC_182213 | 6484 coding  | coding    | coding    | coding    |
| MSTRG. 175081. 1  | PPP2R5E      | XLOC_182225 | 237 coding   | noncoding | noncoding | noncoding |
| MSTRG. 175055. 1  |              | XLOC_182229 | 260 coding   | noncoding | noncoding | noncoding |
| MSTRG. 175057. 1  |              | XLOC_182230 | 237 coding   | noncoding | noncoding | noncoding |
| NM_030791. 4      | SGPP1        | XLOC_182234 | 3336 coding  | coding    | coding    | coding    |
| MSTRG. 175271. 10 | SYNE2        | XLOC_182235 | 22053 coding | coding    | coding    | coding    |
| MSTRG. 175089. 1  |              | XLOC_182240 | 234 coding   | noncoding | noncoding | noncoding |
| NR_033777. 1      | TEX21P       | XLOC_182241 | 1045 coding  | noncoding | noncoding | noncoding |
| MSTRG. 175095. 1  |              | XLOC_182245 | 238 coding   | noncoding | noncoding | noncoding |
| NM_145113. 3      | MAX          | XLOC_182256 | 2111 coding  | coding    | coding    | noncoding |
| MSTRG. 175128. 1  |              | XLOC_182264 | 290 coding   | noncoding | noncoding | noncoding |
| MSTRG. 175129. 1  |              | XLOC_182266 | 297 coding   | noncoding | noncoding | noncoding |
| MSTRG. 175315. 1  | FUT8         | XLOC_182285 | 1047 coding  | noncoding | noncoding | noncoding |
| MSTRG. 175149. 1  |              | XLOC_182297 | 262 coding   | noncoding | noncoding | noncoding |
| MSTRG. 175802. 1  | GPHN         | XLOC_182333 | 288 coding   | noncoding | noncoding | noncoding |
| NM_001348544. 2   | TMEM229B     | XLOC_182335 | 4041 coding  | coding    | coding    | coding    |
| MSTRG. 175389. 1  |              | XLOC_182392 | 354 coding   | noncoding | noncoding | noncoding |
| XM_011537278. 1   | DCAF5        | XLOC_182393 | 6356 coding  | coding    | coding    | coding    |
| MSTRG. 175444. 1  | ERH          | XLOC_182413 | 217 coding   | noncoding | noncoding | noncoding |
| MSTRG. 175447. 4  | SLC39A9      | XLOC_182415 | 4852 coding  | coding    | coding    | noncoding |
| NM_001271507. 2   | CCDC177      | XLOC_182422 | 4182 coding  | coding    | coding    | coding    |
| MSTRG. 175460. 1  |              | XLOC_182425 | 288 coding   | noncoding | noncoding | noncoding |
| NM_033262. 4      | SLC8A3       | XLOC_182446 | 5262 coding  | coding    | coding    | coding    |
| MSTRG. 175528. 1  |              | XLOC_182461 | 239 coding   | noncoding | noncoding | noncoding |
| MSTRG. 175546. 1  | ADAM21       | XLOC_182462 | 247 coding   | noncoding | noncoding | noncoding |
| MSTRG. 175574. 1  | LOC105370556 | XLOC_182471 | 241 coding   | noncoding | noncoding | noncoding |
| MSTRG. 175588. 1  | MED6         | XLOC_182479 | 249 coding   | noncoding | coding    | noncoding |
| MSTRG. 175626. 1  | MAP3K9       | XLOC_182487 | 270 coding   | noncoding | noncoding | noncoding |
| MSTRG. 175636. 1  | MAP3K9       | XLOC_182490 | 233 coding   | noncoding | noncoding | noncoding |
| MSTRG. 176045. 30 | LOC102724015 | XLOC_182505 | 5662 coding  | coding    | coding    | noncoding |
| MSTRG. 176045. 48 | SIPA1L1      | XLOC_182505 | 1301 coding  | noncoding | noncoding | coding    |
| MSTRG. 176045. 51 | SIPA1L1      | XLOC_182505 | 1378 coding  | noncoding | noncoding | noncoding |
| MSTRG. 175652. 1  |              | XLOC_182515 | 251 coding   | noncoding | noncoding | noncoding |
| MSTRG. 175861. 1  | RGS6         | XLOC_182516 | 254 coding   | noncoding | noncoding | noncoding |
| MSTRG. 175864. 4  | RGS6         | XLOC_182518 | 326 coding   | noncoding | noncoding | noncoding |
| MSTRG. 175900. 1  | DPF3         | XLOC_182526 | 234 coding   | noncoding | noncoding | noncoding |
| MSTRG. 175903. 1  | DPF3         | XLOC_182528 | 506 coding   | noncoding | noncoding | noncoding |
| MSTRG. 175856. 1  | ZFYVE1       | XLOC_182537 | 241 coding   | noncoding | noncoding | noncoding |
| MSTRG. 175910. 7  | LOC105370560 | XLOC_182539 | 2996 coding  | coding    | noncoding | coding    |
| MSTRG. 175910. 17 | RBM25        | XLOC_182539 | 2501 coding  | coding    | noncoding | noncoding |
| XM_006720143. 2   | HEATR4       | XLOC_182551 | 3509 coding  | coding    | coding    | coding    |

|                |              |             |             |           |           |           |
|----------------|--------------|-------------|-------------|-----------|-----------|-----------|
| MSTRG.175933.1 | HEATR4       | XLOC_182552 | 277 coding  | noncoding | noncoding | noncoding |
| MSTRG.176152.1 | ENTPD5       | XLOC_182581 | 258 coding  | noncoding | noncoding | noncoding |
| MSTRG.176154.5 | ALDH6A1      | XLOC_182582 | 1863 coding | coding    | coding    | noncoding |
| MSTRG.176154.8 | ALDH6A1      | XLOC_182582 | 2091 coding | coding    | coding    | noncoding |
| NM_001278594.2 | ALDH6A1      | XLOC_182582 | 5625 coding | coding    | coding    | coding    |
| MSTRG.176175.1 | SYNDIG1L     | XLOC_182593 | 286 coding  | noncoding | noncoding | noncoding |
| MSTRG.176184.1 | NPC2         | XLOC_182599 | 282 coding  | coding    | noncoding | noncoding |
| MSTRG.176139.1 |              | XLOC_182619 | 255 coding  | noncoding | noncoding | noncoding |
| MSTRG.176266.1 | NEK9         | XLOC_182638 | 260 coding  | noncoding | noncoding | noncoding |
| MSTRG.176257.1 |              | XLOC_182643 | 252 coding  | noncoding | noncoding | noncoding |
| MSTRG.176289.1 |              | XLOC_182655 | 255 coding  | noncoding | noncoding | noncoding |
| MSTRG.176385.2 | BATF         | XLOC_182658 | 648 coding  | coding    | noncoding | noncoding |
| MSTRG.176348.1 | ESRRB        | XLOC_182691 | 291 coding  | noncoding | noncoding | noncoding |
| MSTRG.176370.1 | LRRRC74A     | XLOC_182707 | 303 coding  | noncoding | coding    | noncoding |
| MSTRG.176426.1 |              | XLOC_182710 | 311 coding  | noncoding | noncoding | noncoding |
| XM_017021843.2 | LOC105370579 | XLOC_182714 | 3532 coding | noncoding | coding    | coding    |
| MSTRG.176422.1 |              | XLOC_182725 | 303 coding  | noncoding | noncoding | noncoding |
| MSTRG.176447.1 | TMEM63C      | XLOC_182733 | 273 coding  | noncoding | noncoding | noncoding |
| MSTRG.176482.1 | TMED8        | XLOC_182744 | 277 coding  | noncoding | noncoding | noncoding |
| MSTRG.176484.1 | TMED8        | XLOC_182746 | 307 coding  | noncoding | noncoding | noncoding |
| MSTRG.176485.1 | TMED8        | XLOC_182747 | 235 coding  | noncoding | noncoding | noncoding |
| NM_199296.3    | ISM2         | XLOC_182755 | 2940 coding | coding    | coding    | coding    |
| MSTRG.176471.1 | SPTLC2       | XLOC_182759 | 225 coding  | noncoding | noncoding | noncoding |
| MSTRG.176473.1 | SPTLC2       | XLOC_182761 | 230 coding  | noncoding | noncoding | noncoding |
| MSTRG.176463.1 |              | XLOC_182767 | 257 coding  | noncoding | noncoding | noncoding |
| MSTRG.176514.1 | ADCK1        | XLOC_182775 | 232 coding  | noncoding | noncoding | noncoding |
| MSTRG.176572.1 | NRXN3        | XLOC_182782 | 243 coding  | noncoding | noncoding | noncoding |
| MSTRG.176582.1 | NRXN3        | XLOC_182789 | 246 coding  | noncoding | noncoding | noncoding |
| XR_944068.3    | LOC105370589 | XLOC_182793 | 2005 coding | coding    | coding    | coding    |
| XR_001751014.1 | LOC107984629 | XLOC_182800 | 8088 coding | coding    | noncoding | noncoding |
| NM_001324462.2 | DIO2         | XLOC_182832 | 6383 coding | coding    | coding    | noncoding |
| XM_011536495.2 | CEP128       | XLOC_182842 | 3950 coding | noncoding | coding    | coding    |
| MSTRG.176996.1 | CEP128       | XLOC_182844 | 243 coding  | noncoding | noncoding | noncoding |
| MSTRG.177037.1 | CEP128       | XLOC_182852 | 323 coding  | noncoding | noncoding | noncoding |
| MSTRG.177087.1 | CEP128       | XLOC_182864 | 294 coding  | noncoding | noncoding | noncoding |
| MSTRG.176648.1 | STON2        | XLOC_182891 | 238 coding  | noncoding | noncoding | noncoding |
| MSTRG.176692.1 | SEL1L        | XLOC_182903 | 612 coding  | noncoding | noncoding | noncoding |
| MSTRG.176642.1 |              | XLOC_182908 | 242 coding  | noncoding | noncoding | noncoding |
| MSTRG.176670.1 |              | XLOC_182921 | 249 coding  | noncoding | noncoding | noncoding |
| MSTRG.176713.1 |              | XLOC_182935 | 313 coding  | noncoding | noncoding | noncoding |
| MSTRG.176744.1 |              | XLOC_182953 | 248 coding  | noncoding | coding    | noncoding |
| MSTRG.176749.1 |              | XLOC_182956 | 302 coding  | coding    | noncoding | noncoding |
| MSTRG.176780.1 |              | XLOC_182970 | 298 coding  | noncoding | noncoding | noncoding |

|                 |              |             |              |           |           |           |
|-----------------|--------------|-------------|--------------|-----------|-----------|-----------|
| MSTRG.176803.1  | LOC105370604 | XLOC_182980 | 318 coding   | noncoding | noncoding | noncoding |
| XR_110231.7     | LOC100506731 | XLOC_182988 | 5150 coding  | noncoding | noncoding | noncoding |
| MSTRG.176836.1  |              | XLOC_183004 | 245 coding   | noncoding | noncoding | noncoding |
| MSTRG.176849.1  |              | XLOC_183011 | 235 coding   | noncoding | noncoding | noncoding |
| MSTRG.176861.1  |              | XLOC_183018 | 312 coding   | noncoding | noncoding | noncoding |
| MSTRG.176883.1  |              | XLOC_183028 | 272 coding   | noncoding | noncoding | noncoding |
| MSTRG.176974.1  | LOC105370612 | XLOC_183051 | 320 coding   | coding    | noncoding | noncoding |
| MSTRG.177142.2  | SPATA7       | XLOC_183057 | 415 coding   | coding    | noncoding | noncoding |
| MSTRG.177361.1  | FOXN3        | XLOC_183117 | 301 coding   | noncoding | noncoding | noncoding |
| MSTRG.177211.1  |              | XLOC_183129 | 285 coding   | noncoding | noncoding | noncoding |
| MSTRG.177237.1  | KCNK13       | XLOC_183155 | 225 coding   | noncoding | noncoding | noncoding |
| MSTRG.177287.1  |              | XLOC_183164 | 326 coding   | noncoding | noncoding | noncoding |
| MSTRG.177291.1  |              | XLOC_183165 | 218 coding   | noncoding | noncoding | noncoding |
| MSTRG.177310.1  | TTC7B        | XLOC_183172 | 289 coding   | noncoding | noncoding | noncoding |
| MSTRG.177490.1  | RPS6KA5      | XLOC_183199 | 259 coding   | noncoding | noncoding | noncoding |
| MSTRG.177505.14 | GPR68        | XLOC_183212 | 12556 coding | coding    | coding    | coding    |
| MSTRG.177505.18 | SNORA11B     | XLOC_183212 | 4256 coding  | noncoding | coding    | noncoding |
| MSTRG.177505.28 | GPR68        | XLOC_183212 | 7084 coding  | coding    | coding    | noncoding |
| MSTRG.177416.1  | CCDC88C      | XLOC_183220 | 252 coding   | noncoding | noncoding | noncoding |
| MSTRG.177421.1  | CCDC88C      | XLOC_183224 | 306 coding   | noncoding | noncoding | noncoding |
| MSTRG.177394.1  | PPP4R3A      | XLOC_183235 | 222 coding   | noncoding | noncoding | noncoding |
| NM_001128595.3  | TC2N         | XLOC_183244 | 4968 coding  | coding    | noncoding | coding    |
| MSTRG.177448.1  |              | XLOC_183249 | 259 coding   | noncoding | noncoding | noncoding |
| MSTRG.177433.1  | ATXN3        | XLOC_183254 | 340 coding   | noncoding | noncoding | noncoding |
| MSTRG.177532.1  | LGMN         | XLOC_183281 | 232 coding   | noncoding | noncoding | noncoding |
| MSTRG.177642.1  |              | XLOC_183331 | 536 coding   | noncoding | noncoding | noncoding |
| MSTRG.177646.1  |              | XLOC_183334 | 308 coding   | noncoding | noncoding | noncoding |
| XM_011536601.3  | DICER1       | XLOC_183345 | 10482 coding | coding    | coding    | coding    |
| MSTRG.177719.1  |              | XLOC_183417 | 436 coding   | noncoding | noncoding | noncoding |
| MSTRG.177811.1  | AK7          | XLOC_183442 | 239 coding   | noncoding | noncoding | noncoding |
| MSTRG.178034.1  | LOC105370655 | XLOC_183559 | 280 coding   | noncoding | noncoding | noncoding |
| MSTRG.178111.1  |              | XLOC_183593 | 216 coding   | noncoding | noncoding | noncoding |
| MSTRG.178314.1  | EVL          | XLOC_183670 | 300 coding   | noncoding | noncoding | noncoding |
| MSTRG.178281.1  |              | XLOC_183676 | 333 coding   | noncoding | noncoding | noncoding |
| XM_024449706.1  | WARS         | XLOC_183682 | 2982 coding  | coding    | coding    | coding    |
| MSTRG.178349.1  | DLK1         | XLOC_183697 | 335 coding   | coding    | noncoding | noncoding |
| MSTRG.178345.1  |              | XLOC_183700 | 294 coding   | noncoding | noncoding | noncoding |
| MSTRG.178358.1  | MEG3         | XLOC_183706 | 261 coding   | noncoding | noncoding | noncoding |
| MSTRG.178363.1  |              | XLOC_183717 | 306 coding   | noncoding | noncoding | noncoding |
| MSTRG.178438.1  |              | XLOC_183733 | 305 coding   | noncoding | noncoding | noncoding |
| XR_001750894.1  | LOC107984698 | XLOC_183734 | 1471 coding  | noncoding | coding    | noncoding |
| MSTRG.178464.1  |              | XLOC_183743 | 237 coding   | noncoding | noncoding | noncoding |
| MSTRG.178489.10 | PPP2R5C      | XLOC_183744 | 8043 coding  | coding    | coding    | noncoding |

|                 |              |             |              |           |           |           |
|-----------------|--------------|-------------|--------------|-----------|-----------|-----------|
| MSTRG.178487.1  |              | XLOC_183750 | 291 coding   | noncoding | noncoding | noncoding |
| MSTRG.178515.2  | LOC107984661 | XLOC_183751 | 14411 coding | coding    | coding    | coding    |
| MSTRG.178515.3  | LOC107984661 | XLOC_183751 | 12218 coding | coding    | coding    | coding    |
| XR_943504.2     | MOK          | XLOC_183759 | 2111 coding  | coding    | coding    | coding    |
| MSTRG.178546.1  | MOK          | XLOC_183761 | 253 coding   | noncoding | noncoding | noncoding |
| MSTRG.178547.1  | MOK          | XLOC_183762 | 232 coding   | noncoding | noncoding | noncoding |
| MSTRG.178618.4  | TRAF3        | XLOC_183782 | 2463 coding  | coding    | noncoding | coding    |
| MSTRG.178618.5  | TRAF3        | XLOC_183782 | 580 coding   | noncoding | noncoding | noncoding |
| MSTRG.178600.1  | CDC42BPB     | XLOC_183785 | 276 coding   | noncoding | noncoding | noncoding |
| MSTRG.178612.1  | CDC42BPB     | XLOC_183788 | 255 coding   | noncoding | noncoding | noncoding |
| MSTRG.178627.1  |              | XLOC_183795 | 227 coding   | noncoding | noncoding | noncoding |
| MSTRG.178672.1  |              | XLOC_183804 | 244 coding   | noncoding | noncoding | noncoding |
| MSTRG.178689.1  | LOC112268130 | XLOC_183808 | 1586 coding  | noncoding | coding    | coding    |
| MSTRG.178698.2  | PPP1R13B     | XLOC_183831 | 970 coding   | coding    | coding    | noncoding |
| MSTRG.178733.1  | TDRD9        | XLOC_183840 | 304 coding   | noncoding | noncoding | noncoding |
| MSTRG.178728.1  |              | XLOC_183852 | 247 coding   | noncoding | noncoding | noncoding |
| MSTRG.178812.1  |              | XLOC_183894 | 298 coding   | noncoding | noncoding | noncoding |
| MSTRG.178815.1  |              | XLOC_183896 | 270 coding   | noncoding | noncoding | noncoding |
| MSTRG.178864.1  | BRF1         | XLOC_183903 | 366 coding   | noncoding | noncoding | noncoding |
| MSTRG.178879.1  | PACS2        | XLOC_183914 | 287 coding   | coding    | noncoding | noncoding |
| MSTRG.178844.1  | TEDC1        | XLOC_183927 | 266 coding   | noncoding | noncoding | noncoding |
| MSTRG.178834.1  |              | XLOC_183930 | 318 coding   | noncoding | noncoding | noncoding |
| IGHG4           | IGHG4        | XLOC_183931 | 983 coding   | coding    | coding    | coding    |
| MSTRG.178897.1  |              | XLOC_183948 | 304 coding   | noncoding | noncoding | noncoding |
| MSTRG.178916.5  | HERC2P3      | XLOC_183960 | 2345 coding  | coding    | noncoding | noncoding |
| XM_017022654.2  | NIPA2        | XLOC_184000 | 3197 coding  | coding    | coding    | coding    |
| MSTRG.178974.1  |              | XLOC_184011 | 322 coding   | noncoding | noncoding | noncoding |
| MSTRG.179388.32 | UBE3A        | XLOC_184024 | 4456 coding  | coding    | noncoding | noncoding |
| MSTRG.179491.1  | SNHG14       | XLOC_184105 | 249 coding   | noncoding | noncoding | noncoding |
| MSTRG.179074.1  |              | XLOC_184134 | 293 coding   | noncoding | noncoding | noncoding |
| XM_017022055.1  | GABRA5       | XLOC_184148 | 6553 coding  | coding    | coding    | coding    |
| XM_011521431.3  | GABRG3       | XLOC_184151 | 9313 coding  | coding    | coding    | coding    |
| MSTRG.179133.1  | GABRG3       | XLOC_184156 | 516 coding   | noncoding | noncoding | noncoding |
| MSTRG.179134.1  | GABRG3       | XLOC_184157 | 285 coding   | noncoding | noncoding | noncoding |
| MSTRG.179158.1  | OCA2         | XLOC_184169 | 280 coding   | noncoding | noncoding | noncoding |
| MSTRG.179208.1  |              | XLOC_184195 | 498 coding   | noncoding | noncoding | noncoding |
| MSTRG.179291.2  | FAN1         | XLOC_184229 | 8437 coding  | coding    | coding    | coding    |
| MSTRG.179291.16 | FAN1         | XLOC_184229 | 5465 coding  | coding    | coding    | coding    |
| MSTRG.179286.1  | OTUD7A       | XLOC_184241 | 259 coding   | noncoding | noncoding | noncoding |
| MSTRG.179289.1  |              | XLOC_184246 | 243 coding   | noncoding | noncoding | noncoding |
| MSTRG.179318.1  | LINC02256    | XLOC_184264 | 276 coding   | noncoding | noncoding | noncoding |
| NM_199357.2     | ARHGAP11A    | XLOC_184266 | 2485 coding  | coding    | coding    | coding    |
| MSTRG.179325.1  |              | XLOC_184304 | 299 coding   | noncoding | noncoding | noncoding |

|                   |              |             |              |           |           |           |
|-------------------|--------------|-------------|--------------|-----------|-----------|-----------|
| MSTRG. 179539. 1  | RYS3         | XLOC_184308 | 281 coding   | noncoding | noncoding | noncoding |
| MSTRG. 179600. 13 | SLC12A6      | XLOC_184337 | 996 coding   | noncoding | noncoding | noncoding |
| MSTRG. 179576. 5  | LPCAT4       | XLOC_184341 | 225 coding   | noncoding | noncoding | noncoding |
| MSTRG. 179582. 1  |              | XLOC_184343 | 227 coding   | coding    | noncoding | noncoding |
| MSTRG. 179631. 1  |              | XLOC_184357 | 260 coding   | noncoding | noncoding | noncoding |
| MSTRG. 179661. 1  |              | XLOC_184409 | 218 coding   | noncoding | noncoding | noncoding |
| MSTRG. 179843. 1  | C15orf41     | XLOC_184438 | 233 coding   | noncoding | noncoding | noncoding |
| MSTRG. 179730. 1  | LOC105370772 | XLOC_184469 | 289 coding   | noncoding | noncoding | noncoding |
| MSTRG. 179734. 1  |              | XLOC_184473 | 258 coding   | noncoding | noncoding | noncoding |
| MSTRG. 179818. 1  |              | XLOC_184477 | 276 coding   | noncoding | noncoding | noncoding |
| NM_001330255. 1   | TMC05A       | XLOC_184481 | 1958 coding  | coding    | coding    | coding    |
| MSTRG. 179821. 1  |              | XLOC_184482 | 295 coding   | noncoding | noncoding | noncoding |
| MSTRG. 179840. 1  |              | XLOC_184490 | 254 coding   | noncoding | noncoding | noncoding |
| MSTRG. 179875. 1  |              | XLOC_184497 | 216 coding   | noncoding | noncoding | noncoding |
| MSTRG. 179902. 1  |              | XLOC_184499 | 289 coding   | noncoding | noncoding | noncoding |
| MSTRG. 179913. 1  | LOC107984725 | XLOC_184504 | 247 coding   | noncoding | noncoding | noncoding |
| MSTRG. 180058. 1  |              | XLOC_184548 | 234 coding   | coding    | noncoding | noncoding |
| MSTRG. 180105. 1  |              | XLOC_184594 | 294 coding   | noncoding | noncoding | noncoding |
| MSTRG. 180123. 1  | PAK6         | XLOC_184600 | 233 coding   | noncoding | noncoding | noncoding |
| MSTRG. 180154. 1  | PHGR1        | XLOC_184609 | 227 coding   | noncoding | noncoding | noncoding |
| MSTRG. 180164. 1  |              | XLOC_184615 | 245 coding   | noncoding | noncoding | noncoding |
| MSTRG. 180175. 1  |              | XLOC_184621 | 262 coding   | noncoding | noncoding | noncoding |
| MSTRG. 180230. 1  |              | XLOC_184645 | 206 coding   | noncoding | noncoding | noncoding |
| MSTRG. 180231. 1  |              | XLOC_184646 | 250 coding   | noncoding | noncoding | noncoding |
| MSTRG. 180256. 1  | DNAJC17      | XLOC_184657 | 258 coding   | noncoding | noncoding | noncoding |
| MSTRG. 180241. 1  | PPP1R14D     | XLOC_184660 | 224 coding   | noncoding | noncoding | noncoding |
| MSTRG. 180295. 1  | CHP1         | XLOC_184674 | 218 coding   | noncoding | noncoding | noncoding |
| MSTRG. 180296. 1  | CHP1         | XLOC_184675 | 284 coding   | noncoding | noncoding | noncoding |
| MSTRG. 180299. 1  | OIP5-AS1     | XLOC_184678 | 234 coding   | noncoding | noncoding | noncoding |
| MSTRG. 180305. 1  | NUSAP1       | XLOC_184681 | 241 coding   | noncoding | noncoding | noncoding |
| MSTRG. 180306. 1  |              | XLOC_184682 | 368 coding   | noncoding | noncoding | noncoding |
| MSTRG. 180310. 1  |              | XLOC_184684 | 249 coding   | noncoding | noncoding | noncoding |
| MSTRG. 180312. 1  |              | XLOC_184685 | 304 coding   | noncoding | noncoding | noncoding |
| MSTRG. 180314. 1  |              | XLOC_184686 | 270 coding   | noncoding | noncoding | noncoding |
| MSTRG. 180282. 1  | LTK          | XLOC_184691 | 460 coding   | noncoding | coding    | noncoding |
| NM_006293. 4      | TYRO3        | XLOC_184695 | 8032 coding  | coding    | coding    | coding    |
| MSTRG. 180327. 1  | MGA          | XLOC_184700 | 238 coding   | noncoding | noncoding | noncoding |
| NM_001114633. 1   | PLA2G4B      | XLOC_184706 | 2735 coding  | coding    | coding    | coding    |
| MSTRG. 180350. 1  | SPTBN5       | XLOC_184708 | 302 coding   | coding    | noncoding | noncoding |
| MSTRG. 180360. 1  | PLA2G4E      | XLOC_184712 | 240 coding   | noncoding | noncoding | noncoding |
| MSTRG. 180440. 1  | VPS39        | XLOC_184717 | 6248 coding  | coding    | coding    | noncoding |
| MSTRG. 180457. 1  |              | XLOC_184725 | 248 coding   | noncoding | noncoding | noncoding |
| XM_011521836. 2   | STARD9       | XLOC_184740 | 15914 coding | coding    | noncoding | coding    |

|                 |              |             |             |           |           |           |
|-----------------|--------------|-------------|-------------|-----------|-----------|-----------|
| MSTRG.180400.1  | TGM5         | XLOC_184759 | 309 coding  | noncoding | noncoding | noncoding |
| MSTRG.180509.1  | SERF2        | XLOC_184788 | 274 coding  | noncoding | noncoding | noncoding |
| MSTRG.180518.1  | WDR76        | XLOC_184794 | 229 coding  | noncoding | noncoding | noncoding |
| NM_177974.3     | CASC4        | XLOC_184807 | 3806 coding | noncoding | coding    | coding    |
| MSTRG.180581.1  |              | XLOC_184814 | 331 coding  | noncoding | noncoding | noncoding |
| NM_182985.5     | TRIM69       | XLOC_184838 | 1735 coding | coding    | coding    | coding    |
| MSTRG.180622.1  |              | XLOC_184844 | 306 coding  | noncoding | noncoding | noncoding |
| MSTRG.180645.1  | DUOX2        | XLOC_184867 | 318 coding  | coding    | noncoding | noncoding |
| MSTRG.180661.1  |              | XLOC_184886 | 227 coding  | noncoding | noncoding | noncoding |
| MSTRG.180686.1  | LOC107987223 | XLOC_184895 | 253 coding  | noncoding | noncoding | noncoding |
| MSTRG.180770.1  | BLOC1S6      | XLOC_184905 | 267 coding  | noncoding | noncoding | noncoding |
| MSTRG.180772.1  |              | XLOC_184907 | 296 coding  | noncoding | noncoding | noncoding |
| MSTRG.180733.1  | LOC105370802 | XLOC_184915 | 450 coding  | noncoding | noncoding | noncoding |
| MSTRG.180727.1  |              | XLOC_184921 | 300 coding  | noncoding | noncoding | noncoding |
| MSTRG.180752.1  |              | XLOC_184931 | 281 coding  | noncoding | noncoding | noncoding |
| MSTRG.180753.1  |              | XLOC_184932 | 417 coding  | coding    | noncoding | noncoding |
| MSTRG.180784.1  |              | XLOC_184939 | 265 coding  | noncoding | noncoding | noncoding |
| MSTRG.180792.1  | LINC01491    | XLOC_184953 | 253 coding  | noncoding | noncoding | noncoding |
| MSTRG.180813.1  | LOC105370805 | XLOC_184964 | 313 coding  | noncoding | noncoding | noncoding |
| MSTRG.180982.15 | SLC12A1      | XLOC_184977 | 9361 coding | coding    | noncoding | noncoding |
| MSTRG.180982.17 | SLC12A1      | XLOC_184977 | 2671 coding | coding    | noncoding | noncoding |
| MSTRG.180872.1  |              | XLOC_185024 | 260 coding  | noncoding | noncoding | noncoding |
| MSTRG.180874.1  |              | XLOC_185025 | 637 coding  | noncoding | noncoding | noncoding |
| NM_001352047.1  | GALK2        | XLOC_185035 | 2923 coding | coding    | coding    | coding    |
| MSTRG.181076.1  | GALK2        | XLOC_185040 | 404 coding  | noncoding | noncoding | noncoding |
| MSTRG.180946.1  | SLC27A2      | XLOC_185093 | 237 coding  | noncoding | noncoding | noncoding |
| MSTRG.180947.1  | SLC27A2      | XLOC_185094 | 359 coding  | noncoding | noncoding | noncoding |
| MSTRG.180959.1  |              | XLOC_185101 | 278 coding  | noncoding | noncoding | noncoding |
| MSTRG.180964.1  |              | XLOC_185102 | 961 coding  | coding    | coding    | coding    |
| MSTRG.181114.1  |              | XLOC_185118 | 219 coding  | noncoding | noncoding | noncoding |
| MSTRG.181170.1  |              | XLOC_185122 | 324 coding  | noncoding | noncoding | noncoding |
| NM_001252127.2  | AP4E1        | XLOC_185127 | 6766 coding | coding    | coding    | coding    |
| MSTRG.181158.1  | CYP19A1      | XLOC_185138 | 241 coding  | noncoding | noncoding | noncoding |
| XM_011521501.2  | GLDN         | XLOC_185145 | 6931 coding | coding    | coding    | coding    |
| MSTRG.181237.7  | DMXL2        | XLOC_185152 | 2426 coding | coding    | noncoding | noncoding |
| MSTRG.181254.1  | LOC105370816 | XLOC_185156 | 269 coding  | noncoding | noncoding | noncoding |
| XM_017022088.1  | TMOD3        | XLOC_185167 | 4475 coding | coding    | coding    | coding    |
| MSTRG.181206.1  | MAPK6        | XLOC_185182 | 274 coding  | noncoding | noncoding | noncoding |
| MSTRG.181278.1  | LOC107983981 | XLOC_185213 | 289 coding  | noncoding | noncoding | noncoding |
| MSTRG.181268.1  |              | XLOC_185220 | 276 coding  | noncoding | noncoding | noncoding |
| MSTRG.181297.1  | LOC105370826 | XLOC_185223 | 249 coding  | noncoding | noncoding | noncoding |
| MSTRG.181366.1  | UNC13C       | XLOC_185236 | 215 coding  | noncoding | noncoding | noncoding |
| MSTRG.181367.1  | UNC13C       | XLOC_185237 | 305 coding  | noncoding | noncoding | noncoding |

|                  |              |             |              |           |           |           |
|------------------|--------------|-------------|--------------|-----------|-----------|-----------|
| MSTRG. 181313. 1 |              | XLOC_185245 | 251 coding   | coding    | noncoding | noncoding |
| MSTRG. 181314. 1 |              | XLOC_185246 | 222 coding   | noncoding | noncoding | noncoding |
| MSTRG. 181415. 1 | PRTG         | XLOC_185279 | 250 coding   | noncoding | noncoding | noncoding |
| MSTRG. 181425. 1 |              | XLOC_185285 | 250 coding   | noncoding | noncoding | noncoding |
| MSTRG. 181718. 1 | TCF12        | XLOC_185356 | 267 coding   | noncoding | noncoding | noncoding |
| XM_017022685. 1  | CGNL1        | XLOC_185364 | 7858 coding  | coding    | coding    | coding    |
| MSTRG. 181547. 1 | CGNL1        | XLOC_185367 | 214 coding   | noncoding | noncoding | noncoding |
| MSTRG. 181551. 1 | CGNL1        | XLOC_185370 | 279 coding   | noncoding | noncoding | noncoding |
| MSTRG. 181665. 1 | GCOM1        | XLOC_185382 | 291 coding   | noncoding | noncoding | noncoding |
| MSTRG. 181560. 1 |              | XLOC_185384 | 261 coding   | noncoding | noncoding | noncoding |
| XM_017022176. 1  | LIPC         | XLOC_185465 | 3365 coding  | coding    | coding    | coding    |
| MSTRG. 182046. 1 | LIPC         | XLOC_185470 | 209 coding   | noncoding | noncoding | noncoding |
| XM_011521688. 2  | MINDY2       | XLOC_185476 | 9345 coding  | coding    | coding    | coding    |
| MSTRG. 181756. 1 | MINDY2       | XLOC_185478 | 234 coding   | noncoding | noncoding | noncoding |
| MSTRG. 181759. 1 | MINDY2       | XLOC_185481 | 263 coding   | noncoding | noncoding | noncoding |
| MSTRG. 181761. 1 |              | XLOC_185485 | 271 coding   | noncoding | noncoding | noncoding |
| MSTRG. 181765. 1 |              | XLOC_185486 | 279 coding   | noncoding | noncoding | noncoding |
| MSTRG. 181854. 1 | FAM81A       | XLOC_185509 | 379 coding   | noncoding | noncoding | noncoding |
| MSTRG. 181856. 1 | FAM81A       | XLOC_185510 | 251 coding   | noncoding | noncoding | noncoding |
| MSTRG. 181778. 1 |              | XLOC_185513 | 257 coding   | noncoding | noncoding | noncoding |
| MSTRG. 181813. 1 |              | XLOC_185522 | 282 coding   | noncoding | noncoding | noncoding |
| MSTRG. 181815. 1 |              | XLOC_185524 | 271 coding   | noncoding | noncoding | noncoding |
| MSTRG. 181818. 1 |              | XLOC_185527 | 701 coding   | noncoding | noncoding | noncoding |
| MSTRG. 181831. 1 |              | XLOC_185533 | 216 coding   | coding    | noncoding | noncoding |
| MSTRG. 182184. 7 | RORA-AS1     | XLOC_185541 | 13970 coding | coding    | noncoding | noncoding |
| MSTRG. 181896. 1 |              | XLOC_185595 | 276 coding   | noncoding | noncoding | noncoding |
| MSTRG. 181900. 1 |              | XLOC_185596 | 936 coding   | noncoding | noncoding | noncoding |
| MSTRG. 181905. 1 |              | XLOC_185601 | 237 coding   | noncoding | noncoding | noncoding |
| MSTRG. 182076. 1 | LOC105370855 | XLOC_185610 | 253 coding   | noncoding | noncoding | noncoding |
| MSTRG. 182093. 1 | LOC105370854 | XLOC_185614 | 237 coding   | noncoding | noncoding | noncoding |
| MSTRG. 182059. 1 |              | XLOC_185619 | 288 coding   | noncoding | noncoding | noncoding |
| XR_429442. 2     | LACTB        | XLOC_185620 | 1963 coding  | coding    | coding    | coding    |
| MSTRG. 182112. 1 | LOC101928972 | XLOC_185627 | 260 coding   | noncoding | noncoding | noncoding |
| MSTRG. 182167. 1 |              | XLOC_185645 | 314 coding   | noncoding | noncoding | noncoding |
| XM_017022765. 1  | USP3         | XLOC_185650 | 5740 coding  | coding    | coding    | coding    |
| MSTRG. 182336. 4 | HERC1        | XLOC_185658 | 13500 coding | coding    | coding    | coding    |
| MSTRG. 182300. 2 | LOC101928988 | XLOC_185662 | 1704 coding  | coding    | noncoding | coding    |
| NM_148955. 4     | SNX1         | XLOC_185665 | 8019 coding  | coding    | coding    | coding    |
| XM_017022581. 1  | SNX22        | XLOC_185669 | 3540 coding  | coding    | coding    | coding    |
| MSTRG. 182439. 5 | CSNK1G1      | XLOC_185670 | 1335 coding  | coding    | noncoding | noncoding |
| MSTRG. 182311. 1 |              | XLOC_185695 | 301 coding   | noncoding | noncoding | noncoding |
| MSTRG. 182323. 1 |              | XLOC_185701 | 281 coding   | noncoding | noncoding | noncoding |
| MSTRG. 182333. 1 |              | XLOC_185707 | 232 coding   | noncoding | noncoding | noncoding |

|                 |              |             |             |           |           |           |
|-----------------|--------------|-------------|-------------|-----------|-----------|-----------|
| MSTRG.182374.1  | KBTBD13      | XLOC_185719 | 348 coding  | noncoding | noncoding | noncoding |
| MSTRG.182502.1  | RNU5A-1      | XLOC_185741 | 235 coding  | noncoding | coding    | noncoding |
| MSTRG.182427.1  |              | XLOC_185743 | 399 coding  | noncoding | coding    | noncoding |
| MSTRG.182430.1  |              | XLOC_185748 | 282 coding  | noncoding | noncoding | noncoding |
| MSTRG.182504.9  | DPP8         | XLOC_185749 | 2004 coding | coding    | noncoding | noncoding |
| MSTRG.182504.10 | DPP8         | XLOC_185749 | 1354 coding | coding    | noncoding | noncoding |
| MSTRG.182597.29 | DENND4A      | XLOC_185755 | 243 coding  | noncoding | noncoding | noncoding |
| MSTRG.182597.37 | DENND4A      | XLOC_185755 | 4510 coding | coding    | noncoding | noncoding |
| MSTRG.182559.1  | MAP2K1       | XLOC_185776 | 303 coding  | noncoding | noncoding | noncoding |
| MSTRG.182546.1  |              | XLOC_185787 | 267 coding  | noncoding | noncoding | noncoding |
| MSTRG.182547.1  |              | XLOC_185788 | 315 coding  | noncoding | noncoding | noncoding |
| MSTRG.182571.1  |              | XLOC_185792 | 264 coding  | noncoding | noncoding | noncoding |
| MSTRG.182572.1  |              | XLOC_185793 | 302 coding  | noncoding | noncoding | noncoding |
| MSTRG.182582.1  | LOC102723493 | XLOC_185796 | 231 coding  | noncoding | noncoding | noncoding |
| MSTRG.182583.1  | LOC102723493 | XLOC_185797 | 229 coding  | noncoding | noncoding | noncoding |
| MSTRG.182762.1  | MAP2K5       | XLOC_185849 | 268 coding  | noncoding | noncoding | noncoding |
| MSTRG.182632.1  |              | XLOC_185872 | 267 coding  | noncoding | noncoding | noncoding |
| MSTRG.182639.1  |              | XLOC_185883 | 269 coding  | noncoding | coding    | noncoding |
| NM_001184780.2  | NOX5         | XLOC_185893 | 8423 coding | coding    | coding    | coding    |
| MSTRG.182808.1  | GLCE         | XLOC_185905 | 275 coding  | noncoding | noncoding | noncoding |
| MSTRG.182851.1  |              | XLOC_185943 | 247 coding  | noncoding | noncoding | noncoding |
| MSTRG.182919.1  |              | XLOC_185953 | 227 coding  | noncoding | noncoding | noncoding |
| MSTRG.182920.1  |              | XLOC_185954 | 263 coding  | noncoding | noncoding | noncoding |
| MSTRG.182926.1  |              | XLOC_185957 | 205 coding  | noncoding | noncoding | noncoding |
| MSTRG.182946.1  |              | XLOC_185965 | 284 coding  | noncoding | noncoding | noncoding |
| MSTRG.182997.1  | LRRC49       | XLOC_185986 | 315 coding  | noncoding | noncoding | noncoding |
| MSTRG.183018.1  | THSD4        | XLOC_185994 | 395 coding  | noncoding | noncoding | noncoding |
| MSTRG.183019.1  | THSD4        | XLOC_185995 | 281 coding  | noncoding | coding    | noncoding |
| MSTRG.183023.1  | THSD4        | XLOC_185999 | 293 coding  | noncoding | noncoding | noncoding |
| MSTRG.183029.1  | THSD4        | XLOC_186003 | 259 coding  | noncoding | noncoding | noncoding |
| MSTRG.183033.1  | THSD4        | XLOC_186005 | 218 coding  | noncoding | noncoding | noncoding |
| MSTRG.183109.2  | MYO9A        | XLOC_186011 | 5374 coding | coding    | noncoding | noncoding |
| MSTRG.183109.5  | MYO9A        | XLOC_186011 | 1085 coding | coding    | noncoding | noncoding |
| MSTRG.183131.1  | SENP8        | XLOC_186014 | 226 coding  | noncoding | noncoding | noncoding |
| NR_027262.1     | HEXA-AS1     | XLOC_186027 | 2676 coding | noncoding | noncoding | noncoding |
| MSTRG.183061.1  |              | XLOC_186029 | 424 coding  | noncoding | noncoding | noncoding |
| MSTRG.183155.9  | ADPGK-AS1    | XLOC_186055 | 2497 coding | coding    | coding    | noncoding |
| MSTRG.183164.1  | HCN4         | XLOC_186074 | 282 coding  | noncoding | noncoding | noncoding |
| MSTRG.183239.1  | TBC1D21      | XLOC_186103 | 296 coding  | noncoding | noncoding | noncoding |
| NM_001354988.2  | CSK          | XLOC_186151 | 2469 coding | coding    | coding    | coding    |
| MSTRG.183354.1  |              | XLOC_186162 | 296 coding  | noncoding | noncoding | noncoding |
| MSTRG.183443.1  |              | XLOC_186195 | 240 coding  | noncoding | noncoding | noncoding |
| MSTRG.183526.3  | SIN3A        | XLOC_186199 | 4989 coding | coding    | coding    | coding    |

|                |              |             |              |           |           |           |
|----------------|--------------|-------------|--------------|-----------|-----------|-----------|
| XR_932489.2    | LOC441728    | XLOC_186213 | 5236 coding  | coding    | coding    | coding    |
| MSTRG.183494.1 |              | XLOC_186231 | 261 coding   | noncoding | noncoding | noncoding |
| NM_002902.3    | RCN2         | XLOC_186236 | 6218 coding  | coding    | coding    | coding    |
| NM_018200.3    | HMG20A       | XLOC_186257 | 4135 coding  | coding    | coding    | coding    |
| MSTRG.183743.1 | HMG20A       | XLOC_186261 | 261 coding   | noncoding | noncoding | noncoding |
| MSTRG.183589.1 |              | XLOC_186285 | 285 coding   | noncoding | noncoding | noncoding |
| MSTRG.183686.6 | DNAJA4       | XLOC_186295 | 1854 coding  | noncoding | noncoding | coding    |
| MSTRG.183683.1 |              | XLOC_186304 | 251 coding   | noncoding | noncoding | noncoding |
| MSTRG.183708.1 | IREB2        | XLOC_186315 | 276 coding   | noncoding | noncoding | noncoding |
| MSTRG.183755.1 |              | XLOC_186327 | 218 coding   | noncoding | noncoding | noncoding |
| MSTRG.183757.1 |              | XLOC_186328 | 270 coding   | noncoding | noncoding | noncoding |
| MSTRG.183876.1 |              | XLOC_186399 | 260 coding   | noncoding | noncoding | noncoding |
| NM_001242917.1 | ZFAND6       | XLOC_186401 | 1659 coding  | coding    | noncoding | coding    |
| XM_024449872.1 | FAH          | XLOC_186415 | 1522 coding  | coding    | coding    | coding    |
| MSTRG.183888.1 | CTXND1       | XLOC_186417 | 260 coding   | noncoding | noncoding | noncoding |
| XM_006720408.2 | CFAP161      | XLOC_186438 | 1728 coding  | noncoding | coding    | coding    |
| NR_148035.1    | IL16         | XLOC_186440 | 8176 coding  | coding    | coding    | coding    |
| MSTRG.184099.1 | IL16         | XLOC_186442 | 277 coding   | noncoding | noncoding | noncoding |
| MSTRG.184036.1 |              | XLOC_186456 | 328 coding   | noncoding | noncoding | noncoding |
| MSTRG.184054.1 |              | XLOC_186457 | 251 coding   | noncoding | noncoding | noncoding |
| MSTRG.184064.1 |              | XLOC_186466 | 284 coding   | noncoding | noncoding | noncoding |
| MSTRG.184163.1 | SAXO2        | XLOC_186492 | 460 coding   | noncoding | noncoding | noncoding |
| MSTRG.184139.4 | RPS17        | XLOC_186498 | 504 coding   | coding    | noncoding | noncoding |
| NR_046096.1    | CPEB1-AS1    | XLOC_186501 | 2138 coding  | coding    | coding    | noncoding |
| XR_001751643.2 | LOC105370928 | XLOC_186519 | 6056 coding  | noncoding | noncoding | noncoding |
| MSTRG.184281.1 | C15orf40     | XLOC_186522 | 403 coding   | noncoding | coding    | noncoding |
| MSTRG.184198.1 | LOC105370932 | XLOC_186545 | 244 coding   | noncoding | noncoding | noncoding |
| MSTRG.184205.1 |              | XLOC_186548 | 212 coding   | noncoding | noncoding | noncoding |
| XM_024450000.1 | ADAMTSL3     | XLOC_186554 | 4805 coding  | coding    | coding    | coding    |
| MSTRG.184256.1 | ADAMTSL3     | XLOC_186561 | 336 coding   | noncoding | noncoding | noncoding |
| MSTRG.184257.1 | ADAMTSL3     | XLOC_186562 | 305 coding   | noncoding | noncoding | noncoding |
| MSTRG.184298.1 | GOLGA6LSP    | XLOC_186583 | 258 coding   | noncoding | noncoding | noncoding |
| MSTRG.184319.1 |              | XLOC_186600 | 256 coding   | noncoding | noncoding | noncoding |
| MSTRG.184356.8 | ZNF592       | XLOC_186614 | 411 coding   | noncoding | noncoding | noncoding |
| MSTRG.184332.1 |              | XLOC_186622 | 303 coding   | noncoding | noncoding | noncoding |
| NM_020778.4    | ALPK3        | XLOC_186623 | 10917 coding | coding    | coding    | coding    |
| XM_011522204.3 | SLC28A1      | XLOC_186624 | 2972 coding  | coding    | coding    | coding    |
| MSTRG.184344.1 | SLC28A1      | XLOC_186625 | 344 coding   | noncoding | noncoding | noncoding |
| MSTRG.184346.1 | SLC28A1      | XLOC_186626 | 260 coding   | noncoding | noncoding | noncoding |
| MSTRG.184367.1 |              | XLOC_186642 | 235 coding   | noncoding | noncoding | noncoding |
| MSTRG.184570.1 | AKAP13       | XLOC_186667 | 417 coding   | noncoding | noncoding | noncoding |
| MSTRG.184402.1 | MIR548AP     | XLOC_186685 | 296 coding   | noncoding | noncoding | noncoding |
| XM_011521226.3 | AGBL1        | XLOC_186697 | 12562 coding | coding    | coding    | coding    |

|                  |              |             |              |           |           |           |
|------------------|--------------|-------------|--------------|-----------|-----------|-----------|
| MSTRG. 184446. 1 |              | XLOC_186735 | 302 coding   | noncoding | noncoding | noncoding |
| MSTRG. 184503. 1 | LOC105370958 | XLOC_186750 | 286 coding   | noncoding | noncoding | noncoding |
| MSTRG. 184627. 1 |              | XLOC_186783 | 279 coding   | noncoding | noncoding | noncoding |
| NM_007011. 8     | ABHD2        | XLOC_186784 | 8822 coding  | coding    | coding    | coding    |
| MSTRG. 184656. 1 | ABHD2        | XLOC_186792 | 430 coding   | noncoding | noncoding | noncoding |
| MSTRG. 184665. 1 |              | XLOC_186809 | 262 coding   | noncoding | noncoding | noncoding |
| MSTRG. 184682. 1 | LINC00928    | XLOC_186812 | 254 coding   | noncoding | noncoding | noncoding |
| MSTRG. 184686. 1 | TICRR        | XLOC_186814 | 221 coding   | noncoding | noncoding | noncoding |
| MSTRG. 184694. 1 |              | XLOC_186819 | 272 coding   | noncoding | noncoding | noncoding |
| MSTRG. 184706. 1 |              | XLOC_186821 | 273 coding   | noncoding | noncoding | noncoding |
| MSTRG. 184720. 6 | AP3S2        | XLOC_186824 | 1177 coding  | coding    | noncoding | noncoding |
| MSTRG. 184718. 1 |              | XLOC_186829 | 252 coding   | noncoding | noncoding | noncoding |
| NM_198526. 4     | ZNF710       | XLOC_186837 | 4676 coding  | coding    | coding    | coding    |
| MSTRG. 184746. 1 | SEMA4B       | XLOC_186851 | 274 coding   | noncoding | noncoding | noncoding |
| MSTRG. 184739. 1 |              | XLOC_186858 | 211 coding   | noncoding | noncoding | noncoding |
| MSTRG. 184784. 1 |              | XLOC_186863 | 293 coding   | noncoding | noncoding | noncoding |
| MSTRG. 184786. 1 |              | XLOC_186864 | 232 coding   | noncoding | noncoding | noncoding |
| MSTRG. 184811. 1 | CRTC3        | XLOC_186870 | 317 coding   | noncoding | noncoding | noncoding |
| MSTRG. 184831. 1 | BLM          | XLOC_186883 | 627 coding   | noncoding | noncoding | noncoding |
| MSTRG. 184847. 1 |              | XLOC_186912 | 324 coding   | noncoding | noncoding | noncoding |
| MSTRG. 184848. 1 |              | XLOC_186913 | 250 coding   | noncoding | noncoding | noncoding |
| MSTRG. 185041. 1 | SLCO3A1      | XLOC_186932 | 293 coding   | noncoding | noncoding | noncoding |
| MSTRG. 184914. 1 | ST8SIA2      | XLOC_187004 | 230 coding   | noncoding | noncoding | noncoding |
| MSTRG. 184908. 1 |              | XLOC_187006 | 230 coding   | noncoding | noncoding | noncoding |
| MSTRG. 184919. 1 |              | XLOC_187019 | 347 coding   | noncoding | noncoding | noncoding |
| MSTRG. 184963. 1 | RGMA         | XLOC_187053 | 299 coding   | noncoding | noncoding | noncoding |
| MSTRG. 184965. 1 | RGMA         | XLOC_187055 | 214 coding   | noncoding | noncoding | noncoding |
| MSTRG. 184969. 1 | LOC101927025 | XLOC_187058 | 249 coding   | noncoding | noncoding | noncoding |
| MSTRG. 184971. 1 | LOC101927025 | XLOC_187059 | 247 coding   | noncoding | noncoding | noncoding |
| MSTRG. 184998. 1 | LOC105370982 | XLOC_187067 | 218 coding   | noncoding | noncoding | noncoding |
| MSTRG. 185006. 1 |              | XLOC_187075 | 387 coding   | noncoding | noncoding | noncoding |
| MSTRG. 185385. 1 | MCTP2        | XLOC_187130 | 296 coding   | noncoding | noncoding | noncoding |
| MSTRG. 185117. 1 |              | XLOC_187164 | 262 coding   | noncoding | noncoding | noncoding |
| MSTRG. 185149. 1 |              | XLOC_187175 | 243 coding   | noncoding | noncoding | noncoding |
| MSTRG. 185211. 1 | LOC105369212 | XLOC_187190 | 235 coding   | noncoding | noncoding | noncoding |
| MSTRG. 185216. 1 | NR2F2-AS1    | XLOC_187191 | 264 coding   | noncoding | noncoding | noncoding |
| MSTRG. 185220. 1 | NR2F2-AS1    | XLOC_187193 | 282 coding   | noncoding | noncoding | noncoding |
| MSTRG. 185223. 1 | NR2F2-AS1    | XLOC_187195 | 218 coding   | noncoding | noncoding | noncoding |
| MSTRG. 185232. 1 |              | XLOC_187210 | 285 coding   | noncoding | noncoding | noncoding |
| MSTRG. 185289. 1 |              | XLOC_187241 | 236 coding   | noncoding | noncoding | noncoding |
| NM_001291858. 2  | IGF1R        | XLOC_187264 | 12232 coding | coding    | coding    | coding    |
| MSTRG. 185323. 1 |              | XLOC_187333 | 233 coding   | noncoding | noncoding | noncoding |
| MSTRG. 185325. 1 |              | XLOC_187334 | 291 coding   | noncoding | noncoding | noncoding |

|                |              |             |             |           |           |           |
|----------------|--------------|-------------|-------------|-----------|-----------|-----------|
| MSTRG.185435.1 | TTC23        | XLOC_187341 | 437 coding  | noncoding | noncoding | noncoding |
| MSTRG.185438.1 | TTC23        | XLOC_187343 | 313 coding  | noncoding | noncoding | noncoding |
| MSTRG.185508.1 | LOC400464    | XLOC_187400 | 216 coding  | noncoding | noncoding | noncoding |
| MSTRG.185616.1 | ADAMTS17     | XLOC_187423 | 248 coding  | noncoding | noncoding | noncoding |
| MSTRG.185709.1 |              | XLOC_187508 | 231 coding  | noncoding | noncoding | noncoding |
| MSTRG.185714.1 |              | XLOC_187509 | 266 coding  | noncoding | noncoding | noncoding |
| MSTRG.185735.1 |              | XLOC_187524 | 272 coding  | noncoding | noncoding | noncoding |
| XR_948846.2    | LOC105379208 | XLOC_187559 | 1628 coding | noncoding | noncoding | noncoding |
| XR_001751434.1 | LOC107984786 | XLOC_187570 | 1300 coding | noncoding | coding    | noncoding |
| MSTRG.178943.1 | LOC101928039 | XLOC_187573 | 271 coding  | noncoding | noncoding | noncoding |
| MSTRG.178948.1 |              | XLOC_187578 | 297 coding  | coding    | noncoding | noncoding |
| NR_033350.1    | GOLGA8EP     | XLOC_187579 | 5269 coding | coding    | coding    | coding    |
| MSTRG.178949.1 |              | XLOC_187580 | 555 coding  | coding    | noncoding | noncoding |
| MSTRG.178952.1 | HERC2P2      | XLOC_187583 | 332 coding  | noncoding | noncoding | noncoding |
| MSTRG.178990.1 |              | XLOC_187620 | 226 coding  | noncoding | noncoding | noncoding |
| MSTRG.179392.1 | SNRPN        | XLOC_187626 | 262 coding  | noncoding | noncoding | noncoding |
| MSTRG.179492.1 | SNHG14       | XLOC_187645 | 694 coding  | noncoding | coding    | noncoding |
| MSTRG.179066.1 | LINC02250    | XLOC_187672 | 245 coding  | noncoding | noncoding | noncoding |
| MSTRG.179069.1 | LINC02250    | XLOC_187675 | 271 coding  | noncoding | noncoding | noncoding |
| MSTRG.179058.1 |              | XLOC_187677 | 298 coding  | coding    | noncoding | noncoding |
| MSTRG.179073.1 |              | XLOC_187695 | 293 coding  | noncoding | noncoding | noncoding |
| MSTRG.179102.1 | GABRB3       | XLOC_187708 | 285 coding  | noncoding | noncoding | noncoding |
| XR_002957720.1 | LOC112268151 | XLOC_187713 | 6997 coding | noncoding | noncoding | noncoding |
| MSTRG.179117.1 |              | XLOC_187736 | 250 coding  | noncoding | noncoding | noncoding |
| NM_001368078.1 | GOLGA8G      | XLOC_187747 | 5276 coding | coding    | coding    | coding    |
| MSTRG.179272.5 | KLF13        | XLOC_187795 | 7216 coding | coding    | coding    | coding    |
| MSTRG.179530.1 | RYR3         | XLOC_187835 | 294 coding  | noncoding | noncoding | noncoding |
| MSTRG.179534.1 | RYR3         | XLOC_187839 | 216 coding  | noncoding | noncoding | noncoding |
| MSTRG.179545.1 | RYR3         | XLOC_187846 | 232 coding  | noncoding | noncoding | noncoding |
| MSTRG.179528.1 | KATNB1       | XLOC_187870 | 282 coding  | noncoding | noncoding | noncoding |
| NR_027410.1    | GOLGA8B      | XLOC_187883 | 6519 coding | coding    | coding    | coding    |
| MSTRG.179581.1 |              | XLOC_187887 | 298 coding  | noncoding | noncoding | noncoding |
| NM_020660.3    | GJD2         | XLOC_187892 | 2922 coding | coding    | coding    | coding    |
| MSTRG.179667.1 |              | XLOC_187951 | 236 coding  | noncoding | noncoding | noncoding |
| MSTRG.179674.1 |              | XLOC_187952 | 316 coding  | coding    | noncoding | noncoding |
| MSTRG.179688.1 |              | XLOC_187958 | 280 coding  | coding    | noncoding | noncoding |
| MSTRG.179691.1 |              | XLOC_187961 | 315 coding  | noncoding | noncoding | noncoding |
| NM_170677.5    | MEIS2        | XLOC_187997 | 5582 coding | coding    | coding    | coding    |
| MSTRG.179806.1 | MEIS2        | XLOC_188000 | 284 coding  | noncoding | noncoding | noncoding |
| MSTRG.179724.1 |              | XLOC_188003 | 270 coding  | noncoding | noncoding | noncoding |
| MSTRG.179727.1 |              | XLOC_188005 | 273 coding  | noncoding | noncoding | noncoding |
| MSTRG.179820.1 |              | XLOC_188011 | 269 coding  | noncoding | noncoding | noncoding |
| MSTRG.179824.1 |              | XLOC_188018 | 281 coding  | noncoding | noncoding | noncoding |

|                 |          |             |              |           |           |           |
|-----------------|----------|-------------|--------------|-----------|-----------|-----------|
| MSTRG.179874.1  |          | XLOC_188041 | 265 coding   | coding    | noncoding | noncoding |
| XM_011521151.3  | RASGRP1  | XLOC_188043 | 4614 coding  | coding    | coding    | coding    |
| NM_005739.4     | RASGRP1  | XLOC_188043 | 5031 coding  | coding    | coding    | coding    |
| MSTRG.179901.1  |          | XLOC_188044 | 545 coding   | noncoding | coding    | noncoding |
| MSTRG.179908.1  |          | XLOC_188049 | 239 coding   | noncoding | noncoding | noncoding |
| MSTRG.180045.1  |          | XLOC_188147 | 314 coding   | noncoding | noncoding | noncoding |
| MSTRG.180081.1  | GPR176   | XLOC_188158 | 281 coding   | noncoding | noncoding | noncoding |
| NM_001080792.3  | CCDC32   | XLOC_188213 | 1695 coding  | coding    | coding    | coding    |
| MSTRG.180206.1  | RAD51    | XLOC_188225 | 245 coding   | noncoding | noncoding | noncoding |
| MSTRG.180208.1  |          | XLOC_188229 | 219 coding   | noncoding | noncoding | noncoding |
| MSTRG.180274.1  | INO80    | XLOC_188245 | 238 coding   | noncoding | noncoding | noncoding |
| MSTRG.180277.1  | INO80    | XLOC_188248 | 339 coding   | noncoding | noncoding | noncoding |
| XM_011521298.2  | EXD1     | XLOC_188251 | 3469 coding  | coding    | coding    | coding    |
| MSTRG.180291.1  | EXD1     | XLOC_188252 | 227 coding   | noncoding | noncoding | noncoding |
| MSTRG.180293.6  | OIP5-AS1 | XLOC_188253 | 8014 coding  | noncoding | noncoding | noncoding |
| MSTRG.180303.4  | NUSAP1   | XLOC_188256 | 1345 coding  | coding    | noncoding | noncoding |
| MSTRG.180311.1  |          | XLOC_188259 | 283 coding   | noncoding | noncoding | noncoding |
| MSTRG.180313.1  |          | XLOC_188260 | 304 coding   | noncoding | noncoding | noncoding |
| MSTRG.180280.1  | ITPKA    | XLOC_188264 | 261 coding   | noncoding | noncoding | noncoding |
| XM_017022181.1  | LTK      | XLOC_188265 | 3193 coding  | coding    | coding    | coding    |
| MSTRG.180289.1  |          | XLOC_188269 | 288 coding   | noncoding | noncoding | noncoding |
| MSTRG.180322.12 | MGA      | XLOC_188270 | 6414 coding  | coding    | coding    | noncoding |
| MSTRG.180345.5  | PLA2G4F  | XLOC_188292 | 431 coding   | noncoding | coding    | noncoding |
| XM_011521404.2  | VPS39    | XLOC_188293 | 4929 coding  | coding    | coding    | coding    |
| MSTRG.180443.1  | VPS39    | XLOC_188295 | 310 coding   | noncoding | noncoding | noncoding |
| NM_001366846.2  | ZNF106   | XLOC_188312 | 10521 coding | coding    | coding    | coding    |
| MSTRG.180477.1  | ZNF106   | XLOC_188315 | 268 coding   | noncoding | noncoding | noncoding |
| MSTRG.180479.1  | ZNF106   | XLOC_188317 | 204 coding   | noncoding | noncoding | noncoding |
| MSTRG.180366.1  | STARD9   | XLOC_188324 | 255 coding   | coding    | noncoding | noncoding |
| MSTRG.180389.9  | CDAN1    | XLOC_188342 | 457 coding   | noncoding | noncoding | noncoding |
| XM_024449851.1  | TTBK2    | XLOC_188344 | 6798 coding  | coding    | coding    | coding    |
| MSTRG.180413.1  | TTBK2    | XLOC_188345 | 375 coding   | noncoding | noncoding | noncoding |
| MSTRG.180427.1  | UBR1     | XLOC_188358 | 366 coding   | noncoding | noncoding | noncoding |
| NM_153700.2     | STRC     | XLOC_188387 | 5515 coding  | noncoding | coding    | coding    |
| NM_172095.4     | CATSPER2 | XLOC_188388 | 4009 coding  | coding    | coding    | coding    |
| NR_146078.1     | STRCP1   | XLOC_188392 | 5415 coding  | noncoding | coding    | coding    |
| MSTRG.180508.1  | SERF2    | XLOC_188396 | 292 coding   | noncoding | noncoding | noncoding |
| MSTRG.180568.1  | FRMD5    | XLOC_188410 | 256 coding   | noncoding | noncoding | noncoding |
| MSTRG.180571.1  | FRMD5    | XLOC_188411 | 292 coding   | noncoding | noncoding | noncoding |
| MSTRG.180577.1  | FRMD5    | XLOC_188414 | 236 coding   | noncoding | noncoding | noncoding |
| MSTRG.180523.1  |          | XLOC_188419 | 287 coding   | noncoding | noncoding | noncoding |
| MSTRG.180591.2  | CTDSPL2  | XLOC_188422 | 1503 coding  | noncoding | coding    | noncoding |
| MSTRG.180713.2  | EIF3J    | XLOC_188425 | 2183 coding  | coding    | noncoding | noncoding |

|                |              |             |             |           |           |           |
|----------------|--------------|-------------|-------------|-----------|-----------|-----------|
| MSTRG.180621.1 |              | XLOC_188439 | 283 coding  | noncoding | noncoding | noncoding |
| MSTRG.180660.1 |              | XLOC_188459 | 234 coding  | noncoding | noncoding | noncoding |
| MSTRG.180688.1 | LOC105376714 | XLOC_188466 | 236 coding  | noncoding | noncoding | noncoding |
| MSTRG.180708.1 | HMG2P46      | XLOC_188468 | 277 coding  | noncoding | noncoding | noncoding |
| MSTRG.180751.1 |              | XLOC_188484 | 281 coding  | noncoding | noncoding | noncoding |
| MSTRG.180754.1 |              | XLOC_188485 | 282 coding  | noncoding | noncoding | noncoding |
| MSTRG.180787.1 |              | XLOC_188493 | 222 coding  | noncoding | noncoding | noncoding |
| MSTRG.180820.1 | SEMA6D       | XLOC_188498 | 405 coding  | noncoding | noncoding | noncoding |
| MSTRG.180791.1 | LINC01491    | XLOC_188509 | 253 coding  | noncoding | noncoding | noncoding |
| NM_001194998.2 | CEP152       | XLOC_188560 | 5560 coding | noncoding | coding    | coding    |
| MSTRG.180883.1 | CEP152       | XLOC_188562 | 250 coding  | noncoding | noncoding | noncoding |
| MSTRG.180862.1 |              | XLOC_188576 | 248 coding  | noncoding | noncoding | noncoding |
| MSTRG.180924.1 | SECISBP2L    | XLOC_188580 | 256 coding  | noncoding | noncoding | noncoding |
| MSTRG.180871.1 |              | XLOC_188588 | 260 coding  | noncoding | noncoding | noncoding |
| MSTRG.180918.1 |              | XLOC_188590 | 208 coding  | noncoding | noncoding | noncoding |
| MSTRG.180958.1 |              | XLOC_188642 | 278 coding  | noncoding | noncoding | noncoding |
| MSTRG.180965.1 |              | XLOC_188643 | 283 coding  | coding    | noncoding | noncoding |
| MSTRG.181013.1 |              | XLOC_188646 | 251 coding  | noncoding | noncoding | noncoding |
| XR_001751328.2 | TRPM7        | XLOC_188648 | 7196 coding | coding    | coding    | coding    |
| XM_017022353.2 | TRPM7        | XLOC_188648 | 6940 coding | coding    | coding    | coding    |
| MSTRG.181112.1 |              | XLOC_188662 | 227 coding  | noncoding | noncoding | noncoding |
| MSTRG.181143.1 | GLDN         | XLOC_188681 | 264 coding  | noncoding | noncoding | noncoding |
| MSTRG.181199.1 | LOC112268149 | XLOC_188713 | 235 coding  | noncoding | noncoding | noncoding |
| MSTRG.181211.1 | LOC112268150 | XLOC_188719 | 282 coding  | noncoding | noncoding | noncoding |
| XM_017021867.2 | GNB5         | XLOC_188721 | 4589 coding | coding    | coding    | coding    |
| MSTRG.181447.1 | MYO5C        | XLOC_188726 | 258 coding  | noncoding | noncoding | noncoding |
| MSTRG.181470.1 | MYO5A        | XLOC_188743 | 217 coding  | noncoding | noncoding | noncoding |
| NM_001306196.2 | ARPP19       | XLOC_188757 | 5423 coding | coding    | noncoding | noncoding |
| MSTRG.181256.1 |              | XLOC_188759 | 381 coding  | noncoding | noncoding | noncoding |
| MSTRG.181276.1 | LOC107983981 | XLOC_188797 | 226 coding  | noncoding | noncoding | noncoding |
| MSTRG.181280.1 | LOC107983981 | XLOC_188799 | 284 coding  | noncoding | noncoding | noncoding |
| MSTRG.181298.1 | LOC105370826 | XLOC_188808 | 249 coding  | noncoding | noncoding | noncoding |
| MSTRG.181302.1 | WDR72        | XLOC_188811 | 292 coding  | noncoding | noncoding | noncoding |
| MSTRG.181390.1 |              | XLOC_188830 | 255 coding  | noncoding | noncoding | noncoding |
| MSTRG.181389.1 |              | XLOC_188835 | 210 coding  | coding    | noncoding | noncoding |
| MSTRG.181414.1 | PRTG         | XLOC_188869 | 313 coding  | noncoding | noncoding | noncoding |
| MSTRG.181417.1 | PRTG         | XLOC_188871 | 429 coding  | noncoding | noncoding | noncoding |
| MSTRG.181418.1 | PRTG         | XLOC_188872 | 421 coding  | noncoding | noncoding | noncoding |
| MSTRG.181412.1 |              | XLOC_188873 | 273 coding  | noncoding | noncoding | noncoding |
| MSTRG.181432.1 | NEDD4        | XLOC_188878 | 268 coding  | noncoding | noncoding | noncoding |
| MSTRG.181424.1 |              | XLOC_188882 | 250 coding  | noncoding | noncoding | noncoding |
| MSTRG.181602.3 | TEX9         | XLOC_188919 | 601 coding  | noncoding | noncoding | noncoding |
| MSTRG.181626.1 |              | XLOC_188945 | 241 coding  | noncoding | noncoding | noncoding |

|                 |              |             |              |           |           |           |
|-----------------|--------------|-------------|--------------|-----------|-----------|-----------|
| MSTRG.181685.3  | TCF12        | XLOC_188953 | 2395 coding  | coding    | noncoding | noncoding |
| MSTRG.181530.1  |              | XLOC_188960 | 269 coding   | noncoding | noncoding | noncoding |
| MSTRG.181640.1  |              | XLOC_188988 | 286 coding   | coding    | noncoding | noncoding |
| MSTRG.181917.1  | ALDH1A2      | XLOC_188991 | 217 coding   | noncoding | noncoding | noncoding |
| MSTRG.181996.1  |              | XLOC_189007 | 312 coding   | noncoding | noncoding | noncoding |
| MSTRG.181763.1  |              | XLOC_189074 | 409 coding   | noncoding | noncoding | noncoding |
| MSTRG.181764.1  |              | XLOC_189075 | 305 coding   | noncoding | noncoding | noncoding |
| MSTRG.181812.1  |              | XLOC_189113 | 252 coding   | noncoding | noncoding | noncoding |
| NM_001002858.3  | ANXA2        | XLOC_189124 | 1626 coding  | coding    | coding    | coding    |
| XR_002957757.1  | LOC107984805 | XLOC_189185 | 14997 coding | noncoding | noncoding | noncoding |
| MSTRG.182273.1  | RORA         | XLOC_189187 | 208 coding   | noncoding | noncoding | noncoding |
| NM_017684.5     | VPS13C       | XLOC_189206 | 13274 coding | coding    | noncoding | coding    |
| MSTRG.182124.10 | VPS13C       | XLOC_189206 | 516 coding   | noncoding | noncoding | noncoding |
| MSTRG.181897.1  |              | XLOC_189230 | 295 coding   | noncoding | noncoding | noncoding |
| MSTRG.181901.1  |              | XLOC_189233 | 283 coding   | noncoding | noncoding | noncoding |
| MSTRG.181903.1  |              | XLOC_189236 | 229 coding   | noncoding | noncoding | noncoding |
| MSTRG.181906.1  |              | XLOC_189245 | 393 coding   | noncoding | noncoding | noncoding |
| MSTRG.181907.1  |              | XLOC_189246 | 242 coding   | noncoding | noncoding | noncoding |
| MSTRG.182079.1  | TLN2         | XLOC_189257 | 245 coding   | noncoding | noncoding | noncoding |
| MSTRG.182052.1  |              | XLOC_189270 | 255 coding   | noncoding | noncoding | noncoding |
| MSTRG.182061.4  | TPM1-AS      | XLOC_189275 | 1339 coding  | coding    | coding    | noncoding |
| XM_017022052.1  | DAPK2        | XLOC_189328 | 4617 coding  | noncoding | coding    | coding    |
| MSTRG.182437.1  | PPIB         | XLOC_189340 | 1440 coding  | coding    | coding    | noncoding |
| MSTRG.182452.1  | CSNK1G1      | XLOC_189354 | 478 coding   | noncoding | noncoding | noncoding |
| MSTRG.182317.1  | RBPMS2       | XLOC_189375 | 280 coding   | noncoding | noncoding | noncoding |
| MSTRG.182318.1  | RBPMS2       | XLOC_189376 | 276 coding   | noncoding | noncoding | noncoding |
| MSTRG.182310.1  |              | XLOC_189378 | 331 coding   | noncoding | noncoding | noncoding |
| MSTRG.182322.1  |              | XLOC_189381 | 281 coding   | noncoding | noncoding | noncoding |
| MSTRG.182328.1  |              | XLOC_189384 | 227 coding   | noncoding | noncoding | noncoding |
| MSTRG.182330.1  |              | XLOC_189386 | 253 coding   | noncoding | noncoding | noncoding |
| MSTRG.182380.1  |              | XLOC_189393 | 258 coding   | noncoding | noncoding | noncoding |
| MSTRG.182397.1  |              | XLOC_189406 | 234 coding   | noncoding | noncoding | noncoding |
| MSTRG.182369.1  |              | XLOC_189410 | 264 coding   | noncoding | noncoding | noncoding |
| MSTRG.182496.1  | LOC112268147 | XLOC_189422 | 264 coding   | noncoding | noncoding | noncoding |
| NM_001320835.1  | DENND4A      | XLOC_189444 | 8837 coding  | coding    | coding    | coding    |
| MSTRG.182604.18 | DENND4A      | XLOC_189444 | 4243 coding  | coding    | coding    | coding    |
| MSTRG.182626.1  | LOC105370866 | XLOC_189461 | 251 coding   | noncoding | noncoding | noncoding |
| MSTRG.182561.1  | RPL4         | XLOC_189470 | 1490 coding  | coding    | coding    | coding    |
| MSTRG.182532.1  | LINC01169    | XLOC_189478 | 247 coding   | noncoding | noncoding | noncoding |
| MSTRG.182548.1  |              | XLOC_189485 | 324 coding   | noncoding | noncoding | noncoding |
| MSTRG.182576.1  |              | XLOC_189492 | 325 coding   | noncoding | noncoding | noncoding |
| MSTRG.182577.1  |              | XLOC_189495 | 220 coding   | noncoding | noncoding | noncoding |
| MSTRG.182710.1  | IQCH         | XLOC_189511 | 299 coding   | noncoding | noncoding | noncoding |

|                |            |             |             |           |           |           |
|----------------|------------|-------------|-------------|-----------|-----------|-----------|
| NR_040051.1    | IQCH-AS1   | XLOC_189512 | 5960 coding | noncoding | coding    | noncoding |
| MSTRG.182636.1 |            | XLOC_189528 | 314 coding  | noncoding | noncoding | noncoding |
| NR_026808.1    | ANP32A-IT1 | XLOC_189564 | 3281 coding | noncoding | coding    | noncoding |
| MSTRG.182758.1 |            | XLOC_189576 | 233 coding  | noncoding | noncoding | noncoding |
| MSTRG.182793.1 | NOX5       | XLOC_189578 | 791 coding  | noncoding | noncoding | noncoding |
| MSTRG.182832.1 |            | XLOC_189597 | 254 coding  | noncoding | noncoding | noncoding |
| MSTRG.182852.1 |            | XLOC_189641 | 247 coding  | noncoding | noncoding | noncoding |
| MSTRG.182918.1 |            | XLOC_189664 | 227 coding  | noncoding | noncoding | noncoding |
| MSTRG.182953.1 |            | XLOC_189679 | 444 coding  | noncoding | noncoding | noncoding |
| MSTRG.183041.1 | THSD4      | XLOC_189722 | 423 coding  | noncoding | noncoding | noncoding |
| NM_005477.3    | HCN4       | XLOC_189835 | 6922 coding | coding    | coding    | coding    |
| MSTRG.183260.1 | REC114     | XLOC_189840 | 261 coding  | noncoding | noncoding | noncoding |
| XR_001751216.1 | NPTN       | XLOC_189844 | 2606 coding | coding    | coding    | coding    |
| XM_005254369.4 | INSYN1     | XLOC_189855 | 6996 coding | coding    | coding    | coding    |
| MSTRG.183286.1 | GOLGA6A    | XLOC_189876 | 283 coding  | noncoding | noncoding | noncoding |
| MSTRG.183290.1 | ISLR2      | XLOC_189880 | 344 coding  | noncoding | noncoding | noncoding |
| NM_001146030.2 | SEMA7A     | XLOC_189887 | 3278 coding | coding    | coding    | coding    |
| MSTRG.183323.1 |            | XLOC_189901 | 217 coding  | noncoding | noncoding | noncoding |
| MSTRG.183348.1 | SCAMP2     | XLOC_189913 | 263 coding  | noncoding | noncoding | noncoding |
| MSTRG.183352.1 |            | XLOC_189918 | 215 coding  | noncoding | noncoding | noncoding |
| MSTRG.183353.1 |            | XLOC_189921 | 237 coding  | noncoding | noncoding | noncoding |
| MSTRG.183355.1 |            | XLOC_189922 | 296 coding  | noncoding | noncoding | noncoding |
| MSTRG.183436.1 |            | XLOC_189945 | 282 coding  | noncoding | noncoding | noncoding |
| MSTRG.183451.6 |            | XLOC_189963 | 2045 coding | noncoding | coding    | noncoding |
| MSTRG.183523.1 | NEIL1      | XLOC_189972 | 359 coding  | noncoding | coding    | noncoding |
| MSTRG.183528.1 | SIN3A      | XLOC_189976 | 218 coding  | noncoding | noncoding | noncoding |
| NM_002833.4    | PTPN9      | XLOC_189981 | 7839 coding | coding    | coding    | coding    |
| MSTRG.183540.1 | PTPN9      | XLOC_189986 | 671 coding  | noncoding | coding    | noncoding |
| MSTRG.183459.1 |            | XLOC_189988 | 313 coding  | noncoding | noncoding | noncoding |
| NM_001897.5    | CSPG4      | XLOC_189995 | 8290 coding | coding    | coding    | coding    |
| MSTRG.183486.1 | LOC441728  | XLOC_190002 | 314 coding  | noncoding | noncoding | noncoding |
| MSTRG.183495.1 |            | XLOC_190024 | 261 coding  | noncoding | noncoding | noncoding |
| MSTRG.183643.1 | SCAPER     | XLOC_190035 | 243 coding  | coding    | noncoding | noncoding |
| MSTRG.183669.1 | SCAPER     | XLOC_190060 | 258 coding  | noncoding | noncoding | noncoding |
| MSTRG.183564.1 |            | XLOC_190073 | 271 coding  | noncoding | noncoding | noncoding |
| MSTRG.183581.1 |            | XLOC_190100 | 239 coding  | noncoding | noncoding | noncoding |
| MSTRG.183582.1 |            | XLOC_190101 | 283 coding  | noncoding | noncoding | noncoding |
| MSTRG.183590.1 |            | XLOC_190108 | 285 coding  | noncoding | noncoding | noncoding |
| MSTRG.183617.1 |            | XLOC_190115 | 303 coding  | noncoding | noncoding | noncoding |
| MSTRG.183677.1 |            | XLOC_190125 | 288 coding  | noncoding | noncoding | noncoding |
| MSTRG.183710.1 | CHRNA5     | XLOC_190134 | 338 coding  | noncoding | noncoding | noncoding |
| MSTRG.183725.1 |            | XLOC_190143 | 286 coding  | noncoding | noncoding | noncoding |
| MSTRG.183776.1 | CTSH       | XLOC_190157 | 235 coding  | noncoding | noncoding | noncoding |

|                   |              |             |              |           |           |           |
|-------------------|--------------|-------------|--------------|-----------|-----------|-----------|
| MSTRG. 183966. 1  |              | XLOC_190225 | 556 coding   | noncoding | noncoding | noncoding |
| MSTRG. 183889. 1  | CTXND1       | XLOC_190267 | 260 coding   | noncoding | noncoding | noncoding |
| MSTRG. 183897. 1  | LINC00927    | XLOC_190271 | 253 coding   | noncoding | noncoding | noncoding |
| XR_001751630. 2   | LOC107984749 | XLOC_190300 | 3691 coding  | noncoding | noncoding | noncoding |
| MSTRG. 184016. 2  | TLNRD1       | XLOC_190310 | 2175 coding  | noncoding | coding    | noncoding |
| MSTRG. 184098. 1  | IL16         | XLOC_190327 | 277 coding   | noncoding | noncoding | noncoding |
| MSTRG. 184100. 5  | STARD5       | XLOC_190328 | 8327 coding  | coding    | coding    | noncoding |
| MSTRG. 184100. 12 | STARD5       | XLOC_190328 | 9384 coding  | coding    | coding    | coding    |
| MSTRG. 184075. 1  |              | XLOC_190350 | 215 coding   | noncoding | noncoding | noncoding |
| MSTRG. 184126. 1  | LINC01583    | XLOC_190358 | 220 coding   | noncoding | noncoding | noncoding |
| MSTRG. 184148. 1  | EFL1         | XLOC_190365 | 284 coding   | noncoding | noncoding | noncoding |
| MSTRG. 184140. 1  | RPS17        | XLOC_190391 | 511 coding   | coding    | coding    | coding    |
| MSTRG. 184276. 1  | HOMER2       | XLOC_190410 | 331 coding   | noncoding | noncoding | noncoding |
| MSTRG. 184193. 1  |              | XLOC_190421 | 257 coding   | noncoding | noncoding | noncoding |
| MSTRG. 184202. 1  | LOC105370932 | XLOC_190427 | 363 coding   | noncoding | noncoding | noncoding |
| MSTRG. 184195. 1  |              | XLOC_190428 | 268 coding   | noncoding | noncoding | noncoding |
| MSTRG. 184207. 1  |              | XLOC_190431 | 235 coding   | noncoding | noncoding | noncoding |
| MSTRG. 184318. 1  |              | XLOC_190457 | 256 coding   | noncoding | noncoding | noncoding |
| MSTRG. 184355. 5  | ZNF592       | XLOC_190465 | 8608 coding  | coding    | coding    | coding    |
| MSTRG. 184345. 1  | SLC28A1      | XLOC_190478 | 301 coding   | noncoding | noncoding | noncoding |
| MSTRG. 184369. 1  |              | XLOC_190485 | 262 coding   | noncoding | noncoding | noncoding |
| MSTRG. 184403. 1  |              | XLOC_190496 | 296 coding   | noncoding | noncoding | noncoding |
| MSTRG. 184484. 1  | AGBL1        | XLOC_190519 | 263 coding   | noncoding | coding    | noncoding |
| MSTRG. 184445. 1  |              | XLOC_190539 | 302 coding   | noncoding | noncoding | noncoding |
| XM_017022254. 2   | NTRK3        | XLOC_190544 | 20382 coding | coding    | coding    | coding    |
| XM_024449935. 1   | NTRK3        | XLOC_190544 | 2316 coding  | coding    | coding    | coding    |
| XM_006720549. 4   | NTRK3        | XLOC_190544 | 2211 coding  | coding    | coding    | coding    |
| MSTRG. 184525. 1  | NTRK3        | XLOC_190550 | 248 coding   | noncoding | noncoding | noncoding |
| MSTRG. 184504. 1  | LOC105370958 | XLOC_190554 | 286 coding   | noncoding | noncoding | noncoding |
| MSTRG. 184617. 1  | ACAN         | XLOC_190595 | 467 coding   | noncoding | noncoding | noncoding |
| MSTRG. 184624. 1  | HAPLN3       | XLOC_190598 | 223 coding   | noncoding | noncoding | noncoding |
| MSTRG. 184625. 1  | HAPLN3       | XLOC_190599 | 284 coding   | noncoding | noncoding | noncoding |
| MSTRG. 184666. 1  |              | XLOC_190621 | 262 coding   | noncoding | noncoding | noncoding |
| MSTRG. 184683. 1  | LINC00928    | XLOC_190627 | 254 coding   | noncoding | noncoding | noncoding |
| MSTRG. 184678. 1  |              | XLOC_190628 | 263 coding   | noncoding | noncoding | noncoding |
| MSTRG. 184685. 1  | TICRR        | XLOC_190629 | 221 coding   | noncoding | noncoding | noncoding |
| MSTRG. 184709. 1  | WDR93        | XLOC_190637 | 211 coding   | noncoding | noncoding | noncoding |
| XR_001751354. 1   | MESP1        | XLOC_190638 | 1823 coding  | coding    | coding    | coding    |
| MSTRG. 184703. 1  |              | XLOC_190641 | 486 coding   | noncoding | noncoding | noncoding |
| MSTRG. 184717. 1  |              | XLOC_190655 | 252 coding   | noncoding | noncoding | noncoding |
| MSTRG. 184755. 2  | ZNF710       | XLOC_190657 | 1990 coding  | noncoding | noncoding | noncoding |
| MSTRG. 184772. 1  | ZNF710       | XLOC_190660 | 555 coding   | noncoding | noncoding | noncoding |
| MSTRG. 184740. 1  |              | XLOC_190671 | 231 coding   | noncoding | noncoding | noncoding |

|                   |              |             |              |           |           |           |
|-------------------|--------------|-------------|--------------|-----------|-----------|-----------|
| MSTRG. 184785. 1  |              | XLOC_190677 | 261 coding   | noncoding | noncoding | noncoding |
| MSTRG. 184819. 1  | LINC01585    | XLOC_190680 | 243 coding   | noncoding | noncoding | noncoding |
| MSTRG. 184873. 1  | VPS33B       | XLOC_190704 | 251 coding   | noncoding | noncoding | noncoding |
| XR_001751656. 2   | LOC105370972 | XLOC_190709 | 11025 coding | noncoding | noncoding | noncoding |
| MSTRG. 184884. 1  | LOC107984778 | XLOC_190716 | 295 coding   | noncoding | noncoding | noncoding |
| MSTRG. 184878. 1  |              | XLOC_190732 | 235 coding   | noncoding | noncoding | noncoding |
| MSTRG. 185043. 5  | SLCO3A1      | XLOC_190735 | 389 coding   | noncoding | noncoding | noncoding |
| MSTRG. 184913. 1  | ST8SIA2      | XLOC_190742 | 230 coding   | noncoding | noncoding | noncoding |
| MSTRG. 184915. 1  | ST8SIA2      | XLOC_190743 | 255 coding   | noncoding | noncoding | noncoding |
| MSTRG. 184938. 1  |              | XLOC_190755 | 276 coding   | noncoding | noncoding | noncoding |
| MSTRG. 184941. 1  |              | XLOC_190756 | 271 coding   | noncoding | noncoding | noncoding |
| MSTRG. 185132. 17 | CHD2         | XLOC_190763 | 6274 coding  | coding    | noncoding | coding    |
| MSTRG. 185132. 27 | CHD2         | XLOC_190763 | 3867 coding  | coding    | noncoding | noncoding |
| MSTRG. 184967. 1  | LOC101927025 | XLOC_190766 | 229 coding   | noncoding | noncoding | noncoding |
| MSTRG. 184970. 1  | LOC101927025 | XLOC_190767 | 247 coding   | noncoding | noncoding | noncoding |
| MSTRG. 184973. 1  | LOC105370981 | XLOC_190768 | 253 coding   | noncoding | noncoding | noncoding |
| MSTRG. 184997. 1  | LOC105370982 | XLOC_190776 | 307 coding   | noncoding | noncoding | noncoding |
| MSTRG. 184985. 1  |              | XLOC_190785 | 280 coding   | noncoding | noncoding | noncoding |
| MSTRG. 185005. 1  |              | XLOC_190787 | 324 coding   | noncoding | noncoding | noncoding |
| MSTRG. 185014. 1  |              | XLOC_190798 | 256 coding   | noncoding | coding    | noncoding |
| MSTRG. 185030. 1  |              | XLOC_190800 | 279 coding   | noncoding | noncoding | noncoding |
| MSTRG. 185121. 1  |              | XLOC_190806 | 239 coding   | noncoding | noncoding | noncoding |
| MSTRG. 185148. 1  |              | XLOC_190814 | 251 coding   | noncoding | noncoding | noncoding |
| MSTRG. 185162. 1  | LINC00924    | XLOC_190827 | 244 coding   | noncoding | noncoding | noncoding |
| MSTRG. 185212. 1  | LOC112268156 | XLOC_190846 | 235 coding   | noncoding | noncoding | noncoding |
| MSTRG. 185214. 1  | LOC112268156 | XLOC_190848 | 317 coding   | noncoding | noncoding | noncoding |
| MSTRG. 185215. 1  | LOC112268156 | XLOC_190849 | 264 coding   | noncoding | noncoding | noncoding |
| MSTRG. 185190. 1  | LOC101927263 | XLOC_190855 | 307 coding   | noncoding | noncoding | noncoding |
| MSTRG. 185271. 1  | LINC00923    | XLOC_190888 | 281 coding   | noncoding | noncoding | noncoding |
| MSTRG. 185276. 1  | LINC02251    | XLOC_190895 | 282 coding   | noncoding | noncoding | noncoding |
| MSTRG. 185278. 1  | LOC105371010 | XLOC_190898 | 262 coding   | noncoding | noncoding | noncoding |
| MSTRG. 185299. 1  | FAM169B      | XLOC_190906 | 278 coding   | noncoding | noncoding | noncoding |
| MSTRG. 185301. 1  | FAM169B      | XLOC_190907 | 295 coding   | noncoding | noncoding | noncoding |
| MSTRG. 185520. 9  | IRAIN        | XLOC_190913 | 5319 coding  | coding    | coding    | coding    |
| MSTRG. 185520. 10 | IRAIN        | XLOC_190913 | 11398 coding | coding    | coding    | coding    |
| MSTRG. 185432. 1  | TTC23        | XLOC_190937 | 212 coding   | noncoding | noncoding | noncoding |
| MSTRG. 185436. 1  | TTC23        | XLOC_190938 | 302 coding   | noncoding | noncoding | noncoding |
| NR_003260. 1      | DNM1P46      | XLOC_190953 | 3831 coding  | coding    | coding    | coding    |
| XM_017021978. 1   | ADAMTS17     | XLOC_190965 | 8814 coding  | coding    | coding    | coding    |
| XM_017021984. 1   | ADAMTS17     | XLOC_190965 | 11543 coding | coding    | coding    | coding    |
| MSTRG. 185601. 1  | ADAMTS17     | XLOC_190967 | 277 coding   | noncoding | noncoding | noncoding |
| MSTRG. 185673. 1  | CERS3-AS1    | XLOC_190976 | 249 coding   | noncoding | noncoding | noncoding |
| MSTRG. 185681. 1  | CERS3        | XLOC_190980 | 250 coding   | noncoding | noncoding | noncoding |

|                 |              |             |              |           |           |           |
|-----------------|--------------|-------------|--------------|-----------|-----------|-----------|
| NR_148019.1     | LINS1        | XLOC_190986 | 3751 coding  | coding    | noncoding | coding    |
| NR_148018.1     | LINS1        | XLOC_190986 | 2456 coding  | coding    | noncoding | coding    |
| MSTRG.185710.1  |              | XLOC_191050 | 246 coding   | noncoding | noncoding | noncoding |
| MSTRG.185713.1  |              | XLOC_191051 | 266 coding   | noncoding | noncoding | noncoding |
| MSTRG.185785.1  | TARSL2       | XLOC_191066 | 241 coding   | noncoding | noncoding | noncoding |
| MSTRG.185736.1  |              | XLOC_191075 | 272 coding   | noncoding | noncoding | noncoding |
| MSTRG.185816.6  | HBA1         | XLOC_191103 | 1056 coding  | coding    | coding    | coding    |
| MSTRG.185816.8  | HBA1         | XLOC_191103 | 1082 coding  | coding    | coding    | coding    |
| MSTRG.185816.10 | HBA1         | XLOC_191103 | 878 coding   | coding    | coding    | coding    |
| MSTRG.185811.1  | LUC7L        | XLOC_191106 | 3968 coding  | coding    | coding    | noncoding |
| MSTRG.185895.1  | LOC105371036 | XLOC_191117 | 207 coding   | noncoding | noncoding | noncoding |
| XM_017022960.2  | PRR35        | XLOC_191125 | 2952 coding  | coding    | coding    | coding    |
| XR_243327.2     | LOC101929280 | XLOC_191131 | 2219 coding  | noncoding | coding    | noncoding |
| NR_138610.1     | MCRIP2       | XLOC_191136 | 813 coding   | coding    | noncoding | noncoding |
| NR_147953.1     | RHOT2        | XLOC_191140 | 2587 coding  | coding    | coding    | coding    |
| MSTRG.185961.1  |              | XLOC_191153 | 281 coding   | noncoding | noncoding | noncoding |
| MSTRG.185992.1  |              | XLOC_191179 | 376 coding   | noncoding | coding    | noncoding |
| MSTRG.185998.1  | C1QTNF8      | XLOC_191181 | 318 coding   | noncoding | noncoding | noncoding |
| NM_021098.3     | CACNA1H      | XLOC_191183 | 8219 coding  | coding    | noncoding | coding    |
| MSTRG.186001.1  |              | XLOC_191188 | 311 coding   | noncoding | noncoding | noncoding |
| XM_005255541.4  | UBE2I        | XLOC_191192 | 1125 coding  | coding    | coding    | coding    |
| MSTRG.186040.1  | CLCN7        | XLOC_191207 | 418 coding   | coding    | noncoding | noncoding |
| NM_020825.3     | CRAMP1       | XLOC_191223 | 7673 coding  | noncoding | coding    | coding    |
| MSTRG.186088.1  | JPT2         | XLOC_191227 | 415 coding   | noncoding | noncoding | noncoding |
| MSTRG.186120.2  | EME2         | XLOC_191237 | 2941 coding  | coding    | coding    | coding    |
| NM_001370404.1  | TSC2         | XLOC_191264 | 6283 coding  | coding    | coding    | coding    |
| MSTRG.186175.1  | TSC2         | XLOC_191266 | 275 coding   | noncoding | noncoding | noncoding |
| MSTRG.186215.1  | ABCA3        | XLOC_191294 | 230 coding   | noncoding | noncoding | noncoding |
| MSTRG.186217.1  | ABCA3        | XLOC_191296 | 298 coding   | noncoding | noncoding | noncoding |
| MSTRG.186233.1  |              | XLOC_191324 | 422 coding   | noncoding | noncoding | noncoding |
| XR_932815.2     | SRRM2        | XLOC_191325 | 11511 coding | coding    | coding    | coding    |
| XR_002957796.1  | SRRM2        | XLOC_191325 | 11941 coding | coding    | coding    | coding    |
| MSTRG.186237.1  | PRSS41       | XLOC_191328 | 246 coding   | noncoding | noncoding | noncoding |
| MSTRG.186276.1  | FLYWCH1      | XLOC_191333 | 295 coding   | noncoding | noncoding | noncoding |
| MSTRG.186270.1  |              | XLOC_191337 | 252 coding   | noncoding | noncoding | noncoding |
| NR_110947.1     | LOC101929613 | XLOC_191339 | 440 coding   | noncoding | noncoding | noncoding |
| XM_017023643.2  | ZNF75A       | XLOC_191381 | 1550 coding  | coding    | coding    | coding    |
| MSTRG.186354.1  |              | XLOC_191390 | 281 coding   | coding    | noncoding | noncoding |
| MSTRG.186388.1  |              | XLOC_191398 | 243 coding   | noncoding | noncoding | noncoding |
| MSTRG.186400.12 | NLRC3        | XLOC_191399 | 314 coding   | noncoding | coding    | noncoding |
| MSTRG.186443.1  | ADCY9        | XLOC_191409 | 228 coding   | noncoding | noncoding | noncoding |
| MSTRG.186447.1  | ADCY9        | XLOC_191413 | 222 coding   | noncoding | noncoding | noncoding |
| MSTRG.186453.1  | ADCY9        | XLOC_191419 | 413 coding   | noncoding | noncoding | noncoding |

|                |              |             |              |           |           |           |
|----------------|--------------|-------------|--------------|-----------|-----------|-----------|
| MSTRG.186435.1 | SRL          | XLOC_191424 | 321 coding   | noncoding | coding    | noncoding |
| MSTRG.186441.1 |              | XLOC_191429 | 277 coding   | noncoding | noncoding | noncoding |
| MSTRG.186496.1 | C16orf96     | XLOC_191441 | 324 coding   | noncoding | noncoding | noncoding |
| MSTRG.186497.1 | C16orf96     | XLOC_191442 | 280 coding   | noncoding | noncoding | noncoding |
| MSTRG.186535.1 | SEC14L5      | XLOC_191467 | 297 coding   | noncoding | noncoding | noncoding |
| MSTRG.186552.1 | LOC105371067 | XLOC_191474 | 248 coding   | noncoding | noncoding | noncoding |
| MSTRG.186619.1 | RBFOX1       | XLOC_191486 | 389 coding   | noncoding | noncoding | noncoding |
| MSTRG.186624.1 | RBFOX1       | XLOC_191488 | 304 coding   | noncoding | noncoding | noncoding |
| MSTRG.186630.1 | RBFOX1       | XLOC_191491 | 317 coding   | noncoding | noncoding | noncoding |
| MSTRG.186649.1 | RBFOX1       | XLOC_191502 | 232 coding   | noncoding | noncoding | noncoding |
| MSTRG.186676.1 | RBFOX1       | XLOC_191515 | 314 coding   | noncoding | noncoding | noncoding |
| MSTRG.186569.1 |              | XLOC_191531 | 295 coding   | noncoding | noncoding | noncoding |
| MSTRG.186575.1 | LOC105371070 | XLOC_191532 | 216 coding   | noncoding | noncoding | noncoding |
| XR_001751981.2 | METTL22      | XLOC_191544 | 7532 coding  | coding    | coding    | coding    |
| NM_001127448.2 | ABAT         | XLOC_191548 | 4906 coding  | coding    | coding    | coding    |
| MSTRG.186709.1 |              | XLOC_191562 | 360 coding   | noncoding | noncoding | noncoding |
| MSTRG.186705.1 |              | XLOC_191563 | 269 coding   | noncoding | noncoding | noncoding |
| MSTRG.186707.1 |              | XLOC_191564 | 550 coding   | noncoding | noncoding | noncoding |
| MSTRG.186732.1 |              | XLOC_191574 | 253 coding   | noncoding | noncoding | noncoding |
| MSTRG.186734.1 |              | XLOC_191575 | 314 coding   | noncoding | noncoding | noncoding |
| MSTRG.186737.1 |              | XLOC_191581 | 244 coding   | noncoding | noncoding | noncoding |
| MSTRG.186790.1 | LOC101927026 | XLOC_191588 | 260 coding   | noncoding | noncoding | noncoding |
| MSTRG.186801.1 | LOC101927026 | XLOC_191591 | 263 coding   | noncoding | noncoding | noncoding |
| XR_933063.3    | LOC105371077 | XLOC_191594 | 4797 coding  | noncoding | noncoding | noncoding |
| MSTRG.186820.1 | GRIN2A       | XLOC_191598 | 287 coding   | noncoding | noncoding | noncoding |
| MSTRG.186824.1 | GRIN2A       | XLOC_191600 | 271 coding   | noncoding | noncoding | noncoding |
| MSTRG.186773.1 |              | XLOC_191603 | 347 coding   | coding    | noncoding | noncoding |
| MSTRG.186775.1 |              | XLOC_191604 | 332 coding   | noncoding | noncoding | noncoding |
| MSTRG.186839.1 |              | XLOC_191606 | 264 coding   | noncoding | noncoding | noncoding |
| MSTRG.186846.1 | ATF7IP2      | XLOC_191612 | 252 coding   | noncoding | noncoding | noncoding |
| MSTRG.186849.1 | ATF7IP2      | XLOC_191614 | 233 coding   | noncoding | noncoding | noncoding |
| NM_001286403.2 | CHITA        | XLOC_191621 | 14309 coding | coding    | coding    | coding    |
| MSTRG.186855.1 |              | XLOC_191639 | 228 coding   | noncoding | noncoding | noncoding |
| MSTRG.186934.1 | LOC105371082 | XLOC_191647 | 273 coding   | noncoding | noncoding | noncoding |
| MSTRG.186944.1 | LOC400499    | XLOC_191652 | 446 coding   | noncoding | noncoding | noncoding |
| MSTRG.186857.1 |              | XLOC_191664 | 1163 coding  | noncoding | noncoding | coding    |
| MSTRG.186859.1 |              | XLOC_191665 | 609 coding   | noncoding | noncoding | noncoding |
| MSTRG.186889.2 | LITAF        | XLOC_191669 | 5428 coding  | coding    | coding    | noncoding |
| MSTRG.186903.8 | TXNDC11      | XLOC_191674 | 1019 coding  | coding    | noncoding | coding    |
| MSTRG.186904.1 |              | XLOC_191677 | 230 coding   | noncoding | noncoding | noncoding |
| MSTRG.186960.3 | RSL1D1       | XLOC_191678 | 1095 coding  | coding    | coding    | noncoding |
| MSTRG.187102.1 | NPIPB2       | XLOC_191683 | 469 coding   | noncoding | noncoding | noncoding |
| MSTRG.187105.1 | NPIPB2       | XLOC_191685 | 250 coding   | noncoding | noncoding | noncoding |

|                  |               |             |              |           |           |           |
|------------------|---------------|-------------|--------------|-----------|-----------|-----------|
| MSTRG. 187112. 1 | SNX29         | XLOC_191690 | 236 coding   | noncoding | noncoding | noncoding |
| XR_933083. 3     | LOC105371087  | XLOC_191700 | 2636 coding  | noncoding | noncoding | noncoding |
| MSTRG. 187125. 1 | SNX29         | XLOC_191701 | 218 coding   | noncoding | noncoding | noncoding |
| MSTRG. 187132. 1 | SNX29         | XLOC_191708 | 265 coding   | noncoding | noncoding | noncoding |
| MSTRG. 186968. 1 |               | XLOC_191710 | 253 coding   | noncoding | noncoding | noncoding |
| MSTRG. 186974. 1 |               | XLOC_191720 | 259 coding   | noncoding | noncoding | noncoding |
| MSTRG. 186979. 1 |               | XLOC_191723 | 269 coding   | noncoding | noncoding | noncoding |
| MSTRG. 186997. 1 | SHISA9        | XLOC_191726 | 222 coding   | noncoding | noncoding | noncoding |
| MSTRG. 186999. 1 | SHISA9        | XLOC_191727 | 317 coding   | noncoding | noncoding | noncoding |
| MSTRG. 187003. 1 | SHISA9        | XLOC_191729 | 223 coding   | noncoding | noncoding | noncoding |
| MSTRG. 187012. 1 | LOC105371091  | XLOC_191733 | 268 coding   | noncoding | noncoding | noncoding |
| MSTRG. 187016. 1 | SHISA9        | XLOC_191735 | 300 coding   | noncoding | noncoding | noncoding |
| MSTRG. 187020. 1 | SHISA9        | XLOC_191738 | 236 coding   | noncoding | noncoding | noncoding |
| MSTRG. 186985. 1 |               | XLOC_191746 | 278 coding   | noncoding | noncoding | noncoding |
| MSTRG. 186990. 1 |               | XLOC_191749 | 318 coding   | noncoding | noncoding | noncoding |
| MSTRG. 187080. 1 |               | XLOC_191764 | 236 coding   | noncoding | noncoding | noncoding |
| MSTRG. 187091. 1 | MIR193BHG     | XLOC_191771 | 279 coding   | noncoding | noncoding | noncoding |
| MSTRG. 187084. 1 |               | XLOC_191774 | 452 coding   | noncoding | noncoding | noncoding |
| MSTRG. 187085. 1 |               | XLOC_191775 | 244 coding   | noncoding | noncoding | noncoding |
| NM_016561. 3     | BFAR          | XLOC_191781 | 2903 coding  | coding    | coding    | coding    |
| NR_146231. 1     | PKDIP3-NPIPA1 | XLOC_191788 | 7365 coding  | coding    | coding    | coding    |
| MSTRG. 187194. 1 | PDXDC1        | XLOC_191795 | 346 coding   | coding    | coding    | noncoding |
| MSTRG. 187225. 1 | ABCC1         | XLOC_191810 | 252 coding   | noncoding | noncoding | noncoding |
| MSTRG. 187245. 1 |               | XLOC_191825 | 226 coding   | noncoding | noncoding | noncoding |
| MSTRG. 187248. 1 |               | XLOC_191828 | 235 coding   | noncoding | noncoding | noncoding |
| MSTRG. 187270. 1 |               | XLOC_191852 | 302 coding   | noncoding | noncoding | noncoding |
| MSTRG. 187278. 1 |               | XLOC_191858 | 231 coding   | noncoding | noncoding | noncoding |
| MSTRG. 187282. 1 |               | XLOC_191867 | 367 coding   | noncoding | noncoding | noncoding |
| MSTRG. 187284. 1 |               | XLOC_191868 | 206 coding   | noncoding | noncoding | noncoding |
| MSTRG. 187384. 2 | SMG1          | XLOC_191871 | 12109 coding | coding    | coding    | coding    |
| MSTRG. 187336. 1 | TMC7          | XLOC_191874 | 318 coding   | noncoding | noncoding | noncoding |
| MSTRG. 187340. 1 | TMC7          | XLOC_191878 | 278 coding   | noncoding | noncoding | noncoding |
| MSTRG. 187359. 1 |               | XLOC_191883 | 246 coding   | noncoding | noncoding | noncoding |
| XM_011545866. 3  | SYT17         | XLOC_191884 | 3655 coding  | coding    | coding    | coding    |
| MSTRG. 187370. 1 | LOC105371114  | XLOC_191886 | 207 coding   | noncoding | noncoding | noncoding |
| MSTRG. 187377. 1 | LOC105371114  | XLOC_191890 | 444 coding   | noncoding | noncoding | noncoding |
| MSTRG. 187397. 1 | TMC5          | XLOC_191892 | 316 coding   | noncoding | noncoding | noncoding |
| MSTRG. 187446. 1 | IQCK          | XLOC_191908 | 220 coding   | noncoding | noncoding | noncoding |
| MSTRG. 187448. 1 | IQCK          | XLOC_191910 | 288 coding   | noncoding | noncoding | noncoding |
| MSTRG. 187452. 1 | IQCK          | XLOC_191911 | 265 coding   | noncoding | noncoding | noncoding |
| MSTRG. 187453. 1 | IQCK          | XLOC_191912 | 254 coding   | noncoding | noncoding | noncoding |
| MSTRG. 187454. 1 | IQCK          | XLOC_191913 | 320 coding   | noncoding | noncoding | noncoding |
| MSTRG. 187408. 1 |               | XLOC_191915 | 572 coding   | noncoding | noncoding | noncoding |

|                  |              |             |             |           |           |           |
|------------------|--------------|-------------|-------------|-----------|-----------|-----------|
| MSTRG. 187417. 1 |              | XLOC_191920 | 602 coding  | noncoding | noncoding | noncoding |
| MSTRG. 187419. 1 |              | XLOC_191921 | 268 coding  | noncoding | noncoding | noncoding |
| MSTRG. 187430. 1 | PDILT        | XLOC_191927 | 268 coding  | noncoding | noncoding | noncoding |
| MSTRG. 187486. 1 | LOC105371120 | XLOC_191938 | 306 coding  | noncoding | noncoding | noncoding |
| MSTRG. 187489. 1 | ACSM1        | XLOC_191940 | 383 coding  | noncoding | noncoding | noncoding |
| MSTRG. 187466. 1 | DNAH3        | XLOC_191974 | 253 coding  | noncoding | noncoding | noncoding |
| XM_024450293. 1  | METTL9       | XLOC_191994 | 2944 coding | coding    | coding    | coding    |
| MSTRG. 187600. 3 | IGSF6        | XLOC_191995 | 3216 coding | coding    | noncoding | noncoding |
| MSTRG. 187621. 1 |              | XLOC_192025 | 350 coding  | noncoding | noncoding | noncoding |
| MSTRG. 187640. 1 | SCNN1B       | XLOC_192035 | 265 coding  | noncoding | noncoding | noncoding |
| MSTRG. 187626. 1 | SCNN1B       | XLOC_192038 | 272 coding  | noncoding | noncoding | noncoding |
| XR_001752007. 2  | DCTN5        | XLOC_192046 | 7885 coding | coding    | coding    | noncoding |
| MSTRG. 187692. 1 | ERN2         | XLOC_192049 | 265 coding  | noncoding | coding    | noncoding |
| MSTRG. 187662. 1 |              | XLOC_192051 | 378 coding  | noncoding | noncoding | noncoding |
| MSTRG. 187714. 3 | PRKCB        | XLOC_192055 | 201 coding  | noncoding | noncoding | noncoding |
| MSTRG. 187695. 1 |              | XLOC_192074 | 271 coding  | noncoding | noncoding | noncoding |
| MSTRG. 187699. 1 |              | XLOC_192075 | 284 coding  | noncoding | noncoding | noncoding |
| MSTRG. 187738. 1 | TNRC6A       | XLOC_192088 | 209 coding  | noncoding | noncoding | noncoding |
| MSTRG. 187815. 1 | HS3ST4       | XLOC_192126 | 250 coding  | noncoding | noncoding | noncoding |
| MSTRG. 187824. 1 |              | XLOC_192137 | 303 coding  | noncoding | noncoding | noncoding |
| MSTRG. 187835. 1 |              | XLOC_192141 | 383 coding  | noncoding | noncoding | noncoding |
| MSTRG. 187843. 1 |              | XLOC_192146 | 255 coding  | noncoding | noncoding | noncoding |
| MSTRG. 187848. 1 |              | XLOC_192150 | 267 coding  | noncoding | noncoding | noncoding |
| MSTRG. 187849. 1 |              | XLOC_192151 | 376 coding  | noncoding | noncoding | noncoding |
| MSTRG. 187867. 2 | NSMCE1       | XLOC_192158 | 549 coding  | coding    | noncoding | noncoding |
| MSTRG. 187880. 1 | IL4R         | XLOC_192162 | 285 coding  | noncoding | noncoding | noncoding |
| MSTRG. 187882. 1 | IL4R         | XLOC_192164 | 294 coding  | noncoding | noncoding | noncoding |
| MSTRG. 187859. 1 | IL21R        | XLOC_192173 | 397 coding  | noncoding | noncoding | noncoding |
| MSTRG. 187860. 1 | IL21R-AS1    | XLOC_192174 | 217 coding  | noncoding | noncoding | noncoding |
| MSTRG. 187982. 1 | KIAA0556     | XLOC_192181 | 239 coding  | noncoding | noncoding | noncoding |
| MSTRG. 187985. 1 | KIAA0556     | XLOC_192184 | 233 coding  | noncoding | noncoding | noncoding |
| MSTRG. 187909. 1 | GSG1L        | XLOC_192195 | 291 coding  | noncoding | noncoding | noncoding |
| MSTRG. 187920. 1 | SBK1         | XLOC_192208 | 245 coding  | noncoding | noncoding | noncoding |
| MSTRG. 187922. 1 | SBK1         | XLOC_192209 | 330 coding  | noncoding | noncoding | noncoding |
| MSTRG. 188042. 2 | EIF3CL       | XLOC_192214 | 1448 coding | coding    | coding    | coding    |
| MSTRG. 188054. 1 |              | XLOC_192220 | 292 coding  | noncoding | noncoding | noncoding |
| MSTRG. 188057. 1 |              | XLOC_192221 | 213 coding  | noncoding | noncoding | noncoding |
| MSTRG. 188059. 1 | SGF29        | XLOC_192223 | 209 coding  | noncoding | noncoding | noncoding |
| MSTRG. 188078. 1 | NPIP9        | XLOC_192231 | 294 coding  | noncoding | noncoding | noncoding |
| XM_005255069. 1  | ATXN2L       | XLOC_192236 | 4433 coding | coding    | coding    | coding    |
| NM_001308293. 1  | SH2B1        | XLOC_192240 | 3192 coding | coding    | coding    | coding    |
| MSTRG. 188017. 1 | RABEP2       | XLOC_192244 | 232 coding  | noncoding | noncoding | noncoding |
| MSTRG. 188018. 1 | RABEP2       | XLOC_192245 | 654 coding  | coding    | noncoding | noncoding |

|                |              |             |              |           |           |           |
|----------------|--------------|-------------|--------------|-----------|-----------|-----------|
| MSTRG.188027.1 | NFATC2IP     | XLOC_192251 | 294 coding   | noncoding | noncoding | noncoding |
| MSTRG.188029.1 | LAT          | XLOC_192255 | 212 coding   | noncoding | noncoding | noncoding |
| MSTRG.188030.1 |              | XLOC_192256 | 273 coding   | noncoding | noncoding | noncoding |
| MSTRG.188036.1 |              | XLOC_192258 | 236 coding   | noncoding | noncoding | noncoding |
| MSTRG.188248.1 |              | XLOC_192282 | 238 coding   | noncoding | noncoding | noncoding |
| MSTRG.188087.1 |              | XLOC_192293 | 278 coding   | noncoding | noncoding | noncoding |
| MSTRG.188095.2 | C16orf54     | XLOC_192297 | 2191 coding  | coding    | coding    | noncoding |
| MSTRG.188092.1 | ZG16         | XLOC_192300 | 332 coding   | noncoding | noncoding | noncoding |
| NM_001256270.1 | KIF22        | XLOC_192304 | 2257 coding  | coding    | coding    | coding    |
| MSTRG.188120.1 | MVP          | XLOC_192309 | 273 coding   | noncoding | noncoding | noncoding |
| XR_001752362.1 | LOC107984836 | XLOC_192314 | 2005 coding  | noncoding | coding    | noncoding |
| MSTRG.188107.1 |              | XLOC_192316 | 236 coding   | noncoding | noncoding | noncoding |
| MSTRG.188131.1 | TMEM219      | XLOC_192318 | 206 coding   | noncoding | noncoding | noncoding |
| MSTRG.188141.1 | INO80E       | XLOC_192322 | 442 coding   | noncoding | noncoding | noncoding |
| MSTRG.188155.1 |              | XLOC_192335 | 237 coding   | noncoding | noncoding | noncoding |
| NM_001114380.2 | ITGAL        | XLOC_192356 | 4877 coding  | coding    | coding    | coding    |
| MSTRG.188296.8 | ITGAL        | XLOC_192356 | 358 coding   | noncoding | noncoding | noncoding |
| MSTRG.188291.1 |              | XLOC_192363 | 312 coding   | noncoding | noncoding | noncoding |
| MSTRG.188301.1 | ZNF785       | XLOC_192368 | 261 coding   | noncoding | noncoding | noncoding |
| MSTRG.188303.1 | ZNF785       | XLOC_192370 | 599 coding   | noncoding | noncoding | noncoding |
| MSTRG.188312.1 |              | XLOC_192377 | 318 coding   | noncoding | noncoding | noncoding |
| NM_006662.3    | SRCAP        | XLOC_192379 | 11724 coding | coding    | noncoding | coding    |
| MSTRG.188365.1 | RNF40        | XLOC_192386 | 704 coding   | noncoding | noncoding | noncoding |
| MSTRG.188329.1 | BCL7C        | XLOC_192389 | 222 coding   | noncoding | noncoding | noncoding |
| XM_005255712.4 | ZNF646       | XLOC_192415 | 6705 coding  | coding    | coding    | coding    |
| MSTRG.188408.1 | KAT8         | XLOC_192421 | 265 coding   | noncoding | noncoding | noncoding |
| MSTRG.188378.1 |              | XLOC_192424 | 214 coding   | noncoding | noncoding | noncoding |
| MSTRG.188383.1 |              | XLOC_192432 | 437 coding   | noncoding | noncoding | noncoding |
| MSTRG.188468.1 |              | XLOC_192435 | 236 coding   | noncoding | noncoding | noncoding |
| MSTRG.188470.1 |              | XLOC_192436 | 267 coding   | noncoding | noncoding | noncoding |
| NM_000887.5    | ITGAX        | XLOC_192445 | 4663 coding  | coding    | coding    | coding    |
| MSTRG.188480.6 | ITGAX        | XLOC_192445 | 208 coding   | noncoding | noncoding | noncoding |
| MSTRG.188421.1 | ZNF843       | XLOC_192450 | 215 coding   | noncoding | noncoding | noncoding |
| NM_001318221.2 | AHSP         | XLOC_192458 | 484 coding   | coding    | coding    | coding    |
| MSTRG.188459.1 |              | XLOC_192465 | 254 coding   | noncoding | noncoding | noncoding |
| MSTRG.188465.1 |              | XLOC_192466 | 246 coding   | coding    | noncoding | noncoding |
| MSTRG.188590.1 | ZNF720       | XLOC_192475 | 261 coding   | noncoding | noncoding | noncoding |
| MSTRG.188502.1 | LOC102725101 | XLOC_192494 | 249 coding   | noncoding | noncoding | noncoding |
| XM_017023634.2 | TP53TG3D     | XLOC_192495 | 3428 coding  | noncoding | coding    | coding    |
| MSTRG.188517.1 | LOC102725101 | XLOC_192500 | 297 coding   | noncoding | noncoding | noncoding |
| MSTRG.188521.1 | LOC102725101 | XLOC_192501 | 239 coding   | noncoding | noncoding | noncoding |
| MSTRG.188491.1 |              | XLOC_192508 | 270 coding   | noncoding | noncoding | noncoding |
| MSTRG.188559.1 |              | XLOC_192533 | 243 coding   | noncoding | noncoding | noncoding |

|                 |              |             |              |           |           |           |
|-----------------|--------------|-------------|--------------|-----------|-----------|-----------|
| MSTRG.188574.1  |              | XLOC_192545 | 301 coding   | noncoding | noncoding | noncoding |
| MSTRG.188578.1  |              | XLOC_192550 | 220 coding   | noncoding | noncoding | noncoding |
| MSTRG.188613.1  |              | XLOC_192553 | 241 coding   | noncoding | noncoding | noncoding |
| MSTRG.188684.1  |              | XLOC_192590 | 224 coding   | noncoding | noncoding | noncoding |
| MSTRG.188701.1  |              | XLOC_192599 | 307 coding   | noncoding | noncoding | noncoding |
| MSTRG.188903.1  | PHKB         | XLOC_192627 | 273 coding   | noncoding | noncoding | noncoding |
| MSTRG.188734.1  |              | XLOC_192641 | 298 coding   | noncoding | noncoding | noncoding |
| MSTRG.188747.1  |              | XLOC_192648 | 313 coding   | noncoding | noncoding | noncoding |
| MSTRG.188755.1  | ABCC12       | XLOC_192649 | 278 coding   | noncoding | noncoding | noncoding |
| MSTRG.188790.1  | SIAH1        | XLOC_192654 | 228 coding   | noncoding | noncoding | noncoding |
| MSTRG.188757.1  |              | XLOC_192656 | 233 coding   | noncoding | noncoding | noncoding |
| MSTRG.188759.14 | N4BP1        | XLOC_192657 | 1153 coding  | noncoding | coding    | noncoding |
| MSTRG.188812.1  |              | XLOC_192661 | 211 coding   | coding    | noncoding | noncoding |
| MSTRG.188799.1  |              | XLOC_192662 | 295 coding   | coding    | noncoding | noncoding |
| MSTRG.188809.1  | LOC105371241 | XLOC_192671 | 315 coding   | noncoding | noncoding | noncoding |
| MSTRG.188810.1  |              | XLOC_192673 | 273 coding   | noncoding | noncoding | noncoding |
| XR_001752139.2  | LOC102724859 | XLOC_192674 | 22318 coding | noncoding | coding    | coding    |
| MSTRG.188844.1  |              | XLOC_192691 | 351 coding   | noncoding | noncoding | noncoding |
| XM_017022895.1  | ADCY7        | XLOC_192709 | 6258 coding  | coding    | coding    | coding    |
| NM_015247.2     | CYLD         | XLOC_192734 | 8713 coding  | coding    | coding    | coding    |
| MSTRG.189024.1  |              | XLOC_192786 | 204 coding   | noncoding | noncoding | noncoding |
| MSTRG.189041.1  |              | XLOC_192793 | 273 coding   | noncoding | noncoding | noncoding |
| MSTRG.189043.1  |              | XLOC_192794 | 295 coding   | noncoding | noncoding | noncoding |
| XM_005256176.3  | CHD9         | XLOC_192796 | 10162 coding | coding    | coding    | coding    |
| MSTRG.189274.1  | CHD9         | XLOC_192797 | 324 coding   | noncoding | noncoding | noncoding |
| MSTRG.189279.1  | CHD9         | XLOC_192802 | 231 coding   | noncoding | noncoding | noncoding |
| XM_011523253.2  | RBL2         | XLOC_192831 | 4057 coding  | coding    | coding    | coding    |
| MSTRG.189075.1  |              | XLOC_192868 | 228 coding   | noncoding | noncoding | noncoding |
| MSTRG.189083.1  |              | XLOC_192873 | 246 coding   | noncoding | noncoding | noncoding |
| MSTRG.189107.1  |              | XLOC_192886 | 265 coding   | noncoding | noncoding | noncoding |
| MSTRG.189118.1  |              | XLOC_192891 | 397 coding   | noncoding | noncoding | noncoding |
| MSTRG.189116.1  |              | XLOC_192892 | 274 coding   | noncoding | noncoding | noncoding |
| MSTRG.189138.1  |              | XLOC_192903 | 249 coding   | noncoding | noncoding | noncoding |
| MSTRG.189149.1  |              | XLOC_192910 | 450 coding   | noncoding | noncoding | noncoding |
| NM_004530.6     | MMP2         | XLOC_192911 | 3514 coding  | coding    | coding    | coding    |
| MSTRG.189230.1  | GNAO1        | XLOC_192951 | 770 coding   | noncoding | noncoding | noncoding |
| MSTRG.189241.1  |              | XLOC_192961 | 287 coding   | noncoding | noncoding | noncoding |
| MSTRG.189245.1  |              | XLOC_192962 | 244 coding   | noncoding | noncoding | noncoding |
| MSTRG.189325.1  | SLC12A3      | XLOC_192994 | 258 coding   | noncoding | noncoding | noncoding |
| NM_000078.3     | CETP         | XLOC_193000 | 1691 coding  | coding    | coding    | coding    |
| XM_011523373.2  | NLRC5        | XLOC_193004 | 6928 coding  | coding    | coding    | coding    |
| MSTRG.189432.24 | NLRC5        | XLOC_193004 | 477 coding   | noncoding | noncoding | noncoding |
| MSTRG.189423.1  | PLLP         | XLOC_193029 | 262 coding   | noncoding | noncoding | noncoding |

|                   |              |             |             |           |           |           |
|-------------------|--------------|-------------|-------------|-----------|-----------|-----------|
| MSTRG. 189415. 1  |              | XLOC_193032 | 255 coding  | noncoding | noncoding | noncoding |
| NM_002990. 5      | CCL22        | XLOC_193033 | 2917 coding | coding    | coding    | coding    |
| XM_011522950. 2   | ADGRG5       | XLOC_193046 | 4376 coding | coding    | coding    | coding    |
| XR_001752213. 1   | LOC107984889 | XLOC_193048 | 3542 coding | noncoding | noncoding | noncoding |
| MSTRG. 189497. 1  | KIFC3        | XLOC_193057 | 238 coding  | noncoding | noncoding | noncoding |
| MSTRG. 189503. 1  | KIFC3        | XLOC_193060 | 252 coding  | noncoding | noncoding | noncoding |
| MSTRG. 189514. 1  | CNGB1        | XLOC_193065 | 325 coding  | noncoding | noncoding | noncoding |
| MSTRG. 189516. 1  | CNGB1        | XLOC_193067 | 208 coding  | noncoding | noncoding | noncoding |
| MSTRG. 189605. 22 | CNOT1        | XLOC_193087 | 3624 coding | coding    | coding    | coding    |
| MSTRG. 189581. 1  |              | XLOC_193100 | 226 coding  | noncoding | noncoding | noncoding |
| MSTRG. 189588. 1  |              | XLOC_193105 | 280 coding  | noncoding | noncoding | noncoding |
| MSTRG. 189598. 1  |              | XLOC_193132 | 406 coding  | noncoding | noncoding | noncoding |
| MSTRG. 189653. 1  |              | XLOC_193143 | 232 coding  | coding    | noncoding | noncoding |
| MSTRG. 189671. 1  |              | XLOC_193147 | 245 coding  | noncoding | noncoding | noncoding |
| MSTRG. 189667. 1  |              | XLOC_193153 | 307 coding  | noncoding | noncoding | noncoding |
| MSTRG. 189684. 1  |              | XLOC_193159 | 288 coding  | noncoding | noncoding | noncoding |
| MSTRG. 189693. 1  |              | XLOC_193164 | 258 coding  | noncoding | noncoding | noncoding |
| MSTRG. 189701. 1  |              | XLOC_193170 | 238 coding  | noncoding | noncoding | noncoding |
| MSTRG. 189741. 1  | CDH8         | XLOC_193176 | 296 coding  | noncoding | noncoding | noncoding |
| MSTRG. 189719. 1  |              | XLOC_193186 | 269 coding  | noncoding | noncoding | noncoding |
| MSTRG. 189753. 1  |              | XLOC_193191 | 201 coding  | noncoding | noncoding | noncoding |
| MSTRG. 189804. 1  | LOC105371308 | XLOC_193202 | 315 coding  | coding    | noncoding | noncoding |
| MSTRG. 189781. 1  |              | XLOC_193220 | 298 coding  | noncoding | noncoding | noncoding |
| MSTRG. 189833. 1  |              | XLOC_193234 | 318 coding  | noncoding | noncoding | noncoding |
| MSTRG. 189904. 1  | LINC00922    | XLOC_193261 | 286 coding  | noncoding | noncoding | noncoding |
| MSTRG. 189889. 1  |              | XLOC_193266 | 296 coding  | noncoding | noncoding | noncoding |
| MSTRG. 189916. 1  |              | XLOC_193271 | 293 coding  | noncoding | noncoding | noncoding |
| XM_011522892. 2   | BEAN1        | XLOC_193373 | 3474 coding | noncoding | coding    | coding    |
| NM_001363918. 1   | CMTM3        | XLOC_193402 | 2333 coding | coding    | coding    | coding    |
| MSTRG. 189961. 1  |              | XLOC_193414 | 264 coding  | noncoding | noncoding | noncoding |
| MSTRG. 190121. 1  | TERB1        | XLOC_193420 | 282 coding  | coding    | noncoding | noncoding |
| MSTRG. 190063. 1  | CA7          | XLOC_193426 | 282 coding  | noncoding | noncoding | noncoding |
| NM_001185176. 1   | CES3         | XLOC_193433 | 3179 coding | coding    | coding    | coding    |
| MSTRG. 190128. 1  |              | XLOC_193435 | 211 coding  | noncoding | noncoding | noncoding |
| NM_001040667. 3   | HSF4         | XLOC_193452 | 2224 coding | coding    | coding    | coding    |
| MSTRG. 190164. 3  | ELMO3        | XLOC_193458 | 701 coding  | coding    | coding    | noncoding |
| MSTRG. 190170. 1  | LRRC29       | XLOC_193460 | 1247 coding | noncoding | noncoding | noncoding |
| MSTRG. 190198. 1  | ZDHHC1       | XLOC_193480 | 246 coding  | noncoding | noncoding | noncoding |
| XM_005255775. 4   | CTCF         | XLOC_193489 | 3816 coding | coding    | coding    | coding    |
| MSTRG. 190227. 1  | CTCF         | XLOC_193491 | 231 coding  | noncoding | noncoding | noncoding |
| MSTRG. 190272. 11 | RANBP10      | XLOC_193499 | 1511 coding | coding    | coding    | coding    |
| NM_001322040. 2   | NUTF2        | XLOC_193505 | 2332 coding | coding    | coding    | coding    |
| MSTRG. 190258. 1  | LCAT         | XLOC_193514 | 308 coding  | coding    | noncoding | noncoding |

|                 |              |             |             |           |           |           |
|-----------------|--------------|-------------|-------------|-----------|-----------|-----------|
| MSTRG.190295.1  | DPEP2        | XLOC_193528 | 1143 coding | noncoding | noncoding | noncoding |
| MSTRG.190295.17 | DPEP2        | XLOC_193528 | 1230 coding | coding    | coding    | noncoding |
| MSTRG.190309.1  | NFATC3       | XLOC_193535 | 2122 coding | coding    | noncoding | coding    |
| MSTRG.190361.1  | PRMT7        | XLOC_193553 | 239 coding  | noncoding | noncoding | noncoding |
| MSTRG.190343.1  |              | XLOC_193560 | 211 coding  | noncoding | noncoding | noncoding |
| MSTRG.190335.1  | CDH3         | XLOC_193562 | 309 coding  | noncoding | noncoding | noncoding |
| MSTRG.190337.1  | CDH3         | XLOC_193563 | 306 coding  | noncoding | noncoding | noncoding |
| NM_001317185.2  | CDH1         | XLOC_193564 | 4878 coding | coding    | coding    | coding    |
| MSTRG.190346.1  | CDH1         | XLOC_193565 | 330 coding  | noncoding | noncoding | noncoding |
| MSTRG.190347.1  | CDH1         | XLOC_193566 | 256 coding  | noncoding | noncoding | noncoding |
| MSTRG.190348.1  | CDH1         | XLOC_193567 | 241 coding  | noncoding | noncoding | noncoding |
| MSTRG.190357.1  | TANGO6       | XLOC_193570 | 362 coding  | noncoding | noncoding | noncoding |
| MSTRG.190378.6  | HAS3         | XLOC_193573 | 5848 coding | coding    | coding    | coding    |
| MSTRG.190375.1  | SNTB2        | XLOC_193579 | 262 coding  | noncoding | noncoding | noncoding |
| MSTRG.190377.1  | SNTB2        | XLOC_193581 | 267 coding  | noncoding | noncoding | noncoding |
| MSTRG.190392.1  | CYB5B        | XLOC_193587 | 204 coding  | noncoding | noncoding | noncoding |
| MSTRG.190428.1  | NFAT5        | XLOC_193600 | 361 coding  | noncoding | noncoding | noncoding |
| MSTRG.190439.1  | NFAT5        | XLOC_193611 | 539 coding  | noncoding | noncoding | noncoding |
| XM_017022880.1  | WWP2         | XLOC_193618 | 4626 coding | coding    | coding    | coding    |
| XM_011522826.3  | WWP2         | XLOC_193618 | 4392 coding | coding    | coding    | coding    |
| MSTRG.190474.1  | WWP2         | XLOC_193622 | 303 coding  | noncoding | noncoding | noncoding |
| MSTRG.190480.1  | WWP2         | XLOC_193627 | 291 coding  | noncoding | noncoding | noncoding |
| MSTRG.190567.1  | LOC100506083 | XLOC_193648 | 348 coding  | noncoding | noncoding | noncoding |
| MSTRG.190572.5  | ST3GAL2      | XLOC_193650 | 3560 coding | coding    | coding    | coding    |
| MSTRG.190498.1  | SF3B3        | XLOC_193656 | 319 coding  | noncoding | noncoding | noncoding |
| MSTRG.190488.1  | SF3B3        | XLOC_193661 | 244 coding  | noncoding | noncoding | noncoding |
| MSTRG.190491.1  | IL34         | XLOC_193664 | 265 coding  | noncoding | noncoding | noncoding |
| MSTRG.190506.1  | MTSS2        | XLOC_193666 | 341 coding  | noncoding | noncoding | noncoding |
| MSTRG.190591.1  | ZNF821       | XLOC_193702 | 224 coding  | noncoding | noncoding | noncoding |
| MSTRG.190609.1  |              | XLOC_193704 | 253 coding  | noncoding | noncoding | noncoding |
| MSTRG.190694.1  | C16orf47     | XLOC_193851 | 247 coding  | noncoding | noncoding | noncoding |
| MSTRG.190649.1  |              | XLOC_193855 | 223 coding  | noncoding | noncoding | noncoding |
| MSTRG.190651.1  |              | XLOC_193856 | 267 coding  | noncoding | noncoding | noncoding |
| MSTRG.190652.1  |              | XLOC_193857 | 239 coding  | noncoding | noncoding | noncoding |
| MSTRG.190657.1  |              | XLOC_193861 | 293 coding  | noncoding | noncoding | noncoding |
| MSTRG.190720.3  | LOC283922    | XLOC_193872 | 3434 coding | coding    | coding    | coding    |
| MSTRG.190701.1  | NPIPB15      | XLOC_193879 | 205 coding  | noncoding | noncoding | noncoding |
| MSTRG.190706.1  | CLEC18B      | XLOC_193881 | 692 coding  | noncoding | noncoding | noncoding |
| MSTRG.190708.1  | LOC107984827 | XLOC_193883 | 414 coding  | noncoding | noncoding | noncoding |
| MSTRG.190748.1  |              | XLOC_193892 | 237 coding  | noncoding | noncoding | noncoding |
| MSTRG.190955.1  | ZNRF1        | XLOC_193903 | 281 coding  | noncoding | noncoding | noncoding |
| MSTRG.190924.1  | LDHD         | XLOC_193906 | 249 coding  | coding    | noncoding | noncoding |
| MSTRG.190933.1  |              | XLOC_193914 | 389 coding  | noncoding | noncoding | noncoding |

|                |              |             |              |           |           |           |
|----------------|--------------|-------------|--------------|-----------|-----------|-----------|
| NR_136216.1    | CNTNAP4      | XLOC_193943 | 6669 coding  | coding    | coding    | coding    |
| MSTRG.191050.1 |              | XLOC_193956 | 641 coding   | noncoding | noncoding | noncoding |
| MSTRG.191108.1 | VATIL        | XLOC_193978 | 447 coding   | noncoding | noncoding | noncoding |
| MSTRG.192329.1 | WVOX         | XLOC_194009 | 201 coding   | noncoding | noncoding | noncoding |
| MSTRG.192450.1 | WVOX         | XLOC_194032 | 305 coding   | noncoding | noncoding | noncoding |
| MSTRG.192481.1 | WVOX         | XLOC_194037 | 256 coding   | noncoding | noncoding | noncoding |
| MSTRG.192515.1 | MAF          | XLOC_194043 | 218 coding   | noncoding | noncoding | noncoding |
| MSTRG.191135.1 | MAFTRR       | XLOC_194087 | 283 coding   | noncoding | noncoding | noncoding |
| MSTRG.191140.1 | MAFTRR       | XLOC_194090 | 214 coding   | noncoding | noncoding | noncoding |
| MSTRG.191199.1 | GCSH         | XLOC_194151 | 262 coding   | noncoding | noncoding | noncoding |
| MSTRG.191241.1 | BCO1         | XLOC_194153 | 240 coding   | noncoding | noncoding | noncoding |
| MSTRG.191254.1 |              | XLOC_194166 | 249 coding   | noncoding | noncoding | noncoding |
| MSTRG.191255.1 |              | XLOC_194167 | 354 coding   | noncoding | noncoding | noncoding |
| MSTRG.191377.1 |              | XLOC_194204 | 264 coding   | noncoding | noncoding | noncoding |
| XR_001751898.2 | HSD17B2      | XLOC_194232 | 1480 coding  | coding    | coding    | coding    |
| MSTRG.191331.1 |              | XLOC_194259 | 308 coding   | noncoding | noncoding | noncoding |
| MSTRG.191425.1 | CDH13        | XLOC_194265 | 554 coding   | noncoding | noncoding | noncoding |
| MSTRG.191432.1 | CDH13        | XLOC_194269 | 258 coding   | noncoding | noncoding | noncoding |
| MSTRG.191445.1 | CDH13        | XLOC_194275 | 502 coding   | noncoding | noncoding | noncoding |
| MSTRG.191457.1 | CDH13        | XLOC_194280 | 258 coding   | noncoding | noncoding | noncoding |
| XM_017023317.2 | NECAB2       | XLOC_194297 | 2152 coding  | coding    | coding    | coding    |
| MSTRG.191519.1 |              | XLOC_194309 | 364 coding   | noncoding | noncoding | noncoding |
| MSTRG.191552.1 |              | XLOC_194324 | 264 coding   | noncoding | noncoding | noncoding |
| MSTRG.191580.1 | KLHL36       | XLOC_194342 | 241 coding   | noncoding | noncoding | noncoding |
| NR_073578.1    | USP10        | XLOC_194343 | 3116 coding  | coding    | coding    | coding    |
| MSTRG.191598.1 | CRISPLD2     | XLOC_194352 | 230 coding   | noncoding | noncoding | noncoding |
| MSTRG.191603.1 | ZDHHC7       | XLOC_194355 | 4976 coding  | coding    | coding    | noncoding |
| MSTRG.191624.1 | KIAA0513     | XLOC_194365 | 738 coding   | noncoding | noncoding | coding    |
| XM_005255863.4 | GSE1         | XLOC_194371 | 7363 coding  | coding    | coding    | coding    |
| XR_001752394.2 | LOC107984830 | XLOC_194375 | 4752 coding  | noncoding | coding    | noncoding |
| MSTRG.191676.1 |              | XLOC_194430 | 244 coding   | noncoding | noncoding | noncoding |
| MSTRG.191737.1 |              | XLOC_194451 | 266 coding   | noncoding | noncoding | noncoding |
| MSTRG.191753.1 | LOC105371393 | XLOC_194455 | 273 coding   | noncoding | noncoding | noncoding |
| MSTRG.191831.1 | JPH3         | XLOC_194499 | 280 coding   | noncoding | noncoding | noncoding |
| MSTRG.191844.1 | KLHDC4       | XLOC_194509 | 1885 coding  | coding    | coding    | coding    |
| MSTRG.191849.1 | LOC102724467 | XLOC_194511 | 691 coding   | noncoding | noncoding | coding    |
| XM_011523172.2 | BANP         | XLOC_194517 | 2663 coding  | coding    | coding    | coding    |
| MSTRG.191916.1 | BANP         | XLOC_194520 | 211 coding   | noncoding | noncoding | noncoding |
| XM_017023784.1 | ZNF469       | XLOC_194532 | 14433 coding | coding    | noncoding | coding    |
| NM_153813.3    | ZFPM1        | XLOC_194533 | 5432 coding  | coding    | coding    | coding    |
| XM_017022982.1 | ZFPM1        | XLOC_194533 | 3030 coding  | coding    | coding    | coding    |
| MSTRG.191966.1 | PIEZO1       | XLOC_194559 | 249 coding   | noncoding | noncoding | noncoding |
| MSTRG.191982.1 |              | XLOC_194600 | 855 coding   | noncoding | coding    | noncoding |

|                 |              |             |             |           |           |           |
|-----------------|--------------|-------------|-------------|-----------|-----------|-----------|
| XM_017023022.1  | ACSF3        | XLOC_194606 | 1769 coding | coding    | coding    | coding    |
| NM_004933.3     | CDH15        | XLOC_194613 | 2866 coding | coding    | coding    | coding    |
| MSTRG.192031.1  | SLC22A31     | XLOC_194615 | 280 coding  | noncoding | noncoding | noncoding |
| XM_017023016.1  | ZNF778       | XLOC_194616 | 7612 coding | coding    | coding    | coding    |
| MSTRG.192120.1  | ZNF778       | XLOC_194617 | 213 coding  | noncoding | noncoding | noncoding |
| MSTRG.192123.1  |              | XLOC_194619 | 297 coding  | noncoding | noncoding | noncoding |
| NM_001242885.2  | LOC100287036 | XLOC_194625 | 1443 coding | noncoding | coding    | noncoding |
| XM_017023009.1  | DPEP1        | XLOC_194643 | 2326 coding | coding    | coding    | coding    |
| XM_017023806.1  | CDK10        | XLOC_194649 | 1829 coding | coding    | coding    | coding    |
| MSTRG.192097.2  | VPS9D1-AS1   | XLOC_194654 | 1925 coding | noncoding | coding    | coding    |
| NR_110128.1     | ZNF276       | XLOC_194654 | 3481 coding | coding    | coding    | coding    |
| MSTRG.192088.1  | SPIRE2       | XLOC_194663 | 285 coding  | noncoding | noncoding | noncoding |
| MSTRG.192079.1  | TUBB3        | XLOC_194671 | 287 coding  | noncoding | noncoding | noncoding |
| XR_001752313.1  | LOC101927999 | XLOC_194684 | 2177 coding | coding    | coding    | coding    |
| MSTRG.185763.1  | POLR3K       | XLOC_194690 | 254 coding  | noncoding | noncoding | noncoding |
| MSTRG.185766.8  | RHBDF1       | XLOC_194692 | 245 coding  | coding    | coding    | noncoding |
| MSTRG.185807.2  | NPRL3        | XLOC_194693 | 2160 coding | coding    | coding    | coding    |
| MSTRG.185815.4  | HBA1         | XLOC_194697 | 1235 coding | coding    | coding    | noncoding |
| MSTRG.185815.19 | HBA1         | XLOC_194697 | 1154 coding | coding    | coding    | noncoding |
| MSTRG.185815.31 | HBA1         | XLOC_194697 | 1094 coding | coding    | coding    | noncoding |
| MSTRG.185813.1  | LUC7L        | XLOC_194700 | 252 coding  | noncoding | noncoding | noncoding |
| MSTRG.185925.1  | RAB40C       | XLOC_194730 | 279 coding  | noncoding | noncoding | noncoding |
| NR_136337.1     | LOC105371184 | XLOC_194746 | 716 coding  | noncoding | noncoding | noncoding |
| XR_001751838.1  | CCDC78       | XLOC_194756 | 2392 coding | coding    | coding    | coding    |
| MSTRG.185987.1  | SOX8         | XLOC_194772 | 449 coding  | coding    | noncoding | noncoding |
| MSTRG.186002.1  |              | XLOC_194782 | 225 coding  | noncoding | noncoding | noncoding |
| MSTRG.186044.1  | CLCN7        | XLOC_194795 | 234 coding  | noncoding | noncoding | noncoding |
| MSTRG.186063.11 | IFT140       | XLOC_194803 | 1022 coding | noncoding | noncoding | noncoding |
| MSTRG.186114.1  | MAPK8IP3     | XLOC_194820 | 2864 coding | coding    | coding    | coding    |
| MSTRG.186100.1  | MEIOB        | XLOC_194832 | 257 coding  | noncoding | noncoding | noncoding |
| MSTRG.186163.1  |              | XLOC_194858 | 309 coding  | noncoding | noncoding | noncoding |
| NM_001286625.1  | RNPS1        | XLOC_194863 | 2046 coding | coding    | coding    | coding    |
| NM_001089.3     | ABCA3        | XLOC_194864 | 6602 coding | coding    | coding    | coding    |
| MSTRG.186238.4  | PDPK1        | XLOC_194884 | 1045 coding | coding    | coding    | coding    |
| MSTRG.186324.3  | MMP25-AS1    | XLOC_194921 | 6271 coding | coding    | coding    | noncoding |
| MSTRG.186324.10 | MMP25-AS1    | XLOC_194921 | 1576 coding | noncoding | noncoding | coding    |
| MSTRG.186372.1  |              | XLOC_194945 | 698 coding  | noncoding | noncoding | noncoding |
| MSTRG.186377.4  | ZNF263       | XLOC_194948 | 2536 coding | coding    | coding    | noncoding |
| MSTRG.186385.1  |              | XLOC_194952 | 267 coding  | noncoding | noncoding | noncoding |
| NM_001353382.1  | C16orf90     | XLOC_194968 | 1333 coding | coding    | coding    | coding    |
| MSTRG.186404.1  | LOC101929732 | XLOC_194973 | 298 coding  | noncoding | noncoding | noncoding |
| XM_024450471.1  | SLX4         | XLOC_194975 | 9178 coding | coding    | coding    | coding    |
| MSTRG.186410.1  | SLX4         | XLOC_194976 | 215 coding  | noncoding | noncoding | noncoding |

|                  |              |             |              |           |           |           |
|------------------|--------------|-------------|--------------|-----------|-----------|-----------|
| MSTRG. 186424. 1 | TRAP1        | XLOC_194987 | 267 coding   | noncoding | noncoding | noncoding |
| NM_004380. 2     | CREBBP       | XLOC_194989 | 10197 coding | coding    | coding    | coding    |
| MSTRG. 186478. 1 | CREBBP       | XLOC_195005 | 220 coding   | noncoding | noncoding | noncoding |
| MSTRG. 186426. 1 |              | XLOC_195007 | 510 coding   | noncoding | noncoding | noncoding |
| MSTRG. 186427. 1 |              | XLOC_195008 | 200 coding   | noncoding | noncoding | noncoding |
| MSTRG. 186457. 1 | ADCY9        | XLOC_195014 | 243 coding   | noncoding | noncoding | noncoding |
| MSTRG. 186430. 1 |              | XLOC_195016 | 219 coding   | noncoding | noncoding | noncoding |
| NM_001323668. 1  | SRL          | XLOC_195018 | 5592 coding  | coding    | coding    | coding    |
| NM_021646. 4     | ZNF500       | XLOC_195037 | 5824 coding  | coding    | coding    | coding    |
| MSTRG. 186505. 1 | SEPTIN12     | XLOC_195040 | 236 coding   | noncoding | noncoding | noncoding |
| MSTRG. 186536. 1 | SEC14L5      | XLOC_195045 | 251 coding   | noncoding | noncoding | noncoding |
| MSTRG. 186532. 1 | NAGPA        | XLOC_195049 | 303 coding   | noncoding | noncoding | noncoding |
| MSTRG. 186542. 1 | NAGPA        | XLOC_195051 | 273 coding   | noncoding | noncoding | noncoding |
| MSTRG. 186546. 1 | C16orf89     | XLOC_195055 | 317 coding   | noncoding | noncoding | noncoding |
| MSTRG. 186602. 1 | RBFOX1       | XLOC_195060 | 272 coding   | noncoding | noncoding | noncoding |
| MSTRG. 186609. 1 | RBFOX1       | XLOC_195063 | 229 coding   | noncoding | noncoding | noncoding |
| MSTRG. 186625. 1 | RBFOX1       | XLOC_195070 | 368 coding   | noncoding | noncoding | noncoding |
| MSTRG. 186633. 1 | RBFOX1       | XLOC_195073 | 275 coding   | noncoding | noncoding | noncoding |
| MSTRG. 186642. 1 | RBFOX1       | XLOC_195077 | 302 coding   | noncoding | noncoding | noncoding |
| MSTRG. 186648. 1 | RBFOX1       | XLOC_195080 | 232 coding   | noncoding | noncoding | noncoding |
| MSTRG. 186652. 1 | RBFOX1       | XLOC_195082 | 200 coding   | noncoding | noncoding | noncoding |
| MSTRG. 186655. 1 | RBFOX1       | XLOC_195083 | 306 coding   | noncoding | noncoding | noncoding |
| MSTRG. 186660. 1 | RBFOX1       | XLOC_195086 | 211 coding   | noncoding | noncoding | noncoding |
| MSTRG. 186666. 1 | RBFOX1       | XLOC_195090 | 304 coding   | noncoding | noncoding | noncoding |
| XR_002957901. 1  | LOC105371068 | XLOC_195092 | 7986 coding  | noncoding | noncoding | noncoding |
| MSTRG. 186691. 1 | RBFOX1       | XLOC_195098 | 317 coding   | noncoding | noncoding | noncoding |
| MSTRG. 186558. 1 |              | XLOC_195103 | 289 coding   | noncoding | noncoding | noncoding |
| MSTRG. 186581. 1 |              | XLOC_195118 | 436 coding   | noncoding | noncoding | noncoding |
| MSTRG. 186587. 1 |              | XLOC_195120 | 271 coding   | noncoding | noncoding | noncoding |
| MSTRG. 186742. 1 | TMEM186      | XLOC_195127 | 241 coding   | noncoding | noncoding | noncoding |
| MSTRG. 186746. 2 | PMM2         | XLOC_195129 | 701 coding   | coding    | noncoding | noncoding |
| NM_001321858. 1  | USP7         | XLOC_195137 | 5207 coding  | coding    | coding    | coding    |
| MSTRG. 186764. 1 | USP7         | XLOC_195140 | 263 coding   | noncoding | noncoding | noncoding |
| MSTRG. 186766. 1 | USP7         | XLOC_195142 | 243 coding   | noncoding | noncoding | noncoding |
| MSTRG. 186706. 1 |              | XLOC_195145 | 477 coding   | noncoding | noncoding | noncoding |
| MSTRG. 186738. 1 |              | XLOC_195158 | 244 coding   | noncoding | noncoding | noncoding |
| MSTRG. 186791. 1 | LOC101927026 | XLOC_195165 | 260 coding   | noncoding | noncoding | noncoding |
| MSTRG. 186802. 1 | LOC101927026 | XLOC_195173 | 263 coding   | noncoding | noncoding | noncoding |
| NM_001134407. 3  | GRIN2A       | XLOC_195176 | 14706 coding | coding    | coding    | coding    |
| MSTRG. 186777. 1 |              | XLOC_195193 | 293 coding   | noncoding | noncoding | noncoding |
| MSTRG. 186826. 1 |              | XLOC_195199 | 315 coding   | noncoding | noncoding | noncoding |
| MSTRG. 186832. 1 | TEKT5        | XLOC_195204 | 613 coding   | coding    | noncoding | noncoding |
| MSTRG. 186838. 1 | TVP23A       | XLOC_195207 | 262 coding   | noncoding | noncoding | noncoding |

|                  |              |             |              |           |           |           |
|------------------|--------------|-------------|--------------|-----------|-----------|-----------|
| MSTRG. 186856. 1 |              | XLOC_195216 | 201 coding   | noncoding | noncoding | noncoding |
| MSTRG. 186931. 1 | LOC105371082 | XLOC_195230 | 244 coding   | noncoding | noncoding | noncoding |
| MSTRG. 186933. 1 | LOC105371082 | XLOC_195232 | 273 coding   | noncoding | coding    | noncoding |
| MSTRG. 186893. 1 | LITAF        | XLOC_195245 | 429 coding   | noncoding | noncoding | noncoding |
| MSTRG. 186896. 1 | LITAF        | XLOC_195248 | 279 coding   | noncoding | noncoding | noncoding |
| MSTRG. 186866. 1 |              | XLOC_195252 | 239 coding   | noncoding | noncoding | noncoding |
| MSTRG. 186907. 1 | ZC3H7A       | XLOC_195255 | 289 coding   | noncoding | noncoding | noncoding |
| MSTRG. 187044. 1 | CPPED1       | XLOC_195284 | 698 coding   | noncoding | noncoding | noncoding |
| MSTRG. 186973. 1 |              | XLOC_195303 | 256 coding   | noncoding | noncoding | noncoding |
| MSTRG. 186975. 1 |              | XLOC_195304 | 261 coding   | noncoding | noncoding | noncoding |
| MSTRG. 186976. 1 |              | XLOC_195305 | 252 coding   | noncoding | noncoding | noncoding |
| MSTRG. 187019. 1 | SHISA9       | XLOC_195317 | 337 coding   | noncoding | noncoding | noncoding |
| MSTRG. 187070. 1 |              | XLOC_195331 | 250 coding   | noncoding | noncoding | noncoding |
| MSTRG. 187067. 1 |              | XLOC_195340 | 242 coding   | noncoding | noncoding | noncoding |
| MSTRG. 187069. 1 |              | XLOC_195341 | 305 coding   | noncoding | noncoding | noncoding |
| MSTRG. 187081. 1 |              | XLOC_195355 | 251 coding   | noncoding | noncoding | noncoding |
| MSTRG. 187083. 1 | LINC02130    | XLOC_195356 | 294 coding   | noncoding | noncoding | noncoding |
| XR_001751906. 2  | PARN         | XLOC_195358 | 1682 coding  | coding    | coding    | coding    |
| XR_933120. 2     | LOC105376749 | XLOC_195368 | 334 coding   | coding    | noncoding | noncoding |
| MSTRG. 187171. 2 | NOMO1        | XLOC_195370 | 2126 coding  | noncoding | coding    | coding    |
| MSTRG. 187184. 2 | PDXDC1       | XLOC_195374 | 417 coding   | noncoding | noncoding | noncoding |
| MSTRG. 187182. 1 | MPV17L       | XLOC_195384 | 289 coding   | noncoding | noncoding | noncoding |
| XM_017023904. 2  | MARF1        | XLOC_195387 | 5567 coding  | coding    | coding    | coding    |
| XM_017023903. 2  | MARF1        | XLOC_195387 | 5570 coding  | coding    | coding    | coding    |
| MSTRG. 187239. 1 | PKDIP1       | XLOC_195398 | 337 coding   | noncoding | noncoding | noncoding |
| MSTRG. 187251. 1 |              | XLOC_195411 | 217 coding   | noncoding | noncoding | noncoding |
| MSTRG. 187256. 1 |              | XLOC_195415 | 215 coding   | noncoding | noncoding | noncoding |
| MSTRG. 187258. 1 |              | XLOC_195416 | 303 coding   | noncoding | noncoding | noncoding |
| MSTRG. 187269. 1 |              | XLOC_195423 | 294 coding   | noncoding | noncoding | noncoding |
| MSTRG. 187280. 1 | ABCC6P1      | XLOC_195439 | 312 coding   | noncoding | noncoding | noncoding |
| MSTRG. 187283. 1 |              | XLOC_195441 | 280 coding   | noncoding | noncoding | noncoding |
| MSTRG. 187307. 1 |              | XLOC_195444 | 233 coding   | noncoding | noncoding | noncoding |
| MSTRG. 187332. 1 |              | XLOC_195461 | 244 coding   | noncoding | noncoding | noncoding |
| MSTRG. 187352. 1 |              | XLOC_195474 | 252 coding   | noncoding | noncoding | noncoding |
| MSTRG. 187373. 1 | LOC105371114 | XLOC_195488 | 252 coding   | noncoding | noncoding | noncoding |
| MSTRG. 187378. 1 | LOC105371114 | XLOC_195489 | 227 coding   | noncoding | noncoding | noncoding |
| MSTRG. 187396. 1 | TMC5         | XLOC_195490 | 298 coding   | noncoding | noncoding | noncoding |
| MSTRG. 187436. 2 | VPS35L       | XLOC_195496 | 2569 coding  | noncoding | coding    | noncoding |
| MSTRG. 187451. 1 | IQCK         | XLOC_195501 | 265 coding   | noncoding | noncoding | noncoding |
| MSTRG. 187484. 1 | ACSM2B       | XLOC_195524 | 204 coding   | noncoding | noncoding | noncoding |
| MSTRG. 187548. 3 | LYRM1        | XLOC_195553 | 649 coding   | coding    | noncoding | noncoding |
| XM_011545882. 2  | DNAH3        | XLOC_195556 | 12972 coding | coding    | noncoding | coding    |
| MSTRG. 187465. 1 | DNAH3        | XLOC_195561 | 217 coding   | noncoding | noncoding | noncoding |

|                   |              |             |              |           |           |           |
|-------------------|--------------|-------------|--------------|-----------|-----------|-----------|
| MSTRG. 187470. 1  | DNAH3        | XLOC_195564 | 240 coding   | noncoding | noncoding | noncoding |
| MSTRG. 187641. 1  | SCNN1B       | XLOC_195619 | 247 coding   | noncoding | noncoding | noncoding |
| MSTRG. 187658. 1  | COG7         | XLOC_195623 | 252 coding   | noncoding | noncoding | noncoding |
| MSTRG. 187674. 1  | EARS2        | XLOC_195628 | 386 coding   | noncoding | noncoding | noncoding |
| MSTRG. 187676. 1  | EARS2        | XLOC_195630 | 293 coding   | noncoding | noncoding | noncoding |
| MSTRG. 187689. 1  | PLK1         | XLOC_195638 | 214 coding   | noncoding | noncoding | noncoding |
| MSTRG. 187661. 1  |              | XLOC_195641 | 378 coding   | noncoding | noncoding | noncoding |
| MSTRG. 187665. 1  |              | XLOC_195643 | 266 coding   | noncoding | noncoding | noncoding |
| MSTRG. 187713. 12 | PRKCB        | XLOC_195645 | 8649 coding  | coding    | coding    | noncoding |
| MSTRG. 187715. 1  | PRKCB        | XLOC_195646 | 1840 coding  | noncoding | noncoding | noncoding |
| MSTRG. 187697. 1  | LOC105371143 | XLOC_195652 | 228 coding   | noncoding | noncoding | noncoding |
| MSTRG. 187770. 1  |              | XLOC_195669 | 243 coding   | noncoding | noncoding | noncoding |
| MSTRG. 187775. 2  | LCMT1        | XLOC_195671 | 968 coding   | coding    | noncoding | noncoding |
| MSTRG. 187804. 1  |              | XLOC_195690 | 309 coding   | noncoding | noncoding | noncoding |
| MSTRG. 187852. 1  |              | XLOC_195712 | 224 coding   | noncoding | noncoding | noncoding |
| MSTRG. 187873. 1  | NSMCE1-DT    | XLOC_195722 | 218 coding   | noncoding | noncoding | noncoding |
| MSTRG. 187908. 1  | GSG1L        | XLOC_195748 | 291 coding   | noncoding | noncoding | noncoding |
| MSTRG. 187891. 1  |              | XLOC_195753 | 511 coding   | noncoding | noncoding | noncoding |
| NM_001270940. 2   | XPO6         | XLOC_195757 | 4673 coding  | coding    | coding    | coding    |
| MSTRG. 187936. 10 | XPO6         | XLOC_195757 | 575 coding   | coding    | coding    | coding    |
| MSTRG. 187921. 1  | SBK1         | XLOC_195792 | 245 coding   | noncoding | noncoding | noncoding |
| MSTRG. 187924. 1  | SBK1         | XLOC_195794 | 2954 coding  | noncoding | coding    | coding    |
| NM_001317856. 1   | EIF3CL       | XLOC_195798 | 3140 coding  | coding    | coding    | coding    |
| MSTRG. 188048. 1  | CLN3         | XLOC_195803 | 238 coding   | noncoding | noncoding | noncoding |
| MSTRG. 188013. 1  | ATP2A1       | XLOC_195827 | 345 coding   | coding    | noncoding | noncoding |
| MSTRG. 188031. 1  |              | XLOC_195835 | 273 coding   | noncoding | noncoding | noncoding |
| MSTRG. 188032. 1  |              | XLOC_195836 | 249 coding   | noncoding | noncoding | noncoding |
| MSTRG. 188206. 8  | RRN3P2       | XLOC_195839 | 1098 coding  | coding    | noncoding | noncoding |
| MSTRG. 188246. 1  |              | XLOC_195857 | 681 coding   | noncoding | noncoding | noncoding |
| MSTRG. 188247. 1  |              | XLOC_195858 | 1181 coding  | noncoding | noncoding | noncoding |
| MSTRG. 188279. 1  | SMG1P2       | XLOC_195880 | 285 coding   | noncoding | noncoding | noncoding |
| MSTRG. 188082. 1  |              | XLOC_195881 | 209 coding   | noncoding | noncoding | noncoding |
| MSTRG. 188086. 5  | SPN          | XLOC_195882 | 1173 coding  | noncoding | noncoding | noncoding |
| MSTRG. 188091. 1  | ZG16         | XLOC_195887 | 302 coding   | noncoding | noncoding | noncoding |
| MSTRG. 188093. 1  | ZG16         | XLOC_195888 | 325 coding   | noncoding | noncoding | noncoding |
| MSTRG. 188102. 1  | SEZ6L2       | XLOC_195895 | 241 coding   | noncoding | noncoding | noncoding |
| NM_001040056. 3   | MAPK3        | XLOC_195913 | 1085 coding  | coding    | coding    | coding    |
| MSTRG. 188318. 4  | LOC730183    | XLOC_195959 | 12628 coding | coding    | coding    | coding    |
| MSTRG. 188328. 1  | BCL7C        | XLOC_195966 | 222 coding   | noncoding | noncoding | noncoding |
| MSTRG. 188326. 1  |              | XLOC_195971 | 205 coding   | noncoding | noncoding | noncoding |
| MSTRG. 188343. 1  | FBXL19       | XLOC_195973 | 680 coding   | coding    | coding    | noncoding |
| MSTRG. 188345. 1  | FBXL19       | XLOC_195975 | 248 coding   | noncoding | noncoding | noncoding |
| MSTRG. 188394. 7  | ZNF646       | XLOC_195988 | 1958 coding  | coding    | coding    | noncoding |

|                 |              |             |             |           |           |           |
|-----------------|--------------|-------------|-------------|-----------|-----------|-----------|
| MSTRG.188381.1  | PRSS36       | XLOC_195994 | 264 coding  | noncoding | noncoding | noncoding |
| MSTRG.188376.1  |              | XLOC_195997 | 291 coding  | noncoding | noncoding | noncoding |
| MSTRG.188377.1  |              | XLOC_195998 | 265 coding  | noncoding | noncoding | noncoding |
| MSTRG.188385.1  |              | XLOC_196004 | 214 coding  | noncoding | noncoding | noncoding |
| MSTRG.188471.5  | ITGAM        | XLOC_196009 | 4632 coding | coding    | coding    | coding    |
| MSTRG.188466.11 | ITGAX        | XLOC_196010 | 709 coding  | noncoding | noncoding | noncoding |
| MSTRG.188419.1  | ZNF843       | XLOC_196014 | 273 coding  | noncoding | noncoding | noncoding |
| MSTRG.188445.1  |              | XLOC_196027 | 319 coding  | noncoding | noncoding | noncoding |
| MSTRG.188436.1  |              | XLOC_196030 | 241 coding  | noncoding | noncoding | noncoding |
| MSTRG.188460.1  |              | XLOC_196036 | 254 coding  | noncoding | noncoding | noncoding |
| MSTRG.188458.1  |              | XLOC_196037 | 205 coding  | noncoding | noncoding | noncoding |
| MSTRG.188585.11 | ZNF267       | XLOC_196043 | 3380 coding | coding    | coding    | noncoding |
| MSTRG.188510.1  | LOC102725101 | XLOC_196056 | 223 coding  | noncoding | noncoding | noncoding |
| MSTRG.188519.1  | LOC102725101 | XLOC_196062 | 331 coding  | noncoding | noncoding | noncoding |
| MSTRG.188520.1  | LOC102725101 | XLOC_196063 | 239 coding  | noncoding | noncoding | noncoding |
| MSTRG.188490.1  |              | XLOC_196070 | 270 coding  | noncoding | noncoding | noncoding |
| MSTRG.188525.1  |              | XLOC_196074 | 320 coding  | noncoding | noncoding | noncoding |
| MSTRG.188608.1  | LINC01566    | XLOC_196110 | 296 coding  | noncoding | noncoding | noncoding |
| MSTRG.188577.1  |              | XLOC_196111 | 220 coding  | noncoding | noncoding | noncoding |
| MSTRG.188614.1  |              | XLOC_196115 | 241 coding  | noncoding | noncoding | noncoding |
| MSTRG.188615.1  |              | XLOC_196120 | 476 coding  | noncoding | noncoding | noncoding |
| MSTRG.188669.1  | SHCBP1       | XLOC_196140 | 248 coding  | noncoding | noncoding | noncoding |
| NM_182493.3     | MYLK3        | XLOC_196147 | 8033 coding | coding    | coding    | coding    |
| MSTRG.188658.1  |              | XLOC_196150 | 788 coding  | noncoding | noncoding | noncoding |
| MSTRG.188683.1  |              | XLOC_196154 | 298 coding  | noncoding | noncoding | noncoding |
| MSTRG.188682.1  |              | XLOC_196155 | 617 coding  | noncoding | noncoding | noncoding |
| MSTRG.188689.1  |              | XLOC_196158 | 307 coding  | noncoding | noncoding | noncoding |
| MSTRG.188696.1  |              | XLOC_196159 | 248 coding  | noncoding | noncoding | noncoding |
| MSTRG.188727.1  | NETO2        | XLOC_196173 | 387 coding  | noncoding | noncoding | noncoding |
| MSTRG.188895.17 | PHKB         | XLOC_196179 | 1332 coding | coding    | noncoding | noncoding |
| MSTRG.188785.1  | ABCC11       | XLOC_196201 | 342 coding  | noncoding | noncoding | noncoding |
| MSTRG.188756.1  |              | XLOC_196203 | 279 coding  | noncoding | noncoding | noncoding |
| MSTRG.188804.1  |              | XLOC_196245 | 261 coding  | noncoding | noncoding | noncoding |
| MSTRG.188808.1  | LOC105371241 | XLOC_196250 | 271 coding  | noncoding | noncoding | noncoding |
| XR_933534.2     | LOC105371244 | XLOC_196257 | 4673 coding | noncoding | coding    | noncoding |
| XM_006721171.4  | ZNF423       | XLOC_196259 | 9233 coding | coding    | coding    | coding    |
| MSTRG.188850.1  | ZNF423       | XLOC_196261 | 309 coding  | noncoding | noncoding | noncoding |
| MSTRG.188842.1  |              | XLOC_196266 | 250 coding  | noncoding | noncoding | noncoding |
| MSTRG.188868.1  |              | XLOC_196272 | 313 coding  | noncoding | noncoding | noncoding |
| MSTRG.188970.1  | BRD7         | XLOC_196275 | 9014 coding | coding    | coding    | coding    |
| MSTRG.188970.3  | ADCY7        | XLOC_196275 | 586 coding  | noncoding | coding    | noncoding |
| MSTRG.188970.6  | BRD7         | XLOC_196275 | 9944 coding | coding    | coding    | coding    |
| MSTRG.188923.1  |              | XLOC_196280 | 446 coding  | noncoding | noncoding | noncoding |

|                 |              |             |             |           |           |           |
|-----------------|--------------|-------------|-------------|-----------|-----------|-----------|
| MSTRG.189047.7  | NOD2         | XLOC_196294 | 3245 coding | coding    | noncoding | noncoding |
| MSTRG.188988.1  |              | XLOC_196315 | 297 coding  | noncoding | noncoding | noncoding |
| MSTRG.188991.1  |              | XLOC_196321 | 257 coding  | noncoding | noncoding | noncoding |
| MSTRG.188995.1  | C16orf97     | XLOC_196325 | 245 coding  | noncoding | noncoding | noncoding |
| MSTRG.189023.1  |              | XLOC_196339 | 409 coding  | noncoding | noncoding | noncoding |
| MSTRG.189035.1  |              | XLOC_196346 | 262 coding  | noncoding | noncoding | noncoding |
| MSTRG.189080.1  |              | XLOC_196384 | 209 coding  | noncoding | noncoding | noncoding |
| MSTRG.189090.1  |              | XLOC_196387 | 267 coding  | noncoding | noncoding | noncoding |
| MSTRG.189106.1  |              | XLOC_196395 | 265 coding  | noncoding | noncoding | noncoding |
| MSTRG.189115.1  |              | XLOC_196399 | 258 coding  | noncoding | noncoding | noncoding |
| MSTRG.189117.1  |              | XLOC_196400 | 304 coding  | noncoding | noncoding | noncoding |
| MSTRG.189177.1  | CES1P2       | XLOC_196427 | 257 coding  | noncoding | noncoding | noncoding |
| MSTRG.189189.1  | CES1         | XLOC_196430 | 315 coding  | noncoding | noncoding | noncoding |
| MSTRG.189244.1  |              | XLOC_196476 | 244 coding  | noncoding | noncoding | noncoding |
| MSTRG.189271.1  | LOC105371286 | XLOC_196490 | 240 coding  | noncoding | noncoding | noncoding |
| MSTRG.189328.1  | SLC12A3      | XLOC_196501 | 266 coding  | noncoding | noncoding | noncoding |
| MSTRG.189431.16 | NLRC5        | XLOC_196509 | 3661 coding | coding    | coding    | coding    |
| MSTRG.189409.1  |              | XLOC_196517 | 263 coding  | noncoding | noncoding | noncoding |
| MSTRG.189410.1  |              | XLOC_196518 | 226 coding  | noncoding | noncoding | noncoding |
| MSTRG.189416.1  |              | XLOC_196522 | 207 coding  | noncoding | noncoding | noncoding |
| MSTRG.189468.1  | CCDC102A     | XLOC_196527 | 313 coding  | noncoding | noncoding | noncoding |
| XM_024450266.1  | KIFC3        | XLOC_196543 | 3829 coding | coding    | coding    | coding    |
| MSTRG.189498.1  | KIFC3        | XLOC_196544 | 238 coding  | noncoding | noncoding | noncoding |
| MSTRG.189505.1  | KIFC3        | XLOC_196547 | 306 coding  | noncoding | noncoding | noncoding |
| XM_005256069.4  | ZNF319       | XLOC_196555 | 4143 coding | coding    | coding    | coding    |
| MSTRG.189548.1  | CCDC113      | XLOC_196564 | 221 coding  | noncoding | noncoding | noncoding |
| MSTRG.189550.1  | CCDC113      | XLOC_196566 | 248 coding  | noncoding | noncoding | noncoding |
| MSTRG.189607.6  | CNOT1        | XLOC_196577 | 2107 coding | coding    | coding    | coding    |
| MSTRG.189553.1  |              | XLOC_196587 | 242 coding  | noncoding | noncoding | noncoding |
| MSTRG.189594.1  |              | XLOC_196610 | 269 coding  | noncoding | noncoding | noncoding |
| NM_001282301.2  | NPAP1L       | XLOC_196628 | 2115 coding | coding    | coding    | coding    |
| MSTRG.189683.1  |              | XLOC_196637 | 281 coding  | noncoding | noncoding | noncoding |
| MSTRG.189685.1  |              | XLOC_196638 | 288 coding  | noncoding | noncoding | noncoding |
| MSTRG.189721.1  |              | XLOC_196666 | 285 coding  | noncoding | noncoding | noncoding |
| MSTRG.189726.1  |              | XLOC_196671 | 204 coding  | noncoding | noncoding | noncoding |
| MSTRG.189759.1  |              | XLOC_196678 | 304 coding  | noncoding | noncoding | noncoding |
| MSTRG.189777.1  |              | XLOC_196708 | 209 coding  | noncoding | noncoding | noncoding |
| MSTRG.189786.1  |              | XLOC_196711 | 292 coding  | noncoding | noncoding | noncoding |
| MSTRG.189788.1  |              | XLOC_196713 | 247 coding  | noncoding | noncoding | noncoding |
| MSTRG.189798.1  |              | XLOC_196718 | 303 coding  | noncoding | noncoding | noncoding |
| MSTRG.189834.1  |              | XLOC_196722 | 318 coding  | noncoding | noncoding | noncoding |
| MSTRG.189857.1  |              | XLOC_196737 | 290 coding  | noncoding | noncoding | noncoding |
| MSTRG.189888.1  |              | XLOC_196760 | 296 coding  | noncoding | noncoding | noncoding |

|                |                  |             |              |           |           |           |
|----------------|------------------|-------------|--------------|-----------|-----------|-----------|
| MSTRG.190042.1 |                  | XLOC_196780 | 498 coding   | noncoding | noncoding | noncoding |
| MSTRG.190073.1 | BEAN1            | XLOC_196792 | 258 coding   | noncoding | noncoding | noncoding |
| XM_011523005.2 | TERB1            | XLOC_196807 | 3048 coding  | coding    | coding    | coding    |
| MSTRG.190123.1 | TERB1            | XLOC_196808 | 293 coding   | noncoding | noncoding | noncoding |
| MSTRG.190127.1 |                  | XLOC_196821 | 211 coding   | noncoding | noncoding | noncoding |
| MSTRG.190181.2 | TMEM208          | XLOC_196836 | 329 coding   | coding    | noncoding | noncoding |
| MSTRG.190169.1 | SLC9A5           | XLOC_196837 | 236 coding   | noncoding | noncoding | noncoding |
| MSTRG.190186.1 | LRRC36           | XLOC_196840 | 310 coding   | noncoding | noncoding | noncoding |
| MSTRG.190188.1 | LRRC36           | XLOC_196842 | 250 coding   | noncoding | noncoding | noncoding |
| MSTRG.190274.1 | RANBP10          | XLOC_196877 | 308 coding   | noncoding | noncoding | noncoding |
| MSTRG.190275.1 | RANBP10          | XLOC_196878 | 738 coding   | noncoding | noncoding | noncoding |
| MSTRG.190297.1 |                  | XLOC_196893 | 242 coding   | noncoding | noncoding | noncoding |
| XM_005256031.4 | SMPD3            | XLOC_196905 | 5716 coding  | noncoding | coding    | coding    |
| MSTRG.190340.3 | ZFP90            | XLOC_196915 | 3169 coding  | coding    | noncoding | coding    |
| MSTRG.190329.1 |                  | XLOC_196916 | 285 coding   | noncoding | noncoding | noncoding |
| MSTRG.190333.1 | CDH3             | XLOC_196919 | 233 coding   | noncoding | noncoding | noncoding |
| MSTRG.190355.2 | TANGO6           | XLOC_196925 | 2916 coding  | coding    | coding    | noncoding |
| MSTRG.190371.1 |                  | XLOC_196930 | 314 coding   | noncoding | noncoding | noncoding |
| XR_001751974.1 | TERF2            | XLOC_196936 | 3046 coding  | coding    | coding    | coding    |
| MSTRG.190385.1 |                  | XLOC_196938 | 235 coding   | noncoding | noncoding | noncoding |
| MSTRG.190396.1 |                  | XLOC_196944 | 237 coding   | noncoding | noncoding | noncoding |
| NM_014062.3    | NOB1             | XLOC_196951 | 1716 coding  | coding    | coding    | coding    |
| MSTRG.190469.2 | WWP2             | XLOC_196954 | 5475 coding  | coding    | coding    | coding    |
| MSTRG.190469.6 | WWP2             | XLOC_196954 | 909 coding   | coding    | noncoding | noncoding |
| MSTRG.190487.1 | CLEC18A          | XLOC_196962 | 207 coding   | noncoding | noncoding | noncoding |
| MSTRG.190454.1 | PDXDC2P-NPIPB14P | XLOC_196969 | 285 coding   | noncoding | noncoding | noncoding |
| MSTRG.190563.1 | AARS             | XLOC_196982 | 267 coding   | noncoding | noncoding | noncoding |
| MSTRG.190564.1 | AARS             | XLOC_196983 | 239 coding   | noncoding | noncoding | noncoding |
| MSTRG.190576.1 | ST3GAL2          | XLOC_196991 | 281 coding   | noncoding | noncoding | noncoding |
| MSTRG.190504.1 | MTSS2            | XLOC_197001 | 260 coding   | noncoding | noncoding | noncoding |
| XM_011523148.1 | HYDIN            | XLOC_197008 | 21115 coding | coding    | noncoding | coding    |
| MSTRG.190517.1 | HYDIN            | XLOC_197009 | 233 coding   | noncoding | noncoding | noncoding |
| MSTRG.190521.1 | HYDIN            | XLOC_197011 | 353 coding   | noncoding | noncoding | noncoding |
| NM_001304493.2 | ZNF23            | XLOC_197020 | 2799 coding  | coding    | coding    | coding    |
| MSTRG.190550.1 | CHST4            | XLOC_197023 | 230 coding   | noncoding | noncoding | noncoding |
| MSTRG.190536.1 |                  | XLOC_197025 | 265 coding   | noncoding | noncoding | noncoding |
| MSTRG.190596.1 | MARVELD3         | XLOC_197028 | 222 coding   | noncoding | noncoding | noncoding |
| MSTRG.190602.1 | AP1G1            | XLOC_197033 | 463 coding   | noncoding | noncoding | noncoding |
| XM_017023419.1 | ZNF821           | XLOC_197043 | 1847 coding  | noncoding | coding    | coding    |
| MSTRG.190610.1 |                  | XLOC_197046 | 253 coding   | noncoding | noncoding | noncoding |
| MSTRG.190613.4 | IST1             | XLOC_197047 | 2442 coding  | coding    | noncoding | coding    |
| MSTRG.190624.1 | PKD1L3           | XLOC_197050 | 267 coding   | noncoding | noncoding | noncoding |
| MSTRG.190625.1 | PKD1L3           | XLOC_197051 | 242 coding   | noncoding | noncoding | noncoding |

|                 |              |             |             |           |           |           |
|-----------------|--------------|-------------|-------------|-----------|-----------|-----------|
| MSTRG.190897.1  | ZFHX3        | XLOC_197098 | 207 coding  | noncoding | noncoding | noncoding |
| MSTRG.190663.1  | C16orf47     | XLOC_197106 | 322 coding  | noncoding | noncoding | noncoding |
| MSTRG.190643.1  |              | XLOC_197119 | 238 coding  | noncoding | noncoding | noncoding |
| MSTRG.190650.1  |              | XLOC_197123 | 223 coding  | noncoding | noncoding | noncoding |
| MSTRG.190696.1  |              | XLOC_197128 | 325 coding  | noncoding | noncoding | noncoding |
| MSTRG.190727.1  | LOC283922    | XLOC_197131 | 289 coding  | noncoding | noncoding | noncoding |
| XR_002957808.1  | CLEC18B      | XLOC_197136 | 2581 coding | coding    | coding    | coding    |
| MSTRG.190709.1  | LOC107984827 | XLOC_197137 | 414 coding  | noncoding | noncoding | noncoding |
| MSTRG.190916.1  | MLKL         | XLOC_197157 | 266 coding  | noncoding | noncoding | noncoding |
| MSTRG.190749.1  |              | XLOC_197158 | 247 coding  | noncoding | noncoding | noncoding |
| MSTRG.190751.1  |              | XLOC_197162 | 349 coding  | noncoding | noncoding | noncoding |
| MSTRG.190759.1  |              | XLOC_197163 | 236 coding  | noncoding | noncoding | noncoding |
| MSTRG.190929.1  | ZFP1         | XLOC_197197 | 389 coding  | noncoding | noncoding | noncoding |
| MSTRG.191000.1  | CFDP1        | XLOC_197207 | 206 coding  | noncoding | noncoding | noncoding |
| NR_074083.2     | TMEM231      | XLOC_197213 | 4370 coding | coding    | coding    | coding    |
| MSTRG.191061.1  |              | XLOC_197256 | 348 coding  | coding    | noncoding | noncoding |
| MSTRG.191088.1  | ADAMTS18     | XLOC_197266 | 293 coding  | noncoding | noncoding | noncoding |
| MSTRG.191109.1  | VAT1L        | XLOC_197277 | 262 coding  | noncoding | noncoding | noncoding |
| MSTRG.191097.1  |              | XLOC_197283 | 319 coding  | noncoding | noncoding | noncoding |
| MSTRG.192443.1  | WWOX         | XLOC_197378 | 739 coding  | noncoding | noncoding | noncoding |
| XM_017023234.2  | MAF          | XLOC_197436 | 6560 coding | coding    | coding    | coding    |
| MSTRG.192516.1  | MAF          | XLOC_197439 | 299 coding  | noncoding | noncoding | noncoding |
| MSTRG.192524.1  | MAF          | XLOC_197442 | 271 coding  | noncoding | noncoding | noncoding |
| MSTRG.192536.1  | MAF          | XLOC_197445 | 246 coding  | noncoding | noncoding | noncoding |
| MSTRG.191180.1  | LOC102724084 | XLOC_197486 | 219 coding  | noncoding | noncoding | noncoding |
| MSTRG.191197.1  | GCSH         | XLOC_197515 | 309 coding  | noncoding | noncoding | noncoding |
| MSTRG.191375.7  |              | XLOC_197535 | 1168 coding | noncoding | noncoding | noncoding |
| MSTRG.191309.1  |              | XLOC_197556 | 225 coding  | noncoding | noncoding | noncoding |
| MSTRG.191424.1  | CDH13        | XLOC_197575 | 554 coding  | noncoding | noncoding | noncoding |
| MSTRG.191431.1  | CDH13        | XLOC_197578 | 295 coding  | noncoding | noncoding | noncoding |
| MSTRG.191433.1  | CDH13        | XLOC_197579 | 222 coding  | noncoding | noncoding | noncoding |
| MSTRG.191464.1  | CDH13        | XLOC_197597 | 249 coding  | noncoding | noncoding | noncoding |
| MSTRG.191500.1  | HSDL1        | XLOC_197631 | 244 coding  | noncoding | noncoding | noncoding |
| MSTRG.191525.15 | TAF1C        | XLOC_197632 | 595 coding  | noncoding | noncoding | noncoding |
| MSTRG.191517.1  | ADAD2        | XLOC_197635 | 261 coding  | coding    | noncoding | noncoding |
| MSTRG.191512.1  |              | XLOC_197636 | 313 coding  | noncoding | noncoding | noncoding |
| MSTRG.191518.1  |              | XLOC_197638 | 244 coding  | noncoding | noncoding | noncoding |
| MSTRG.191530.1  | ATP2C2       | XLOC_197642 | 284 coding  | noncoding | noncoding | noncoding |
| MSTRG.191553.1  |              | XLOC_197651 | 240 coding  | noncoding | noncoding | noncoding |
| MSTRG.191608.1  | FAM92B       | XLOC_197676 | 245 coding  | noncoding | noncoding | noncoding |
| MSTRG.191680.1  | GSE1         | XLOC_197681 | 229 coding  | noncoding | coding    | noncoding |
| MSTRG.191682.1  | GSE1         | XLOC_197682 | 319 coding  | noncoding | noncoding | noncoding |
| MSTRG.191725.1  | FOXL1        | XLOC_197719 | 249 coding  | noncoding | noncoding | noncoding |

|                 |              |             |             |           |           |           |
|-----------------|--------------|-------------|-------------|-----------|-----------|-----------|
| MSTRG.191738.1  |              | XLOC_197727 | 266 coding  | noncoding | noncoding | noncoding |
| XM_017023082.2  | ZCCHC14      | XLOC_197751 | 3874 coding | coding    | coding    | coding    |
| MSTRG.191832.1  | JPH3         | XLOC_197755 | 280 coding  | noncoding | noncoding | noncoding |
| MSTRG.191846.1  | KLHDC4       | XLOC_197759 | 287 coding  | noncoding | noncoding | noncoding |
| MSTRG.191850.1  | LOC105371399 | XLOC_197761 | 257 coding  | noncoding | noncoding | noncoding |
| MSTRG.191824.1  | CA5A         | XLOC_197769 | 255 coding  | noncoding | noncoding | noncoding |
| MSTRG.191883.1  |              | XLOC_197822 | 1806 coding | noncoding | coding    | noncoding |
| NM_178310.4     | SNAI3        | XLOC_197834 | 1740 coding | coding    | coding    | coding    |
| MSTRG.191957.2  | PIEZO1       | XLOC_197839 | 313 coding  | noncoding | noncoding | noncoding |
| MSTRG.191984.1  |              | XLOC_197861 | 250 coding  | noncoding | noncoding | noncoding |
| XR_933890.2     | LOC105371413 | XLOC_197872 | 2546 coding | noncoding | coding    | noncoding |
| MSTRG.192126.19 | ANKRD11      | XLOC_197873 | 413 coding  | noncoding | coding    | noncoding |
| MSTRG.192145.1  | ANKRD11      | XLOC_197885 | 248 coding  | noncoding | noncoding | noncoding |
| MSTRG.192044.4  | SPG7         | XLOC_197895 | 1380 coding | coding    | coding    | noncoding |
| MSTRG.192087.1  | SPIRE2       | XLOC_197916 | 285 coding  | noncoding | noncoding | noncoding |
| MSTRG.192080.1  |              | XLOC_197920 | 287 coding  | noncoding | noncoding | noncoding |
| MSTRG.192106.4  | DEF8         | XLOC_197921 | 1502 coding | coding    | coding    | coding    |
| MSTRG.192193.1  | FAM157C      | XLOC_197936 | 3369 coding | noncoding | noncoding | noncoding |
| MSTRG.192200.1  | FAM157C      | XLOC_197937 | 845 coding  | coding    | coding    | coding    |
| MSTRG.192201.1  | FAM157C      | XLOC_197938 | 227 coding  | noncoding | noncoding | noncoding |
| MSTRG.192246.1  |              | XLOC_197987 | 265 coding  | noncoding | noncoding | noncoding |
| MSTRG.192248.1  |              | XLOC_197988 | 265 coding  | noncoding | noncoding | noncoding |
| MSTRG.192281.1  | SLC43A2      | XLOC_198006 | 846 coding  | noncoding | noncoding | noncoding |
| MSTRG.192577.1  | RTN4RL1      | XLOC_198029 | 247 coding  | noncoding | noncoding | noncoding |
| MSTRG.192579.1  | RTN4RL1      | XLOC_198031 | 221 coding  | noncoding | noncoding | noncoding |
| MSTRG.192571.1  |              | XLOC_198035 | 242 coding  | noncoding | noncoding | noncoding |
| XR_002958096.1  | SGSM2        | XLOC_198041 | 5734 coding | coding    | coding    | coding    |
| MSTRG.192608.1  | MNT          | XLOC_198046 | 1412 coding | noncoding | noncoding | coding    |
| MSTRG.192600.1  |              | XLOC_198054 | 243 coding  | noncoding | noncoding | noncoding |
| MSTRG.192602.1  |              | XLOC_198056 | 238 coding  | noncoding | noncoding | noncoding |
| XM_011523901.2  | PAFAH1B1     | XLOC_198057 | 5331 coding | coding    | coding    | coding    |
| MSTRG.192693.1  | RAP1GAP2     | XLOC_198074 | 266 coding  | noncoding | noncoding | noncoding |
| MSTRG.192706.1  | TRPV1        | XLOC_198098 | 363 coding  | noncoding | noncoding | noncoding |
| MSTRG.192707.1  | TRPV1        | XLOC_198099 | 458 coding  | noncoding | noncoding | noncoding |
| MSTRG.192728.1  | ITGAE        | XLOC_198109 | 332 coding  | noncoding | noncoding | noncoding |
| MSTRG.192745.1  | ATP2A3       | XLOC_198120 | 5129 coding | coding    | coding    | coding    |
| NR_146884.1     | LINC01975    | XLOC_198121 | 1795 coding | noncoding | coding    | noncoding |
| XM_017024183.2  | CYB5D2       | XLOC_198122 | 1300 coding | coding    | coding    | coding    |
| MSTRG.192750.1  |              | XLOC_198126 | 239 coding  | noncoding | noncoding | noncoding |
| MSTRG.192751.1  |              | XLOC_198127 | 250 coding  | noncoding | noncoding | noncoding |
| MSTRG.192753.1  |              | XLOC_198128 | 280 coding  | noncoding | noncoding | noncoding |
| MSTRG.192801.1  | LOC105371499 | XLOC_198147 | 234 coding  | noncoding | noncoding | noncoding |
| XR_002958023.1  | PLD2         | XLOC_198163 | 3783 coding | coding    | coding    | coding    |

|                 |              |             |              |           |           |           |
|-----------------|--------------|-------------|--------------|-----------|-----------|-----------|
| MSTRG.192843.11 | PLD2         | XLOC_198163 | 226 coding   | noncoding | noncoding | noncoding |
| MSTRG.192842.1  |              | XLOC_198164 | 250 coding   | noncoding | noncoding | noncoding |
| MSTRG.192852.1  | MINK1        | XLOC_198167 | 217 coding   | noncoding | noncoding | noncoding |
| MSTRG.192854.1  | MINK1        | XLOC_198169 | 287 coding   | noncoding | noncoding | noncoding |
| XM_017024427.2  | RNF167       | XLOC_198172 | 1777 coding  | coding    | coding    | coding    |
| MSTRG.192876.1  | INCA1        | XLOC_198178 | 277 coding   | noncoding | noncoding | noncoding |
| MSTRG.192970.11 | NLRP1        | XLOC_198204 | 1619 coding  | coding    | coding    | coding    |
| MSTRG.192913.1  | LOC339166    | XLOC_198214 | 269 coding   | noncoding | noncoding | noncoding |
| MSTRG.192930.1  |              | XLOC_198224 | 236 coding   | noncoding | noncoding | noncoding |
| MSTRG.192943.1  | PITPNM3      | XLOC_198229 | 238 coding   | noncoding | coding    | noncoding |
| MSTRG.192947.1  | PITPNM3      | XLOC_198231 | 298 coding   | noncoding | noncoding | noncoding |
| MSTRG.193035.1  | ALOX15P1     | XLOC_198239 | 324 coding   | noncoding | noncoding | noncoding |
| MSTRG.193088.1  | ALOX12-AS1   | XLOC_198276 | 292 coding   | noncoding | noncoding | noncoding |
| MSTRG.193081.1  |              | XLOC_198283 | 457 coding   | noncoding | noncoding | noncoding |
| XR_934022.2     | ACADVL       | XLOC_198297 | 2098 coding  | coding    | coding    | coding    |
| NM_001198623.1  | TNFSF13      | XLOC_198321 | 2192 coding  | coding    | coding    | coding    |
| NM_020877.4     | DNAH2        | XLOC_198335 | 14532 coding | coding    | noncoding | coding    |
| XM_006721423.3  | CHD3         | XLOC_198342 | 7439 coding  | coding    | coding    | coding    |
| MSTRG.193199.1  | CNTROB       | XLOC_198351 | 240 coding   | noncoding | noncoding | noncoding |
| NM_000180.3     | GUCY2D       | XLOC_198358 | 3623 coding  | coding    | coding    | coding    |
| MSTRG.193219.1  |              | XLOC_198385 | 466 coding   | noncoding | noncoding | noncoding |
| XM_024450804.1  | PFAS         | XLOC_198392 | 5584 coding  | coding    | coding    | coding    |
| MSTRG.193275.1  |              | XLOC_198401 | 269 coding   | noncoding | noncoding | noncoding |
| MSTRG.193290.1  |              | XLOC_198402 | 212 coding   | noncoding | noncoding | noncoding |
| MSTRG.193287.1  |              | XLOC_198403 | 274 coding   | noncoding | noncoding | noncoding |
| MSTRG.193282.4  | RPL26        | XLOC_198409 | 560 coding   | coding    | noncoding | noncoding |
| MSTRG.193351.1  | MYH10        | XLOC_198422 | 256 coding   | noncoding | noncoding | noncoding |
| MSTRG.193355.1  |              | XLOC_198455 | 279 coding   | noncoding | noncoding | noncoding |
| MSTRG.193359.1  | NTN1         | XLOC_198457 | 284 coding   | noncoding | noncoding | noncoding |
| MSTRG.193361.1  | NTN1         | XLOC_198459 | 305 coding   | noncoding | noncoding | noncoding |
| MSTRG.193390.1  | USP43        | XLOC_198474 | 277 coding   | noncoding | noncoding | noncoding |
| MSTRG.193391.1  | USP43        | XLOC_198475 | 274 coding   | noncoding | noncoding | noncoding |
| MSTRG.193448.1  |              | XLOC_198485 | 222 coding   | noncoding | noncoding | noncoding |
| MSTRG.193450.1  |              | XLOC_198486 | 259 coding   | noncoding | noncoding | noncoding |
| MSTRG.193449.1  |              | XLOC_198488 | 233 coding   | noncoding | noncoding | noncoding |
| MSTRG.193465.1  |              | XLOC_198510 | 285 coding   | noncoding | noncoding | noncoding |
| NM_207386.4     | SHISA6       | XLOC_198522 | 7625 coding  | coding    | coding    | coding    |
| MSTRG.193491.1  | SHISA6       | XLOC_198523 | 322 coding   | noncoding | noncoding | noncoding |
| MSTRG.193717.1  | DNAH9        | XLOC_198536 | 306 coding   | noncoding | noncoding | noncoding |
| MSTRG.193726.1  | LOC101928350 | XLOC_198541 | 237 coding   | noncoding | noncoding | noncoding |
| MSTRG.193727.1  | LOC101928350 | XLOC_198542 | 251 coding   | noncoding | noncoding | noncoding |
| XM_005256753.3  | MAP2K4       | XLOC_198551 | 3636 coding  | coding    | coding    | coding    |
| MSTRG.193752.1  | MAP2K4       | XLOC_198562 | 294 coding   | noncoding | noncoding | noncoding |

|                 |              |             |              |           |           |           |
|-----------------|--------------|-------------|--------------|-----------|-----------|-----------|
| XM_005256864.1  | MYOCD        | XLOC_198593 | 8609 coding  | coding    | coding    | coding    |
| MSTRG.193611.1  | MYOCD        | XLOC_198594 | 290 coding   | noncoding | noncoding | noncoding |
| MSTRG.193619.1  | MYOCD        | XLOC_198597 | 250 coding   | noncoding | noncoding | noncoding |
| MSTRG.193575.1  |              | XLOC_198603 | 314 coding   | noncoding | noncoding | noncoding |
| MSTRG.193582.1  |              | XLOC_198608 | 236 coding   | noncoding | noncoding | noncoding |
| MSTRG.193585.1  |              | XLOC_198610 | 268 coding   | noncoding | noncoding | noncoding |
| MSTRG.193649.1  |              | XLOC_198700 | 304 coding   | noncoding | noncoding | noncoding |
| MSTRG.193654.1  | HS3ST3B1     | XLOC_198703 | 268 coding   | noncoding | noncoding | noncoding |
| MSTRG.193647.1  |              | XLOC_198712 | 296 coding   | noncoding | noncoding | noncoding |
| MSTRG.193667.1  |              | XLOC_198717 | 217 coding   | noncoding | noncoding | noncoding |
| MSTRG.193684.1  |              | XLOC_198725 | 260 coding   | noncoding | noncoding | noncoding |
| MSTRG.193709.1  | CDRT1        | XLOC_198749 | 264 coding   | noncoding | noncoding | noncoding |
| MSTRG.193703.1  |              | XLOC_198752 | 349 coding   | noncoding | noncoding | noncoding |
| MSTRG.193813.1  |              | XLOC_198767 | 321 coding   | noncoding | noncoding | noncoding |
| XM_011523659.3  | ADORA2B      | XLOC_198770 | 1565 coding  | coding    | coding    | coding    |
| MSTRG.194023.1  | ADORA2B      | XLOC_198771 | 269 coding   | noncoding | noncoding | noncoding |
| MSTRG.194031.6  | TTC19        | XLOC_198776 | 15891 coding | coding    | coding    | coding    |
| MSTRG.194031.13 | TTC19        | XLOC_198776 | 2858 coding  | noncoding | noncoding | noncoding |
| MSTRG.194031.14 | NCOR1        | XLOC_198776 | 9397 coding  | coding    | coding    | noncoding |
| MSTRG.193933.1  |              | XLOC_198795 | 250 coding   | noncoding | noncoding | noncoding |
| XM_017025429.2  | CCDC144A     | XLOC_198804 | 7409 coding  | coding    | coding    | coding    |
| MSTRG.193958.1  | TBC1D27P     | XLOC_198815 | 553 coding   | noncoding | noncoding | noncoding |
| MSTRG.193991.1  | MPRIP        | XLOC_198824 | 295 coding   | noncoding | noncoding | noncoding |
| MSTRG.193992.1  | MPRIP        | XLOC_198825 | 236 coding   | noncoding | noncoding | noncoding |
| MSTRG.193985.1  | FLCN         | XLOC_198835 | 285 coding   | noncoding | noncoding | noncoding |
| MSTRG.194006.1  |              | XLOC_198847 | 313 coding   | noncoding | coding    | noncoding |
| MSTRG.194055.1  |              | XLOC_198855 | 316 coding   | noncoding | noncoding | noncoding |
| NM_030665.4     | RAI1         | XLOC_198856 | 7677 coding  | coding    | coding    | coding    |
| MSTRG.194088.1  | RAI1         | XLOC_198860 | 236 coding   | noncoding | coding    | noncoding |
| MSTRG.194146.1  | GID4         | XLOC_198888 | 222 coding   | noncoding | noncoding | noncoding |
| MSTRG.194106.1  |              | XLOC_198889 | 292 coding   | noncoding | noncoding | noncoding |
| MSTRG.194107.1  |              | XLOC_198890 | 259 coding   | noncoding | noncoding | noncoding |
| XM_017024715.2  | MYO15A       | XLOC_198892 | 12668 coding | coding    | noncoding | coding    |
| MSTRG.194196.1  | TRIM16L      | XLOC_198917 | 277 coding   | noncoding | noncoding | noncoding |
| NR_051988.1     | FBXW10       | XLOC_198919 | 3484 coding  | coding    | coding    | coding    |
| MSTRG.194201.1  |              | XLOC_198925 | 246 coding   | noncoding | noncoding | noncoding |
| NM_001353100.2  | PRPSAP2      | XLOC_198926 | 2041 coding  | coding    | coding    | coding    |
| MSTRG.194238.1  | LOC105371574 | XLOC_198943 | 303 coding   | noncoding | noncoding | noncoding |
| MSTRG.194243.1  |              | XLOC_198946 | 487 coding   | noncoding | noncoding | noncoding |
| MSTRG.194246.1  |              | XLOC_198951 | 267 coding   | noncoding | noncoding | noncoding |
| MSTRG.194280.1  | ALDH3A2      | XLOC_198953 | 301 coding   | noncoding | noncoding | noncoding |
| MSTRG.194293.6  | AKAP10       | XLOC_198963 | 3612 coding  | coding    | noncoding | noncoding |
| MSTRG.194510.1  | SPECC1       | XLOC_198968 | 210 coding   | noncoding | noncoding | noncoding |

|                |              |             |             |           |           |           |
|----------------|--------------|-------------|-------------|-----------|-----------|-----------|
| MSTRG.194515.1 | SPECC1       | XLOC_198972 | 215 coding  | noncoding | noncoding | noncoding |
| MSTRG.194550.1 | LOC100996294 | XLOC_198986 | 296 coding  | noncoding | noncoding | noncoding |
| MSTRG.194558.1 | LINC02088    | XLOC_198990 | 212 coding  | noncoding | noncoding | noncoding |
| MSTRG.194321.1 | CCDC144NL    | XLOC_198996 | 240 coding  | noncoding | noncoding | noncoding |
| MSTRG.194324.2 | USP22        | XLOC_198998 | 4857 coding | coding    | coding    | noncoding |
| MSTRG.194338.1 |              | XLOC_199014 | 242 coding  | noncoding | noncoding | noncoding |
| MSTRG.194374.1 |              | XLOC_199030 | 325 coding  | noncoding | noncoding | noncoding |
| MSTRG.194406.1 |              | XLOC_199040 | 291 coding  | noncoding | noncoding | noncoding |
| MSTRG.194413.1 |              | XLOC_199045 | 270 coding  | noncoding | noncoding | noncoding |
| MSTRG.194476.1 |              | XLOC_199087 | 264 coding  | noncoding | noncoding | noncoding |
| XM_017025279.1 | KSR1         | XLOC_199101 | 2309 coding | coding    | coding    | coding    |
| XM_017025271.1 | KSR1         | XLOC_199101 | 6710 coding | coding    | coding    | coding    |
| MSTRG.194573.1 | NOS2         | XLOC_199111 | 225 coding  | coding    | noncoding | noncoding |
| MSTRG.194579.1 |              | XLOC_199117 | 314 coding  | noncoding | noncoding | noncoding |
| MSTRG.194640.1 |              | XLOC_199128 | 239 coding  | noncoding | noncoding | noncoding |
| MSTRG.194613.1 |              | XLOC_199165 | 318 coding  | noncoding | noncoding | noncoding |
| XM_017025228.1 | FOXN1        | XLOC_199172 | 3653 coding | coding    | coding    | coding    |
| MSTRG.194629.1 | FOXN1        | XLOC_199175 | 300 coding  | noncoding | noncoding | noncoding |
| XR_001752596.1 | SUPT6H       | XLOC_199188 | 4590 coding | coding    | coding    | coding    |
| MSTRG.194727.1 | FAM222B      | XLOC_199217 | 256 coding  | noncoding | noncoding | noncoding |
| MSTRG.194790.1 |              | XLOC_199241 | 212 coding  | noncoding | noncoding | noncoding |
| MSTRG.194788.1 |              | XLOC_199244 | 345 coding  | noncoding | noncoding | noncoding |
| MSTRG.194787.1 |              | XLOC_199245 | 283 coding  | noncoding | noncoding | noncoding |
| MSTRG.194798.1 |              | XLOC_199254 | 274 coding  | noncoding | noncoding | noncoding |
| MSTRG.194846.1 | TAOK1        | XLOC_199262 | 232 coding  | noncoding | noncoding | noncoding |
| MSTRG.194847.1 | TAOK1        | XLOC_199263 | 227 coding  | noncoding | noncoding | noncoding |
| MSTRG.194990.1 | SSH2         | XLOC_199293 | 303 coding  | noncoding | noncoding | noncoding |
| MSTRG.194878.1 | NSRP1        | XLOC_199345 | 291 coding  | noncoding | noncoding | noncoding |
| MSTRG.194895.1 | CPD          | XLOC_199370 | 229 coding  | noncoding | noncoding | noncoding |
| MSTRG.194902.1 | GOSR1        | XLOC_199376 | 269 coding  | noncoding | noncoding | noncoding |
| MSTRG.194904.1 | GOSR1        | XLOC_199378 | 316 coding  | coding    | noncoding | noncoding |
| MSTRG.194905.1 | GOSR1        | XLOC_199379 | 270 coding  | noncoding | noncoding | noncoding |
| NM_024857.5    | ATAD5        | XLOC_199392 | 6873 coding | coding    | coding    | coding    |
| XM_024450832.1 | ADAP2        | XLOC_199403 | 2763 coding | coding    | coding    | coding    |
| XR_002957953.1 | LOC107984974 | XLOC_199408 | 2806 coding | coding    | coding    | noncoding |
| MSTRG.195155.1 | LOC646030    | XLOC_199409 | 312 coding  | coding    | noncoding | noncoding |
| MSTRG.195173.1 | NF1          | XLOC_199412 | 276 coding  | noncoding | noncoding | noncoding |
| MSTRG.195089.1 | RAB11FIP4    | XLOC_199430 | 238 coding  | noncoding | noncoding | noncoding |
| MSTRG.195091.1 | RAB11FIP4    | XLOC_199431 | 209 coding  | noncoding | noncoding | noncoding |
| MSTRG.195063.1 |              | XLOC_199434 | 325 coding  | noncoding | noncoding | noncoding |
| MSTRG.195075.1 |              | XLOC_199443 | 403 coding  | noncoding | noncoding | noncoding |
| NM_052888.2    | LRRRC37B     | XLOC_199455 | 3027 coding | coding    | coding    | coding    |
| MSTRG.195207.1 | RHOT1        | XLOC_199465 | 364 coding  | noncoding | noncoding | noncoding |

|                   |              |             |             |           |           |           |
|-------------------|--------------|-------------|-------------|-----------|-----------|-----------|
| MSTRG. 195198. 1  |              | XLOC_199467 | 200 coding  | noncoding | noncoding | noncoding |
| NM_003457. 3      | ZNF207       | XLOC_199473 | 2275 coding | noncoding | coding    | coding    |
| XR_001752613. 2   | ZNF207       | XLOC_199473 | 4396 coding | noncoding | coding    | coding    |
| MSTRG. 195215. 1  |              | XLOC_199480 | 263 coding  | noncoding | noncoding | noncoding |
| MSTRG. 195221. 1  | PSMD11       | XLOC_199483 | 329 coding  | noncoding | noncoding | noncoding |
| MSTRG. 195396. 1  | MYO1D        | XLOC_199510 | 272 coding  | noncoding | noncoding | noncoding |
| MSTRG. 195240. 1  |              | XLOC_199525 | 258 coding  | noncoding | noncoding | noncoding |
| MSTRG. 195299. 1  | ASIC2        | XLOC_199529 | 410 coding  | noncoding | noncoding | noncoding |
| MSTRG. 195304. 1  | ASIC2        | XLOC_199531 | 303 coding  | noncoding | noncoding | noncoding |
| MSTRG. 195319. 1  | ASIC2        | XLOC_199537 | 263 coding  | coding    | noncoding | noncoding |
| MSTRG. 195329. 1  | ASIC2        | XLOC_199543 | 568 coding  | noncoding | noncoding | coding    |
| MSTRG. 195335. 1  | ASIC2        | XLOC_199547 | 240 coding  | noncoding | noncoding | noncoding |
| MSTRG. 195337. 1  | ASIC2        | XLOC_199548 | 302 coding  | coding    | noncoding | noncoding |
| MSTRG. 195342. 1  | ASIC2        | XLOC_199550 | 264 coding  | noncoding | noncoding | noncoding |
| MSTRG. 195344. 1  | ASIC2        | XLOC_199552 | 258 coding  | noncoding | noncoding | noncoding |
| MSTRG. 195244. 1  | LINC01989    | XLOC_199560 | 295 coding  | coding    | noncoding | noncoding |
| MSTRG. 195242. 1  |              | XLOC_199561 | 246 coding  | noncoding | noncoding | noncoding |
| MSTRG. 195426. 1  |              | XLOC_199630 | 261 coding  | noncoding | noncoding | noncoding |
| MSTRG. 195505. 12 | SLFN12L      | XLOC_199644 | 2644 coding | noncoding | noncoding | noncoding |
| MSTRG. 195527. 1  | LOC107985033 | XLOC_199647 | 8093 coding | coding    | coding    | noncoding |
| MSTRG. 195527. 3  | LOC107985033 | XLOC_199647 | 7086 coding | coding    | coding    | noncoding |
| XM_011524448. 2   | AP2B1        | XLOC_199651 | 5835 coding | coding    | coding    | coding    |
| XM_005257937. 4   | AP2B1        | XLOC_199651 | 3976 coding | coding    | coding    | coding    |
| XM_005276914. 3   | TBC1D3G      | XLOC_199681 | 3890 coding | coding    | coding    | coding    |
| XM_006722044. 3   | TADA2A       | XLOC_199709 | 4365 coding | coding    | coding    | coding    |
| XM_006722248. 2   | TBC1D3D      | XLOC_199720 | 3571 coding | coding    | coding    | coding    |
| XM_006722254. 2   | TBC1D3E      | XLOC_199722 | 2446 coding | coding    | coding    | coding    |
| XM_011525074. 2   | ARHGAP23     | XLOC_199727 | 5962 coding | coding    | coding    | coding    |
| MSTRG. 195685. 1  | RPL23        | XLOC_199735 | 497 coding  | coding    | noncoding | noncoding |
| MSTRG. 195685. 2  | RPL23        | XLOC_199735 | 508 coding  | coding    | noncoding | noncoding |
| MSTRG. 195671. 1  |              | XLOC_199739 | 287 coding  | noncoding | noncoding | noncoding |
| MSTRG. 195675. 1  | LOC105371767 | XLOC_199747 | 313 coding  | noncoding | noncoding | noncoding |
| MSTRG. 195721. 1  |              | XLOC_199767 | 209 coding  | noncoding | noncoding | noncoding |
| XM_024450801. 1   | CDK12        | XLOC_199768 | 7217 coding | coding    | coding    | coding    |
| MSTRG. 195749. 1  | CDK12        | XLOC_199769 | 234 coding  | noncoding | noncoding | noncoding |
| MSTRG. 195734. 1  |              | XLOC_199773 | 221 coding  | noncoding | noncoding | noncoding |
| MSTRG. 195777. 9  | IKZF3        | XLOC_199786 | 2175 coding | noncoding | coding    | coding    |
| MSTRG. 195773. 7  | LRRC3C       | XLOC_199792 | 2554 coding | coding    | coding    | noncoding |
| MSTRG. 195811. 1  |              | XLOC_199810 | 234 coding  | noncoding | noncoding | noncoding |
| MSTRG. 195831. 1  | WIPF2        | XLOC_199812 | 246 coding  | noncoding | noncoding | noncoding |
| NM_001254. 4      | CDC6         | XLOC_199813 | 4564 coding | coding    | coding    | coding    |
| MSTRG. 195855. 1  | LOC105371773 | XLOC_199825 | 216 coding  | noncoding | noncoding | noncoding |
| MSTRG. 195869. 2  | CCR7         | XLOC_199828 | 5320 coding | coding    | coding    | coding    |

|                 |           |             |             |           |           |           |
|-----------------|-----------|-------------|-------------|-----------|-----------|-----------|
| MSTRG.195866.1  |           | XLOC_199831 | 238 coding  | noncoding | noncoding | noncoding |
| MSTRG.195917.1  | KRT32     | XLOC_199858 | 296 coding  | noncoding | noncoding | noncoding |
| MSTRG.195973.6  | ACLY      | XLOC_199878 | 3990 coding | coding    | coding    | coding    |
| MSTRG.196017.1  | STAT5B    | XLOC_199895 | 738 coding  | noncoding | noncoding | noncoding |
| MSTRG.195989.1  |           | XLOC_199899 | 226 coding  | noncoding | noncoding | noncoding |
| XR_002958025.1  | ATP6V0A1  | XLOC_199903 | 4423 coding | coding    | coding    | coding    |
| MSTRG.196008.1  |           | XLOC_199915 | 318 coding  | noncoding | noncoding | noncoding |
| MSTRG.196009.1  |           | XLOC_199916 | 275 coding  | coding    | coding    | noncoding |
| MSTRG.196043.1  | VPS25     | XLOC_199925 | 340 coding  | noncoding | noncoding | noncoding |
| MSTRG.196075.1  | LINC00671 | XLOC_199935 | 254 coding  | noncoding | noncoding | noncoding |
| MSTRG.196092.1  | IFI35     | XLOC_199943 | 301 coding  | noncoding | noncoding | noncoding |
| XM_011524813.2  | NBR1      | XLOC_199952 | 4946 coding | coding    | coding    | coding    |
| MSTRG.196095.1  |           | XLOC_199961 | 289 coding  | noncoding | noncoding | noncoding |
| NM_001322216.1  | DHX8      | XLOC_199986 | 4392 coding | coding    | coding    | coding    |
| MSTRG.196177.1  | DHX8      | XLOC_199987 | 357 coding  | noncoding | noncoding | noncoding |
| MSTRG.196130.1  |           | XLOC_199995 | 409 coding  | noncoding | noncoding | noncoding |
| MSTRG.196140.1  | MEOX1     | XLOC_199997 | 303 coding  | noncoding | noncoding | noncoding |
| XR_934769.3     | LINC02594 | XLOC_200000 | 4527 coding | noncoding | noncoding | noncoding |
| XM_006721721.3  | CD300LG   | XLOC_200008 | 2967 coding | coding    | coding    | coding    |
| MSTRG.196203.1  | PYY       | XLOC_200014 | 212 coding  | noncoding | noncoding | noncoding |
| MSTRG.196228.3  | HDAC5     | XLOC_200027 | 2830 coding | coding    | coding    | coding    |
| NM_024032.5     | C17orf53  | XLOC_200030 | 2701 coding | coding    | coding    | coding    |
| NM_001353191.2  | TMUB2     | XLOC_200036 | 2451 coding | coding    | coding    | coding    |
| XM_017025054.1  | TMUB2     | XLOC_200036 | 2302 coding | coding    | coding    | coding    |
| MSTRG.196260.4  | UBTF      | XLOC_200040 | 1091 coding | noncoding | noncoding | noncoding |
| MSTRG.196260.5  | UBTF      | XLOC_200040 | 1092 coding | noncoding | noncoding | noncoding |
| MSTRG.196260.3  | UBTF      | XLOC_200040 | 1090 coding | noncoding | noncoding | noncoding |
| MSTRG.196236.1  |           | XLOC_200042 | 319 coding  | noncoding | noncoding | noncoding |
| XR_001752408.2  | RUNDC3A   | XLOC_200044 | 2564 coding | coding    | coding    | coding    |
| MSTRG.196247.1  | FAM171A2  | XLOC_200047 | 332 coding  | coding    | coding    | noncoding |
| MSTRG.196269.1  |           | XLOC_200054 | 445 coding  | noncoding | noncoding | noncoding |
| MSTRG.196275.1  |           | XLOC_200057 | 290 coding  | noncoding | noncoding | noncoding |
| XM_017025152.1  | DBF4B     | XLOC_200059 | 6223 coding | coding    | coding    | coding    |
| MSTRG.196297.1  |           | XLOC_200062 | 260 coding  | noncoding | noncoding | noncoding |
| XR_002958013.1  | NMT1      | XLOC_200071 | 5860 coding | coding    | coding    | coding    |
| MSTRG.196370.1  |           | XLOC_200083 | 215 coding  | noncoding | noncoding | noncoding |
| MSTRG.196405.6  | CDC27     | XLOC_200138 | 5393 coding | coding    | noncoding | noncoding |
| MSTRG.196405.11 | CDC27     | XLOC_200138 | 3887 coding | coding    | noncoding | noncoding |
| MSTRG.196410.1  |           | XLOC_200139 | 277 coding  | noncoding | noncoding | noncoding |
| MSTRG.196537.1  |           | XLOC_200176 | 225 coding  | noncoding | noncoding | noncoding |
| MSTRG.196550.1  | COPZ2     | XLOC_200182 | 303 coding  | noncoding | noncoding | noncoding |
| MSTRG.196570.3  | HOXB2     | XLOC_200197 | 1057 coding | coding    | coding    | noncoding |
| MSTRG.196595.1  | LINC02086 | XLOC_200213 | 318 coding  | noncoding | noncoding | noncoding |

|                  |              |             |             |           |           |           |
|------------------|--------------|-------------|-------------|-----------|-----------|-----------|
| MSTRG. 196600. 1 | TTLL6        | XLOC_200217 | 308 coding  | noncoding | noncoding | noncoding |
| MSTRG. 196601. 1 | TTLL6        | XLOC_200218 | 252 coding  | noncoding | noncoding | noncoding |
| MSTRG. 196602. 1 | TTLL6        | XLOC_200219 | 360 coding  | coding    | noncoding | noncoding |
| MSTRG. 196607. 1 |              | XLOC_200221 | 254 coding  | noncoding | noncoding | noncoding |
| MSTRG. 196612. 1 |              | XLOC_200231 | 294 coding  | noncoding | noncoding | noncoding |
| MSTRG. 196618. 1 |              | XLOC_200234 | 287 coding  | noncoding | noncoding | noncoding |
| MSTRG. 196652. 4 | ZNF652       | XLOC_200247 | 6548 coding | noncoding | noncoding | noncoding |
| MSTRG. 196670. 1 | LOC100288866 | XLOC_200255 | 274 coding  | coding    | noncoding | noncoding |
| MSTRG. 196674. 1 |              | XLOC_200261 | 337 coding  | noncoding | noncoding | noncoding |
| MSTRG. 196783. 1 |              | XLOC_200274 | 261 coding  | noncoding | noncoding | noncoding |
| MSTRG. 196832. 1 |              | XLOC_200297 | 332 coding  | noncoding | noncoding | noncoding |
| MSTRG. 196838. 1 |              | XLOC_200298 | 262 coding  | noncoding | noncoding | noncoding |
| MSTRG. 196839. 1 |              | XLOC_200299 | 230 coding  | noncoding | noncoding | noncoding |
| MSTRG. 196885. 1 |              | XLOC_200316 | 284 coding  | noncoding | noncoding | noncoding |
| MSTRG. 196914. 1 |              | XLOC_200331 | 243 coding  | noncoding | noncoding | noncoding |
| MSTRG. 196956. 1 |              | XLOC_200338 | 335 coding  | noncoding | noncoding | noncoding |
| MSTRG. 196973. 1 | CA10         | XLOC_200341 | 240 coding  | noncoding | noncoding | noncoding |
| MSTRG. 196976. 1 | CA10         | XLOC_200343 | 266 coding  | noncoding | noncoding | noncoding |
| MSTRG. 196993. 1 | CA10         | XLOC_200348 | 224 coding  | noncoding | noncoding | noncoding |
| MSTRG. 196964. 1 |              | XLOC_200351 | 297 coding  | noncoding | noncoding | noncoding |
| MSTRG. 196967. 1 |              | XLOC_200353 | 313 coding  | noncoding | noncoding | noncoding |
| MSTRG. 197009. 1 |              | XLOC_200368 | 243 coding  | noncoding | noncoding | noncoding |
| MSTRG. 197027. 1 |              | XLOC_200375 | 237 coding  | noncoding | noncoding | noncoding |
| MSTRG. 197042. 1 |              | XLOC_200386 | 307 coding  | noncoding | noncoding | noncoding |
| MSTRG. 197043. 1 |              | XLOC_200387 | 227 coding  | noncoding | noncoding | noncoding |
| MSTRG. 197044. 1 |              | XLOC_200388 | 312 coding  | noncoding | noncoding | noncoding |
| MSTRG. 197045. 1 |              | XLOC_200389 | 324 coding  | noncoding | noncoding | noncoding |
| MSTRG. 197046. 1 |              | XLOC_200390 | 303 coding  | noncoding | noncoding | noncoding |
| MSTRG. 197063. 1 |              | XLOC_200399 | 311 coding  | noncoding | noncoding | noncoding |
| MSTRG. 197064. 1 |              | XLOC_200400 | 326 coding  | noncoding | noncoding | noncoding |
| MSTRG. 197065. 1 |              | XLOC_200401 | 292 coding  | noncoding | noncoding | noncoding |
| MSTRG. 197066. 1 |              | XLOC_200402 | 288 coding  | noncoding | noncoding | noncoding |
| MSTRG. 197085. 1 |              | XLOC_200413 | 330 coding  | noncoding | noncoding | noncoding |
| XR_002957996. 1  | HLF          | XLOC_200424 | 4666 coding | noncoding | coding    | coding    |
| MSTRG. 197107. 1 | HLF          | XLOC_200427 | 312 coding  | noncoding | noncoding | noncoding |
| MSTRG. 197140. 1 |              | XLOC_200446 | 262 coding  | noncoding | noncoding | noncoding |
| MSTRG. 197144. 1 |              | XLOC_200449 | 281 coding  | noncoding | noncoding | noncoding |
| MSTRG. 197264. 1 | DGKE         | XLOC_200486 | 266 coding  | noncoding | coding    | noncoding |
| MSTRG. 197281. 1 |              | XLOC_200502 | 292 coding  | noncoding | noncoding | noncoding |
| MSTRG. 197397. 1 | MSI2         | XLOC_200515 | 290 coding  | noncoding | noncoding | noncoding |
| MSTRG. 197355. 4 | VEZF1        | XLOC_200540 | 5712 coding | coding    | coding    | coding    |
| MSTRG. 197417. 1 | TSPOAP1      | XLOC_200564 | 5115 coding | coding    | coding    | coding    |
| MSTRG. 197502. 1 | TEX14        | XLOC_200597 | 292 coding  | noncoding | noncoding | noncoding |

|                   |              |             |              |           |           |           |
|-------------------|--------------|-------------|--------------|-----------|-----------|-----------|
| MSTRG. 197508. 1  | RAD51C       | XLOC_200601 | 278 coding   | noncoding | noncoding | noncoding |
| MSTRG. 197511. 1  | LOC105371843 | XLOC_200603 | 265 coding   | noncoding | noncoding | noncoding |
| MSTRG. 197520. 1  | PPM1E        | XLOC_200609 | 228 coding   | noncoding | noncoding | noncoding |
| MSTRG. 197521. 1  | PPM1E        | XLOC_200610 | 249 coding   | noncoding | noncoding | noncoding |
| MSTRG. 197522. 1  | PPM1E        | XLOC_200611 | 257 coding   | noncoding | noncoding | noncoding |
| MSTRG. 197526. 1  | TRIM37       | XLOC_200613 | 229 coding   | noncoding | noncoding | noncoding |
| MSTRG. 197527. 3  | TRIM37       | XLOC_200614 | 3311 coding  | coding    | noncoding | noncoding |
| MSTRG. 197470. 1  |              | XLOC_200631 | 284 coding   | noncoding | noncoding | noncoding |
| MSTRG. 197482. 1  | LINC01476    | XLOC_200632 | 286 coding   | noncoding | coding    | noncoding |
| MSTRG. 197483. 1  | LINC01476    | XLOC_200633 | 294 coding   | noncoding | noncoding | noncoding |
| MSTRG. 197487. 1  | LINC01476    | XLOC_200634 | 214 coding   | noncoding | noncoding | noncoding |
| NM_001329397. 2   | VMP1         | XLOC_200640 | 3518 coding  | coding    | coding    | coding    |
| MSTRG. 197782. 1  | WFDC21P      | XLOC_200657 | 295 coding   | coding    | noncoding | noncoding |
| MSTRG. 197825. 1  | USP32        | XLOC_200664 | 251 coding   | noncoding | noncoding | noncoding |
| XM_005257036. 2   | C17orf64     | XLOC_200665 | 999 coding   | coding    | coding    | coding    |
| MSTRG. 197535. 1  |              | XLOC_200666 | 203 coding   | noncoding | noncoding | noncoding |
| MSTRG. 197541. 3  | APPBP2       | XLOC_200667 | 4148 coding  | coding    | noncoding | noncoding |
| MSTRG. 197536. 1  |              | XLOC_200669 | 296 coding   | noncoding | noncoding | noncoding |
| MSTRG. 197554. 1  | PPM1D        | XLOC_200676 | 278 coding   | noncoding | noncoding | noncoding |
| XR_001752547. 2   | BCAS3        | XLOC_200678 | 2455 coding  | coding    | coding    | coding    |
| MSTRG. 197730. 1  | BCAS3        | XLOC_200723 | 472 coding   | noncoding | noncoding | noncoding |
| MSTRG. 197597. 7  | MED13        | XLOC_200747 | 10316 coding | coding    | noncoding | noncoding |
| MSTRG. 197597. 8  | MED13        | XLOC_200747 | 11015 coding | coding    | coding    | noncoding |
| MSTRG. 197584. 1  |              | XLOC_200751 | 316 coding   | noncoding | noncoding | noncoding |
| MSTRG. 197595. 1  | EFCAB3       | XLOC_200757 | 261 coding   | noncoding | noncoding | noncoding |
| MSTRG. 197616. 1  | METTL2A      | XLOC_200760 | 272 coding   | noncoding | noncoding | noncoding |
| MSTRG. 197617. 1  | METTL2A      | XLOC_200761 | 656 coding   | noncoding | noncoding | noncoding |
| XR_002958144. 1   | LOC112268202 | XLOC_200773 | 2663 coding  | noncoding | coding    | noncoding |
| MSTRG. 197860. 1  | LOC105371857 | XLOC_200800 | 321 coding   | noncoding | noncoding | noncoding |
| MSTRG. 197663. 1  |              | XLOC_200809 | 301 coding   | noncoding | noncoding | noncoding |
| NR_073585. 1      | DCAF7        | XLOC_200812 | 1414 coding  | noncoding | coding    | coding    |
| MSTRG. 197893. 6  | DDX42        | XLOC_200823 | 3620 coding  | coding    | coding    | coding    |
| NM_001199163. 1   | PSMC5        | XLOC_200827 | 1495 coding  | coding    | coding    | coding    |
| MSTRG. 197872. 1  |              | XLOC_200831 | 299 coding   | noncoding | noncoding | noncoding |
| MSTRG. 197926. 1  |              | XLOC_200849 | 249 coding   | noncoding | noncoding | noncoding |
| MSTRG. 197929. 1  |              | XLOC_200857 | 234 coding   | noncoding | noncoding | noncoding |
| MSTRG. 197931. 1  |              | XLOC_200859 | 363 coding   | noncoding | noncoding | noncoding |
| MSTRG. 197961. 13 | PLEKHM1P1    | XLOC_200863 | 701 coding   | coding    | noncoding | noncoding |
| MSTRG. 197967. 1  | PLEKHM1P1    | XLOC_200864 | 539 coding   | noncoding | noncoding | noncoding |
| MSTRG. 197984. 1  |              | XLOC_200889 | 349 coding   | noncoding | noncoding | noncoding |
| MSTRG. 198073. 1  | CEP112       | XLOC_200919 | 294 coding   | noncoding | noncoding | noncoding |
| MSTRG. 198044. 1  | APOH         | XLOC_200926 | 260 coding   | noncoding | noncoding | noncoding |
| MSTRG. 198045. 1  | APOH         | XLOC_200927 | 336 coding   | coding    | noncoding | noncoding |

|                |              |             |              |           |           |           |
|----------------|--------------|-------------|--------------|-----------|-----------|-----------|
| MSTRG.198143.1 | PRKCA        | XLOC_200940 | 377 coding   | noncoding | noncoding | noncoding |
| MSTRG.198168.1 | PRKCA        | XLOC_200962 | 225 coding   | noncoding | noncoding | noncoding |
| MSTRG.198171.1 | PRKCA        | XLOC_200965 | 248 coding   | noncoding | noncoding | noncoding |
| MSTRG.198100.1 |              | XLOC_200983 | 248 coding   | noncoding | noncoding | noncoding |
| MSTRG.198187.1 | PITPNC1      | XLOC_200990 | 261 coding   | coding    | noncoding | noncoding |
| MSTRG.198201.1 | PITPNC1      | XLOC_201002 | 231 coding   | noncoding | noncoding | noncoding |
| MSTRG.198128.1 |              | XLOC_201016 | 240 coding   | noncoding | noncoding | noncoding |
| NM_004459.7    | BPTF         | XLOC_201018 | 11024 coding | coding    | noncoding | coding    |
| MSTRG.198238.1 | BPTF         | XLOC_201022 | 295 coding   | noncoding | noncoding | noncoding |
| MSTRG.198239.1 | BPTF         | XLOC_201023 | 476 coding   | noncoding | noncoding | noncoding |
| MSTRG.198259.1 | LOC105371870 | XLOC_201039 | 245 coding   | noncoding | noncoding | noncoding |
| NR_144443.1    | AMZ2         | XLOC_201041 | 2199 coding  | coding    | coding    | coding    |
| MSTRG.198267.1 | AMZ2         | XLOC_201044 | 257 coding   | noncoding | noncoding | noncoding |
| MSTRG.198283.7 | SLC16A6      | XLOC_201047 | 2286 coding  | coding    | coding    | coding    |
| XM_011525026.2 | MAP2K6       | XLOC_201097 | 13206 coding | coding    | coding    | coding    |
| MSTRG.198381.1 | MAP2K6       | XLOC_201102 | 301 coding   | noncoding | noncoding | noncoding |
| MSTRG.198404.1 | LINC01483    | XLOC_201113 | 225 coding   | coding    | noncoding | noncoding |
| MSTRG.198310.1 |              | XLOC_201117 | 218 coding   | noncoding | noncoding | noncoding |
| MSTRG.198430.1 |              | XLOC_201138 | 279 coding   | noncoding | noncoding | noncoding |
| MSTRG.198435.1 |              | XLOC_201141 | 243 coding   | coding    | noncoding | noncoding |
| NR_110124.1    | LINC01152    | XLOC_201159 | 3578 coding  | noncoding | noncoding | noncoding |
| MSTRG.198487.1 |              | XLOC_201167 | 654 coding   | noncoding | noncoding | noncoding |
| MSTRG.198505.1 | LINC00673    | XLOC_201180 | 322 coding   | noncoding | noncoding | noncoding |
| MSTRG.198510.1 | LINC00673    | XLOC_201183 | 256 coding   | noncoding | noncoding | noncoding |
| MSTRG.198517.1 |              | XLOC_201204 | 303 coding   | noncoding | noncoding | noncoding |
| MSTRG.198524.1 | CDC42EP4     | XLOC_201210 | 254 coding   | noncoding | noncoding | noncoding |
| MSTRG.198560.1 | LOC100134391 | XLOC_201229 | 305 coding   | noncoding | noncoding | noncoding |
| MSTRG.198565.1 | LINC00469    | XLOC_201232 | 461 coding   | noncoding | noncoding | noncoding |
| MSTRG.198575.1 |              | XLOC_201242 | 312 coding   | noncoding | noncoding | noncoding |
| MSTRG.198576.1 |              | XLOC_201243 | 296 coding   | noncoding | noncoding | noncoding |
| MSTRG.198585.1 |              | XLOC_201252 | 221 coding   | noncoding | noncoding | noncoding |
| XM_024450879.1 | DNAI2        | XLOC_201253 | 2647 coding  | noncoding | coding    | coding    |
| MSTRG.198594.1 | DNAI2        | XLOC_201254 | 291 coding   | noncoding | noncoding | noncoding |
| XM_017024150.1 | KIF19        | XLOC_201255 | 3685 coding  | coding    | coding    | coding    |
| MSTRG.198604.1 | KIF19        | XLOC_201256 | 244 coding   | noncoding | noncoding | noncoding |
| NM_001331076.1 | GPR142       | XLOC_201258 | 1487 coding  | coding    | coding    | coding    |
| MSTRG.198598.1 |              | XLOC_201259 | 230 coding   | noncoding | noncoding | noncoding |
| NM_001330456.1 | CD300A       | XLOC_201265 | 1815 coding  | coding    | coding    | coding    |
| XM_005256990.3 | CD300A       | XLOC_201265 | 1521 coding  | coding    | coding    | coding    |
| XM_006721656.3 | CD300A       | XLOC_201265 | 1928 coding  | coding    | coding    | coding    |
| MSTRG.198680.1 | LOC101928343 | XLOC_201278 | 264 coding   | noncoding | noncoding | noncoding |
| MSTRG.198723.1 | RAB37        | XLOC_201283 | 423 coding   | noncoding | noncoding | noncoding |
| MSTRG.198687.1 | FADS6        | XLOC_201295 | 252 coding   | noncoding | noncoding | noncoding |

|                   |              |             |              |           |           |           |
|-------------------|--------------|-------------|--------------|-----------|-----------|-----------|
| MSTRG. 198741. 1  | SLC16A5      | XLOC_201309 | 318 coding   | noncoding | noncoding | noncoding |
| MSTRG. 198711. 1  |              | XLOC_201313 | 415 coding   | noncoding | noncoding | noncoding |
| MSTRG. 198774. 3  | SLC25A19     | XLOC_201318 | 884 coding   | coding    | coding    | noncoding |
| MSTRG. 198753. 1  |              | XLOC_201329 | 272 coding   | noncoding | noncoding | noncoding |
| MSTRG. 198800. 1  | LLGL2        | XLOC_201335 | 294 coding   | noncoding | noncoding | noncoding |
| NR_028439. 1      | SMIM5        | XLOC_201340 | 4350 coding  | coding    | coding    | noncoding |
| MSTRG. 198817. 1  | UNK          | XLOC_201350 | 491 coding   | noncoding | noncoding | noncoding |
| MSTRG. 198848. 4  | ACOX1        | XLOC_201360 | 4441 coding  | coding    | coding    | coding    |
| MSTRG. 198880. 1  |              | XLOC_201376 | 234 coding   | noncoding | noncoding | noncoding |
| MSTRG. 198883. 1  |              | XLOC_201377 | 212 coding   | noncoding | noncoding | noncoding |
| MSTRG. 198904. 9  | RHBDF2       | XLOC_201384 | 4878 coding  | noncoding | coding    | noncoding |
| MSTRG. 198896. 1  |              | XLOC_201388 | 220 coding   | noncoding | noncoding | noncoding |
| MSTRG. 198925. 1  |              | XLOC_201389 | 231 coding   | noncoding | noncoding | noncoding |
| MSTRG. 198928. 1  | CYGB         | XLOC_201391 | 319 coding   | noncoding | noncoding | noncoding |
| MSTRG. 198935. 1  | SNHG16       | XLOC_201396 | 4731 coding  | coding    | coding    | noncoding |
| MSTRG. 198914. 1  | ST6GALNAC1   | XLOC_201400 | 286 coding   | noncoding | noncoding | noncoding |
| XM_011524352. 2   | MGAT5B       | XLOC_201417 | 3550 coding  | coding    | coding    | coding    |
| MSTRG. 198952. 1  |              | XLOC_201421 | 306 coding   | noncoding | noncoding | noncoding |
| NM_001204408. 2   | SEC14L1      | XLOC_201422 | 3320 coding  | coding    | coding    | coding    |
| MSTRG. 199044. 1  | SEPTIN9      | XLOC_201434 | 323 coding   | noncoding | noncoding | noncoding |
| MSTRG. 199072. 1  | SEPTIN9      | XLOC_201456 | 274 coding   | noncoding | noncoding | noncoding |
| MSTRG. 198978. 1  |              | XLOC_201460 | 268 coding   | noncoding | noncoding | noncoding |
| XR_001753032. 1   | LOC107985079 | XLOC_201462 | 3665 coding  | noncoding | coding    | noncoding |
| MSTRG. 198988. 1  |              | XLOC_201466 | 294 coding   | noncoding | noncoding | noncoding |
| MSTRG. 198997. 1  | LOC105371908 | XLOC_201469 | 319 coding   | noncoding | noncoding | noncoding |
| MSTRG. 199102. 1  |              | XLOC_201475 | 256 coding   | noncoding | noncoding | noncoding |
| MSTRG. 199105. 12 | TMC6         | XLOC_201478 | 3879 coding  | coding    | coding    | coding    |
| XM_017024001. 1   | C17orf99     | XLOC_201492 | 1343 coding  | coding    | coding    | coding    |
| MSTRG. 199088. 1  | C17orf99     | XLOC_201493 | 431 coding   | noncoding | noncoding | noncoding |
| MSTRG. 199095. 1  | AFMID        | XLOC_201496 | 306 coding   | noncoding | noncoding | noncoding |
| MSTRG. 199084. 1  |              | XLOC_201503 | 241 coding   | noncoding | noncoding | noncoding |
| MSTRG. 199147. 1  | SCAT1        | XLOC_201520 | 286 coding   | noncoding | noncoding | noncoding |
| MSTRG. 199096. 1  |              | XLOC_201521 | 251 coding   | noncoding | noncoding | noncoding |
| MSTRG. 199236. 14 | CYTH1        | XLOC_201525 | 3921 coding  | coding    | coding    | noncoding |
| MSTRG. 199157. 1  | CANT1        | XLOC_201534 | 3628 coding  | coding    | coding    | coding    |
| MSTRG. 199209. 1  | RBFOX3       | XLOC_201554 | 279 coding   | noncoding | noncoding | noncoding |
| MSTRG. 199213. 1  |              | XLOC_201571 | 327 coding   | noncoding | noncoding | noncoding |
| XM_024450821. 1   | CCDC40       | XLOC_201577 | 4851 coding  | coding    | coding    | coding    |
| MSTRG. 199283. 1  | CCDC40       | XLOC_201579 | 558 coding   | noncoding | noncoding | noncoding |
| MSTRG. 199331. 1  | RNF213       | XLOC_201589 | 242 coding   | coding    | noncoding | noncoding |
| NM_001352760. 2   | ENDOV        | XLOC_201592 | 1406 coding  | coding    | coding    | coding    |
| MSTRG. 199434. 1  | RPTOR        | XLOC_201614 | 246 coding   | noncoding | noncoding | noncoding |
| XM_017024898. 2   | BAHCC1       | XLOC_201656 | 10816 coding | coding    | noncoding | coding    |

|                |              |             |             |           |           |           |
|----------------|--------------|-------------|-------------|-----------|-----------|-----------|
| MSTRG.199408.1 | FSCN2        | XLOC_201661 | 256 coding  | noncoding | noncoding | noncoding |
| MSTRG.199455.5 | NPLOC4       | XLOC_201666 | 648 coding  | coding    | noncoding | noncoding |
| NR_110866.1    | TSPAN10      | XLOC_201668 | 1905 coding | coding    | coding    | coding    |
| MSTRG.199470.1 | PDE6G        | XLOC_201671 | 313 coding  | noncoding | noncoding | noncoding |
| MSTRG.199471.3 | OXLD1        | XLOC_201672 | 869 coding  | coding    | coding    | noncoding |
| MSTRG.199491.1 | MYADML2      | XLOC_201702 | 216 coding  | noncoding | noncoding | noncoding |
| XM_017025038.2 | ASPSCR1      | XLOC_201703 | 2212 coding | coding    | coding    | coding    |
| MSTRG.199526.1 | FASN         | XLOC_201714 | 323 coding  | noncoding | noncoding | noncoding |
| MSTRG.199528.1 | FASN         | XLOC_201716 | 1219 coding | coding    | coding    | noncoding |
| MSTRG.199534.1 |              | XLOC_201740 | 273 coding  | noncoding | noncoding | noncoding |
| NM_018949.2    | UTS2R        | XLOC_201747 | 1310 coding | coding    | coding    | coding    |
| MSTRG.199598.1 | LOC105371942 | XLOC_201760 | 253 coding  | noncoding | coding    | noncoding |
| MSTRG.199608.1 | RAB40B       | XLOC_201768 | 405 coding  | noncoding | noncoding | noncoding |
| XM_017024523.1 | METRNL       | XLOC_201775 | 1957 coding | noncoding | coding    | coding    |
| MSTRG.192245.1 |              | XLOC_201812 | 210 coding  | noncoding | noncoding | noncoding |
| MSTRG.192247.1 |              | XLOC_201813 | 253 coding  | noncoding | noncoding | noncoding |
| XM_024450768.1 | MYO1C        | XLOC_201817 | 5034 coding | coding    | coding    | coding    |
| MSTRG.192302.1 |              | XLOC_201833 | 264 coding  | noncoding | noncoding | noncoding |
| NM_178568.4    | RTN4RL1      | XLOC_201834 | 3614 coding | coding    | coding    | coding    |
| MSTRG.192575.1 | RTN4RL1      | XLOC_201835 | 284 coding  | noncoding | noncoding | noncoding |
| XM_005256571.5 | SMG6         | XLOC_201843 | 4547 coding | coding    | coding    | coding    |
| MSTRG.192664.1 | SMG6         | XLOC_201846 | 313 coding  | coding    | noncoding | noncoding |
| MSTRG.192665.1 | SMG6         | XLOC_201847 | 279 coding  | noncoding | noncoding | noncoding |
| MSTRG.192667.1 | SMG6         | XLOC_201849 | 255 coding  | noncoding | noncoding | noncoding |
| MSTRG.192668.1 | SMG6         | XLOC_201850 | 285 coding  | noncoding | noncoding | noncoding |
| MSTRG.192670.1 | SMG6         | XLOC_201851 | 334 coding  | noncoding | noncoding | noncoding |
| XM_017024654.2 | MNT          | XLOC_201862 | 7273 coding | noncoding | coding    | coding    |
| MSTRG.192689.1 | RAP1GAP2     | XLOC_201877 | 878 coding  | noncoding | coding    | noncoding |
| MSTRG.192695.1 | RAP1GAP2     | XLOC_201880 | 2603 coding | noncoding | coding    | noncoding |
| MSTRG.192647.1 | OR3A2        | XLOC_201892 | 255 coding  | noncoding | noncoding | noncoding |
| MSTRG.192642.1 |              | XLOC_201897 | 210 coding  | coding    | noncoding | noncoding |
| MSTRG.192658.1 | TRPV3        | XLOC_201901 | 207 coding  | noncoding | noncoding | noncoding |
| NM_080706.3    | TRPV1        | XLOC_201902 | 4416 coding | coding    | coding    | coding    |
| XM_024450740.1 | ITGAE        | XLOC_201909 | 5744 coding | coding    | coding    | coding    |
| NM_174956.2    | ATP2A3       | XLOC_201920 | 4827 coding | coding    | coding    | coding    |
| XM_011523882.2 | ATP2A3       | XLOC_201920 | 3901 coding | coding    | coding    | coding    |
| XR_934043.2    | ANKFY1       | XLOC_201931 | 2542 coding | coding    | coding    | coding    |
| MSTRG.192785.1 | ANKFY1       | XLOC_201933 | 236 coding  | noncoding | noncoding | noncoding |
| MSTRG.192758.1 | UBE2G1       | XLOC_201938 | 248 coding  | noncoding | noncoding | noncoding |
| MSTRG.192762.1 | UBE2G1       | XLOC_201942 | 206 coding  | noncoding | noncoding | noncoding |
| MSTRG.192755.1 |              | XLOC_201945 | 657 coding  | noncoding | noncoding | noncoding |
| MSTRG.192754.1 |              | XLOC_201946 | 282 coding  | noncoding | noncoding | noncoding |
| MSTRG.192793.1 | SPNS2        | XLOC_201954 | 315 coding  | noncoding | noncoding | noncoding |

|                |              |             |             |           |           |           |
|----------------|--------------|-------------|-------------|-----------|-----------|-----------|
| MSTRG.192805.1 | LINC01996    | XLOC_201959 | 220 coding  | noncoding | noncoding | noncoding |
| MSTRG.192807.1 | LINC01996    | XLOC_201960 | 216 coding  | noncoding | noncoding | noncoding |
| MSTRG.192814.1 | ALOX15       | XLOC_201962 | 280 coding  | noncoding | noncoding | noncoding |
| MSTRG.192802.1 | LOC105371499 | XLOC_201965 | 234 coding  | noncoding | noncoding | noncoding |
| MSTRG.192823.1 | PELP1        | XLOC_201967 | 245 coding  | noncoding | noncoding | noncoding |
| MSTRG.192803.1 |              | XLOC_201969 | 245 coding  | noncoding | noncoding | noncoding |
| MSTRG.192841.1 |              | XLOC_201983 | 252 coding  | noncoding | noncoding | noncoding |
| MSTRG.192848.1 |              | XLOC_201987 | 242 coding  | noncoding | noncoding | noncoding |
| MSTRG.192859.1 | PFN1         | XLOC_201988 | 791 coding  | coding    | coding    | coding    |
| XM_024450919.1 | ZNF232       | XLOC_202003 | 2473 coding | coding    | coding    | coding    |
| MSTRG.192964.1 | LOC100130950 | XLOC_202007 | 276 coding  | noncoding | noncoding | noncoding |
| MSTRG.192887.1 |              | XLOC_202017 | 273 coding  | noncoding | noncoding | noncoding |
| MSTRG.192910.1 | LOC339166    | XLOC_202040 | 244 coding  | noncoding | noncoding | noncoding |
| MSTRG.192907.1 |              | XLOC_202043 | 336 coding  | noncoding | noncoding | noncoding |
| MSTRG.192929.1 |              | XLOC_202053 | 286 coding  | noncoding | noncoding | noncoding |
| MSTRG.192933.1 |              | XLOC_202056 | 215 coding  | noncoding | noncoding | noncoding |
| XM_011524016.3 | PITPNM3      | XLOC_202060 | 4473 coding | coding    | coding    | coding    |
| MSTRG.192996.1 |              | XLOC_202086 | 277 coding  | noncoding | noncoding | noncoding |
| MSTRG.193080.1 |              | XLOC_202114 | 239 coding  | noncoding | noncoding | noncoding |
| MSTRG.193101.1 | ASGR2        | XLOC_202120 | 309 coding  | noncoding | noncoding | noncoding |
| MSTRG.193103.1 | LOC105371512 | XLOC_202121 | 273 coding  | noncoding | noncoding | noncoding |
| NM_001321075.2 | DLG4         | XLOC_202124 | 6183 coding | coding    | coding    | coding    |
| XM_011523972.2 | ZBTB4        | XLOC_202141 | 6225 coding | coding    | coding    | coding    |
| MSTRG.193147.4 | POLR2A       | XLOC_202142 | 2237 coding | coding    | coding    | coding    |
| MSTRG.193142.1 |              | XLOC_202143 | 237 coding  | noncoding | noncoding | noncoding |
| MSTRG.193168.1 | SHBG         | XLOC_202151 | 289 coding  | noncoding | noncoding | noncoding |
| XM_017024073.1 | SAT2         | XLOC_202152 | 1030 coding | coding    | coding    | coding    |
| MSTRG.193241.1 | DNAH2        | XLOC_202162 | 214 coding  | noncoding | noncoding | noncoding |
| MSTRG.193242.1 | DNAH2        | XLOC_202163 | 273 coding  | noncoding | noncoding | noncoding |
| MSTRG.193179.1 |              | XLOC_202182 | 251 coding  | noncoding | noncoding | noncoding |
| MSTRG.193185.1 | GUCY2D       | XLOC_202184 | 284 coding  | coding    | noncoding | noncoding |
| NM_002616.3    | PER1         | XLOC_202194 | 4676 coding | coding    | coding    | coding    |
| XR_001752643.1 | CTC1         | XLOC_202208 | 3817 coding | coding    | coding    | coding    |
| MSTRG.193298.1 | CTC1         | XLOC_202210 | 352 coding  | noncoding | noncoding | noncoding |
| MSTRG.193269.4 | SLC25A35     | XLOC_202216 | 717 coding  | coding    | coding    | noncoding |
| MSTRG.193276.1 |              | XLOC_202217 | 268 coding  | noncoding | noncoding | noncoding |
| MSTRG.193288.1 |              | XLOC_202218 | 274 coding  | noncoding | noncoding | noncoding |
| XM_017024165.2 | KRBA2        | XLOC_202220 | 2974 coding | noncoding | coding    | coding    |
| MSTRG.193329.2 | NDEL1        | XLOC_202225 | 2236 coding | coding    | noncoding | coding    |
| MSTRG.193350.1 | MYH10        | XLOC_202236 | 256 coding  | noncoding | noncoding | noncoding |
| MSTRG.193308.1 | LOC105371525 | XLOC_202238 | 278 coding  | noncoding | noncoding | noncoding |
| XM_005256633.4 | SPDYE4       | XLOC_202240 | 3352 coding | coding    | coding    | coding    |
| MSTRG.193440.1 | LOC107985063 | XLOC_202255 | 250 coding  | noncoding | noncoding | noncoding |

|                |              |             |             |           |           |           |
|----------------|--------------|-------------|-------------|-----------|-----------|-----------|
| MSTRG.193411.1 | STX8         | XLOC_202279 | 314 coding  | noncoding | noncoding | noncoding |
| MSTRG.193414.1 | STX8         | XLOC_202282 | 236 coding  | noncoding | noncoding | noncoding |
| MSTRG.193381.1 | CFAP52       | XLOC_202286 | 274 coding  | noncoding | noncoding | noncoding |
| XM_005256833.4 | GAS7         | XLOC_202294 | 8038 coding | coding    | coding    | coding    |
| MSTRG.193545.1 | GAS7         | XLOC_202304 | 253 coding  | noncoding | noncoding | noncoding |
| MSTRG.193418.1 |              | XLOC_202311 | 324 coding  | noncoding | noncoding | noncoding |
| XM_017024675.1 | MYH1         | XLOC_202319 | 6196 coding | coding    | coding    | coding    |
| MSTRG.193460.3 | MYH2         | XLOC_202320 | 315 coding  | noncoding | noncoding | noncoding |
| NM_001004313.2 | TMEM220      | XLOC_202325 | 3119 coding | coding    | coding    | coding    |
| MSTRG.193492.1 | SHISA6       | XLOC_202341 | 264 coding  | noncoding | noncoding | noncoding |
| MSTRG.193489.1 |              | XLOC_202352 | 316 coding  | noncoding | noncoding | noncoding |
| MSTRG.193722.1 | DNAH9        | XLOC_202359 | 270 coding  | noncoding | noncoding | noncoding |
| MSTRG.193557.1 |              | XLOC_202372 | 302 coding  | noncoding | noncoding | noncoding |
| MSTRG.193612.1 | MYOCD        | XLOC_202377 | 290 coding  | noncoding | noncoding | noncoding |
| MSTRG.193618.1 | MYOCD        | XLOC_202381 | 250 coding  | noncoding | noncoding | noncoding |
| MSTRG.193576.1 |              | XLOC_202395 | 314 coding  | noncoding | noncoding | noncoding |
| MSTRG.193584.1 |              | XLOC_202400 | 270 coding  | noncoding | noncoding | noncoding |
| MSTRG.193648.1 |              | XLOC_202439 | 304 coding  | noncoding | noncoding | noncoding |
| MSTRG.193658.1 |              | XLOC_202448 | 261 coding  | noncoding | noncoding | noncoding |
| MSTRG.193668.1 |              | XLOC_202457 | 303 coding  | noncoding | noncoding | noncoding |
| MSTRG.193673.1 | LINC02096    | XLOC_202459 | 236 coding  | noncoding | noncoding | noncoding |
| MSTRG.193695.1 |              | XLOC_202476 | 327 coding  | noncoding | noncoding | noncoding |
| MSTRG.193795.1 | TVP23C-CDRT4 | XLOC_202483 | 231 coding  | coding    | noncoding | noncoding |
| MSTRG.193801.1 | TVP23C-CDRT4 | XLOC_202486 | 283 coding  | noncoding | noncoding | noncoding |
| MSTRG.193708.1 | CDRT1        | XLOC_202489 | 264 coding  | noncoding | noncoding | noncoding |
| MSTRG.193920.1 |              | XLOC_202507 | 264 coding  | noncoding | noncoding | noncoding |
| MSTRG.193932.1 |              | XLOC_202511 | 268 coding  | noncoding | noncoding | noncoding |
| MSTRG.193977.1 | TNFRSF13B    | XLOC_202530 | 225 coding  | noncoding | noncoding | noncoding |
| MSTRG.193971.1 |              | XLOC_202531 | 229 coding  | noncoding | noncoding | noncoding |
| NM_001199125.1 | COPS3        | XLOC_202538 | 1816 coding | coding    | coding    | coding    |
| MSTRG.194011.1 | COPS3        | XLOC_202539 | 250 coding  | noncoding | noncoding | noncoding |
| MSTRG.194005.1 |              | XLOC_202544 | 349 coding  | noncoding | noncoding | noncoding |
| MSTRG.194044.1 |              | XLOC_202552 | 212 coding  | noncoding | noncoding | noncoding |
| MSTRG.194064.1 | RAI1         | XLOC_202563 | 338 coding  | noncoding | noncoding | noncoding |
| NR_024007.1    | SMCR5        | XLOC_202578 | 2844 coding | noncoding | coding    | noncoding |
| MSTRG.194142.1 | ATPAF2       | XLOC_202608 | 273 coding  | noncoding | noncoding | noncoding |
| MSTRG.194108.1 |              | XLOC_202612 | 259 coding  | noncoding | noncoding | noncoding |
| MSTRG.194151.2 | DRG2         | XLOC_202613 | 561 coding  | coding    | coding    | coding    |
| MSTRG.194153.1 | MYO15A       | XLOC_202614 | 219 coding  | noncoding | noncoding | noncoding |
| MSTRG.194131.1 |              | XLOC_202620 | 300 coding  | noncoding | noncoding | noncoding |
| MSTRG.194182.1 | CCDC144B     | XLOC_202638 | 364 coding  | noncoding | noncoding | noncoding |
| MSTRG.194217.1 | SLC5A10      | XLOC_202655 | 262 coding  | noncoding | noncoding | noncoding |
| NM_001321215.2 | B9D1         | XLOC_202673 | 3479 coding | coding    | coding    | coding    |

|                   |              |             |              |           |           |           |
|-------------------|--------------|-------------|--------------|-----------|-----------|-----------|
| MSTRG. 194275. 1  | RNF112       | XLOC_202682 | 265 coding   | noncoding | noncoding | noncoding |
| MSTRG. 194233. 1  |              | XLOC_202687 | 283 coding   | noncoding | noncoding | noncoding |
| MSTRG. 194242. 1  |              | XLOC_202688 | 487 coding   | noncoding | noncoding | noncoding |
| MSTRG. 194245. 1  | LOC112268205 | XLOC_202689 | 219 coding   | noncoding | noncoding | noncoding |
| MSTRG. 194276. 1  |              | XLOC_202697 | 231 coding   | noncoding | noncoding | noncoding |
| MSTRG. 194507. 7  | SPECC1       | XLOC_202713 | 2991 coding  | noncoding | coding    | noncoding |
| MSTRG. 194507. 11 | SPECC1       | XLOC_202713 | 3104 coding  | noncoding | coding    | noncoding |
| MSTRG. 194507. 14 | SPECC1       | XLOC_202713 | 4689 coding  | noncoding | coding    | coding    |
| MSTRG. 194559. 1  | LINC02088    | XLOC_202740 | 400 coding   | noncoding | noncoding | noncoding |
| MSTRG. 194313. 1  | LOC100287072 | XLOC_202745 | 256 coding   | noncoding | noncoding | noncoding |
| MSTRG. 194329. 1  | USP22        | XLOC_202758 | 262 coding   | noncoding | noncoding | noncoding |
| MSTRG. 194337. 1  |              | XLOC_202773 | 242 coding   | noncoding | noncoding | noncoding |
| MSTRG. 194407. 1  |              | XLOC_202798 | 291 coding   | noncoding | noncoding | noncoding |
| MSTRG. 194452. 1  |              | XLOC_202819 | 276 coding   | noncoding | noncoding | noncoding |
| MSTRG. 194473. 1  |              | XLOC_202826 | 234 coding   | noncoding | noncoding | noncoding |
| MSTRG. 194477. 1  |              | XLOC_202828 | 264 coding   | noncoding | noncoding | noncoding |
| MSTRG. 194479. 1  | LOC105371703 | XLOC_202830 | 261 coding   | coding    | noncoding | noncoding |
| MSTRG. 194484. 1  |              | XLOC_202833 | 250 coding   | noncoding | noncoding | noncoding |
| MSTRG. 194568. 1  |              | XLOC_202852 | 315 coding   | coding    | noncoding | noncoding |
| MSTRG. 194569. 1  |              | XLOC_202853 | 258 coding   | noncoding | noncoding | noncoding |
| NM_000625. 4      | NOS2         | XLOC_202855 | 4206 coding  | coding    | coding    | coding    |
| MSTRG. 194575. 1  | NOS2         | XLOC_202856 | 226 coding   | noncoding | noncoding | noncoding |
| XM_011524491. 3   | LYRM9        | XLOC_202859 | 4610 coding  | coding    | coding    | noncoding |
| MSTRG. 194589. 1  |              | XLOC_202862 | 270 coding   | noncoding | noncoding | noncoding |
| MSTRG. 194642. 5  | LOC105371709 | XLOC_202866 | 2923 coding  | coding    | coding    | noncoding |
| XR_001752821. 1   | LOC101926984 | XLOC_202873 | 8835 coding  | coding    | coding    | coding    |
| MSTRG. 194672. 1  | IFT20        | XLOC_202878 | 260 coding   | noncoding | noncoding | noncoding |
| MSTRG. 194611. 1  |              | XLOC_202887 | 312 coding   | noncoding | noncoding | noncoding |
| MSTRG. 194617. 1  |              | XLOC_202890 | 228 coding   | noncoding | noncoding | noncoding |
| MSTRG. 194628. 1  | FOXN1        | XLOC_202894 | 300 coding   | noncoding | noncoding | noncoding |
| MSTRG. 194631. 1  | FOXN1        | XLOC_202896 | 269 coding   | noncoding | noncoding | noncoding |
| MSTRG. 194754. 1  | SPAG5-AS1    | XLOC_202904 | 267 coding   | noncoding | noncoding | noncoding |
| MSTRG. 194761. 8  | SUPT6H       | XLOC_202908 | 256 coding   | noncoding | noncoding | noncoding |
| MSTRG. 194728. 1  | FAM222B      | XLOC_202922 | 285 coding   | noncoding | noncoding | noncoding |
| XM_005258016. 3   | PHF12        | XLOC_202931 | 3787 coding  | coding    | coding    | coding    |
| NM_020889. 3      | PHF12        | XLOC_202931 | 2985 coding  | coding    | coding    | coding    |
| MSTRG. 194735. 1  | PIPOX        | XLOC_202944 | 241 coding   | noncoding | noncoding | noncoding |
| MSTRG. 194789. 1  |              | XLOC_202960 | 345 coding   | noncoding | noncoding | noncoding |
| MSTRG. 194799. 1  |              | XLOC_202965 | 490 coding   | noncoding | noncoding | noncoding |
| MSTRG. 194808. 1  |              | XLOC_202966 | 235 coding   | noncoding | noncoding | noncoding |
| MSTRG. 194840. 3  | TAOK1        | XLOC_202968 | 10306 coding | coding    | noncoding | noncoding |
| MSTRG. 194852. 1  | GIT1         | XLOC_202972 | 290 coding   | noncoding | noncoding | noncoding |
| MSTRG. 194859. 1  |              | XLOC_203049 | 264 coding   | noncoding | noncoding | noncoding |

|                  |              |             |             |           |           |           |
|------------------|--------------|-------------|-------------|-----------|-----------|-----------|
| MSTRG. 195115. 1 | LOC105371723 | XLOC_203068 | 322 coding  | noncoding | noncoding | noncoding |
| MSTRG. 195157. 1 | LOC107984974 | XLOC_203088 | 286 coding  | noncoding | noncoding | noncoding |
| MSTRG. 195190. 1 |              | XLOC_203095 | 246 coding  | noncoding | noncoding | noncoding |
| MSTRG. 195098. 1 |              | XLOC_203117 | 265 coding  | noncoding | noncoding | noncoding |
| MSTRG. 195106. 1 | UTP6         | XLOC_203121 | 250 coding  | noncoding | noncoding | noncoding |
| MSTRG. 195161. 4 | SUZ12        | XLOC_203123 | 815 coding  | noncoding | noncoding | noncoding |
| MSTRG. 195370. 1 | MYO1D        | XLOC_203155 | 702 coding  | noncoding | noncoding | noncoding |
| MSTRG. 195331. 1 | ASIC2        | XLOC_203189 | 278 coding  | noncoding | noncoding | noncoding |
| MSTRG. 195334. 1 | ASIC2        | XLOC_203190 | 240 coding  | noncoding | noncoding | noncoding |
| XR_001752829. 1  | LOC107985035 | XLOC_203198 | 4793 coding | noncoding | coding    | noncoding |
| MSTRG. 195290. 1 | LOC105371742 | XLOC_203222 | 287 coding  | noncoding | noncoding | noncoding |
| MSTRG. 195471. 1 | CCT6B        | XLOC_203225 | 266 coding  | noncoding | noncoding | noncoding |
| MSTRG. 195494. 1 | NLE1         | XLOC_203230 | 207 coding  | noncoding | noncoding | noncoding |
| MSTRG. 195427. 1 |              | XLOC_203241 | 261 coding  | noncoding | noncoding | noncoding |
| MSTRG. 195495. 1 |              | XLOC_203283 | 275 coding  | noncoding | noncoding | noncoding |
| MSTRG. 195503. 1 | RASL10B      | XLOC_203286 | 292 coding  | noncoding | noncoding | noncoding |
| NM_139285. 3     | GAS2L2       | XLOC_203287 | 3014 coding | coding    | coding    | coding    |
| NR_027921. 3     | CCL15-CCL14  | XLOC_203296 | 1464 coding | coding    | coding    | noncoding |
| MSTRG. 195686. 1 | RPL23        | XLOC_203376 | 488 coding  | coding    | coding    | coding    |
| MSTRG. 195686. 2 | RPL23        | XLOC_203376 | 505 coding  | coding    | coding    | coding    |
| MSTRG. 195680. 1 | LRRC37A11P   | XLOC_203391 | 277 coding  | noncoding | noncoding | noncoding |
| MSTRG. 195708. 1 | PLXDC1       | XLOC_203394 | 287 coding  | noncoding | noncoding | noncoding |
| MSTRG. 195709. 1 | PLXDC1       | XLOC_203395 | 290 coding  | noncoding | noncoding | noncoding |
| MSTRG. 195725. 1 | FBXL20       | XLOC_203404 | 238 coding  | noncoding | noncoding | noncoding |
| XM_005257465. 3  | MED1         | XLOC_203411 | 8022 coding | coding    | coding    | coding    |
| MSTRG. 195762. 1 | PGAP3        | XLOC_203422 | 202 coding  | noncoding | noncoding | noncoding |
| MSTRG. 195764. 2 | ERBB2        | XLOC_203423 | 1476 coding | coding    | coding    | noncoding |
| MSTRG. 195788. 1 | IKZF3        | XLOC_203434 | 320 coding  | noncoding | noncoding | noncoding |
| MSTRG. 195810. 1 |              | XLOC_203462 | 234 coding  | noncoding | noncoding | noncoding |
| MSTRG. 195842. 1 | TOP2A        | XLOC_203474 | 280 coding  | noncoding | noncoding | noncoding |
| MSTRG. 195863. 1 |              | XLOC_203492 | 277 coding  | noncoding | noncoding | noncoding |
| MSTRG. 195865. 1 |              | XLOC_203493 | 238 coding  | noncoding | noncoding | noncoding |
| XM_005257200. 5  | KRT23        | XLOC_203516 | 1430 coding | coding    | coding    | coding    |
| XM_017024189. 2  | KRT40        | XLOC_203519 | 3699 coding | coding    | coding    | coding    |
| MSTRG. 195907. 1 | KRTAP4-1     | XLOC_203544 | 685 coding  | noncoding | noncoding | noncoding |
| NM_001358661. 2  | C17orf113    | XLOC_203592 | 3733 coding | noncoding | coding    | coding    |
| MSTRG. 196024. 1 | STAT3        | XLOC_203609 | 377 coding  | noncoding | noncoding | noncoding |
| MSTRG. 196027. 1 | STAT3        | XLOC_203612 | 309 coding  | noncoding | noncoding | noncoding |
| MSTRG. 195988. 1 |              | XLOC_203614 | 227 coding  | noncoding | noncoding | noncoding |
| MSTRG. 195993. 1 | CAVIN1       | XLOC_203616 | 255 coding  | noncoding | noncoding | noncoding |
| MSTRG. 196010. 1 |              | XLOC_203625 | 440 coding  | noncoding | noncoding | noncoding |
| MSTRG. 196058. 1 | WNK4         | XLOC_203639 | 238 coding  | noncoding | noncoding | noncoding |
| MSTRG. 196062. 1 | BECN1        | XLOC_203642 | 259 coding  | noncoding | noncoding | noncoding |

|                  |                |             |             |           |           |           |
|------------------|----------------|-------------|-------------|-----------|-----------|-----------|
| MSTRG. 196065. 4 | PSME3          | XLOC_203644 | 1784 coding | coding    | noncoding | noncoding |
| MSTRG. 196056. 1 |                | XLOC_203652 | 320 coding  | noncoding | noncoding | noncoding |
| MSTRG. 196085. 1 | PTGES3L-AARSD1 | XLOC_203655 | 535 coding  | noncoding | noncoding | noncoding |
| MSTRG. 196152. 1 | BRCA1          | XLOC_203662 | 246 coding  | noncoding | noncoding | noncoding |
| MSTRG. 196108. 1 |                | XLOC_203685 | 693 coding  | noncoding | noncoding | noncoding |
| MSTRG. 196131. 1 |                | XLOC_203687 | 281 coding  | noncoding | noncoding | noncoding |
| MSTRG. 196146. 1 | LINC02594      | XLOC_203694 | 421 coding  | noncoding | noncoding | noncoding |
| MSTRG. 196215. 1 | LSM12          | XLOC_203713 | 261 coding  | noncoding | noncoding | noncoding |
| MSTRG. 196216. 1 | LSM12          | XLOC_203714 | 212 coding  | noncoding | noncoding | noncoding |
| MSTRG. 196230. 1 | HDAC5          | XLOC_203718 | 303 coding  | noncoding | noncoding | noncoding |
| MSTRG. 196264. 1 |                | XLOC_203731 | 275 coding  | noncoding | noncoding | noncoding |
| MSTRG. 196235. 1 |                | XLOC_203734 | 319 coding  | noncoding | noncoding | noncoding |
| XM_011524883. 3  | SLC25A39       | XLOC_203738 | 1538 coding | coding    | coding    | coding    |
| XM_011524884. 1  | SLC25A39       | XLOC_203738 | 1530 coding | coding    | coding    | coding    |
| NM_001366726. 1  | SLC25A39       | XLOC_203738 | 1489 coding | coding    | coding    | coding    |
| MSTRG. 196270. 1 |                | XLOC_203754 | 202 coding  | noncoding | noncoding | noncoding |
| MSTRG. 196278. 1 |                | XLOC_203757 | 217 coding  | noncoding | noncoding | noncoding |
| MSTRG. 196276. 1 |                | XLOC_203763 | 326 coding  | noncoding | noncoding | noncoding |
| MSTRG. 196296. 1 |                | XLOC_203770 | 260 coding  | noncoding | noncoding | noncoding |
| MSTRG. 196313. 1 | LOC107987243   | XLOC_203780 | 232 coding  | noncoding | noncoding | noncoding |
| MSTRG. 196326. 1 | DCAKD          | XLOC_203785 | 258 coding  | noncoding | noncoding | noncoding |
| MSTRG. 196376. 3 | LOC107985040   | XLOC_203794 | 4199 coding | coding    | coding    | coding    |
| MSTRG. 196389. 1 | MAP3K14        | XLOC_203801 | 238 coding  | noncoding | noncoding | noncoding |
| MSTRG. 196472. 1 | ARL17B         | XLOC_203822 | 290 coding  | noncoding | noncoding | noncoding |
| MSTRG. 196513. 1 | LOC101927060   | XLOC_203845 | 268 coding  | noncoding | noncoding | noncoding |
| NM_001353047. 2  | CDC27          | XLOC_203846 | 5763 coding | coding    | noncoding | coding    |
| XM_011525549. 2  | CDC27          | XLOC_203846 | 5622 coding | coding    | coding    | coding    |
| XM_017025488. 1  | CDC27          | XLOC_203846 | 5573 coding | coding    | coding    | coding    |
| XM_017025486. 1  | CDC27          | XLOC_203846 | 5266 coding | coding    | coding    | coding    |
| MSTRG. 196414. 3 | ITGB3          | XLOC_203850 | 2893 coding | coding    | coding    | noncoding |
| MSTRG. 196414. 4 | ITGB3          | XLOC_203850 | 5541 coding | coding    | coding    | noncoding |
| MSTRG. 196441. 1 | MRPL45P2       | XLOC_203869 | 214 coding  | noncoding | noncoding | noncoding |
| MSTRG. 196442. 1 | MRPL45P2       | XLOC_203870 | 264 coding  | noncoding | noncoding | noncoding |
| MSTRG. 196413. 1 |                | XLOC_203883 | 319 coding  | noncoding | noncoding | noncoding |
| NM_001258248. 2  | SP6            | XLOC_203891 | 3824 coding | coding    | coding    | coding    |
| MSTRG. 196554. 6 | NFE2L1         | XLOC_203902 | 1144 coding | noncoding | coding    | noncoding |
| MSTRG. 196711. 1 | SKAP1          | XLOC_203928 | 226 coding  | noncoding | noncoding | noncoding |
| NM_002144. 4     | HOXB1          | XLOC_203993 | 2034 coding | coding    | coding    | coding    |
| MSTRG. 196599. 1 | TTLL6          | XLOC_204020 | 308 coding  | noncoding | noncoding | noncoding |
| MSTRG. 196631. 3 | UBE2Z          | XLOC_204029 | 2695 coding | coding    | coding    | noncoding |
| MSTRG. 196611. 1 |                | XLOC_204032 | 294 coding  | noncoding | noncoding | noncoding |
| MSTRG. 196648. 1 |                | XLOC_204049 | 249 coding  | noncoding | noncoding | noncoding |
| MSTRG. 196669. 1 | LOC100288866   | XLOC_204054 | 271 coding  | coding    | noncoding | noncoding |

|                |              |             |             |           |           |           |
|----------------|--------------|-------------|-------------|-----------|-----------|-----------|
| NM_001007229.1 | SPOP         | XLOC_204055 | 2967 coding | coding    | coding    | coding    |
| MSTRG.196802.1 | FAM117A      | XLOC_204069 | 256 coding  | noncoding | noncoding | noncoding |
| MSTRG.196782.1 |              | XLOC_204086 | 261 coding  | noncoding | noncoding | noncoding |
| NR_038230.1    | PICART1      | XLOC_204092 | 2533 coding | noncoding | noncoding | noncoding |
| XR_001752932.1 | LOC105371818 | XLOC_204102 | 3224 coding | noncoding | coding    | noncoding |
| NM_000088.3    | COL1A1       | XLOC_204105 | 5927 coding | coding    | coding    | coding    |
| MSTRG.196830.1 | LOC105371819 | XLOC_204109 | 427 coding  | noncoding | noncoding | noncoding |
| NM_018509.4    | LRRC59       | XLOC_204117 | 2880 coding | coding    | coding    | coding    |
| MSTRG.196853.1 |              | XLOC_204119 | 240 coding  | noncoding | noncoding | noncoding |
| MSTRG.196883.1 | CACNA1G      | XLOC_204130 | 301 coding  | noncoding | noncoding | noncoding |
| XM_017025296.1 | ANKRD40      | XLOC_204134 | 3911 coding | noncoding | coding    | coding    |
| MSTRG.196892.1 |              | XLOC_204138 | 460 coding  | noncoding | noncoding | noncoding |
| MSTRG.196895.1 |              | XLOC_204140 | 294 coding  | noncoding | noncoding | noncoding |
| MSTRG.196898.1 | WFIKKN2      | XLOC_204142 | 267 coding  | coding    | coding    | noncoding |
| MSTRG.196907.1 |              | XLOC_204148 | 252 coding  | noncoding | noncoding | noncoding |
| MSTRG.196948.1 | SPAG9        | XLOC_204169 | 255 coding  | noncoding | noncoding | noncoding |
| MSTRG.196950.1 | SPAG9        | XLOC_204171 | 242 coding  | noncoding | noncoding | noncoding |
| MSTRG.196962.1 |              | XLOC_204190 | 270 coding  | coding    | noncoding | noncoding |
| MSTRG.196990.1 | CA10         | XLOC_204204 | 280 coding  | noncoding | noncoding | noncoding |
| MSTRG.197036.1 |              | XLOC_204226 | 268 coding  | noncoding | noncoding | noncoding |
| MSTRG.197041.1 |              | XLOC_204229 | 264 coding  | noncoding | noncoding | noncoding |
| MSTRG.197050.1 |              | XLOC_204231 | 267 coding  | noncoding | noncoding | noncoding |
| MSTRG.197051.1 |              | XLOC_204232 | 233 coding  | noncoding | noncoding | noncoding |
| MSTRG.197077.1 |              | XLOC_204243 | 720 coding  | coding    | noncoding | noncoding |
| MSTRG.197084.1 |              | XLOC_204246 | 366 coding  | noncoding | noncoding | noncoding |
| MSTRG.197177.1 | TOM1L1       | XLOC_204249 | 320 coding  | noncoding | noncoding | noncoding |
| MSTRG.197093.1 |              | XLOC_204289 | 241 coding  | noncoding | noncoding | noncoding |
| MSTRG.197118.1 |              | XLOC_204305 | 214 coding  | noncoding | noncoding | noncoding |
| MSTRG.197141.1 |              | XLOC_204331 | 261 coding  | noncoding | noncoding | noncoding |
| MSTRG.197145.1 |              | XLOC_204332 | 281 coding  | noncoding | noncoding | noncoding |
| MSTRG.197229.1 | ANKFN1       | XLOC_204336 | 229 coding  | noncoding | noncoding | noncoding |
| MSTRG.197232.1 | ANKFN1       | XLOC_204338 | 247 coding  | noncoding | noncoding | noncoding |
| NM_004645.3    | COIL         | XLOC_204358 | 2634 coding | coding    | coding    | coding    |
| MSTRG.197294.1 |              | XLOC_204365 | 362 coding  | noncoding | noncoding | noncoding |
| XR_001752946.1 | LOC101927510 | XLOC_204368 | 3667 coding | noncoding | coding    | noncoding |
| MSTRG.197393.5 | MSI2         | XLOC_204369 | 507 coding  | coding    | noncoding | noncoding |
| MSTRG.197332.1 |              | XLOC_204407 | 291 coding  | noncoding | noncoding | noncoding |
| MSTRG.197338.1 |              | XLOC_204414 | 239 coding  | noncoding | noncoding | noncoding |
| MSTRG.197382.1 | MPO          | XLOC_204423 | 231 coding  | noncoding | noncoding | noncoding |
| XM_005257784.2 | MTMR4        | XLOC_204436 | 5977 coding | coding    | coding    | coding    |
| MSTRG.197496.1 | SEPTIN4-AS1  | XLOC_204439 | 260 coding  | noncoding | noncoding | noncoding |
| XM_011525029.3 | TEX14        | XLOC_204441 | 5030 coding | coding    | coding    | coding    |
| MSTRG.197501.1 | LOC107985048 | XLOC_204442 | 292 coding  | noncoding | noncoding | noncoding |

|                   |              |                    |             |           |           |           |
|-------------------|--------------|--------------------|-------------|-----------|-----------|-----------|
| MSTRG. 197519. 1  | PPM1E        | XLOC_204448        | 254 coding  | noncoding | noncoding | noncoding |
| NM_001005207. 5   | TRIM37       | XLOC_204449        | 3583 coding | coding    | coding    | coding    |
| MSTRG. 197525. 1  | PPM1E        | XLOC_204450        | 281 coding  | noncoding | noncoding | noncoding |
| MSTRG. 197530. 1  | TRIM37       | XLOC_204453        | 291 coding  | noncoding | noncoding | noncoding |
| MSTRG. 197533. 1  | TRIM37       | XLOC_204456        | 442 coding  | noncoding | noncoding | noncoding |
| MSTRG. 197468. 1  |              | XLOC_204470        | 257 coding  | noncoding | noncoding | noncoding |
| MSTRG. 197471. 1  | LINC01476    | XLOC_204471        | 284 coding  | noncoding | noncoding | noncoding |
| MSTRG. 197486. 1  | LINC01476    | XLOC_204475        | 225 coding  | noncoding | noncoding | noncoding |
| MSTRG. 197747. 7  | PTRH2        | XLOC_204478        | 9280 coding | coding    | coding    | noncoding |
| MSTRG. 197747. 16 | VMP1         | XLOC_204478        | 6103 coding | noncoding | coding    | noncoding |
| MSTRG. 197794. 2  | CA4          | XLOC_204502        | 467 coding  | coding    | noncoding | noncoding |
| MSTRG. 197795. 12 | USP32        | XLOC_204503        | 1844 coding | coding    | coding    | coding    |
| MSTRG. 197543. 1  | APPBP2       | XLOC_204532        | 282 coding  | noncoding | noncoding | noncoding |
| MSTRG. 197540. 1  | LINC01999    | XLOC_204538        | 202 coding  | noncoding | noncoding | noncoding |
| MSTRG. 197550. 2  | PPM1D        | XLOC_204539        | 1479 coding | coding    | noncoding | noncoding |
| MSTRG. 197566. 1  |              | XLOC_204553        | 273 coding  | noncoding | noncoding | noncoding |
| MSTRG. 197567. 1  |              | XLOC_204554        | 330 coding  | noncoding | noncoding | noncoding |
| MSTRG. 197575. 1  | BRIP1        | XLOC_204560        | 284 coding  | noncoding | noncoding | noncoding |
| MSTRG. 197601. 1  | MED13        | XLOC_204568        | 297 coding  | noncoding | noncoding | noncoding |
| MSTRG. 197606. 1  | MED13        | XLOC_204572        | 304 coding  | noncoding | noncoding | noncoding |
| MSTRG. 197582. 1  |              | XLOC_204577        | 224 coding  | noncoding | noncoding | noncoding |
| MSTRG. 197583. 1  |              | XLOC_204578        | 289 coding  | noncoding | noncoding | noncoding |
| MSTRG. 197594. 1  | EFCAB3       | XLOC_204584        | 261 coding  | noncoding | noncoding | noncoding |
| MSTRG. 197644. 1  | TLK2         | XLOC_204591        | 310 coding  | noncoding | noncoding | noncoding |
| XR_934406. 3      |              | 10-Mar XLOC_204602 | 3811 coding | coding    | coding    | coding    |
| MSTRG. 197640. 1  |              | 10-Mar XLOC_204605 | 218 coding  | noncoding | noncoding | noncoding |
| MSTRG. 197624. 1  | LOC101927877 | XLOC_204606        | 384 coding  | noncoding | noncoding | noncoding |
| MSTRG. 197657. 1  |              | XLOC_204620        | 270 coding  | noncoding | noncoding | noncoding |
| MSTRG. 197665. 1  | ACE          | XLOC_204621        | 266 coding  | coding    | noncoding | noncoding |
| MSTRG. 197838. 1  | STRADA       | XLOC_204636        | 287 coding  | noncoding | noncoding | noncoding |
| MSTRG. 197894. 13 | FTSJ3        | XLOC_204638        | 1306 coding | coding    | coding    | coding    |
| NM_000442. 5      | PECAM1       | XLOC_204668        | 6813 coding | coding    | coding    | coding    |
| MSTRG. 197921. 2  | PECAM1       | XLOC_204668        | 6764 coding | coding    | coding    | coding    |
| MSTRG. 197968. 1  | PLEKHM1P1    | XLOC_204699        | 236 coding  | noncoding | noncoding | noncoding |
| MSTRG. 197947. 1  |              | XLOC_204711        | 258 coding  | noncoding | noncoding | noncoding |
| MSTRG. 197980. 1  |              | XLOC_204721        | 278 coding  | noncoding | noncoding | noncoding |
| XM_011525320. 1   | AXIN2        | XLOC_204729        | 4434 coding | coding    | coding    | coding    |
| MSTRG. 198029. 1  | AXIN2        | XLOC_204730        | 270 coding  | noncoding | noncoding | noncoding |
| MSTRG. 198055. 1  | CEP112       | XLOC_204738        | 269 coding  | noncoding | noncoding | noncoding |
| MSTRG. 198060. 1  | CEP112       | XLOC_204741        | 301 coding  | noncoding | noncoding | noncoding |
| MSTRG. 198077. 1  | CEP112       | XLOC_204750        | 248 coding  | noncoding | noncoding | noncoding |
| MSTRG. 198083. 1  | CEP112       | XLOC_204753        | 289 coding  | coding    | noncoding | noncoding |
| XR_001752712. 2   | HELZ         | XLOC_204767        | 3770 coding | coding    | coding    | coding    |

|                |              |             |              |           |           |           |
|----------------|--------------|-------------|--------------|-----------|-----------|-----------|
| MSTRG.198108.1 | HELZ         | XLOC_204768 | 295 coding   | noncoding | noncoding | noncoding |
| MSTRG.198094.1 |              | XLOC_204784 | 217 coding   | noncoding | noncoding | noncoding |
| MSTRG.198097.1 |              | XLOC_204785 | 238 coding   | noncoding | noncoding | noncoding |
| MSTRG.198099.1 |              | XLOC_204786 | 282 coding   | noncoding | noncoding | noncoding |
| MSTRG.198176.1 |              | XLOC_204787 | 346 coding   | noncoding | noncoding | noncoding |
| MSTRG.198126.1 |              | XLOC_204798 | 394 coding   | noncoding | noncoding | noncoding |
| MSTRG.198127.1 |              | XLOC_204799 | 321 coding   | noncoding | noncoding | noncoding |
| MSTRG.198232.9 | BPTF         | XLOC_204800 | 9543 coding  | coding    | coding    | noncoding |
| MSTRG.198222.1 | LOC105371874 | XLOC_204821 | 307 coding   | noncoding | noncoding | noncoding |
| MSTRG.198392.1 | LINC01483    | XLOC_204856 | 289 coding   | noncoding | noncoding | noncoding |
| MSTRG.198359.1 | KCNJ16       | XLOC_204878 | 310 coding   | coding    | noncoding | noncoding |
| MSTRG.198360.1 |              | XLOC_204888 | 275 coding   | noncoding | noncoding | noncoding |
| MSTRG.198361.1 |              | XLOC_204889 | 287 coding   | noncoding | noncoding | noncoding |
| MSTRG.198420.1 |              | XLOC_204892 | 301 coding   | noncoding | noncoding | noncoding |
| MSTRG.198421.1 |              | XLOC_204893 | 350 coding   | noncoding | noncoding | noncoding |
| MSTRG.198436.1 |              | XLOC_204899 | 302 coding   | noncoding | noncoding | noncoding |
| MSTRG.198451.1 |              | XLOC_204906 | 264 coding   | noncoding | noncoding | noncoding |
| MSTRG.198474.1 |              | XLOC_204920 | 241 coding   | noncoding | noncoding | noncoding |
| NR_103737.1    | SOX9-AS1     | XLOC_204923 | 1739 coding  | noncoding | noncoding | noncoding |
| MSTRG.198514.1 |              | XLOC_204954 | 229 coding   | noncoding | noncoding | noncoding |
| MSTRG.198523.1 | CDC42EP4     | XLOC_204961 | 254 coding   | noncoding | noncoding | noncoding |
| MSTRG.198536.1 | SDK2         | XLOC_204963 | 219 coding   | noncoding | noncoding | noncoding |
| MSTRG.198557.1 | SDK2         | XLOC_204970 | 299 coding   | noncoding | noncoding | noncoding |
| MSTRG.198529.1 |              | XLOC_204971 | 269 coding   | noncoding | noncoding | noncoding |
| MSTRG.198568.1 | LINC00469    | XLOC_204976 | 308 coding   | noncoding | noncoding | noncoding |
| MSTRG.198586.1 |              | XLOC_204985 | 221 coding   | noncoding | noncoding | noncoding |
| MSTRG.198601.1 |              | XLOC_204991 | 309 coding   | noncoding | noncoding | noncoding |
| MSTRG.198657.1 |              | XLOC_204997 | 263 coding   | noncoding | noncoding | noncoding |
| XM_011525569.2 | CD300H       | XLOC_205009 | 1159 coding  | coding    | coding    | coding    |
| MSTRG.198719.1 | RAB37        | XLOC_205018 | 273 coding   | noncoding | noncoding | noncoding |
| MSTRG.198721.1 | RAB37        | XLOC_205020 | 286 coding   | noncoding | noncoding | noncoding |
| MSTRG.198722.1 | RAB37        | XLOC_205021 | 245 coding   | noncoding | noncoding | noncoding |
| MSTRG.198724.1 | RAB37        | XLOC_205022 | 252 coding   | noncoding | noncoding | noncoding |
| NM_173477.5    | USH1G        | XLOC_205033 | 3558 coding  | coding    | coding    | coding    |
| MSTRG.198709.1 | KCTD2        | XLOC_205041 | 365 coding   | noncoding | noncoding | noncoding |
| MSTRG.198739.4 | SLC16A5      | XLOC_205043 | 556 coding   | coding    | coding    | noncoding |
| MSTRG.198746.1 |              | XLOC_205054 | 348 coding   | noncoding | noncoding | noncoding |
| MSTRG.198752.1 |              | XLOC_205067 | 272 coding   | noncoding | noncoding | noncoding |
| NM_020753.5    | CASKIN2      | XLOC_205077 | 4969 coding  | coding    | coding    | coding    |
| MSTRG.198831.1 | MYO15B       | XLOC_205083 | 757 coding   | noncoding | coding    | noncoding |
| MSTRG.198834.1 | RECQL5       | XLOC_205086 | 10058 coding | coding    | coding    | coding    |
| MSTRG.198850.1 | ACOX1        | XLOC_205107 | 249 coding   | noncoding | noncoding | noncoding |
| MSTRG.198870.1 | RNF157       | XLOC_205121 | 266 coding   | noncoding | noncoding | noncoding |

|                   |              |             |              |           |           |           |
|-------------------|--------------|-------------|--------------|-----------|-----------|-----------|
| MSTRG. 198871. 2  | UBALD2       | XLOC_205124 | 1287 coding  | coding    | coding    | noncoding |
| MSTRG. 198887. 1  | PRPSAP1      | XLOC_205126 | 314 coding   | noncoding | noncoding | noncoding |
| MSTRG. 198884. 1  |              | XLOC_205129 | 255 coding   | noncoding | noncoding | noncoding |
| MSTRG. 198963. 1  | JMJD6        | XLOC_205154 | 238 coding   | noncoding | noncoding | noncoding |
| MSTRG. 198944. 1  |              | XLOC_205163 | 336 coding   | noncoding | noncoding | noncoding |
| MSTRG. 198958. 1  | MGAT5B       | XLOC_205166 | 337 coding   | noncoding | noncoding | noncoding |
| MSTRG. 198947. 1  |              | XLOC_205169 | 306 coding   | noncoding | noncoding | noncoding |
| MSTRG. 198951. 1  |              | XLOC_205172 | 306 coding   | noncoding | noncoding | noncoding |
| MSTRG. 198953. 1  |              | XLOC_205173 | 291 coding   | noncoding | noncoding | noncoding |
| MSTRG. 199026. 25 | SEC14L1      | XLOC_205186 | 4750 coding  | coding    | coding    | coding    |
| MSTRG. 198972. 1  |              | XLOC_205189 | 229 coding   | noncoding | noncoding | noncoding |
| XR_934990. 2      | LOC105371903 | XLOC_205204 | 2879 coding  | noncoding | coding    | noncoding |
| NR_040071. 1      | TNRC6C-AS1   | XLOC_205229 | 3189 coding  | noncoding | coding    | noncoding |
| MSTRG. 199119. 20 | TMC6         | XLOC_205229 | 4494 coding  | coding    | coding    | coding    |
| MSTRG. 199093. 1  | AFMID        | XLOC_205235 | 211 coding   | noncoding | noncoding | noncoding |
| MSTRG. 199076. 1  | BIRC5        | XLOC_205239 | 930 coding   | noncoding | noncoding | noncoding |
| MSTRG. 199083. 1  |              | XLOC_205242 | 241 coding   | noncoding | noncoding | noncoding |
| MSTRG. 199133. 2  | DNAH17       | XLOC_205246 | 14929 coding | coding    | noncoding | coding    |
| MSTRG. 199098. 1  |              | XLOC_205250 | 277 coding   | noncoding | noncoding | noncoding |
| XR_001752573. 2   | USP36        | XLOC_205276 | 5530 coding  | coding    | coding    | coding    |
| MSTRG. 199273. 1  | TIMP2        | XLOC_205282 | 287 coding   | noncoding | noncoding | noncoding |
| MSTRG. 199276. 1  | TIMP2        | XLOC_205285 | 204 coding   | noncoding | noncoding | noncoding |
| MSTRG. 199163. 1  | ENGASE       | XLOC_205296 | 1051 coding  | noncoding | coding    | coding    |
| MSTRG. 199187. 1  | RBFOX3       | XLOC_205302 | 252 coding   | noncoding | noncoding | noncoding |
| MSTRG. 199192. 1  | RBFOX3       | XLOC_205305 | 258 coding   | noncoding | noncoding | noncoding |
| MSTRG. 199198. 1  | RBFOX3       | XLOC_205308 | 220 coding   | noncoding | noncoding | noncoding |
| MSTRG. 199206. 1  | RBFOX3       | XLOC_205311 | 277 coding   | noncoding | noncoding | noncoding |
| XM_024450576. 1   | TBC1D16      | XLOC_205325 | 11134 coding | coding    | coding    | coding    |
| MSTRG. 199225. 1  | TBC1D16      | XLOC_205326 | 311 coding   | noncoding | noncoding | noncoding |
| MSTRG. 199228. 1  | TBC1D16      | XLOC_205327 | 263 coding   | noncoding | noncoding | noncoding |
| MSTRG. 199282. 1  | CCDC40       | XLOC_205328 | 323 coding   | noncoding | noncoding | noncoding |
| MSTRG. 199290. 1  | CARD14       | XLOC_205333 | 282 coding   | noncoding | noncoding | noncoding |
| MSTRG. 199295. 1  | SLC26A11     | XLOC_205337 | 242 coding   | noncoding | noncoding | noncoding |
| MSTRG. 199330. 13 | LOC100294362 | XLOC_205342 | 20095 coding | coding    | coding    | coding    |
| NR_026857. 1      | BAIAP2-DT    | XLOC_205366 | 4421 coding  | noncoding | noncoding | coding    |
| NR_038080. 1      | LINC00482    | XLOC_205390 | 2970 coding  | noncoding | coding    | coding    |
| MSTRG. 199407. 1  | FSCN2        | XLOC_205406 | 256 coding   | noncoding | noncoding | noncoding |
| MSTRG. 199480. 2  | HGS          | XLOC_205422 | 2857 coding  | coding    | coding    | noncoding |
| XM_011523538. 2   | FASN         | XLOC_205455 | 8526 coding  | coding    | noncoding | coding    |
| XM_017024464. 2   | CCDC57       | XLOC_205457 | 4548 coding  | noncoding | coding    | coding    |
| MSTRG. 199544. 1  | CCDC57       | XLOC_205461 | 307 coding   | noncoding | noncoding | noncoding |
| NR_135639. 1      | LINC01970    | XLOC_205463 | 1810 coding  | noncoding | coding    | noncoding |
| MSTRG. 199609. 1  | RAB40B       | XLOC_205484 | 271 coding   | noncoding | noncoding | noncoding |

|                   |              |             |             |           |           |           |
|-------------------|--------------|-------------|-------------|-----------|-----------|-----------|
| MSTRG. 199639. 1  |              | XLOC_205514 | 234 coding  | noncoding | noncoding | noncoding |
| MSTRG. 199663. 1  | COLEC12      | XLOC_205520 | 267 coding  | noncoding | noncoding | noncoding |
| MSTRG. 199653. 1  |              | XLOC_205528 | 312 coding  | noncoding | noncoding | noncoding |
| MSTRG. 199748. 1  |              | XLOC_205562 | 252 coding  | noncoding | noncoding | noncoding |
| MSTRG. 199762. 1  | LOC105371956 | XLOC_205570 | 396 coding  | noncoding | noncoding | noncoding |
| MSTRG. 199818. 1  |              | XLOC_205609 | 215 coding  | noncoding | noncoding | noncoding |
| MSTRG. 199874. 1  | MYOM1        | XLOC_205611 | 252 coding  | noncoding | noncoding | noncoding |
| NM_001303047. 1   | MYL12A       | XLOC_205624 | 1313 coding | coding    | coding    | coding    |
| NM_173211. 1      | TGIF1        | XLOC_205635 | 1357 coding | coding    | coding    | coding    |
| MSTRG. 199964. 1  | DLGAP1       | XLOC_205646 | 275 coding  | noncoding | noncoding | noncoding |
| MSTRG. 199967. 1  | DLGAP1       | XLOC_205648 | 266 coding  | noncoding | noncoding | noncoding |
| MSTRG. 200062. 1  |              | XLOC_205788 | 279 coding  | noncoding | noncoding | noncoding |
| NM_001366230. 1   | ARHGAP28     | XLOC_205791 | 5858 coding | coding    | coding    | coding    |
| MSTRG. 200082. 1  | ARHGAP28     | XLOC_205793 | 301 coding  | noncoding | noncoding | noncoding |
| MSTRG. 200073. 1  |              | XLOC_205800 | 287 coding  | noncoding | noncoding | noncoding |
| MSTRG. 200075. 1  |              | XLOC_205801 | 268 coding  | coding    | noncoding | noncoding |
| MSTRG. 200114. 1  |              | XLOC_205810 | 317 coding  | coding    | noncoding | noncoding |
| MSTRG. 200116. 1  |              | XLOC_205811 | 310 coding  | noncoding | noncoding | noncoding |
| MSTRG. 200343. 1  | PTPRM        | XLOC_205830 | 248 coding  | noncoding | noncoding | noncoding |
| XM_017025674. 2   | MTCL1        | XLOC_205845 | 6304 coding | coding    | coding    | coding    |
| MSTRG. 200219. 1  |              | XLOC_205850 | 273 coding  | noncoding | noncoding | noncoding |
| XM_017025670. 2   | ANKRD12      | XLOC_205867 | 8027 coding | coding    | coding    | coding    |
| MSTRG. 200375. 1  | ANKRD12      | XLOC_205877 | 407 coding  | noncoding | noncoding | noncoding |
| MSTRG. 200305. 3  | PPP4R1       | XLOC_205893 | 4593 coding | coding    | noncoding | noncoding |
| MSTRG. 200305. 7  | PPP4R1       | XLOC_205893 | 3735 coding | coding    | noncoding | noncoding |
| MSTRG. 200305. 10 | PPP4R1       | XLOC_205893 | 3245 coding | coding    | coding    | noncoding |
| XM_017025529. 2   | RAB31        | XLOC_205901 | 4143 coding | coding    | coding    | coding    |
| MSTRG. 200266. 1  |              | XLOC_205922 | 246 coding  | noncoding | noncoding | noncoding |
| MSTRG. 200414. 1  |              | XLOC_205949 | 285 coding  | noncoding | noncoding | noncoding |
| MSTRG. 200424. 1  |              | XLOC_205956 | 398 coding  | noncoding | noncoding | noncoding |
| MSTRG. 200480. 1  | PIEZO2       | XLOC_205970 | 313 coding  | noncoding | noncoding | noncoding |
| MSTRG. 200484. 1  | PIEZO2       | XLOC_205971 | 209 coding  | noncoding | noncoding | noncoding |
| MSTRG. 200488. 1  | PIEZO2       | XLOC_205973 | 200 coding  | noncoding | noncoding | noncoding |
| MSTRG. 200490. 1  | PIEZO2       | XLOC_205974 | 259 coding  | noncoding | noncoding | noncoding |
| MSTRG. 200459. 1  |              | XLOC_205985 | 238 coding  | coding    | noncoding | noncoding |
| MSTRG. 200533. 1  | GNAL         | XLOC_205991 | 289 coding  | noncoding | noncoding | noncoding |
| MSTRG. 200503. 1  | IMPA2        | XLOC_206003 | 380 coding  | noncoding | noncoding | noncoding |
| MSTRG. 200506. 1  |              | XLOC_206006 | 302 coding  | noncoding | noncoding | noncoding |
| MSTRG. 200519. 1  | ANKRD62      | XLOC_206009 | 286 coding  | noncoding | noncoding | noncoding |
| NM_001303525. 1   | TUBB6        | XLOC_206019 | 1192 coding | coding    | coding    | coding    |
| MSTRG. 200578. 1  | SPIRE1       | XLOC_206023 | 245 coding  | noncoding | noncoding | noncoding |
| MSTRG. 200581. 1  | SPIRE1       | XLOC_206025 | 229 coding  | noncoding | noncoding | noncoding |
| MSTRG. 200585. 1  | SPIRE1       | XLOC_206028 | 272 coding  | noncoding | noncoding | noncoding |

|                   |              |             |             |           |           |           |
|-------------------|--------------|-------------|-------------|-----------|-----------|-----------|
| MSTRG. 200597. 1  | SPIRE1       | XLOC_206037 | 270 coding  | noncoding | noncoding | noncoding |
| MSTRG. 200603. 1  | CEP76        | XLOC_206042 | 314 coding  | noncoding | noncoding | noncoding |
| MSTRG. 200555. 1  |              | XLOC_206049 | 284 coding  | noncoding | noncoding | noncoding |
| MSTRG. 200632. 17 | CEP192       | XLOC_206068 | 1976 coding | noncoding | coding    | coding    |
| MSTRG. 200628. 1  |              | XLOC_206080 | 327 coding  | noncoding | noncoding | noncoding |
| NM_001267251. 1   | LDLRAD4      | XLOC_206081 | 8682 coding | noncoding | coding    | coding    |
| MSTRG. 200947. 1  | LDLRAD4      | XLOC_206102 | 240 coding  | noncoding | noncoding | noncoding |
| MSTRG. 200952. 1  | LDLRAD4      | XLOC_206107 | 266 coding  | noncoding | noncoding | noncoding |
| MSTRG. 200656. 1  |              | XLOC_206144 | 280 coding  | noncoding | noncoding | noncoding |
| MSTRG. 200742. 1  |              | XLOC_206172 | 293 coding  | coding    | noncoding | noncoding |
| NR_026756. 1      | CYP4F35P     | XLOC_206177 | 2876 coding | noncoding | coding    | noncoding |
| MSTRG. 200768. 1  |              | XLOC_206180 | 214 coding  | noncoding | noncoding | noncoding |
| NM_001367607. 1   | ANKRD30B     | XLOC_206185 | 4927 coding | coding    | coding    | coding    |
| MSTRG. 200784. 1  |              | XLOC_206190 | 282 coding  | noncoding | noncoding | noncoding |
| MSTRG. 200800. 1  |              | XLOC_206195 | 372 coding  | noncoding | noncoding | noncoding |
| MSTRG. 200834. 1  |              | XLOC_206214 | 308 coding  | noncoding | noncoding | noncoding |
| MSTRG. 200858. 1  | ESCO1        | XLOC_206221 | 5193 coding | coding    | coding    | noncoding |
| MSTRG. 200840. 1  |              | XLOC_206222 | 234 coding  | noncoding | noncoding | noncoding |
| MSTRG. 200846. 1  | SNRPD1       | XLOC_206224 | 252 coding  | noncoding | noncoding | noncoding |
| MSTRG. 200953. 8  | ABHD3        | XLOC_206230 | 1978 coding | noncoding | noncoding | noncoding |
| MSTRG. 201005. 1  | MIB1         | XLOC_206238 | 237 coding  | noncoding | noncoding | noncoding |
| MSTRG. 200967. 1  | LINC01900    | XLOC_206250 | 282 coding  | noncoding | noncoding | noncoding |
| MSTRG. 200973. 1  |              | XLOC_206253 | 227 coding  | noncoding | noncoding | noncoding |
| MSTRG. 200999. 1  |              | XLOC_206272 | 287 coding  | noncoding | noncoding | noncoding |
| MSTRG. 201033. 1  |              | XLOC_206292 | 296 coding  | noncoding | noncoding | noncoding |
| MSTRG. 201034. 1  |              | XLOC_206293 | 238 coding  | noncoding | noncoding | noncoding |
| MSTRG. 201098. 1  | LAMA3        | XLOC_206324 | 385 coding  | noncoding | noncoding | noncoding |
| XR_935293. 2      | LOC105372026 | XLOC_206368 | 5014 coding | coding    | noncoding | noncoding |
| MSTRG. 201205. 1  |              | XLOC_206394 | 406 coding  | noncoding | noncoding | noncoding |
| MSTRG. 201207. 1  |              | XLOC_206395 | 298 coding  | noncoding | noncoding | noncoding |
| MSTRG. 201254. 1  |              | XLOC_206412 | 256 coding  | noncoding | noncoding | noncoding |
| MSTRG. 201273. 1  | PSMA8        | XLOC_206426 | 309 coding  | noncoding | noncoding | noncoding |
| MSTRG. 201372. 1  | TAF4B        | XLOC_206432 | 214 coding  | noncoding | noncoding | noncoding |
| MSTRG. 201375. 1  | TAF4B        | XLOC_206435 | 235 coding  | noncoding | noncoding | noncoding |
| MSTRG. 201376. 1  | TAF4B        | XLOC_206436 | 279 coding  | noncoding | noncoding | noncoding |
| MSTRG. 201302. 1  |              | XLOC_206460 | 278 coding  | noncoding | noncoding | noncoding |
| MSTRG. 201344. 1  | AQP4-AS1     | XLOC_206462 | 313 coding  | noncoding | noncoding | noncoding |
| MSTRG. 201382. 1  |              | XLOC_206512 | 292 coding  | noncoding | noncoding | noncoding |
| MSTRG. 201403. 1  |              | XLOC_206525 | 259 coding  | noncoding | noncoding | noncoding |
| MSTRG. 201469. 1  |              | XLOC_206545 | 259 coding  | noncoding | noncoding | noncoding |
| MSTRG. 201509. 1  |              | XLOC_206570 | 252 coding  | noncoding | noncoding | noncoding |
| NM_001942. 4      | DSG1         | XLOC_206573 | 7191 coding | coding    | coding    | coding    |
| NM_001943. 5      | DSG2         | XLOC_206580 | 5697 coding | coding    | coding    | coding    |

|                   |           |             |              |           |           |           |
|-------------------|-----------|-------------|--------------|-----------|-----------|-----------|
| NM_000371. 3      | TTR       | XLOC_206582 | 929 coding   | coding    | coding    | coding    |
| MSTRG. 201561. 1  |           | XLOC_206599 | 209 coding   | noncoding | noncoding | noncoding |
| XM_011526045. 3   | RNF125    | XLOC_206601 | 1532 coding  | coding    | coding    | coding    |
| MSTRG. 201601. 1  | RNF125    | XLOC_206606 | 239 coding   | noncoding | noncoding | noncoding |
| XM_005258285. 1   | RNF138    | XLOC_206607 | 3347 coding  | coding    | noncoding | coding    |
| MSTRG. 201623. 1  | GAREM1    | XLOC_206616 | 216 coding   | noncoding | noncoding | noncoding |
| MSTRG. 201680. 1  | ASXL3     | XLOC_206653 | 215 coding   | noncoding | noncoding | noncoding |
| MSTRG. 201711. 1  | NOL4      | XLOC_206663 | 504 coding   | noncoding | coding    | noncoding |
| MSTRG. 201695. 1  |           | XLOC_206664 | 295 coding   | noncoding | noncoding | noncoding |
| MSTRG. 201696. 1  |           | XLOC_206665 | 231 coding   | noncoding | noncoding | noncoding |
| MSTRG. 201722. 1  | DTNA      | XLOC_206670 | 299 coding   | noncoding | noncoding | noncoding |
| MSTRG. 201734. 1  | DTNA      | XLOC_206673 | 437 coding   | noncoding | noncoding | noncoding |
| MSTRG. 201713. 1  |           | XLOC_206678 | 364 coding   | noncoding | noncoding | noncoding |
| MSTRG. 201786. 1  |           | XLOC_206733 | 292 coding   | noncoding | noncoding | noncoding |
| MSTRG. 201791. 1  |           | XLOC_206736 | 268 coding   | noncoding | noncoding | noncoding |
| MSTRG. 201817. 1  |           | XLOC_206738 | 270 coding   | noncoding | noncoding | noncoding |
| MSTRG. 201845. 1  |           | XLOC_206750 | 231 coding   | noncoding | coding    | noncoding |
| MSTRG. 201893. 1  | ELP2      | XLOC_206777 | 259 coding   | noncoding | noncoding | noncoding |
| MSTRG. 202290. 1  | FHOD3     | XLOC_206789 | 254 coding   | noncoding | noncoding | noncoding |
| XM_005258318. 5   | KIAA1328  | XLOC_206799 | 6420 coding  | coding    | coding    | coding    |
| MSTRG. 202335. 1  | KIAA1328  | XLOC_206800 | 552 coding   | noncoding | noncoding | noncoding |
| MSTRG. 201910. 1  |           | XLOC_206817 | 252 coding   | noncoding | noncoding | noncoding |
| MSTRG. 201918. 1  |           | XLOC_206821 | 312 coding   | noncoding | noncoding | noncoding |
| MSTRG. 201964. 1  |           | XLOC_206839 | 261 coding   | noncoding | noncoding | noncoding |
| MSTRG. 201996. 1  |           | XLOC_206840 | 545 coding   | noncoding | noncoding | noncoding |
| MSTRG. 202017. 1  | MIR924HG  | XLOC_206848 | 297 coding   | noncoding | noncoding | noncoding |
| MSTRG. 202026. 1  | MIR924HG  | XLOC_206853 | 247 coding   | noncoding | noncoding | noncoding |
| MSTRG. 202000. 1  |           | XLOC_206865 | 417 coding   | noncoding | noncoding | noncoding |
| MSTRG. 202075. 1  |           | XLOC_206893 | 221 coding   | noncoding | noncoding | noncoding |
| MSTRG. 202085. 1  |           | XLOC_206897 | 308 coding   | noncoding | noncoding | noncoding |
| MSTRG. 202099. 1  |           | XLOC_206906 | 208 coding   | noncoding | noncoding | noncoding |
| MSTRG. 202223. 1  |           | XLOC_206931 | 266 coding   | noncoding | noncoding | noncoding |
| MSTRG. 202264. 1  | LINC00907 | XLOC_206941 | 303 coding   | noncoding | noncoding | noncoding |
| MSTRG. 202130. 1  |           | XLOC_206962 | 318 coding   | noncoding | noncoding | noncoding |
| MSTRG. 202149. 1  |           | XLOC_206974 | 212 coding   | coding    | noncoding | noncoding |
| XM_024451151. 1   | SETBP1    | XLOC_206999 | 18382 coding | noncoding | coding    | coding    |
| XM_011526144. 1   | SLC14A1   | XLOC_207045 | 1655 coding  | coding    | coding    | coding    |
| NM_001308278. 2   | SLC14A1   | XLOC_207045 | 3745 coding  | coding    | coding    | coding    |
| MSTRG. 202439. 1  | HAUS1     | XLOC_207077 | 202 coding   | noncoding | noncoding | noncoding |
| MSTRG. 202440. 1  |           | XLOC_207078 | 315 coding   | noncoding | noncoding | noncoding |
| MSTRG. 202484. 1  | ST8SIA5   | XLOC_207117 | 246 coding   | noncoding | noncoding | noncoding |
| MSTRG. 202613. 28 | HDHD2     | XLOC_207137 | 2261 coding  | coding    | noncoding | noncoding |
| MSTRG. 202643. 1  | ZBTB7C    | XLOC_207176 | 250 coding   | noncoding | noncoding | noncoding |

|                  |              |             |              |           |           |           |
|------------------|--------------|-------------|--------------|-----------|-----------|-----------|
| MSTRG. 202689. 1 |              | XLOC_207181 | 283 coding   | noncoding | noncoding | noncoding |
| XR_243880. 2     | LINC02837    | XLOC_207201 | 2260 coding  | noncoding | noncoding | noncoding |
| NM_006033. 4     | LIPG         | XLOC_207203 | 10418 coding | coding    | coding    | coding    |
| XR_001753447. 2  | LOC107984031 | XLOC_207207 | 3627 coding  | noncoding | noncoding | noncoding |
| MSTRG. 202747. 1 | MYO5B        | XLOC_207218 | 256 coding   | coding    | coding    | noncoding |
| MSTRG. 202754. 1 | MYO5B        | XLOC_207224 | 218 coding   | noncoding | noncoding | noncoding |
| NM_001039535. 3  | SKA1         | XLOC_207230 | 2894 coding  | coding    | coding    | coding    |
| XM_011526077. 2  | MAPK4        | XLOC_207233 | 5747 coding  | coding    | coding    | coding    |
| MSTRG. 202818. 1 |              | XLOC_207238 | 345 coding   | noncoding | noncoding | noncoding |
| MSTRG. 202838. 1 |              | XLOC_207246 | 275 coding   | noncoding | noncoding | noncoding |
| MSTRG. 202879. 1 |              | XLOC_207262 | 270 coding   | noncoding | noncoding | noncoding |
| MSTRG. 202909. 1 |              | XLOC_207275 | 678 coding   | noncoding | noncoding | noncoding |
| NR_040074. 1     | LINC01630    | XLOC_207276 | 1799 coding  | noncoding | noncoding | noncoding |
| MSTRG. 202972. 1 | DCC          | XLOC_207297 | 308 coding   | noncoding | noncoding | noncoding |
| MSTRG. 202989. 1 | DCC          | XLOC_207303 | 282 coding   | noncoding | noncoding | noncoding |
| MSTRG. 203011. 1 |              | XLOC_207327 | 300 coding   | noncoding | noncoding | noncoding |
| XM_024451081. 1  | POLI         | XLOC_207346 | 4018 coding  | coding    | coding    | coding    |
| MSTRG. 203060. 1 |              | XLOC_207351 | 471 coding   | noncoding | noncoding | noncoding |
| MSTRG. 203062. 1 |              | XLOC_207357 | 283 coding   | noncoding | noncoding | noncoding |
| MSTRG. 203140. 3 | TCF4         | XLOC_207368 | 2074 coding  | coding    | noncoding | coding    |
| MSTRG. 203096. 1 |              | XLOC_207378 | 302 coding   | noncoding | noncoding | noncoding |
| MSTRG. 203120. 1 | LOC642484    | XLOC_207382 | 321 coding   | noncoding | noncoding | noncoding |
| MSTRG. 203112. 1 |              | XLOC_207388 | 285 coding   | noncoding | noncoding | noncoding |
| XM_006722431. 2  | WDR7         | XLOC_207400 | 7201 coding  | coding    | coding    | coding    |
| NM_001257964. 2  | BOD1L2       | XLOC_207441 | 3324 coding  | coding    | coding    | coding    |
| MSTRG. 203189. 1 |              | XLOC_207455 | 261 coding   | noncoding | noncoding | noncoding |
| MSTRG. 203277. 4 | FECH         | XLOC_207457 | 3693 coding  | coding    | noncoding | noncoding |
| MSTRG. 203282. 1 |              | XLOC_207460 | 272 coding   | noncoding | noncoding | noncoding |
| MSTRG. 203284. 1 |              | XLOC_207461 | 278 coding   | noncoding | noncoding | noncoding |
| MSTRG. 203290. 1 | ATP8B1       | XLOC_207466 | 230 coding   | noncoding | noncoding | noncoding |
| MSTRG. 203302. 1 | ATP8B1       | XLOC_207471 | 237 coding   | noncoding | noncoding | noncoding |
| MSTRG. 203194. 1 |              | XLOC_207475 | 503 coding   | noncoding | noncoding | noncoding |
| MSTRG. 203200. 1 |              | XLOC_207477 | 232 coding   | noncoding | noncoding | noncoding |
| NM_001144967. 3  | NEDD4L       | XLOC_207478 | 8633 coding  | coding    | coding    | coding    |
| MSTRG. 203274. 1 |              | XLOC_207507 | 206 coding   | noncoding | noncoding | noncoding |
| MSTRG. 203321. 1 |              | XLOC_207516 | 238 coding   | noncoding | noncoding | noncoding |
| MSTRG. 203353. 1 | RAX          | XLOC_207523 | 270 coding   | noncoding | coding    | noncoding |
| MSTRG. 203380. 1 | CCBE1        | XLOC_207533 | 311 coding   | noncoding | noncoding | noncoding |
| MSTRG. 203392. 1 | CCBE1        | XLOC_207539 | 277 coding   | noncoding | noncoding | noncoding |
| MSTRG. 203372. 1 |              | XLOC_207544 | 283 coding   | noncoding | noncoding | noncoding |
| MSTRG. 203374. 1 |              | XLOC_207546 | 352 coding   | noncoding | noncoding | noncoding |
| MSTRG. 203400. 1 |              | XLOC_207550 | 248 coding   | noncoding | noncoding | noncoding |
| MSTRG. 203413. 1 |              | XLOC_207557 | 210 coding   | noncoding | noncoding | noncoding |

|                   |              |             |              |           |           |           |
|-------------------|--------------|-------------|--------------|-----------|-----------|-----------|
| MSTRG. 203418. 1  | LOC105372152 | XLOC_207560 | 260 coding   | noncoding | noncoding | noncoding |
| MSTRG. 203423. 1  |              | XLOC_207564 | 299 coding   | noncoding | noncoding | noncoding |
| MSTRG. 203429. 1  |              | XLOC_207567 | 209 coding   | noncoding | noncoding | noncoding |
| MSTRG. 203454. 1  |              | XLOC_207581 | 224 coding   | noncoding | noncoding | noncoding |
| MSTRG. 203469. 1  | CDH20        | XLOC_207587 | 304 coding   | noncoding | noncoding | noncoding |
| MSTRG. 203515. 1  |              | XLOC_207645 | 250 coding   | noncoding | noncoding | noncoding |
| XM_006722493. 3   | ZCCHC2       | XLOC_207662 | 5326 coding  | coding    | coding    | coding    |
| MSTRG. 203524. 1  |              | XLOC_207665 | 235 coding   | noncoding | noncoding | noncoding |
| MSTRG. 203592. 1  | PHLPP1       | XLOC_207672 | 310 coding   | noncoding | noncoding | noncoding |
| MSTRG. 203676. 2  | VPS4B        | XLOC_207696 | 3137 coding  | coding    | noncoding | noncoding |
| MSTRG. 203685. 1  | SERPINB3     | XLOC_207708 | 312 coding   | coding    | noncoding | noncoding |
| MSTRG. 203693. 1  |              | XLOC_207716 | 234 coding   | noncoding | noncoding | noncoding |
| MSTRG. 203744. 1  | HMSD         | XLOC_207722 | 331 coding   | noncoding | noncoding | noncoding |
| MSTRG. 203731. 1  | LINC01924    | XLOC_207736 | 245 coding   | noncoding | noncoding | noncoding |
| MSTRG. 203712. 1  |              | XLOC_207739 | 265 coding   | noncoding | noncoding | noncoding |
| MSTRG. 203738. 1  |              | XLOC_207745 | 280 coding   | noncoding | noncoding | noncoding |
| MSTRG. 203768. 1  | LOC107985178 | XLOC_207748 | 292 coding   | noncoding | noncoding | noncoding |
| MSTRG. 203773. 1  | LOC101927404 | XLOC_207751 | 296 coding   | noncoding | noncoding | noncoding |
| MSTRG. 203765. 1  |              | XLOC_207754 | 260 coding   | noncoding | noncoding | noncoding |
| MSTRG. 203775. 1  |              | XLOC_207755 | 324 coding   | noncoding | noncoding | noncoding |
| MSTRG. 203784. 1  |              | XLOC_207759 | 303 coding   | noncoding | noncoding | noncoding |
| NM_001362438. 2   | CDH7         | XLOC_207767 | 12938 coding | coding    | coding    | coding    |
| MSTRG. 203866. 1  | LOC643542    | XLOC_207799 | 312 coding   | noncoding | noncoding | noncoding |
| MSTRG. 203883. 1  | LOC643542    | XLOC_207806 | 287 coding   | noncoding | noncoding | noncoding |
| XM_017025975. 1   | CCDC102B     | XLOC_207812 | 2901 coding  | noncoding | coding    | coding    |
| MSTRG. 203954. 1  |              | XLOC_207826 | 314 coding   | coding    | noncoding | noncoding |
| MSTRG. 204037. 1  | DOK6         | XLOC_207837 | 206 coding   | noncoding | noncoding | noncoding |
| MSTRG. 204090. 1  | CD226        | XLOC_207868 | 4232 coding  | coding    | noncoding | noncoding |
| MSTRG. 204090. 11 | CD226        | XLOC_207868 | 549 coding   | coding    | noncoding | noncoding |
| MSTRG. 204014. 1  |              | XLOC_207909 | 265 coding   | noncoding | noncoding | noncoding |
| MSTRG. 204111. 1  |              | XLOC_207930 | 324 coding   | noncoding | noncoding | noncoding |
| MSTRG. 204195. 1  |              | XLOC_207949 | 281 coding   | noncoding | noncoding | noncoding |
| MSTRG. 204280. 1  | LOC400655    | XLOC_207985 | 347 coding   | noncoding | noncoding | noncoding |
| MSTRG. 204319. 1  |              | XLOC_207997 | 263 coding   | noncoding | noncoding | noncoding |
| MSTRG. 204331. 1  |              | XLOC_208008 | 335 coding   | noncoding | noncoding | noncoding |
| MSTRG. 204342. 1  | FBXO15       | XLOC_208014 | 247 coding   | coding    | noncoding | noncoding |
| MSTRG. 204345. 1  | FBXO15       | XLOC_208017 | 252 coding   | noncoding | coding    | noncoding |
| MSTRG. 204352. 1  |              | XLOC_208028 | 304 coding   | noncoding | noncoding | noncoding |
| MSTRG. 204384. 1  | DIPK1C       | XLOC_208036 | 312 coding   | noncoding | noncoding | noncoding |
| NM_001370250. 1   | CNDP2        | XLOC_208038 | 4988 coding  | coding    | coding    | coding    |
| MSTRG. 204409. 1  |              | XLOC_208146 | 256 coding   | noncoding | noncoding | noncoding |
| MSTRG. 204527. 3  | ZNF516       | XLOC_208180 | 5713 coding  | coding    | coding    | coding    |
| MSTRG. 204523. 1  |              | XLOC_208198 | 273 coding   | noncoding | noncoding | noncoding |

|                |              |             |              |           |           |           |
|----------------|--------------|-------------|--------------|-----------|-----------|-----------|
| NM_007345.3    | ZNF236       | XLOC_208207 | 8124 coding  | coding    | coding    | coding    |
| MSTRG.204558.1 |              | XLOC_208223 | 284 coding   | noncoding | noncoding | noncoding |
| MSTRG.204654.1 |              | XLOC_208230 | 228 coding   | noncoding | noncoding | noncoding |
| NM_001318511.2 | CTDP1        | XLOC_208289 | 5699 coding  | coding    | coding    | coding    |
| MSTRG.204819.1 | TXNL4A       | XLOC_208299 | 445 coding   | noncoding | noncoding | noncoding |
| MSTRG.204821.1 | TXNL4A       | XLOC_208300 | 272 coding   | noncoding | noncoding | noncoding |
| MSTRG.204835.1 |              | XLOC_208318 | 262 coding   | noncoding | noncoding | noncoding |
| MSTRG.199642.1 | TUBB8P12     | XLOC_208321 | 262 coding   | noncoding | noncoding | noncoding |
| XM_017026104.2 | THOC1        | XLOC_208328 | 1995 coding  | coding    | coding    | coding    |
| MSTRG.199664.1 | COLEC12      | XLOC_208331 | 267 coding   | noncoding | noncoding | noncoding |
| MSTRG.199656.1 |              | XLOC_208335 | 257 coding   | coding    | noncoding | noncoding |
| MSTRG.199694.1 | CLUL1        | XLOC_208339 | 246 coding   | noncoding | noncoding | noncoding |
| MSTRG.199696.1 | CLUL1        | XLOC_208341 | 228 coding   | noncoding | noncoding | noncoding |
| XM_024451215.1 | ENOSF1       | XLOC_208342 | 3625 coding  | coding    | coding    | coding    |
| MSTRG.199743.1 |              | XLOC_208370 | 336 coding   | noncoding | noncoding | noncoding |
| MSTRG.199789.1 |              | XLOC_208391 | 227 coding   | noncoding | noncoding | noncoding |
| MSTRG.199798.1 | METTL4       | XLOC_208395 | 277 coding   | noncoding | noncoding | noncoding |
| MSTRG.199806.1 |              | XLOC_208403 | 253 coding   | noncoding | noncoding | noncoding |
| XM_005258178.3 | LPIN2        | XLOC_208405 | 6223 coding  | coding    | coding    | coding    |
| MSTRG.199886.1 | MYOM1        | XLOC_208439 | 241 coding   | noncoding | noncoding | noncoding |
| MSTRG.199829.1 |              | XLOC_208447 | 344 coding   | noncoding | noncoding | noncoding |
| XM_024451288.1 | DLGAP1       | XLOC_208456 | 7285 coding  | coding    | coding    | coding    |
| MSTRG.199951.1 | DLGAP1       | XLOC_208458 | 282 coding   | noncoding | noncoding | noncoding |
| MSTRG.199955.1 | DLGAP1       | XLOC_208461 | 274 coding   | noncoding | noncoding | noncoding |
| MSTRG.199965.1 | DLGAP1       | XLOC_208465 | 275 coding   | noncoding | noncoding | noncoding |
| MSTRG.200001.1 | DLGAP1-AS4   | XLOC_208480 | 269 coding   | noncoding | noncoding | noncoding |
| MSTRG.200017.1 | DLGAP1       | XLOC_208487 | 249 coding   | noncoding | noncoding | noncoding |
| MSTRG.199908.1 |              | XLOC_208491 | 272 coding   | noncoding | noncoding | noncoding |
| MSTRG.199909.1 |              | XLOC_208492 | 237 coding   | noncoding | noncoding | noncoding |
| MSTRG.199919.1 |              | XLOC_208496 | 269 coding   | coding    | noncoding | noncoding |
| MSTRG.199920.1 |              | XLOC_208497 | 368 coding   | noncoding | noncoding | noncoding |
| NR_026849.1    | LINC00526    | XLOC_208501 | 1306 coding  | noncoding | coding    | noncoding |
| MSTRG.200046.1 | EPB41L3      | XLOC_208518 | 303 coding   | noncoding | noncoding | noncoding |
| XM_011525729.3 | TMEM200C     | XLOC_208526 | 15766 coding | coding    | coding    | coding    |
| MSTRG.200161.1 | L3MBTL4      | XLOC_208536 | 253 coding   | noncoding | noncoding | noncoding |
| MSTRG.200052.1 |              | XLOC_208543 | 297 coding   | noncoding | noncoding | noncoding |
| MSTRG.200070.1 | LOC107985176 | XLOC_208551 | 417 coding   | noncoding | noncoding | noncoding |
| MSTRG.200083.1 | ARHGAP28     | XLOC_208557 | 301 coding   | noncoding | noncoding | noncoding |
| MSTRG.200084.1 | ARHGAP28     | XLOC_208558 | 228 coding   | noncoding | noncoding | noncoding |
| MSTRG.200090.1 | ARHGAP28     | XLOC_208561 | 219 coding   | noncoding | noncoding | noncoding |
| MSTRG.200091.1 |              | XLOC_208568 | 256 coding   | noncoding | noncoding | noncoding |
| MSTRG.200095.1 |              | XLOC_208569 | 228 coding   | noncoding | noncoding | noncoding |
| MSTRG.200096.1 | LOC105371973 | XLOC_208571 | 288 coding   | noncoding | noncoding | noncoding |

|                |           |             |              |           |           |           |
|----------------|-----------|-------------|--------------|-----------|-----------|-----------|
| MSTRG.200115.1 |           | XLOC_208578 | 310 coding   | noncoding | noncoding | noncoding |
| MSTRG.200207.1 |           | XLOC_208598 | 361 coding   | noncoding | noncoding | noncoding |
| MSTRG.200209.4 | RAB12     | XLOC_208599 | 2483 coding  | coding    | noncoding | noncoding |
| MSTRG.200205.1 |           | XLOC_208601 | 317 coding   | noncoding | noncoding | noncoding |
| MSTRG.200217.1 |           | XLOC_208609 | 221 coding   | noncoding | noncoding | noncoding |
| MSTRG.200303.1 |           | XLOC_208632 | 422 coding   | noncoding | noncoding | noncoding |
| XM_011525723.3 | PIEZO2    | XLOC_208685 | 10678 coding | coding    | noncoding | coding    |
| MSTRG.200481.1 | PIEZO2    | XLOC_208694 | 302 coding   | noncoding | noncoding | noncoding |
| MSTRG.200483.1 | PIEZO2    | XLOC_208696 | 209 coding   | noncoding | noncoding | noncoding |
| MSTRG.200487.1 | PIEZO2    | XLOC_208698 | 221 coding   | noncoding | noncoding | noncoding |
| MSTRG.200489.1 | PIEZO2    | XLOC_208699 | 323 coding   | noncoding | noncoding | noncoding |
| MSTRG.200491.1 | PIEZO2    | XLOC_208700 | 259 coding   | noncoding | noncoding | noncoding |
| MSTRG.200444.1 |           | XLOC_208703 | 252 coding   | noncoding | noncoding | noncoding |
| MSTRG.200451.1 |           | XLOC_208711 | 231 coding   | noncoding | noncoding | noncoding |
| MSTRG.200541.1 | GNAL      | XLOC_208721 | 210 coding   | noncoding | noncoding | noncoding |
| MSTRG.200508.1 |           | XLOC_208735 | 368 coding   | noncoding | noncoding | noncoding |
| MSTRG.200510.1 |           | XLOC_208737 | 242 coding   | noncoding | noncoding | noncoding |
| MSTRG.200516.1 | ANKRD62   | XLOC_208741 | 318 coding   | noncoding | noncoding | noncoding |
| MSTRG.200518.1 | ANKRD62   | XLOC_208743 | 244 coding   | noncoding | noncoding | noncoding |
| XM_024451224.1 | SPIRE1    | XLOC_208746 | 5654 coding  | coding    | coding    | coding    |
| MSTRG.200579.1 | SPIRE1    | XLOC_208748 | 245 coding   | noncoding | noncoding | noncoding |
| MSTRG.200586.1 | SPIRE1    | XLOC_208750 | 220 coding   | noncoding | noncoding | noncoding |
| MSTRG.200592.1 | SPIRE1    | XLOC_208752 | 270 coding   | noncoding | noncoding | noncoding |
| MSTRG.200558.1 | LINC01882 | XLOC_208761 | 331 coding   | noncoding | noncoding | noncoding |
| MSTRG.200629.1 |           | XLOC_208782 | 296 coding   | noncoding | noncoding | noncoding |
| MSTRG.200706.1 |           | XLOC_208826 | 337 coding   | noncoding | noncoding | noncoding |
| NR_134878.1    | POTEC     | XLOC_208862 | 6571 coding  | coding    | coding    | coding    |
| MSTRG.200776.1 |           | XLOC_208866 | 340 coding   | noncoding | noncoding | noncoding |
| MSTRG.200835.1 |           | XLOC_208925 | 308 coding   | noncoding | noncoding | noncoding |
| MSTRG.200866.1 |           | XLOC_208944 | 202 coding   | noncoding | noncoding | noncoding |
| MSTRG.200966.1 | LINC01900 | XLOC_208951 | 337 coding   | noncoding | noncoding | noncoding |
| MSTRG.200963.1 |           | XLOC_208952 | 263 coding   | noncoding | noncoding | noncoding |
| NM_172241.3    | CTAGE1    | XLOC_208964 | 4317 coding  | noncoding | coding    | coding    |
| MSTRG.201032.1 |           | XLOC_208976 | 296 coding   | noncoding | noncoding | noncoding |
| MSTRG.201051.1 | CABLES1   | XLOC_208980 | 317 coding   | noncoding | noncoding | noncoding |
| MSTRG.201080.2 | RIOK3     | XLOC_208989 | 3669 coding  | coding    | coding    | noncoding |
| MSTRG.201108.1 | LAMA3     | XLOC_209000 | 244 coding   | noncoding | noncoding | noncoding |
| MSTRG.201110.1 | LAMA3     | XLOC_209001 | 321 coding   | noncoding | noncoding | noncoding |
| MSTRG.201138.1 | CABYR     | XLOC_209008 | 245 coding   | noncoding | noncoding | noncoding |
| MSTRG.201150.1 | OSBPL1A   | XLOC_209014 | 299 coding   | noncoding | noncoding | noncoding |
| MSTRG.201152.1 | OSBPL1A   | XLOC_209016 | 208 coding   | noncoding | noncoding | noncoding |
| MSTRG.201188.1 |           | XLOC_209033 | 310 coding   | noncoding | noncoding | noncoding |
| MSTRG.201231.1 | ZNF521    | XLOC_209052 | 398 coding   | noncoding | noncoding | noncoding |

|                  |              |             |              |           |           |           |
|------------------|--------------|-------------|--------------|-----------|-----------|-----------|
| MSTRG. 201206. 1 |              | XLOC_209057 | 290 coding   | noncoding | noncoding | noncoding |
| MSTRG. 201208. 1 |              | XLOC_209058 | 298 coding   | noncoding | noncoding | noncoding |
| MSTRG. 201211. 1 |              | XLOC_209061 | 279 coding   | noncoding | noncoding | noncoding |
| MSTRG. 201255. 1 |              | XLOC_209070 | 256 coding   | noncoding | noncoding | noncoding |
| MSTRG. 201371. 3 | TAF4B        | XLOC_209091 | 480 coding   | noncoding | noncoding | noncoding |
| MSTRG. 201332. 1 | KCTD1        | XLOC_209099 | 264 coding   | noncoding | noncoding | noncoding |
| NM_031422. 6     | CHST9        | XLOC_209112 | 11379 coding | coding    | coding    | coding    |
| MSTRG. 201348. 1 | CHST9        | XLOC_209114 | 241 coding   | noncoding | noncoding | noncoding |
| MSTRG. 201310. 1 | LINC01908    | XLOC_209118 | 230 coding   | noncoding | noncoding | noncoding |
| MSTRG. 201369. 1 |              | XLOC_209130 | 321 coding   | noncoding | noncoding | noncoding |
| MSTRG. 201387. 1 |              | XLOC_209140 | 213 coding   | noncoding | noncoding | noncoding |
| MSTRG. 201467. 1 |              | XLOC_209159 | 370 coding   | noncoding | noncoding | noncoding |
| MSTRG. 201468. 1 |              | XLOC_209160 | 259 coding   | noncoding | noncoding | noncoding |
| MSTRG. 201470. 1 |              | XLOC_209161 | 259 coding   | noncoding | noncoding | noncoding |
| MSTRG. 201479. 1 |              | XLOC_209167 | 488 coding   | noncoding | noncoding | noncoding |
| MSTRG. 201480. 1 |              | XLOC_209168 | 241 coding   | noncoding | noncoding | noncoding |
| MSTRG. 201481. 1 |              | XLOC_209169 | 246 coding   | noncoding | noncoding | noncoding |
| MSTRG. 201494. 1 |              | XLOC_209176 | 231 coding   | noncoding | noncoding | noncoding |
| MSTRG. 201508. 1 |              | XLOC_209191 | 252 coding   | noncoding | noncoding | noncoding |
| MSTRG. 201524. 1 | TTR          | XLOC_209200 | 283 coding   | noncoding | noncoding | noncoding |
| MSTRG. 201565. 1 |              | XLOC_209230 | 268 coding   | noncoding | noncoding | noncoding |
| MSTRG. 201590. 1 |              | XLOC_209231 | 283 coding   | noncoding | noncoding | noncoding |
| MSTRG. 201632. 1 |              | XLOC_209251 | 255 coding   | noncoding | noncoding | noncoding |
| MSTRG. 201660. 1 | CCDC178      | XLOC_209255 | 296 coding   | noncoding | noncoding | noncoding |
| MSTRG. 201693. 1 | LOC107985157 | XLOC_209274 | 266 coding   | noncoding | noncoding | noncoding |
| MSTRG. 201712. 1 | NOL4         | XLOC_209282 | 331 coding   | coding    | noncoding | noncoding |
| MSTRG. 201697. 1 |              | XLOC_209283 | 934 coding   | noncoding | noncoding | noncoding |
| MSTRG. 201715. 1 |              | XLOC_209303 | 231 coding   | noncoding | noncoding | noncoding |
| MSTRG. 201833. 4 | GALNT1       | XLOC_209328 | 612 coding   | coding    | noncoding | noncoding |
| MSTRG. 201862. 1 | MOCOS        | XLOC_209360 | 206 coding   | noncoding | noncoding | noncoding |
| MSTRG. 202286. 1 | FHOD3        | XLOC_209366 | 295 coding   | noncoding | noncoding | noncoding |
| MSTRG. 202298. 1 | FHOD3        | XLOC_209374 | 294 coding   | noncoding | noncoding | noncoding |
| MSTRG. 201901. 1 |              | XLOC_209416 | 215 coding   | noncoding | noncoding | noncoding |
| MSTRG. 201905. 1 |              | XLOC_209420 | 294 coding   | noncoding | noncoding | noncoding |
| MSTRG. 201907. 1 |              | XLOC_209421 | 201 coding   | noncoding | noncoding | noncoding |
| MSTRG. 201909. 1 |              | XLOC_209423 | 406 coding   | noncoding | noncoding | noncoding |
| MSTRG. 201949. 1 |              | XLOC_209448 | 262 coding   | noncoding | noncoding | noncoding |
| MSTRG. 201961. 1 |              | XLOC_209455 | 202 coding   | coding    | noncoding | noncoding |
| MSTRG. 201963. 1 |              | XLOC_209457 | 381 coding   | noncoding | noncoding | noncoding |
| MSTRG. 201965. 1 |              | XLOC_209458 | 374 coding   | noncoding | noncoding | noncoding |
| MSTRG. 201995. 1 |              | XLOC_209459 | 433 coding   | noncoding | noncoding | noncoding |
| MSTRG. 201983. 1 |              | XLOC_209462 | 325 coding   | noncoding | noncoding | noncoding |
| MSTRG. 202025. 1 | MIR924HG     | XLOC_209468 | 247 coding   | noncoding | noncoding | noncoding |

|                   |              |             |             |           |           |           |
|-------------------|--------------|-------------|-------------|-----------|-----------|-----------|
| MSTRG. 202044. 1  |              | XLOC_209489 | 275 coding  | noncoding | noncoding | noncoding |
| MSTRG. 202076. 1  |              | XLOC_209503 | 263 coding  | noncoding | noncoding | noncoding |
| MSTRG. 202265. 1  | LINC00907    | XLOC_209565 | 303 coding  | noncoding | noncoding | noncoding |
| MSTRG. 202165. 1  | LINC01478    | XLOC_209588 | 225 coding  | noncoding | noncoding | noncoding |
| MSTRG. 202344. 1  |              | XLOC_209604 | 226 coding  | noncoding | noncoding | noncoding |
| MSTRG. 202360. 1  | SLC14A2      | XLOC_209612 | 309 coding  | noncoding | noncoding | noncoding |
| MSTRG. 202372. 9  | LOC105372093 | XLOC_209620 | 1648 coding | coding    | noncoding | noncoding |
| MSTRG. 202377. 1  | SLC14A2      | XLOC_209623 | 268 coding  | noncoding | noncoding | noncoding |
| XM_017025890. 2   | EPG5         | XLOC_209628 | 7944 coding | noncoding | coding    | coding    |
| MSTRG. 202397. 1  | EPG5         | XLOC_209630 | 277 coding  | noncoding | noncoding | noncoding |
| MSTRG. 202485. 1  | ST8SIA5      | XLOC_209690 | 246 coding  | noncoding | noncoding | noncoding |
| MSTRG. 202498. 1  |              | XLOC_209691 | 295 coding  | noncoding | noncoding | noncoding |
| NM_001324053. 2   | PIAS2        | XLOC_209692 | 5005 coding | coding    | coding    | coding    |
| XM_017026072. 1   | PIAS2        | XLOC_209692 | 1785 coding | coding    | coding    | coding    |
| MSTRG. 202611. 1  | PIAS2        | XLOC_209698 | 261 coding  | noncoding | noncoding | noncoding |
| MSTRG. 202616. 1  | KATNAL2      | XLOC_209702 | 335 coding  | noncoding | noncoding | noncoding |
| MSTRG. 202541. 1  |              | XLOC_209719 | 264 coding  | noncoding | noncoding | noncoding |
| MSTRG. 202546. 1  | MIR4527HG    | XLOC_209721 | 278 coding  | noncoding | noncoding | noncoding |
| MSTRG. 202652. 1  | ZBTB7C       | XLOC_209760 | 368 coding  | noncoding | noncoding | noncoding |
| MSTRG. 202657. 1  |              | XLOC_209765 | 258 coding  | noncoding | noncoding | noncoding |
| MSTRG. 202691. 1  |              | XLOC_209775 | 249 coding  | noncoding | noncoding | noncoding |
| MSTRG. 202758. 23 | DYM          | XLOC_209783 | 278 coding  | coding    | noncoding | noncoding |
| NM_000985. 5      | RPL17        | XLOC_209830 | 863 coding  | coding    | coding    | coding    |
| MSTRG. 202719. 1  | LIPG         | XLOC_209834 | 271 coding  | noncoding | noncoding | noncoding |
| MSTRG. 202808. 1  |              | XLOC_209856 | 255 coding  | noncoding | noncoding | noncoding |
| MSTRG. 202817. 1  |              | XLOC_209861 | 430 coding  | noncoding | noncoding | noncoding |
| MSTRG. 202816. 1  |              | XLOC_209862 | 262 coding  | noncoding | noncoding | noncoding |
| MSTRG. 202942. 1  | LOC105372121 | XLOC_209923 | 271 coding  | noncoding | noncoding | noncoding |
| MSTRG. 202990. 1  | DCC          | XLOC_209941 | 282 coding  | noncoding | noncoding | noncoding |
| MSTRG. 203010. 1  |              | XLOC_209954 | 300 coding  | noncoding | noncoding | noncoding |
| MSTRG. 203025. 1  |              | XLOC_209974 | 298 coding  | noncoding | noncoding | noncoding |
| MSTRG. 203061. 1  |              | XLOC_209987 | 283 coding  | noncoding | noncoding | noncoding |
| MSTRG. 203094. 1  | CCDC68       | XLOC_209998 | 229 coding  | noncoding | noncoding | noncoding |
| MSTRG. 203099. 1  | LINC01416    | XLOC_210030 | 240 coding  | coding    | noncoding | noncoding |
| MSTRG. 203100. 1  | LINC01416    | XLOC_210031 | 278 coding  | noncoding | noncoding | noncoding |
| MSTRG. 203182. 1  |              | XLOC_210062 | 259 coding  | noncoding | noncoding | noncoding |
| MSTRG. 203190. 1  |              | XLOC_210064 | 261 coding  | noncoding | noncoding | noncoding |
| NM_000140. 4      | FECH         | XLOC_210065 | 7677 coding | coding    | coding    | coding    |
| MSTRG. 203278. 1  | FECH         | XLOC_210066 | 253 coding  | noncoding | noncoding | noncoding |
| MSTRG. 203283. 1  |              | XLOC_210068 | 272 coding  | noncoding | noncoding | noncoding |
| MSTRG. 203305. 1  | ATP8B1       | XLOC_210079 | 288 coding  | noncoding | noncoding | noncoding |
| MSTRG. 203205. 1  |              | XLOC_210105 | 258 coding  | noncoding | noncoding | noncoding |
| MSTRG. 203275. 1  |              | XLOC_210109 | 206 coding  | noncoding | noncoding | noncoding |

|                |   |              |             |              |           |           |           |
|----------------|---|--------------|-------------|--------------|-----------|-----------|-----------|
| MSTRG. 203336. | 2 | ZNF532       | XLOC_210110 | 1108 coding  | noncoding | noncoding | noncoding |
| MSTRG. 203337. | 1 | ZNF532       | XLOC_210111 | 289 coding   | noncoding | noncoding | noncoding |
| MSTRG. 203341. | 1 | ZNF532       | XLOC_210115 | 308 coding   | noncoding | noncoding | noncoding |
| MSTRG. 203358. | 1 |              | XLOC_210127 | 298 coding   | noncoding | noncoding | noncoding |
| MSTRG. 203379. | 1 | CCBE1        | XLOC_210130 | 311 coding   | noncoding | noncoding | noncoding |
| MSTRG. 203403. | 1 |              | XLOC_210143 | 318 coding   | noncoding | noncoding | noncoding |
| MSTRG. 203411. | 1 |              | XLOC_210147 | 311 coding   | noncoding | noncoding | noncoding |
| MSTRG. 203426. | 1 |              | XLOC_210153 | 443 coding   | noncoding | noncoding | noncoding |
| MSTRG. 203427. | 1 |              | XLOC_210154 | 286 coding   | noncoding | noncoding | noncoding |
| MSTRG. 203457. | 1 |              | XLOC_210169 | 259 coding   | noncoding | noncoding | noncoding |
| MSTRG. 203464. | 1 | CDH20        | XLOC_210173 | 450 coding   | noncoding | noncoding | noncoding |
| MSTRG. 203468. | 1 | CDH20        | XLOC_210176 | 304 coding   | noncoding | noncoding | noncoding |
| MSTRG. 203624. | 1 | PIGN         | XLOC_210201 | 279 coding   | noncoding | noncoding | noncoding |
| MSTRG. 203560. | 7 | ZCCHC2       | XLOC_210223 | 4709 coding  | coding    | coding    | noncoding |
| MSTRG. 203518. | 1 |              | XLOC_210226 | 300 coding   | noncoding | noncoding | noncoding |
| MSTRG. 203519. | 1 |              | XLOC_210227 | 272 coding   | noncoding | noncoding | noncoding |
| MSTRG. 203523. | 1 |              | XLOC_210229 | 235 coding   | noncoding | noncoding | noncoding |
| MSTRG. 203527. | 1 |              | XLOC_210265 | 272 coding   | noncoding | noncoding | noncoding |
| XM_017025690.  | 2 | KDSR         | XLOC_210324 | 5402 coding  | coding    | coding    | coding    |
| MSTRG. 203675. | 5 | VPS4B        | XLOC_210329 | 1706 coding  | coding    | coding    | coding    |
| MSTRG. 203681. | 1 | SERPINB12    | XLOC_210333 | 246 coding   | noncoding | noncoding | noncoding |
| MSTRG. 203697. | 1 |              | XLOC_210340 | 279 coding   | noncoding | noncoding | noncoding |
| MSTRG. 203743. | 1 | HMSD         | XLOC_210346 | 331 coding   | noncoding | noncoding | noncoding |
| MSTRG. 203772. | 1 | LOC101927404 | XLOC_210378 | 296 coding   | noncoding | noncoding | noncoding |
| MSTRG. 203779. | 1 | LOC105372168 | XLOC_210384 | 205 coding   | noncoding | noncoding | noncoding |
| MSTRG. 203782. | 1 |              | XLOC_210385 | 308 coding   | noncoding | noncoding | noncoding |
| MSTRG. 203852. | 1 |              | XLOC_210421 | 289 coding   | noncoding | noncoding | noncoding |
| MSTRG. 203882. | 1 | LOC643542    | XLOC_210433 | 287 coding   | noncoding | noncoding | noncoding |
| MSTRG. 204089. | 1 | CD226        | XLOC_210501 | 12132 coding | coding    | coding    | coding    |
| MSTRG. 204261. | 1 | RTTN         | XLOC_210515 | 276 coding   | noncoding | noncoding | noncoding |
| MSTRG. 204015. | 1 |              | XLOC_210536 | 260 coding   | noncoding | noncoding | noncoding |
| MSTRG. 204016. | 1 |              | XLOC_210537 | 229 coding   | noncoding | noncoding | noncoding |
| MSTRG. 204022. | 1 |              | XLOC_210539 | 284 coding   | noncoding | noncoding | noncoding |
| MSTRG. 204178. | 1 | LOC107985179 | XLOC_210599 | 285 coding   | noncoding | noncoding | noncoding |
| MSTRG. 204194. | 1 |              | XLOC_210606 | 281 coding   | noncoding | noncoding | noncoding |
| XM_017025559.  | 1 | CBLN2        | XLOC_210616 | 6705 coding  | coding    | coding    | coding    |
| MSTRG. 204227. | 1 | CBLN2        | XLOC_210618 | 232 coding   | noncoding | noncoding | noncoding |
| MSTRG. 204221. | 1 |              | XLOC_210620 | 372 coding   | noncoding | noncoding | noncoding |
| MSTRG. 204302. | 1 | NETO1        | XLOC_210622 | 296 coding   | noncoding | noncoding | noncoding |
| MSTRG. 204279. | 1 | LOC400655    | XLOC_210627 | 378 coding   | noncoding | noncoding | noncoding |
| MSTRG. 204285. | 1 |              | XLOC_210628 | 231 coding   | noncoding | noncoding | noncoding |
| MSTRG. 204313. | 1 |              | XLOC_210635 | 445 coding   | noncoding | noncoding | noncoding |
| MSTRG. 204318. | 1 |              | XLOC_210636 | 263 coding   | noncoding | noncoding | noncoding |

|                  |              |             |             |           |           |           |
|------------------|--------------|-------------|-------------|-----------|-----------|-----------|
| MSTRG. 204340. 1 |              | XLOC_210642 | 313 coding  | noncoding | noncoding | noncoding |
| MSTRG. 204370. 1 | C18orf63     | XLOC_210657 | 287 coding  | noncoding | noncoding | noncoding |
| MSTRG. 204388. 1 | CNDP1        | XLOC_210668 | 243 coding  | noncoding | noncoding | noncoding |
| MSTRG. 204391. 1 | CNDP1        | XLOC_210671 | 307 coding  | noncoding | noncoding | noncoding |
| MSTRG. 204402. 1 |              | XLOC_210685 | 300 coding  | noncoding | noncoding | noncoding |
| NM_001037331. 3  | SMIM21       | XLOC_210693 | 1834 coding | noncoding | noncoding | noncoding |
| XM_011525928. 1  | SMIM21       | XLOC_210693 | 8885 coding | noncoding | coding    | noncoding |
| MSTRG. 204439. 1 |              | XLOC_210711 | 206 coding  | noncoding | noncoding | noncoding |
| MSTRG. 204731. 1 | MBP          | XLOC_210776 | 351 coding  | noncoding | noncoding | noncoding |
| XM_017025780. 2  | MBP          | XLOC_210777 | 4834 coding | coding    | coding    | coding    |
| MSTRG. 204559. 1 |              | XLOC_210801 | 283 coding  | noncoding | noncoding | noncoding |
| MSTRG. 204652. 1 |              | XLOC_210806 | 241 coding  | noncoding | noncoding | noncoding |
| MSTRG. 204653. 1 |              | XLOC_210809 | 201 coding  | noncoding | noncoding | noncoding |
| MSTRG. 204684. 1 |              | XLOC_210825 | 232 coding  | noncoding | noncoding | noncoding |
| MSTRG. 204862. 7 | ATP9B        | XLOC_210841 | 1895 coding | coding    | noncoding | noncoding |
| XR_001753515. 1  | LOC101927897 | XLOC_210852 | 8202 coding | noncoding | coding    | coding    |
| MSTRG. 204765. 1 |              | XLOC_210860 | 250 coding  | noncoding | noncoding | noncoding |
| MSTRG. 204858. 1 | PARD6G       | XLOC_210898 | 264 coding  | noncoding | noncoding | noncoding |
| MSTRG. 204859. 1 | PARD6G       | XLOC_210899 | 264 coding  | noncoding | noncoding | noncoding |
| MSTRG. 204887. 2 | LOC101928344 | XLOC_210908 | 5931 coding | coding    | coding    | noncoding |
| MSTRG. 204947. 1 | HCN2         | XLOC_210944 | 399 coding  | noncoding | noncoding | noncoding |
| MSTRG. 204961. 1 |              | XLOC_210955 | 255 coding  | noncoding | noncoding | noncoding |
| XR_001753829. 2  | LINC01836    | XLOC_210959 | 954 coding  | noncoding | noncoding | noncoding |
| XM_005259513. 5  | ARID3A       | XLOC_210973 | 6796 coding | coding    | coding    | coding    |
| NM_001303499. 2  | CNN2         | XLOC_210980 | 2116 coding | coding    | coding    | coding    |
| MSTRG. 205046. 1 | ABCA7        | XLOC_210982 | 231 coding  | noncoding | noncoding | noncoding |
| MSTRG. 205000. 1 | STK11        | XLOC_210990 | 234 coding  | noncoding | noncoding | noncoding |
| NR_023313. 2     | CIRBP        | XLOC_210997 | 3095 coding | coding    | coding    | coding    |
| NM_001369792. 1  | PWWP3A       | XLOC_211003 | 4513 coding | noncoding | coding    | coding    |
| MSTRG. 205078. 1 |              | XLOC_211013 | 325 coding  | noncoding | noncoding | noncoding |
| MSTRG. 205081. 1 | ADAMTSL5     | XLOC_211017 | 216 coding  | noncoding | noncoding | noncoding |
| MSTRG. 205073. 2 | UQCR11       | XLOC_211021 | 440 coding  | coding    | noncoding | noncoding |
| MSTRG. 205099. 2 | LOC100288123 | XLOC_211030 | 1785 coding | noncoding | coding    | noncoding |
| MSTRG. 205124. 1 |              | XLOC_211037 | 255 coding  | noncoding | noncoding | noncoding |
| NM_138422. 4     | ADAT3        | XLOC_211038 | 1599 coding | coding    | coding    | coding    |
| XM_005259501. 2  | CSNK1G2      | XLOC_211040 | 3367 coding | coding    | coding    | coding    |
| MSTRG. 205179. 8 | MOB3A        | XLOC_211050 | 3300 coding | coding    | coding    | coding    |
| MSTRG. 205148. 1 |              | XLOC_211054 | 259 coding  | noncoding | noncoding | noncoding |
| MSTRG. 205189. 1 |              | XLOC_211071 | 271 coding  | noncoding | noncoding | noncoding |
| MSTRG. 205202. 1 | TMPRSS9      | XLOC_211074 | 277 coding  | noncoding | noncoding | noncoding |
| MSTRG. 205198. 1 |              | XLOC_211078 | 345 coding  | noncoding | noncoding | noncoding |
| MSTRG. 205211. 1 |              | XLOC_211080 | 286 coding  | noncoding | noncoding | noncoding |
| MSTRG. 205215. 1 |              | XLOC_211081 | 232 coding  | noncoding | noncoding | noncoding |

|                  |           |             |             |           |           |           |
|------------------|-----------|-------------|-------------|-----------|-----------|-----------|
| MSTRG. 205230. 1 | GNG7      | XLOC_211088 | 258 coding  | noncoding | noncoding | noncoding |
| XM_011528228. 2  | THOP1     | XLOC_211111 | 3545 coding | coding    | coding    | coding    |
| MSTRG. 205263. 1 | ZNF554    | XLOC_211114 | 269 coding  | noncoding | noncoding | noncoding |
| MSTRG. 205301. 4 | TLE5      | XLOC_211132 | 1680 coding | coding    | coding    | noncoding |
| MSTRG. 205301. 3 | TLE5      | XLOC_211132 | 1796 coding | coding    | coding    | noncoding |
| NM_020170. 4     | NCLN      | XLOC_211149 | 3680 coding | coding    | coding    | coding    |
| MSTRG. 205331. 1 | NCLN      | XLOC_211152 | 282 coding  | noncoding | noncoding | noncoding |
| NM_001172673. 2  | CELF5     | XLOC_211153 | 5051 coding | coding    | coding    | coding    |
| MSTRG. 205342. 1 | CELF5     | XLOC_211158 | 263 coding  | noncoding | noncoding | noncoding |
| XM_017026834. 2  | NFIC      | XLOC_211161 | 2088 coding | coding    | coding    | coding    |
| MSTRG. 205374. 1 | FZR1      | XLOC_211172 | 268 coding  | noncoding | noncoding | noncoding |
| MSTRG. 205388. 1 | CACTIN    | XLOC_211181 | 285 coding  | noncoding | noncoding | noncoding |
| MSTRG. 205413. 1 | MATK      | XLOC_211192 | 222 coding  | noncoding | noncoding | noncoding |
| MSTRG. 205419. 1 | ZFR2      | XLOC_211193 | 256 coding  | noncoding | noncoding | noncoding |
| NM_033064. 5     | ATCAY     | XLOC_211196 | 4971 coding | coding    | coding    | coding    |
| MSTRG. 205416. 1 | ATCAY     | XLOC_211197 | 314 coding  | noncoding | noncoding | noncoding |
| MSTRG. 205446. 1 |           | XLOC_211211 | 300 coding  | noncoding | noncoding | noncoding |
| MSTRG. 205455. 1 | EBI3      | XLOC_211217 | 274 coding  | noncoding | noncoding | noncoding |
| MSTRG. 205466. 1 | YJU2      | XLOC_211219 | 279 coding  | noncoding | noncoding | noncoding |
| MSTRG. 205463. 1 | SHD       | XLOC_211221 | 232 coding  | noncoding | noncoding | noncoding |
| MSTRG. 205472. 1 |           | XLOC_211232 | 295 coding  | noncoding | noncoding | noncoding |
| MSTRG. 205502. 1 | PLIN4     | XLOC_211237 | 793 coding  | noncoding | coding    | noncoding |
| XM_005259487. 3  | TNFAIP8L1 | XLOC_211242 | 4493 coding | coding    | coding    | coding    |
| MSTRG. 205584. 1 | PTPRS     | XLOC_211264 | 487 coding  | coding    | coding    | noncoding |
| MSTRG. 205593. 1 | PTPRS     | XLOC_211271 | 267 coding  | noncoding | noncoding | noncoding |
| MSTRG. 205551. 1 |           | XLOC_211274 | 296 coding  | noncoding | noncoding | noncoding |
| MSTRG. 205553. 1 |           | XLOC_211275 | 235 coding  | noncoding | noncoding | noncoding |
| MSTRG. 205557. 1 |           | XLOC_211278 | 303 coding  | noncoding | noncoding | noncoding |
| MSTRG. 205636. 1 | CATSPERD  | XLOC_211301 | 321 coding  | noncoding | noncoding | noncoding |
| MSTRG. 205637. 1 | CATSPERD  | XLOC_211302 | 307 coding  | noncoding | noncoding | noncoding |
| MSTRG. 205638. 1 | CATSPERD  | XLOC_211303 | 300 coding  | noncoding | noncoding | noncoding |
| MSTRG. 205605. 1 | FUT6      | XLOC_211307 | 298 coding  | noncoding | noncoding | noncoding |
| MSTRG. 205720. 1 | VMAC      | XLOC_211314 | 251 coding  | noncoding | noncoding | noncoding |
| MSTRG. 205737. 1 | RFX2      | XLOC_211322 | 898 coding  | noncoding | coding    | noncoding |
| MSTRG. 205751. 1 | RFX2      | XLOC_211334 | 475 coding  | noncoding | noncoding | noncoding |
| MSTRG. 205655. 1 | MLLT1     | XLOC_211348 | 429 coding  | noncoding | noncoding | noncoding |
| MSTRG. 205669. 1 | ACER1     | XLOC_211360 | 369 coding  | coding    | noncoding | noncoding |
| MSTRG. 205693. 1 | TUBB4A    | XLOC_211371 | 250 coding  | noncoding | noncoding | noncoding |
| MSTRG. 205689. 1 |           | XLOC_211372 | 270 coding  | noncoding | noncoding | noncoding |
| MSTRG. 205691. 1 |           | XLOC_211373 | 281 coding  | noncoding | noncoding | noncoding |
| MSTRG. 205714. 1 | C3        | XLOC_211384 | 202 coding  | noncoding | noncoding | noncoding |
| MSTRG. 205716. 1 | C3        | XLOC_211385 | 292 coding  | noncoding | noncoding | noncoding |
| MSTRG. 205782. 1 | VAV1      | XLOC_211392 | 290 coding  | noncoding | noncoding | noncoding |

|                  |          |                   |             |           |           |           |
|------------------|----------|-------------------|-------------|-----------|-----------|-----------|
| MSTRG. 205783. 1 | VAV1     | XLOC_211393       | 333 coding  | noncoding | noncoding | noncoding |
| MSTRG. 205785. 1 | VAV1     | XLOC_211395       | 375 coding  | noncoding | noncoding | noncoding |
| MSTRG. 205778. 1 |          | XLOC_211398       | 253 coding  | noncoding | noncoding | noncoding |
| MSTRG. 205792. 1 |          | XLOC_211406       | 285 coding  | noncoding | noncoding | noncoding |
| MSTRG. 205803. 1 |          | XLOC_211410       | 414 coding  | noncoding | noncoding | noncoding |
| NM_001367823. 1  | ARHGEF18 | XLOC_211413       | 6681 coding | coding    | coding    | coding    |
| MSTRG. 205824. 1 | ARHGEF18 | XLOC_211416       | 240 coding  | noncoding | noncoding | noncoding |
| MSTRG. 205827. 1 | ARHGEF18 | XLOC_211419       | 207 coding  | noncoding | noncoding | noncoding |
| MSTRG. 205831. 1 | ARHGEF18 | XLOC_211421       | 275 coding  | noncoding | noncoding | noncoding |
| NM_001166111. 2  | PNPLA6   | XLOC_211425       | 4536 coding | coding    | coding    | coding    |
| MSTRG. 205816. 1 |          | XLOC_211426       | 250 coding  | noncoding | noncoding | noncoding |
| NR_002931. 2     | CLEC4GP1 | XLOC_211443       | 1935 coding | noncoding | coding    | coding    |
| MSTRG. 205890. 1 |          | XLOC_211457       | 299 coding  | noncoding | noncoding | noncoding |
| MSTRG. 205899. 1 | FBN3     | XLOC_211459       | 299 coding  | noncoding | noncoding | noncoding |
| MSTRG. 205906. 1 | FBN3     | XLOC_211464       | 307 coding  | noncoding | noncoding | noncoding |
| MSTRG. 205914. 1 |          | XLOC_211465       | 294 coding  | noncoding | noncoding | noncoding |
| MSTRG. 205918. 1 | CERS4    | XLOC_211468       | 302 coding  | noncoding | noncoding | noncoding |
| MSTRG. 205919. 1 | CERS4    | XLOC_211469       | 264 coding  | noncoding | noncoding | noncoding |
| MSTRG. 205925. 1 |          | XLOC_211481       | 253 coding  | noncoding | noncoding | noncoding |
| MSTRG. 205941. 1 | RAB11B   | XLOC_211486       | 224 coding  | noncoding | noncoding | noncoding |
| MSTRG. 205942. 1 | RAB11B   | XLOC_211487       | 294 coding  | noncoding | noncoding | noncoding |
| NM_001369776. 1  |          | 2-Mar XLOC_211488 | 2025 coding | coding    | coding    | coding    |
| MSTRG. 205946. 1 |          | XLOC_211500       | 254 coding  | noncoding | noncoding | noncoding |
| MSTRG. 205965. 1 |          | XLOC_211510       | 292 coding  | noncoding | noncoding | noncoding |
| MSTRG. 205980. 1 | ACTL9    | XLOC_211513       | 244 coding  | coding    | noncoding | noncoding |
| MSTRG. 206009. 1 | MUC16    | XLOC_211521       | 237 coding  | noncoding | noncoding | noncoding |
| MSTRG. 206013. 1 | MUC16    | XLOC_211524       | 283 coding  | noncoding | noncoding | noncoding |
| MSTRG. 206005. 1 |          | XLOC_211529       | 240 coding  | noncoding | noncoding | noncoding |
| MSTRG. 206006. 1 |          | XLOC_211531       | 311 coding  | noncoding | noncoding | noncoding |
| MSTRG. 206024. 1 |          | XLOC_211539       | 249 coding  | noncoding | noncoding | noncoding |
| MSTRG. 206019. 1 |          | XLOC_211543       | 267 coding  | noncoding | noncoding | noncoding |
| MSTRG. 206071. 1 |          | XLOC_211571       | 280 coding  | noncoding | noncoding | noncoding |
| MSTRG. 206122. 1 | OLFM2    | XLOC_211588       | 269 coding  | noncoding | noncoding | noncoding |
| MSTRG. 206130. 1 | COL5A3   | XLOC_211591       | 260 coding  | noncoding | noncoding | noncoding |
| MSTRG. 206160. 1 |          | XLOC_211603       | 342 coding  | noncoding | noncoding | noncoding |
| MSTRG. 206135. 1 | MIR4322  | XLOC_211608       | 274 coding  | noncoding | noncoding | noncoding |
| MSTRG. 206143. 1 | MRPL4    | XLOC_211610       | 229 coding  | noncoding | noncoding | noncoding |
| MSTRG. 206153. 1 | ICAM1    | XLOC_211614       | 293 coding  | noncoding | noncoding | noncoding |
| MSTRG. 206198. 1 |          | XLOC_211619       | 259 coding  | noncoding | noncoding | noncoding |
| MSTRG. 206200. 1 |          | XLOC_211620       | 227 coding  | noncoding | noncoding | noncoding |
| MSTRG. 206203. 5 | TYK2     | XLOC_211622       | 4178 coding | coding    | coding    | coding    |
| MSTRG. 206178. 1 | PDE4A    | XLOC_211626       | 307 coding  | noncoding | noncoding | noncoding |
| MSTRG. 206173. 1 |          | XLOC_211627       | 275 coding  | noncoding | noncoding | noncoding |

|                   |              |             |             |           |           |           |
|-------------------|--------------|-------------|-------------|-----------|-----------|-----------|
| MSTRG. 206175. 1  |              | XLOC_211628 | 224 coding  | noncoding | noncoding | noncoding |
| MSTRG. 206187. 1  |              | XLOC_211632 | 279 coding  | noncoding | noncoding | noncoding |
| MSTRG. 206233. 1  | DNM2         | XLOC_211646 | 317 coding  | noncoding | noncoding | noncoding |
| MSTRG. 206234. 1  | DNM2         | XLOC_211647 | 237 coding  | noncoding | noncoding | noncoding |
| MSTRG. 206238. 1  | DNM2         | XLOC_211651 | 291 coding  | noncoding | noncoding | noncoding |
| MSTRG. 206248. 1  |              | XLOC_211662 | 273 coding  | noncoding | noncoding | noncoding |
| MSTRG. 206253. 1  |              | XLOC_211665 | 238 coding  | noncoding | noncoding | noncoding |
| MSTRG. 206254. 1  |              | XLOC_211666 | 275 coding  | noncoding | noncoding | noncoding |
| NM_000527. 4      | LDLR         | XLOC_211667 | 5284 coding | coding    | coding    | coding    |
| MSTRG. 206271. 1  |              | XLOC_211670 | 269 coding  | noncoding | noncoding | noncoding |
| MSTRG. 206316. 1  | RGL3         | XLOC_211683 | 308 coding  | noncoding | noncoding | noncoding |
| MSTRG. 206321. 1  | ELAVL3       | XLOC_211686 | 208 coding  | noncoding | noncoding | noncoding |
| MSTRG. 206308. 4  | ELOF1        | XLOC_211693 | 1060 coding | coding    | noncoding | noncoding |
| MSTRG. 206308. 3  | ELOF1        | XLOC_211693 | 1054 coding | coding    | noncoding | noncoding |
| MSTRG. 206307. 1  |              | XLOC_211696 | 255 coding  | noncoding | noncoding | noncoding |
| XM_011527780. 2   | ZNF627       | XLOC_211698 | 2728 coding | coding    | coding    | coding    |
| MSTRG. 206310. 1  |              | XLOC_211701 | 206 coding  | noncoding | noncoding | noncoding |
| MSTRG. 206341. 1  |              | XLOC_211704 | 294 coding  | noncoding | noncoding | noncoding |
| MSTRG. 206350. 1  | ZNF441       | XLOC_211709 | 312 coding  | noncoding | noncoding | noncoding |
| XM_005259730. 4   | ZNF491       | XLOC_211710 | 3828 coding | coding    | coding    | coding    |
| MSTRG. 206392. 1  |              | XLOC_211716 | 275 coding  | noncoding | noncoding | noncoding |
| NM_001012753. 2   | ZNF763       | XLOC_211717 | 2871 coding | coding    | coding    | coding    |
| MSTRG. 206412. 1  | ZNF69        | XLOC_211725 | 269 coding  | noncoding | noncoding | noncoding |
| MSTRG. 206359. 1  |              | XLOC_211732 | 319 coding  | noncoding | noncoding | noncoding |
| MSTRG. 206375. 1  | LOC105372275 | XLOC_211737 | 249 coding  | noncoding | noncoding | noncoding |
| MSTRG. 206436. 1  | ZNF136       | XLOC_211740 | 321 coding  | noncoding | noncoding | noncoding |
| MSTRG. 206380. 1  |              | XLOC_211747 | 291 coding  | noncoding | noncoding | noncoding |
| MSTRG. 206454. 1  | ZNF563       | XLOC_211752 | 420 coding  | noncoding | noncoding | noncoding |
| MSTRG. 206456. 1  | ZNF442       | XLOC_211754 | 277 coding  | noncoding | noncoding | noncoding |
| MSTRG. 206457. 1  | ZNF442       | XLOC_211755 | 242 coding  | noncoding | noncoding | noncoding |
| MSTRG. 206473. 1  | LOC105372278 | XLOC_211770 | 318 coding  | noncoding | noncoding | noncoding |
| XM_017026412. 1   | ZNF791       | XLOC_211774 | 4524 coding | coding    | coding    | coding    |
| MSTRG. 206508. 1  | GET3         | XLOC_211785 | 220 coding  | noncoding | noncoding | noncoding |
| MSTRG. 206549. 1  | GADD45GIP1   | XLOC_211809 | 250 coding  | noncoding | noncoding | noncoding |
| MSTRG. 206566. 1  | CACNA1A      | XLOC_211822 | 254 coding  | noncoding | noncoding | noncoding |
| NR_138051. 1      | MRI1         | XLOC_211834 | 3211 coding | coding    | coding    | coding    |
| NR_134916. 1      | LINC01842    | XLOC_211858 | 765 coding  | noncoding | noncoding | noncoding |
| MSTRG. 206657. 1  | DNAJB1       | XLOC_211866 | 339 coding  | noncoding | noncoding | noncoding |
| MSTRG. 206701. 23 | ADGRE3       | XLOC_211871 | 3077 coding | coding    | coding    | coding    |
| MSTRG. 206663. 1  |              | XLOC_211874 | 248 coding  | noncoding | noncoding | noncoding |
| MSTRG. 206666. 1  | OR7A5        | XLOC_211875 | 304 coding  | noncoding | noncoding | noncoding |
| MSTRG. 206664. 1  |              | XLOC_211876 | 238 coding  | noncoding | noncoding | noncoding |
| MSTRG. 206670. 1  | OR7A17       | XLOC_211877 | 236 coding  | coding    | noncoding | noncoding |

|                  |              |             |              |           |           |           |
|------------------|--------------|-------------|--------------|-----------|-----------|-----------|
| MSTRG. 206682. 1 |              | XLOC_211886 | 282 coding   | noncoding | noncoding | noncoding |
| MSTRG. 206695. 2 | BRD4         | XLOC_211887 | 2220 coding  | coding    | coding    | coding    |
| MSTRG. 206738. 1 | CYP4F22      | XLOC_211905 | 225 coding   | noncoding | noncoding | noncoding |
| MSTRG. 206745. 1 |              | XLOC_211910 | 293 coding   | noncoding | noncoding | noncoding |
| MSTRG. 206753. 1 |              | XLOC_211922 | 242 coding   | noncoding | noncoding | noncoding |
| MSTRG. 206773. 1 | CYP4F2       | XLOC_211933 | 258 coding   | noncoding | noncoding | noncoding |
| NR_026828. 1     | LINC00661    | XLOC_211936 | 3342 coding  | noncoding | coding    | coding    |
| MSTRG. 206777. 1 |              | XLOC_211939 | 328 coding   | noncoding | noncoding | noncoding |
| NM_001367837. 2  | TPM4         | XLOC_211942 | 2216 coding  | coding    | coding    | coding    |
| NR_163150. 1     | HSB2D        | XLOC_211945 | 2904 coding  | noncoding | coding    | coding    |
| MSTRG. 206816. 1 | RAB8A        | XLOC_211947 | 220 coding   | noncoding | noncoding | noncoding |
| MSTRG. 206820. 1 | HSB2D        | XLOC_211948 | 267 coding   | noncoding | noncoding | noncoding |
| MSTRG. 206810. 1 | CIB3         | XLOC_211950 | 239 coding   | noncoding | noncoding | noncoding |
| NM_001130524. 2  | AP1M1        | XLOC_211952 | 12895 coding | coding    | coding    | coding    |
| MSTRG. 206830. 1 | AP1M1        | XLOC_211953 | 282 coding   | noncoding | noncoding | noncoding |
| MSTRG. 206824. 1 |              | XLOC_211956 | 250 coding   | noncoding | noncoding | noncoding |
| MSTRG. 206826. 1 |              | XLOC_211957 | 643 coding   | noncoding | noncoding | noncoding |
| MSTRG. 206825. 1 |              | XLOC_211958 | 272 coding   | noncoding | noncoding | noncoding |
| MSTRG. 206869. 1 |              | XLOC_211993 | 283 coding   | noncoding | noncoding | noncoding |
| MSTRG. 206870. 1 |              | XLOC_211994 | 235 coding   | noncoding | noncoding | noncoding |
| MSTRG. 206923. 1 | CPAMD8       | XLOC_212003 | 240 coding   | noncoding | noncoding | noncoding |
| MSTRG. 207001. 1 | LOC100507551 | XLOC_212042 | 227 coding   | noncoding | noncoding | noncoding |
| MSTRG. 206984. 1 |              | XLOC_212046 | 283 coding   | noncoding | noncoding | noncoding |
| MSTRG. 207005. 1 |              | XLOC_212053 | 337 coding   | noncoding | noncoding | noncoding |
| MSTRG. 207014. 1 |              | XLOC_212060 | 302 coding   | noncoding | noncoding | noncoding |
| MSTRG. 207029. 1 | KCNN1        | XLOC_212063 | 262 coding   | noncoding | noncoding | noncoding |
| MSTRG. 207078. 5 | IL12RB1      | XLOC_212069 | 817 coding   | noncoding | noncoding | noncoding |
| XM_017026511. 1  | MAST3        | XLOC_212071 | 6361 coding  | coding    | coding    | coding    |
| MSTRG. 207086. 1 | MAST3        | XLOC_212073 | 294 coding   | noncoding | noncoding | noncoding |
| MSTRG. 207052. 1 | PDE4C        | XLOC_212079 | 277 coding   | noncoding | noncoding | noncoding |
| MSTRG. 207053. 1 | PDE4C        | XLOC_212080 | 253 coding   | noncoding | noncoding | noncoding |
| MSTRG. 207060. 1 |              | XLOC_212087 | 218 coding   | noncoding | noncoding | noncoding |
| XM_017026432. 1  | SSBP4        | XLOC_212093 | 2783 coding  | coding    | coding    | coding    |
| MSTRG. 207100. 4 | FKBP8        | XLOC_212097 | 1707 coding  | coding    | coding    | coding    |
| MSTRG. 207100. 3 | FKBP8        | XLOC_212097 | 1792 coding  | coding    | coding    | noncoding |
| XM_011528273. 2  | KXD1         | XLOC_212098 | 1660 coding  | coding    | coding    | coding    |
| MSTRG. 207125. 1 |              | XLOC_212107 | 233 coding   | noncoding | noncoding | noncoding |
| MSTRG. 207131. 1 |              | XLOC_212114 | 235 coding   | noncoding | noncoding | noncoding |
| XM_017027105. 2  | UPF1         | XLOC_212116 | 5932 coding  | coding    | coding    | coding    |
| MSTRG. 207153. 1 |              | XLOC_212124 | 236 coding   | noncoding | noncoding | noncoding |
| MSTRG. 207235. 1 | GATAD2A      | XLOC_212151 | 402 coding   | noncoding | noncoding | noncoding |
| MSTRG. 207236. 1 | GATAD2A      | XLOC_212152 | 294 coding   | noncoding | noncoding | noncoding |
| MSTRG. 207237. 1 | GATAD2A      | XLOC_212153 | 267 coding   | noncoding | noncoding | noncoding |

|                 |              |             |             |           |           |           |
|-----------------|--------------|-------------|-------------|-----------|-----------|-----------|
| XM_005259903.4  | YJEFN3       | XLOC_212162 | 1364 coding | coding    | coding    | coding    |
| MSTRG.207258.6  | GMIP         | XLOC_212179 | 4971 coding | coding    | coding    | coding    |
| MSTRG.207282.1  | LINC00663    | XLOC_212187 | 283 coding  | noncoding | noncoding | noncoding |
| MSTRG.207294.1  |              | XLOC_212191 | 233 coding  | noncoding | noncoding | noncoding |
| MSTRG.207269.1  |              | XLOC_212196 | 276 coding  | noncoding | noncoding | noncoding |
| MSTRG.207277.1  |              | XLOC_212213 | 256 coding  | noncoding | noncoding | noncoding |
| MSTRG.207337.1  | LOC105372310 | XLOC_212221 | 208 coding  | noncoding | noncoding | noncoding |
| MSTRG.207350.1  | LOC105372310 | XLOC_212229 | 220 coding  | noncoding | noncoding | noncoding |
| XR_936407.2     | LOC105372314 | XLOC_212231 | 2830 coding | coding    | coding    | noncoding |
| MSTRG.207380.1  |              | XLOC_212245 | 230 coding  | noncoding | noncoding | noncoding |
| MSTRG.207394.1  |              | XLOC_212253 | 270 coding  | noncoding | noncoding | noncoding |
| XR_001753620.1  | ZNF431       | XLOC_212277 | 5011 coding | coding    | coding    | coding    |
| MSTRG.207562.1  |              | XLOC_212281 | 244 coding  | noncoding | noncoding | noncoding |
| MSTRG.207594.1  |              | XLOC_212298 | 270 coding  | noncoding | noncoding | noncoding |
| MSTRG.207419.1  |              | XLOC_212304 | 309 coding  | noncoding | noncoding | noncoding |
| XM_017026752.1  | ZNF429       | XLOC_212306 | 5297 coding | coding    | coding    | coding    |
| MSTRG.207499.1  | ZNF257       | XLOC_212340 | 281 coding  | noncoding | noncoding | noncoding |
| NM_001242680.2  | ZNF729       | XLOC_212343 | 3844 coding | coding    | coding    | coding    |
| MSTRG.207527.1  |              | XLOC_212353 | 240 coding  | noncoding | noncoding | noncoding |
| MSTRG.207529.1  |              | XLOC_212354 | 282 coding  | noncoding | noncoding | noncoding |
| XM_017026115.2  | ZNF730       | XLOC_212360 | 3116 coding | coding    | coding    | coding    |
| MSTRG.207550.1  | ZNF730       | XLOC_212362 | 281 coding  | noncoding | noncoding | noncoding |
| MSTRG.207640.1  |              | XLOC_212367 | 283 coding  | noncoding | noncoding | noncoding |
| MSTRG.207649.9  | ZNF91        | XLOC_212374 | 3837 coding | coding    | noncoding | noncoding |
| MSTRG.207649.10 | ZNF91        | XLOC_212374 | 3598 coding | coding    | noncoding | noncoding |
| MSTRG.207600.1  |              | XLOC_212380 | 235 coding  | noncoding | noncoding | noncoding |
| MSTRG.207706.1  | RPSAP58      | XLOC_212391 | 213 coding  | noncoding | noncoding | noncoding |
| MSTRG.207714.1  |              | XLOC_212398 | 423 coding  | noncoding | noncoding | noncoding |
| MSTRG.207716.1  |              | XLOC_212400 | 230 coding  | coding    | noncoding | noncoding |
| MSTRG.207776.1  | LOC100420587 | XLOC_212462 | 232 coding  | noncoding | noncoding | noncoding |
| MSTRG.207830.1  |              | XLOC_212485 | 285 coding  | noncoding | noncoding | noncoding |
| MSTRG.207855.1  | LOC284395    | XLOC_212502 | 299 coding  | noncoding | noncoding | noncoding |
| MSTRG.207865.1  | PLEKHF1      | XLOC_212508 | 239 coding  | noncoding | noncoding | noncoding |
| MSTRG.207874.1  |              | XLOC_212514 | 269 coding  | noncoding | noncoding | noncoding |
| MSTRG.207881.1  |              | XLOC_212517 | 266 coding  | noncoding | noncoding | noncoding |
| MSTRG.207897.1  |              | XLOC_212541 | 200 coding  | noncoding | noncoding | noncoding |
| MSTRG.207902.1  |              | XLOC_212555 | 308 coding  | noncoding | noncoding | noncoding |
| MSTRG.207915.1  | LOC105372356 | XLOC_212564 | 445 coding  | noncoding | noncoding | noncoding |
| MSTRG.207911.1  | LOC105372358 | XLOC_212565 | 434 coding  | noncoding | noncoding | noncoding |
| MSTRG.207961.1  |              | XLOC_212593 | 280 coding  | noncoding | noncoding | noncoding |
| MSTRG.207978.1  |              | XLOC_212609 | 315 coding  | noncoding | noncoding | noncoding |
| MSTRG.208076.1  | SLC7A9       | XLOC_212637 | 292 coding  | noncoding | noncoding | noncoding |
| MSTRG.208087.1  | CEP89        | XLOC_212640 | 279 coding  | noncoding | noncoding | noncoding |

|                   |              |             |             |           |           |           |
|-------------------|--------------|-------------|-------------|-----------|-----------|-----------|
| MSTRG. 208094. 1  | CEP89        | XLOC_212646 | 220 coding  | noncoding | noncoding | noncoding |
| MSTRG. 208105. 1  | RHPN2        | XLOC_212652 | 303 coding  | noncoding | noncoding | noncoding |
| MSTRG. 208129. 1  |              | XLOC_212671 | 242 coding  | coding    | noncoding | noncoding |
| MSTRG. 208134. 1  |              | XLOC_212674 | 313 coding  | noncoding | noncoding | noncoding |
| MSTRG. 208158. 1  |              | XLOC_212685 | 210 coding  | noncoding | noncoding | noncoding |
| NM_001289181. 1   | ZNF302       | XLOC_212734 | 2778 coding | coding    | coding    | coding    |
| MSTRG. 208202. 1  |              | XLOC_212737 | 235 coding  | coding    | noncoding | noncoding |
| NR_024018. 1      | ZNF30        | XLOC_212757 | 2664 coding | coding    | coding    | coding    |
| XM_011527155. 1   | GRAMD1A      | XLOC_212763 | 2915 coding | coding    | coding    | coding    |
| MSTRG. 208287. 1  | GRAMD1A      | XLOC_212765 | 278 coding  | noncoding | noncoding | noncoding |
| NM_199037. 5      | SCN1B        | XLOC_212766 | 4780 coding | coding    | coding    | coding    |
| NM_005303. 2      | FFAR1        | XLOC_212789 | 923 coding  | coding    | coding    | coding    |
| XM_017026711. 1   | FFAR2        | XLOC_212803 | 2227 coding | coding    | coding    | coding    |
| MSTRG. 208332. 1  |              | XLOC_212806 | 298 coding  | noncoding | noncoding | noncoding |
| MSTRG. 208346. 1  | SBSN         | XLOC_212808 | 269 coding  | noncoding | noncoding | noncoding |
| MSTRG. 208355. 1  |              | XLOC_212811 | 243 coding  | noncoding | noncoding | noncoding |
| MSTRG. 208400. 1  |              | XLOC_212837 | 280 coding  | noncoding | noncoding | noncoding |
| MSTRG. 208423. 15 | WDR62        | XLOC_212842 | 256 coding  | noncoding | noncoding | noncoding |
| MSTRG. 208424. 1  | WDR62        | XLOC_212843 | 288 coding  | noncoding | noncoding | noncoding |
| MSTRG. 208443. 1  |              | XLOC_212851 | 268 coding  | noncoding | noncoding | noncoding |
| NM_001099638. 1   | ZNF146       | XLOC_212854 | 3783 coding | coding    | coding    | coding    |
| MSTRG. 208449. 1  | ZNF565       | XLOC_212856 | 264 coding  | noncoding | noncoding | noncoding |
| NM_001294306. 1   | LOC728485    | XLOC_212888 | 1885 coding | noncoding | coding    | coding    |
| MSTRG. 208555. 1  | ZNF790-AS1   | XLOC_212890 | 256 coding  | noncoding | noncoding | noncoding |
| MSTRG. 208598. 1  | ZNF568       | XLOC_212905 | 244 coding  | noncoding | noncoding | noncoding |
| NM_001345948. 2   | ZNF383       | XLOC_212920 | 6672 coding | coding    | coding    | coding    |
| NM_152604. 2      | ZNF383       | XLOC_212920 | 1946 coding | coding    | coding    | coding    |
| MSTRG. 208603. 1  | ZNF527       | XLOC_212931 | 302 coding  | noncoding | noncoding | noncoding |
| MSTRG. 208683. 1  | LOC100631378 | XLOC_212973 | 307 coding  | noncoding | noncoding | noncoding |
| NM_021102. 4      | SPINT2       | XLOC_212988 | 1688 coding | coding    | coding    | coding    |
| MSTRG. 208745. 7  | RYR1         | XLOC_212997 | 517 coding  | noncoding | coding    | noncoding |
| MSTRG. 208750. 1  | RYR1         | XLOC_212998 | 306 coding  | noncoding | noncoding | noncoding |
| MSTRG. 208770. 1  |              | XLOC_213013 | 263 coding  | noncoding | noncoding | noncoding |
| MSTRG. 208771. 1  |              | XLOC_213014 | 274 coding  | noncoding | noncoding | noncoding |
| MSTRG. 208772. 1  |              | XLOC_213015 | 241 coding  | noncoding | noncoding | noncoding |
| MSTRG. 208782. 1  |              | XLOC_213019 | 238 coding  | noncoding | noncoding | noncoding |
| XM_011527060. 3   | SAMD4B       | XLOC_213031 | 3735 coding | coding    | coding    | coding    |
| MSTRG. 208829. 1  |              | XLOC_213050 | 269 coding  | noncoding | noncoding | noncoding |
| MSTRG. 208859. 1  | LGALS17A     | XLOC_213055 | 243 coding  | noncoding | noncoding | noncoding |
| MSTRG. 208879. 2  | FBL          | XLOC_213064 | 1033 coding | coding    | coding    | coding    |
| MSTRG. 208888. 1  |              | XLOC_213080 | 352 coding  | noncoding | noncoding | noncoding |
| MSTRG. 208934. 1  | C19orf47     | XLOC_213091 | 238 coding  | noncoding | noncoding | noncoding |
| MSTRG. 208918. 4  | BLVRB        | XLOC_213097 | 822 coding  | coding    | coding    | noncoding |

|                  |              |             |             |           |           |           |
|------------------|--------------|-------------|-------------|-----------|-----------|-----------|
| MSTRG. 208918. 3 | BLVRB        | XLOC_213097 | 823 coding  | coding    | coding    | noncoding |
| XM_017027049. 1  | SPTBN4       | XLOC_213100 | 8940 coding | coding    | noncoding | coding    |
| MSTRG. 208952. 1 | SPTBN4       | XLOC_213102 | 250 coding  | noncoding | noncoding | noncoding |
| MSTRG. 208957. 1 | SPTBN4       | XLOC_213105 | 216 coding  | noncoding | noncoding | noncoding |
| MSTRG. 208958. 1 | SPTBN4       | XLOC_213106 | 302 coding  | noncoding | noncoding | noncoding |
| MSTRG. 208960. 8 | SHKBP1       | XLOC_213107 | 442 coding  | noncoding | coding    | noncoding |
| MSTRG. 209025. 1 | SNRPA        | XLOC_213121 | 273 coding  | noncoding | noncoding | noncoding |
| MSTRG. 208981. 1 |              | XLOC_213125 | 299 coding  | noncoding | noncoding | noncoding |
| MSTRG. 208962. 1 |              | XLOC_213127 | 268 coding  | noncoding | noncoding | noncoding |
| NR_001278. 1     | CYP2B7P      | XLOC_213129 | 2910 coding | coding    | coding    | coding    |
| MSTRG. 208971. 1 |              | XLOC_213132 | 277 coding  | noncoding | noncoding | noncoding |
| MSTRG. 208987. 1 |              | XLOC_213133 | 252 coding  | noncoding | noncoding | noncoding |
| MSTRG. 208993. 1 |              | XLOC_213136 | 310 coding  | coding    | noncoding | noncoding |
| MSTRG. 208996. 1 |              | XLOC_213138 | 241 coding  | noncoding | noncoding | noncoding |
| XM_017026384. 2  | CYP2F1       | XLOC_213139 | 2051 coding | coding    | coding    | coding    |
| NM_001278599. 1  | AXL          | XLOC_213143 | 4120 coding | coding    | coding    | coding    |
| XM_005258459. 4  | HNRNPUL1     | XLOC_213144 | 3789 coding | coding    | coding    | coding    |
| XM_024451763. 1  | CEACAM21     | XLOC_213170 | 3032 coding | coding    | coding    | coding    |
| MSTRG. 209138. 1 | GRIK5        | XLOC_213208 | 546 coding  | noncoding | noncoding | noncoding |
| MSTRG. 209139. 1 | GRIK5        | XLOC_213209 | 291 coding  | noncoding | noncoding | noncoding |
| MSTRG. 209141. 1 | GRIK5        | XLOC_213211 | 293 coding  | noncoding | noncoding | noncoding |
| MSTRG. 209143. 1 | GRIK5        | XLOC_213213 | 246 coding  | noncoding | noncoding | noncoding |
| MSTRG. 209149. 1 |              | XLOC_213252 | 299 coding  | noncoding | noncoding | noncoding |
| XM_005258674. 2  | CIC          | XLOC_213253 | 5558 coding | coding    | coding    | coding    |
| MSTRG. 209184. 1 | PSG8         | XLOC_213277 | 223 coding  | noncoding | noncoding | noncoding |
| MSTRG. 209187. 1 | PSG8         | XLOC_213279 | 306 coding  | noncoding | noncoding | noncoding |
| MSTRG. 209195. 1 |              | XLOC_213289 | 281 coding  | noncoding | noncoding | noncoding |
| MSTRG. 209199. 1 | PSG11        | XLOC_213290 | 296 coding  | noncoding | noncoding | noncoding |
| MSTRG. 209252. 1 | PSG9         | XLOC_213298 | 303 coding  | noncoding | noncoding | noncoding |
| MSTRG. 209314. 1 |              | XLOC_213301 | 297 coding  | noncoding | noncoding | noncoding |
| MSTRG. 209305. 1 |              | XLOC_213306 | 217 coding  | noncoding | noncoding | noncoding |
| MSTRG. 209344. 1 |              | XLOC_213328 | 258 coding  | noncoding | noncoding | noncoding |
| MSTRG. 209347. 1 |              | XLOC_213329 | 494 coding  | noncoding | noncoding | noncoding |
| XM_017027562. 1  | LOC105372412 | XLOC_213330 | 2284 coding | coding    | coding    | coding    |
| MSTRG. 209370. 1 |              | XLOC_213339 | 230 coding  | noncoding | noncoding | noncoding |
| MSTRG. 209379. 1 |              | XLOC_213343 | 263 coding  | noncoding | noncoding | noncoding |
| MSTRG. 209399. 1 |              | XLOC_213348 | 334 coding  | noncoding | noncoding | noncoding |
| MSTRG. 209415. 1 |              | XLOC_213356 | 310 coding  | noncoding | noncoding | noncoding |
| XM_011527286. 2  | ZNF225       | XLOC_213365 | 5142 coding | coding    | coding    | coding    |
| XM_017026152. 1  | ZNF234       | XLOC_213369 | 3037 coding | coding    | coding    | coding    |
| MSTRG. 209405. 1 | ZNF234       | XLOC_213370 | 218 coding  | noncoding | noncoding | noncoding |
| NM_001289172. 1  | ZNF227       | XLOC_213375 | 2968 coding | coding    | coding    | coding    |
| NM_006505. 5     | PVR          | XLOC_213411 | 5792 coding | coding    | coding    | coding    |

|                   |              |             |             |           |           |           |
|-------------------|--------------|-------------|-------------|-----------|-----------|-----------|
| MSTRG. 209480. 1  | LOC107985305 | XLOC_213412 | 267 coding  | noncoding | noncoding | noncoding |
| MSTRG. 209499. 1  | BCL3         | XLOC_213420 | 265 coding  | noncoding | noncoding | noncoding |
| MSTRG. 209555. 1  | RELB         | XLOC_213435 | 219 coding  | noncoding | noncoding | noncoding |
| MSTRG. 209584. 1  | BLOC1S3      | XLOC_213448 | 417 coding  | noncoding | noncoding | noncoding |
| NM_031417. 4      | MARK4        | XLOC_213450 | 5231 coding | coding    | coding    | coding    |
| MSTRG. 209592. 1  | MARK4        | XLOC_213452 | 252 coding  | noncoding | noncoding | noncoding |
| MSTRG. 209593. 1  | MARK4        | XLOC_213453 | 233 coding  | noncoding | noncoding | noncoding |
| MSTRG. 209613. 1  | PPP1R13L     | XLOC_213459 | 260 coding  | noncoding | noncoding | noncoding |
| XM_017026586. 1   | GIPR         | XLOC_213475 | 2794 coding | coding    | coding    | coding    |
| MSTRG. 209643. 1  | BHMG1        | XLOC_213482 | 275 coding  | noncoding | noncoding | noncoding |
| MSTRG. 209662. 1  | DMWD         | XLOC_213487 | 294 coding  | noncoding | noncoding | noncoding |
| MSTRG. 209654. 1  |              | XLOC_213489 | 224 coding  | noncoding | noncoding | noncoding |
| MSTRG. 209665. 1  | FOXA3        | XLOC_213492 | 292 coding  | noncoding | noncoding | noncoding |
| MSTRG. 209668. 1  |              | XLOC_213496 | 218 coding  | noncoding | noncoding | noncoding |
| MSTRG. 209723. 1  | PNMA8B       | XLOC_213509 | 230 coding  | coding    | noncoding | noncoding |
| MSTRG. 209725. 1  | PPP5D1       | XLOC_213510 | 229 coding  | noncoding | noncoding | noncoding |
| MSTRG. 209740. 1  | DACT3        | XLOC_213516 | 234 coding  | noncoding | noncoding | noncoding |
| MSTRG. 209755. 1  | SLC1A5       | XLOC_213522 | 874 coding  | coding    | coding    | coding    |
| MSTRG. 209768. 1  | ARHGAP35     | XLOC_213532 | 226 coding  | noncoding | noncoding | noncoding |
| MSTRG. 209785. 1  | SAE1         | XLOC_213541 | 259 coding  | noncoding | noncoding | noncoding |
| XM_011527550. 2   | DHX34        | XLOC_213556 | 4972 coding | coding    | coding    | coding    |
| MSTRG. 209810. 1  | MEIS3        | XLOC_213561 | 266 coding  | noncoding | noncoding | noncoding |
| NM_014601. 4      | EHD2         | XLOC_213574 | 3506 coding | coding    | coding    | coding    |
| MSTRG. 209840. 1  |              | XLOC_213579 | 254 coding  | noncoding | noncoding | noncoding |
| MSTRG. 209846. 1  |              | XLOC_213580 | 319 coding  | noncoding | noncoding | noncoding |
| MSTRG. 209847. 1  |              | XLOC_213582 | 315 coding  | noncoding | noncoding | noncoding |
| MSTRG. 209851. 1  | SULT2A1      | XLOC_213583 | 279 coding  | noncoding | noncoding | noncoding |
| NM_022142. 5      | ELSPBP1      | XLOC_213596 | 1079 coding | coding    | coding    | coding    |
| MSTRG. 209879. 2  | CABP5        | XLOC_213597 | 547 coding  | coding    | noncoding | noncoding |
| MSTRG. 209884. 1  | PLA2G4C      | XLOC_213601 | 225 coding  | noncoding | noncoding | noncoding |
| MSTRG. 209963. 23 | CARD8-AS1    | XLOC_213614 | 3916 coding | coding    | coding    | noncoding |
| MSTRG. 209963. 34 | CARD8        | XLOC_213614 | 1740 coding | coding    | coding    | noncoding |
| MSTRG. 209907. 1  | CCDC114      | XLOC_213617 | 295 coding  | noncoding | noncoding | noncoding |
| MSTRG. 209940. 1  | GRIN2D       | XLOC_213629 | 248 coding  | noncoding | noncoding | noncoding |
| MSTRG. 209945. 1  | KCNJ14       | XLOC_213631 | 289 coding  | noncoding | noncoding | noncoding |
| XR_001753791. 1   | CYTH2        | XLOC_213632 | 4534 coding | coding    | coding    | coding    |
| MSTRG. 209925. 1  | CYTH2        | XLOC_213633 | 246 coding  | noncoding | noncoding | noncoding |
| MSTRG. 209934. 1  | LMTK3        | XLOC_213636 | 229 coding  | coding    | noncoding | noncoding |
| MSTRG. 209926. 1  |              | XLOC_213638 | 245 coding  | noncoding | noncoding | noncoding |
| NM_004605. 2      | SULT2B1      | XLOC_213640 | 1253 coding | coding    | coding    | coding    |
| MSTRG. 209977. 1  | FAM83E       | XLOC_213642 | 343 coding  | noncoding | noncoding | noncoding |
| MSTRG. 209959. 1  | NTN5         | XLOC_213648 | 259 coding  | noncoding | noncoding | noncoding |
| MSTRG. 209954. 1  | FUT2         | XLOC_213651 | 227 coding  | noncoding | noncoding | noncoding |

|                  |              |             |             |           |           |           |
|------------------|--------------|-------------|-------------|-----------|-----------|-----------|
| MSTRG. 209986. 1 | IZUMO1       | XLOC_213652 | 233 coding  | noncoding | noncoding | noncoding |
| MSTRG. 209972. 1 | PLEKHA4      | XLOC_213658 | 240 coding  | noncoding | noncoding | noncoding |
| XM_017026598. 1  | DHDH         | XLOC_213663 | 1641 coding | coding    | coding    | coding    |
| MSTRG. 210007. 1 | RUVBL2       | XLOC_213668 | 268 coding  | noncoding | noncoding | noncoding |
| MSTRG. 210009. 1 | RUVBL2       | XLOC_213670 | 284 coding  | noncoding | noncoding | noncoding |
| NM_001301069. 2  | SNRNP70      | XLOC_213674 | 1644 coding | coding    | coding    | coding    |
| NM_017636. 4     | TRPM4        | XLOC_213678 | 4058 coding | coding    | coding    | coding    |
| NR_033397. 4     | PRMT1        | XLOC_213727 | 1568 coding | coding    | coding    | coding    |
| MSTRG. 210144. 1 | AP2A1        | XLOC_213734 | 236 coding  | noncoding | noncoding | noncoding |
| MSTRG. 210157. 1 | PTOV1        | XLOC_213741 | 3299 coding | coding    | coding    | noncoding |
| MSTRG. 210130. 1 |              | XLOC_213749 | 218 coding  | noncoding | noncoding | noncoding |
| MSTRG. 210165. 1 | LOC400710    | XLOC_213758 | 496 coding  | noncoding | noncoding | noncoding |
| MSTRG. 210163. 1 |              | XLOC_213759 | 240 coding  | noncoding | noncoding | noncoding |
| MSTRG. 210170. 1 |              | XLOC_213762 | 252 coding  | noncoding | noncoding | noncoding |
| NM_001145809. 2  | MYH14        | XLOC_213764 | 6914 coding | coding    | coding    | coding    |
| MSTRG. 210185. 1 | MYH14        | XLOC_213765 | 217 coding  | noncoding | noncoding | noncoding |
| MSTRG. 210186. 1 | MYH14        | XLOC_213766 | 464 coding  | noncoding | noncoding | noncoding |
| MSTRG. 210217. 1 |              | XLOC_213786 | 230 coding  | noncoding | noncoding | noncoding |
| MSTRG. 210234. 1 |              | XLOC_213798 | 247 coding  | noncoding | noncoding | noncoding |
| MSTRG. 210235. 1 |              | XLOC_213799 | 207 coding  | noncoding | noncoding | noncoding |
| MSTRG. 210244. 1 |              | XLOC_213801 | 278 coding  | noncoding | noncoding | noncoding |
| XM_005258799. 5  | SIGLECL1     | XLOC_213822 | 2005 coding | noncoding | coding    | coding    |
| MSTRG. 210277. 1 | VSIG10L      | XLOC_213828 | 262 coding  | noncoding | noncoding | noncoding |
| XM_017027249. 2  | ZNF175       | XLOC_213848 | 3799 coding | coding    | coding    | coding    |
| MSTRG. 210350. 2 | SIGLEC5      | XLOC_213854 | 1809 coding | coding    | coding    | noncoding |
| MSTRG. 210358. 1 | SPACA6       | XLOC_213859 | 269 coding  | noncoding | noncoding | noncoding |
| MSTRG. 210361. 1 |              | XLOC_213863 | 233 coding  | noncoding | noncoding | noncoding |
| MSTRG. 210372. 1 | ZNF577       | XLOC_213866 | 210 coding  | noncoding | noncoding | noncoding |
| MSTRG. 210423. 3 | ZNF841       | XLOC_213886 | 991 coding  | coding    | noncoding | noncoding |
| MSTRG. 210389. 1 |              | XLOC_213893 | 293 coding  | noncoding | noncoding | noncoding |
| MSTRG. 210395. 1 | LOC105372449 | XLOC_213902 | 257 coding  | coding    | noncoding | noncoding |
| XM_017027440. 1  | ZNF766       | XLOC_213903 | 2846 coding | coding    | noncoding | coding    |
| MSTRG. 210444. 1 | ZNF480       | XLOC_213906 | 588 coding  | noncoding | noncoding | noncoding |
| XM_011527394. 2  | ZNF528       | XLOC_213911 | 4098 coding | coding    | coding    | coding    |
| XR_935832. 3     | ZNF808       | XLOC_213914 | 4228 coding | coding    | coding    | coding    |
| XM_024451508. 1  | ZNF808       | XLOC_213914 | 3920 coding | coding    | coding    | coding    |
| MSTRG. 210558. 9 | ZNF611       | XLOC_213924 | 1650 coding | coding    | noncoding | noncoding |
| MSTRG. 210569. 1 |              | XLOC_213928 | 271 coding  | noncoding | noncoding | noncoding |
| MSTRG. 210577. 1 | ZNF320       | XLOC_213935 | 220 coding  | noncoding | noncoding | noncoding |
| NM_152473. 2     | ERVV-1       | XLOC_213946 | 2490 coding | coding    | coding    | coding    |
| MSTRG. 210453. 1 |              | XLOC_213963 | 443 coding  | noncoding | noncoding | noncoding |
| XM_024451583. 1  | ZNF331       | XLOC_213973 | 6307 coding | coding    | coding    | coding    |
| MSTRG. 210603. 1 | ZNF331       | XLOC_213974 | 239 coding  | noncoding | noncoding | noncoding |

|                  |              |             |             |           |           |           |
|------------------|--------------|-------------|-------------|-----------|-----------|-----------|
| MSTRG. 210492. 1 | MIR516B2     | XLOC_214012 | 303 coding  | noncoding | noncoding | noncoding |
| MSTRG. 210493. 1 | MIR519A1     | XLOC_214024 | 275 coding  | noncoding | noncoding | noncoding |
| MSTRG. 210514. 5 | NLRP12       | XLOC_214035 | 4357 coding | coding    | coding    | coding    |
| NM_001290188. 2  | MYADM        | XLOC_214036 | 3104 coding | coding    | coding    | coding    |
| MSTRG. 210637. 4 | LILRB2       | XLOC_214058 | 577 coding  | noncoding | noncoding | noncoding |
| NR_103502. 1     | LILRA1       | XLOC_214068 | 2162 coding | coding    | coding    | noncoding |
| MSTRG. 210674. 3 | PPP6R1       | XLOC_214094 | 367 coding  | noncoding | noncoding | noncoding |
| XM_024451742. 1  | KMT5C        | XLOC_214101 | 2664 coding | coding    | coding    | coding    |
| MSTRG. 210715. 1 | LOC105372462 | XLOC_214107 | 277 coding  | noncoding | noncoding | noncoding |
| MSTRG. 210720. 1 | SBK2         | XLOC_214114 | 393 coding  | noncoding | noncoding | noncoding |
| MSTRG. 210722. 1 |              | XLOC_214115 | 285 coding  | noncoding | noncoding | noncoding |
| MSTRG. 210756. 1 | NLRP11       | XLOC_214136 | 294 coding  | noncoding | noncoding | noncoding |
| MSTRG. 210752. 1 | NLRP13       | XLOC_214139 | 309 coding  | noncoding | noncoding | noncoding |
| NM_153447. 4     | NLRP5        | XLOC_214142 | 3885 coding | coding    | coding    | coding    |
| MSTRG. 210763. 1 | NLRP5        | XLOC_214143 | 244 coding  | noncoding | noncoding | noncoding |
| MSTRG. 210892. 1 | ZIM2         | XLOC_214216 | 393 coding  | noncoding | noncoding | noncoding |
| MSTRG. 210882. 1 |              | XLOC_214227 | 202 coding  | noncoding | noncoding | noncoding |
| MSTRG. 210898. 1 | ZNF264       | XLOC_214233 | 434 coding  | noncoding | noncoding | noncoding |
| XM_011526767. 3  | ZIK1         | XLOC_214265 | 4748 coding | coding    | coding    | coding    |
| MSTRG. 210999. 1 |              | XLOC_214281 | 240 coding  | noncoding | noncoding | noncoding |
| MSTRG. 211012. 1 | C19orf18     | XLOC_214310 | 359 coding  | noncoding | noncoding | noncoding |
| MSTRG. 211047. 1 |              | XLOC_214333 | 234 coding  | noncoding | noncoding | noncoding |
| XR_002958439. 1  | LOC101928344 | XLOC_214384 | 2013 coding | coding    | coding    | noncoding |
| MSTRG. 204900. 1 |              | XLOC_214390 | 435 coding  | noncoding | noncoding | noncoding |
| MSTRG. 204948. 1 | HCN2         | XLOC_214407 | 399 coding  | noncoding | noncoding | noncoding |
| NM_214710. 5     | PRSS57       | XLOC_214415 | 1044 coding | coding    | coding    | coding    |
| MSTRG. 204984. 5 | R3HDM4       | XLOC_214427 | 1566 coding | coding    | coding    | coding    |
| MSTRG. 204984. 4 | R3HDM4       | XLOC_214427 | 1545 coding | coding    | coding    | coding    |
| MSTRG. 205049. 3 | POLR2E       | XLOC_214439 | 7263 coding | coding    | coding    | coding    |
| MSTRG. 205010. 1 |              | XLOC_214456 | 257 coding  | noncoding | noncoding | noncoding |
| MSTRG. 205061. 1 | APC2         | XLOC_214466 | 287 coding  | noncoding | noncoding | noncoding |
| XR_002958347. 1  | TCF3         | XLOC_214474 | 4602 coding | coding    | coding    | coding    |
| MSTRG. 205084. 1 |              | XLOC_214479 | 305 coding  | noncoding | noncoding | noncoding |
| XR_001753839. 1  | LOC101928543 | XLOC_214481 | 2312 coding | coding    | coding    | noncoding |
| XM_006722655. 3  | ATP8B3       | XLOC_214482 | 5211 coding | coding    | coding    | coding    |
| MSTRG. 205109. 1 |              | XLOC_214490 | 252 coding  | noncoding | noncoding | noncoding |
| MSTRG. 205112. 1 | ABHD17A      | XLOC_214491 | 297 coding  | noncoding | noncoding | noncoding |
| MSTRG. 205127. 1 | SCAMP4       | XLOC_214495 | 1496 coding | coding    | coding    | noncoding |
| NR_033400. 1     | CSNK1G2-AS1  | XLOC_214504 | 1313 coding | noncoding | coding    | noncoding |
| MSTRG. 205119. 1 | BTBD2        | XLOC_214505 | 266 coding  | noncoding | noncoding | noncoding |
| MSTRG. 205118. 1 | MKNK2        | XLOC_214510 | 265 coding  | noncoding | noncoding | noncoding |
| MSTRG. 205175. 1 | LINGO3       | XLOC_214533 | 816 coding  | noncoding | noncoding | noncoding |
| MSTRG. 205188. 1 |              | XLOC_214541 | 271 coding  | noncoding | noncoding | noncoding |

|                  |          |             |             |           |           |           |
|------------------|----------|-------------|-------------|-----------|-----------|-----------|
| MSTRG. 205190. 1 |          | XLOC_214542 | 300 coding  | noncoding | noncoding | noncoding |
| MSTRG. 205199. 1 |          | XLOC_214548 | 226 coding  | noncoding | noncoding | noncoding |
| MSTRG. 205210. 1 |          | XLOC_214550 | 286 coding  | noncoding | noncoding | noncoding |
| MSTRG. 205212. 1 |          | XLOC_214551 | 298 coding  | noncoding | noncoding | noncoding |
| MSTRG. 205233. 1 | GNG7     | XLOC_214554 | 251 coding  | noncoding | noncoding | noncoding |
| MSTRG. 205252. 1 | GNG7     | XLOC_214559 | 263 coding  | noncoding | noncoding | noncoding |
| MSTRG. 205257. 1 |          | XLOC_214567 | 232 coding  | noncoding | noncoding | noncoding |
| MSTRG. 205264. 1 |          | XLOC_214569 | 298 coding  | noncoding | noncoding | noncoding |
| MSTRG. 205282. 1 |          | XLOC_214577 | 252 coding  | noncoding | noncoding | noncoding |
| MSTRG. 205288. 1 | TLE6     | XLOC_214579 | 302 coding  | noncoding | noncoding | noncoding |
| MSTRG. 205302. 1 | TLE2     | XLOC_214582 | 276 coding  | noncoding | noncoding | noncoding |
| MSTRG. 205338. 1 | CELF5    | XLOC_214595 | 252 coding  | noncoding | noncoding | noncoding |
| MSTRG. 205366. 1 |          | XLOC_214621 | 257 coding  | noncoding | noncoding | noncoding |
| MSTRG. 205389. 1 | CACTIN   | XLOC_214627 | 285 coding  | noncoding | noncoding | noncoding |
| MSTRG. 205420. 1 | ZFR2     | XLOC_214642 | 256 coding  | noncoding | noncoding | noncoding |
| MSTRG. 205414. 1 |          | XLOC_214646 | 242 coding  | noncoding | noncoding | noncoding |
| MSTRG. 205449. 1 | MAP2K2   | XLOC_214659 | 376 coding  | noncoding | noncoding | noncoding |
| MSTRG. 205470. 1 | STAP2    | XLOC_214669 | 340 coding  | noncoding | noncoding | noncoding |
| MSTRG. 205497. 1 | HDGFL2   | XLOC_214685 | 227 coding  | noncoding | noncoding | noncoding |
| XM_011527639. 2  | SEMA6B   | XLOC_214692 | 4009 coding | coding    | coding    | coding    |
| MSTRG. 205512. 1 | SEMA6B   | XLOC_214693 | 249 coding  | noncoding | noncoding | noncoding |
| MSTRG. 205523. 1 | MYDGF    | XLOC_214701 | 355 coding  | noncoding | noncoding | noncoding |
| NR_158699. 1     | DPP9     | XLOC_214702 | 4411 coding | coding    | coding    | coding    |
| MSTRG. 205527. 1 |          | XLOC_214705 | 240 coding  | noncoding | noncoding | noncoding |
| MSTRG. 205528. 1 |          | XLOC_214706 | 332 coding  | noncoding | noncoding | noncoding |
| NM_001080523. 3  | ARRDC5   | XLOC_214711 | 1667 coding | coding    | coding    | coding    |
| MSTRG. 205550. 1 |          | XLOC_214725 | 250 coding  | noncoding | noncoding | noncoding |
| MSTRG. 205552. 1 |          | XLOC_214726 | 235 coding  | noncoding | noncoding | noncoding |
| MSTRG. 205554. 1 |          | XLOC_214727 | 221 coding  | noncoding | noncoding | noncoding |
| MSTRG. 205559. 1 |          | XLOC_214730 | 209 coding  | noncoding | noncoding | noncoding |
| MSTRG. 205635. 1 | CATSPERD | XLOC_214748 | 321 coding  | noncoding | noncoding | noncoding |
| MSTRG. 205639. 1 | CATSPERD | XLOC_214749 | 291 coding  | noncoding | noncoding | noncoding |
| MSTRG. 205598. 1 | FUT3     | XLOC_214754 | 234 coding  | noncoding | noncoding | noncoding |
| MSTRG. 205752. 1 | RFX2     | XLOC_214770 | 286 coding  | noncoding | noncoding | noncoding |
| MSTRG. 205764. 1 | RFX2     | XLOC_214776 | 308 coding  | noncoding | noncoding | noncoding |
| MSTRG. 205643. 1 | ACSBG2   | XLOC_214783 | 314 coding  | noncoding | noncoding | noncoding |
| MSTRG. 205668. 1 | ACER1    | XLOC_214790 | 284 coding  | noncoding | noncoding | noncoding |
| MSTRG. 205679. 1 | GTF2F1   | XLOC_214795 | 226 coding  | noncoding | noncoding | noncoding |
| XM_011528281. 2  | SLC25A23 | XLOC_214800 | 3601 coding | coding    | coding    | coding    |
| MSTRG. 205690. 1 |          | XLOC_214803 | 269 coding  | noncoding | noncoding | noncoding |
| MSTRG. 205699. 1 |          | XLOC_214807 | 241 coding  | noncoding | noncoding | noncoding |
| MSTRG. 205715. 1 | C3       | XLOC_214812 | 324 coding  | noncoding | noncoding | noncoding |
| MSTRG. 205779. 1 |          | XLOC_214819 | 253 coding  | noncoding | noncoding | noncoding |

|                  |               |             |              |           |           |           |
|------------------|---------------|-------------|--------------|-----------|-----------|-----------|
| MSTRG. 205798. 1 |               | XLOC_214831 | 216 coding   | noncoding | noncoding | noncoding |
| XM_011527988. 2  | INSR          | XLOC_214832 | 9459 coding  | coding    | coding    | coding    |
| MSTRG. 205810. 1 | INSR          | XLOC_214833 | 247 coding   | noncoding | noncoding | noncoding |
| MSTRG. 205811. 1 | INSR          | XLOC_214834 | 223 coding   | noncoding | noncoding | noncoding |
| MSTRG. 205802. 1 |               | XLOC_214836 | 260 coding   | noncoding | noncoding | noncoding |
| XR_001753854. 1  | LOC107985284  | XLOC_214838 | 347 coding   | noncoding | noncoding | noncoding |
| MSTRG. 205832. 1 | ARHGEF18      | XLOC_214842 | 1050 coding  | noncoding | noncoding | noncoding |
| MSTRG. 205815. 1 | TEX45         | XLOC_214846 | 280 coding   | noncoding | noncoding | noncoding |
| MSTRG. 205813. 1 |               | XLOC_214847 | 265 coding   | noncoding | noncoding | noncoding |
| MSTRG. 205841. 4 | PNPLA6        | XLOC_214850 | 459 coding   | coding    | noncoding | noncoding |
| MSTRG. 205817. 1 |               | XLOC_214851 | 250 coding   | noncoding | noncoding | noncoding |
| MSTRG. 205859. 1 |               | XLOC_214867 | 311 coding   | noncoding | noncoding | noncoding |
| MSTRG. 205862. 1 |               | XLOC_214870 | 236 coding   | noncoding | noncoding | noncoding |
| MSTRG. 205866. 1 | LRRC8E        | XLOC_214880 | 311 coding   | coding    | noncoding | noncoding |
| MSTRG. 205885. 2 | MAP2K7        | XLOC_214881 | 1233 coding  | coding    | coding    | noncoding |
| MSTRG. 205905. 1 | FBN3          | XLOC_214890 | 294 coding   | noncoding | noncoding | noncoding |
| MSTRG. 205907. 1 | FBN3          | XLOC_214891 | 307 coding   | noncoding | noncoding | noncoding |
| MSTRG. 205915. 3 | CERS4         | XLOC_214893 | 1515 coding  | coding    | coding    | noncoding |
| MSTRG. 205945. 1 |               | XLOC_214909 | 257 coding   | noncoding | noncoding | noncoding |
| MSTRG. 205966. 1 |               | XLOC_214918 | 292 coding   | noncoding | noncoding | noncoding |
| NM_178525. 5     | ACTL9         | XLOC_214923 | 1396 coding  | coding    | coding    | coding    |
| NM_024690. 2     | MUC16         | XLOC_214929 | 43816 coding | coding    | noncoding | coding    |
| MSTRG. 205998. 1 |               | XLOC_214931 | 326 coding   | noncoding | noncoding | noncoding |
| MSTRG. 205999. 1 |               | XLOC_214932 | 280 coding   | noncoding | noncoding | noncoding |
| MSTRG. 206023. 1 |               | XLOC_214943 | 249 coding   | noncoding | noncoding | noncoding |
| MSTRG. 206043. 1 | ZNF559-ZNF177 | XLOC_214950 | 253 coding   | noncoding | noncoding | noncoding |
| MSTRG. 206065. 1 | ZNF560        | XLOC_214959 | 231 coding   | noncoding | noncoding | noncoding |
| MSTRG. 206055. 1 | ZNF121        | XLOC_214962 | 282 coding   | noncoding | noncoding | noncoding |
| MSTRG. 206068. 1 | ZNF121        | XLOC_214964 | 220 coding   | noncoding | noncoding | noncoding |
| MSTRG. 206083. 1 | ZNF561-AS1    | XLOC_214969 | 266 coding   | noncoding | noncoding | noncoding |
| NM_001300885. 2  | ZNF562        | XLOC_214976 | 5789 coding  | coding    | coding    | coding    |
| MSTRG. 206108. 1 | ZNF846        | XLOC_214986 | 283 coding   | noncoding | noncoding | noncoding |
| MSTRG. 206099. 1 |               | XLOC_214989 | 314 coding   | noncoding | noncoding | noncoding |
| MSTRG. 206115. 1 | LOC100996288  | XLOC_214992 | 326 coding   | noncoding | noncoding | noncoding |
| MSTRG. 206127. 1 |               | XLOC_215000 | 305 coding   | noncoding | noncoding | noncoding |
| MSTRG. 206158. 1 | DNMT1         | XLOC_215004 | 230 coding   | noncoding | noncoding | noncoding |
| MSTRG. 206161. 1 |               | XLOC_215006 | 342 coding   | noncoding | noncoding | noncoding |
| MSTRG. 206146. 1 | ICAM5         | XLOC_215012 | 325 coding   | noncoding | noncoding | noncoding |
| MSTRG. 206144. 1 |               | XLOC_215014 | 227 coding   | noncoding | noncoding | noncoding |
| NM_001103167. 1  | ZGLP1         | XLOC_215015 | 1980 coding  | coding    | coding    | coding    |
| MSTRG. 206199. 1 |               | XLOC_215019 | 259 coding   | noncoding | noncoding | noncoding |
| XM_011528246. 3  | TYK2          | XLOC_215021 | 3984 coding  | coding    | coding    | coding    |
| MSTRG. 206205. 1 | TYK2          | XLOC_215022 | 330 coding   | noncoding | noncoding | noncoding |

|                  |              |             |             |           |           |           |
|------------------|--------------|-------------|-------------|-----------|-----------|-----------|
| MSTRG. 206206. 1 | TYK2         | XLOC_215023 | 220 coding  | noncoding | noncoding | noncoding |
| MSTRG. 206169. 1 | CDC37        | XLOC_215024 | 283 coding  | noncoding | noncoding | noncoding |
| MSTRG. 206167. 1 |              | XLOC_215027 | 246 coding  | noncoding | noncoding | noncoding |
| MSTRG. 206177. 1 | PDE4A        | XLOC_215028 | 638 coding  | noncoding | coding    | noncoding |
| MSTRG. 206179. 1 | PDE4A        | XLOC_215029 | 307 coding  | noncoding | noncoding | noncoding |
| MSTRG. 206174. 1 |              | XLOC_215032 | 224 coding  | noncoding | noncoding | noncoding |
| MSTRG. 206186. 1 | KEAP1        | XLOC_215034 | 299 coding  | noncoding | noncoding | noncoding |
| MSTRG. 206190. 1 | S1PR5        | XLOC_215036 | 404 coding  | noncoding | noncoding | noncoding |
| MSTRG. 206188. 1 |              | XLOC_215038 | 279 coding  | noncoding | noncoding | noncoding |
| MSTRG. 206259. 1 | SMARCA4      | XLOC_215055 | 270 coding  | noncoding | noncoding | noncoding |
| MSTRG. 206252. 1 |              | XLOC_215061 | 365 coding  | noncoding | noncoding | noncoding |
| MSTRG. 206255. 1 |              | XLOC_215062 | 229 coding  | noncoding | noncoding | noncoding |
| MSTRG. 206267. 1 | SPC24        | XLOC_215065 | 220 coding  | noncoding | noncoding | noncoding |
| MSTRG. 206276. 1 | KANK2        | XLOC_215067 | 293 coding  | noncoding | noncoding | noncoding |
| MSTRG. 206277. 1 | KANK2        | XLOC_215068 | 309 coding  | noncoding | noncoding | noncoding |
| MSTRG. 206278. 1 | KANK2        | XLOC_215069 | 251 coding  | noncoding | noncoding | noncoding |
| MSTRG. 206279. 1 | KANK2        | XLOC_215070 | 203 coding  | noncoding | noncoding | noncoding |
| MSTRG. 206293. 1 |              | XLOC_215074 | 231 coding  | noncoding | noncoding | noncoding |
| MSTRG. 206291. 1 | EPOR         | XLOC_215083 | 247 coding  | noncoding | noncoding | noncoding |
| MSTRG. 206319. 1 | ELAVL3       | XLOC_215087 | 255 coding  | noncoding | noncoding | noncoding |
| MSTRG. 206324. 1 | ZNF653       | XLOC_215089 | 280 coding  | noncoding | noncoding | noncoding |
| MSTRG. 206331. 1 | ECSIT        | XLOC_215092 | 286 coding  | noncoding | noncoding | noncoding |
| MSTRG. 206332. 1 | ECSIT        | XLOC_215093 | 283 coding  | noncoding | noncoding | noncoding |
| MSTRG. 206342. 1 |              | XLOC_215102 | 271 coding  | noncoding | noncoding | noncoding |
| MSTRG. 206347. 1 | ZNF823       | XLOC_215105 | 289 coding  | noncoding | noncoding | noncoding |
| MSTRG. 206357. 1 | ZNF491       | XLOC_215112 | 341 coding  | noncoding | noncoding | noncoding |
| MSTRG. 206393. 1 |              | XLOC_215119 | 275 coding  | noncoding | noncoding | noncoding |
| MSTRG. 206404. 2 | ZNF700       | XLOC_215127 | 2598 coding | coding    | noncoding | coding    |
| MSTRG. 206404. 4 | ZNF700       | XLOC_215127 | 2870 coding | coding    | noncoding | coding    |
| MSTRG. 206374. 1 | LOC105372275 | XLOC_215153 | 249 coding  | noncoding | noncoding | noncoding |
| MSTRG. 206379. 1 | ZNF625-ZNF20 | XLOC_215156 | 242 coding  | noncoding | noncoding | noncoding |
| NM_001353553. 1  | ZNF44        | XLOC_215157 | 2801 coding | coding    | coding    | coding    |
| MSTRG. 206453. 1 | ZNF563       | XLOC_215164 | 417 coding  | noncoding | noncoding | noncoding |
| MSTRG. 206464. 1 |              | XLOC_215167 | 249 coding  | noncoding | noncoding | noncoding |
| MSTRG. 206465. 1 |              | XLOC_215168 | 263 coding  | noncoding | noncoding | noncoding |
| MSTRG. 206479. 1 | ZNF564       | XLOC_215175 | 276 coding  | noncoding | noncoding | noncoding |
| MSTRG. 206500. 1 | TNPO2        | XLOC_215185 | 409 coding  | noncoding | noncoding | noncoding |
| MSTRG. 206483. 1 |              | XLOC_215187 | 233 coding  | noncoding | noncoding | noncoding |
| MSTRG. 206509. 1 | HOOK2        | XLOC_215191 | 282 coding  | noncoding | noncoding | noncoding |
| MSTRG. 206533. 1 | MAST1        | XLOC_215201 | 296 coding  | noncoding | noncoding | noncoding |
| MSTRG. 206534. 1 | MAST1        | XLOC_215202 | 272 coding  | noncoding | coding    | noncoding |
| MSTRG. 206547. 3 | CALR         | XLOC_215209 | 1730 coding | coding    | coding    | noncoding |
| NM_052850. 4     | GADD45GIP1   | XLOC_215210 | 1769 coding | coding    | coding    | coding    |

|                  |           |             |             |           |           |           |
|------------------|-----------|-------------|-------------|-----------|-----------|-----------|
| MSTRG. 206544. 1 |           | XLOC_215211 | 307 coding  | noncoding | noncoding | noncoding |
| NM_001271609. 2  | STX10     | XLOC_215217 | 1300 coding | coding    | coding    | coding    |
| MSTRG. 206567. 1 | CACNA1A   | XLOC_215223 | 327 coding  | noncoding | noncoding | noncoding |
| MSTRG. 206570. 1 | CACNA1A   | XLOC_215225 | 255 coding  | noncoding | noncoding | noncoding |
| MSTRG. 206557. 1 |           | XLOC_215229 | 229 coding  | noncoding | noncoding | noncoding |
| MSTRG. 206564. 1 |           | XLOC_215233 | 289 coding  | noncoding | noncoding | noncoding |
| XM_011527801. 2  | ADGRL1    | XLOC_215253 | 7446 coding | coding    | coding    | coding    |
| XM_024451420. 1  | ADGRL1    | XLOC_215253 | 8125 coding | coding    | coding    | coding    |
| MSTRG. 206628. 1 | LINC01842 | XLOC_215255 | 225 coding  | noncoding | noncoding | noncoding |
| MSTRG. 206653. 1 | GIPC1     | XLOC_215263 | 282 coding  | coding    | noncoding | noncoding |
| MSTRG. 206709. 1 | ZNF333    | XLOC_215274 | 275 coding  | noncoding | noncoding | noncoding |
| MSTRG. 206717. 1 | ADGRE2    | XLOC_215282 | 405 coding  | noncoding | noncoding | noncoding |
| NM_030901. 1     | OR7A17    | XLOC_215289 | 930 coding  | coding    | coding    | coding    |
| MSTRG. 206672. 1 |           | XLOC_215291 | 238 coding  | noncoding | noncoding | noncoding |
| MSTRG. 206674. 1 | OR7C2     | XLOC_215292 | 254 coding  | coding    | noncoding | noncoding |
| MSTRG. 206677. 1 | SLC1A6    | XLOC_215294 | 249 coding  | noncoding | noncoding | noncoding |
| XM_005259717. 4  | ILVBL     | XLOC_215295 | 2470 coding | coding    | coding    | coding    |
| MSTRG. 206679. 1 |           | XLOC_215297 | 267 coding  | noncoding | noncoding | noncoding |
| MSTRG. 206687. 1 | NOTCH3    | XLOC_215300 | 328 coding  | noncoding | noncoding | noncoding |
| XM_011527854. 2  | BRD4      | XLOC_215302 | 5701 coding | coding    | coding    | coding    |
| MSTRG. 206696. 6 | BRD4      | XLOC_215302 | 866 coding  | coding    | coding    | noncoding |
| MSTRG. 206732. 1 |           | XLOC_215314 | 250 coding  | noncoding | noncoding | noncoding |
| MSTRG. 206740. 1 |           | XLOC_215318 | 226 coding  | noncoding | noncoding | noncoding |
| MSTRG. 206786. 2 | CYP4F3    | XLOC_215323 | 2928 coding | coding    | coding    | coding    |
| MSTRG. 206768. 1 |           | XLOC_215350 | 283 coding  | noncoding | noncoding | noncoding |
| MSTRG. 206819. 1 | HSH2D     | XLOC_215357 | 267 coding  | noncoding | noncoding | noncoding |
| MSTRG. 206838. 1 |           | XLOC_215369 | 253 coding  | noncoding | noncoding | noncoding |
| MSTRG. 206847. 1 | C19orf44  | XLOC_215384 | 341 coding  | noncoding | noncoding | noncoding |
| MSTRG. 206851. 1 | CHERP     | XLOC_215388 | 311 coding  | noncoding | noncoding | noncoding |
| MSTRG. 206871. 1 |           | XLOC_215404 | 235 coding  | noncoding | noncoding | noncoding |
| MSTRG. 206916. 1 |           | XLOC_215413 | 278 coding  | noncoding | noncoding | noncoding |
| MSTRG. 206932. 1 |           | XLOC_215419 | 235 coding  | noncoding | noncoding | noncoding |
| MSTRG. 206938. 1 | NR2F6     | XLOC_215422 | 256 coding  | noncoding | noncoding | noncoding |
| MSTRG. 206975. 1 | PLVAP     | XLOC_215432 | 226 coding  | noncoding | noncoding | noncoding |
| MSTRG. 206959. 1 | CCDC194   | XLOC_215434 | 292 coding  | noncoding | noncoding | noncoding |
| MSTRG. 206998. 7 | NIBAN3    | XLOC_215441 | 2089 coding | noncoding | coding    | coding    |
| MSTRG. 206989. 1 | UNC13A    | XLOC_215445 | 319 coding  | noncoding | noncoding | noncoding |
| MSTRG. 206986. 1 |           | XLOC_215447 | 236 coding  | noncoding | noncoding | noncoding |
| MSTRG. 207010. 1 |           | XLOC_215454 | 486 coding  | noncoding | noncoding | noncoding |
| MSTRG. 207022. 1 | SLC5A5    | XLOC_215456 | 270 coding  | noncoding | noncoding | noncoding |
| MSTRG. 207016. 1 |           | XLOC_215459 | 306 coding  | noncoding | noncoding | noncoding |
| MSTRG. 207028. 1 | KCNN1     | XLOC_215462 | 262 coding  | noncoding | noncoding | noncoding |
| NM_001330172. 1  | PDE4C     | XLOC_215481 | 5478 coding | coding    | coding    | coding    |

|                |              |             |              |           |           |           |
|----------------|--------------|-------------|--------------|-----------|-----------|-----------|
| NR_036575.1    | LOC729966    | XLOC_215482 | 687 coding   | noncoding | noncoding | noncoding |
| XM_011528324.1 | IQC�         | XLOC_215483 | 4348 coding  | coding    | coding    | coding    |
| MSTRG.207057.1 | IQC�         | XLOC_215484 | 494 coding   | noncoding | noncoding | noncoding |
| MSTRG.207068.1 | LSM4         | XLOC_215494 | 554 coding   | noncoding | noncoding | noncoding |
| MSTRG.207059.1 |              | XLOC_215496 | 244 coding   | noncoding | noncoding | noncoding |
| MSTRG.207061.1 |              | XLOC_215497 | 206 coding   | noncoding | noncoding | noncoding |
| MSTRG.207110.1 |              | XLOC_215514 | 241 coding   | noncoding | noncoding | noncoding |
| MSTRG.207152.1 |              | XLOC_215540 | 236 coding   | noncoding | noncoding | noncoding |
| NM_032037.4    | TSSK6        | XLOC_215565 | 1330 coding  | coding    | coding    | coding    |
| MSTRG.207211.1 | CILP2        | XLOC_215569 | 295 coding   | noncoding | noncoding | noncoding |
| MSTRG.207260.1 |              | XLOC_215581 | 307 coding   | noncoding | noncoding | noncoding |
| MSTRG.207268.1 |              | XLOC_215600 | 422 coding   | noncoding | noncoding | noncoding |
| MSTRG.207338.1 | LOC105372310 | XLOC_215619 | 208 coding   | noncoding | noncoding | noncoding |
| MSTRG.207345.1 | LOC105372311 | XLOC_215622 | 358 coding   | noncoding | noncoding | noncoding |
| MSTRG.207352.1 | LOC102724427 | XLOC_215624 | 221 coding   | noncoding | noncoding | noncoding |
| MSTRG.207382.1 | LOC105372316 | XLOC_215630 | 287 coding   | coding    | noncoding | noncoding |
| MSTRG.207390.1 | LOC105372316 | XLOC_215633 | 290 coding   | noncoding | noncoding | noncoding |
| MSTRG.207395.1 |              | XLOC_215636 | 427 coding   | noncoding | noncoding | noncoding |
| MSTRG.207407.1 | ZNF626       | XLOC_215641 | 311 coding   | noncoding | noncoding | noncoding |
| MSTRG.207580.1 |              | XLOC_215665 | 210 coding   | noncoding | noncoding | noncoding |
| MSTRG.207426.1 | LINC00664    | XLOC_215679 | 445 coding   | noncoding | noncoding | noncoding |
| XM_017027207.2 | ZNF43        | XLOC_215699 | 11241 coding | coding    | coding    | coding    |
| MSTRG.207467.1 | ZNF43        | XLOC_215700 | 266 coding   | noncoding | noncoding | noncoding |
| MSTRG.207508.1 |              | XLOC_215723 | 274 coding   | noncoding | noncoding | noncoding |
| MSTRG.207526.1 |              | XLOC_215737 | 240 coding   | noncoding | noncoding | noncoding |
| MSTRG.207537.1 | ZNF723       | XLOC_215743 | 272 coding   | noncoding | noncoding | noncoding |
| MSTRG.207534.1 |              | XLOC_215747 | 262 coding   | noncoding | noncoding | noncoding |
| MSTRG.207541.1 |              | XLOC_215750 | 364 coding   | noncoding | noncoding | noncoding |
| MSTRG.207548.1 | ZNF730       | XLOC_215752 | 289 coding   | noncoding | noncoding | noncoding |
| MSTRG.207667.1 |              | XLOC_215770 | 250 coding   | coding    | noncoding | noncoding |
| MSTRG.207629.1 |              | XLOC_215801 | 469 coding   | coding    | noncoding | noncoding |
| MSTRG.207740.1 | LOC105376906 | XLOC_215824 | 282 coding   | coding    | noncoding | noncoding |
| XR_935883.3    | LOC105372346 | XLOC_215848 | 2862 coding  | noncoding | noncoding | noncoding |
| NR_110759.1    | LOC100420587 | XLOC_215855 | 3127 coding  | noncoding | noncoding | noncoding |
| MSTRG.207775.1 | LOC100420587 | XLOC_215857 | 232 coding   | noncoding | noncoding | noncoding |
| MSTRG.207839.1 |              | XLOC_215870 | 219 coding   | noncoding | noncoding | noncoding |
| MSTRG.207842.1 | LOC284395    | XLOC_215873 | 2732 coding  | noncoding | coding    | noncoding |
| MSTRG.207860.2 | POP4         | XLOC_215880 | 1503 coding  | coding    | coding    | noncoding |
| MSTRG.207873.1 |              | XLOC_215888 | 237 coding   | noncoding | noncoding | noncoding |
| MSTRG.207875.1 |              | XLOC_215889 | 269 coding   | noncoding | noncoding | noncoding |
| MSTRG.207910.1 | TSHZ3        | XLOC_215923 | 337 coding   | noncoding | noncoding | noncoding |
| MSTRG.207992.1 | LINC01837    | XLOC_215953 | 341 coding   | noncoding | noncoding | noncoding |
| NR_110694.1    | LINC01782    | XLOC_215954 | 2908 coding  | noncoding | noncoding | noncoding |

|                  |              |             |             |           |           |           |
|------------------|--------------|-------------|-------------|-----------|-----------|-----------|
| MSTRG. 208071. 1 | ANKRD27      | XLOC_215970 | 265 coding  | noncoding | noncoding | noncoding |
| MSTRG. 208080. 1 | TDRD12       | XLOC_215974 | 451 coding  | noncoding | noncoding | noncoding |
| MSTRG. 208100. 1 | FAAP24       | XLOC_215983 | 272 coding  | coding    | noncoding | noncoding |
| MSTRG. 208107. 1 | RHPN2        | XLOC_215988 | 237 coding  | noncoding | noncoding | noncoding |
| MSTRG. 208113. 1 |              | XLOC_215995 | 293 coding  | noncoding | noncoding | noncoding |
| MSTRG. 208133. 1 |              | XLOC_216007 | 332 coding  | noncoding | noncoding | noncoding |
| MSTRG. 208139. 1 |              | XLOC_216011 | 266 coding  | noncoding | noncoding | noncoding |
| MSTRG. 208164. 1 |              | XLOC_216015 | 217 coding  | noncoding | noncoding | noncoding |
| MSTRG. 208170. 1 |              | XLOC_216018 | 230 coding  | noncoding | noncoding | noncoding |
| MSTRG. 208171. 1 |              | XLOC_216019 | 277 coding  | noncoding | noncoding | noncoding |
| MSTRG. 208182. 1 | LOC105372374 | XLOC_216030 | 236 coding  | noncoding | noncoding | noncoding |
| MSTRG. 208294. 1 |              | XLOC_216071 | 258 coding  | noncoding | noncoding | noncoding |
| MSTRG. 208304. 1 |              | XLOC_216074 | 302 coding  | coding    | noncoding | noncoding |
| MSTRG. 208319. 1 | FFAR1        | XLOC_216081 | 229 coding  | noncoding | coding    | noncoding |
| MSTRG. 208338. 9 | FFAR2        | XLOC_216085 | 2569 coding | coding    | coding    | coding    |
| NM_001166034. 2  | SBSN         | XLOC_216089 | 1946 coding | noncoding | coding    | coding    |
| MSTRG. 208354. 1 |              | XLOC_216093 | 297 coding  | noncoding | noncoding | noncoding |
| MSTRG. 208376. 1 | ZBTB32       | XLOC_216104 | 218 coding  | noncoding | noncoding | noncoding |
| MSTRG. 208379. 1 | KMT2B        | XLOC_216106 | 1827 coding | coding    | coding    | noncoding |
| MSTRG. 208382. 1 | KMT2B        | XLOC_216109 | 722 coding  | noncoding | noncoding | noncoding |
| MSTRG. 208410. 1 | KIRREL2      | XLOC_216123 | 262 coding  | noncoding | noncoding | noncoding |
| MSTRG. 208418. 1 | LOC101927572 | XLOC_216135 | 245 coding  | noncoding | noncoding | noncoding |
| MSTRG. 208422. 1 | LOC101927572 | XLOC_216138 | 301 coding  | noncoding | noncoding | noncoding |
| MSTRG. 208426. 1 | WDR62        | XLOC_216140 | 230 coding  | noncoding | noncoding | noncoding |
| NM_001321918. 2  | ZFP82        | XLOC_216152 | 1796 coding | coding    | coding    | noncoding |
| NM_133466. 4     | ZFP82        | XLOC_216152 | 5941 coding | coding    | coding    | coding    |
| MSTRG. 208457. 1 | ZFP82        | XLOC_216153 | 293 coding  | noncoding | noncoding | noncoding |
| NM_001012756. 3  | ZNF260       | XLOC_216160 | 5399 coding | coding    | coding    | coding    |
| XM_011527169. 2  | ZNF529       | XLOC_216162 | 1841 coding | coding    | coding    | coding    |
| NM_001193552. 2  | ZNF850       | XLOC_216184 | 7712 coding | coding    | coding    | coding    |
| MSTRG. 208542. 1 |              | XLOC_216226 | 230 coding  | noncoding | noncoding | noncoding |
| MSTRG. 208611. 1 | ZNF793       | XLOC_216253 | 310 coding  | noncoding | noncoding | noncoding |
| MSTRG. 208649. 1 | ZNF571-AS1   | XLOC_216259 | 445 coding  | noncoding | noncoding | noncoding |
| XM_006723435. 4  | ZNF607       | XLOC_216268 | 4966 coding | coding    | coding    | coding    |
| MSTRG. 208678. 1 | ZNF607       | XLOC_216270 | 228 coding  | noncoding | noncoding | noncoding |
| MSTRG. 208684. 1 |              | XLOC_216271 | 265 coding  | noncoding | noncoding | noncoding |
| MSTRG. 208690. 1 | ZNF573       | XLOC_216273 | 226 coding  | noncoding | noncoding | noncoding |
| MSTRG. 208718. 1 | LOC105372395 | XLOC_216278 | 249 coding  | noncoding | noncoding | noncoding |
| MSTRG. 208720. 1 | LOC105372395 | XLOC_216280 | 247 coding  | noncoding | noncoding | noncoding |
| MSTRG. 208736. 1 | SIPA1L3      | XLOC_216285 | 1952 coding | noncoding | coding    | noncoding |
| XR_935732. 2     | RASGRP4      | XLOC_216303 | 2549 coding | coding    | coding    | coding    |
| MSTRG. 208746. 1 | RYR1         | XLOC_216305 | 298 coding  | coding    | noncoding | noncoding |
| MSTRG. 208748. 1 | RYR1         | XLOC_216307 | 340 coding  | noncoding | noncoding | noncoding |

|                  |          |             |             |           |           |           |
|------------------|----------|-------------|-------------|-----------|-----------|-----------|
| MSTRG. 208749. 1 | RYR1     | XLOC_216308 | 229 coding  | noncoding | noncoding | noncoding |
| MSTRG. 208754. 1 | RYR1     | XLOC_216310 | 296 coding  | noncoding | noncoding | noncoding |
| MSTRG. 208744. 1 |          | XLOC_216319 | 299 coding  | noncoding | noncoding | noncoding |
| MSTRG. 208791. 1 | PAK4     | XLOC_216335 | 282 coding  | noncoding | noncoding | noncoding |
| MSTRG. 208793. 1 | PAK4     | XLOC_216337 | 261 coding  | coding    | noncoding | noncoding |
| MSTRG. 208781. 1 |          | XLOC_216340 | 246 coding  | noncoding | noncoding | noncoding |
| MSTRG. 208785. 3 | IFNL3    | XLOC_216341 | 258 coding  | coding    | noncoding | noncoding |
| MSTRG. 208838. 2 | SAMD4B   | XLOC_216353 | 255 coding  | noncoding | noncoding | noncoding |
| NM_001256826. 2  | PAF1     | XLOC_216355 | 1986 coding | coding    | coding    | coding    |
| MSTRG. 208853. 1 | PLEKHG2  | XLOC_216364 | 218 coding  | noncoding | noncoding | noncoding |
| MSTRG. 208812. 1 |          | XLOC_216372 | 258 coding  | noncoding | noncoding | noncoding |
| MSTRG. 208830. 1 |          | XLOC_216377 | 292 coding  | noncoding | noncoding | noncoding |
| MSTRG. 208886. 1 |          | XLOC_216399 | 271 coding  | noncoding | noncoding | noncoding |
| XM_017026470. 2  | AKT2     | XLOC_216405 | 6537 coding | coding    | coding    | coding    |
| MSTRG. 208935. 1 | C19orf47 | XLOC_216411 | 238 coding  | noncoding | noncoding | noncoding |
| XM_006723036. 3  | HIPK4    | XLOC_216413 | 3139 coding | coding    | coding    | coding    |
| NM_020956. 2     | PRX      | XLOC_216414 | 5506 coding | noncoding | coding    | coding    |
| MSTRG. 208922. 1 | PRX      | XLOC_216417 | 282 coding  | noncoding | noncoding | noncoding |
| MSTRG. 208956. 1 | SPTBN4   | XLOC_216423 | 235 coding  | noncoding | noncoding | noncoding |
| MSTRG. 208994. 1 |          | XLOC_216456 | 235 coding  | coding    | noncoding | noncoding |
| MSTRG. 208997. 1 |          | XLOC_216457 | 241 coding  | noncoding | noncoding | noncoding |
| MSTRG. 209004. 1 | CYP2S1   | XLOC_216460 | 215 coding  | noncoding | noncoding | noncoding |
| MSTRG. 209077. 1 | CEACAM5  | XLOC_216487 | 384 coding  | coding    | noncoding | noncoding |
| MSTRG. 209133. 3 | ARHGEF1  | XLOC_216504 | 4150 coding | coding    | coding    | noncoding |
| XM_017026713. 1  | GRIK5    | XLOC_216511 | 5286 coding | coding    | coding    | coding    |
| MSTRG. 209258. 1 | POU2F2   | XLOC_216515 | 314 coding  | noncoding | noncoding | noncoding |
| XR_001753673. 1  | GSK3A    | XLOC_216528 | 2638 coding | coding    | coding    | coding    |
| MSTRG. 209174. 1 | CIC      | XLOC_216540 | 1164 coding | coding    | coding    | noncoding |
| MSTRG. 209176. 1 | CIC      | XLOC_216542 | 2266 coding | noncoding | coding    | coding    |
| MSTRG. 209176. 2 | CIC      | XLOC_216542 | 696 coding  | noncoding | coding    | noncoding |
| MSTRG. 209177. 1 | CIC      | XLOC_216543 | 581 coding  | noncoding | coding    | noncoding |
| MSTRG. 209160. 1 | MEGF8    | XLOC_216547 | 273 coding  | noncoding | noncoding | noncoding |
| MSTRG. 209162. 1 | MEGF8    | XLOC_216548 | 249 coding  | coding    | noncoding | noncoding |
| MSTRG. 209164. 1 | MEGF8    | XLOC_216550 | 222 coding  | noncoding | noncoding | noncoding |
| MSTRG. 209157. 1 | CNFN     | XLOC_216555 | 258 coding  | noncoding | noncoding | noncoding |
| MSTRG. 209189. 1 |          | XLOC_216573 | 214 coding  | noncoding | noncoding | noncoding |
| MSTRG. 209188. 1 |          | XLOC_216574 | 441 coding  | noncoding | noncoding | noncoding |
| MSTRG. 209196. 1 |          | XLOC_216581 | 281 coding  | noncoding | noncoding | noncoding |
| MSTRG. 209313. 1 |          | XLOC_216598 | 246 coding  | noncoding | noncoding | noncoding |
| NM_001007561. 2  | IRGQ     | XLOC_216609 | 9687 coding | noncoding | coding    | coding    |
| XM_017026872. 2  | PLAUR    | XLOC_216617 | 1786 coding | coding    | coding    | coding    |
| MSTRG. 209350. 1 |          | XLOC_216623 | 491 coding  | noncoding | noncoding | noncoding |
| NM_001288763. 1  | LYPD5    | XLOC_216626 | 2551 coding | coding    | coding    | coding    |

|                  |              |             |             |           |           |           |
|------------------|--------------|-------------|-------------|-----------|-----------|-----------|
| MSTRG. 209524. 1 | ZNF233       | XLOC_216662 | 624 coding  | noncoding | noncoding | noncoding |
| MSTRG. 209469. 1 |              | XLOC_216699 | 265 coding  | noncoding | noncoding | noncoding |
| MSTRG. 209498. 1 | BCL3         | XLOC_216701 | 265 coding  | noncoding | noncoding | noncoding |
| MSTRG. 209474. 1 |              | XLOC_216704 | 238 coding  | noncoding | noncoding | noncoding |
| MSTRG. 209549. 1 |              | XLOC_216714 | 263 coding  | noncoding | noncoding | noncoding |
| MSTRG. 209563. 1 | PPP1R37      | XLOC_216725 | 323 coding  | noncoding | noncoding | noncoding |
| MSTRG. 209612. 5 | PPP1R13L     | XLOC_216742 | 260 coding  | noncoding | noncoding | noncoding |
| MSTRG. 209645. 2 | GIPR         | XLOC_216756 | 277 coding  | coding    | coding    | noncoding |
| MSTRG. 209633. 1 |              | XLOC_216763 | 255 coding  | noncoding | noncoding | noncoding |
| MSTRG. 209641. 1 | BHMG1        | XLOC_216768 | 257 coding  | noncoding | noncoding | noncoding |
| MSTRG. 209642. 1 | BHMG1        | XLOC_216769 | 351 coding  | noncoding | noncoding | noncoding |
| NM_175875. 5     | SIX5         | XLOC_216770 | 3344 coding | coding    | coding    | coding    |
| MSTRG. 209679. 1 | SYMPK        | XLOC_216776 | 286 coding  | noncoding | noncoding | noncoding |
| NM_002516. 4     | NOVA2        | XLOC_216781 | 8122 coding | coding    | coding    | coding    |
| MSTRG. 209716. 1 |              | XLOC_216809 | 318 coding  | coding    | coding    | noncoding |
| XM_017027504. 2  | GNG8         | XLOC_216818 | 3129 coding | coding    | coding    | noncoding |
| MSTRG. 209745. 1 | DACT3-AS1    | XLOC_216822 | 272 coding  | noncoding | noncoding | noncoding |
| MSTRG. 209735. 1 |              | XLOC_216834 | 259 coding  | noncoding | noncoding | noncoding |
| MSTRG. 209759. 1 | NPAS1        | XLOC_216836 | 224 coding  | noncoding | noncoding | noncoding |
| MSTRG. 209771. 1 | ZC3H4        | XLOC_216838 | 229 coding  | noncoding | noncoding | noncoding |
| XM_005258677. 4  | ZC3H4        | XLOC_216839 | 4076 coding | coding    | coding    | coding    |
| MSTRG. 209775. 1 | ZC3H4        | XLOC_216841 | 289 coding  | noncoding | noncoding | noncoding |
| MSTRG. 209809. 1 | MEIS3        | XLOC_216857 | 326 coding  | noncoding | noncoding | noncoding |
| MSTRG. 209806. 1 | SLC8A2       | XLOC_216859 | 236 coding  | noncoding | noncoding | noncoding |
| MSTRG. 209822. 1 | ZNF541       | XLOC_216867 | 211 coding  | noncoding | noncoding | noncoding |
| MSTRG. 209839. 1 |              | XLOC_216885 | 220 coding  | noncoding | noncoding | noncoding |
| MSTRG. 209849. 1 |              | XLOC_216888 | 485 coding  | noncoding | noncoding | noncoding |
| MSTRG. 209854. 1 |              | XLOC_216891 | 280 coding  | noncoding | noncoding | noncoding |
| MSTRG. 209876. 1 | SNAR-C1      | XLOC_216892 | 507 coding  | noncoding | noncoding | noncoding |
| MSTRG. 209874. 1 | ELSPBP1      | XLOC_216894 | 274 coding  | noncoding | noncoding | noncoding |
| MSTRG. 209885. 1 | PLA2G4C      | XLOC_216897 | 225 coding  | noncoding | noncoding | noncoding |
| MSTRG. 209908. 1 | CCDC114      | XLOC_216910 | 295 coding  | noncoding | noncoding | noncoding |
| MSTRG. 209911. 2 | EMP3         | XLOC_216912 | 727 coding  | coding    | noncoding | noncoding |
| MSTRG. 209919. 1 | TMEM143      | XLOC_216914 | 306 coding  | noncoding | noncoding | noncoding |
| MSTRG. 209913. 1 |              | XLOC_216915 | 373 coding  | noncoding | noncoding | noncoding |
| MSTRG. 209941. 1 | GRIN2D       | XLOC_216919 | 241 coding  | noncoding | noncoding | noncoding |
| XM_011526411. 2  | LMTK3        | XLOC_216925 | 5303 coding | coding    | coding    | coding    |
| MSTRG. 209927. 1 |              | XLOC_216927 | 241 coding  | noncoding | noncoding | noncoding |
| NM_001352. 5     | DBP          | XLOC_216931 | 2170 coding | coding    | coding    | coding    |
| NR_136241. 1     | CA11         | XLOC_216932 | 2492 coding | coding    | coding    | coding    |
| NR_131188. 1     | LOC105447645 | XLOC_216937 | 1399 coding | coding    | coding    | coding    |
| MSTRG. 209990. 1 | BCAT2        | XLOC_216945 | 239 coding  | noncoding | noncoding | noncoding |
| MSTRG. 209968. 1 | HSD17B14     | XLOC_216947 | 222 coding  | noncoding | noncoding | noncoding |

|                  |              |             |             |           |           |           |
|------------------|--------------|-------------|-------------|-----------|-----------|-----------|
| MSTRG. 210001. 1 | DHDH         | XLOC_216954 | 228 coding  | noncoding | noncoding | noncoding |
| MSTRG. 210003. 1 | CGB2         | XLOC_216965 | 239 coding  | noncoding | noncoding | noncoding |
| XM_011527010. 2  | NTF4         | XLOC_216969 | 2184 coding | coding    | coding    | coding    |
| MSTRG. 210028. 1 | PPFIA3       | XLOC_216974 | 278 coding  | noncoding | coding    | noncoding |
| MSTRG. 210044. 1 | LOC107985340 | XLOC_216977 | 227 coding  | noncoding | noncoding | noncoding |
| MSTRG. 210067. 1 | LOC101928295 | XLOC_216985 | 259 coding  | noncoding | noncoding | noncoding |
| MSTRG. 210095. 1 | NOSIP        | XLOC_217000 | 265 coding  | noncoding | noncoding | noncoding |
| MSTRG. 210102. 1 | PRR12        | XLOC_217004 | 273 coding  | noncoding | noncoding | noncoding |
| MSTRG. 210103. 1 | PRR12        | XLOC_217005 | 1297 coding | noncoding | coding    | noncoding |
| MSTRG. 210105. 1 | PRR12        | XLOC_217007 | 251 coding  | noncoding | noncoding | noncoding |
| MSTRG. 210109. 2 | RRAS         | XLOC_217011 | 554 coding  | coding    | coding    | noncoding |
| MSTRG. 210119. 1 |              | XLOC_217019 | 241 coding  | noncoding | noncoding | noncoding |
| MSTRG. 210122. 1 | LOC105372434 | XLOC_217021 | 247 coding  | noncoding | noncoding | noncoding |
| MSTRG. 210123. 1 | LOC105372434 | XLOC_217022 | 376 coding  | noncoding | noncoding | noncoding |
| MSTRG. 210129. 1 |              | XLOC_217031 | 218 coding  | noncoding | noncoding | noncoding |
| MSTRG. 210162. 1 |              | XLOC_217049 | 445 coding  | noncoding | noncoding | noncoding |
| MSTRG. 210171. 1 |              | XLOC_217055 | 252 coding  | noncoding | noncoding | noncoding |
| MSTRG. 210184. 1 | MYH14        | XLOC_217058 | 300 coding  | noncoding | noncoding | noncoding |
| MSTRG. 210187. 1 | MYH14        | XLOC_217059 | 240 coding  | noncoding | noncoding | noncoding |
| MSTRG. 210198. 2 | NR1H2        | XLOC_217063 | 2292 coding | coding    | coding    | coding    |
| MSTRG. 210206. 2 | SPIB         | XLOC_217065 | 1422 coding | coding    | coding    | coding    |
| MSTRG. 210203. 1 | MYBPC2       | XLOC_217067 | 267 coding  | noncoding | noncoding | noncoding |
| MSTRG. 210210. 1 | LRRC4B       | XLOC_217072 | 276 coding  | noncoding | noncoding | noncoding |
| XM_005258951. 3  | KLK12        | XLOC_217100 | 1697 coding | coding    | noncoding | noncoding |
| MSTRG. 210248. 1 |              | XLOC_217101 | 255 coding  | noncoding | noncoding | noncoding |
| MSTRG. 210252. 1 |              | XLOC_217104 | 219 coding  | noncoding | noncoding | noncoding |
| MSTRG. 210274. 1 | IGLON5       | XLOC_217119 | 280 coding  | noncoding | noncoding | noncoding |
| MSTRG. 210276. 1 | VSIG10L      | XLOC_217121 | 262 coding  | noncoding | noncoding | noncoding |
| MSTRG. 210316. 1 | LOC105372446 | XLOC_217130 | 1983 coding | coding    | coding    | noncoding |
| NM_001322105. 2  | SIGLEC10     | XLOC_217131 | 2679 coding | coding    | coding    | coding    |
| NM_001171157. 2  | SIGLEC10     | XLOC_217131 | 2949 coding | coding    | coding    | coding    |
| MSTRG. 210301. 1 |              | XLOC_217132 | 309 coding  | noncoding | noncoding | noncoding |
| MSTRG. 210337. 1 | ZNF175       | XLOC_217141 | 2634 coding | coding    | noncoding | noncoding |
| MSTRG. 210530. 1 | ZNF578       | XLOC_217204 | 305 coding  | noncoding | noncoding | noncoding |
| NM_001351777. 1  | ZNF320       | XLOC_217231 | 5130 coding | coding    | coding    | noncoding |
| NM_001202457. 2  | ZNF816       | XLOC_217233 | 2555 coding | coding    | noncoding | coding    |
| MSTRG. 210584. 1 | ZNF888       | XLOC_217234 | 234 coding  | noncoding | noncoding | noncoding |
| MSTRG. 210476. 1 | ZNF415       | XLOC_217239 | 295 coding  | noncoding | noncoding | noncoding |
| MSTRG. 210454. 1 |              | XLOC_217248 | 443 coding  | noncoding | noncoding | noncoding |
| MSTRG. 210602. 4 | ZNF331       | XLOC_217254 | 279 coding  | coding    | noncoding | noncoding |
| MSTRG. 210484. 1 | LOC284379    | XLOC_217256 | 228 coding  | noncoding | noncoding | noncoding |
| MSTRG. 210487. 1 | DPRX         | XLOC_217258 | 285 coding  | noncoding | noncoding | noncoding |
| MSTRG. 210494. 1 |              | XLOC_217259 | 263 coding  | noncoding | noncoding | noncoding |

|                   |              |             |              |           |           |           |
|-------------------|--------------|-------------|--------------|-----------|-----------|-----------|
| MSTRG. 210665. 1  | DNAAF3       | XLOC_217310 | 273 coding   | noncoding | noncoding | noncoding |
| MSTRG. 210681. 1  |              | XLOC_217326 | 299 coding   | noncoding | noncoding | noncoding |
| MSTRG. 210713. 1  | LOC105372462 | XLOC_217338 | 268 coding   | noncoding | noncoding | noncoding |
| MSTRG. 210714. 1  | LOC105372462 | XLOC_217339 | 277 coding   | noncoding | noncoding | noncoding |
| MSTRG. 210723. 1  |              | XLOC_217351 | 313 coding   | noncoding | noncoding | noncoding |
| MSTRG. 210768. 4  | U2AF2        | XLOC_217360 | 1854 coding  | coding    | coding    | noncoding |
| MSTRG. 210772. 4  | EPN1         | XLOC_217361 | 789 coding   | coding    | coding    | noncoding |
| MSTRG. 210745. 1  |              | XLOC_217365 | 277 coding   | noncoding | noncoding | noncoding |
| MSTRG. 210764. 1  | NLRP5        | XLOC_217371 | 307 coding   | noncoding | noncoding | noncoding |
| MSTRG. 210766. 1  | NLRP5        | XLOC_217373 | 266 coding   | coding    | noncoding | noncoding |
| MSTRG. 210767. 1  | NLRP5        | XLOC_217374 | 272 coding   | coding    | noncoding | noncoding |
| MSTRG. 210779. 1  | ZNF444       | XLOC_217376 | 217 coding   | noncoding | noncoding | noncoding |
| NM_001369718. 1   | PEG3         | XLOC_217412 | 8760 coding  | coding    | coding    | coding    |
| MSTRG. 210880. 1  |              | XLOC_217414 | 273 coding   | noncoding | noncoding | noncoding |
| MSTRG. 210883. 1  |              | XLOC_217415 | 202 coding   | noncoding | noncoding | noncoding |
| MSTRG. 210937. 3  | ZNF17        | XLOC_217432 | 2494 coding  | coding    | noncoding | coding    |
| MSTRG. 211098. 1  | ZNF837       | XLOC_217525 | 258 coding   | noncoding | noncoding | noncoding |
| MSTRG. 211138. 1  | ZNF132       | XLOC_217532 | 257 coding   | noncoding | noncoding | noncoding |
| MSTRG. 211156. 1  |              | XLOC_217557 | 284 coding   | noncoding | noncoding | noncoding |
| MSTRG. 211205. 1  | NRSN2-AS1    | XLOC_217571 | 225 coding   | noncoding | noncoding | noncoding |
| MSTRG. 211201. 1  |              | XLOC_217576 | 252 coding   | noncoding | noncoding | noncoding |
| MSTRG. 211216. 1  |              | XLOC_217584 | 247 coding   | noncoding | noncoding | noncoding |
| MSTRG. 211272. 1  |              | XLOC_217602 | 246 coding   | noncoding | noncoding | noncoding |
| MSTRG. 211274. 1  |              | XLOC_217603 | 246 coding   | noncoding | noncoding | noncoding |
| MSTRG. 211508. 14 | SIRPB2       | XLOC_217667 | 3477 coding  | coding    | noncoding | coding    |
| MSTRG. 211408. 1  |              | XLOC_217704 | 211 coding   | noncoding | noncoding | noncoding |
| MSTRG. 211410. 1  |              | XLOC_217705 | 295 coding   | noncoding | noncoding | noncoding |
| MSTRG. 211409. 1  |              | XLOC_217706 | 248 coding   | noncoding | noncoding | noncoding |
| MSTRG. 211412. 1  |              | XLOC_217707 | 280 coding   | noncoding | noncoding | noncoding |
| MSTRG. 211429. 1  |              | XLOC_217721 | 251 coding   | noncoding | noncoding | noncoding |
| MSTRG. 211439. 1  | TGM6         | XLOC_217726 | 224 coding   | coding    | noncoding | noncoding |
| MSTRG. 211450. 3  | SNRPB        | XLOC_217729 | 891 coding   | coding    | coding    | coding    |
| XR_001754152. 1   | TMC2         | XLOC_217737 | 4040 coding  | coding    | coding    | coding    |
| MSTRG. 211468. 1  | CPXM1        | XLOC_217755 | 272 coding   | noncoding | noncoding | noncoding |
| MSTRG. 211677. 1  | PTPRA        | XLOC_217769 | 292 coding   | noncoding | noncoding | noncoding |
| MSTRG. 211590. 1  | SLC4A11      | XLOC_217788 | 278 coding   | noncoding | noncoding | noncoding |
| MSTRG. 211658. 1  | C20orf194    | XLOC_217793 | 265 coding   | noncoding | noncoding | noncoding |
| NM_020746. 5      | MAVS         | XLOC_217827 | 11731 coding | coding    | coding    | coding    |
| MSTRG. 211836. 6  | PANK2        | XLOC_217828 | 13217 coding | coding    | coding    | noncoding |
| MSTRG. 211759. 1  |              | XLOC_217846 | 322 coding   | noncoding | noncoding | noncoding |
| MSTRG. 211822. 1  |              | XLOC_217870 | 272 coding   | noncoding | noncoding | noncoding |
| MSTRG. 211862. 1  |              | XLOC_217889 | 413 coding   | noncoding | noncoding | noncoding |
| MSTRG. 211886. 1  | GPCPD1       | XLOC_217895 | 9614 coding  | coding    | coding    | noncoding |

|                  |              |             |             |           |           |           |
|------------------|--------------|-------------|-------------|-----------|-----------|-----------|
| MSTRG. 211869. 1 |              | XLOC_217898 | 289 coding  | noncoding | noncoding | noncoding |
| MSTRG. 211874. 1 |              | XLOC_217900 | 283 coding  | noncoding | noncoding | noncoding |
| MSTRG. 211999. 1 | LRRN4        | XLOC_217916 | 222 coding  | noncoding | noncoding | noncoding |
| MSTRG. 211912. 1 | FERMT1       | XLOC_217919 | 247 coding  | noncoding | noncoding | noncoding |
| MSTRG. 211913. 1 |              | XLOC_217923 | 280 coding  | noncoding | noncoding | noncoding |
| MSTRG. 211923. 1 |              | XLOC_217926 | 282 coding  | noncoding | noncoding | noncoding |
| MSTRG. 211952. 1 |              | XLOC_217943 | 268 coding  | noncoding | noncoding | noncoding |
| MSTRG. 211978. 1 |              | XLOC_217958 | 276 coding  | noncoding | coding    | noncoding |
| MSTRG. 212009. 2 | TMX4         | XLOC_217963 | 3562 coding | coding    | coding    | noncoding |
| MSTRG. 212006. 1 |              | XLOC_217966 | 305 coding  | noncoding | noncoding | noncoding |
| NM_015192. 4     | PLCB1        | XLOC_217968 | 7088 coding | coding    | coding    | coding    |
| MSTRG. 212478. 1 | PLCB1        | XLOC_218045 | 238 coding  | coding    | noncoding | noncoding |
| MSTRG. 212027. 1 |              | XLOC_218055 | 609 coding  | noncoding | noncoding | noncoding |
| MSTRG. 212090. 1 | SNAP25-AS1   | XLOC_218078 | 306 coding  | noncoding | noncoding | noncoding |
| MSTRG. 212094. 1 | SNAP25       | XLOC_218082 | 225 coding  | noncoding | noncoding | noncoding |
| MSTRG. 212069. 1 |              | XLOC_218084 | 526 coding  | noncoding | noncoding | noncoding |
| MSTRG. 212068. 1 |              | XLOC_218087 | 287 coding  | coding    | noncoding | noncoding |
| MSTRG. 212076. 1 |              | XLOC_218090 | 214 coding  | noncoding | noncoding | noncoding |
| MSTRG. 212126. 1 |              | XLOC_218141 | 242 coding  | noncoding | noncoding | noncoding |
| MSTRG. 212154. 1 | LOC105372529 | XLOC_218152 | 213 coding  | noncoding | noncoding | noncoding |
| MSTRG. 212216. 1 |              | XLOC_218177 | 231 coding  | noncoding | noncoding | noncoding |
| MSTRG. 212227. 1 |              | XLOC_218184 | 247 coding  | noncoding | noncoding | noncoding |
| MSTRG. 212237. 1 |              | XLOC_218191 | 201 coding  | coding    | noncoding | noncoding |
| MSTRG. 212306. 1 |              | XLOC_218219 | 233 coding  | noncoding | noncoding | noncoding |
| NM_001352406. 2  | NDUFAF5      | XLOC_218233 | 5469 coding | coding    | coding    | coding    |
| MSTRG. 212492. 1 | MACROD2      | XLOC_218239 | 311 coding  | noncoding | noncoding | noncoding |
| MSTRG. 212519. 1 | MACROD2      | XLOC_218253 | 285 coding  | noncoding | noncoding | noncoding |
| MSTRG. 212563. 1 | MACROD2      | XLOC_218269 | 273 coding  | noncoding | noncoding | noncoding |
| MSTRG. 212340. 1 |              | XLOC_218287 | 235 coding  | noncoding | noncoding | noncoding |
| MSTRG. 212600. 1 |              | XLOC_218318 | 284 coding  | noncoding | noncoding | noncoding |
| NM_002594. 5     | PCSK2        | XLOC_218324 | 4691 coding | coding    | coding    | coding    |
| MSTRG. 212662. 1 |              | XLOC_218365 | 297 coding  | noncoding | noncoding | noncoding |
| MSTRG. 212665. 1 | OVOL2        | XLOC_218366 | 290 coding  | noncoding | noncoding | noncoding |
| NR_028402. 2     | KAT14        | XLOC_218368 | 3152 coding | coding    | coding    | coding    |
| MSTRG. 212719. 1 |              | XLOC_218372 | 209 coding  | noncoding | noncoding | noncoding |
| MSTRG. 212721. 1 |              | XLOC_218373 | 325 coding  | noncoding | noncoding | noncoding |
| MSTRG. 212744. 1 | LOC105372550 | XLOC_218377 | 275 coding  | noncoding | noncoding | noncoding |
| MSTRG. 212728. 1 |              | XLOC_218379 | 240 coding  | coding    | noncoding | noncoding |
| MSTRG. 212729. 1 |              | XLOC_218380 | 229 coding  | noncoding | noncoding | noncoding |
| MSTRG. 212772. 1 | SEC23B       | XLOC_218401 | 457 coding  | noncoding | noncoding | noncoding |
| MSTRG. 212921. 1 | SLC24A3      | XLOC_218424 | 274 coding  | noncoding | noncoding | noncoding |
| MSTRG. 213056. 1 | SLC24A3      | XLOC_218441 | 244 coding  | noncoding | noncoding | noncoding |
| XM_017027888. 1  | RIN2         | XLOC_218449 | 5095 coding | coding    | coding    | coding    |

|                  |              |             |             |           |           |           |
|------------------|--------------|-------------|-------------|-----------|-----------|-----------|
| MSTRG. 212883. 1 |              | XLOC_218473 | 227 coding  | noncoding | noncoding | noncoding |
| MSTRG. 212894. 1 |              | XLOC_218480 | 376 coding  | noncoding | noncoding | noncoding |
| XM_011529299. 3  | KIZ          | XLOC_218486 | 2138 coding | noncoding | coding    | coding    |
| MSTRG. 212911. 1 | KIZ          | XLOC_218490 | 286 coding  | noncoding | noncoding | noncoding |
| MSTRG. 212917. 1 | KIZ          | XLOC_218495 | 262 coding  | noncoding | noncoding | noncoding |
| MSTRG. 213112. 1 |              | XLOC_218527 | 306 coding  | noncoding | noncoding | noncoding |
| MSTRG. 213113. 1 |              | XLOC_218528 | 207 coding  | coding    | noncoding | noncoding |
| MSTRG. 213163. 1 | LOC105372564 | XLOC_218541 | 246 coding  | noncoding | noncoding | noncoding |
| MSTRG. 213172. 1 |              | XLOC_218546 | 270 coding  | noncoding | noncoding | noncoding |
| MSTRG. 213173. 1 |              | XLOC_218547 | 281 coding  | noncoding | noncoding | noncoding |
| MSTRG. 213193. 1 |              | XLOC_218566 | 263 coding  | noncoding | noncoding | noncoding |
| MSTRG. 213208. 1 | LOC100505664 | XLOC_218569 | 235 coding  | noncoding | noncoding | noncoding |
| MSTRG. 213205. 1 |              | XLOC_218572 | 297 coding  | noncoding | noncoding | noncoding |
| MSTRG. 213355. 1 | GZF1         | XLOC_218580 | 9773 coding | coding    | coding    | coding    |
| MSTRG. 213332. 1 |              | XLOC_218596 | 259 coding  | noncoding | noncoding | noncoding |
| MSTRG. 213365. 1 |              | XLOC_218599 | 314 coding  | noncoding | noncoding | noncoding |
| XM_017028069. 2  | SYNDIG1      | XLOC_218606 | 5369 coding | noncoding | coding    | coding    |
| MSTRG. 213399. 1 | SYNDIG1      | XLOC_218608 | 310 coding  | coding    | noncoding | noncoding |
| MSTRG. 213384. 1 |              | XLOC_218614 | 244 coding  | noncoding | noncoding | noncoding |
| MSTRG. 213437. 1 |              | XLOC_218637 | 315 coding  | noncoding | noncoding | noncoding |
| MSTRG. 213451. 1 |              | XLOC_218658 | 276 coding  | noncoding | noncoding | noncoding |
| NR_026713. 1     | FAM182A      | XLOC_218680 | 5111 coding | noncoding | coding    | coding    |
| MSTRG. 213574. 1 |              | XLOC_218697 | 210 coding  | noncoding | noncoding | noncoding |
| MSTRG. 213594. 1 |              | XLOC_218703 | 664 coding  | noncoding | noncoding | noncoding |
| MSTRG. 213617. 1 |              | XLOC_218708 | 309 coding  | noncoding | noncoding | noncoding |
| MSTRG. 213630. 1 |              | XLOC_218717 | 257 coding  | noncoding | noncoding | noncoding |
| MSTRG. 213633. 1 |              | XLOC_218719 | 281 coding  | noncoding | noncoding | noncoding |
| MSTRG. 213599. 1 |              | XLOC_218724 | 285 coding  | noncoding | noncoding | noncoding |
| MSTRG. 213646. 1 |              | XLOC_218734 | 263 coding  | noncoding | noncoding | noncoding |
| MSTRG. 213669. 1 |              | XLOC_218748 | 283 coding  | noncoding | noncoding | noncoding |
| MSTRG. 213681. 1 | COX4I2       | XLOC_218760 | 275 coding  | noncoding | noncoding | noncoding |
| MSTRG. 213703. 1 | TPX2         | XLOC_218764 | 223 coding  | noncoding | noncoding | noncoding |
| NM_033118. 3     | MYLK2        | XLOC_218765 | 2793 coding | coding    | coding    | coding    |
| MSTRG. 213739. 1 | HCK          | XLOC_218772 | 229 coding  | noncoding | noncoding | noncoding |
| MSTRG. 213744. 1 | HCK          | XLOC_218777 | 221 coding  | noncoding | noncoding | noncoding |
| MSTRG. 213730. 1 | PLAGL2       | XLOC_218790 | 686 coding  | noncoding | noncoding | noncoding |
| MSTRG. 213722. 1 |              | XLOC_218793 | 239 coding  | noncoding | noncoding | noncoding |
| MSTRG. 213754. 1 | KIF3B        | XLOC_218795 | 244 coding  | noncoding | noncoding | noncoding |
| MSTRG. 213755. 1 | KIF3B        | XLOC_218796 | 288 coding  | noncoding | noncoding | noncoding |
| MSTRG. 213838. 1 | ASXL1        | XLOC_218799 | 291 coding  | noncoding | noncoding | noncoding |
| MSTRG. 213839. 1 | ASXL1        | XLOC_218800 | 293 coding  | noncoding | noncoding | noncoding |
| MSTRG. 213841. 1 | ASXL1        | XLOC_218802 | 232 coding  | noncoding | noncoding | noncoding |
| NR_110619. 1     | LOC101929698 | XLOC_218806 | 1771 coding | noncoding | noncoding | noncoding |

|                  |                 |             |             |           |           |           |
|------------------|-----------------|-------------|-------------|-----------|-----------|-----------|
| MSTRG. 213757. 1 | NOL4L-DT        | XLOC_218808 | 289 coding  | noncoding | noncoding | noncoding |
| MSTRG. 213761. 1 | C20orf203       | XLOC_218810 | 271 coding  | noncoding | noncoding | noncoding |
| MSTRG. 213764. 1 |                 | XLOC_218812 | 987 coding  | coding    | noncoding | noncoding |
| MSTRG. 213766. 1 |                 | XLOC_218815 | 229 coding  | noncoding | noncoding | noncoding |
| NM_175850. 2     | DNMT3B          | XLOC_218816 | 4255 coding | coding    | coding    | coding    |
| XM_024451882. 1  | EFCAB8          | XLOC_218820 | 8489 coding | coding    | coding    | coding    |
| MSTRG. 213808. 1 | EFCAB8          | XLOC_218823 | 662 coding  | noncoding | noncoding | noncoding |
| MSTRG. 213780. 1 | SUN5            | XLOC_218826 | 280 coding  | noncoding | noncoding | noncoding |
| MSTRG. 213783. 1 | SUN5            | XLOC_218828 | 276 coding  | noncoding | noncoding | noncoding |
| MSTRG. 213788. 1 | BPIFA2          | XLOC_218836 | 254 coding  | noncoding | noncoding | noncoding |
| MSTRG. 213817. 1 |                 | XLOC_218846 | 307 coding  | noncoding | noncoding | noncoding |
| MSTRG. 213824. 1 |                 | XLOC_218851 | 318 coding  | noncoding | noncoding | noncoding |
| MSTRG. 213895. 1 | ZNF341          | XLOC_218871 | 419 coding  | noncoding | noncoding | noncoding |
| MSTRG. 213906. 1 |                 | XLOC_218894 | 259 coding  | noncoding | noncoding | noncoding |
| MSTRG. 213914. 1 | ASIP            | XLOC_218898 | 284 coding  | noncoding | noncoding | noncoding |
| XM_005260570. 1  | ITCH            | XLOC_218902 | 6317 coding | coding    | coding    | coding    |
| XM_011529079. 1  | ITCH            | XLOC_218902 | 6337 coding | coding    | coding    | coding    |
| MSTRG. 213957. 1 | ITCH            | XLOC_218906 | 735 coding  | noncoding | noncoding | noncoding |
| MSTRG. 213950. 1 | DYNLRB1         | XLOC_218914 | 280 coding  | noncoding | noncoding | noncoding |
| MSTRG. 213946. 1 |                 | XLOC_218916 | 258 coding  | noncoding | noncoding | noncoding |
| XM_011528947. 2  | MYH7B           | XLOC_218926 | 6640 coding | coding    | coding    | coding    |
| MSTRG. 214047. 1 | MMP24-AS1-EDEM2 | XLOC_218938 | 310 coding  | noncoding | noncoding | noncoding |
| MSTRG. 214076. 1 | FER1L4          | XLOC_218968 | 295 coding  | noncoding | noncoding | noncoding |
| MSTRG. 214127. 1 | PHF20           | XLOC_218978 | 215 coding  | noncoding | noncoding | noncoding |
| MSTRG. 214132. 1 | PHF20           | XLOC_218983 | 278 coding  | noncoding | noncoding | noncoding |
| MSTRG. 214135. 1 | PHF20           | XLOC_218986 | 277 coding  | noncoding | noncoding | noncoding |
| MSTRG. 214136. 1 | PHF20           | XLOC_218987 | 255 coding  | noncoding | noncoding | noncoding |
| NM_001304367. 2  | CNBD2           | XLOC_218991 | 2552 coding | noncoding | coding    | noncoding |
| MSTRG. 214142. 1 | CNBD2           | XLOC_218992 | 491 coding  | noncoding | noncoding | noncoding |
| MSTRG. 214147. 1 | EPB41L1         | XLOC_218996 | 246 coding  | noncoding | noncoding | noncoding |
| MSTRG. 214149. 1 | EPB41L1         | XLOC_218997 | 371 coding  | noncoding | noncoding | noncoding |
| XM_011528691. 3  | DLGAP4          | XLOC_219004 | 3870 coding | coding    | coding    | coding    |
| MSTRG. 214205. 1 | DLGAP4          | XLOC_219012 | 755 coding  | noncoding | noncoding | noncoding |
| NM_006097. 5     | MYL9            | XLOC_219020 | 2786 coding | coding    | coding    | coding    |
| NM_021809. 7     | TGIF2           | XLOC_219022 | 3416 coding | coding    | coding    | coding    |
| NM_018840. 5     | RAB51F          | XLOC_219022 | 1069 coding | coding    | coding    | coding    |
| NM_001199534. 2  | RAB51F          | XLOC_219022 | 1097 coding | coding    | coding    | coding    |
| MSTRG. 214181. 1 | SOGA1           | XLOC_219036 | 263 coding  | noncoding | noncoding | noncoding |
| MSTRG. 214229. 4 | TLDC2           | XLOC_219043 | 2767 coding | coding    | coding    | coding    |
| MSTRG. 214224. 1 |                 | XLOC_219044 | 539 coding  | noncoding | noncoding | noncoding |
| MSTRG. 214254. 1 | MROH8           | XLOC_219053 | 279 coding  | noncoding | noncoding | noncoding |
| MSTRG. 214264. 1 |                 | XLOC_219066 | 296 coding  | noncoding | noncoding | noncoding |
| MSTRG. 214265. 1 | LOC105372606    | XLOC_219067 | 431 coding  | noncoding | noncoding | noncoding |

|                   |              |             |             |           |           |           |
|-------------------|--------------|-------------|-------------|-----------|-----------|-----------|
| MSTRG. 214293. 1  |              | XLOC_219086 | 733 coding  | noncoding | noncoding | noncoding |
| NM_001281495. 1   | CTNNBL1      | XLOC_219089 | 2077 coding | coding    | coding    | coding    |
| MSTRG. 214327. 1  | CTNNBL1      | XLOC_219094 | 528 coding  | noncoding | noncoding | noncoding |
| NM_021215. 4      | RPRD1B       | XLOC_219106 | 3672 coding | coding    | coding    | coding    |
| MSTRG. 214334. 1  |              | XLOC_219113 | 293 coding  | noncoding | noncoding | noncoding |
| MSTRG. 214344. 1  | KIAA1755     | XLOC_219117 | 393 coding  | noncoding | noncoding | noncoding |
| MSTRG. 214346. 1  | KIAA1755     | XLOC_219118 | 268 coding  | noncoding | noncoding | noncoding |
| MSTRG. 214375. 1  |              | XLOC_219129 | 232 coding  | noncoding | noncoding | noncoding |
| MSTRG. 214385. 1  |              | XLOC_219133 | 286 coding  | noncoding | noncoding | noncoding |
| XM_005260464. 3   | RALGAPB      | XLOC_219135 | 8684 coding | noncoding | coding    | coding    |
| NM_001164431. 2   | ARHGAP40     | XLOC_219150 | 2964 coding | coding    | coding    | coding    |
| MSTRG. 214434. 1  | PPP1R16B     | XLOC_219165 | 230 coding  | noncoding | noncoding | noncoding |
| XM_017028088. 1   | FAM83D       | XLOC_219166 | 2312 coding | coding    | coding    | coding    |
| MSTRG. 214453. 1  |              | XLOC_219204 | 250 coding  | noncoding | noncoding | noncoding |
| MSTRG. 214520. 1  | LOC102724968 | XLOC_219228 | 233 coding  | noncoding | noncoding | noncoding |
| MSTRG. 214534. 1  |              | XLOC_219240 | 295 coding  | noncoding | noncoding | noncoding |
| MSTRG. 214760. 1  | TOP1         | XLOC_219255 | 291 coding  | noncoding | noncoding | noncoding |
| MSTRG. 214543. 1  |              | XLOC_219285 | 301 coding  | noncoding | noncoding | noncoding |
| MSTRG. 215014. 4  | CHD6         | XLOC_219290 | 2872 coding | coding    | coding    | coding    |
| MSTRG. 214833. 1  | PTPRT        | XLOC_219314 | 263 coding  | noncoding | noncoding | noncoding |
| MSTRG. 214846. 1  | PTPRT        | XLOC_219321 | 315 coding  | noncoding | noncoding | noncoding |
| MSTRG. 214847. 1  | PTPRT        | XLOC_219322 | 262 coding  | noncoding | noncoding | noncoding |
| MSTRG. 214857. 1  |              | XLOC_219335 | 313 coding  | noncoding | noncoding | noncoding |
| MSTRG. 214879. 1  |              | XLOC_219341 | 450 coding  | noncoding | noncoding | noncoding |
| MSTRG. 214893. 1  | LINC01728    | XLOC_219349 | 220 coding  | noncoding | noncoding | noncoding |
| MSTRG. 214921. 1  | JPH2         | XLOC_219363 | 286 coding  | noncoding | noncoding | noncoding |
| MSTRG. 214925. 1  |              | XLOC_219370 | 286 coding  | noncoding | noncoding | noncoding |
| NM_001256738. 1   | GDAP1L1      | XLOC_219372 | 2645 coding | coding    | coding    | coding    |
| MSTRG. 214963. 1  | LOC105372629 | XLOC_219387 | 222 coding  | noncoding | noncoding | noncoding |
| MSTRG. 214966. 1  | HNFB4A       | XLOC_219389 | 298 coding  | noncoding | noncoding | noncoding |
| MSTRG. 214959. 1  | LINC01620    | XLOC_219394 | 294 coding  | noncoding | noncoding | noncoding |
| MSTRG. 215007. 1  | PKIG         | XLOC_219407 | 257 coding  | noncoding | noncoding | noncoding |
| MSTRG. 215009. 3  | ADA          | XLOC_219408 | 339 coding  | coding    | coding    | noncoding |
| MSTRG. 214985. 1  |              | XLOC_219411 | 316 coding  | noncoding | noncoding | noncoding |
| MSTRG. 215141. 10 | STK4         | XLOC_219423 | 4521 coding | coding    | coding    | coding    |
| MSTRG. 215039. 1  |              | XLOC_219444 | 254 coding  | noncoding | noncoding | noncoding |
| XR_001754624. 1   | LINC02597    | XLOC_219452 | 4961 coding | noncoding | noncoding | coding    |
| NM_033542. 4      | SYS1         | XLOC_219467 | 2728 coding | coding    | coding    | coding    |
| MSTRG. 215111. 1  | WFDC11       | XLOC_219479 | 879 coding  | coding    | noncoding | noncoding |
| MSTRG. 215113. 1  | WFDC11       | XLOC_219480 | 258 coding  | coding    | noncoding | noncoding |
| MSTRG. 215163. 1  | WFDC3        | XLOC_219482 | 232 coding  | noncoding | noncoding | noncoding |
| MSTRG. 215165. 1  | WFDC3        | XLOC_219484 | 236 coding  | noncoding | noncoding | noncoding |
| NM_181801. 4      | UBE2C        | XLOC_219488 | 920 coding  | coding    | coding    | coding    |

|                |              |             |             |           |           |           |
|----------------|--------------|-------------|-------------|-----------|-----------|-----------|
| NR_037628.1    | ZSWIM3       | XLOC_219491 | 2973 coding | coding    | coding    | coding    |
| XM_017028013.2 | PCIF1        | XLOC_219497 | 2852 coding | coding    | coding    | coding    |
| MSTRG.215208.6 | ZNF335       | XLOC_219498 | 576 coding  | noncoding | coding    | noncoding |
| NM_001134771.2 | SLC12A5      | XLOC_219500 | 6045 coding | coding    | coding    | coding    |
| MSTRG.215195.1 | CDH22        | XLOC_219506 | 291 coding  | coding    | noncoding | noncoding |
| MSTRG.215192.1 |              | XLOC_219511 | 261 coding  | noncoding | noncoding | noncoding |
| NR_146919.1    | LOC105372633 | XLOC_219516 | 1872 coding | noncoding | noncoding | noncoding |
| MSTRG.215227.1 | SLC2A10      | XLOC_219536 | 279 coding  | noncoding | noncoding | noncoding |
| MSTRG.215285.1 | EYA2         | XLOC_219544 | 302 coding  | noncoding | noncoding | noncoding |
| MSTRG.215291.1 | EYA2         | XLOC_219547 | 299 coding  | noncoding | noncoding | noncoding |
| MSTRG.215292.1 | EYA2         | XLOC_219548 | 244 coding  | noncoding | noncoding | noncoding |
| MSTRG.215295.1 | EYA2         | XLOC_219550 | 259 coding  | noncoding | noncoding | noncoding |
| MSTRG.215298.1 | EYA2         | XLOC_219552 | 243 coding  | noncoding | noncoding | noncoding |
| MSTRG.215314.9 | ZMYND8       | XLOC_219555 | 4995 coding | coding    | coding    | coding    |
| NR_024594.1    | LOC100131496 | XLOC_219556 | 2253 coding | noncoding | coding    | coding    |
| MSTRG.215301.1 |              | XLOC_219560 | 250 coding  | noncoding | noncoding | noncoding |
| MSTRG.215302.1 |              | XLOC_219561 | 260 coding  | noncoding | noncoding | noncoding |
| MSTRG.215305.1 | LINC01754    | XLOC_219562 | 264 coding  | noncoding | noncoding | noncoding |
| MSTRG.215323.1 |              | XLOC_219568 | 352 coding  | noncoding | noncoding | noncoding |
| MSTRG.215325.1 |              | XLOC_219569 | 290 coding  | coding    | noncoding | noncoding |
| MSTRG.215326.1 |              | XLOC_219570 | 236 coding  | noncoding | noncoding | noncoding |
| MSTRG.215355.1 |              | XLOC_219588 | 288 coding  | noncoding | noncoding | noncoding |
| MSTRG.215364.1 |              | XLOC_219593 | 223 coding  | noncoding | noncoding | noncoding |
| MSTRG.215397.9 | PREX1        | XLOC_219598 | 4000 coding | coding    | coding    | noncoding |
| MSTRG.215374.1 |              | XLOC_219599 | 225 coding  | noncoding | noncoding | noncoding |
| XM_005260252.3 | ARFGEF2      | XLOC_219600 | 8330 coding | coding    | coding    | coding    |
| MSTRG.215396.1 | CSE1L        | XLOC_219608 | 307 coding  | noncoding | noncoding | noncoding |
| MSTRG.215522.7 | ZNFX1        | XLOC_219616 | 2615 coding | coding    | noncoding | coding    |
| MSTRG.215461.1 | KCNB1        | XLOC_219625 | 290 coding  | noncoding | noncoding | noncoding |
| MSTRG.215468.1 | LOC105372651 | XLOC_219631 | 308 coding  | noncoding | noncoding | noncoding |
| MSTRG.215469.1 |              | XLOC_219632 | 291 coding  | noncoding | noncoding | noncoding |
| MSTRG.215485.3 | B4GALT5      | XLOC_219635 | 4509 coding | coding    | coding    | coding    |
| MSTRG.215557.1 | SLC9A8       | XLOC_219645 | 207 coding  | noncoding | noncoding | noncoding |
| MSTRG.215539.1 |              | XLOC_219656 | 269 coding  | noncoding | noncoding | noncoding |
| MSTRG.215607.1 |              | XLOC_219685 | 254 coding  | noncoding | noncoding | noncoding |
| MSTRG.215615.1 | PARD6B       | XLOC_219706 | 256 coding  | noncoding | noncoding | noncoding |
| MSTRG.215672.1 | BCAS4        | XLOC_219708 | 223 coding  | noncoding | noncoding | noncoding |
| MSTRG.215642.1 |              | XLOC_219716 | 274 coding  | noncoding | noncoding | noncoding |
| MSTRG.215648.1 |              | XLOC_219720 | 285 coding  | noncoding | noncoding | noncoding |
| MSTRG.215664.1 |              | XLOC_219724 | 273 coding  | noncoding | noncoding | noncoding |
| MSTRG.215714.1 | ATP9A        | XLOC_219739 | 243 coding  | noncoding | noncoding | noncoding |
| MSTRG.215717.1 | ATP9A        | XLOC_219741 | 310 coding  | noncoding | noncoding | noncoding |
| MSTRG.215721.1 | ATP9A        | XLOC_219744 | 238 coding  | noncoding | noncoding | noncoding |

|                  |                |             |             |           |           |           |
|------------------|----------------|-------------|-------------|-----------|-----------|-----------|
| MSTRG. 215705. 1 |                | XLOC_219748 | 274 coding  | noncoding | noncoding | noncoding |
| MSTRG. 215742. 1 | LOC105372666   | XLOC_219757 | 214 coding  | noncoding | noncoding | noncoding |
| MSTRG. 216187. 1 | LOC105372669   | XLOC_219808 | 300 coding  | noncoding | noncoding | noncoding |
| MSTRG. 215792. 1 |                | XLOC_219810 | 366 coding  | noncoding | noncoding | noncoding |
| NR_110051. 1     | LOC101927770   | XLOC_219816 | 1947 coding | noncoding | coding    | coding    |
| MSTRG. 215802. 1 |                | XLOC_219818 | 240 coding  | noncoding | noncoding | noncoding |
| MSTRG. 215804. 1 |                | XLOC_219819 | 302 coding  | noncoding | noncoding | noncoding |
| MSTRG. 215861. 1 | BCAS1          | XLOC_219831 | 272 coding  | noncoding | noncoding | noncoding |
| MSTRG. 215873. 1 |                | XLOC_219845 | 254 coding  | noncoding | noncoding | noncoding |
| MSTRG. 215876. 1 |                | XLOC_219848 | 300 coding  | noncoding | noncoding | noncoding |
| MSTRG. 215908. 1 |                | XLOC_219858 | 291 coding  | coding    | noncoding | noncoding |
| MSTRG. 215914. 1 |                | XLOC_219862 | 318 coding  | noncoding | noncoding | noncoding |
| MSTRG. 215918. 1 |                | XLOC_219863 | 243 coding  | noncoding | noncoding | noncoding |
| MSTRG. 215931. 1 | LOC105372677   | XLOC_219868 | 569 coding  | noncoding | noncoding | noncoding |
| MSTRG. 215942. 1 |                | XLOC_219879 | 308 coding  | noncoding | noncoding | noncoding |
| NM_019888. 3     | MC3R           | XLOC_219882 | 1084 coding | coding    | coding    | coding    |
| XM_006723831. 3  | CASS4          | XLOC_219889 | 4479 coding | coding    | coding    | coding    |
| MSTRG. 216025. 1 | CASS4          | XLOC_219895 | 290 coding  | noncoding | noncoding | noncoding |
| XR_001754270. 1  | FAM209B        | XLOC_219901 | 3847 coding | coding    | coding    | coding    |
| MSTRG. 215954. 1 |                | XLOC_219904 | 474 coding  | noncoding | noncoding | noncoding |
| MSTRG. 215965. 1 |                | XLOC_219908 | 254 coding  | noncoding | noncoding | noncoding |
| MSTRG. 215968. 1 |                | XLOC_219910 | 278 coding  | noncoding | noncoding | noncoding |
| MSTRG. 215970. 1 |                | XLOC_219911 | 282 coding  | noncoding | noncoding | noncoding |
| MSTRG. 215981. 1 |                | XLOC_219913 | 270 coding  | noncoding | noncoding | noncoding |
| MSTRG. 216128. 1 | VAPB           | XLOC_219980 | 296 coding  | noncoding | noncoding | noncoding |
| MSTRG. 216142. 1 | STX16          | XLOC_219991 | 308 coding  | noncoding | noncoding | noncoding |
| NM_001077488. 4  | GNAS           | XLOC_219996 | 1854 coding | coding    | coding    | coding    |
| MSTRG. 216228. 1 |                | XLOC_220043 | 247 coding  | noncoding | noncoding | noncoding |
| MSTRG. 216232. 1 |                | XLOC_220045 | 293 coding  | noncoding | noncoding | noncoding |
| XM_017027995. 2  | CDH26          | XLOC_220083 | 7889 coding | coding    | coding    | coding    |
| NR_046099. 1     | MIR646HG       | XLOC_220097 | 2043 coding | noncoding | coding    | noncoding |
| MSTRG. 216371. 1 |                | XLOC_220130 | 290 coding  | noncoding | noncoding | noncoding |
| MSTRG. 216408. 1 | CDH4           | XLOC_220148 | 213 coding  | noncoding | noncoding | noncoding |
| XM_005260389. 3  | SS18L1         | XLOC_220178 | 2894 coding | coding    | coding    | coding    |
| MSTRG. 216488. 1 | MIR1-1HG-AS1   | XLOC_220200 | 270 coding  | noncoding | noncoding | noncoding |
| MSTRG. 216495. 1 |                | XLOC_220208 | 268 coding  | noncoding | noncoding | noncoding |
| XR_936574. 2     | ARFGAP1        | XLOC_220257 | 3912 coding | coding    | coding    | coding    |
| XM_011528940. 1  | COL20A1        | XLOC_220259 | 8142 coding | coding    | coding    | coding    |
| MSTRG. 216680. 1 | LOC105372725   | XLOC_220266 | 285 coding  | noncoding | noncoding | noncoding |
| NR_037882. 1     | RTEL1-TNFRSF6B | XLOC_220280 | 5772 coding | coding    | coding    | coding    |
| MSTRG. 216740. 6 | RTEL1-TNFRSF6B | XLOC_220280 | 514 coding  | coding    | coding    | noncoding |
| MSTRG. 216742. 1 | RTEL1-TNFRSF6B | XLOC_220281 | 253 coding  | noncoding | noncoding | noncoding |
| MSTRG. 216736. 1 | ZBTB46         | XLOC_220291 | 228 coding  | noncoding | noncoding | noncoding |

|                   |           |             |             |           |           |           |
|-------------------|-----------|-------------|-------------|-----------|-----------|-----------|
| MSTRG. 216765. 1  | TPD52L2   | XLOC_220301 | 280 coding  | noncoding | noncoding | noncoding |
| MSTRG. 216770. 1  | DNAJC5    | XLOC_220305 | 283 coding  | noncoding | noncoding | noncoding |
| MSTRG. 216789. 1  | PRPF6     | XLOC_220316 | 557 coding  | noncoding | noncoding | noncoding |
| MSTRG. 211157. 1  |           | XLOC_220326 | 269 coding  | noncoding | noncoding | noncoding |
| MSTRG. 211160. 1  |           | XLOC_220327 | 266 coding  | noncoding | noncoding | noncoding |
| MSTRG. 211162. 1  |           | XLOC_220329 | 346 coding  | noncoding | noncoding | noncoding |
| MSTRG. 211192. 1  |           | XLOC_220337 | 242 coding  | noncoding | noncoding | noncoding |
| MSTRG. 211199. 1  |           | XLOC_220344 | 253 coding  | noncoding | noncoding | noncoding |
| MSTRG. 211298. 1  | RSPO4     | XLOC_220403 | 265 coding  | noncoding | noncoding | noncoding |
| XM_017027957. 2   | NSFL1C    | XLOC_220463 | 3778 coding | coding    | coding    | coding    |
| MSTRG. 211411. 1  |           | XLOC_220556 | 295 coding  | noncoding | noncoding | noncoding |
| MSTRG. 211432. 1  |           | XLOC_220566 | 206 coding  | noncoding | noncoding | noncoding |
| MSTRG. 211459. 1  | ZNF343    | XLOC_220573 | 211 coding  | noncoding | noncoding | noncoding |
| MSTRG. 211472. 1  | EBF4      | XLOC_220587 | 276 coding  | noncoding | noncoding | noncoding |
| MSTRG. 211668. 3  | PTPRA     | XLOC_220595 | 3432 coding | coding    | coding    | coding    |
| MSTRG. 211668. 12 | PTPRA     | XLOC_220595 | 3471 coding | coding    | coding    | coding    |
| XM_011529267. 2   | AVP       | XLOC_220600 | 2095 coding | coding    | coding    | coding    |
| NM_001009984. 2   | C20orf194 | XLOC_220607 | 6909 coding | noncoding | coding    | coding    |
| MSTRG. 211654. 1  | C20orf194 | XLOC_220608 | 318 coding  | noncoding | noncoding | noncoding |
| MSTRG. 211657. 1  | C20orf194 | XLOC_220611 | 265 coding  | noncoding | noncoding | noncoding |
| MSTRG. 211592. 1  |           | XLOC_220615 | 304 coding  | noncoding | noncoding | noncoding |
| MSTRG. 211833. 1  |           | XLOC_220630 | 222 coding  | noncoding | noncoding | noncoding |
| NM_007219. 5      | RNF24     | XLOC_220633 | 7620 coding | coding    | noncoding | noncoding |
| MSTRG. 211743. 1  | ADRA1D    | XLOC_220642 | 297 coding  | noncoding | noncoding | noncoding |
| MSTRG. 211769. 3  | PRNP      | XLOC_220650 | 2458 coding | coding    | coding    | noncoding |
| XM_011529412. 2   | RASSF2    | XLOC_220654 | 5348 coding | coding    | coding    | coding    |
| XM_017028151. 1   | RASSF2    | XLOC_220654 | 5597 coding | coding    | coding    | coding    |
| MSTRG. 211805. 4  | CDS2      | XLOC_220667 | 5568 coding | coding    | coding    | noncoding |
| MSTRG. 211805. 3  | CDS2      | XLOC_220667 | 5967 coding | coding    | coding    | noncoding |
| MSTRG. 211893. 1  | GPCPD1    | XLOC_220706 | 222 coding  | noncoding | noncoding | noncoding |
| MSTRG. 211867. 1  |           | XLOC_220717 | 224 coding  | noncoding | noncoding | noncoding |
| XM_024451935. 1   | FERMT1    | XLOC_220737 | 5219 coding | coding    | coding    | coding    |
| MSTRG. 211911. 1  | FERMT1    | XLOC_220739 | 247 coding  | noncoding | noncoding | noncoding |
| MSTRG. 211936. 1  |           | XLOC_220752 | 251 coding  | noncoding | noncoding | noncoding |
| MSTRG. 211937. 1  |           | XLOC_220753 | 312 coding  | noncoding | noncoding | noncoding |
| MSTRG. 211949. 1  |           | XLOC_220760 | 285 coding  | noncoding | noncoding | noncoding |
| MSTRG. 211953. 1  |           | XLOC_220762 | 275 coding  | noncoding | noncoding | noncoding |
| MSTRG. 211959. 1  | LINC01428 | XLOC_220765 | 280 coding  | noncoding | noncoding | noncoding |
| MSTRG. 211977. 1  |           | XLOC_220775 | 244 coding  | noncoding | noncoding | noncoding |
| MSTRG. 212004. 1  |           | XLOC_220778 | 257 coding  | noncoding | noncoding | noncoding |
| MSTRG. 212007. 1  |           | XLOC_220788 | 305 coding  | noncoding | noncoding | noncoding |
| XM_017027964. 1   | PAK5      | XLOC_220812 | 5227 coding | coding    | coding    | coding    |
| MSTRG. 212035. 1  |           | XLOC_220819 | 320 coding  | coding    | noncoding | noncoding |

|                  |              |             |             |           |           |           |
|------------------|--------------|-------------|-------------|-----------|-----------|-----------|
| MSTRG. 212088. 1 | SNAP25-AS1   | XLOC_220831 | 290 coding  | noncoding | noncoding | noncoding |
| MSTRG. 212107. 1 | LOC107985398 | XLOC_220854 | 251 coding  | noncoding | noncoding | noncoding |
| MSTRG. 212121. 1 |              | XLOC_220863 | 253 coding  | noncoding | noncoding | noncoding |
| MSTRG. 212139. 1 |              | XLOC_220873 | 292 coding  | noncoding | noncoding | noncoding |
| MSTRG. 212158. 1 | LOC105372529 | XLOC_220884 | 321 coding  | coding    | noncoding | noncoding |
| MSTRG. 212169. 1 |              | XLOC_220891 | 258 coding  | noncoding | noncoding | noncoding |
| MSTRG. 212181. 1 | LINC00687    | XLOC_220899 | 313 coding  | noncoding | noncoding | noncoding |
| MSTRG. 212220. 1 |              | XLOC_220925 | 239 coding  | coding    | noncoding | noncoding |
| MSTRG. 212222. 1 |              | XLOC_220926 | 325 coding  | noncoding | noncoding | noncoding |
| MSTRG. 212226. 1 |              | XLOC_220927 | 247 coding  | noncoding | noncoding | noncoding |
| MSTRG. 212239. 1 |              | XLOC_220932 | 312 coding  | noncoding | noncoding | noncoding |
| MSTRG. 212244. 1 |              | XLOC_220935 | 315 coding  | noncoding | noncoding | noncoding |
| MSTRG. 212305. 1 |              | XLOC_220974 | 424 coding  | noncoding | noncoding | noncoding |
| MSTRG. 212309. 1 |              | XLOC_220976 | 275 coding  | noncoding | noncoding | noncoding |
| MSTRG. 212520. 1 | MACROD2      | XLOC_221000 | 283 coding  | noncoding | noncoding | noncoding |
| MSTRG. 212542. 1 | MACROD2      | XLOC_221015 | 408 coding  | noncoding | noncoding | noncoding |
| MSTRG. 212488. 1 |              | XLOC_221060 | 311 coding  | noncoding | noncoding | noncoding |
| NM_001278606. 2  | BFSP1        | XLOC_221075 | 2071 coding | noncoding | coding    | coding    |
| MSTRG. 212682. 2 | DSTN         | XLOC_221082 | 2070 coding | coding    | noncoding | noncoding |
| MSTRG. 212622. 1 |              | XLOC_221089 | 334 coding  | noncoding | noncoding | noncoding |
| MSTRG. 212718. 1 |              | XLOC_221103 | 393 coding  | noncoding | coding    | noncoding |
| MSTRG. 212770. 3 | SEC23B       | XLOC_221125 | 1573 coding | coding    | coding    | coding    |
| MSTRG. 212789. 1 |              | XLOC_221139 | 260 coding  | noncoding | noncoding | noncoding |
| MSTRG. 212794. 1 |              | XLOC_221144 | 274 coding  | noncoding | coding    | noncoding |
| MSTRG. 212873. 1 | CFAP61       | XLOC_221335 | 242 coding  | noncoding | noncoding | noncoding |
| MSTRG. 212884. 1 |              | XLOC_221414 | 238 coding  | noncoding | noncoding | noncoding |
| MSTRG. 212895. 1 |              | XLOC_221417 | 461 coding  | noncoding | noncoding | noncoding |
| MSTRG. 213095. 1 | LOC105372558 | XLOC_221427 | 287 coding  | noncoding | noncoding | noncoding |
| XM_024452027. 1  | LOC112268271 | XLOC_221431 | 7425 coding | noncoding | coding    | coding    |
| MSTRG. 213104. 1 | LINC01726    | XLOC_221439 | 319 coding  | noncoding | noncoding | noncoding |
| MSTRG. 213098. 1 |              | XLOC_221440 | 265 coding  | noncoding | noncoding | noncoding |
| MSTRG. 213209. 1 | LOC100505664 | XLOC_221500 | 235 coding  | noncoding | noncoding | noncoding |
| MSTRG. 213201. 1 |              | XLOC_221503 | 227 coding  | noncoding | noncoding | noncoding |
| MSTRG. 213348. 1 |              | XLOC_221537 | 221 coding  | noncoding | noncoding | noncoding |
| MSTRG. 213374. 1 |              | XLOC_221557 | 338 coding  | noncoding | noncoding | noncoding |
| MSTRG. 213400. 1 | SYNDIG1      | XLOC_221562 | 293 coding  | noncoding | noncoding | noncoding |
| MSTRG. 213441. 1 | ACSS1        | XLOC_221580 | 241 coding  | noncoding | noncoding | noncoding |
| MSTRG. 213434. 1 |              | XLOC_221587 | 255 coding  | noncoding | noncoding | noncoding |
| MSTRG. 213447. 1 | LOC105372581 | XLOC_221596 | 248 coding  | noncoding | noncoding | noncoding |
| MSTRG. 213474. 1 | NINL         | XLOC_221601 | 202 coding  | noncoding | noncoding | noncoding |
| MSTRG. 213529. 1 | ZNF337-AS1   | XLOC_221611 | 232 coding  | noncoding | noncoding | noncoding |
| NR_026714. 2     | FAM182B      | XLOC_221629 | 5481 coding | noncoding | coding    | noncoding |
| MSTRG. 213487. 1 |              | XLOC_221632 | 307 coding  | noncoding | noncoding | noncoding |

|                  |              |             |             |           |           |           |
|------------------|--------------|-------------|-------------|-----------|-----------|-----------|
| MSTRG. 213557. 1 |              | XLOC_221670 | 333 coding  | coding    | noncoding | noncoding |
| NR_146067. 1     | FRG1EP       | XLOC_221682 | 3848 coding | coding    | coding    | noncoding |
| MSTRG. 213642. 1 |              | XLOC_221712 | 319 coding  | noncoding | noncoding | noncoding |
| MSTRG. 213645. 1 |              | XLOC_221714 | 263 coding  | noncoding | noncoding | noncoding |
| MSTRG. 213670. 1 |              | XLOC_221722 | 283 coding  | noncoding | noncoding | noncoding |
| NR_134257. 1     | BCL2L1       | XLOC_221731 | 2468 coding | coding    | coding    | coding    |
| MSTRG. 213711. 1 | DUSP15       | XLOC_221744 | 228 coding  | noncoding | noncoding | noncoding |
| MSTRG. 213715. 1 | TTL9         | XLOC_221747 | 290 coding  | noncoding | noncoding | noncoding |
| MSTRG. 213704. 1 |              | XLOC_221751 | 283 coding  | noncoding | noncoding | noncoding |
| MSTRG. 213847. 1 | NOL4L        | XLOC_221766 | 223 coding  | noncoding | noncoding | noncoding |
| MSTRG. 213851. 1 | NOL4L        | XLOC_221770 | 245 coding  | noncoding | noncoding | noncoding |
| NM_182584. 4     | C20orf203    | XLOC_221774 | 5103 coding | coding    | coding    | noncoding |
| MSTRG. 213762. 1 |              | XLOC_221775 | 268 coding  | noncoding | noncoding | noncoding |
| MSTRG. 213782. 1 | SUN5         | XLOC_221792 | 328 coding  | noncoding | coding    | noncoding |
| MSTRG. 213816. 1 |              | XLOC_221801 | 307 coding  | noncoding | noncoding | noncoding |
| MSTRG. 213825. 1 |              | XLOC_221806 | 328 coding  | noncoding | noncoding | noncoding |
| MSTRG. 213830. 1 |              | XLOC_221807 | 211 coding  | noncoding | noncoding | noncoding |
| MSTRG. 213829. 1 |              | XLOC_221808 | 317 coding  | noncoding | noncoding | noncoding |
| MSTRG. 213854. 1 |              | XLOC_221819 | 260 coding  | noncoding | noncoding | noncoding |
| NM_001316363. 2  | EIF2S2       | XLOC_221835 | 2547 coding | coding    | coding    | coding    |
| MSTRG. 213927. 9 | EIF2S2       | XLOC_221835 | 2083 coding | coding    | coding    | coding    |
| MSTRG. 213915. 1 | ASIP         | XLOC_221840 | 284 coding  | noncoding | noncoding | noncoding |
| MSTRG. 213919. 1 | ASIP         | XLOC_221842 | 233 coding  | noncoding | noncoding | noncoding |
| MSTRG. 213923. 1 | AHCY         | XLOC_221846 | 361 coding  | noncoding | noncoding | noncoding |
| MSTRG. 213912. 1 |              | XLOC_221848 | 422 coding  | noncoding | noncoding | noncoding |
| MSTRG. 213971. 1 | PIGU         | XLOC_221860 | 285 coding  | noncoding | noncoding | noncoding |
| MSTRG. 213975. 1 |              | XLOC_221861 | 253 coding  | noncoding | noncoding | noncoding |
| MSTRG. 213994. 1 |              | XLOC_221893 | 307 coding  | noncoding | noncoding | noncoding |
| MSTRG. 214046. 1 | PROCR        | XLOC_221900 | 310 coding  | noncoding | noncoding | noncoding |
| MSTRG. 214087. 1 | CEP250       | XLOC_221923 | 412 coding  | noncoding | noncoding | noncoding |
| MSTRG. 214075. 1 | FER1L4       | XLOC_221933 | 331 coding  | noncoding | noncoding | noncoding |
| MSTRG. 214079. 1 |              | XLOC_221934 | 250 coding  | noncoding | noncoding | noncoding |
| NM_001323424. 2  | RBM39        | XLOC_221948 | 5057 coding | coding    | coding    | coding    |
| MSTRG. 214146. 1 | EPB41L1      | XLOC_221960 | 208 coding  | noncoding | noncoding | noncoding |
| MSTRG. 214148. 1 | EPB41L1      | XLOC_221961 | 236 coding  | noncoding | noncoding | noncoding |
| MSTRG. 214192. 1 | DLGAP4       | XLOC_221968 | 311 coding  | noncoding | noncoding | noncoding |
| MSTRG. 214217. 1 | TGIF2        | XLOC_221977 | 344 coding  | noncoding | noncoding | noncoding |
| MSTRG. 214221. 1 | TGIF2-RAB5IF | XLOC_221979 | 226 coding  | noncoding | noncoding | noncoding |
| MSTRG. 214164. 1 | NDRG3        | XLOC_221985 | 255 coding  | noncoding | noncoding | noncoding |
| MSTRG. 214165. 1 | NDRG3        | XLOC_221986 | 375 coding  | noncoding | noncoding | noncoding |
| MSTRG. 214166. 1 | NDRG3        | XLOC_221987 | 267 coding  | noncoding | noncoding | noncoding |
| MSTRG. 214174. 1 | SOGA1        | XLOC_221990 | 270 coding  | noncoding | noncoding | noncoding |
| MSTRG. 214230. 1 | TLDC2        | XLOC_221992 | 598 coding  | noncoding | noncoding | noncoding |

|                  |              |             |              |           |           |           |
|------------------|--------------|-------------|--------------|-----------|-----------|-----------|
| MSTRG. 214244. 1 | RBL1         | XLOC_222006 | 242 coding   | noncoding | noncoding | noncoding |
| MSTRG. 214298. 1 |              | XLOC_222033 | 240 coding   | noncoding | noncoding | noncoding |
| MSTRG. 214319. 1 | VSTM2L       | XLOC_222041 | 227 coding   | noncoding | coding    | noncoding |
| XM_017028148. 2  | TTI1         | XLOC_222042 | 3434 coding  | noncoding | coding    | coding    |
| MSTRG. 214333. 1 |              | XLOC_222047 | 293 coding   | noncoding | noncoding | noncoding |
| MSTRG. 214337. 1 |              | XLOC_222051 | 258 coding   | coding    | noncoding | noncoding |
| XM_024452011. 1  | KIAA1755     | XLOC_222053 | 6429 coding  | noncoding | coding    | coding    |
| MSTRG. 214351. 1 |              | XLOC_222060 | 309 coding   | noncoding | noncoding | noncoding |
| MSTRG. 214348. 1 |              | XLOC_222061 | 312 coding   | noncoding | noncoding | noncoding |
| MSTRG. 214383. 1 | SNHG17       | XLOC_222068 | 223 coding   | noncoding | noncoding | noncoding |
| MSTRG. 214436. 4 | DHX35        | XLOC_222084 | 1143 coding  | coding    | coding    | noncoding |
| MSTRG. 214732. 1 | LOC102724950 | XLOC_222234 | 236 coding   | noncoding | noncoding | noncoding |
| MSTRG. 214497. 1 |              | XLOC_222267 | 284 coding   | noncoding | noncoding | noncoding |
| MSTRG. 214526. 1 |              | XLOC_222284 | 575 coding   | noncoding | noncoding | noncoding |
| MSTRG. 214540. 1 | LOC100128988 | XLOC_222291 | 206 coding   | noncoding | noncoding | noncoding |
| MSTRG. 214787. 1 | ZHX3         | XLOC_222296 | 424 coding   | coding    | noncoding | noncoding |
| MSTRG. 214557. 1 |              | XLOC_222319 | 247 coding   | noncoding | noncoding | noncoding |
| XM_024451820. 1  | PTPRT        | XLOC_222326 | 7044 coding  | coding    | coding    | coding    |
| MSTRG. 214822. 1 | PTPRT        | XLOC_222333 | 288 coding   | noncoding | noncoding | noncoding |
| MSTRG. 214827. 1 | PTPRT        | XLOC_222335 | 294 coding   | noncoding | noncoding | noncoding |
| MSTRG. 214831. 1 | PTPRT        | XLOC_222336 | 275 coding   | noncoding | noncoding | noncoding |
| MSTRG. 214832. 1 | PTPRT        | XLOC_222337 | 263 coding   | noncoding | noncoding | noncoding |
| MSTRG. 214749. 1 |              | XLOC_222350 | 307 coding   | noncoding | noncoding | noncoding |
| MSTRG. 214924. 1 |              | XLOC_222399 | 286 coding   | noncoding | noncoding | noncoding |
| MSTRG. 214926. 1 |              | XLOC_222400 | 319 coding   | noncoding | noncoding | noncoding |
| MSTRG. 214929. 1 | GDAP1L1      | XLOC_222401 | 285 coding   | noncoding | noncoding | noncoding |
| MSTRG. 214965. 1 | HNFB4A       | XLOC_222404 | 298 coding   | noncoding | noncoding | noncoding |
| MSTRG. 214972. 6 | TTPAL        | XLOC_222412 | 1837 coding  | coding    | coding    | noncoding |
| MSTRG. 215011. 1 | ADA          | XLOC_222421 | 323 coding   | noncoding | noncoding | noncoding |
| MSTRG. 214986. 1 |              | XLOC_222425 | 316 coding   | noncoding | noncoding | noncoding |
| MSTRG. 215142. 1 | KCNS1        | XLOC_222454 | 23215 coding | coding    | coding    | coding    |
| MSTRG. 215062. 1 | LOC105372630 | XLOC_222470 | 267 coding   | noncoding | noncoding | noncoding |
| XM_005260597. 1  | MATN4        | XLOC_222471 | 2493 coding  | coding    | coding    | coding    |
| MSTRG. 215081. 1 | WFDC2        | XLOC_222494 | 289 coding   | coding    | noncoding | noncoding |
| MSTRG. 215090. 1 | WFDC9        | XLOC_222500 | 281 coding   | noncoding | noncoding | noncoding |
| MSTRG. 215112. 1 | WFDC11       | XLOC_222503 | 307 coding   | coding    | noncoding | noncoding |
| MSTRG. 215173. 1 | TNNC2        | XLOC_222508 | 250 coding   | noncoding | noncoding | noncoding |
| MSTRG. 215178. 1 | ACOT8        | XLOC_222512 | 206 coding   | noncoding | noncoding | noncoding |
| MSTRG. 215180. 5 | ZSWIM1       | XLOC_222513 | 1705 coding  | coding    | coding    | noncoding |
| MSTRG. 215196. 1 | CDH22        | XLOC_222530 | 312 coding   | noncoding | noncoding | noncoding |
| MSTRG. 215281. 1 | EYA2         | XLOC_222562 | 228 coding   | noncoding | noncoding | noncoding |
| MSTRG. 215313. 1 | ZMYND8       | XLOC_222571 | 218 coding   | noncoding | noncoding | noncoding |
| MSTRG. 215320. 1 | ZMYND8       | XLOC_222576 | 289 coding   | noncoding | noncoding | noncoding |

|                   |                |             |             |           |           |           |
|-------------------|----------------|-------------|-------------|-----------|-----------|-----------|
| MSTRG. 215304. 1  | LINC01754      | XLOC_222580 | 264 coding  | noncoding | noncoding | noncoding |
| MSTRG. 215309. 1  |                | XLOC_222583 | 241 coding  | noncoding | noncoding | noncoding |
| MSTRG. 215376. 11 | NCOA3          | XLOC_222585 | 716 coding  | coding    | noncoding | noncoding |
| MSTRG. 215329. 1  |                | XLOC_222589 | 412 coding  | noncoding | noncoding | noncoding |
| MSTRG. 215361. 1  | LINC00494      | XLOC_222606 | 288 coding  | noncoding | noncoding | noncoding |
| MSTRG. 215510. 1  | STAU1          | XLOC_222675 | 208 coding  | noncoding | noncoding | noncoding |
| MSTRG. 215515. 1  | STAU1          | XLOC_222680 | 259 coding  | noncoding | noncoding | noncoding |
| MSTRG. 215454. 1  | LOC105372649   | XLOC_222691 | 356 coding  | noncoding | noncoding | noncoding |
| MSTRG. 215467. 1  |                | XLOC_222700 | 331 coding  | noncoding | noncoding | noncoding |
| MSTRG. 215474. 1  |                | XLOC_222701 | 314 coding  | noncoding | noncoding | noncoding |
| MSTRG. 215541. 1  |                | XLOC_222735 | 278 coding  | noncoding | noncoding | noncoding |
| MSTRG. 215548. 1  | TRERNA1        | XLOC_222739 | 255 coding  | noncoding | noncoding | noncoding |
| NM_001282575. 3   | UBE2V1         | XLOC_222743 | 2591 coding | coding    | coding    | noncoding |
| MSTRG. 215570. 1  | TMEM189-UBE2V1 | XLOC_222745 | 242 coding  | noncoding | noncoding | noncoding |
| MSTRG. 215609. 1  |                | XLOC_222766 | 273 coding  | noncoding | noncoding | noncoding |
| MSTRG. 215613. 1  |                | XLOC_222773 | 270 coding  | noncoding | noncoding | noncoding |
| MSTRG. 215643. 1  |                | XLOC_222796 | 274 coding  | noncoding | noncoding | noncoding |
| MSTRG. 215720. 1  | ATP9A          | XLOC_222826 | 238 coding  | noncoding | noncoding | noncoding |
| NM_020436. 5      | SALL4          | XLOC_222827 | 5209 coding | coding    | coding    | coding    |
| MSTRG. 215700. 1  |                | XLOC_222830 | 361 coding  | noncoding | noncoding | noncoding |
| MSTRG. 215704. 1  |                | XLOC_222831 | 229 coding  | noncoding | noncoding | noncoding |
| MSTRG. 215710. 1  |                | XLOC_222835 | 242 coding  | noncoding | noncoding | noncoding |
| XM_011528900. 2   | ZFP64          | XLOC_222837 | 3123 coding | coding    | coding    | coding    |
| MSTRG. 215734. 1  | ZFP64          | XLOC_222841 | 379 coding  | noncoding | noncoding | noncoding |
| MSTRG. 215838. 1  | ZNF217         | XLOC_222883 | 249 coding  | noncoding | noncoding | noncoding |
| MSTRG. 215839. 1  | ZNF217         | XLOC_222884 | 254 coding  | noncoding | noncoding | noncoding |
| MSTRG. 215801. 1  |                | XLOC_222888 | 240 coding  | noncoding | noncoding | noncoding |
| MSTRG. 215805. 1  |                | XLOC_222890 | 302 coding  | noncoding | noncoding | noncoding |
| MSTRG. 215821. 1  |                | XLOC_222910 | 285 coding  | noncoding | noncoding | noncoding |
| MSTRG. 215824. 1  |                | XLOC_222913 | 295 coding  | noncoding | noncoding | noncoding |
| MSTRG. 215884. 1  | DOK5           | XLOC_222926 | 289 coding  | noncoding | noncoding | noncoding |
| MSTRG. 215885. 1  | DOK5           | XLOC_222927 | 264 coding  | noncoding | noncoding | noncoding |
| MSTRG. 215893. 1  |                | XLOC_222931 | 736 coding  | coding    | noncoding | noncoding |
| NR_110064. 1      | LINC01441      | XLOC_222941 | 2290 coding | noncoding | noncoding | noncoding |
| MSTRG. 215915. 1  |                | XLOC_222943 | 256 coding  | noncoding | noncoding | noncoding |
| MSTRG. 215917. 1  |                | XLOC_222945 | 243 coding  | noncoding | noncoding | noncoding |
| MSTRG. 215921. 1  | LOC105372676   | XLOC_222947 | 234 coding  | noncoding | noncoding | noncoding |
| MSTRG. 215922. 1  | LOC105372676   | XLOC_222948 | 230 coding  | noncoding | noncoding | noncoding |
| MSTRG. 215951. 1  |                | XLOC_222970 | 207 coding  | noncoding | noncoding | noncoding |
| MSTRG. 215953. 1  |                | XLOC_222976 | 245 coding  | noncoding | noncoding | noncoding |
| MSTRG. 215964. 1  |                | XLOC_222983 | 254 coding  | noncoding | noncoding | noncoding |
| MSTRG. 215982. 1  |                | XLOC_222986 | 270 coding  | noncoding | noncoding | noncoding |
| MSTRG. 215990. 1  |                | XLOC_222990 | 268 coding  | noncoding | noncoding | noncoding |

|                 |              |             |             |           |           |           |
|-----------------|--------------|-------------|-------------|-----------|-----------|-----------|
| NM_001719.3     | BMP7         | XLOC_222995 | 4021 coding | coding    | coding    | coding    |
| MSTRG.216107.1  | PPP4R1L      | XLOC_223035 | 252 coding  | noncoding | noncoding | noncoding |
| MSTRG.216092.4  | RAB22A       | XLOC_223042 | 385 coding  | coding    | noncoding | noncoding |
| MSTRG.216136.18 | STX16-NPEPL1 | XLOC_223060 | 2023 coding | coding    | coding    | noncoding |
| MSTRG.216231.1  |              | XLOC_223085 | 293 coding  | noncoding | noncoding | noncoding |
| MSTRG.216233.1  |              | XLOC_223086 | 239 coding  | noncoding | noncoding | noncoding |
| MSTRG.216370.1  |              | XLOC_223195 | 290 coding  | noncoding | noncoding | noncoding |
| NM_007232.3     | HRH3         | XLOC_223246 | 2692 coding | coding    | coding    | coding    |
| NR_033263.1     | MIR1-1HG-AS1 | XLOC_223262 | 3610 coding | noncoding | coding    | noncoding |
| NM_001193369.2  | DIDO1        | XLOC_223286 | 8479 coding | coding    | coding    | coding    |
| MSTRG.216550.1  |              | XLOC_223293 | 294 coding  | noncoding | noncoding | noncoding |
| MSTRG.216557.1  | LINC01056    | XLOC_223298 | 245 coding  | noncoding | noncoding | noncoding |
| NR_046317.1     | CHRNA4       | XLOC_223322 | 5568 coding | coding    | coding    | coding    |
| XM_011528810.2  | KCNQ2        | XLOC_223323 | 9267 coding | coding    | coding    | coding    |
| MSTRG.216714.1  | STMN3        | XLOC_223343 | 219 coding  | noncoding | noncoding | noncoding |
| MSTRG.216748.1  | RTEL1        | XLOC_223349 | 540 coding  | coding    | noncoding | noncoding |
| NM_001267549.3  | ARFRP1       | XLOC_223351 | 2589 coding | coding    | coding    | coding    |
| MSTRG.216729.1  | C20orf181    | XLOC_223355 | 249 coding  | noncoding | noncoding | noncoding |
| MSTRG.216776.61 | UCKL1        | XLOC_223363 | 540 coding  | noncoding | coding    | noncoding |
| MSTRG.216806.2  | PCMTD2       | XLOC_223381 | 3861 coding | coding    | coding    | noncoding |
| NR_146656.1     | LOC110091777 | XLOC_223413 | 5483 coding | noncoding | noncoding | noncoding |
| MSTRG.216962.1  |              | XLOC_223436 | 1684 coding | noncoding | noncoding | noncoding |
| XR_951149.2     | LOC105379506 | XLOC_223439 | 807 coding  | noncoding | noncoding | noncoding |
| XR_001754938.2  | LOC107987293 | XLOC_223440 | 2581 coding | noncoding | noncoding | noncoding |
| XR_951151.2     | LOC105379508 | XLOC_223444 | 727 coding  | noncoding | noncoding | noncoding |
| XR_951150.2     | LOC105379507 | XLOC_223446 | 807 coding  | noncoding | noncoding | noncoding |
| XR_001754939.2  | LOC107987294 | XLOC_223447 | 2405 coding | noncoding | noncoding | noncoding |
| MSTRG.216882.1  |              | XLOC_223448 | 299 coding  | noncoding | coding    | noncoding |
| MSTRG.216935.1  |              | XLOC_223480 | 379 coding  | noncoding | noncoding | noncoding |
| MSTRG.216954.1  | LOC105372733 | XLOC_223486 | 246 coding  | noncoding | noncoding | noncoding |
| MSTRG.216947.1  |              | XLOC_223487 | 288 coding  | noncoding | noncoding | noncoding |
| MSTRG.216991.1  | TPTE         | XLOC_223497 | 255 coding  | noncoding | noncoding | noncoding |
| MSTRG.216993.1  |              | XLOC_223499 | 251 coding  | noncoding | coding    | noncoding |
| MSTRG.217024.1  |              | XLOC_223514 | 290 coding  | noncoding | noncoding | noncoding |
| MSTRG.217028.1  |              | XLOC_223517 | 247 coding  | coding    | noncoding | noncoding |
| MSTRG.217032.1  |              | XLOC_223563 | 338 coding  | coding    | noncoding | noncoding |
| MSTRG.217045.1  | LOC105377134 | XLOC_223567 | 255 coding  | noncoding | coding    | noncoding |
| MSTRG.217107.1  | LIPI         | XLOC_223569 | 292 coding  | coding    | noncoding | noncoding |
| MSTRG.217121.2  | HSPA13       | XLOC_223572 | 2870 coding | coding    | noncoding | noncoding |
| MSTRG.217163.1  |              | XLOC_223597 | 244 coding  | noncoding | noncoding | noncoding |
| MSTRG.217166.1  |              | XLOC_223599 | 218 coding  | noncoding | noncoding | noncoding |
| MSTRG.217170.1  |              | XLOC_223605 | 277 coding  | noncoding | noncoding | noncoding |
| MSTRG.217272.1  | MIR99AHG     | XLOC_223674 | 312 coding  | noncoding | noncoding | noncoding |

|                  |              |             |              |           |           |           |
|------------------|--------------|-------------|--------------|-----------|-----------|-----------|
| MSTRG. 217251. 1 |              | XLOC_223689 | 257 coding   | noncoding | noncoding | noncoding |
| MSTRG. 217263. 1 |              | XLOC_223696 | 281 coding   | noncoding | noncoding | noncoding |
| MSTRG. 217413. 1 |              | XLOC_223720 | 246 coding   | noncoding | noncoding | noncoding |
| MSTRG. 217439. 1 |              | XLOC_223735 | 264 coding   | noncoding | noncoding | noncoding |
| XM_011529576. 3  | NCAM2        | XLOC_223756 | 8223 coding  | coding    | coding    | coding    |
| XM_011529580. 3  | NCAM2        | XLOC_223756 | 8827 coding  | coding    | coding    | coding    |
| MSTRG. 217599. 1 | NCAM2        | XLOC_223757 | 243 coding   | noncoding | noncoding | noncoding |
| MSTRG. 217486. 1 |              | XLOC_223768 | 324 coding   | noncoding | noncoding | noncoding |
| MSTRG. 217501. 1 |              | XLOC_223778 | 299 coding   | noncoding | noncoding | noncoding |
| MSTRG. 217591. 1 | LINC01687    | XLOC_223785 | 282 coding   | noncoding | noncoding | noncoding |
| MSTRG. 217626. 1 |              | XLOC_223789 | 238 coding   | noncoding | noncoding | noncoding |
| MSTRG. 217643. 1 |              | XLOC_223803 | 399 coding   | noncoding | noncoding | noncoding |
| MSTRG. 217653. 1 |              | XLOC_223809 | 310 coding   | noncoding | noncoding | noncoding |
| MSTRG. 217684. 1 |              | XLOC_223824 | 493 coding   | noncoding | noncoding | noncoding |
| MSTRG. 217691. 1 |              | XLOC_223834 | 263 coding   | noncoding | noncoding | noncoding |
| MSTRG. 217692. 1 |              | XLOC_223835 | 224 coding   | noncoding | noncoding | noncoding |
| NR_046198. 3     | LINC01692    | XLOC_223836 | 2719 coding  | noncoding | noncoding | noncoding |
| MSTRG. 217815. 1 |              | XLOC_223894 | 227 coding   | noncoding | noncoding | noncoding |
| MSTRG. 217831. 1 |              | XLOC_223896 | 280 coding   | noncoding | noncoding | noncoding |
| MSTRG. 217850. 1 | LOC105372760 | XLOC_223901 | 237 coding   | noncoding | noncoding | noncoding |
| MSTRG. 217875. 1 | LOC112268279 | XLOC_223910 | 259 coding   | noncoding | noncoding | noncoding |
| MSTRG. 217889. 1 |              | XLOC_223922 | 271 coding   | noncoding | noncoding | noncoding |
| XR_001754992. 1  | LINC01673    | XLOC_223926 | 9810 coding  | noncoding | coding    | noncoding |
| MSTRG. 217917. 1 |              | XLOC_223939 | 228 coding   | noncoding | noncoding | noncoding |
| MSTRG. 217920. 1 |              | XLOC_223941 | 318 coding   | noncoding | noncoding | noncoding |
| MSTRG. 217938. 4 | LTN1         | XLOC_224111 | 885 coding   | noncoding | noncoding | noncoding |
| MSTRG. 217966. 1 | MAP3K7CL     | XLOC_224127 | 254 coding   | noncoding | noncoding | noncoding |
| NR_027655. 2     | BACH1        | XLOC_224138 | 2778 coding  | coding    | coding    | coding    |
| XR_001754996. 1  | LOC105372768 | XLOC_224192 | 3095 coding  | noncoding | noncoding | noncoding |
| MSTRG. 217993. 1 | LOC105372772 | XLOC_224216 | 262 coding   | noncoding | noncoding | noncoding |
| MSTRG. 218000. 1 | LOC105372772 | XLOC_224221 | 251 coding   | noncoding | noncoding | noncoding |
| MSTRG. 218018. 1 |              | XLOC_224236 | 282 coding   | noncoding | noncoding | noncoding |
| MSTRG. 218078. 1 | TIAM1        | XLOC_224248 | 264 coding   | noncoding | noncoding | noncoding |
| MSTRG. 218047. 1 | HUNK         | XLOC_224261 | 297 coding   | noncoding | noncoding | noncoding |
| MSTRG. 218086. 1 | MIS18A       | XLOC_224272 | 296 coding   | noncoding | noncoding | noncoding |
| MSTRG. 218093. 1 | MIS18A       | XLOC_224277 | 306 coding   | noncoding | noncoding | noncoding |
| XR_001754885. 1  | EVA1C        | XLOC_224298 | 1463 coding  | coding    | coding    | coding    |
| MSTRG. 218143. 1 |              | XLOC_224344 | 340 coding   | noncoding | noncoding | noncoding |
| MSTRG. 218497. 1 |              | XLOC_224412 | 209 coding   | noncoding | noncoding | noncoding |
| MSTRG. 218543. 1 |              | XLOC_224440 | 724 coding   | noncoding | noncoding | noncoding |
| MSTRG. 218544. 1 |              | XLOC_224441 | 235 coding   | noncoding | noncoding | noncoding |
| XM_017028429. 2  | ITSN1        | XLOC_224459 | 16910 coding | coding    | coding    | coding    |
| NM_001001132. 2  | ITSN1        | XLOC_224459 | 5418 coding  | coding    | coding    | coding    |

|                  |              |             |              |           |           |           |
|------------------|--------------|-------------|--------------|-----------|-----------|-----------|
| MSTRG. 218706. 1 | ITSN1        | XLOC_224465 | 270 coding   | noncoding | noncoding | noncoding |
| MSTRG. 218779. 1 |              | XLOC_224500 | 287 coding   | noncoding | noncoding | noncoding |
| MSTRG. 218782. 1 |              | XLOC_224501 | 305 coding   | noncoding | noncoding | noncoding |
| MSTRG. 218817. 1 |              | XLOC_224518 | 310 coding   | noncoding | noncoding | noncoding |
| NM_001317009. 2  | CLIC6        | XLOC_224519 | 4251 coding  | coding    | coding    | coding    |
| MSTRG. 218952. 6 | RUNX1        | XLOC_224522 | 4509 coding  | noncoding | coding    | coding    |
| MSTRG. 218866. 1 | LOC100506403 | XLOC_224538 | 405 coding   | noncoding | noncoding | noncoding |
| MSTRG. 218870. 1 |              | XLOC_224545 | 230 coding   | noncoding | noncoding | noncoding |
| MSTRG. 218912. 1 |              | XLOC_224573 | 299 coding   | noncoding | noncoding | noncoding |
| MSTRG. 218943. 1 | MORC3        | XLOC_224575 | 223 coding   | noncoding | noncoding | noncoding |
| XM_017028478. 1  | CHAF1B       | XLOC_224580 | 3548 coding  | coding    | coding    | coding    |
| MSTRG. 218923. 1 | CHAF1B       | XLOC_224581 | 338 coding   | noncoding | noncoding | noncoding |
| XR_001755025. 1  | LOC105369301 | XLOC_224582 | 2559 coding  | noncoding | noncoding | noncoding |
| MSTRG. 218930. 1 | LOC105369301 | XLOC_224583 | 277 coding   | noncoding | noncoding | noncoding |
| MSTRG. 218926. 1 |              | XLOC_224589 | 302 coding   | noncoding | noncoding | noncoding |
| MSTRG. 218938. 1 | LOC105369308 | XLOC_224590 | 309 coding   | noncoding | noncoding | noncoding |
| XR_001754907. 1  | TTC3         | XLOC_224608 | 4976 coding  | noncoding | coding    | coding    |
| MSTRG. 219044. 1 |              | XLOC_224625 | 268 coding   | noncoding | noncoding | noncoding |
| MSTRG. 219053. 1 |              | XLOC_224667 | 258 coding   | noncoding | noncoding | noncoding |
| MSTRG. 219063. 1 |              | XLOC_224671 | 242 coding   | noncoding | noncoding | noncoding |
| MSTRG. 219231. 5 | KCNJ15       | XLOC_224677 | 4609 coding  | coding    | coding    | coding    |
| XM_006724002. 2  | KCNJ15       | XLOC_224677 | 5930 coding  | coding    | coding    | coding    |
| MSTRG. 219164. 1 |              | XLOC_224696 | 438 coding   | noncoding | noncoding | noncoding |
| MSTRG. 219221. 1 | LOC107985484 | XLOC_224712 | 244 coding   | noncoding | noncoding | noncoding |
| MSTRG. 219236. 1 |              | XLOC_224731 | 312 coding   | noncoding | noncoding | noncoding |
| NM_033171. 3     | B3GALT5      | XLOC_224737 | 13114 coding | coding    | coding    | coding    |
| MSTRG. 219302. 1 | DSCAM        | XLOC_224747 | 471 coding   | noncoding | noncoding | noncoding |
| MSTRG. 219305. 1 | DSCAM        | XLOC_224749 | 280 coding   | noncoding | noncoding | noncoding |
| MSTRG. 219307. 1 | DSCAM        | XLOC_224750 | 283 coding   | noncoding | noncoding | noncoding |
| MSTRG. 219312. 1 | DSCAM        | XLOC_224753 | 332 coding   | noncoding | noncoding | noncoding |
| MSTRG. 219323. 1 | DSCAM        | XLOC_224761 | 264 coding   | noncoding | noncoding | noncoding |
| MSTRG. 219285. 1 |              | XLOC_224769 | 282 coding   | noncoding | noncoding | noncoding |
| MSTRG. 219395. 1 | FAM3B        | XLOC_224781 | 228 coding   | noncoding | noncoding | noncoding |
| NM_002463. 2     | MX2          | XLOC_224786 | 3408 coding  | coding    | coding    | coding    |
| MSTRG. 219407. 1 |              | XLOC_224789 | 288 coding   | noncoding | noncoding | noncoding |
| MSTRG. 219414. 1 |              | XLOC_224797 | 317 coding   | noncoding | noncoding | noncoding |
| MSTRG. 219423. 1 | RIPK4        | XLOC_224806 | 315 coding   | noncoding | noncoding | noncoding |
| MSTRG. 219548. 1 | PDE9A        | XLOC_224869 | 265 coding   | noncoding | noncoding | noncoding |
| MSTRG. 219534. 1 | LOC107985479 | XLOC_224873 | 320 coding   | noncoding | noncoding | noncoding |
| MSTRG. 219602. 1 | PKNOX1       | XLOC_224895 | 324 coding   | noncoding | noncoding | noncoding |
| MSTRG. 219608. 1 | LOC107987300 | XLOC_224903 | 324 coding   | noncoding | noncoding | noncoding |
| MSTRG. 219635. 1 |              | XLOC_224919 | 253 coding   | noncoding | noncoding | noncoding |
| XM_011529758. 3  | PDXK         | XLOC_224920 | 7706 coding  | coding    | coding    | coding    |

|                   |              |             |              |           |           |           |
|-------------------|--------------|-------------|--------------|-----------|-----------|-----------|
| MSTRG. 219659. 1  |              | XLOC_224927 | 226 coding   | noncoding | noncoding | noncoding |
| MSTRG. 219656. 1  |              | XLOC_224928 | 228 coding   | noncoding | noncoding | noncoding |
| NM_001369880. 1   | AGPAT3       | XLOC_224937 | 6569 coding  | coding    | coding    | coding    |
| XM_011529664. 2   | AGPAT3       | XLOC_224937 | 5955 coding  | coding    | coding    | coding    |
| XM_011529714. 2   | TRAPPC10     | XLOC_224948 | 6423 coding  | coding    | coding    | coding    |
| MSTRG. 219701. 1  | DNMT3L       | XLOC_224962 | 313 coding   | coding    | noncoding | noncoding |
| MSTRG. 219746. 1  | TRPM2        | XLOC_224978 | 231 coding   | noncoding | noncoding | noncoding |
| MSTRG. 219748. 1  | TRPM2        | XLOC_224979 | 279 coding   | noncoding | noncoding | noncoding |
| NM_198692. 3      | KRTAP10-11   | XLOC_225002 | 1237 coding  | coding    | coding    | coding    |
| MSTRG. 219802. 1  | TSPEAR       | XLOC_225006 | 290 coding   | noncoding | noncoding | noncoding |
| MSTRG. 219891. 2  | COL18A1      | XLOC_225057 | 6977 coding  | coding    | coding    | coding    |
| MSTRG. 219881. 1  |              | XLOC_225066 | 228 coding   | noncoding | noncoding | noncoding |
| MSTRG. 219980. 1  | PCBP3        | XLOC_225073 | 587 coding   | noncoding | noncoding | noncoding |
| MSTRG. 219998. 1  | PCBP3        | XLOC_225076 | 287 coding   | noncoding | noncoding | noncoding |
| MSTRG. 220003. 1  | PCBP3        | XLOC_225077 | 280 coding   | noncoding | noncoding | noncoding |
| MSTRG. 220009. 1  | PCBP3        | XLOC_225079 | 293 coding   | noncoding | noncoding | noncoding |
| MSTRG. 220222. 1  | DIP2A        | XLOC_225119 | 217 coding   | noncoding | noncoding | noncoding |
| MSTRG. 216815. 1  | LOC102723996 | XLOC_225142 | 284 coding   | noncoding | noncoding | noncoding |
| MSTRG. 216830. 1  |              | XLOC_225149 | 312 coding   | coding    | noncoding | noncoding |
| NM_001354014. 1   | CBSL         | XLOC_225160 | 2647 coding  | coding    | coding    | coding    |
| XR_951133. 2      | LOC105379497 | XLOC_225164 | 3031 coding  | noncoding | coding    | noncoding |
| MSTRG. 216965. 9  | LOC107987293 | XLOC_225181 | 1125 coding  | noncoding | coding    | noncoding |
| MSTRG. 216965. 21 | LOC105379508 | XLOC_225181 | 1979 coding  | noncoding | noncoding | noncoding |
| MSTRG. 216965. 44 | LOC112268284 | XLOC_225181 | 3254 coding  | noncoding | coding    | noncoding |
| MSTRG. 216965. 42 | LOC112268284 | XLOC_225181 | 3970 coding  | noncoding | coding    | noncoding |
| XR_430342. 4      | CDC27P9      | XLOC_225182 | 2343 coding  | coding    | coding    | coding    |
| XR_430343. 4      | CDC27P10     | XLOC_225184 | 2296 coding  | coding    | coding    | coding    |
| MSTRG. 216977. 1  | LOC107987294 | XLOC_225186 | 10103 coding | noncoding | coding    | coding    |
| XR_430344. 3      | CDC27P11     | XLOC_225187 | 3824 coding  | coding    | coding    | coding    |
| MSTRG. 216939. 1  |              | XLOC_225214 | 324 coding   | noncoding | noncoding | noncoding |
| MSTRG. 216944. 1  |              | XLOC_225216 | 272 coding   | noncoding | noncoding | noncoding |
| MSTRG. 216955. 1  | LOC105372733 | XLOC_225222 | 246 coding   | noncoding | noncoding | noncoding |
| MSTRG. 216946. 1  |              | XLOC_225223 | 288 coding   | noncoding | noncoding | noncoding |
| MSTRG. 216960. 1  | BAGE2        | XLOC_225227 | 314 coding   | noncoding | noncoding | noncoding |
| MSTRG. 217012. 1  |              | XLOC_225241 | 238 coding   | noncoding | noncoding | noncoding |
| MSTRG. 217013. 1  |              | XLOC_225242 | 323 coding   | noncoding | noncoding | noncoding |
| MSTRG. 217016. 1  | ANKRD30BP2   | XLOC_225243 | 307 coding   | noncoding | noncoding | noncoding |
| MSTRG. 217014. 1  |              | XLOC_225244 | 248 coding   | noncoding | noncoding | noncoding |
| MSTRG. 217022. 1  |              | XLOC_225248 | 827 coding   | coding    | noncoding | noncoding |
| MSTRG. 217025. 1  |              | XLOC_225250 | 375 coding   | noncoding | noncoding | noncoding |
| MSTRG. 217029. 1  |              | XLOC_225251 | 247 coding   | coding    | noncoding | noncoding |
| MSTRG. 217033. 1  |              | XLOC_225260 | 227 coding   | noncoding | noncoding | noncoding |
| MSTRG. 217106. 1  | LIPI         | XLOC_225281 | 292 coding   | coding    | noncoding | noncoding |

|                   |              |             |             |           |           |           |
|-------------------|--------------|-------------|-------------|-----------|-----------|-----------|
| MSTRG. 217123. 1  |              | XLOC_225314 | 301 coding  | noncoding | noncoding | noncoding |
| NR_146322. 1      | LINC02246    | XLOC_225318 | 8345 coding | noncoding | noncoding | noncoding |
| MSTRG. 217164. 1  |              | XLOC_225339 | 311 coding  | noncoding | noncoding | noncoding |
| MSTRG. 217167. 1  |              | XLOC_225340 | 218 coding  | noncoding | noncoding | noncoding |
| MSTRG. 217183. 1  |              | XLOC_225356 | 213 coding  | noncoding | noncoding | noncoding |
| MSTRG. 217270. 1  | MIR99AHG     | XLOC_225376 | 226 coding  | noncoding | noncoding | noncoding |
| MSTRG. 217280. 1  | MIR99AHG     | XLOC_225384 | 330 coding  | noncoding | noncoding | noncoding |
| MSTRG. 217291. 1  | MIR99AHG     | XLOC_225390 | 255 coding  | noncoding | noncoding | noncoding |
| MSTRG. 217240. 1  |              | XLOC_225396 | 254 coding  | noncoding | noncoding | noncoding |
| MSTRG. 217241. 1  |              | XLOC_225397 | 227 coding  | noncoding | noncoding | noncoding |
| MSTRG. 217245. 1  |              | XLOC_225399 | 287 coding  | noncoding | coding    | noncoding |
| MSTRG. 217250. 1  |              | XLOC_225402 | 291 coding  | noncoding | noncoding | noncoding |
| MSTRG. 217254. 1  |              | XLOC_225404 | 245 coding  | noncoding | noncoding | noncoding |
| MSTRG. 217255. 1  |              | XLOC_225405 | 278 coding  | noncoding | noncoding | noncoding |
| MSTRG. 217307. 1  |              | XLOC_225413 | 215 coding  | noncoding | noncoding | noncoding |
| MSTRG. 217429. 1  | LOC105372745 | XLOC_225522 | 357 coding  | noncoding | noncoding | noncoding |
| MSTRG. 217434. 1  |              | XLOC_225523 | 346 coding  | coding    | noncoding | noncoding |
| MSTRG. 217440. 1  |              | XLOC_225526 | 264 coding  | noncoding | noncoding | noncoding |
| MSTRG. 217443. 1  |              | XLOC_225529 | 238 coding  | noncoding | noncoding | noncoding |
| MSTRG. 217464. 1  |              | XLOC_225539 | 279 coding  | noncoding | noncoding | noncoding |
| MSTRG. 217502. 1  |              | XLOC_225573 | 298 coding  | noncoding | noncoding | noncoding |
| MSTRG. 217586. 1  |              | XLOC_225585 | 447 coding  | noncoding | noncoding | noncoding |
| MSTRG. 217624. 1  |              | XLOC_225587 | 223 coding  | coding    | noncoding | noncoding |
| MSTRG. 217654. 1  |              | XLOC_225602 | 310 coding  | noncoding | noncoding | noncoding |
| MSTRG. 217668. 1  |              | XLOC_225609 | 296 coding  | noncoding | noncoding | noncoding |
| MSTRG. 217673. 1  |              | XLOC_225612 | 286 coding  | noncoding | noncoding | noncoding |
| MSTRG. 217687. 1  |              | XLOC_225616 | 272 coding  | coding    | noncoding | noncoding |
| MSTRG. 217690. 1  |              | XLOC_225632 | 263 coding  | noncoding | noncoding | noncoding |
| NM_001003701. 1   | ATP5PF       | XLOC_225673 | 1210 coding | coding    | coding    | coding    |
| MSTRG. 217792. 4  | ATP5PF       | XLOC_225673 | 1921 coding | coding    | coding    | noncoding |
| MSTRG. 217788. 1  |              | XLOC_225675 | 336 coding  | noncoding | noncoding | noncoding |
| MSTRG. 217839. 1  | APP          | XLOC_225683 | 248 coding  | noncoding | noncoding | noncoding |
| MSTRG. 217796. 1  |              | XLOC_225690 | 300 coding  | noncoding | noncoding | noncoding |
| MSTRG. 217801. 1  |              | XLOC_225691 | 220 coding  | noncoding | noncoding | noncoding |
| MSTRG. 217819. 1  | CYYR1-AS1    | XLOC_225695 | 286 coding  | noncoding | noncoding | noncoding |
| MSTRG. 217827. 1  | CYYR1-AS1    | XLOC_225700 | 295 coding  | noncoding | noncoding | noncoding |
| MSTRG. 217814. 1  |              | XLOC_225706 | 227 coding  | noncoding | noncoding | noncoding |
| MSTRG. 217846. 1  | LOC105372760 | XLOC_225708 | 256 coding  | noncoding | coding    | noncoding |
| MSTRG. 218219. 1  | LINC01697    | XLOC_225744 | 310 coding  | noncoding | noncoding | noncoding |
| MSTRG. 217941. 1  | LTN1         | XLOC_225797 | 602 coding  | noncoding | noncoding | noncoding |
| MSTRG. 218562. 4  | BACH1        | XLOC_225815 | 5688 coding | coding    | noncoding | coding    |
| MSTRG. 218562. 10 | BACH1        | XLOC_225815 | 6056 coding | coding    | noncoding | noncoding |
| MSTRG. 217986. 1  |              | XLOC_225835 | 365 coding  | noncoding | noncoding | noncoding |

|                   |              |             |              |           |           |           |
|-------------------|--------------|-------------|--------------|-----------|-----------|-----------|
| MSTRG. 217999. 1  | LOC105372772 | XLOC_225846 | 251 coding   | noncoding | noncoding | noncoding |
| MSTRG. 217990. 1  |              | XLOC_225853 | 293 coding   | noncoding | noncoding | noncoding |
| MSTRG. 218004. 1  |              | XLOC_225863 | 616 coding   | noncoding | noncoding | noncoding |
| NM_181606. 3      | KRTAP7-1     | XLOC_225866 | 721 coding   | coding    | noncoding | noncoding |
| MSTRG. 218069. 1  | TIAM1        | XLOC_225886 | 388 coding   | noncoding | noncoding | noncoding |
| MSTRG. 218070. 1  | TIAM1        | XLOC_225887 | 305 coding   | noncoding | noncoding | noncoding |
| MSTRG. 218024. 1  |              | XLOC_225895 | 285 coding   | noncoding | noncoding | noncoding |
| MSTRG. 218030. 1  |              | XLOC_225901 | 250 coding   | noncoding | noncoding | noncoding |
| MSTRG. 218032. 1  |              | XLOC_225903 | 415 coding   | noncoding | noncoding | noncoding |
| XR_002958619. 1   | MIS18A       | XLOC_225912 | 4697 coding  | coding    | coding    | coding    |
| MSTRG. 218092. 1  | MIS18A       | XLOC_225914 | 331 coding   | noncoding | noncoding | noncoding |
| MSTRG. 218500. 1  | SYNJ1        | XLOC_225962 | 268 coding   | noncoding | noncoding | noncoding |
| MSTRG. 218510. 1  | SYNJ1        | XLOC_225972 | 223 coding   | noncoding | noncoding | noncoding |
| MSTRG. 218686. 1  | CRYZL1       | XLOC_226024 | 303 coding   | noncoding | noncoding | noncoding |
| MSTRG. 218818. 1  |              | XLOC_226106 | 283 coding   | noncoding | noncoding | noncoding |
| MSTRG. 218873. 1  |              | XLOC_226200 | 230 coding   | noncoding | noncoding | noncoding |
| MSTRG. 218877. 1  |              | XLOC_226202 | 316 coding   | noncoding | noncoding | noncoding |
| MSTRG. 218914. 1  |              | XLOC_226215 | 220 coding   | noncoding | noncoding | noncoding |
| MSTRG. 218941. 5  | MORC3        | XLOC_226216 | 3742 coding  | coding    | noncoding | noncoding |
| MSTRG. 218941. 4  | MORC3        | XLOC_226216 | 3799 coding  | coding    | noncoding | noncoding |
| MSTRG. 218949. 1  |              | XLOC_226241 | 309 coding   | noncoding | noncoding | noncoding |
| MSTRG. 219094. 10 | TTC3         | XLOC_226244 | 2221 coding  | noncoding | noncoding | noncoding |
| MSTRG. 219094. 13 | TTC3         | XLOC_226244 | 832 coding   | noncoding | noncoding | noncoding |
| MSTRG. 219136. 8  | DYRK1A       | XLOC_226266 | 2856 coding  | noncoding | coding    | noncoding |
| MSTRG. 219054. 1  |              | XLOC_226283 | 258 coding   | noncoding | noncoding | noncoding |
| MSTRG. 219229. 17 | LOC105372801 | XLOC_226289 | 29945 coding | noncoding | coding    | coding    |
| MSTRG. 219229. 16 | LOC105372801 | XLOC_226289 | 32141 coding | coding    | coding    | coding    |
| MSTRG. 219229. 24 | LOC105372801 | XLOC_226289 | 34229 coding | coding    | noncoding | coding    |
| MSTRG. 219229. 28 | KCNJ15       | XLOC_226289 | 10697 coding | coding    | noncoding | noncoding |
| MSTRG. 219165. 1  |              | XLOC_226302 | 438 coding   | noncoding | noncoding | noncoding |
| MSTRG. 219223. 1  | LOC107985484 | XLOC_226318 | 230 coding   | noncoding | noncoding | noncoding |
| MSTRG. 219353. 1  | BRWD1        | XLOC_226338 | 250 coding   | noncoding | noncoding | noncoding |
| MSTRG. 219354. 1  | BRWD1        | XLOC_226339 | 256 coding   | noncoding | noncoding | noncoding |
| XM_024452070. 1   | HMGNI        | XLOC_226342 | 1366 coding  | coding    | coding    | coding    |
| MSTRG. 219243. 1  |              | XLOC_226363 | 300 coding   | noncoding | noncoding | noncoding |
| NR_026543. 1      | B3GALT5-AS1  | XLOC_226364 | 1358 coding  | noncoding | noncoding | noncoding |
| NM_001389. 5      | DSCAM        | XLOC_226373 | 8571 coding  | coding    | coding    | coding    |
| MSTRG. 219306. 1  | DSCAM        | XLOC_226376 | 280 coding   | noncoding | noncoding | noncoding |
| MSTRG. 219324. 1  | DSCAM        | XLOC_226382 | 264 coding   | noncoding | noncoding | noncoding |
| MSTRG. 219294. 1  |              | XLOC_226390 | 298 coding   | noncoding | noncoding | noncoding |
| MSTRG. 219296. 1  |              | XLOC_226393 | 263 coding   | noncoding | noncoding | noncoding |
| MSTRG. 219406. 1  |              | XLOC_226423 | 576 coding   | noncoding | noncoding | noncoding |
| MSTRG. 219391. 1  |              | XLOC_226431 | 252 coding   | noncoding | noncoding | noncoding |

|                   |              |             |             |           |           |           |
|-------------------|--------------|-------------|-------------|-----------|-----------|-----------|
| MSTRG. 219410. 1  | LOC105372809 | XLOC_226434 | 229 coding  | noncoding | noncoding | noncoding |
| MSTRG. 219412. 1  | LOC105372809 | XLOC_226435 | 243 coding  | coding    | noncoding | noncoding |
| MSTRG. 219415. 1  |              | XLOC_226437 | 317 coding  | noncoding | noncoding | noncoding |
| NM_020639. 3      | RIPK4        | XLOC_226441 | 3831 coding | coding    | coding    | coding    |
| MSTRG. 219438. 1  |              | XLOC_226452 | 497 coding  | noncoding | noncoding | noncoding |
| MSTRG. 219501. 1  | RSPH1        | XLOC_226475 | 308 coding  | noncoding | noncoding | noncoding |
| MSTRG. 219559. 1  | PDE9A        | XLOC_226498 | 320 coding  | noncoding | noncoding | noncoding |
| MSTRG. 219586. 1  |              | XLOC_226521 | 210 coding  | noncoding | noncoding | noncoding |
| MSTRG. 219601. 1  | PKNOX1       | XLOC_226527 | 223 coding  | noncoding | noncoding | noncoding |
| MSTRG. 219636. 1  |              | XLOC_226556 | 253 coding  | noncoding | noncoding | noncoding |
| MSTRG. 219704. 5  | TRAPPC10     | XLOC_226569 | 4168 coding | coding    | noncoding | noncoding |
| MSTRG. 219690. 2  | GATD3A       | XLOC_226574 | 1438 coding | noncoding | coding    | noncoding |
| MSTRG. 219747. 1  | TRPM2        | XLOC_226594 | 279 coding  | noncoding | noncoding | noncoding |
| MSTRG. 219801. 1  | TSPEAR       | XLOC_226627 | 290 coding  | noncoding | noncoding | noncoding |
| MSTRG. 219913. 1  | LOC105372836 | XLOC_226656 | 306 coding  | noncoding | noncoding | noncoding |
| MSTRG. 219882. 1  |              | XLOC_226702 | 228 coding  | noncoding | noncoding | noncoding |
| MSTRG. 220020. 1  | PCBP3        | XLOC_226744 | 441 coding  | noncoding | noncoding | noncoding |
| MSTRG. 219938. 1  |              | XLOC_226748 | 238 coding  | noncoding | noncoding | noncoding |
| MSTRG. 220064. 1  |              | XLOC_226790 | 661 coding  | noncoding | noncoding | noncoding |
| MSTRG. 220055. 1  | FRG1FP       | XLOC_226806 | 324 coding  | noncoding | noncoding | noncoding |
| MSTRG. 220070. 1  |              | XLOC_226811 | 239 coding  | noncoding | noncoding | noncoding |
| MSTRG. 220075. 1  |              | XLOC_226813 | 368 coding  | noncoding | noncoding | noncoding |
| MSTRG. 220089. 1  | LOC107984037 | XLOC_226817 | 298 coding  | noncoding | noncoding | noncoding |
| MSTRG. 220091. 1  |              | XLOC_226818 | 217 coding  | noncoding | noncoding | noncoding |
| MSTRG. 220122. 1  |              | XLOC_226836 | 285 coding  | noncoding | noncoding | noncoding |
| MSTRG. 220139. 1  |              | XLOC_226847 | 321 coding  | noncoding | noncoding | noncoding |
| MSTRG. 220155. 1  |              | XLOC_226861 | 324 coding  | noncoding | noncoding | noncoding |
| MSTRG. 220267. 1  | IL17RA       | XLOC_226872 | 730 coding  | noncoding | noncoding | noncoding |
| MSTRG. 220251. 1  |              | XLOC_226885 | 231 coding  | noncoding | noncoding | noncoding |
| MSTRG. 220254. 1  | CECR2        | XLOC_226888 | 268 coding  | noncoding | noncoding | noncoding |
| MSTRG. 220256. 1  | CECR2        | XLOC_226890 | 267 coding  | noncoding | noncoding | noncoding |
| MSTRG. 220326. 1  | MICAL3       | XLOC_226903 | 303 coding  | noncoding | noncoding | noncoding |
| MSTRG. 220300. 1  | LOC105372942 | XLOC_226938 | 303 coding  | noncoding | noncoding | noncoding |
| MSTRG. 220362. 1  | PRODH        | XLOC_226952 | 290 coding  | noncoding | noncoding | noncoding |
| MSTRG. 220372. 1  | GSC2         | XLOC_226965 | 270 coding  | noncoding | noncoding | noncoding |
| MSTRG. 220442. 1  | CLTCL1       | XLOC_226969 | 273 coding  | noncoding | noncoding | noncoding |
| MSTRG. 220453. 12 | C22orf39     | XLOC_226977 | 2433 coding | noncoding | coding    | noncoding |
| MSTRG. 220405. 1  |              | XLOC_226984 | 237 coding  | noncoding | noncoding | noncoding |
| MSTRG. 220486. 1  | COMT         | XLOC_227006 | 245 coding  | noncoding | noncoding | noncoding |
| MSTRG. 220554. 1  | TANGO2       | XLOC_227014 | 224 coding  | noncoding | noncoding | noncoding |
| MSTRG. 220524. 1  |              | XLOC_227032 | 206 coding  | noncoding | noncoding | noncoding |
| MSTRG. 220538. 1  | USP41        | XLOC_227036 | 235 coding  | noncoding | noncoding | noncoding |
| MSTRG. 220639. 1  | AIFM3        | XLOC_227062 | 559 coding  | noncoding | noncoding | noncoding |

|                 |              |             |              |           |           |           |
|-----------------|--------------|-------------|--------------|-----------|-----------|-----------|
| XM_011530498.2  | P2RX6        | XLOC_227064 | 3632 coding  | coding    | coding    | coding    |
| MSTRG.220596.1  |              | XLOC_227068 | 295 coding   | noncoding | noncoding | noncoding |
| NR_024583.1     | POM121L8P    | XLOC_227073 | 7716 coding  | coding    | coding    | coding    |
| MSTRG.220653.1  | UBE2L3       | XLOC_227081 | 300 coding   | noncoding | noncoding | noncoding |
| MSTRG.220669.1  |              | XLOC_227094 | 323 coding   | noncoding | noncoding | noncoding |
| MSTRG.220661.1  |              | XLOC_227099 | 250 coding   | noncoding | noncoding | noncoding |
| IGLV1-62        | IGLV1-62     | XLOC_227107 | 309 coding   | noncoding | noncoding | noncoding |
| IGLC2           | IGLC2        | XLOC_227107 | 320 coding   | coding    | coding    | noncoding |
| MSTRG.220913.1  | IGLVI-70     | XLOC_227113 | 322 coding   | noncoding | noncoding | noncoding |
| MSTRG.220916.1  | IGLVI-70     | XLOC_227114 | 497 coding   | noncoding | noncoding | noncoding |
| XM_017028786.2  | GNAZ         | XLOC_227155 | 17279 coding | coding    | coding    | coding    |
| XR_937843.3     | GNAZ         | XLOC_227155 | 3663 coding  | coding    | coding    | coding    |
| XR_001755386.1  | RAB36        | XLOC_227160 | 5072 coding  | coding    | coding    | coding    |
| XM_011530545.2  | RAB36        | XLOC_227160 | 1454 coding  | coding    | coding    | coding    |
| MSTRG.220749.12 | GUSBP11      | XLOC_227180 | 959 coding   | noncoding | coding    | noncoding |
| MSTRG.220751.1  | GUSBP11      | XLOC_227181 | 1439 coding  | noncoding | noncoding | noncoding |
| MSTRG.220752.1  | GUSBP11      | XLOC_227182 | 247 coding   | noncoding | noncoding | noncoding |
| MSTRG.220714.1  |              | XLOC_227183 | 313 coding   | noncoding | noncoding | noncoding |
| MSTRG.220763.1  | GSTT2        | XLOC_227202 | 285 coding   | noncoding | noncoding | noncoding |
| XM_017028682.2  | CABIN1       | XLOC_227204 | 7196 coding  | coding    | coding    | coding    |
| MSTRG.220786.1  | CABIN1       | XLOC_227205 | 405 coding   | noncoding | noncoding | noncoding |
| MSTRG.220775.1  |              | XLOC_227212 | 256 coding   | noncoding | noncoding | noncoding |
| MSTRG.220783.1  | GGT5         | XLOC_227214 | 317 coding   | noncoding | noncoding | noncoding |
| MSTRG.220816.1  | PIWIL3       | XLOC_227236 | 214 coding   | noncoding | noncoding | noncoding |
| MSTRG.220825.1  | SGSM1        | XLOC_227239 | 220 coding   | noncoding | noncoding | noncoding |
| MSTRG.220820.1  | TMEM211      | XLOC_227242 | 282 coding   | noncoding | noncoding | noncoding |
| MSTRG.220854.1  | LOC100128531 | XLOC_227248 | 304 coding   | noncoding | coding    | noncoding |
| MSTRG.220870.1  | KIAA1671     | XLOC_227252 | 301 coding   | noncoding | noncoding | noncoding |
| MSTRG.221083.1  |              | XLOC_227281 | 209 coding   | noncoding | noncoding | noncoding |
| NM_001318245.2  | MYO18B       | XLOC_227301 | 8537 coding  | coding    | coding    | coding    |
| MSTRG.220991.1  | MYO18B       | XLOC_227303 | 288 coding   | noncoding | noncoding | noncoding |
| MSTRG.221029.1  | SEZ6L        | XLOC_227324 | 251 coding   | noncoding | noncoding | noncoding |
| MSTRG.221042.11 | SRRD         | XLOC_227329 | 3886 coding  | coding    | coding    | coding    |
| MSTRG.221053.1  |              | XLOC_227334 | 260 coding   | noncoding | noncoding | noncoding |
| MSTRG.221034.1  |              | XLOC_227336 | 268 coding   | noncoding | noncoding | noncoding |
| MSTRG.221351.1  | TTC28        | XLOC_227437 | 235 coding   | noncoding | noncoding | noncoding |
| MSTRG.221353.1  | TTC28        | XLOC_227439 | 236 coding   | noncoding | noncoding | noncoding |
| MSTRG.221360.1  | TTC28        | XLOC_227446 | 234 coding   | noncoding | noncoding | noncoding |
| MSTRG.221364.1  | TTC28        | XLOC_227449 | 341 coding   | noncoding | noncoding | noncoding |
| MSTRG.221391.1  | ZNRF3        | XLOC_227465 | 274 coding   | noncoding | noncoding | noncoding |
| MSTRG.221393.1  | ZNRF3        | XLOC_227466 | 222 coding   | noncoding | noncoding | noncoding |
| XM_017028902.2  | RFPL1        | XLOC_227502 | 4856 coding  | coding    | coding    | coding    |
| MSTRG.221452.1  | LOC107985541 | XLOC_227505 | 286 coding   | noncoding | noncoding | noncoding |

|                  |              |             |             |           |           |           |
|------------------|--------------|-------------|-------------|-----------|-----------|-----------|
| MSTRG. 221514. 6 | ASCC2        | XLOC_227522 | 2772 coding | coding    | coding    | coding    |
| MSTRG. 221548. 1 | MTMR3        | XLOC_227537 | 257 coding  | noncoding | noncoding | noncoding |
| MSTRG. 221623. 1 | SEC14L6      | XLOC_227587 | 342 coding  | noncoding | noncoding | noncoding |
| MSTRG. 221656. 1 | OSBP2        | XLOC_227597 | 320 coding  | noncoding | noncoding | noncoding |
| MSTRG. 221638. 1 |              | XLOC_227613 | 275 coding  | noncoding | noncoding | noncoding |
| MSTRG. 221641. 1 |              | XLOC_227614 | 266 coding  | noncoding | noncoding | noncoding |
| MSTRG. 221677. 1 |              | XLOC_227626 | 247 coding  | noncoding | noncoding | noncoding |
| MSTRG. 221744. 3 | EIF4ENIF1    | XLOC_227632 | 1970 coding | coding    | noncoding | noncoding |
| MSTRG. 221744. 5 | EIF4ENIF1    | XLOC_227632 | 903 coding  | coding    | noncoding | noncoding |
| MSTRG. 221707. 6 | PRR14L       | XLOC_227634 | 4251 coding | noncoding | noncoding | coding    |
| MSTRG. 221712. 1 |              | XLOC_227641 | 310 coding  | noncoding | noncoding | noncoding |
| MSTRG. 221726. 1 | LINC02558    | XLOC_227649 | 322 coding  | noncoding | noncoding | noncoding |
| MSTRG. 221732. 1 | SLC5A1       | XLOC_227654 | 307 coding  | noncoding | noncoding | noncoding |
| MSTRG. 221811. 1 | SYN3         | XLOC_227673 | 249 coding  | noncoding | noncoding | noncoding |
| MSTRG. 221851. 1 | SYN3         | XLOC_227703 | 221 coding  | noncoding | noncoding | noncoding |
| MSTRG. 221939. 1 | LARGE1       | XLOC_227721 | 320 coding  | noncoding | noncoding | noncoding |
| MSTRG. 221941. 1 | LARGE1       | XLOC_227723 | 230 coding  | noncoding | noncoding | noncoding |
| MSTRG. 221965. 1 | LARGE1       | XLOC_227733 | 384 coding  | noncoding | noncoding | noncoding |
| MSTRG. 221969. 1 | LARGE1       | XLOC_227736 | 264 coding  | noncoding | noncoding | noncoding |
| MSTRG. 221857. 1 |              | XLOC_227751 | 311 coding  | noncoding | noncoding | noncoding |
| MSTRG. 221860. 1 |              | XLOC_227752 | 276 coding  | noncoding | noncoding | noncoding |
| MSTRG. 221876. 1 | LINC01643    | XLOC_227757 | 321 coding  | noncoding | noncoding | noncoding |
| MSTRG. 221869. 1 |              | XLOC_227764 | 373 coding  | noncoding | noncoding | noncoding |
| MSTRG. 221997. 1 | TOM1         | XLOC_227791 | 311 coding  | noncoding | noncoding | noncoding |
| MSTRG. 222005. 1 |              | XLOC_227798 | 280 coding  | noncoding | noncoding | noncoding |
| MSTRG. 222066. 1 |              | XLOC_227814 | 305 coding  | noncoding | noncoding | noncoding |
| MSTRG. 222079. 7 | APOL2        | XLOC_227825 | 3708 coding | coding    | coding    | noncoding |
| MSTRG. 222049. 1 | LOC112268296 | XLOC_227829 | 249 coding  | noncoding | noncoding | noncoding |
| MSTRG. 222103. 4 | MYH9         | XLOC_227833 | 5570 coding | noncoding | coding    | noncoding |
| MSTRG. 222111. 1 | LOC105377199 | XLOC_227836 | 228 coding  | noncoding | noncoding | noncoding |
| MSTRG. 222122. 1 | CACNG2       | XLOC_227846 | 308 coding  | noncoding | noncoding | noncoding |
| MSTRG. 222153. 1 | TEX33        | XLOC_227865 | 258 coding  | coding    | noncoding | noncoding |
| XR_002958751. 1  | LOC112268295 | XLOC_227868 | 2233 coding | noncoding | noncoding | coding    |
| MSTRG. 222221. 1 | CARD10       | XLOC_227906 | 339 coding  | noncoding | noncoding | noncoding |
| MSTRG. 222242. 3 | LGALS2       | XLOC_227909 | 590 coding  | coding    | coding    | noncoding |
| NM_001172688. 2  | GGA1         | XLOC_227910 | 3206 coding | coding    | coding    | coding    |
| XM_017028761. 1  | GGA1         | XLOC_227910 | 4501 coding | coding    | coding    | coding    |
| MSTRG. 222248. 1 | PDXP         | XLOC_227915 | 254 coding  | noncoding | noncoding | noncoding |
| MSTRG. 222268. 1 | TRIOBP       | XLOC_227922 | 285 coding  | noncoding | noncoding | noncoding |
| MSTRG. 222271. 1 | TRIOBP       | XLOC_227924 | 252 coding  | noncoding | noncoding | noncoding |
| XR_002958677. 1  | GCAT         | XLOC_227928 | 1815 coding | coding    | coding    | coding    |
| MSTRG. 222308. 1 | MICALL1      | XLOC_227936 | 308 coding  | noncoding | noncoding | noncoding |
| MSTRG. 222315. 1 | POLR2F       | XLOC_227939 | 270 coding  | noncoding | noncoding | noncoding |

|                  |              |             |             |           |           |           |
|------------------|--------------|-------------|-------------|-----------|-----------|-----------|
| MSTRG. 222316. 1 | POLR2F       | XLOC_227940 | 255 coding  | noncoding | noncoding | noncoding |
| MSTRG. 222296. 1 | SLC16A8      | XLOC_227946 | 258 coding  | noncoding | noncoding | noncoding |
| MSTRG. 222303. 1 | BAIAP2L2     | XLOC_227949 | 248 coding  | coding    | noncoding | noncoding |
| MSTRG. 222350. 1 |              | XLOC_227955 | 303 coding  | noncoding | noncoding | noncoding |
| MSTRG. 222355. 1 | CSNK1E       | XLOC_227959 | 246 coding  | noncoding | noncoding | noncoding |
| MSTRG. 222372. 8 | DDX17        | XLOC_227968 | 2056 coding | coding    | coding    | coding    |
| XR_001755378. 1  | GTPBP1       | XLOC_227974 | 6142 coding | coding    | coding    | coding    |
| NM_001363781. 1  | APOBEC3D     | XLOC_227994 | 1937 coding | coding    | coding    | coding    |
| XR_001755547. 1  | LOC107985563 | XLOC_227995 | 1382 coding | noncoding | noncoding | noncoding |
| NM_021822. 4     | APOBEC3G     | XLOC_227996 | 1564 coding | coding    | coding    | coding    |
| XR_938259. 2     | LOC101927202 | XLOC_227998 | 1221 coding | coding    | coding    | noncoding |
| MSTRG. 222421. 1 | APOBEC3H     | XLOC_228001 | 287 coding  | noncoding | noncoding | noncoding |
| MSTRG. 222475. 1 | TAB1         | XLOC_228019 | 317 coding  | noncoding | noncoding | noncoding |
| MSTRG. 222479. 1 |              | XLOC_228022 | 266 coding  | noncoding | noncoding | noncoding |
| MSTRG. 222504. 1 | CACNA1I      | XLOC_228033 | 301 coding  | noncoding | noncoding | noncoding |
| MSTRG. 222657. 1 | TNRC6B       | XLOC_228094 | 267 coding  | noncoding | noncoding | noncoding |
| NM_000026. 4     | ADSL         | XLOC_228110 | 4359 coding | coding    | coding    | coding    |
| MSTRG. 222593. 3 | XPNPEP3      | XLOC_228125 | 302 coding  | coding    | noncoding | noncoding |
| MSTRG. 222595. 1 | XPNPEP3      | XLOC_228126 | 246 coding  | noncoding | noncoding | noncoding |
| MSTRG. 222574. 1 |              | XLOC_228129 | 260 coding  | noncoding | noncoding | noncoding |
| MSTRG. 222583. 1 |              | XLOC_228133 | 270 coding  | noncoding | noncoding | noncoding |
| MSTRG. 222584. 1 |              | XLOC_228134 | 286 coding  | noncoding | noncoding | noncoding |
| MSTRG. 222585. 1 |              | XLOC_228135 | 262 coding  | noncoding | noncoding | noncoding |
| MSTRG. 222606. 1 | EP300        | XLOC_228142 | 256 coding  | noncoding | noncoding | noncoding |
| XM_024452279. 1  | L3MBTL2      | XLOC_228149 | 3391 coding | coding    | coding    | coding    |
| MSTRG. 222714. 1 | RANGAP1      | XLOC_228153 | 252 coding  | noncoding | noncoding | noncoding |
| MSTRG. 222703. 1 | TEF          | XLOC_228157 | 318 coding  | noncoding | noncoding | noncoding |
| XR_001755173. 2  | MEI1         | XLOC_228175 | 4624 coding | noncoding | coding    | coding    |
| MSTRG. 222791. 1 | MEI1         | XLOC_228176 | 232 coding  | noncoding | noncoding | noncoding |
| MSTRG. 222793. 1 | MEI1         | XLOC_228177 | 297 coding  | noncoding | noncoding | noncoding |
| MSTRG. 222795. 1 | MEI1         | XLOC_228178 | 263 coding  | noncoding | noncoding | noncoding |
| NR_103834. 1     | SREBF2       | XLOC_228184 | 5786 coding | coding    | coding    | coding    |
| XM_017028922. 2  | SREBF2       | XLOC_228184 | 3003 coding | coding    | coding    | coding    |
| XM_017028921. 2  | SREBF2       | XLOC_228184 | 3767 coding | coding    | coding    | coding    |
| MSTRG. 222758. 1 | MIR3781      | XLOC_228193 | 2459 coding | noncoding | noncoding | noncoding |
| MSTRG. 222768. 1 |              | XLOC_228200 | 296 coding  | noncoding | noncoding | noncoding |
| MSTRG. 222860. 1 |              | XLOC_228234 | 262 coding  | noncoding | noncoding | noncoding |
| MSTRG. 222887. 1 | BIK          | XLOC_228246 | 329 coding  | noncoding | noncoding | noncoding |
| MSTRG. 222896. 1 | MCAT         | XLOC_228250 | 207 coding  | noncoding | noncoding | noncoding |
| MSTRG. 222979. 1 | EFCAB6       | XLOC_228276 | 248 coding  | noncoding | noncoding | noncoding |
| MSTRG. 222967. 1 | PNPLA3       | XLOC_228287 | 295 coding  | noncoding | noncoding | noncoding |
| MSTRG. 223005. 1 | PARVB        | XLOC_228298 | 407 coding  | noncoding | noncoding | noncoding |
| MSTRG. 223044. 1 |              | XLOC_228322 | 405 coding  | noncoding | noncoding | noncoding |

|                  |              |             |             |           |           |           |
|------------------|--------------|-------------|-------------|-----------|-----------|-----------|
| MSTRG. 223046. 1 |              | XLOC_228325 | 239 coding  | noncoding | noncoding | noncoding |
| NM_001017526. 1  | ARHGAP8      | XLOC_228327 | 1725 coding | coding    | coding    | coding    |
| MSTRG. 223081. 1 | PRR5-ARHGAP8 | XLOC_228331 | 253 coding  | noncoding | noncoding | noncoding |
| MSTRG. 223049. 1 |              | XLOC_228333 | 301 coding  | noncoding | noncoding | noncoding |
| MSTRG. 223052. 1 |              | XLOC_228340 | 229 coding  | noncoding | noncoding | noncoding |
| MSTRG. 223057. 1 |              | XLOC_228344 | 244 coding  | noncoding | noncoding | noncoding |
| MSTRG. 223163. 1 | ATXN10       | XLOC_228373 | 286 coding  | noncoding | noncoding | noncoding |
| XM_011530260. 3  | TTC38        | XLOC_228415 | 2195 coding | noncoding | coding    | coding    |
| MSTRG. 223260. 1 | CELSR1       | XLOC_228420 | 258 coding  | coding    | noncoding | noncoding |
| MSTRG. 223267. 1 | CELSR1       | XLOC_228425 | 246 coding  | noncoding | noncoding | noncoding |
| MSTRG. 223543. 1 | TBC1D22A     | XLOC_228463 | 207 coding  | coding    | noncoding | noncoding |
| NR_144462. 2     | LOC339685    | XLOC_228491 | 4362 coding | noncoding | coding    | noncoding |
| MSTRG. 223356. 1 | LOC284930    | XLOC_228514 | 265 coding  | noncoding | noncoding | noncoding |
| MSTRG. 223343. 1 |              | XLOC_228515 | 261 coding  | noncoding | noncoding | noncoding |
| MSTRG. 223364. 1 |              | XLOC_228522 | 279 coding  | noncoding | noncoding | noncoding |
| MSTRG. 223365. 1 |              | XLOC_228525 | 321 coding  | noncoding | noncoding | noncoding |
| MSTRG. 223371. 1 |              | XLOC_228527 | 314 coding  | noncoding | noncoding | noncoding |
| MSTRG. 223378. 1 |              | XLOC_228534 | 314 coding  | noncoding | noncoding | noncoding |
| MSTRG. 223413. 1 |              | XLOC_228553 | 298 coding  | noncoding | noncoding | noncoding |
| MSTRG. 223430. 1 |              | XLOC_228578 | 255 coding  | noncoding | noncoding | noncoding |
| XM_005261738. 5  | CRELD2       | XLOC_228593 | 2135 coding | coding    | coding    | coding    |
| XR_002958704. 1  | MOV10L1      | XLOC_228604 | 5181 coding | coding    | coding    | coding    |
| MSTRG. 223615. 3 | PLXNB2       | XLOC_228624 | 6365 coding | coding    | coding    | coding    |
| XM_017029119. 1  | PPP6R2       | XLOC_228627 | 4315 coding | coding    | coding    | coding    |
| MSTRG. 223616. 1 |              | XLOC_228634 | 254 coding  | noncoding | noncoding | noncoding |
| MSTRG. 223666. 4 | LOC107985568 | XLOC_228646 | 984 coding  | coding    | noncoding | noncoding |
| MSTRG. 220037. 1 |              | XLOC_228663 | 272 coding  | noncoding | noncoding | noncoding |
| MSTRG. 220049. 1 |              | XLOC_228670 | 422 coding  | noncoding | noncoding | noncoding |
| MSTRG. 220068. 1 |              | XLOC_228672 | 214 coding  | noncoding | noncoding | noncoding |
| MSTRG. 220071. 1 |              | XLOC_228673 | 239 coding  | noncoding | noncoding | noncoding |
| MSTRG. 220074. 1 |              | XLOC_228675 | 280 coding  | noncoding | noncoding | noncoding |
| MSTRG. 220078. 1 |              | XLOC_228677 | 249 coding  | noncoding | noncoding | noncoding |
| MSTRG. 220101. 1 |              | XLOC_228684 | 239 coding  | coding    | noncoding | noncoding |
| MSTRG. 220111. 1 |              | XLOC_228693 | 270 coding  | noncoding | noncoding | noncoding |
| MSTRG. 220141. 1 |              | XLOC_228719 | 304 coding  | coding    | noncoding | noncoding |
| MSTRG. 220146. 1 |              | XLOC_228723 | 211 coding  | noncoding | noncoding | noncoding |
| XM_017028600. 1  | XKR3         | XLOC_228724 | 1719 coding | coding    | coding    | coding    |
| MSTRG. 220262. 4 | IL17RA       | XLOC_228743 | 4609 coding | coding    | coding    | noncoding |
| MSTRG. 220245. 1 | ADA2         | XLOC_228750 | 271 coding  | noncoding | noncoding | noncoding |
| MSTRG. 220253. 1 | CECR2        | XLOC_228754 | 268 coding  | noncoding | noncoding | noncoding |
| MSTRG. 220257. 1 | CECR2        | XLOC_228755 | 267 coding  | noncoding | noncoding | noncoding |
| MSTRG. 220258. 1 | CECR2        | XLOC_228756 | 234 coding  | noncoding | noncoding | noncoding |
| MSTRG. 220284. 1 | BCL2L13      | XLOC_228762 | 264 coding  | noncoding | noncoding | noncoding |

|                   |              |             |             |           |           |           |
|-------------------|--------------|-------------|-------------|-----------|-----------|-----------|
| MSTRG. 220285. 5  | BCL2L13      | XLOC_228763 | 2097 coding | noncoding | coding    | coding    |
| MSTRG. 220350. 1  | MICAL3       | XLOC_228777 | 257 coding  | noncoding | noncoding | noncoding |
| MSTRG. 220289. 1  |              | XLOC_228780 | 270 coding  | noncoding | noncoding | noncoding |
| MSTRG. 220310. 1  |              | XLOC_228784 | 225 coding  | noncoding | noncoding | noncoding |
| MSTRG. 220357. 1  |              | XLOC_228793 | 311 coding  | noncoding | noncoding | noncoding |
| MSTRG. 220383. 1  | DGCR5        | XLOC_228804 | 237 coding  | coding    | noncoding | noncoding |
| NR_134304. 1      | ESS2         | XLOC_228814 | 5462 coding | coding    | coding    | coding    |
| MSTRG. 220374. 1  |              | XLOC_228817 | 294 coding  | noncoding | noncoding | noncoding |
| MSTRG. 220451. 1  | CLTCL1       | XLOC_228825 | 302 coding  | noncoding | noncoding | noncoding |
| MSTRG. 220467. 1  | HIRA         | XLOC_228837 | 455 coding  | noncoding | noncoding | noncoding |
| MSTRG. 220410. 1  |              | XLOC_228852 | 251 coding  | noncoding | noncoding | noncoding |
| MSTRG. 220419. 1  | TBX1         | XLOC_228857 | 226 coding  | noncoding | coding    | noncoding |
| MSTRG. 220426. 1  | GNB1L        | XLOC_228863 | 252 coding  | noncoding | noncoding | noncoding |
| MSTRG. 220551. 6  | TANGO2       | XLOC_228872 | 3313 coding | coding    | coding    | noncoding |
| MSTRG. 220557. 1  |              | XLOC_228875 | 226 coding  | noncoding | noncoding | noncoding |
| MSTRG. 220522. 1  |              | XLOC_228901 | 259 coding  | noncoding | noncoding | noncoding |
| MSTRG. 220530. 1  |              | XLOC_228906 | 357 coding  | noncoding | noncoding | noncoding |
| MSTRG. 220537. 1  | USP41        | XLOC_228910 | 340 coding  | noncoding | noncoding | noncoding |
| MSTRG. 220545. 1  | ZNF74        | XLOC_228913 | 401 coding  | noncoding | noncoding | noncoding |
| MSTRG. 220585. 8  | MED15        | XLOC_228923 | 3488 coding | coding    | coding    | coding    |
| MSTRG. 220581. 1  | TMEM191A     | XLOC_228926 | 384 coding  | noncoding | noncoding | noncoding |
| MSTRG. 220620. 1  | PI4KA        | XLOC_228932 | 287 coding  | noncoding | noncoding | noncoding |
| MSTRG. 220623. 1  | SERPIND1     | XLOC_228934 | 232 coding  | noncoding | noncoding | noncoding |
| MSTRG. 220624. 1  | PI4KA        | XLOC_228935 | 371 coding  | noncoding | noncoding | noncoding |
| MSTRG. 220588. 1  |              | XLOC_228938 | 312 coding  | noncoding | noncoding | noncoding |
| MSTRG. 220637. 1  | AIFM3        | XLOC_228942 | 240 coding  | coding    | noncoding | noncoding |
| MSTRG. 220651. 1  | UBE2L3       | XLOC_228967 | 272 coding  | noncoding | noncoding | noncoding |
| MSTRG. 220672. 3  | MAPK1        | XLOC_228973 | 1187 coding | coding    | coding    | noncoding |
| MSTRG. 220662. 1  |              | XLOC_228984 | 297 coding  | noncoding | noncoding | noncoding |
| MSTRG. 220664. 1  |              | XLOC_228985 | 349 coding  | noncoding | noncoding | noncoding |
| MSTRG. 220691. 11 | TOP3B        | XLOC_228990 | 290 coding  | noncoding | noncoding | noncoding |
| XR_938059. 2      | LOC102724653 | XLOC_228996 | 1983 coding | noncoding | noncoding | noncoding |
| MSTRG. 220914. 1  | IGLVI-70     | XLOC_228999 | 261 coding  | noncoding | noncoding | noncoding |
| MSTRG. 220966. 29 | IGLVI-70     | XLOC_229023 | 821 coding  | coding    | noncoding | noncoding |
| MSTRG. 220969. 1  | IGLVI-70     | XLOC_229025 | 253 coding  | coding    | noncoding | noncoding |
| MSTRG. 220707. 1  | PCAT14       | XLOC_229055 | 233 coding  | noncoding | noncoding | noncoding |
| MSTRG. 220776. 1  |              | XLOC_229083 | 255 coding  | noncoding | noncoding | noncoding |
| MSTRG. 220781. 1  | GGT5         | XLOC_229085 | 273 coding  | noncoding | noncoding | noncoding |
| MSTRG. 220782. 1  | GGT5         | XLOC_229086 | 202 coding  | noncoding | noncoding | noncoding |
| MSTRG. 220778. 1  | POM121L9P    | XLOC_229087 | 482 coding  | coding    | noncoding | noncoding |
| MSTRG. 220897. 1  | UPB1         | XLOC_229093 | 1056 coding | coding    | noncoding | coding    |
| MSTRG. 220999. 1  | MYO18B       | XLOC_229164 | 282 coding  | noncoding | noncoding | noncoding |
| MSTRG. 221002. 1  | MYO18B       | XLOC_229165 | 237 coding  | noncoding | noncoding | noncoding |

|                 |              |             |             |           |           |           |
|-----------------|--------------|-------------|-------------|-----------|-----------|-----------|
| MSTRG_221033.1  |              | XLOC_229195 | 278 coding  | noncoding | noncoding | noncoding |
| MSTRG_221035.1  |              | XLOC_229196 | 269 coding  | noncoding | noncoding | noncoding |
| MSTRG_221170.1  | LOC105372981 | XLOC_229274 | 238 coding  | noncoding | noncoding | noncoding |
| MSTRG_221178.1  |              | XLOC_229278 | 298 coding  | noncoding | noncoding | noncoding |
| NM_002430.3     | MN1          | XLOC_229284 | 7814 coding | noncoding | coding    | coding    |
| MSTRG_221290.1  | TTC28-AS1    | XLOC_229302 | 219 coding  | noncoding | noncoding | noncoding |
| MSTRG_221333.1  | TTC28        | XLOC_229330 | 303 coding  | noncoding | noncoding | noncoding |
| MSTRG_221265.1  | CHEK2        | XLOC_229344 | 300 coding  | noncoding | noncoding | noncoding |
| MSTRG_221266.1  | CHEK2        | XLOC_229345 | 296 coding  | noncoding | noncoding | noncoding |
| MSTRG_221408.1  | ZNRF3        | XLOC_229371 | 207 coding  | noncoding | noncoding | noncoding |
| NM_015370.1     | C22orf31     | XLOC_229379 | 1070 coding | coding    | coding    | coding    |
| MSTRG_221437.1  | KREMEN1      | XLOC_229385 | 292 coding  | noncoding | noncoding | noncoding |
| XM_006724347.1  | THOC5        | XLOC_229406 | 2706 coding | coding    | coding    | coding    |
| MSTRG_221488.1  |              | XLOC_229415 | 241 coding  | noncoding | noncoding | noncoding |
| NM_032204.5     | ASCC2        | XLOC_229423 | 2790 coding | coding    | coding    | coding    |
| NM_001369927.1  | ASCC2        | XLOC_229423 | 2631 coding | coding    | coding    | coding    |
| NM_001369931.1  | ASCC2        | XLOC_229423 | 3050 coding | coding    | coding    | coding    |
| NM_001369925.1  | ASCC2        | XLOC_229423 | 2646 coding | coding    | coding    | coding    |
| NM_001369920.1  | ASCC2        | XLOC_229423 | 2805 coding | coding    | coding    | coding    |
| MSTRG_221532.6  | MTMR3        | XLOC_229425 | 2835 coding | noncoding | coding    | noncoding |
| MSTRG_221532.15 | HORMAD2-AS1  | XLOC_229425 | 1793 coding | coding    | coding    | noncoding |
| MSTRG_221572.1  | HORMAD2      | XLOC_229434 | 257 coding  | noncoding | noncoding | noncoding |
| MSTRG_221610.1  | SF3A1        | XLOC_229448 | 261 coding  | noncoding | noncoding | noncoding |
| NM_005877.6     | SF3A1        | XLOC_229449 | 5090 coding | coding    | coding    | coding    |
| MSTRG_221600.10 | SEC14L3      | XLOC_229464 | 1836 coding | noncoding | coding    | noncoding |
| MSTRG_221659.1  | OSBP2        | XLOC_229478 | 361 coding  | noncoding | noncoding | noncoding |
| NR_146603.1     | LOC107985544 | XLOC_229481 | 4461 coding | noncoding | noncoding | coding    |
| MSTRG_221637.1  |              | XLOC_229486 | 275 coding  | noncoding | noncoding | noncoding |
| MSTRG_221639.1  |              | XLOC_229487 | 300 coding  | noncoding | noncoding | noncoding |
| MSTRG_221640.1  |              | XLOC_229488 | 239 coding  | noncoding | noncoding | noncoding |
| MSTRG_221643.1  |              | XLOC_229493 | 236 coding  | noncoding | noncoding | noncoding |
| MSTRG_221679.3  | RNF185       | XLOC_229495 | 656 coding  | coding    | noncoding | noncoding |
| MSTRG_221676.1  |              | XLOC_229519 | 248 coding  | noncoding | noncoding | noncoding |
| MSTRG_221746.1  |              | XLOC_229522 | 232 coding  | noncoding | noncoding | noncoding |
| MSTRG_221708.1  | PRR14L       | XLOC_229534 | 262 coding  | noncoding | noncoding | noncoding |
| MSTRG_221725.1  | LINC02558    | XLOC_229545 | 300 coding  | noncoding | noncoding | noncoding |
| MSTRG_221775.1  | SLC5A4       | XLOC_229558 | 257 coding  | noncoding | noncoding | noncoding |
| MSTRG_221777.1  | SLC5A4       | XLOC_229559 | 252 coding  | noncoding | noncoding | noncoding |
| MSTRG_221952.1  | LARGE1       | XLOC_229599 | 311 coding  | noncoding | noncoding | noncoding |
| MSTRG_221963.1  | LARGE-AS1    | XLOC_229606 | 261 coding  | noncoding | noncoding | noncoding |
| MSTRG_221974.1  | LARGE1       | XLOC_229610 | 255 coding  | noncoding | noncoding | noncoding |
| MSTRG_221858.1  |              | XLOC_229612 | 311 coding  | noncoding | noncoding | noncoding |
| MSTRG_221861.1  |              | XLOC_229613 | 276 coding  | noncoding | noncoding | noncoding |

|                   |           |             |             |           |           |           |
|-------------------|-----------|-------------|-------------|-----------|-----------|-----------|
| MSTRG. 221875. 1  | LINC01643 | XLOC_229615 | 321 coding  | noncoding | noncoding | noncoding |
| MSTRG. 221878. 1  | LINC01643 | XLOC_229616 | 263 coding  | noncoding | noncoding | noncoding |
| MSTRG. 221864. 1  |           | XLOC_229622 | 270 coding  | noncoding | noncoding | noncoding |
| MSTRG. 222004. 1  |           | XLOC_229664 | 262 coding  | noncoding | noncoding | noncoding |
| MSTRG. 222026. 8  | APOL6     | XLOC_229668 | 6999 coding | noncoding | noncoding | noncoding |
| MSTRG. 222064. 1  |           | XLOC_229691 | 227 coding  | noncoding | noncoding | noncoding |
| MSTRG. 222065. 1  |           | XLOC_229692 | 305 coding  | noncoding | noncoding | noncoding |
| MSTRG. 222094. 1  |           | XLOC_229711 | 246 coding  | noncoding | noncoding | noncoding |
| MSTRG. 222099. 1  |           | XLOC_229715 | 354 coding  | noncoding | noncoding | noncoding |
| NM_006078. 4      | CACNG2    | XLOC_229722 | 4736 coding | coding    | coding    | coding    |
| MSTRG. 222121. 1  | CACNG2    | XLOC_229723 | 308 coding  | noncoding | noncoding | noncoding |
| MSTRG. 222157. 1  | CSF2RB    | XLOC_229736 | 5727 coding | noncoding | coding    | noncoding |
| XM_006724311. 3   | SSTR3     | XLOC_229759 | 5710 coding | coding    | coding    | coding    |
| MSTRG. 222222. 1  | CARD10    | XLOC_229778 | 211 coding  | noncoding | noncoding | noncoding |
| MSTRG. 222219. 1  |           | XLOC_229779 | 259 coding  | noncoding | noncoding | noncoding |
| MSTRG. 222223. 1  |           | XLOC_229780 | 247 coding  | noncoding | noncoding | noncoding |
| MSTRG. 222277. 3  | TRIOBP    | XLOC_229798 | 3059 coding | coding    | coding    | noncoding |
| NM_001349853. 1   | ANKRD54   | XLOC_229802 | 2753 coding | coding    | coding    | coding    |
| MSTRG. 222306. 1  | MICALL1   | XLOC_229806 | 277 coding  | noncoding | noncoding | noncoding |
| MSTRG. 222307. 1  | MICALL1   | XLOC_229807 | 308 coding  | noncoding | noncoding | noncoding |
| MSTRG. 222309. 1  | MICALL1   | XLOC_229808 | 734 coding  | noncoding | noncoding | noncoding |
| NM_006941. 3      | SOX10     | XLOC_229813 | 2862 coding | coding    | coding    | coding    |
| MSTRG. 222291. 1  |           | XLOC_229817 | 226 coding  | noncoding | noncoding | noncoding |
| XM_017028685. 1   | SLC16A8   | XLOC_229819 | 1951 coding | coding    | coding    | coding    |
| MSTRG. 222338. 1  | TMEM184B  | XLOC_229833 | 265 coding  | noncoding | noncoding | noncoding |
| NM_152868. 2      | KCNJ4     | XLOC_229851 | 2065 coding | coding    | coding    | coding    |
| MSTRG. 222378. 1  | DMC1      | XLOC_229857 | 226 coding  | noncoding | noncoding | noncoding |
| MSTRG. 222403. 1  | FAM227A   | XLOC_229862 | 306 coding  | noncoding | noncoding | noncoding |
| NM_014293. 4      | NPTXR     | XLOC_229872 | 5830 coding | coding    | coding    | coding    |
| MSTRG. 222445. 15 | APOBEC3A  | XLOC_229876 | 1489 coding | coding    | coding    | noncoding |
| NM_001346743. 2   | CBX7      | XLOC_229883 | 4108 coding | coding    | coding    | coding    |
| MSTRG. 222424. 1  |           | XLOC_229888 | 245 coding  | noncoding | noncoding | noncoding |
| NM_002608. 4      | PDGFB     | XLOC_229891 | 3728 coding | coding    | coding    | coding    |
| MSTRG. 222493. 4  | ATF4      | XLOC_229911 | 1909 coding | coding    | coding    | coding    |
| MSTRG. 222493. 6  | ATF4      | XLOC_229911 | 1562 coding | coding    | noncoding | noncoding |
| MSTRG. 222507. 1  | CACNA1I   | XLOC_229916 | 325 coding  | coding    | noncoding | noncoding |
| XM_006724149. 3   | ENTHD1    | XLOC_229926 | 3305 coding | coding    | coding    | coding    |
| MSTRG. 222525. 1  | ENTHD1    | XLOC_229933 | 293 coding  | noncoding | noncoding | noncoding |
| MSTRG. 222553. 1  |           | XLOC_229968 | 241 coding  | noncoding | noncoding | noncoding |
| MSTRG. 222557. 1  |           | XLOC_229971 | 273 coding  | coding    | noncoding | noncoding |
| MSTRG. 222572. 1  | SLC25A17  | XLOC_229982 | 253 coding  | noncoding | noncoding | noncoding |
| MSTRG. 222573. 1  |           | XLOC_229987 | 260 coding  | noncoding | noncoding | noncoding |
| MSTRG. 222586. 1  |           | XLOC_229990 | 246 coding  | noncoding | noncoding | noncoding |

|                  |              |             |              |           |           |           |
|------------------|--------------|-------------|--------------|-----------|-----------|-----------|
| MSTRG. 222587. 1 |              | XLOC_229991 | 322 coding   | noncoding | noncoding | noncoding |
| MSTRG. 222713. 1 | RANGAP1      | XLOC_230002 | 300 coding   | noncoding | noncoding | noncoding |
| MSTRG. 222724. 1 | ZC3H7B       | XLOC_230011 | 314 coding   | coding    | noncoding | noncoding |
| MSTRG. 222733. 1 | PHF5A        | XLOC_230025 | 268 coding   | noncoding | noncoding | noncoding |
| MSTRG. 222734. 1 |              | XLOC_230027 | 274 coding   | noncoding | noncoding | noncoding |
| MSTRG. 222753. 1 | SNU13        | XLOC_230035 | 233 coding   | noncoding | noncoding | noncoding |
| MSTRG. 222792. 1 | MEI1         | XLOC_230038 | 297 coding   | noncoding | noncoding | noncoding |
| MSTRG. 222794. 1 | MEI1         | XLOC_230039 | 236 coding   | noncoding | noncoding | noncoding |
| NR_157279. 1     | SREBF2-AS1   | XLOC_230044 | 2989 coding  | noncoding | coding    | noncoding |
| XR_001755557. 1  | LOC107985551 | XLOC_230061 | 263 coding   | noncoding | noncoding | noncoding |
| MSTRG. 222874. 1 | SERHL2       | XLOC_230093 | 229 coding   | noncoding | noncoding | noncoding |
| MSTRG. 222853. 1 |              | XLOC_230101 | 227 coding   | noncoding | noncoding | noncoding |
| MSTRG. 222859. 1 |              | XLOC_230102 | 762 coding   | noncoding | noncoding | noncoding |
| MSTRG. 222866. 1 |              | XLOC_230107 | 275 coding   | noncoding | noncoding | noncoding |
| MSTRG. 222908. 1 | PACSIN2      | XLOC_230112 | 210 coding   | noncoding | noncoding | noncoding |
| MSTRG. 222930. 1 | PACSIN2      | XLOC_230132 | 493 coding   | noncoding | noncoding | noncoding |
| MSTRG. 222888. 1 | BIK          | XLOC_230140 | 231 coding   | noncoding | noncoding | noncoding |
| MSTRG. 222955. 1 | SCUBE1       | XLOC_230150 | 255 coding   | noncoding | noncoding | noncoding |
| XR_937896. 3     | EFCAB6       | XLOC_230157 | 5800 coding  | coding    | coding    | coding    |
| MSTRG. 222978. 1 | EFCAB6       | XLOC_230160 | 310 coding   | noncoding | noncoding | noncoding |
| MSTRG. 222981. 1 | EFCAB6       | XLOC_230161 | 284 coding   | noncoding | noncoding | noncoding |
| MSTRG. 222968. 1 |              | XLOC_230167 | 268 coding   | noncoding | noncoding | noncoding |
| MSTRG. 223138. 1 | KIAA0930     | XLOC_230222 | 294 coding   | noncoding | noncoding | noncoding |
| MSTRG. 223085. 1 |              | XLOC_230224 | 316 coding   | noncoding | noncoding | noncoding |
| MSTRG. 223094. 1 |              | XLOC_230234 | 282 coding   | noncoding | noncoding | noncoding |
| MSTRG. 223110. 1 | LOC105373069 | XLOC_230244 | 316 coding   | noncoding | noncoding | noncoding |
| MSTRG. 223268. 1 | CELSR1       | XLOC_230317 | 246 coding   | noncoding | noncoding | noncoding |
| MSTRG. 223307. 1 |              | XLOC_230364 | 260 coding   | noncoding | noncoding | noncoding |
| MSTRG. 223315. 1 | LOC339685    | XLOC_230367 | 267 coding   | noncoding | noncoding | noncoding |
| MSTRG. 223357. 1 | LOC284930    | XLOC_230382 | 265 coding   | noncoding | noncoding | noncoding |
| MSTRG. 223363. 1 | LOC107985581 | XLOC_230387 | 332 coding   | noncoding | noncoding | noncoding |
| MSTRG. 223387. 1 |              | XLOC_230406 | 281 coding   | noncoding | noncoding | noncoding |
| XM_024452238. 1  | C22orf34     | XLOC_230418 | 19010 coding | noncoding | coding    | coding    |
| MSTRG. 223508. 1 | C22orf34     | XLOC_230429 | 259 coding   | noncoding | noncoding | noncoding |
| MSTRG. 223429. 1 |              | XLOC_230438 | 431 coding   | noncoding | noncoding | noncoding |
| XM_017028722. 2  | BRD1         | XLOC_230439 | 3596 coding  | coding    | coding    | coding    |
| XM_017028798. 1  | IL17REL      | XLOC_230455 | 5062 coding  | coding    | coding    | coding    |
| MSTRG. 223483. 1 | MOV10L1      | XLOC_230461 | 274 coding   | coding    | noncoding | noncoding |
| NM_001303252. 2  | MAPK12       | XLOC_230472 | 1875 coding  | coding    | coding    | coding    |
| MSTRG. 223622. 5 | PPP6R2       | XLOC_230478 | 465 coding   | noncoding | noncoding | noncoding |
| MSTRG. 223619. 1 | ADM2         | XLOC_230482 | 305 coding   | noncoding | noncoding | noncoding |
| MSTRG. 223682. 2 | RPL23AP82    | XLOC_230511 | 1184 coding  | coding    | noncoding | noncoding |
| MSTRG. 223732. 1 | DHR SX       | XLOC_230549 | 296 coding   | noncoding | noncoding | noncoding |

|                  |              |             |             |           |           |           |
|------------------|--------------|-------------|-------------|-----------|-----------|-----------|
| MSTRG. 223738. 1 |              | XLOC_230558 | 231 coding  | noncoding | noncoding | noncoding |
| NM_001321367. 2  | CD99         | XLOC_230559 | 3622 coding | coding    | coding    | coding    |
| XM_017029929. 1  | GYG2         | XLOC_230561 | 3502 coding | coding    | coding    | coding    |
| MSTRG. 223800. 1 |              | XLOC_230582 | 283 coding  | noncoding | noncoding | noncoding |
| MSTRG. 223842. 1 | FAM239A      | XLOC_230585 | 534 coding  | noncoding | noncoding | noncoding |
| MSTRG. 223812. 1 |              | XLOC_230586 | 241 coding  | noncoding | noncoding | noncoding |
| MSTRG. 223816. 1 |              | XLOC_230589 | 280 coding  | noncoding | noncoding | noncoding |
| MSTRG. 223822. 1 |              | XLOC_230591 | 261 coding  | noncoding | noncoding | noncoding |
| MSTRG. 223849. 1 |              | XLOC_230600 | 314 coding  | noncoding | noncoding | noncoding |
| MSTRG. 223857. 1 |              | XLOC_230605 | 282 coding  | noncoding | noncoding | noncoding |
| MSTRG. 223862. 1 |              | XLOC_230607 | 255 coding  | coding    | noncoding | noncoding |
| MSTRG. 223866. 1 |              | XLOC_230610 | 376 coding  | noncoding | noncoding | noncoding |
| MSTRG. 223927. 1 | PUDP         | XLOC_230634 | 271 coding  | noncoding | noncoding | noncoding |
| MSTRG. 223949. 1 | PUDP         | XLOC_230652 | 381 coding  | noncoding | noncoding | coding    |
| MSTRG. 223990. 1 |              | XLOC_230672 | 301 coding  | noncoding | noncoding | noncoding |
| MSTRG. 224068. 1 | LOC107985675 | XLOC_230682 | 253 coding  | coding    | noncoding | noncoding |
| MSTRG. 224009. 1 | ANOS1        | XLOC_230695 | 761 coding  | noncoding | noncoding | noncoding |
| MSTRG. 224015. 1 |              | XLOC_230703 | 256 coding  | noncoding | noncoding | noncoding |
| MSTRG. 224020. 1 |              | XLOC_230707 | 225 coding  | noncoding | noncoding | noncoding |
| MSTRG. 224036. 1 |              | XLOC_230712 | 280 coding  | noncoding | noncoding | noncoding |
| MSTRG. 224026. 1 |              | XLOC_230724 | 290 coding  | noncoding | noncoding | noncoding |
| MSTRG. 224027. 1 |              | XLOC_230725 | 263 coding  | noncoding | noncoding | noncoding |
| MSTRG. 224124. 1 | WWC3         | XLOC_230773 | 340 coding  | noncoding | noncoding | noncoding |
| MSTRG. 224151. 1 |              | XLOC_230790 | 400 coding  | coding    | noncoding | noncoding |
| MSTRG. 224159. 1 | MID1         | XLOC_230794 | 276 coding  | noncoding | noncoding | noncoding |
| MSTRG. 224173. 1 | MID1         | XLOC_230800 | 277 coding  | noncoding | noncoding | noncoding |
| MSTRG. 224298. 1 | FRMPD4       | XLOC_230842 | 248 coding  | noncoding | noncoding | noncoding |
| MSTRG. 224313. 1 | FRMPD4       | XLOC_230850 | 281 coding  | noncoding | noncoding | noncoding |
| MSTRG. 224320. 1 | FRMPD4       | XLOC_230853 | 293 coding  | noncoding | noncoding | noncoding |
| MSTRG. 224328. 1 | FRMPD4       | XLOC_230858 | 323 coding  | noncoding | noncoding | noncoding |
| MSTRG. 224389. 1 | LINC01203    | XLOC_230888 | 210 coding  | noncoding | noncoding | noncoding |
| MSTRG. 224392. 1 |              | XLOC_230892 | 263 coding  | coding    | noncoding | noncoding |
| MSTRG. 224401. 1 |              | XLOC_230893 | 224 coding  | noncoding | noncoding | noncoding |
| MSTRG. 224405. 1 |              | XLOC_230895 | 354 coding  | noncoding | noncoding | noncoding |
| MSTRG. 224410. 1 |              | XLOC_230901 | 712 coding  | noncoding | coding    | noncoding |
| MSTRG. 224478. 1 | LOC107985656 | XLOC_230905 | 329 coding  | noncoding | noncoding | noncoding |
| MSTRG. 224484. 2 | OFD1         | XLOC_230911 | 5138 coding | coding    | coding    | coding    |
| MSTRG. 224492. 1 | GPM6B        | XLOC_230915 | 483 coding  | noncoding | noncoding | noncoding |
| MSTRG. 224497. 1 | GPM6B        | XLOC_230918 | 306 coding  | noncoding | noncoding | noncoding |
| MSTRG. 224425. 1 |              | XLOC_230923 | 294 coding  | noncoding | noncoding | noncoding |
| MSTRG. 224435. 1 |              | XLOC_230928 | 329 coding  | noncoding | noncoding | noncoding |
| MSTRG. 224440. 1 |              | XLOC_230931 | 220 coding  | noncoding | noncoding | noncoding |
| MSTRG. 224452. 1 | ASB9         | XLOC_230969 | 233 coding  | noncoding | noncoding | noncoding |

|                  |           |             |              |           |           |           |
|------------------|-----------|-------------|--------------|-----------|-----------|-----------|
| MSTRG. 224454. 1 | ASB9      | XLOC_230970 | 280 coding   | noncoding | noncoding | noncoding |
| NM_001721. 7     | BMX       | XLOC_230975 | 2511 coding  | coding    | coding    | coding    |
| MSTRG. 224576. 1 |           | XLOC_231006 | 296 coding   | noncoding | noncoding | noncoding |
| MSTRG. 224645. 1 |           | XLOC_231031 | 295 coding   | noncoding | noncoding | noncoding |
| MSTRG. 224691. 1 | REPS2     | XLOC_231036 | 342 coding   | noncoding | noncoding | noncoding |
| MSTRG. 224692. 1 | REPS2     | XLOC_231037 | 392 coding   | noncoding | noncoding | noncoding |
| MSTRG. 224713. 1 | REPS2     | XLOC_231054 | 263 coding   | noncoding | noncoding | noncoding |
| MSTRG. 224654. 1 |           | XLOC_231065 | 212 coding   | noncoding | noncoding | noncoding |
| MSTRG. 224678. 1 |           | XLOC_231108 | 270 coding   | noncoding | noncoding | noncoding |
| MSTRG. 224733. 1 |           | XLOC_231112 | 289 coding   | noncoding | noncoding | noncoding |
| MSTRG. 224745. 1 |           | XLOC_231118 | 260 coding   | noncoding | noncoding | noncoding |
| MSTRG. 224797. 1 | CDKL5     | XLOC_231120 | 244 coding   | noncoding | noncoding | noncoding |
| MSTRG. 224858. 1 | ADGRG2    | XLOC_231131 | 236 coding   | noncoding | noncoding | noncoding |
| MSTRG. 224806. 1 |           | XLOC_231133 | 273 coding   | noncoding | noncoding | noncoding |
| MSTRG. 224807. 1 |           | XLOC_231135 | 251 coding   | noncoding | noncoding | noncoding |
| MSTRG. 224929. 3 | RPS6KA3   | XLOC_231167 | 7277 coding  | coding    | coding    | noncoding |
| MSTRG. 224897. 1 |           | XLOC_231168 | 299 coding   | noncoding | noncoding | noncoding |
| MSTRG. 224970. 1 | MBTPS2    | XLOC_231199 | 277 coding   | noncoding | noncoding | noncoding |
| MSTRG. 224977. 1 |           | XLOC_231202 | 264 coding   | noncoding | noncoding | noncoding |
| NM_001258423. 1  | SMS       | XLOC_231203 | 1680 coding  | coding    | coding    | coding    |
| MSTRG. 225133. 1 | PHEX      | XLOC_231207 | 284 coding   | noncoding | noncoding | noncoding |
| MSTRG. 225152. 1 | PTCHD1-AS | XLOC_231213 | 241 coding   | noncoding | noncoding | noncoding |
| MSTRG. 225168. 1 | PTCHD1-AS | XLOC_231222 | 314 coding   | noncoding | noncoding | noncoding |
| MSTRG. 225170. 1 | PTCHD1-AS | XLOC_231223 | 209 coding   | noncoding | noncoding | noncoding |
| XM_011545449. 3  | PTCHD1    | XLOC_231236 | 12950 coding | coding    | coding    | coding    |
| MSTRG. 225125. 1 |           | XLOC_231240 | 313 coding   | noncoding | noncoding | noncoding |
| MSTRG. 225130. 1 |           | XLOC_231242 | 230 coding   | coding    | noncoding | noncoding |
| MSTRG. 225202. 4 | SAT1      | XLOC_231250 | 1459 coding  | noncoding | noncoding | coding    |
| XM_017029797. 2  | ZFX       | XLOC_231264 | 7787 coding  | coding    | coding    | coding    |
| NM_001178084. 2  | ZFX       | XLOC_231264 | 7391 coding  | coding    | coding    | coding    |
| MSTRG. 225242. 1 |           | XLOC_231277 | 680 coding   | coding    | noncoding | coding    |
| MSTRG. 225397. 1 | POLA1     | XLOC_231298 | 301 coding   | noncoding | noncoding | noncoding |
| MSTRG. 225281. 1 |           | XLOC_231306 | 279 coding   | noncoding | noncoding | noncoding |
| MSTRG. 225299. 1 |           | XLOC_231317 | 283 coding   | noncoding | noncoding | noncoding |
| MSTRG. 225329. 1 |           | XLOC_231331 | 259 coding   | noncoding | noncoding | noncoding |
| MSTRG. 225373. 1 |           | XLOC_231352 | 228 coding   | noncoding | noncoding | noncoding |
| XM_017029241. 1  | IL1RAPL1  | XLOC_231358 | 6886 coding  | coding    | coding    | coding    |
| MSTRG. 225427. 1 | IL1RAPL1  | XLOC_231360 | 290 coding   | coding    | noncoding | noncoding |
| MSTRG. 225429. 1 | IL1RAPL1  | XLOC_231361 | 264 coding   | noncoding | noncoding | noncoding |
| MSTRG. 225450. 1 | IL1RAPL1  | XLOC_231372 | 267 coding   | noncoding | noncoding | noncoding |
| MSTRG. 225453. 1 | IL1RAPL1  | XLOC_231375 | 297 coding   | noncoding | noncoding | noncoding |
| MSTRG. 225461. 1 | IL1RAPL1  | XLOC_231378 | 272 coding   | noncoding | noncoding | noncoding |
| MSTRG. 225384. 1 |           | XLOC_231383 | 317 coding   | noncoding | noncoding | noncoding |

|                  |              |             |             |           |           |           |
|------------------|--------------|-------------|-------------|-----------|-----------|-----------|
| MSTRG. 225405. 1 |              | XLOC_231387 | 732 coding  | noncoding | noncoding | noncoding |
| MSTRG. 225406. 1 |              | XLOC_231394 | 252 coding  | noncoding | noncoding | noncoding |
| MSTRG. 225402. 1 |              | XLOC_231395 | 283 coding  | noncoding | noncoding | noncoding |
| MSTRG. 225509. 1 |              | XLOC_231429 | 409 coding  | noncoding | noncoding | noncoding |
| NM_001205019. 1  | GK           | XLOC_231431 | 4579 coding | coding    | coding    | coding    |
| XM_006724485. 2  | GK           | XLOC_231431 | 3570 coding | coding    | coding    | coding    |
| MSTRG. 225689. 1 | DMD          | XLOC_231462 | 226 coding  | noncoding | noncoding | noncoding |
| MSTRG. 225692. 1 | DMD          | XLOC_231464 | 359 coding  | coding    | noncoding | noncoding |
| MSTRG. 225703. 1 | DMD          | XLOC_231470 | 244 coding  | noncoding | noncoding | noncoding |
| MSTRG. 225739. 1 | DMD          | XLOC_231484 | 267 coding  | coding    | noncoding | noncoding |
| MSTRG. 225753. 1 | DMD          | XLOC_231490 | 264 coding  | noncoding | noncoding | noncoding |
| MSTRG. 225570. 1 |              | XLOC_231497 | 339 coding  | noncoding | noncoding | noncoding |
| MSTRG. 225573. 1 |              | XLOC_231498 | 301 coding  | noncoding | noncoding | noncoding |
| XR_950542. 3     | LOC105373153 | XLOC_231499 | 2436 coding | noncoding | noncoding | noncoding |
| MSTRG. 225581. 1 | LOC105373153 | XLOC_231502 | 316 coding  | noncoding | noncoding | noncoding |
| MSTRG. 225589. 1 |              | XLOC_231506 | 252 coding  | noncoding | noncoding | noncoding |
| MSTRG. 225595. 1 |              | XLOC_231512 | 336 coding  | noncoding | noncoding | noncoding |
| MSTRG. 225601. 1 |              | XLOC_231516 | 270 coding  | noncoding | noncoding | noncoding |
| MSTRG. 225612. 1 |              | XLOC_231523 | 449 coding  | noncoding | noncoding | noncoding |
| MSTRG. 225615. 1 |              | XLOC_231526 | 292 coding  | noncoding | noncoding | noncoding |
| MSTRG. 225616. 1 |              | XLOC_231527 | 325 coding  | noncoding | noncoding | noncoding |
| MSTRG. 225665. 1 | CFAP47       | XLOC_231545 | 248 coding  | noncoding | noncoding | noncoding |
| MSTRG. 225669. 1 | CFAP47       | XLOC_231547 | 265 coding  | noncoding | noncoding | noncoding |
| MSTRG. 225672. 1 |              | XLOC_231559 | 546 coding  | noncoding | noncoding | noncoding |
| MSTRG. 225675. 1 |              | XLOC_231560 | 296 coding  | noncoding | noncoding | noncoding |
| MSTRG. 225683. 1 |              | XLOC_231563 | 250 coding  | noncoding | noncoding | noncoding |
| MSTRG. 225685. 1 |              | XLOC_231564 | 288 coding  | noncoding | noncoding | noncoding |
| MSTRG. 225765. 1 | PRRG1        | XLOC_231568 | 295 coding  | noncoding | noncoding | noncoding |
| MSTRG. 225780. 1 |              | XLOC_231572 | 289 coding  | noncoding | noncoding | noncoding |
| MSTRG. 225775. 1 |              | XLOC_231575 | 253 coding  | coding    | coding    | noncoding |
| MSTRG. 225829. 1 |              | XLOC_231611 | 237 coding  | coding    | noncoding | noncoding |
| MSTRG. 225833. 1 |              | XLOC_231617 | 312 coding  | noncoding | noncoding | noncoding |
| MSTRG. 225843. 1 | LOC105373174 | XLOC_231618 | 257 coding  | noncoding | noncoding | noncoding |
| MSTRG. 225901. 1 |              | XLOC_231628 | 268 coding  | coding    | noncoding | noncoding |
| MSTRG. 225982. 1 |              | XLOC_231634 | 263 coding  | noncoding | noncoding | noncoding |
| MSTRG. 225930. 1 | LINC01282    | XLOC_231679 | 305 coding  | noncoding | noncoding | noncoding |
| MSTRG. 226033. 1 |              | XLOC_231718 | 236 coding  | noncoding | noncoding | noncoding |
| MSTRG. 226035. 1 |              | XLOC_231719 | 239 coding  | noncoding | noncoding | noncoding |
| MSTRG. 226041. 1 | LOC105373182 | XLOC_231724 | 312 coding  | noncoding | noncoding | noncoding |
| MSTRG. 226075. 1 |              | XLOC_231735 | 312 coding  | coding    | noncoding | noncoding |
| MSTRG. 226080. 1 |              | XLOC_231738 | 258 coding  | noncoding | noncoding | noncoding |
| MSTRG. 226087. 1 |              | XLOC_231743 | 282 coding  | noncoding | noncoding | noncoding |
| MSTRG. 226106. 1 |              | XLOC_231769 | 246 coding  | noncoding | noncoding | noncoding |

|                  |           |             |              |           |           |           |
|------------------|-----------|-------------|--------------|-----------|-----------|-----------|
| MSTRG. 226110. 1 |           | XLOC_231778 | 206 coding   | noncoding | noncoding | noncoding |
| MSTRG. 226237. 1 |           | XLOC_231828 | 304 coding   | noncoding | noncoding | noncoding |
| MSTRG. 226240. 1 |           | XLOC_231831 | 422 coding   | noncoding | noncoding | noncoding |
| MSTRG. 226252. 1 | MAOB      | XLOC_231834 | 271 coding   | noncoding | noncoding | noncoding |
| MSTRG. 226267. 1 |           | XLOC_231843 | 293 coding   | noncoding | noncoding | noncoding |
| MSTRG. 226274. 1 |           | XLOC_231845 | 291 coding   | noncoding | noncoding | noncoding |
| MSTRG. 226276. 1 |           | XLOC_231847 | 247 coding   | noncoding | noncoding | noncoding |
| MSTRG. 226268. 1 |           | XLOC_231849 | 223 coding   | noncoding | noncoding | noncoding |
| MSTRG. 226295. 1 |           | XLOC_231855 | 259 coding   | noncoding | noncoding | noncoding |
| MSTRG. 226433. 1 | KDM6A     | XLOC_231863 | 386 coding   | noncoding | noncoding | noncoding |
| MSTRG. 226441. 1 | KDM6A     | XLOC_231868 | 381 coding   | noncoding | noncoding | noncoding |
| MSTRG. 226371. 1 |           | XLOC_231908 | 222 coding   | noncoding | noncoding | noncoding |
| MSTRG. 226417. 1 |           | XLOC_231915 | 275 coding   | noncoding | noncoding | noncoding |
| MSTRG. 226518. 1 |           | XLOC_231952 | 303 coding   | noncoding | noncoding | noncoding |
| MSTRG. 226527. 1 |           | XLOC_231956 | 279 coding   | noncoding | noncoding | noncoding |
| MSTRG. 226530. 1 |           | XLOC_231957 | 209 coding   | noncoding | noncoding | noncoding |
| MSTRG. 226550. 1 | RP2       | XLOC_231982 | 229 coding   | noncoding | noncoding | noncoding |
| MSTRG. 226569. 1 | JADE3     | XLOC_231985 | 282 coding   | noncoding | noncoding | noncoding |
| MSTRG. 226578. 1 | RGN       | XLOC_231988 | 284 coding   | noncoding | noncoding | noncoding |
| MSTRG. 226658. 1 | UBA1      | XLOC_231994 | 286 coding   | noncoding | noncoding | noncoding |
| MSTRG. 226662. 4 | USP11     | XLOC_231997 | 268 coding   | coding    | noncoding | noncoding |
| MSTRG. 226593. 1 |           | XLOC_231998 | 231 coding   | noncoding | noncoding | noncoding |
| MSTRG. 226586. 1 |           | XLOC_231999 | 298 coding   | noncoding | noncoding | noncoding |
| MSTRG. 226591. 1 |           | XLOC_232000 | 313 coding   | noncoding | noncoding | noncoding |
| MSTRG. 226597. 1 |           | XLOC_232002 | 274 coding   | noncoding | noncoding | noncoding |
| MSTRG. 226607. 1 |           | XLOC_232007 | 268 coding   | noncoding | noncoding | noncoding |
| MSTRG. 226649. 1 |           | XLOC_232009 | 256 coding   | noncoding | noncoding | noncoding |
| MSTRG. 226680. 4 | UXT-AS1   | XLOC_232018 | 549 coding   | coding    | noncoding | noncoding |
| MSTRG. 226680. 3 | UXT-AS1   | XLOC_232018 | 727 coding   | coding    | noncoding | noncoding |
| MSTRG. 226674. 1 | CXXC1P1   | XLOC_232020 | 205 coding   | noncoding | noncoding | noncoding |
| MSTRG. 226684. 1 |           | XLOC_232024 | 318 coding   | coding    | noncoding | noncoding |
| XM_011543900. 2  | ZNF81     | XLOC_232025 | 11348 coding | coding    | coding    | coding    |
| MSTRG. 226734. 1 |           | XLOC_232052 | 264 coding   | noncoding | noncoding | noncoding |
| MSTRG. 226745. 5 | SLC38A5   | XLOC_232059 | 1785 coding  | coding    | coding    | coding    |
| NM_001282157. 1  | FTSJ1     | XLOC_232060 | 1669 coding  | coding    | coding    | coding    |
| XR_949015. 2     | FTSJ1     | XLOC_232060 | 2024 coding  | coding    | coding    | coding    |
| MSTRG. 226764. 1 |           | XLOC_232071 | 297 coding   | noncoding | noncoding | noncoding |
| MSTRG. 226766. 1 |           | XLOC_232072 | 309 coding   | noncoding | noncoding | noncoding |
| MSTRG. 226813. 1 | KCND1     | XLOC_232108 | 266 coding   | noncoding | noncoding | noncoding |
| MSTRG. 226836. 1 | TFE3      | XLOC_232113 | 3417 coding  | coding    | coding    | noncoding |
| MSTRG. 226893. 1 |           | XLOC_232153 | 361 coding   | noncoding | noncoding | noncoding |
| MSTRG. 226948. 1 |           | XLOC_232198 | 316 coding   | noncoding | noncoding | noncoding |
| MSTRG. 227076. 1 | LINC01284 | XLOC_232202 | 234 coding   | noncoding | noncoding | noncoding |

|                  |         |             |              |           |           |           |
|------------------|---------|-------------|--------------|-----------|-----------|-----------|
| MSTRG. 227003. 1 |         | XLOC_232271 | 354 coding   | noncoding | noncoding | noncoding |
| MSTRG. 227013. 1 |         | XLOC_232286 | 243 coding   | noncoding | noncoding | noncoding |
| MSTRG. 227017. 1 |         | XLOC_232287 | 289 coding   | noncoding | noncoding | noncoding |
| NM_001272061. 1  | MAGED4  | XLOC_232290 | 2671 coding  | coding    | coding    | coding    |
| XM_011530836. 2  | XAGE2   | XLOC_232295 | 669 coding   | coding    | noncoding | coding    |
| MSTRG. 227040. 1 |         | XLOC_232303 | 240 coding   | noncoding | noncoding | noncoding |
| MSTRG. 227044. 1 |         | XLOC_232307 | 311 coding   | noncoding | noncoding | noncoding |
| MSTRG. 227049. 1 |         | XLOC_232311 | 274 coding   | coding    | noncoding | noncoding |
| MSTRG. 227230. 1 | IQSEC2  | XLOC_232350 | 299 coding   | noncoding | noncoding | noncoding |
| MSTRG. 227184. 1 |         | XLOC_232359 | 360 coding   | noncoding | noncoding | noncoding |
| MSTRG. 227340. 2 | HUWE1   | XLOC_232361 | 14845 coding | coding    | coding    | coding    |
| MSTRG. 227235. 1 |         | XLOC_232369 | 219 coding   | noncoding | noncoding | noncoding |
| MSTRG. 227248. 1 | FAM120C | XLOC_232381 | 269 coding   | noncoding | noncoding | noncoding |
| MSTRG. 227267. 1 | WNK3    | XLOC_232389 | 210 coding   | noncoding | noncoding | noncoding |
| MSTRG. 227272. 1 | WNK3    | XLOC_232392 | 289 coding   | noncoding | noncoding | noncoding |
| MSTRG. 227273. 1 | WNK3    | XLOC_232393 | 289 coding   | noncoding | noncoding | noncoding |
| MSTRG. 227292. 1 |         | XLOC_232406 | 273 coding   | noncoding | noncoding | noncoding |
| MSTRG. 227299. 1 |         | XLOC_232410 | 298 coding   | coding    | noncoding | noncoding |
| MSTRG. 227301. 1 |         | XLOC_232411 | 280 coding   | noncoding | noncoding | noncoding |
| MSTRG. 227305. 1 |         | XLOC_232414 | 228 coding   | noncoding | noncoding | noncoding |
| MSTRG. 227373. 1 | PAGE2   | XLOC_232426 | 267 coding   | coding    | noncoding | noncoding |
| MSTRG. 227354. 1 |         | XLOC_232434 | 269 coding   | noncoding | noncoding | noncoding |
| MSTRG. 227397. 1 |         | XLOC_232442 | 260 coding   | noncoding | noncoding | noncoding |
| MSTRG. 227612. 1 | KLF8    | XLOC_232459 | 229 coding   | coding    | noncoding | noncoding |
| MSTRG. 227490. 1 |         | XLOC_232480 | 300 coding   | noncoding | noncoding | noncoding |
| MSTRG. 227453. 1 | NBDY    | XLOC_232504 | 237 coding   | noncoding | noncoding | noncoding |
| MSTRG. 227803. 1 | FAAH2   | XLOC_232542 | 250 coding   | coding    | noncoding | noncoding |
| MSTRG. 227858. 1 | FAAH2   | XLOC_232552 | 288 coding   | noncoding | noncoding | noncoding |
| MSTRG. 227871. 1 | FAAH2   | XLOC_232555 | 281 coding   | noncoding | noncoding | noncoding |
| MSTRG. 227873. 1 | FAAH2   | XLOC_232557 | 218 coding   | noncoding | noncoding | noncoding |
| MSTRG. 227548. 1 |         | XLOC_232570 | 308 coding   | noncoding | noncoding | noncoding |
| MSTRG. 227550. 1 |         | XLOC_232572 | 272 coding   | noncoding | noncoding | noncoding |
| MSTRG. 227558. 1 |         | XLOC_232578 | 216 coding   | noncoding | noncoding | noncoding |
| MSTRG. 227704. 1 |         | XLOC_232603 | 269 coding   | coding    | noncoding | noncoding |
| MSTRG. 227705. 1 |         | XLOC_232604 | 220 coding   | noncoding | noncoding | noncoding |
| MSTRG. 227710. 1 |         | XLOC_232606 | 270 coding   | noncoding | noncoding | noncoding |
| MSTRG. 227716. 1 |         | XLOC_232608 | 267 coding   | noncoding | noncoding | noncoding |
| MSTRG. 227764. 1 |         | XLOC_232654 | 285 coding   | noncoding | noncoding | noncoding |
| MSTRG. 227767. 1 |         | XLOC_232656 | 276 coding   | noncoding | noncoding | noncoding |
| MSTRG. 227944. 1 |         | XLOC_232708 | 314 coding   | noncoding | noncoding | noncoding |
| MSTRG. 227948. 1 |         | XLOC_232710 | 292 coding   | noncoding | noncoding | noncoding |
| MSTRG. 227950. 1 |         | XLOC_232711 | 229 coding   | noncoding | noncoding | noncoding |
| MSTRG. 227953. 1 |         | XLOC_232713 | 271 coding   | noncoding | noncoding | noncoding |

|                  |              |             |              |           |           |           |
|------------------|--------------|-------------|--------------|-----------|-----------|-----------|
| MSTRG. 227955. 1 |              | XLOC_232714 | 274 coding   | noncoding | noncoding | noncoding |
| MSTRG. 228484. 1 | ZC3H12B      | XLOC_232727 | 249 coding   | noncoding | noncoding | noncoding |
| MSTRG. 228495. 1 | ZC3H12B      | XLOC_232738 | 305 coding   | noncoding | noncoding | noncoding |
| MSTRG. 228583. 1 | ZC3H12B      | XLOC_232756 | 281 coding   | noncoding | noncoding | noncoding |
| MSTRG. 228586. 1 | ZC3H12B      | XLOC_232757 | 255 coding   | noncoding | noncoding | noncoding |
| MSTRG. 228010. 1 |              | XLOC_232768 | 308 coding   | noncoding | noncoding | noncoding |
| MSTRG. 228012. 1 |              | XLOC_232769 | 217 coding   | noncoding | noncoding | noncoding |
| MSTRG. 228177. 1 |              | XLOC_232777 | 254 coding   | noncoding | noncoding | noncoding |
| MSTRG. 228185. 1 |              | XLOC_232785 | 400 coding   | noncoding | noncoding | noncoding |
| MSTRG. 228198. 1 |              | XLOC_232798 | 237 coding   | noncoding | noncoding | noncoding |
| MSTRG. 228235. 1 |              | XLOC_232807 | 274 coding   | noncoding | noncoding | noncoding |
| MSTRG. 228041. 1 |              | XLOC_232810 | 290 coding   | noncoding | noncoding | noncoding |
| MSTRG. 228043. 1 |              | XLOC_232811 | 391 coding   | noncoding | noncoding | noncoding |
| MSTRG. 228044. 1 |              | XLOC_232812 | 291 coding   | noncoding | noncoding | noncoding |
| MSTRG. 228064. 1 | LOC105373240 | XLOC_232822 | 227 coding   | noncoding | noncoding | noncoding |
| MSTRG. 228059. 1 |              | XLOC_232823 | 353 coding   | noncoding | noncoding | noncoding |
| MSTRG. 228067. 1 |              | XLOC_232828 | 216 coding   | coding    | noncoding | noncoding |
| MSTRG. 228070. 1 |              | XLOC_232830 | 320 coding   | coding    | noncoding | noncoding |
| MSTRG. 228079. 1 |              | XLOC_232835 | 299 coding   | coding    | noncoding | noncoding |
| MSTRG. 228082. 1 |              | XLOC_232836 | 325 coding   | noncoding | noncoding | noncoding |
| NM_000044. 6     | AR           | XLOC_232837 | 10667 coding | coding    | coding    | coding    |
| MSTRG. 228085. 1 |              | XLOC_232842 | 252 coding   | noncoding | noncoding | noncoding |
| MSTRG. 228123. 1 | OPHN1        | XLOC_232861 | 254 coding   | noncoding | noncoding | noncoding |
| MSTRG. 228125. 1 | OPHN1        | XLOC_232863 | 223 coding   | noncoding | noncoding | noncoding |
| MSTRG. 228128. 1 | OPHN1        | XLOC_232865 | 218 coding   | noncoding | noncoding | noncoding |
| XM_017029451. 2  | YIPF6        | XLOC_232872 | 2644 coding  | coding    | noncoding | coding    |
| NM_001142503. 2  | STARD8       | XLOC_232881 | 4946 coding  | coding    | coding    | coding    |
| MSTRG. 228277. 1 |              | XLOC_232901 | 517 coding   | noncoding | noncoding | noncoding |
| MSTRG. 228392. 1 | EDA          | XLOC_232918 | 259 coding   | noncoding | noncoding | noncoding |
| MSTRG. 228432. 1 | TEX11        | XLOC_232946 | 209 coding   | noncoding | noncoding | noncoding |
| MSTRG. 228442. 1 | TEX11        | XLOC_232950 | 253 coding   | noncoding | noncoding | noncoding |
| MSTRG. 228415. 1 |              | XLOC_232952 | 301 coding   | noncoding | noncoding | noncoding |
| NM_001170931. 2  | FOXO4        | XLOC_232965 | 3479 coding  | coding    | coding    | coding    |
| NM_000166. 6     | GJB1         | XLOC_232982 | 1937 coding  | coding    | coding    | coding    |
| MSTRG. 228604. 1 |              | XLOC_232990 | 275 coding   | noncoding | noncoding | noncoding |
| MSTRG. 228647. 1 | TAF1         | XLOC_232996 | 259 coding   | noncoding | noncoding | noncoding |
| MSTRG. 228652. 1 | TAF1         | XLOC_232997 | 407 coding   | noncoding | noncoding | noncoding |
| NM_181672. 3     | OGT          | XLOC_232998 | 5435 coding  | coding    | coding    | coding    |
| MSTRG. 228658. 1 |              | XLOC_233001 | 206 coding   | noncoding | noncoding | noncoding |
| MSTRG. 228694. 1 |              | XLOC_233016 | 311 coding   | coding    | coding    | noncoding |
| MSTRG. 228695. 1 |              | XLOC_233017 | 275 coding   | noncoding | noncoding | noncoding |
| MSTRG. 228663. 1 |              | XLOC_233018 | 215 coding   | noncoding | noncoding | noncoding |
| XM_017029476. 1  | NHSL2        | XLOC_233019 | 12654 coding | coding    | coding    | coding    |

|                   |              |             |             |           |           |           |
|-------------------|--------------|-------------|-------------|-----------|-----------|-----------|
| MSTRG. 228746. 1  | PHKA1        | XLOC_233051 | 220 coding  | noncoding | noncoding | noncoding |
| MSTRG. 228759. 1  |              | XLOC_233059 | 286 coding  | noncoding | noncoding | noncoding |
| MSTRG. 228780. 1  |              | XLOC_233069 | 284 coding  | noncoding | noncoding | noncoding |
| MSTRG. 228782. 1  |              | XLOC_233071 | 227 coding  | noncoding | noncoding | noncoding |
| MSTRG. 228839. 1  | CHIC1        | XLOC_233087 | 525 coding  | noncoding | noncoding | noncoding |
| MSTRG. 228845. 1  | CHIC1        | XLOC_233093 | 281 coding  | noncoding | noncoding | noncoding |
| MSTRG. 228787. 1  |              | XLOC_233096 | 229 coding  | noncoding | noncoding | noncoding |
| MSTRG. 228792. 1  |              | XLOC_233098 | 237 coding  | noncoding | noncoding | noncoding |
| MSTRG. 228796. 1  |              | XLOC_233101 | 286 coding  | noncoding | noncoding | noncoding |
| MSTRG. 228801. 1  |              | XLOC_233104 | 324 coding  | noncoding | noncoding | noncoding |
| MSTRG. 228989. 1  | JPX          | XLOC_233107 | 288 coding  | noncoding | noncoding | noncoding |
| MSTRG. 229002. 1  | JPX          | XLOC_233120 | 251 coding  | noncoding | noncoding | noncoding |
| MSTRG. 229077. 10 | FTX          | XLOC_233176 | 3115 coding | noncoding | coding    | noncoding |
| MSTRG. 229077. 15 | FTX          | XLOC_233176 | 1757 coding | noncoding | noncoding | noncoding |
| MSTRG. 229215. 1  | UPRT         | XLOC_233222 | 336 coding  | noncoding | noncoding | noncoding |
| MSTRG. 229247. 1  | ZDHC15       | XLOC_233231 | 305 coding  | noncoding | noncoding | noncoding |
| MSTRG. 229272. 1  | LOC107985664 | XLOC_233239 | 232 coding  | noncoding | noncoding | noncoding |
| MSTRG. 229281. 1  | LOC107985664 | XLOC_233244 | 235 coding  | noncoding | noncoding | noncoding |
| MSTRG. 228929. 1  |              | XLOC_233261 | 445 coding  | noncoding | noncoding | noncoding |
| MSTRG. 228956. 1  |              | XLOC_233271 | 269 coding  | noncoding | noncoding | noncoding |
| MSTRG. 228966. 1  | MIR325HG     | XLOC_233273 | 223 coding  | noncoding | noncoding | noncoding |
| MSTRG. 228967. 1  | MIR325HG     | XLOC_233274 | 748 coding  | coding    | noncoding | noncoding |
| MSTRG. 228957. 1  |              | XLOC_233277 | 264 coding  | coding    | noncoding | noncoding |
| MSTRG. 228959. 1  |              | XLOC_233279 | 332 coding  | noncoding | noncoding | noncoding |
| MSTRG. 228960. 1  |              | XLOC_233280 | 247 coding  | noncoding | noncoding | noncoding |
| MSTRG. 228961. 1  |              | XLOC_233281 | 226 coding  | noncoding | noncoding | noncoding |
| MSTRG. 228978. 1  |              | XLOC_233284 | 216 coding  | noncoding | noncoding | noncoding |
| MSTRG. 229145. 4  | ATP7A        | XLOC_233297 | 211 coding  | coding    | noncoding | noncoding |
| MSTRG. 229145. 5  | ATP7A        | XLOC_233297 | 637 coding  | coding    | coding    | noncoding |
| MSTRG. 229148. 1  | ATP7A        | XLOC_233299 | 240 coding  | noncoding | noncoding | noncoding |
| MSTRG. 229142. 1  |              | XLOC_233308 | 295 coding  | noncoding | noncoding | noncoding |
| MSTRG. 229179. 1  |              | XLOC_233322 | 376 coding  | noncoding | noncoding | noncoding |
| MSTRG. 229301. 1  | LOC107985670 | XLOC_233327 | 402 coding  | noncoding | noncoding | noncoding |
| MSTRG. 229302. 1  |              | XLOC_233328 | 254 coding  | noncoding | noncoding | noncoding |
| MSTRG. 229292. 1  |              | XLOC_233334 | 224 coding  | noncoding | noncoding | noncoding |
| MSTRG. 229318. 1  |              | XLOC_233341 | 274 coding  | coding    | noncoding | noncoding |
| MSTRG. 229325. 1  |              | XLOC_233345 | 287 coding  | noncoding | noncoding | noncoding |
| MSTRG. 229326. 1  |              | XLOC_233346 | 261 coding  | noncoding | noncoding | noncoding |
| MSTRG. 229454. 1  |              | XLOC_233388 | 225 coding  | noncoding | noncoding | noncoding |
| MSTRG. 229375. 1  | TENT5D       | XLOC_233409 | 244 coding  | noncoding | noncoding | noncoding |
| MSTRG. 229402. 1  |              | XLOC_233422 | 236 coding  | noncoding | noncoding | noncoding |
| MSTRG. 229403. 1  |              | XLOC_233423 | 363 coding  | noncoding | noncoding | noncoding |
| MSTRG. 229511. 1  |              | XLOC_233478 | 255 coding  | noncoding | noncoding | noncoding |

|                  |              |             |             |           |           |           |
|------------------|--------------|-------------|-------------|-----------|-----------|-----------|
| MSTRG. 229531. 1 |              | XLOC_233486 | 299 coding  | noncoding | noncoding | noncoding |
| MSTRG. 229533. 1 |              | XLOC_233487 | 516 coding  | noncoding | noncoding | noncoding |
| XR_938457. 2     | LOC105373288 | XLOC_233489 | 1431 coding | noncoding | noncoding | noncoding |
| MSTRG. 229541. 1 |              | XLOC_233490 | 306 coding  | coding    | noncoding | noncoding |
| MSTRG. 229560. 1 |              | XLOC_233505 | 301 coding  | noncoding | noncoding | noncoding |
| MSTRG. 229562. 1 |              | XLOC_233506 | 261 coding  | coding    | noncoding | noncoding |
| MSTRG. 229569. 1 |              | XLOC_233512 | 293 coding  | noncoding | noncoding | noncoding |
| MSTRG. 229644. 1 |              | XLOC_233542 | 299 coding  | noncoding | noncoding | noncoding |
| MSTRG. 229652. 1 |              | XLOC_233545 | 280 coding  | noncoding | noncoding | noncoding |
| MSTRG. 229655. 1 |              | XLOC_233547 | 272 coding  | noncoding | noncoding | noncoding |
| MSTRG. 229657. 1 |              | XLOC_233549 | 307 coding  | noncoding | noncoding | noncoding |
| MSTRG. 229658. 1 |              | XLOC_233550 | 288 coding  | noncoding | noncoding | noncoding |
| MSTRG. 229686. 1 |              | XLOC_233568 | 249 coding  | noncoding | noncoding | noncoding |
| MSTRG. 229693. 1 |              | XLOC_233569 | 306 coding  | noncoding | noncoding | noncoding |
| MSTRG. 229705. 1 |              | XLOC_233574 | 262 coding  | coding    | noncoding | noncoding |
| MSTRG. 229709. 1 |              | XLOC_233577 | 312 coding  | noncoding | noncoding | noncoding |
| MSTRG. 229711. 1 |              | XLOC_233579 | 222 coding  | noncoding | noncoding | noncoding |
| MSTRG. 229741. 1 |              | XLOC_233591 | 265 coding  | noncoding | noncoding | noncoding |
| XM_011530847. 3  | DACH2        | XLOC_233592 | 6787 coding | coding    | coding    | coding    |
| MSTRG. 229763. 1 | DACH2        | XLOC_233595 | 239 coding  | noncoding | noncoding | noncoding |
| MSTRG. 229779. 1 | DACH2        | XLOC_233599 | 303 coding  | noncoding | noncoding | noncoding |
| MSTRG. 229756. 1 |              | XLOC_233604 | 344 coding  | noncoding | noncoding | noncoding |
| NM_019117. 5     | KLHL4        | XLOC_233608 | 5765 coding | coding    | coding    | coding    |
| MSTRG. 229791. 1 |              | XLOC_233610 | 238 coding  | noncoding | noncoding | noncoding |
| MSTRG. 229809. 1 |              | XLOC_233612 | 229 coding  | noncoding | noncoding | noncoding |
| MSTRG. 229814. 1 |              | XLOC_233615 | 309 coding  | noncoding | noncoding | noncoding |
| MSTRG. 229820. 1 |              | XLOC_233619 | 316 coding  | noncoding | coding    | noncoding |
| MSTRG. 229826. 1 |              | XLOC_233622 | 304 coding  | noncoding | noncoding | noncoding |
| MSTRG. 229827. 1 |              | XLOC_233623 | 342 coding  | noncoding | noncoding | noncoding |
| MSTRG. 229831. 1 | LOC107985713 | XLOC_233624 | 262 coding  | noncoding | noncoding | noncoding |
| MSTRG. 229833. 1 | LOC107985713 | XLOC_233625 | 258 coding  | noncoding | noncoding | noncoding |
| MSTRG. 229904. 1 |              | XLOC_233649 | 363 coding  | noncoding | noncoding | noncoding |
| MSTRG. 229927. 1 |              | XLOC_233657 | 284 coding  | coding    | noncoding | noncoding |
| MSTRG. 229934. 1 |              | XLOC_233663 | 256 coding  | noncoding | noncoding | noncoding |
| MSTRG. 229944. 1 |              | XLOC_233668 | 302 coding  | noncoding | noncoding | noncoding |
| MSTRG. 229954. 1 |              | XLOC_233670 | 263 coding  | noncoding | noncoding | noncoding |
| MSTRG. 229991. 1 | PCDH11X      | XLOC_233674 | 341 coding  | noncoding | noncoding | noncoding |
| MSTRG. 230009. 1 | PCDH11X      | XLOC_233680 | 228 coding  | noncoding | noncoding | noncoding |
| MSTRG. 229966. 1 |              | XLOC_233687 | 287 coding  | coding    | noncoding | noncoding |
| MSTRG. 229967. 1 |              | XLOC_233688 | 217 coding  | noncoding | noncoding | noncoding |
| MSTRG. 229973. 1 |              | XLOC_233692 | 311 coding  | noncoding | noncoding | noncoding |
| MSTRG. 230021. 1 |              | XLOC_233698 | 244 coding  | noncoding | noncoding | noncoding |
| MSTRG. 230019. 1 |              | XLOC_233700 | 242 coding  | noncoding | noncoding | noncoding |

|                  |              |             |             |           |           |           |
|------------------|--------------|-------------|-------------|-----------|-----------|-----------|
| MSTRG. 230023. 1 |              | XLOC_233703 | 240 coding  | noncoding | noncoding | noncoding |
| XM_017029454. 1  | FAM133A      | XLOC_233706 | 6011 coding | noncoding | noncoding | coding    |
| MSTRG. 230027. 1 |              | XLOC_233707 | 281 coding  | noncoding | noncoding | noncoding |
| MSTRG. 230035. 1 |              | XLOC_233709 | 258 coding  | noncoding | noncoding | noncoding |
| MSTRG. 230032. 1 |              | XLOC_233710 | 316 coding  | coding    | noncoding | noncoding |
| MSTRG. 230043. 1 |              | XLOC_233715 | 225 coding  | coding    | noncoding | noncoding |
| MSTRG. 230059. 1 |              | XLOC_233722 | 282 coding  | coding    | noncoding | noncoding |
| MSTRG. 230064. 1 | LOC107985710 | XLOC_233724 | 312 coding  | noncoding | noncoding | noncoding |
| MSTRG. 230061. 1 | LOC107985710 | XLOC_233727 | 318 coding  | noncoding | noncoding | noncoding |
| MSTRG. 230070. 1 |              | XLOC_233730 | 261 coding  | noncoding | noncoding | noncoding |
| MSTRG. 230079. 1 |              | XLOC_233734 | 282 coding  | noncoding | noncoding | noncoding |
| MSTRG. 230078. 1 |              | XLOC_233735 | 263 coding  | coding    | noncoding | noncoding |
| MSTRG. 230093. 1 |              | XLOC_233742 | 302 coding  | noncoding | noncoding | noncoding |
| MSTRG. 230101. 1 |              | XLOC_233747 | 451 coding  | noncoding | noncoding | noncoding |
| MSTRG. 230481. 1 | DIAPH2       | XLOC_233767 | 254 coding  | noncoding | noncoding | noncoding |
| MSTRG. 230507. 1 | DIAPH2       | XLOC_233793 | 305 coding  | noncoding | noncoding | noncoding |
| MSTRG. 230119. 1 |              | XLOC_233805 | 224 coding  | coding    | noncoding | noncoding |
| MSTRG. 230121. 1 |              | XLOC_233807 | 282 coding  | noncoding | noncoding | noncoding |
| MSTRG. 230128. 1 |              | XLOC_233813 | 321 coding  | noncoding | noncoding | noncoding |
| MSTRG. 230129. 1 |              | XLOC_233814 | 280 coding  | noncoding | noncoding | noncoding |
| MSTRG. 230171. 1 |              | XLOC_233826 | 269 coding  | noncoding | noncoding | noncoding |
| MSTRG. 230180. 1 |              | XLOC_233831 | 212 coding  | noncoding | noncoding | noncoding |
| MSTRG. 230185. 1 |              | XLOC_233835 | 218 coding  | noncoding | noncoding | noncoding |
| MSTRG. 230204. 1 | PCDH19       | XLOC_233844 | 309 coding  | noncoding | noncoding | noncoding |
| MSTRG. 230218. 1 | TSPAN6       | XLOC_233851 | 230 coding  | noncoding | noncoding | noncoding |
| MSTRG. 230219. 1 |              | XLOC_233855 | 225 coding  | noncoding | noncoding | noncoding |
| MSTRG. 230249. 1 |              | XLOC_233877 | 439 coding  | noncoding | noncoding | noncoding |
| MSTRG. 230251. 1 |              | XLOC_233878 | 318 coding  | noncoding | noncoding | noncoding |
| MSTRG. 230276. 1 | CENPI        | XLOC_233882 | 239 coding  | noncoding | noncoding | noncoding |
| MSTRG. 230294. 2 | GLA          | XLOC_233892 | 1126 coding | coding    | noncoding | noncoding |
| MSTRG. 230337. 1 | ARMCX4       | XLOC_233896 | 234 coding  | noncoding | noncoding | noncoding |
| MSTRG. 230301. 1 |              | XLOC_233899 | 239 coding  | noncoding | noncoding | noncoding |
| MSTRG. 230364. 1 |              | XLOC_233911 | 228 coding  | coding    | noncoding | noncoding |
| MSTRG. 230372. 1 |              | XLOC_233918 | 285 coding  | coding    | noncoding | noncoding |
| MSTRG. 230373. 1 |              | XLOC_233919 | 324 coding  | noncoding | noncoding | noncoding |
| MSTRG. 230375. 1 | NXF2         | XLOC_233922 | 240 coding  | noncoding | noncoding | noncoding |
| MSTRG. 230382. 1 |              | XLOC_233924 | 244 coding  | noncoding | noncoding | noncoding |
| MSTRG. 230388. 1 |              | XLOC_233926 | 281 coding  | noncoding | noncoding | noncoding |
| MSTRG. 230389. 1 |              | XLOC_233928 | 321 coding  | noncoding | noncoding | noncoding |
| MSTRG. 230402. 1 |              | XLOC_233947 | 254 coding  | noncoding | noncoding | noncoding |
| MSTRG. 230439. 1 | LOC107985661 | XLOC_233973 | 283 coding  | noncoding | noncoding | noncoding |
| MSTRG. 230522. 1 |              | XLOC_234002 | 308 coding  | noncoding | noncoding | noncoding |
| MSTRG. 230550. 1 |              | XLOC_234017 | 264 coding  | noncoding | noncoding | noncoding |

|                  |              |             |             |           |           |           |
|------------------|--------------|-------------|-------------|-----------|-----------|-----------|
| MSTRG. 230556. 1 |              | XLOC_234019 | 282 coding  | noncoding | noncoding | noncoding |
| MSTRG. 230557. 1 |              | XLOC_234020 | 450 coding  | noncoding | noncoding | noncoding |
| MSTRG. 230565. 1 |              | XLOC_234024 | 564 coding  | noncoding | noncoding | noncoding |
| MSTRG. 230614. 1 | IL1RAPL2     | XLOC_234032 | 276 coding  | noncoding | noncoding | noncoding |
| MSTRG. 230624. 1 | IL1RAPL2     | XLOC_234037 | 296 coding  | noncoding | noncoding | noncoding |
| MSTRG. 230570. 1 |              | XLOC_234056 | 285 coding  | coding    | noncoding | noncoding |
| MSTRG. 230590. 1 |              | XLOC_234060 | 217 coding  | coding    | noncoding | noncoding |
| MSTRG. 230588. 1 |              | XLOC_234061 | 455 coding  | noncoding | noncoding | noncoding |
| MSTRG. 230595. 1 |              | XLOC_234063 | 279 coding  | noncoding | noncoding | noncoding |
| MSTRG. 230597. 1 |              | XLOC_234064 | 630 coding  | coding    | noncoding | noncoding |
| MSTRG. 230761. 1 | RADX         | XLOC_234072 | 252 coding  | noncoding | noncoding | noncoding |
| MSTRG. 230856. 1 | FRMPD3       | XLOC_234119 | 264 coding  | noncoding | noncoding | noncoding |
| MSTRG. 230840. 1 |              | XLOC_234120 | 272 coding  | noncoding | noncoding | noncoding |
| MSTRG. 230841. 1 |              | XLOC_234121 | 279 coding  | noncoding | noncoding | noncoding |
| MSTRG. 230968. 1 | VSIG1        | XLOC_234156 | 275 coding  | noncoding | noncoding | noncoding |
| MSTRG. 230924. 1 |              | XLOC_234169 | 295 coding  | noncoding | noncoding | noncoding |
| MSTRG. 230940. 1 |              | XLOC_234172 | 319 coding  | noncoding | noncoding | noncoding |
| MSTRG. 230932. 1 |              | XLOC_234174 | 250 coding  | noncoding | noncoding | noncoding |
| MSTRG. 230933. 1 |              | XLOC_234175 | 249 coding  | noncoding | noncoding | noncoding |
| MSTRG. 230939. 1 |              | XLOC_234177 | 552 coding  | coding    | noncoding | noncoding |
| MSTRG. 230936. 1 |              | XLOC_234178 | 314 coding  | coding    | noncoding | noncoding |
| MSTRG. 230944. 1 |              | XLOC_234179 | 242 coding  | noncoding | noncoding | noncoding |
| MSTRG. 230952. 1 | GUCY2F       | XLOC_234181 | 278 coding  | noncoding | noncoding | noncoding |
| MSTRG. 230987. 1 |              | XLOC_234203 | 386 coding  | noncoding | noncoding | noncoding |
| XM_017029695. 1  | RTL9         | XLOC_234249 | 6418 coding | noncoding | coding    | coding    |
| MSTRG. 231007. 1 |              | XLOC_234255 | 270 coding  | noncoding | noncoding | noncoding |
| MSTRG. 231039. 1 | PAK3         | XLOC_234260 | 247 coding  | noncoding | noncoding | noncoding |
| MSTRG. 231041. 1 | PAK3         | XLOC_234261 | 307 coding  | noncoding | noncoding | noncoding |
| XM_011531028. 2  | ALG13        | XLOC_234271 | 8126 coding | coding    | coding    | coding    |
| MSTRG. 231307. 1 | TRPC5        | XLOC_234285 | 268 coding  | noncoding | noncoding | noncoding |
| MSTRG. 231056. 1 | RTL4         | XLOC_234290 | 231 coding  | noncoding | noncoding | noncoding |
| MSTRG. 231057. 1 | RTL4         | XLOC_234291 | 222 coding  | noncoding | noncoding | noncoding |
| MSTRG. 231067. 1 | RTL4         | XLOC_234293 | 319 coding  | coding    | noncoding | noncoding |
| MSTRG. 231069. 1 | RTL4         | XLOC_234294 | 285 coding  | noncoding | noncoding | noncoding |
| MSTRG. 231129. 1 | LOC101928437 | XLOC_234330 | 288 coding  | noncoding | noncoding | noncoding |
| MSTRG. 231135. 1 | LOC101928437 | XLOC_234333 | 350 coding  | noncoding | noncoding | noncoding |
| MSTRG. 231159. 1 |              | XLOC_234351 | 322 coding  | noncoding | noncoding | noncoding |
| NM_001256760. 2  | HTR2C        | XLOC_234357 | 4842 coding | coding    | coding    | coding    |
| MSTRG. 231199. 1 | HTR2C        | XLOC_234366 | 269 coding  | noncoding | noncoding | noncoding |
| MSTRG. 231182. 1 | IL13RA2      | XLOC_234369 | 439 coding  | noncoding | noncoding | noncoding |
| MSTRG. 231180. 1 |              | XLOC_234371 | 317 coding  | noncoding | noncoding | noncoding |
| MSTRG. 231202. 1 | LRCH2        | XLOC_234373 | 278 coding  | noncoding | noncoding | noncoding |
| MSTRG. 231213. 1 |              | XLOC_234385 | 221 coding  | noncoding | noncoding | noncoding |

|                |              |             |             |           |           |           |
|----------------|--------------|-------------|-------------|-----------|-----------|-----------|
| MSTRG_231214.1 |              | XLOC_234386 | 288 coding  | noncoding | noncoding | noncoding |
| MSTRG_231228.1 |              | XLOC_234394 | 265 coding  | noncoding | noncoding | noncoding |
| MSTRG_231244.1 |              | XLOC_234396 | 244 coding  | noncoding | noncoding | noncoding |
| MSTRG_231246.1 |              | XLOC_234398 | 254 coding  | noncoding | noncoding | noncoding |
| MSTRG_231248.1 |              | XLOC_234399 | 242 coding  | noncoding | noncoding | noncoding |
| NM_000686.5    | AGTR2        | XLOC_234401 | 2862 coding | coding    | coding    | coding    |
| MSTRG_231253.1 |              | XLOC_234402 | 278 coding  | noncoding | noncoding | noncoding |
| NM_007231.5    | SLC6A14      | XLOC_234409 | 4536 coding | coding    | noncoding | coding    |
| MSTRG_231269.1 |              | XLOC_234412 | 234 coding  | noncoding | noncoding | noncoding |
| MSTRG_231274.1 | LOC105373320 | XLOC_234414 | 309 coding  | noncoding | noncoding | noncoding |
| MSTRG_231323.1 |              | XLOC_234424 | 203 coding  | noncoding | noncoding | noncoding |
| MSTRG_231327.1 |              | XLOC_234426 | 320 coding  | noncoding | noncoding | noncoding |
| MSTRG_231414.1 |              | XLOC_234444 | 253 coding  | coding    | noncoding | noncoding |
| MSTRG_231445.1 |              | XLOC_234453 | 294 coding  | noncoding | noncoding | noncoding |
| XM_005262368.4 | DOCK11       | XLOC_234456 | 6915 coding | coding    | coding    | coding    |
| XM_011531276.3 | DOCK11       | XLOC_234456 | 6796 coding | coding    | coding    | coding    |
| MSTRG_231435.1 | LINC01285    | XLOC_234466 | 267 coding  | noncoding | noncoding | noncoding |
| MSTRG_231475.1 |              | XLOC_234474 | 285 coding  | coding    | noncoding | noncoding |
| MSTRG_231473.1 | LOC101928336 | XLOC_234482 | 325 coding  | coding    | noncoding | noncoding |
| MSTRG_231484.1 |              | XLOC_234483 | 345 coding  | coding    | noncoding | noncoding |
| MSTRG_231490.1 | SLC25A43     | XLOC_234487 | 264 coding  | noncoding | noncoding | noncoding |
| MSTRG_231497.1 |              | XLOC_234496 | 268 coding  | noncoding | noncoding | noncoding |
| MSTRG_231523.1 |              | XLOC_234513 | 259 coding  | noncoding | noncoding | noncoding |
| MSTRG_231688.1 | LOC112268302 | XLOC_234575 | 294 coding  | noncoding | noncoding | noncoding |
| MSTRG_231698.1 | LOC112268302 | XLOC_234579 | 274 coding  | noncoding | noncoding | noncoding |
| MSTRG_231674.1 |              | XLOC_234590 | 276 coding  | coding    | noncoding | noncoding |
| MSTRG_231707.1 |              | XLOC_234595 | 638 coding  | coding    | noncoding | noncoding |
| MSTRG_231710.1 |              | XLOC_234600 | 300 coding  | noncoding | noncoding | noncoding |
| MSTRG_231722.1 |              | XLOC_234602 | 269 coding  | noncoding | noncoding | noncoding |
| MSTRG_231724.1 |              | XLOC_234603 | 246 coding  | noncoding | noncoding | noncoding |
| MSTRG_231727.1 |              | XLOC_234604 | 235 coding  | noncoding | noncoding | noncoding |
| MSTRG_231740.1 |              | XLOC_234611 | 249 coding  | noncoding | noncoding | noncoding |
| MSTRG_231741.1 |              | XLOC_234612 | 302 coding  | noncoding | noncoding | noncoding |
| MSTRG_231794.5 | THOC2        | XLOC_234647 | 1359 coding | coding    | noncoding | noncoding |
| MSTRG_231786.1 |              | XLOC_234648 | 323 coding  | noncoding | noncoding | noncoding |
| XM_017029232.1 | STAG2        | XLOC_234654 | 4872 coding | coding    | coding    | coding    |
| XM_005262358.2 | STAG2        | XLOC_234654 | 4998 coding | coding    | coding    | coding    |
| MSTRG_231811.1 |              | XLOC_234686 | 283 coding  | noncoding | noncoding | noncoding |
| MSTRG_231816.1 |              | XLOC_234688 | 286 coding  | noncoding | noncoding | noncoding |
| MSTRG_231830.1 |              | XLOC_234713 | 232 coding  | noncoding | noncoding | noncoding |
| MSTRG_231836.1 |              | XLOC_234718 | 221 coding  | coding    | noncoding | noncoding |
| MSTRG_231853.1 |              | XLOC_234725 | 279 coding  | noncoding | noncoding | noncoding |
| MSTRG_231906.1 |              | XLOC_234728 | 307 coding  | noncoding | noncoding | noncoding |

|                   |              |             |              |           |           |           |
|-------------------|--------------|-------------|--------------|-----------|-----------|-----------|
| MSTRG. 231915. 1  |              | XLOC_234731 | 407 coding   | noncoding | noncoding | noncoding |
| MSTRG. 231919. 1  |              | XLOC_234734 | 314 coding   | noncoding | noncoding | noncoding |
| MSTRG. 231932. 1  |              | XLOC_234745 | 305 coding   | noncoding | noncoding | noncoding |
| MSTRG. 231952. 1  |              | XLOC_234758 | 279 coding   | noncoding | noncoding | noncoding |
| MSTRG. 231966. 1  |              | XLOC_234764 | 251 coding   | noncoding | noncoding | noncoding |
| MSTRG. 231978. 1  |              | XLOC_234771 | 333 coding   | noncoding | noncoding | noncoding |
| MSTRG. 231983. 1  |              | XLOC_234773 | 309 coding   | noncoding | noncoding | noncoding |
| MSTRG. 231997. 1  | LOC107985698 | XLOC_234777 | 311 coding   | noncoding | noncoding | noncoding |
| MSTRG. 232008. 1  | LOC107985698 | XLOC_234784 | 254 coding   | noncoding | noncoding | noncoding |
| MSTRG. 231992. 1  |              | XLOC_234788 | 302 coding   | noncoding | noncoding | noncoding |
| MSTRG. 232024. 1  |              | XLOC_234801 | 277 coding   | noncoding | noncoding | noncoding |
| MSTRG. 232027. 1  |              | XLOC_234803 | 222 coding   | noncoding | coding    | noncoding |
| MSTRG. 232076. 1  | OCRL         | XLOC_234807 | 363 coding   | coding    | noncoding | noncoding |
| MSTRG. 232066. 1  |              | XLOC_234809 | 315 coding   | noncoding | noncoding | noncoding |
| MSTRG. 232065. 1  | APLN         | XLOC_234812 | 300 coding   | noncoding | noncoding | noncoding |
| MSTRG. 232107. 1  |              | XLOC_234824 | 361 coding   | noncoding | noncoding | noncoding |
| MSTRG. 232109. 1  |              | XLOC_234826 | 432 coding   | noncoding | noncoding | noncoding |
| XM_017029722. 1   | BCORL1       | XLOC_234832 | 7848 coding  | coding    | coding    | coding    |
| MSTRG. 232125. 1  |              | XLOC_234837 | 214 coding   | noncoding | noncoding | noncoding |
| MSTRG. 232128. 1  |              | XLOC_234849 | 232 coding   | noncoding | noncoding | noncoding |
| MSTRG. 232193. 1  |              | XLOC_234872 | 211 coding   | noncoding | noncoding | noncoding |
| MSTRG. 232222. 1  | FIRRE        | XLOC_234885 | 718 coding   | noncoding | noncoding | noncoding |
| MSTRG. 232200. 1  |              | XLOC_234887 | 263 coding   | noncoding | noncoding | noncoding |
| MSTRG. 232204. 1  |              | XLOC_234889 | 467 coding   | noncoding | coding    | noncoding |
| MSTRG. 232248. 1  | FRMD7        | XLOC_234910 | 230 coding   | noncoding | noncoding | noncoding |
| MSTRG. 232374. 6  | MBNL3        | XLOC_234922 | 12290 coding | noncoding | noncoding | noncoding |
| MSTRG. 232374. 12 | MBNL3        | XLOC_234922 | 6861 coding  | noncoding | noncoding | noncoding |
| MSTRG. 232253. 1  |              | XLOC_234925 | 249 coding   | noncoding | noncoding | noncoding |
| MSTRG. 232275. 1  | GPC4         | XLOC_234934 | 319 coding   | noncoding | noncoding | noncoding |
| MSTRG. 232338. 1  | HPRT1        | XLOC_234957 | 293 coding   | noncoding | noncoding | noncoding |
| MSTRG. 232340. 1  |              | XLOC_234958 | 258 coding   | noncoding | noncoding | noncoding |
| MSTRG. 232407. 4  | FAM122C      | XLOC_234964 | 5853 coding  | noncoding | noncoding | coding    |
| MSTRG. 232388. 1  |              | XLOC_234969 | 436 coding   | noncoding | noncoding | noncoding |
| MSTRG. 232390. 1  |              | XLOC_234971 | 296 coding   | noncoding | noncoding | noncoding |
| NM_001042537. 1   | SLC9A6       | XLOC_235009 | 4727 coding  | coding    | coding    | coding    |
| MSTRG. 232484. 1  | ADGRG4       | XLOC_235019 | 270 coding   | noncoding | noncoding | noncoding |
| MSTRG. 232559. 1  |              | XLOC_235059 | 314 coding   | noncoding | noncoding | noncoding |
| MSTRG. 232562. 1  |              | XLOC_235060 | 249 coding   | noncoding | noncoding | noncoding |
| MSTRG. 232590. 1  |              | XLOC_235070 | 276 coding   | noncoding | noncoding | noncoding |
| MSTRG. 232595. 1  |              | XLOC_235073 | 228 coding   | noncoding | noncoding | noncoding |
| MSTRG. 232621. 1  |              | XLOC_235088 | 283 coding   | noncoding | noncoding | noncoding |
| MSTRG. 232626. 1  |              | XLOC_235091 | 403 coding   | noncoding | noncoding | noncoding |
| MSTRG. 232628. 1  |              | XLOC_235093 | 204 coding   | noncoding | noncoding | noncoding |

|                  |              |             |              |           |           |           |
|------------------|--------------|-------------|--------------|-----------|-----------|-----------|
| MSTRG. 233018. 1 | FGF13        | XLOC_235110 | 337 coding   | coding    | noncoding | noncoding |
| MSTRG. 233020. 1 | FGF13        | XLOC_235111 | 208 coding   | noncoding | noncoding | noncoding |
| MSTRG. 232635. 1 |              | XLOC_235143 | 257 coding   | noncoding | noncoding | noncoding |
| MSTRG. 232903. 1 | MCF2         | XLOC_235156 | 228 coding   | noncoding | noncoding | noncoding |
| MSTRG. 232664. 1 |              | XLOC_235189 | 289 coding   | noncoding | noncoding | noncoding |
| MSTRG. 232679. 1 |              | XLOC_235196 | 206 coding   | noncoding | noncoding | noncoding |
| MSTRG. 232683. 1 |              | XLOC_235199 | 270 coding   | noncoding | noncoding | noncoding |
| MSTRG. 232684. 1 |              | XLOC_235200 | 238 coding   | noncoding | noncoding | noncoding |
| MSTRG. 232703. 1 | MAGEC3       | XLOC_235209 | 277 coding   | noncoding | noncoding | noncoding |
| MSTRG. 232706. 1 |              | XLOC_235212 | 232 coding   | noncoding | noncoding | noncoding |
| MSTRG. 232708. 1 |              | XLOC_235213 | 468 coding   | coding    | noncoding | noncoding |
| MSTRG. 232715. 1 |              | XLOC_235217 | 252 coding   | noncoding | noncoding | noncoding |
| MSTRG. 232727. 1 |              | XLOC_235222 | 279 coding   | noncoding | noncoding | noncoding |
| MSTRG. 232736. 1 |              | XLOC_235227 | 460 coding   | noncoding | noncoding | noncoding |
| MSTRG. 232739. 1 |              | XLOC_235229 | 270 coding   | noncoding | noncoding | noncoding |
| MSTRG. 232744. 1 |              | XLOC_235232 | 272 coding   | noncoding | noncoding | noncoding |
| MSTRG. 232814. 1 |              | XLOC_235264 | 328 coding   | coding    | noncoding | noncoding |
| MSTRG. 232821. 1 |              | XLOC_235269 | 268 coding   | noncoding | noncoding | noncoding |
| MSTRG. 232831. 1 |              | XLOC_235272 | 232 coding   | coding    | noncoding | noncoding |
| MSTRG. 232833. 1 |              | XLOC_235273 | 318 coding   | noncoding | noncoding | noncoding |
| MSTRG. 232842. 1 |              | XLOC_235278 | 270 coding   | noncoding | noncoding | noncoding |
| MSTRG. 232851. 1 |              | XLOC_235280 | 304 coding   | coding    | noncoding | noncoding |
| MSTRG. 232853. 1 |              | XLOC_235281 | 305 coding   | noncoding | noncoding | noncoding |
| XM_005262343. 3  | SLITRK2      | XLOC_235282 | 9033 coding  | coding    | coding    | coding    |
| MSTRG. 232859. 1 |              | XLOC_235284 | 261 coding   | noncoding | noncoding | noncoding |
| MSTRG. 232866. 1 |              | XLOC_235289 | 227 coding   | noncoding | noncoding | noncoding |
| MSTRG. 232867. 1 |              | XLOC_235290 | 330 coding   | noncoding | noncoding | noncoding |
| MSTRG. 232872. 1 |              | XLOC_235293 | 257 coding   | coding    | noncoding | noncoding |
| MSTRG. 232886. 1 |              | XLOC_235303 | 314 coding   | noncoding | noncoding | noncoding |
| XR_001755970. 2  | LOC105373347 | XLOC_235307 | 10312 coding | noncoding | coding    | noncoding |
| MSTRG. 232946. 1 |              | XLOC_235308 | 311 coding   | noncoding | noncoding | noncoding |
| NM_001185082. 2  | FMR1         | XLOC_235318 | 4303 coding  | coding    | coding    | coding    |
| MSTRG. 232981. 1 | FMR1NB       | XLOC_235325 | 410 coding   | noncoding | noncoding | noncoding |
| MSTRG. 232992. 1 |              | XLOC_235329 | 280 coding   | noncoding | noncoding | noncoding |
| NM_001306144. 3  | MTMR1        | XLOC_235418 | 4536 coding  | coding    | coding    | coding    |
| XM_017029920. 1  | MTMR1        | XLOC_235418 | 3370 coding  | coding    | coding    | coding    |
| MSTRG. 233250. 1 |              | XLOC_235436 | 274 coding   | coding    | noncoding | noncoding |
| MSTRG. 233273. 1 |              | XLOC_235445 | 248 coding   | noncoding | noncoding | noncoding |
| MSTRG. 233276. 1 |              | XLOC_235447 | 445 coding   | coding    | noncoding | noncoding |
| MSTRG. 233280. 1 | PASD1        | XLOC_235450 | 284 coding   | noncoding | noncoding | noncoding |
| MSTRG. 233286. 1 |              | XLOC_235456 | 272 coding   | coding    | noncoding | noncoding |
| MSTRG. 233299. 1 | LOC105373369 | XLOC_235461 | 239 coding   | noncoding | noncoding | noncoding |
| MSTRG. 233416. 1 |              | XLOC_235519 | 282 coding   | noncoding | noncoding | noncoding |

|                  |              |             |             |           |           |           |
|------------------|--------------|-------------|-------------|-----------|-----------|-----------|
| MSTRG. 233415. 1 |              | XLOC_235520 | 259 coding  | noncoding | noncoding | noncoding |
| NM_001142806. 1  | SLC6A8       | XLOC_235523 | 3114 coding | coding    | coding    | coding    |
| NM_001163257. 1  | PLXNB3       | XLOC_235528 | 6377 coding | coding    | coding    | coding    |
| MSTRG. 233450. 1 |              | XLOC_235535 | 264 coding  | noncoding | noncoding | noncoding |
| MSTRG. 233464. 6 | ARHGAP4      | XLOC_235538 | 3025 coding | coding    | coding    | coding    |
| MSTRG. 233468. 1 |              | XLOC_235546 | 266 coding  | noncoding | noncoding | noncoding |
| MSTRG. 233478. 1 |              | XLOC_235552 | 282 coding  | noncoding | noncoding | noncoding |
| MSTRG. 233480. 1 |              | XLOC_235554 | 245 coding  | noncoding | noncoding | noncoding |
| NR_027401. 2     | FAM223A      | XLOC_235578 | 713 coding  | noncoding | coding    | coding    |
| NR_110023. 1     | DKC1         | XLOC_235590 | 2961 coding | coding    | coding    | coding    |
| MSTRG. 233593. 1 | F8           | XLOC_235599 | 274 coding  | noncoding | noncoding | noncoding |
| MSTRG. 233611. 1 | FUNDC2       | XLOC_235601 | 216 coding  | noncoding | coding    | noncoding |
| MSTRG. 233810. 1 |              | XLOC_235618 | 891 coding  | noncoding | noncoding | noncoding |
| MSTRG. 223699. 2 | LOC101928055 | XLOC_235640 | 1152 coding | coding    | coding    | noncoding |
| MSTRG. 223708. 1 | P2RY8        | XLOC_235644 | 245 coding  | noncoding | noncoding | noncoding |
| MSTRG. 223766. 1 | GYG2         | XLOC_235675 | 270 coding  | noncoding | noncoding | noncoding |
| MSTRG. 223767. 1 | GYG2         | XLOC_235676 | 258 coding  | noncoding | noncoding | noncoding |
| MSTRG. 223776. 1 | ARSE         | XLOC_235680 | 276 coding  | noncoding | noncoding | noncoding |
| MSTRG. 223788. 1 | MXRA5        | XLOC_235686 | 298 coding  | noncoding | noncoding | noncoding |
| MSTRG. 223801. 1 |              | XLOC_235699 | 283 coding  | noncoding | noncoding | noncoding |
| MSTRG. 223813. 1 |              | XLOC_235709 | 241 coding  | noncoding | noncoding | noncoding |
| MSTRG. 223811. 1 |              | XLOC_235710 | 279 coding  | noncoding | noncoding | noncoding |
| MSTRG. 223833. 1 |              | XLOC_235721 | 393 coding  | noncoding | noncoding | noncoding |
| NM_001282145. 2  | NLGN4X       | XLOC_235729 | 6165 coding | coding    | coding    | coding    |
| MSTRG. 223872. 1 |              | XLOC_235745 | 243 coding  | noncoding | noncoding | noncoding |
| MSTRG. 223928. 1 | PUDP         | XLOC_235757 | 270 coding  | noncoding | noncoding | noncoding |
| MSTRG. 223972. 1 | PUDP         | XLOC_235764 | 228 coding  | noncoding | noncoding | noncoding |
| MSTRG. 223916. 1 |              | XLOC_235787 | 449 coding  | coding    | noncoding | noncoding |
| MSTRG. 223922. 1 |              | XLOC_235792 | 415 coding  | noncoding | noncoding | noncoding |
| MSTRG. 224101. 1 | LOC107985675 | XLOC_235824 | 286 coding  | noncoding | noncoding | noncoding |
| MSTRG. 224103. 1 | LOC107985675 | XLOC_235826 | 205 coding  | noncoding | noncoding | noncoding |
| NM_000216. 4     | ANOS1        | XLOC_235832 | 6265 coding | coding    | coding    | coding    |
| MSTRG. 224005. 1 | ANOS1        | XLOC_235833 | 323 coding  | noncoding | noncoding | noncoding |
| MSTRG. 224006. 1 | ANOS1        | XLOC_235834 | 295 coding  | noncoding | noncoding | noncoding |
| MSTRG. 224010. 1 | ANOS1        | XLOC_235836 | 289 coding  | noncoding | noncoding | noncoding |
| MSTRG. 224019. 1 |              | XLOC_235839 | 225 coding  | noncoding | noncoding | noncoding |
| MSTRG. 224252. 8 | TBL1X        | XLOC_235855 | 5546 coding | coding    | coding    | coding    |
| MSTRG. 224174. 1 | MID1         | XLOC_235895 | 243 coding  | noncoding | noncoding | noncoding |
| MSTRG. 224176. 1 | MID1         | XLOC_235896 | 212 coding  | noncoding | noncoding | noncoding |
| MSTRG. 224248. 2 | MSL3         | XLOC_235929 | 1981 coding | coding    | noncoding | noncoding |
| MSTRG. 224295. 1 | FRMPD4       | XLOC_235934 | 258 coding  | noncoding | noncoding | noncoding |
| MSTRG. 224334. 1 |              | XLOC_235961 | 300 coding  | noncoding | noncoding | noncoding |
| MSTRG. 224391. 1 |              | XLOC_235988 | 263 coding  | coding    | noncoding | noncoding |

|                  |              |             |             |           |           |           |
|------------------|--------------|-------------|-------------|-----------|-----------|-----------|
| MSTRG. 224416. 1 | EGFL6        | XLOC_235997 | 481 coding  | noncoding | noncoding | noncoding |
| MSTRG. 224475. 5 | TCEANC       | XLOC_235999 | 2916 coding | coding    | noncoding | noncoding |
| MSTRG. 224485. 7 | OFD1         | XLOC_236000 | 436 coding  | noncoding | noncoding | noncoding |
| MSTRG. 224495. 1 | GPM6B        | XLOC_236004 | 255 coding  | noncoding | noncoding | noncoding |
| MSTRG. 224496. 1 | GPM6B        | XLOC_236005 | 306 coding  | noncoding | noncoding | noncoding |
| MSTRG. 224423. 1 |              | XLOC_236012 | 253 coding  | noncoding | noncoding | noncoding |
| MSTRG. 224424. 1 |              | XLOC_236013 | 224 coding  | noncoding | noncoding | noncoding |
| MSTRG. 224518. 1 | FANCB        | XLOC_236028 | 230 coding  | noncoding | noncoding | noncoding |
| MSTRG. 224453. 1 | ASB9         | XLOC_236039 | 233 coding  | noncoding | noncoding | noncoding |
| MSTRG. 224455. 1 | ASB9         | XLOC_236040 | 280 coding  | noncoding | noncoding | noncoding |
| MSTRG. 224467. 1 | ACE2         | XLOC_236047 | 277 coding  | noncoding | noncoding | noncoding |
| MSTRG. 224575. 1 |              | XLOC_236081 | 296 coding  | noncoding | noncoding | noncoding |
| MSTRG. 224744. 1 | SCML2        | XLOC_236148 | 217 coding  | noncoding | noncoding | noncoding |
| MSTRG. 224736. 1 |              | XLOC_236149 | 247 coding  | noncoding | noncoding | noncoding |
| MSTRG. 224796. 2 | CDKL5        | XLOC_236151 | 444 coding  | coding    | noncoding | noncoding |
| MSTRG. 224805. 1 |              | XLOC_236190 | 234 coding  | noncoding | noncoding | noncoding |
| MSTRG. 224825. 1 | MAP3K15      | XLOC_236198 | 292 coding  | noncoding | noncoding | noncoding |
| NM_031892. 3     | SH3KBP1      | XLOC_236199 | 4728 coding | coding    | coding    | coding    |
| MSTRG. 224988. 1 | SH3KBP1      | XLOC_236205 | 358 coding  | noncoding | noncoding | noncoding |
| MSTRG. 225030. 1 | SH3KBP1      | XLOC_236246 | 292 coding  | noncoding | noncoding | noncoding |
| MSTRG. 224863. 1 | BCLAF3       | XLOC_236251 | 286 coding  | noncoding | noncoding | noncoding |
| MSTRG. 224930. 1 | RPS6KA3      | XLOC_236271 | 283 coding  | noncoding | noncoding | noncoding |
| MSTRG. 224931. 1 | RPS6KA3      | XLOC_236272 | 274 coding  | noncoding | noncoding | noncoding |
| MSTRG. 224896. 1 |              | XLOC_236294 | 299 coding  | noncoding | noncoding | noncoding |
| MSTRG. 224905. 1 |              | XLOC_236299 | 300 coding  | noncoding | noncoding | noncoding |
| MSTRG. 225035. 1 |              | XLOC_236392 | 275 coding  | noncoding | noncoding | noncoding |
| MSTRG. 225140. 1 | PHEX         | XLOC_236398 | 291 coding  | noncoding | noncoding | noncoding |
| MSTRG. 225169. 1 | PTCHD1-AS    | XLOC_236413 | 314 coding  | noncoding | noncoding | noncoding |
| MSTRG. 225123. 1 |              | XLOC_236426 | 271 coding  | noncoding | noncoding | noncoding |
| MSTRG. 225129. 1 |              | XLOC_236430 | 230 coding  | coding    | noncoding | noncoding |
| MSTRG. 225199. 1 | LOC105373148 | XLOC_236433 | 279 coding  | noncoding | noncoding | noncoding |
| MSTRG. 225195. 1 |              | XLOC_236436 | 315 coding  | noncoding | noncoding | noncoding |
| MSTRG. 225216. 1 |              | XLOC_236443 | 317 coding  | noncoding | noncoding | noncoding |
| MSTRG. 225238. 1 |              | XLOC_236459 | 297 coding  | noncoding | noncoding | noncoding |
| MSTRG. 225386. 6 | POLA1        | XLOC_236469 | 1095 coding | coding    | noncoding | noncoding |
| MSTRG. 225386. 7 | POLA1        | XLOC_236469 | 1447 coding | coding    | coding    | noncoding |
| MSTRG. 225282. 1 |              | XLOC_236477 | 279 coding  | noncoding | noncoding | noncoding |
| MSTRG. 225295. 1 |              | XLOC_236483 | 206 coding  | coding    | noncoding | noncoding |
| MSTRG. 225297. 1 | LOC107985707 | XLOC_236484 | 309 coding  | noncoding | noncoding | noncoding |
| MSTRG. 225300. 1 |              | XLOC_236485 | 283 coding  | noncoding | noncoding | noncoding |
| MSTRG. 225343. 1 |              | XLOC_236512 | 272 coding  | noncoding | noncoding | noncoding |
| MSTRG. 225361. 1 | DCAF8L2      | XLOC_236520 | 256 coding  | noncoding | noncoding | noncoding |
| NM_001017930. 2  | DCAF8L1      | XLOC_236527 | 3458 coding | coding    | coding    | coding    |

|                   |              |             |              |           |           |           |
|-------------------|--------------|-------------|--------------|-----------|-----------|-----------|
| MSTRG. 225365. 1  |              | XLOC_236528 | 291 coding   | noncoding | noncoding | noncoding |
| MSTRG. 225367. 1  |              | XLOC_236529 | 281 coding   | noncoding | noncoding | noncoding |
| MSTRG. 225424. 1  | IL1RAPL1     | XLOC_236537 | 253 coding   | noncoding | noncoding | noncoding |
| MSTRG. 225464. 1  | IL1RAPL1     | XLOC_236556 | 258 coding   | noncoding | noncoding | noncoding |
| MSTRG. 225419. 1  |              | XLOC_236569 | 210 coding   | noncoding | noncoding | noncoding |
| MSTRG. 225485. 1  | CXorf21      | XLOC_236576 | 223 coding   | noncoding | noncoding | noncoding |
| MSTRG. 225508. 1  |              | XLOC_236584 | 275 coding   | noncoding | noncoding | noncoding |
| MSTRG. 225545. 9  | GK           | XLOC_236586 | 2681 coding  | coding    | coding    | noncoding |
| MSTRG. 225545. 17 | GK           | XLOC_236586 | 4226 coding  | coding    | noncoding | noncoding |
| NM_004010. 3      | DMD          | XLOC_236611 | 14083 coding | coding    | noncoding | coding    |
| XM_017029329. 1   | DMD          | XLOC_236611 | 8969 coding  | coding    | coding    | coding    |
| MSTRG. 225696. 1  | DMD          | XLOC_236613 | 247 coding   | noncoding | noncoding | noncoding |
| MSTRG. 225698. 1  | DMD          | XLOC_236615 | 384 coding   | noncoding | noncoding | noncoding |
| MSTRG. 225705. 1  | DMD          | XLOC_236618 | 294 coding   | noncoding | noncoding | noncoding |
| MSTRG. 225711. 1  | DMD          | XLOC_236622 | 256 coding   | noncoding | noncoding | noncoding |
| MSTRG. 225718. 1  | DMD          | XLOC_236628 | 319 coding   | coding    | noncoding | noncoding |
| MSTRG. 225731. 1  | DMD          | XLOC_236636 | 270 coding   | noncoding | noncoding | noncoding |
| MSTRG. 225738. 1  | DMD          | XLOC_236639 | 340 coding   | noncoding | noncoding | noncoding |
| MSTRG. 225575. 1  |              | XLOC_236659 | 221 coding   | noncoding | noncoding | noncoding |
| MSTRG. 225576. 1  |              | XLOC_236661 | 327 coding   | coding    | noncoding | noncoding |
| MSTRG. 225610. 1  |              | XLOC_236669 | 295 coding   | noncoding | noncoding | noncoding |
| MSTRG. 225611. 1  |              | XLOC_236670 | 449 coding   | noncoding | noncoding | noncoding |
| MSTRG. 225617. 1  |              | XLOC_236672 | 303 coding   | noncoding | noncoding | noncoding |
| MSTRG. 225630. 1  |              | XLOC_236677 | 282 coding   | noncoding | noncoding | noncoding |
| MSTRG. 225633. 1  |              | XLOC_236679 | 274 coding   | noncoding | noncoding | noncoding |
| MSTRG. 225664. 1  | CFAP47       | XLOC_236689 | 271 coding   | noncoding | noncoding | noncoding |
| MSTRG. 225668. 1  | CFAP47       | XLOC_236691 | 265 coding   | noncoding | noncoding | noncoding |
| MSTRG. 225653. 1  | LOC105373155 | XLOC_236695 | 211 coding   | noncoding | noncoding | noncoding |
| MSTRG. 225673. 1  |              | XLOC_236697 | 241 coding   | noncoding | noncoding | noncoding |
| MSTRG. 225674. 1  |              | XLOC_236698 | 296 coding   | noncoding | noncoding | noncoding |
| MSTRG. 225676. 1  |              | XLOC_236700 | 328 coding   | noncoding | noncoding | noncoding |
| MSTRG. 225678. 1  | LOC105373154 | XLOC_236702 | 201 coding   | noncoding | noncoding | noncoding |
| MSTRG. 225681. 1  |              | XLOC_236703 | 209 coding   | noncoding | noncoding | noncoding |
| MSTRG. 225684. 1  |              | XLOC_236706 | 288 coding   | noncoding | noncoding | noncoding |
| MSTRG. 225791. 1  |              | XLOC_236721 | 226 coding   | noncoding | noncoding | noncoding |
| MSTRG. 225814. 1  | SYTL5        | XLOC_236722 | 275 coding   | noncoding | noncoding | noncoding |
| MSTRG. 225858. 1  | RPGR         | XLOC_236735 | 221 coding   | noncoding | noncoding | noncoding |
| MSTRG. 225830. 1  |              | XLOC_236746 | 233 coding   | noncoding | noncoding | noncoding |
| MSTRG. 225841. 1  |              | XLOC_236753 | 302 coding   | noncoding | noncoding | noncoding |
| MSTRG. 225983. 1  |              | XLOC_236806 | 263 coding   | noncoding | noncoding | noncoding |
| MSTRG. 225946. 1  |              | XLOC_236824 | 207 coding   | noncoding | noncoding | noncoding |
| MSTRG. 226061. 1  | BCOR         | XLOC_236847 | 511 coding   | noncoding | noncoding | noncoding |
| MSTRG. 226039. 1  | LOC105373182 | XLOC_236852 | 278 coding   | noncoding | noncoding | noncoding |

|                |           |             |             |           |           |           |
|----------------|-----------|-------------|-------------|-----------|-----------|-----------|
| XM_017029304.1 | CXorf38   | XLOC_236860 | 5412 coding | coding    | coding    | coding    |
| MSTRG.226096.2 | MED14     | XLOC_236862 | 6583 coding | coding    | coding    | coding    |
| MSTRG.226102.1 | MED14     | XLOC_236867 | 253 coding  | noncoding | noncoding | noncoding |
| MSTRG.226089.1 |           | XLOC_236878 | 426 coding  | noncoding | noncoding | noncoding |
| MSTRG.226090.1 |           | XLOC_236879 | 298 coding  | noncoding | noncoding | noncoding |
| MSTRG.226114.1 |           | XLOC_236889 | 417 coding  | noncoding | noncoding | noncoding |
| MSTRG.226145.1 | NYX       | XLOC_236892 | 276 coding  | noncoding | noncoding | noncoding |
| MSTRG.226321.1 | CASK      | XLOC_236912 | 716 coding  | noncoding | noncoding | noncoding |
| MSTRG.226331.1 | CASK      | XLOC_236920 | 348 coding  | noncoding | noncoding | noncoding |
| MSTRG.226174.1 |           | XLOC_236947 | 210 coding  | noncoding | noncoding | noncoding |
| MSTRG.226188.1 |           | XLOC_236955 | 202 coding  | noncoding | noncoding | noncoding |
| MSTRG.226194.1 |           | XLOC_236962 | 246 coding  | noncoding | noncoding | noncoding |
| MSTRG.226199.1 |           | XLOC_236969 | 331 coding  | noncoding | noncoding | noncoding |
| MSTRG.226245.1 | MAOA      | XLOC_236980 | 299 coding  | noncoding | noncoding | noncoding |
| MSTRG.226255.1 |           | XLOC_236988 | 306 coding  | noncoding | noncoding | noncoding |
| MSTRG.226287.5 | EFHC2     | XLOC_236993 | 288 coding  | noncoding | noncoding | noncoding |
| MSTRG.226269.1 |           | XLOC_237002 | 223 coding  | noncoding | noncoding | noncoding |
| MSTRG.226270.1 |           | XLOC_237003 | 255 coding  | noncoding | noncoding | noncoding |
| MSTRG.226279.1 |           | XLOC_237004 | 230 coding  | noncoding | noncoding | noncoding |
| MSTRG.226280.1 |           | XLOC_237005 | 239 coding  | noncoding | noncoding | noncoding |
| MSTRG.226282.1 |           | XLOC_237006 | 256 coding  | noncoding | noncoding | noncoding |
| MSTRG.226285.1 |           | XLOC_237008 | 265 coding  | noncoding | noncoding | noncoding |
| MSTRG.226412.1 |           | XLOC_237071 | 299 coding  | noncoding | noncoding | noncoding |
| MSTRG.226422.1 | LOC392452 | XLOC_237077 | 277 coding  | noncoding | noncoding | noncoding |
| MSTRG.226421.1 |           | XLOC_237078 | 292 coding  | noncoding | noncoding | noncoding |
| MSTRG.226532.1 |           | XLOC_237095 | 230 coding  | noncoding | noncoding | noncoding |
| MSTRG.226536.1 |           | XLOC_237098 | 303 coding  | noncoding | noncoding | noncoding |
| MSTRG.226565.1 | JADE3     | XLOC_237137 | 215 coding  | noncoding | noncoding | noncoding |
| MSTRG.226568.1 | JADE3     | XLOC_237140 | 297 coding  | noncoding | noncoding | noncoding |
| MSTRG.226579.1 | RGN       | XLOC_237149 | 284 coding  | noncoding | noncoding | noncoding |
| MSTRG.226587.1 |           | XLOC_237159 | 298 coding  | noncoding | noncoding | noncoding |
| MSTRG.226596.1 |           | XLOC_237163 | 274 coding  | noncoding | noncoding | noncoding |
| MSTRG.226608.1 |           | XLOC_237172 | 268 coding  | noncoding | noncoding | noncoding |
| MSTRG.226653.1 |           | XLOC_237173 | 247 coding  | noncoding | noncoding | noncoding |
| MSTRG.226675.1 | CXXC1P1   | XLOC_237181 | 283 coding  | noncoding | noncoding | noncoding |
| MSTRG.226683.1 |           | XLOC_237185 | 285 coding  | noncoding | noncoding | noncoding |
| MSTRG.226731.1 |           | XLOC_237204 | 274 coding  | noncoding | noncoding | noncoding |
| MSTRG.226735.1 |           | XLOC_237206 | 269 coding  | noncoding | noncoding | noncoding |
| MSTRG.226738.1 |           | XLOC_237208 | 285 coding  | noncoding | noncoding | noncoding |
| MSTRG.226770.1 | WDR13     | XLOC_237224 | 304 coding  | noncoding | noncoding | noncoding |
| MSTRG.226765.1 |           | XLOC_237226 | 297 coding  | noncoding | noncoding | noncoding |
| XM_005278039.4 | OTUD5     | XLOC_237245 | 5674 coding | coding    | coding    | coding    |
| MSTRG.226832.1 | OTUD5     | XLOC_237246 | 477 coding  | noncoding | noncoding | noncoding |

|                  |           |             |             |           |           |           |
|------------------|-----------|-------------|-------------|-----------|-----------|-----------|
| MSTRG. 226834. 1 | OTUD5     | XLOC_237248 | 303 coding  | noncoding | noncoding | noncoding |
| MSTRG. 226837. 1 |           | XLOC_237254 | 292 coding  | noncoding | noncoding | noncoding |
| NM_003179. 2     | SYP       | XLOC_237268 | 2433 coding | coding    | coding    | coding    |
| MSTRG. 226890. 1 |           | XLOC_237282 | 284 coding  | noncoding | noncoding | noncoding |
| MSTRG. 226894. 1 |           | XLOC_237283 | 343 coding  | noncoding | noncoding | noncoding |
| MSTRG. 226911. 1 | CCNB3     | XLOC_237297 | 297 coding  | noncoding | noncoding | noncoding |
| MSTRG. 226924. 1 | DGKK      | XLOC_237299 | 241 coding  | noncoding | noncoding | noncoding |
| MSTRG. 227078. 1 | LINC01284 | XLOC_237314 | 287 coding  | noncoding | noncoding | noncoding |
| MSTRG. 227089. 1 |           | XLOC_237316 | 327 coding  | noncoding | noncoding | noncoding |
| MSTRG. 227010. 1 |           | XLOC_237371 | 262 coding  | coding    | noncoding | noncoding |
| MSTRG. 227012. 1 |           | XLOC_237373 | 243 coding  | noncoding | noncoding | noncoding |
| MSTRG. 227015. 1 |           | XLOC_237375 | 265 coding  | noncoding | noncoding | noncoding |
| MSTRG. 227033. 1 |           | XLOC_237390 | 246 coding  | noncoding | noncoding | noncoding |
| MSTRG. 227039. 1 |           | XLOC_237392 | 240 coding  | noncoding | noncoding | noncoding |
| MSTRG. 227050. 1 |           | XLOC_237398 | 274 coding  | coding    | noncoding | noncoding |
| MSTRG. 227177. 1 | GPR173    | XLOC_237414 | 283 coding  | noncoding | noncoding | noncoding |
| NM_001353978. 2  | KDM5C     | XLOC_237422 | 6638 coding | coding    | coding    | coding    |
| MSTRG. 227229. 1 | IQSEC2    | XLOC_237430 | 299 coding  | noncoding | noncoding | noncoding |
| MSTRG. 227185. 1 |           | XLOC_237436 | 204 coding  | noncoding | noncoding | noncoding |
| MSTRG. 227349. 1 |           | XLOC_237446 | 258 coding  | noncoding | noncoding | noncoding |
| MSTRG. 227286. 1 | PHF8      | XLOC_237452 | 243 coding  | noncoding | noncoding | noncoding |
| MSTRG. 227289. 1 | PHF8      | XLOC_237455 | 661 coding  | noncoding | noncoding | noncoding |
| MSTRG. 227240. 1 |           | XLOC_237456 | 236 coding  | noncoding | noncoding | noncoding |
| MSTRG. 227266. 1 | WNK3      | XLOC_237466 | 210 coding  | noncoding | noncoding | noncoding |
| MSTRG. 227271. 1 | WNK3      | XLOC_237468 | 289 coding  | noncoding | noncoding | noncoding |
| MSTRG. 227256. 1 |           | XLOC_237469 | 264 coding  | noncoding | noncoding | noncoding |
| MSTRG. 227257. 1 |           | XLOC_237470 | 281 coding  | noncoding | noncoding | noncoding |
| MSTRG. 227291. 1 |           | XLOC_237496 | 268 coding  | noncoding | noncoding | noncoding |
| MSTRG. 227298. 1 | ITIH6     | XLOC_237501 | 264 coding  | coding    | noncoding | noncoding |
| MSTRG. 227300. 1 |           | XLOC_237503 | 319 coding  | noncoding | noncoding | noncoding |
| MSTRG. 227389. 2 | ALAS2     | XLOC_237509 | 2008 coding | coding    | coding    | coding    |
| MSTRG. 227372. 1 |           | XLOC_237519 | 259 coding  | noncoding | noncoding | noncoding |
| MSTRG. 227401. 1 |           | XLOC_237529 | 248 coding  | noncoding | noncoding | noncoding |
| MSTRG. 227442. 1 |           | XLOC_237653 | 228 coding  | coding    | noncoding | noncoding |
| MSTRG. 227564. 1 |           | XLOC_237759 | 261 coding  | noncoding | noncoding | noncoding |
| MSTRG. 227706. 1 |           | XLOC_237790 | 306 coding  | noncoding | noncoding | noncoding |
| MSTRG. 227711. 1 |           | XLOC_237793 | 284 coding  | noncoding | noncoding | noncoding |
| MSTRG. 227713. 1 |           | XLOC_237795 | 228 coding  | noncoding | noncoding | noncoding |
| MSTRG. 227715. 1 |           | XLOC_237796 | 267 coding  | noncoding | noncoding | noncoding |
| MSTRG. 227750. 1 |           | XLOC_237804 | 277 coding  | noncoding | noncoding | noncoding |
| MSTRG. 227763. 1 |           | XLOC_237831 | 854 coding  | coding    | noncoding | noncoding |
| MSTRG. 227772. 1 |           | XLOC_237833 | 313 coding  | noncoding | noncoding | noncoding |
| NM_152424. 4     | AMER1     | XLOC_237837 | 8407 coding | coding    | coding    | coding    |

|                  |              |             |             |           |           |           |
|------------------|--------------|-------------|-------------|-----------|-----------|-----------|
| MSTRG. 227982. 1 | MTMR8        | XLOC_237842 | 280 coding  | coding    | noncoding | noncoding |
| MSTRG. 228006. 1 | MTMR8        | XLOC_237849 | 336 coding  | noncoding | noncoding | noncoding |
| MSTRG. 227946. 1 |              | XLOC_237852 | 283 coding  | noncoding | noncoding | noncoding |
| MSTRG. 227949. 1 |              | XLOC_237853 | 292 coding  | noncoding | coding    | noncoding |
| MSTRG. 227951. 1 |              | XLOC_237854 | 229 coding  | noncoding | noncoding | noncoding |
| MSTRG. 227959. 1 | LOC105373239 | XLOC_237856 | 276 coding  | coding    | noncoding | noncoding |
| MSTRG. 228478. 1 | ZC4H2        | XLOC_237871 | 426 coding  | noncoding | noncoding | noncoding |
| MSTRG. 228480. 1 | ZC4H2        | XLOC_237873 | 291 coding  | noncoding | noncoding | noncoding |
| MSTRG. 228481. 1 | ZC4H2        | XLOC_237874 | 413 coding  | noncoding | noncoding | noncoding |
| MSTRG. 228234. 1 |              | XLOC_237998 | 274 coding  | noncoding | noncoding | noncoding |
| MSTRG. 228068. 1 |              | XLOC_238007 | 233 coding  | noncoding | noncoding | noncoding |
| MSTRG. 228078. 1 |              | XLOC_238011 | 299 coding  | coding    | noncoding | noncoding |
| MSTRG. 228104. 1 |              | XLOC_238031 | 308 coding  | noncoding | noncoding | noncoding |
| MSTRG. 228172. 1 |              | XLOC_238060 | 280 coding  | noncoding | noncoding | noncoding |
| MSTRG. 228238. 1 |              | XLOC_238071 | 299 coding  | noncoding | noncoding | noncoding |
| MSTRG. 228276. 1 |              | XLOC_238082 | 815 coding  | noncoding | noncoding | noncoding |
| MSTRG. 228286. 1 |              | XLOC_238088 | 252 coding  | noncoding | noncoding | noncoding |
| MSTRG. 228342. 1 | EDA          | XLOC_238111 | 268 coding  | noncoding | noncoding | noncoding |
| MSTRG. 228302. 1 | DGAT2L6      | XLOC_238176 | 292 coding  | noncoding | noncoding | noncoding |
| MSTRG. 228320. 1 | KIF4A        | XLOC_238183 | 316 coding  | noncoding | noncoding | noncoding |
| MSTRG. 228425. 1 | TEX11        | XLOC_238191 | 287 coding  | noncoding | noncoding | noncoding |
| MSTRG. 228443. 1 | TEX11        | XLOC_238201 | 253 coding  | noncoding | noncoding | noncoding |
| MSTRG. 228444. 1 | TEX11        | XLOC_238202 | 270 coding  | noncoding | noncoding | noncoding |
| MSTRG. 228417. 1 |              | XLOC_238205 | 263 coding  | noncoding | noncoding | noncoding |
| MSTRG. 228616. 2 | NLGN3        | XLOC_238215 | 860 coding  | coding    | coding    | noncoding |
| MSTRG. 228624. 1 | NLGN3        | XLOC_238219 | 268 coding  | coding    | noncoding | noncoding |
| MSTRG. 228642. 6 | TAF1         | XLOC_238234 | 3898 coding | coding    | coding    | coding    |
| MSTRG. 228642. 8 | TAF1         | XLOC_238234 | 1759 coding | noncoding | noncoding | noncoding |
| MSTRG. 228650. 1 | TAF1         | XLOC_238237 | 262 coding  | noncoding | coding    | noncoding |
| MSTRG. 228653. 1 | TAF1         | XLOC_238239 | 293 coding  | noncoding | noncoding | noncoding |
| MSTRG. 228657. 1 |              | XLOC_238249 | 297 coding  | noncoding | noncoding | noncoding |
| MSTRG. 228659. 1 |              | XLOC_238252 | 302 coding  | noncoding | noncoding | noncoding |
| MSTRG. 228664. 1 |              | XLOC_238261 | 209 coding  | noncoding | noncoding | noncoding |
| MSTRG. 228698. 1 |              | XLOC_238280 | 268 coding  | noncoding | noncoding | noncoding |
| XM_005262287. 4  | DMRTC1       | XLOC_238305 | 1457 coding | coding    | coding    | coding    |
| MSTRG. 228758. 1 |              | XLOC_238307 | 240 coding  | noncoding | noncoding | noncoding |
| MSTRG. 228771. 1 |              | XLOC_238313 | 238 coding  | noncoding | noncoding | noncoding |
| MSTRG. 228776. 1 |              | XLOC_238316 | 320 coding  | coding    | noncoding | noncoding |
| MSTRG. 228777. 1 |              | XLOC_238317 | 307 coding  | noncoding | noncoding | noncoding |
| MSTRG. 228784. 1 |              | XLOC_238321 | 320 coding  | noncoding | noncoding | noncoding |
| NR_029423. 1     | MAP2K4P1     | XLOC_238322 | 2539 coding | coding    | coding    | coding    |
| MSTRG. 228838. 3 | CHIC1        | XLOC_238323 | 628 coding  | coding    | noncoding | noncoding |
| MSTRG. 228797. 1 |              | XLOC_238332 | 286 coding  | noncoding | noncoding | noncoding |

|                  |              |             |             |           |           |           |
|------------------|--------------|-------------|-------------|-----------|-----------|-----------|
| MSTRG. 229103. 1 | FTX          | XLOC_238383 | 333 coding  | noncoding | noncoding | noncoding |
| MSTRG. 228850. 1 |              | XLOC_238399 | 292 coding  | noncoding | noncoding | noncoding |
| MSTRG. 228874. 1 |              | XLOC_238413 | 256 coding  | coding    | noncoding | noncoding |
| MSTRG. 229200. 1 | ABCB7        | XLOC_238419 | 365 coding  | noncoding | noncoding | noncoding |
| XM_024452342. 1  | ZDHC15       | XLOC_238448 | 6142 coding | coding    | coding    | coding    |
| MSTRG. 229248. 1 | ZDHC15       | XLOC_238454 | 263 coding  | noncoding | noncoding | noncoding |
| MSTRG. 229249. 1 | ZDHC15       | XLOC_238455 | 249 coding  | noncoding | noncoding | noncoding |
| MSTRG. 229251. 1 | ZDHC15       | XLOC_238456 | 259 coding  | coding    | noncoding | noncoding |
| MSTRG. 229253. 1 | ZDHC15       | XLOC_238457 | 255 coding  | noncoding | noncoding | noncoding |
| MSTRG. 228900. 1 |              | XLOC_238479 | 323 coding  | noncoding | noncoding | noncoding |
| MSTRG. 228901. 1 |              | XLOC_238480 | 288 coding  | coding    | noncoding | noncoding |
| MSTRG. 228902. 1 |              | XLOC_238481 | 221 coding  | noncoding | noncoding | noncoding |
| MSTRG. 228905. 1 |              | XLOC_238482 | 336 coding  | noncoding | coding    | noncoding |
| MSTRG. 228906. 1 |              | XLOC_238483 | 221 coding  | noncoding | noncoding | noncoding |
| MSTRG. 228926. 1 |              | XLOC_238493 | 453 coding  | noncoding | noncoding | noncoding |
| MSTRG. 228928. 1 |              | XLOC_238494 | 251 coding  | noncoding | noncoding | noncoding |
| MSTRG. 228930. 1 |              | XLOC_238495 | 238 coding  | coding    | noncoding | noncoding |
| MSTRG. 228952. 1 |              | XLOC_238509 | 353 coding  | noncoding | noncoding | noncoding |
| MSTRG. 228954. 1 |              | XLOC_238511 | 274 coding  | noncoding | noncoding | noncoding |
| MSTRG. 228962. 1 |              | XLOC_238519 | 294 coding  | noncoding | noncoding | noncoding |
| MSTRG. 228985. 1 |              | XLOC_238525 | 257 coding  | noncoding | noncoding | noncoding |
| MSTRG. 229120. 1 |              | XLOC_238531 | 259 coding  | noncoding | noncoding | noncoding |
| MSTRG. 229131. 1 | MAGT1        | XLOC_238534 | 297 coding  | noncoding | noncoding | noncoding |
| MSTRG. 229133. 1 | MAGT1        | XLOC_238536 | 275 coding  | noncoding | noncoding | noncoding |
| MSTRG. 229146. 6 | ATP7A        | XLOC_238540 | 3239 coding | coding    | noncoding | coding    |
| MSTRG. 229143. 1 |              | XLOC_238545 | 321 coding  | coding    | noncoding | noncoding |
| MSTRG. 229162. 1 |              | XLOC_238551 | 290 coding  | noncoding | noncoding | noncoding |
| MSTRG. 229161. 1 |              | XLOC_238552 | 209 coding  | noncoding | noncoding | noncoding |
| MSTRG. 229303. 1 |              | XLOC_238563 | 316 coding  | noncoding | noncoding | noncoding |
| MSTRG. 229305. 1 |              | XLOC_238565 | 252 coding  | noncoding | noncoding | noncoding |
| MSTRG. 229316. 1 |              | XLOC_238575 | 237 coding  | noncoding | noncoding | noncoding |
| MSTRG. 229317. 1 |              | XLOC_238576 | 274 coding  | coding    | noncoding | noncoding |
| MSTRG. 229319. 1 |              | XLOC_238577 | 312 coding  | noncoding | noncoding | noncoding |
| MSTRG. 229322. 1 |              | XLOC_238578 | 402 coding  | coding    | noncoding | noncoding |
| MSTRG. 229405. 9 | LOC107985690 | XLOC_238580 | 3643 coding | coding    | noncoding | noncoding |
| MSTRG. 229376. 1 | TENT5D       | XLOC_238628 | 279 coding  | noncoding | noncoding | noncoding |
| MSTRG. 229381. 1 |              | XLOC_238630 | 255 coding  | noncoding | noncoding | noncoding |
| MSTRG. 229398. 1 |              | XLOC_238667 | 313 coding  | noncoding | noncoding | noncoding |
| MSTRG. 229503. 1 |              | XLOC_238684 | 249 coding  | noncoding | noncoding | noncoding |
| MSTRG. 229506. 1 |              | XLOC_238685 | 225 coding  | noncoding | noncoding | noncoding |
| MSTRG. 229517. 1 |              | XLOC_238691 | 267 coding  | coding    | noncoding | noncoding |
| MSTRG. 229523. 1 |              | XLOC_238695 | 258 coding  | noncoding | noncoding | noncoding |
| MSTRG. 229524. 1 |              | XLOC_238696 | 236 coding  | noncoding | noncoding | noncoding |

|                  |         |             |            |           |           |           |
|------------------|---------|-------------|------------|-----------|-----------|-----------|
| MSTRG. 229527. 1 |         | XLOC_238699 | 306 coding | noncoding | noncoding | noncoding |
| MSTRG. 229532. 1 |         | XLOC_238701 | 269 coding | noncoding | noncoding | noncoding |
| MSTRG. 229556. 1 |         | XLOC_238711 | 317 coding | noncoding | noncoding | noncoding |
| MSTRG. 229561. 1 |         | XLOC_238713 | 241 coding | noncoding | noncoding | noncoding |
| MSTRG. 229564. 1 |         | XLOC_238714 | 274 coding | noncoding | noncoding | noncoding |
| MSTRG. 229568. 1 |         | XLOC_238715 | 293 coding | noncoding | noncoding | noncoding |
| MSTRG. 229638. 1 |         | XLOC_238723 | 303 coding | noncoding | noncoding | noncoding |
| MSTRG. 229654. 1 |         | XLOC_238735 | 323 coding | noncoding | noncoding | noncoding |
| MSTRG. 229730. 1 | SATL1   | XLOC_238743 | 234 coding | noncoding | noncoding | noncoding |
| MSTRG. 229691. 1 | POF1B   | XLOC_238748 | 261 coding | noncoding | noncoding | noncoding |
| MSTRG. 229710. 1 |         | XLOC_238756 | 312 coding | noncoding | noncoding | noncoding |
| MSTRG. 229714. 1 |         | XLOC_238758 | 258 coding | noncoding | noncoding | noncoding |
| MSTRG. 229764. 1 | DACH2   | XLOC_238777 | 225 coding | noncoding | noncoding | noncoding |
| MSTRG. 229778. 1 | DACH2   | XLOC_238788 | 303 coding | noncoding | noncoding | noncoding |
| MSTRG. 229747. 1 |         | XLOC_238794 | 286 coding | noncoding | noncoding | noncoding |
| MSTRG. 229789. 1 |         | XLOC_238806 | 293 coding | noncoding | noncoding | noncoding |
| MSTRG. 229810. 1 |         | XLOC_238820 | 229 coding | noncoding | noncoding | noncoding |
| MSTRG. 229812. 1 |         | XLOC_238822 | 236 coding | noncoding | noncoding | noncoding |
| MSTRG. 229846. 1 |         | XLOC_238836 | 238 coding | noncoding | noncoding | noncoding |
| MSTRG. 229906. 1 |         | XLOC_238866 | 285 coding | noncoding | noncoding | noncoding |
| MSTRG. 229909. 1 |         | XLOC_238868 | 205 coding | noncoding | noncoding | noncoding |
| MSTRG. 229935. 1 |         | XLOC_238881 | 256 coding | noncoding | noncoding | noncoding |
| MSTRG. 229941. 1 |         | XLOC_238886 | 272 coding | noncoding | noncoding | noncoding |
| MSTRG. 229945. 1 |         | XLOC_238888 | 254 coding | noncoding | noncoding | noncoding |
| MSTRG. 229950. 1 |         | XLOC_238892 | 307 coding | noncoding | noncoding | noncoding |
| MSTRG. 229951. 1 |         | XLOC_238893 | 206 coding | noncoding | noncoding | noncoding |
| MSTRG. 229952. 1 |         | XLOC_238894 | 321 coding | noncoding | noncoding | noncoding |
| MSTRG. 229988. 1 | PCDH11X | XLOC_238899 | 325 coding | noncoding | noncoding | noncoding |
| MSTRG. 229992. 1 | PCDH11X | XLOC_238902 | 267 coding | noncoding | noncoding | noncoding |
| MSTRG. 229997. 1 | PCDH11X | XLOC_238905 | 212 coding | noncoding | noncoding | noncoding |
| MSTRG. 230005. 1 | PCDH11X | XLOC_238911 | 266 coding | noncoding | noncoding | noncoding |
| MSTRG. 230008. 1 | PCDH11X | XLOC_238913 | 274 coding | noncoding | noncoding | noncoding |
| MSTRG. 229976. 1 |         | XLOC_238927 | 206 coding | noncoding | noncoding | noncoding |
| MSTRG. 230034. 1 |         | XLOC_238936 | 258 coding | noncoding | noncoding | noncoding |
| MSTRG. 230042. 1 |         | XLOC_238940 | 225 coding | coding    | noncoding | noncoding |
| MSTRG. 230046. 1 |         | XLOC_238942 | 244 coding | noncoding | noncoding | noncoding |
| MSTRG. 230060. 1 |         | XLOC_238952 | 282 coding | coding    | noncoding | noncoding |
| MSTRG. 230069. 1 |         | XLOC_238954 | 350 coding | noncoding | noncoding | noncoding |
| MSTRG. 230071. 1 |         | XLOC_238955 | 261 coding | noncoding | noncoding | noncoding |
| MSTRG. 230080. 1 |         | XLOC_238960 | 282 coding | noncoding | noncoding | noncoding |
| MSTRG. 230087. 1 |         | XLOC_238963 | 258 coding | noncoding | noncoding | noncoding |
| MSTRG. 230089. 1 |         | XLOC_238964 | 307 coding | coding    | noncoding | noncoding |
| MSTRG. 230090. 1 |         | XLOC_238965 | 247 coding | coding    | noncoding | noncoding |

|                  |              |             |             |           |           |           |
|------------------|--------------|-------------|-------------|-----------|-----------|-----------|
| MSTRG. 230102. 1 |              | XLOC_238972 | 279 coding  | noncoding | noncoding | noncoding |
| MSTRG. 230111. 1 | LOC107985714 | XLOC_238975 | 260 coding  | noncoding | noncoding | noncoding |
| MSTRG. 230124. 1 | ERVFC1       | XLOC_238984 | 249 coding  | noncoding | noncoding | noncoding |
| MSTRG. 230151. 1 |              | XLOC_238998 | 274 coding  | noncoding | noncoding | noncoding |
| MSTRG. 230154. 1 |              | XLOC_239001 | 277 coding  | noncoding | noncoding | noncoding |
| MSTRG. 230160. 1 |              | XLOC_239006 | 291 coding  | noncoding | noncoding | noncoding |
| MSTRG. 230166. 1 |              | XLOC_239011 | 229 coding  | noncoding | noncoding | noncoding |
| MSTRG. 230170. 1 |              | XLOC_239014 | 272 coding  | noncoding | noncoding | noncoding |
| MSTRG. 230173. 1 |              | XLOC_239015 | 308 coding  | noncoding | noncoding | noncoding |
| MSTRG. 230181. 1 |              | XLOC_239019 | 219 coding  | noncoding | noncoding | noncoding |
| MSTRG. 230197. 1 |              | XLOC_239025 | 265 coding  | noncoding | noncoding | noncoding |
| MSTRG. 230208. 1 | PCDH19       | XLOC_239029 | 303 coding  | noncoding | noncoding | noncoding |
| MSTRG. 230217. 1 | TSPAN6       | XLOC_239037 | 230 coding  | noncoding | noncoding | noncoding |
| MSTRG. 230221. 1 | SRPX2        | XLOC_239038 | 262 coding  | noncoding | noncoding | noncoding |
| MSTRG. 230228. 1 | SYTL4        | XLOC_239043 | 271 coding  | noncoding | noncoding | noncoding |
| MSTRG. 230262. 1 | TRMT2B       | XLOC_239053 | 365 coding  | noncoding | noncoding | noncoding |
| MSTRG. 230250. 1 |              | XLOC_239054 | 269 coding  | noncoding | noncoding | noncoding |
| MSTRG. 230277. 1 | CENPI        | XLOC_239059 | 239 coding  | noncoding | noncoding | noncoding |
| MSTRG. 230278. 1 | CENPI        | XLOC_239060 | 424 coding  | noncoding | noncoding | noncoding |
| MSTRG. 230283. 1 |              | XLOC_239067 | 228 coding  | noncoding | noncoding | noncoding |
| MSTRG. 230289. 1 | BTK          | XLOC_239070 | 290 coding  | noncoding | noncoding | noncoding |
| MSTRG. 230300. 1 |              | XLOC_239107 | 315 coding  | noncoding | noncoding | noncoding |
| MSTRG. 230357. 1 |              | XLOC_239125 | 242 coding  | noncoding | noncoding | noncoding |
| MSTRG. 230360. 1 |              | XLOC_239127 | 320 coding  | noncoding | noncoding | noncoding |
| MSTRG. 230361. 1 |              | XLOC_239128 | 302 coding  | noncoding | noncoding | noncoding |
| MSTRG. 230362. 1 |              | XLOC_239129 | 241 coding  | coding    | noncoding | noncoding |
| MSTRG. 230363. 1 |              | XLOC_239130 | 267 coding  | noncoding | noncoding | noncoding |
| MSTRG. 230384. 1 | NXF2B        | XLOC_239134 | 240 coding  | noncoding | noncoding | noncoding |
| MSTRG. 230387. 1 |              | XLOC_239137 | 281 coding  | noncoding | noncoding | noncoding |
| MSTRG. 230677. 5 | ARMCX5       | XLOC_239138 | 1696 coding | coding    | coding    | noncoding |
| NM_018476. 4     | BEX1         | XLOC_239200 | 795 coding  | coding    | coding    | coding    |
| MSTRG. 230403. 1 |              | XLOC_239203 | 254 coding  | noncoding | noncoding | noncoding |
| MSTRG. 230440. 1 | LOC107985661 | XLOC_239228 | 283 coding  | noncoding | noncoding | noncoding |
| MSTRG. 230564. 1 |              | XLOC_239271 | 299 coding  | noncoding | noncoding | noncoding |
| MSTRG. 230566. 1 |              | XLOC_239272 | 221 coding  | noncoding | noncoding | noncoding |
| MSTRG. 230623. 1 | IL1RAPL2     | XLOC_239282 | 370 coding  | noncoding | noncoding | noncoding |
| MSTRG. 230628. 1 | IL1RAPL2     | XLOC_239284 | 318 coding  | noncoding | noncoding | noncoding |
| MSTRG. 230630. 1 | IL1RAPL2     | XLOC_239286 | 276 coding  | noncoding | noncoding | noncoding |
| MSTRG. 230636. 1 | IL1RAPL2     | XLOC_239289 | 261 coding  | noncoding | noncoding | noncoding |
| MSTRG. 230589. 1 |              | XLOC_239310 | 238 coding  | coding    | noncoding | noncoding |
| MSTRG. 230591. 1 |              | XLOC_239311 | 234 coding  | noncoding | noncoding | noncoding |
| MSTRG. 230596. 1 |              | XLOC_239314 | 611 coding  | coding    | noncoding | noncoding |
| MSTRG. 230602. 1 |              | XLOC_239318 | 309 coding  | noncoding | noncoding | noncoding |

|                  |              |             |             |           |           |           |
|------------------|--------------|-------------|-------------|-----------|-----------|-----------|
| MSTRG. 230767. 1 | TBC1D8B      | XLOC_239327 | 252 coding  | noncoding | noncoding | noncoding |
| MSTRG. 230774. 1 |              | XLOC_239334 | 378 coding  | noncoding | noncoding | noncoding |
| MSTRG. 230857. 1 | FRMPD3       | XLOC_239372 | 288 coding  | noncoding | noncoding | noncoding |
| MSTRG. 230858. 1 | FRMPD3       | XLOC_239373 | 245 coding  | noncoding | noncoding | noncoding |
| MSTRG. 230886. 1 | TSC22D3      | XLOC_239384 | 2004 coding | coding    | coding    | coding    |
| MSTRG. 230899. 1 |              | XLOC_239401 | 215 coding  | coding    | noncoding | noncoding |
| XM_011531061. 1  | IRS4         | XLOC_239407 | 6607 coding | coding    | coding    | coding    |
| MSTRG. 230925. 1 |              | XLOC_239409 | 209 coding  | noncoding | noncoding | noncoding |
| MSTRG. 230942. 1 |              | XLOC_239411 | 250 coding  | noncoding | noncoding | noncoding |
| NM_012282. 4     | KCNE5        | XLOC_239428 | 1473 coding | noncoding | coding    | coding    |
| MSTRG. 230981. 1 |              | XLOC_239434 | 208 coding  | coding    | noncoding | noncoding |
| MSTRG. 231003. 1 |              | XLOC_239439 | 349 coding  | noncoding | noncoding | noncoding |
| MSTRG. 231005. 1 |              | XLOC_239440 | 294 coding  | noncoding | noncoding | noncoding |
| MSTRG. 231006. 1 |              | XLOC_239441 | 270 coding  | noncoding | noncoding | noncoding |
| MSTRG. 231016. 1 | CHRD1        | XLOC_239443 | 366 coding  | noncoding | noncoding | noncoding |
| MSTRG. 231012. 1 |              | XLOC_239446 | 267 coding  | noncoding | noncoding | noncoding |
| MSTRG. 231040. 1 | PAK3         | XLOC_239450 | 247 coding  | noncoding | noncoding | noncoding |
| MSTRG. 231017. 1 | CAPN6        | XLOC_239456 | 281 coding  | noncoding | noncoding | noncoding |
| MSTRG. 231027. 1 | DCX          | XLOC_239459 | 477 coding  | noncoding | noncoding | noncoding |
| MSTRG. 231021. 1 |              | XLOC_239464 | 223 coding  | noncoding | noncoding | noncoding |
| MSTRG. 231024. 1 |              | XLOC_239466 | 314 coding  | noncoding | noncoding | noncoding |
| MSTRG. 231030. 1 |              | XLOC_239467 | 261 coding  | noncoding | noncoding | noncoding |
| MSTRG. 231313. 1 | TRPC5        | XLOC_239477 | 286 coding  | noncoding | noncoding | noncoding |
| MSTRG. 231055. 1 | RTL4         | XLOC_239480 | 231 coding  | noncoding | noncoding | noncoding |
| MSTRG. 231058. 1 | RTL4         | XLOC_239481 | 221 coding  | noncoding | noncoding | noncoding |
| MSTRG. 231065. 1 | RTL4         | XLOC_239487 | 313 coding  | noncoding | noncoding | noncoding |
| MSTRG. 231068. 1 | RTL4         | XLOC_239489 | 292 coding  | noncoding | noncoding | noncoding |
| MSTRG. 231072. 1 | RTL4         | XLOC_239491 | 257 coding  | noncoding | noncoding | noncoding |
| MSTRG. 231073. 1 | RTL4         | XLOC_239492 | 291 coding  | noncoding | noncoding | noncoding |
| MSTRG. 231050. 1 |              | XLOC_239493 | 240 coding  | noncoding | noncoding | noncoding |
| MSTRG. 231074. 1 |              | XLOC_239495 | 207 coding  | noncoding | noncoding | noncoding |
| MSTRG. 231082. 1 |              | XLOC_239500 | 409 coding  | noncoding | noncoding | noncoding |
| MSTRG. 231099. 1 |              | XLOC_239509 | 306 coding  | noncoding | noncoding | noncoding |
| MSTRG. 231134. 1 | LOC101928437 | XLOC_239517 | 234 coding  | coding    | noncoding | noncoding |
| MSTRG. 231118. 1 |              | XLOC_239519 | 267 coding  | noncoding | noncoding | noncoding |
| MSTRG. 231141. 1 |              | XLOC_239523 | 229 coding  | noncoding | noncoding | noncoding |
| MSTRG. 231155. 1 |              | XLOC_239525 | 260 coding  | noncoding | noncoding | noncoding |
| MSTRG. 231171. 1 |              | XLOC_239535 | 267 coding  | noncoding | noncoding | noncoding |
| MSTRG. 231186. 1 | HTR2C        | XLOC_239537 | 303 coding  | noncoding | noncoding | noncoding |
| MSTRG. 231191. 1 | HTR2C        | XLOC_239539 | 297 coding  | noncoding | noncoding | noncoding |
| MSTRG. 231174. 1 |              | XLOC_239543 | 304 coding  | noncoding | noncoding | noncoding |
| MSTRG. 231178. 1 |              | XLOC_239546 | 245 coding  | noncoding | noncoding | noncoding |
| MSTRG. 231203. 1 | LRCH2        | XLOC_239550 | 278 coding  | noncoding | noncoding | noncoding |

|                  |              |             |             |           |           |           |
|------------------|--------------|-------------|-------------|-----------|-----------|-----------|
| MSTRG. 231205. 1 | LRCH2        | XLOC_239551 | 260 coding  | noncoding | noncoding | noncoding |
| MSTRG. 231210. 1 | LOC107985681 | XLOC_239552 | 261 coding  | noncoding | noncoding | noncoding |
| MSTRG. 231223. 1 | PLS3         | XLOC_239559 | 291 coding  | noncoding | noncoding | noncoding |
| MSTRG. 231242. 1 | DANT2        | XLOC_239567 | 330 coding  | noncoding | noncoding | noncoding |
| MSTRG. 231250. 1 |              | XLOC_239572 | 438 coding  | noncoding | noncoding | noncoding |
| MSTRG. 231252. 1 |              | XLOC_239573 | 311 coding  | noncoding | noncoding | noncoding |
| MSTRG. 231278. 1 |              | XLOC_239588 | 279 coding  | noncoding | noncoding | noncoding |
| MSTRG. 231282. 1 |              | XLOC_239592 | 295 coding  | noncoding | noncoding | noncoding |
| MSTRG. 231284. 1 |              | XLOC_239593 | 241 coding  | noncoding | noncoding | noncoding |
| MSTRG. 231322. 1 |              | XLOC_239596 | 205 coding  | noncoding | noncoding | noncoding |
| MSTRG. 231404. 1 | KLHL13       | XLOC_239612 | 279 coding  | coding    | noncoding | noncoding |
| MSTRG. 231427. 1 |              | XLOC_239624 | 304 coding  | noncoding | noncoding | noncoding |
| MSTRG. 231430. 1 |              | XLOC_239627 | 233 coding  | noncoding | noncoding | noncoding |
| MSTRG. 231443. 1 |              | XLOC_239639 | 246 coding  | noncoding | noncoding | noncoding |
| MSTRG. 231457. 1 | KIAA1210     | XLOC_239642 | 227 coding  | noncoding | noncoding | noncoding |
| MSTRG. 231470. 1 |              | XLOC_239645 | 288 coding  | noncoding | noncoding | noncoding |
| NR_028443. 1     | SLC25A5-AS1  | XLOC_239649 | 3088 coding | coding    | coding    | noncoding |
| MSTRG. 231495. 1 |              | XLOC_239652 | 259 coding  | noncoding | noncoding | noncoding |
| MSTRG. 231502. 1 |              | XLOC_239654 | 303 coding  | noncoding | noncoding | noncoding |
| MSTRG. 231506. 1 | CXorf56      | XLOC_239656 | 222 coding  | noncoding | noncoding | noncoding |
| XM_011531365. 2  | NKRF         | XLOC_239658 | 3887 coding | coding    | coding    | coding    |
| MSTRG. 231529. 1 |              | XLOC_239666 | 208 coding  | noncoding | noncoding | noncoding |
| MSTRG. 231537. 1 | RPL39        | XLOC_239673 | 290 coding  | noncoding | noncoding | noncoding |
| MSTRG. 231539. 1 | LOC107985694 | XLOC_239674 | 228 coding  | noncoding | noncoding | noncoding |
| MSTRG. 231524. 1 |              | XLOC_239678 | 259 coding  | noncoding | noncoding | noncoding |
| MSTRG. 231595. 1 |              | XLOC_239694 | 532 coding  | noncoding | noncoding | noncoding |
| MSTRG. 231601. 1 |              | XLOC_239698 | 378 coding  | noncoding | noncoding | noncoding |
| MSTRG. 231679. 1 | LOC112268302 | XLOC_239739 | 229 coding  | noncoding | noncoding | noncoding |
| MSTRG. 231658. 1 |              | XLOC_239750 | 272 coding  | noncoding | noncoding | noncoding |
| MSTRG. 231708. 1 |              | XLOC_239761 | 639 coding  | coding    | noncoding | noncoding |
| MSTRG. 231721. 1 |              | XLOC_239768 | 407 coding  | noncoding | noncoding | noncoding |
| MSTRG. 231723. 1 |              | XLOC_239769 | 226 coding  | noncoding | noncoding | noncoding |
| MSTRG. 231725. 1 |              | XLOC_239770 | 246 coding  | noncoding | noncoding | noncoding |
| MSTRG. 231736. 1 |              | XLOC_239776 | 278 coding  | coding    | noncoding | noncoding |
| MSTRG. 231758. 1 | GRIA3        | XLOC_239783 | 217 coding  | noncoding | noncoding | noncoding |
| MSTRG. 231800. 1 | THOC2        | XLOC_239793 | 425 coding  | noncoding | noncoding | noncoding |
| MSTRG. 231785. 1 |              | XLOC_239801 | 323 coding  | noncoding | noncoding | noncoding |
| MSTRG. 231788. 1 |              | XLOC_239803 | 339 coding  | noncoding | noncoding | noncoding |
| MSTRG. 231864. 4 | STAG2        | XLOC_239804 | 6061 coding | coding    | coding    | noncoding |
| MSTRG. 231808. 1 |              | XLOC_239810 | 245 coding  | coding    | noncoding | noncoding |
| MSTRG. 231809. 1 |              | XLOC_239811 | 303 coding  | noncoding | noncoding | noncoding |
| MSTRG. 231815. 1 |              | XLOC_239815 | 286 coding  | noncoding | noncoding | noncoding |
| MSTRG. 231825. 1 |              | XLOC_239837 | 265 coding  | noncoding | noncoding | noncoding |

|                |              |             |             |           |           |           |
|----------------|--------------|-------------|-------------|-----------|-----------|-----------|
| MSTRG_231846.1 |              | XLOC_239847 | 246 coding  | noncoding | noncoding | noncoding |
| MSTRG_231857.1 |              | XLOC_239853 | 291 coding  | noncoding | noncoding | noncoding |
| MSTRG_231862.1 |              | XLOC_239859 | 514 coding  | noncoding | noncoding | noncoding |
| MSTRG_231905.1 |              | XLOC_239860 | 307 coding  | noncoding | noncoding | noncoding |
| MSTRG_231902.1 |              | XLOC_239862 | 295 coding  | noncoding | noncoding | noncoding |
| MSTRG_231944.1 |              | XLOC_239882 | 414 coding  | noncoding | noncoding | noncoding |
| MSTRG_231962.1 |              | XLOC_239892 | 300 coding  | coding    | noncoding | noncoding |
| MSTRG_231977.1 |              | XLOC_239900 | 212 coding  | noncoding | noncoding | noncoding |
| MSTRG_231982.1 |              | XLOC_239903 | 309 coding  | noncoding | noncoding | noncoding |
| MSTRG_232003.1 | LOC107985698 | XLOC_239907 | 217 coding  | noncoding | noncoding | noncoding |
| MSTRG_232007.1 | LOC107985698 | XLOC_239910 | 254 coding  | noncoding | noncoding | noncoding |
| MSTRG_231988.1 |              | XLOC_239913 | 342 coding  | noncoding | noncoding | noncoding |
| MSTRG_232026.1 |              | XLOC_239917 | 222 coding  | noncoding | noncoding | noncoding |
| NM_017413.5    | APLN         | XLOC_239930 | 3224 coding | coding    | coding    | noncoding |
| MSTRG_232102.1 |              | XLOC_239941 | 228 coding  | noncoding | noncoding | noncoding |
| MSTRG_232105.1 |              | XLOC_239943 | 226 coding  | noncoding | noncoding | noncoding |
| MSTRG_232221.1 | FIRRE        | XLOC_240016 | 230 coding  | noncoding | noncoding | noncoding |
| MSTRG_232199.1 |              | XLOC_240017 | 335 coding  | noncoding | noncoding | noncoding |
| MSTRG_232202.1 |              | XLOC_240018 | 274 coding  | noncoding | noncoding | noncoding |
| MSTRG_232373.1 | MBNL3        | XLOC_240044 | 9836 coding | noncoding | coding    | coding    |
| XM_011531364.2 | MBNL3        | XLOC_240044 | 9730 coding | noncoding | coding    | coding    |
| MSTRG_232274.1 | GPC4         | XLOC_240058 | 319 coding  | noncoding | noncoding | noncoding |
| MSTRG_232310.1 | GPC3         | XLOC_240064 | 249 coding  | noncoding | noncoding | noncoding |
| MSTRG_232321.1 |              | XLOC_240073 | 268 coding  | noncoding | noncoding | noncoding |
| MSTRG_232330.1 |              | XLOC_240084 | 295 coding  | noncoding | noncoding | noncoding |
| MSTRG_232342.2 | HPRT1        | XLOC_240089 | 1205 coding | coding    | noncoding | noncoding |
| MSTRG_232377.1 | PLAC1        | XLOC_240099 | 379 coding  | noncoding | noncoding | noncoding |
| MSTRG_232414.1 | FAM122C      | XLOC_240108 | 249 coding  | noncoding | noncoding | noncoding |
| MSTRG_232389.1 |              | XLOC_240119 | 314 coding  | noncoding | noncoding | noncoding |
| MSTRG_232404.1 |              | XLOC_240125 | 225 coding  | noncoding | noncoding | noncoding |
| NR_110381.2    | ZNF75D       | XLOC_240130 | 2031 coding | coding    | coding    | noncoding |
| MSTRG_232463.1 | INTS6L-AS1   | XLOC_240141 | 3989 coding | coding    | noncoding | noncoding |
| MSTRG_232446.1 |              | XLOC_240143 | 262 coding  | noncoding | noncoding | noncoding |
| MSTRG_232448.1 |              | XLOC_240145 | 253 coding  | coding    | noncoding | noncoding |
| MSTRG_232499.1 |              | XLOC_240167 | 255 coding  | noncoding | noncoding | noncoding |
| XM_011531412.3 | ARHGEF6      | XLOC_240172 | 4923 coding | coding    | coding    | coding    |
| MSTRG_232541.1 | ARHGEF6      | XLOC_240181 | 293 coding  | noncoding | noncoding | noncoding |
| MSTRG_232594.1 |              | XLOC_240222 | 228 coding  | noncoding | noncoding | noncoding |
| MSTRG_232598.1 |              | XLOC_240224 | 272 coding  | noncoding | noncoding | noncoding |
| MSTRG_232603.1 |              | XLOC_240226 | 249 coding  | noncoding | noncoding | noncoding |
| MSTRG_232612.1 |              | XLOC_240229 | 310 coding  | noncoding | noncoding | noncoding |
| MSTRG_232614.1 |              | XLOC_240231 | 212 coding  | noncoding | noncoding | noncoding |
| MSTRG_232622.1 |              | XLOC_240234 | 285 coding  | noncoding | noncoding | noncoding |

|                  |              |             |             |           |           |           |
|------------------|--------------|-------------|-------------|-----------|-----------|-----------|
| MSTRG. 233019. 1 | FGF13        | XLOC_240241 | 262 coding  | coding    | noncoding | noncoding |
| MSTRG. 233026. 1 | FGF13        | XLOC_240242 | 260 coding  | coding    | noncoding | noncoding |
| MSTRG. 233047. 1 | FGF13        | XLOC_240246 | 243 coding  | noncoding | noncoding | noncoding |
| MSTRG. 232638. 1 |              | XLOC_240258 | 271 coding  | noncoding | noncoding | noncoding |
| MSTRG. 232644. 1 |              | XLOC_240283 | 299 coding  | noncoding | noncoding | noncoding |
| MSTRG. 232646. 1 |              | XLOC_240285 | 312 coding  | noncoding | noncoding | noncoding |
| MSTRG. 232653. 1 |              | XLOC_240290 | 280 coding  | noncoding | noncoding | noncoding |
| MSTRG. 232663. 1 |              | XLOC_240296 | 289 coding  | noncoding | noncoding | noncoding |
| MSTRG. 232668. 1 | LINC00632    | XLOC_240298 | 249 coding  | noncoding | noncoding | noncoding |
| MSTRG. 232674. 1 |              | XLOC_240304 | 232 coding  | noncoding | noncoding | noncoding |
| MSTRG. 232688. 1 |              | XLOC_240316 | 220 coding  | noncoding | noncoding | noncoding |
| MSTRG. 232707. 1 |              | XLOC_240322 | 232 coding  | noncoding | noncoding | noncoding |
| MSTRG. 232709. 1 |              | XLOC_240323 | 274 coding  | coding    | noncoding | noncoding |
| MSTRG. 232724. 1 |              | XLOC_240333 | 262 coding  | coding    | noncoding | noncoding |
| MSTRG. 232740. 1 |              | XLOC_240338 | 270 coding  | noncoding | noncoding | noncoding |
| MSTRG. 232748. 1 |              | XLOC_240344 | 232 coding  | noncoding | noncoding | noncoding |
| MSTRG. 232764. 1 |              | XLOC_240356 | 405 coding  | noncoding | noncoding | noncoding |
| MSTRG. 232766. 1 |              | XLOC_240358 | 318 coding  | noncoding | noncoding | noncoding |
| MSTRG. 232799. 1 |              | XLOC_240374 | 226 coding  | noncoding | noncoding | noncoding |
| MSTRG. 232815. 1 |              | XLOC_240383 | 300 coding  | coding    | noncoding | noncoding |
| MSTRG. 232838. 1 | SPANXN1      | XLOC_240394 | 298 coding  | noncoding | noncoding | noncoding |
| MSTRG. 232843. 1 |              | XLOC_240397 | 270 coding  | noncoding | noncoding | noncoding |
| MSTRG. 232845. 1 |              | XLOC_240399 | 272 coding  | noncoding | noncoding | noncoding |
| MSTRG. 232849. 1 |              | XLOC_240402 | 208 coding  | noncoding | noncoding | noncoding |
| MSTRG. 232852. 1 |              | XLOC_240404 | 292 coding  | noncoding | noncoding | noncoding |
| MSTRG. 232854. 1 |              | XLOC_240405 | 305 coding  | noncoding | noncoding | noncoding |
| MSTRG. 232860. 1 |              | XLOC_240417 | 261 coding  | noncoding | noncoding | noncoding |
| MSTRG. 232873. 1 |              | XLOC_240421 | 257 coding  | coding    | noncoding | noncoding |
| MSTRG. 232882. 1 |              | XLOC_240424 | 228 coding  | noncoding | noncoding | noncoding |
| MSTRG. 232949. 1 |              | XLOC_240451 | 258 coding  | noncoding | noncoding | noncoding |
| MSTRG. 232945. 1 |              | XLOC_240453 | 287 coding  | noncoding | noncoding | noncoding |
| MSTRG. 232947. 1 |              | XLOC_240454 | 306 coding  | noncoding | noncoding | noncoding |
| MSTRG. 232972. 1 | LOC105373349 | XLOC_240456 | 283 coding  | noncoding | noncoding | noncoding |
| MSTRG. 232982. 1 | FMR1NB       | XLOC_240464 | 232 coding  | noncoding | noncoding | noncoding |
| MSTRG. 232990. 1 |              | XLOC_240470 | 298 coding  | coding    | noncoding | noncoding |
| MSTRG. 232991. 1 |              | XLOC_240471 | 400 coding  | noncoding | noncoding | noncoding |
| MSTRG. 232997. 1 |              | XLOC_240474 | 241 coding  | noncoding | noncoding | noncoding |
| MSTRG. 233089. 2 | AFF2         | XLOC_240480 | 1408 coding | coding    | coding    | noncoding |
| MSTRG. 233089. 4 | AFF2         | XLOC_240480 | 1178 coding | coding    | noncoding | noncoding |
| MSTRG. 233089. 6 | AFF2         | XLOC_240480 | 1216 coding | coding    | noncoding | noncoding |
| MSTRG. 233224. 3 | MTM1         | XLOC_240561 | 1390 coding | coding    | noncoding | noncoding |
| MSTRG. 233279. 1 | PASD1        | XLOC_240595 | 284 coding  | noncoding | noncoding | noncoding |
| MSTRG. 233296. 1 | LOC105373369 | XLOC_240606 | 238 coding  | noncoding | noncoding | noncoding |

|                   |              |             |             |           |           |           |
|-------------------|--------------|-------------|-------------|-----------|-----------|-----------|
| MSTRG. 233298. 1  | LOC105373369 | XLOC_240608 | 251 coding  | noncoding | noncoding | noncoding |
| MSTRG. 233317. 1  | GABRA3       | XLOC_240613 | 260 coding  | noncoding | noncoding | noncoding |
| MSTRG. 233394. 1  |              | XLOC_240654 | 235 coding  | noncoding | coding    | noncoding |
| MSTRG. 233431. 1  | PLXNB3       | XLOC_240684 | 247 coding  | noncoding | noncoding | noncoding |
| MSTRG. 233459. 5  | IDH3G        | XLOC_240687 | 715 coding  | coding    | coding    | coding    |
| MSTRG. 233466. 1  | ARHGAP4      | XLOC_240692 | 256 coding  | noncoding | noncoding | noncoding |
| MSTRG. 233490. 1  | MECP2        | XLOC_240703 | 210 coding  | noncoding | noncoding | noncoding |
| NR_027402. 1      | FAM223B      | XLOC_240738 | 713 coding  | noncoding | coding    | coding    |
| MSTRG. 233564. 1  | GAB3         | XLOC_240743 | 311 coding  | noncoding | noncoding | noncoding |
| MSTRG. 233598. 1  |              | XLOC_240782 | 261 coding  | noncoding | noncoding | noncoding |
| NM_002183. 4_1    | IL3RA        | XLOC_240862 | 1541 coding | coding    | coding    | coding    |
| MSTRG. 233684. 1  |              | XLOC_240889 | 231 coding  | noncoding | noncoding | noncoding |
| MSTRG. 233746. 1  |              | XLOC_240970 | 259 coding  | noncoding | noncoding | noncoding |
| MSTRG. 234036. 15 | UTY          | XLOC_240989 | 7935 coding | coding    | coding    | coding    |
| MSTRG. 233656. 1  | P2RY8        | XLOC_241199 | 245 coding  | noncoding | noncoding | noncoding |
| NR_047641. 1      | UTY          | XLOC_241317 | 6594 coding | coding    | coding    | coding    |
| MSTRG. 233940. 1  |              | XLOC_241404 | 338 coding  | noncoding | noncoding | noncoding |
| MSTRG. 233941. 1  |              | XLOC_241405 | 301 coding  | noncoding | noncoding | noncoding |
| MSTRG. 234240. 18 | TRNT         | XLOC_241522 | 2585 coding | coding    | noncoding | coding    |
| MSTRG. 234235. 1  |              | XLOC_241541 | 241 coding  | noncoding | noncoding | noncoding |
| MSTRG. 234258. 1  | LOC105379271 | XLOC_241549 | 307 coding  | noncoding | noncoding | noncoding |
| MSTRG. 234238. 1  |              | XLOC_241558 | 344 coding  | noncoding | noncoding | noncoding |
| MSTRG. 234263. 1  |              | XLOC_241575 | 471 coding  | noncoding | noncoding | noncoding |
| MSTRG. 234264. 1  |              | XLOC_241576 | 278 coding  | noncoding | noncoding | noncoding |
| MSTRG. 234265. 1  |              | XLOC_241577 | 238 coding  | coding    | noncoding | noncoding |
| MSTRG. 234280. 1  |              | XLOC_241589 | 321 coding  | coding    | noncoding | noncoding |
| NR_027420. 1      | LOC389834    | XLOC_241595 | 8205 coding | noncoding | coding    | coding    |
| MSTRG. 234281. 1  |              | XLOC_241599 | 286 coding  | coding    | noncoding | noncoding |
| NM_005007. 4_1    | NFKBIL1      | XLOC_241712 | 1451 coding | coding    | coding    | coding    |
| MSTRG. 234497. 1  |              | XLOC_241791 | 266 coding  | noncoding | noncoding | noncoding |
| NM_014234. 5_1    | HSD17B8      | XLOC_241798 | 977 coding  | coding    | coding    | coding    |
| NM_052923. 2_1    | ZBED9        | XLOC_241812 | 5935 coding | coding    | coding    | coding    |
| MSTRG. 234328. 1  |              | XLOC_241870 | 292 coding  | noncoding | noncoding | noncoding |
| MSTRG. 234375. 5  | HCG26        | XLOC_241907 | 4713 coding | noncoding | coding    | coding    |
| NM_006411. 4_2    | AGPAT1       | XLOC_241952 | 2196 coding | coding    | coding    | coding    |
| MSTRG. 234541. 1  |              | XLOC_242007 | 364 coding  | noncoding | coding    | noncoding |
| MSTRG. 234546. 1  | LOC105379417 | XLOC_242026 | 303 coding  | noncoding | noncoding | noncoding |
| MSTRG. 234549. 1  |              | XLOC_242028 | 243 coding  | noncoding | noncoding | noncoding |
| MSTRG. 234565. 3  | LOC283788    | XLOC_242036 | 1739 coding | coding    | noncoding | noncoding |
| NR_038958. 1      | LOC100507412 | XLOC_242058 | 2945 coding | noncoding | noncoding | noncoding |
| MSTRG. 234635. 8  | RNA45SN5     | XLOC_242059 | 1631 coding | noncoding | coding    | noncoding |
| MSTRG. 234635. 9  | RNA45SN5     | XLOC_242059 | 3471 coding | noncoding | coding    | noncoding |
| MSTRG. 234635. 7  | RNA45SN5     | XLOC_242059 | 3497 coding | noncoding | coding    | noncoding |

|                   |                 |             |              |           |           |           |
|-------------------|-----------------|-------------|--------------|-----------|-----------|-----------|
| MSTRG. 234634. 15 | LOC112268313    | XLOC_242063 | 582 coding   | noncoding | coding    | noncoding |
| MSTRG. 234634. 16 | LOC100507412    | XLOC_242063 | 5258 coding  | noncoding | coding    | noncoding |
| MSTRG. 234634. 24 | LOC112268313    | XLOC_242063 | 2509 coding  | noncoding | coding    | noncoding |
| MSTRG. 234634. 23 | LOC100507412    | XLOC_242063 | 7246 coding  | noncoding | coding    | noncoding |
| MSTRG. 234578. 1  |                 | XLOC_242083 | 542 coding   | noncoding | noncoding | noncoding |
| NR_149088. 1_1    | LINC02569       | XLOC_242156 | 1214 coding  | noncoding | coding    | noncoding |
| NM_006295. 3_1    | VAR5            | XLOC_242272 | 4111 coding  | coding    | coding    | coding    |
| NM_006411. 4_1    | AGPAT1          | XLOC_242283 | 2196 coding  | coding    | coding    | coding    |
| MSTRG. 234747. 3  | HLA-A           | XLOC_242333 | 1545 coding  | coding    | coding    | coding    |
| NM_001297652. 1_3 | DDR1            | XLOC_242371 | 3903 coding  | coding    | coding    | coding    |
| MSTRG. 234804. 3  | HLA-C           | XLOC_242383 | 466 coding   | coding    | noncoding | noncoding |
| NM_007293. 2_1    | C4A             | XLOC_242434 | 5426 coding  | coding    | coding    | coding    |
| NM_001002029. 3_2 | C4B             | XLOC_242436 | 5427 coding  | coding    | coding    | coding    |
| NM_022551. 3_2    | RPS18           | XLOC_242478 | 549 coding   | coding    | coding    | coding    |
| MSTRG. 234763. 2  | HLA-E           | XLOC_242525 | 5150 coding  | coding    | coding    | noncoding |
| MSTRG. 234924. 1  | RPS18           | XLOC_242635 | 934 coding   | coding    | noncoding | noncoding |
| MSTRG. 234941. 1  | GABBR1          | XLOC_242669 | 367 coding   | noncoding | noncoding | noncoding |
| MSTRG. 235079. 2  | TAP2            | XLOC_242795 | 2523 coding  | coding    | noncoding | coding    |
| NM_001199456. 1_3 | BRD2            | XLOC_242808 | 3210 coding  | coding    | coding    | coding    |
| NM_014234. 5_3    | HSD17B8         | XLOC_242821 | 977 coding   | coding    | coding    | coding    |
| MSTRG. 235130. 4  | HLA-A           | XLOC_242991 | 2122 coding  | coding    | coding    | coding    |
| MSTRG. 235130. 5  | HLA-A           | XLOC_242991 | 743 coding   | coding    | noncoding | noncoding |
| NR_026791. 1_3    | HCG27           | XLOC_243032 | 1720 coding  | noncoding | coding    | noncoding |
| MSTRG. 235179. 8  | HLA-C           | XLOC_243033 | 1564 coding  | coding    | coding    | coding    |
| NM_014234. 5_4    | HSD17B8         | XLOC_243129 | 977 coding   | coding    | coding    | coding    |
| MSTRG. 235182. 3  | HLA-C           | XLOC_243213 | 1538 coding  | coding    | coding    | coding    |
| MSTRG. 235172. 1  |                 | XLOC_243221 | 231 coding   | noncoding | noncoding | noncoding |
| NM_006295. 3_4    | VAR5            | XLOC_243247 | 4111 coding  | coding    | coding    | coding    |
| MSTRG. 235404. 1  | CCHCR1          | XLOC_243392 | 268 coding   | coding    | noncoding | noncoding |
| NR_160952. 1_4    | SNHG32          | XLOC_243440 | 602 coding   | coding    | noncoding | noncoding |
| NM_007293. 2_2    | C4A             | XLOC_243449 | 5426 coding  | coding    | coding    | coding    |
| NM_014234. 5_5    | HSD17B8         | XLOC_243495 | 977 coding   | coding    | coding    | coding    |
| NM_001365276. 2_6 | TNXB            | XLOC_243626 | 10161 coding | coding    | noncoding | coding    |
| NM_006411. 4_5    | AGPAT1          | XLOC_243628 | 2196 coding  | coding    | coding    | coding    |
| NR_103864. 1_7    | ZNRD1           | XLOC_243717 | 661 coding   | coding    | noncoding | noncoding |
| MSTRG. 235579. 1  |                 | XLOC_243866 | 302 coding   | noncoding | noncoding | noncoding |
| NR_037853. 1_7    | ATP6V1G2-DDX39B | XLOC_243945 | 2305 coding  | coding    | coding    | coding    |
| NM_006411. 4_6    | AGPAT1          | XLOC_243982 | 2196 coding  | coding    | coding    | coding    |
| MSTRG. 235757. 1  |                 | XLOC_243996 | 230 coding   | coding    | noncoding | noncoding |
| MSTRG. 235825. 5  | YTHDC1          | XLOC_244027 | 3231 coding  | coding    | noncoding | noncoding |
| MSTRG. 235850. 1  |                 | XLOC_244079 | 266 coding   | noncoding | noncoding | noncoding |
| MSTRG. 235901. 1  | LOC105379854    | XLOC_244121 | 222 coding   | noncoding | noncoding | noncoding |
| MSTRG. 235895. 1  | LOC107987363    | XLOC_244127 | 543 coding   | noncoding | noncoding | noncoding |

|                   |              |             |              |           |           |           |
|-------------------|--------------|-------------|--------------|-----------|-----------|-----------|
| MSTRG. 235910. 1  |              | XLOC_244138 | 207 coding   | noncoding | noncoding | noncoding |
| MSTRG. 235945. 1  | LOC102724250 | XLOC_244177 | 260 coding   | noncoding | noncoding | noncoding |
| MSTRG. 235936. 1  |              | XLOC_244179 | 262 coding   | noncoding | noncoding | noncoding |
| MSTRG. 235954. 1  |              | XLOC_244187 | 256 coding   | noncoding | noncoding | noncoding |
| MSTRG. 235968. 1  |              | XLOC_244214 | 247 coding   | noncoding | noncoding | noncoding |
| MSTRG. 235987. 1  |              | XLOC_244230 | 289 coding   | noncoding | noncoding | noncoding |
| NR_146117. 1      | RNA45SN4     | XLOC_244292 | 13373 coding | noncoding | noncoding | noncoding |
| MSTRG. 236073. 9  | RNA45SN4     | XLOC_244292 | 4300 coding  | noncoding | coding    | noncoding |
| MSTRG. 236073. 14 | RNA45SN4     | XLOC_244292 | 4888 coding  | noncoding | coding    | noncoding |
| MSTRG. 236078. 1  |              | XLOC_244295 | 1711 coding  | noncoding | noncoding | noncoding |
| MSTRG. 236074. 19 |              | XLOC_244298 | 919 coding   | noncoding | coding    | noncoding |
| XR_002958855. 1   | LOC102724621 | XLOC_244299 | 2343 coding  | coding    | coding    | coding    |
| MSTRG. 236020. 1  | LOC102724788 | XLOC_244305 | 290 coding   | noncoding | noncoding | noncoding |
| MSTRG. 236048. 1  |              | XLOC_244339 | 373 coding   | noncoding | noncoding | noncoding |
| MSTRG. 236056. 1  |              | XLOC_244344 | 291 coding   | noncoding | noncoding | noncoding |
| MSTRG. 236039. 1  |              | XLOC_244345 | 241 coding   | noncoding | noncoding | noncoding |
| MSTRG. 236047. 1  |              | XLOC_244348 | 240 coding   | noncoding | noncoding | noncoding |
| MSTRG. 236067. 1  |              | XLOC_244362 | 438 coding   | noncoding | coding    | noncoding |
| MSTRG. 236084. 1  |              | XLOC_244377 | 295 coding   | coding    | noncoding | noncoding |
| MSTRG. 236099. 1  |              | XLOC_244383 | 252 coding   | coding    | noncoding | noncoding |
| MSTRG. 236109. 1  |              | XLOC_244394 | 291 coding   | noncoding | noncoding | noncoding |
| MSTRG. 236108. 1  |              | XLOC_244395 | 291 coding   | noncoding | noncoding | noncoding |
| MSTRG. 236130. 1  | LOC102723347 | XLOC_244411 | 262 coding   | noncoding | noncoding | noncoding |
| MSTRG. 236131. 1  | LOC102723347 | XLOC_244412 | 304 coding   | noncoding | coding    | noncoding |
| MSTRG. 236145. 1  |              | XLOC_244424 | 1412 coding  | noncoding | noncoding | noncoding |
| MSTRG. 236151. 1  |              | XLOC_244427 | 624 coding   | noncoding | noncoding | noncoding |
| MSTRG. 236140. 1  |              | XLOC_244431 | 525 coding   | noncoding | coding    | noncoding |
| MSTRG. 236146. 1  |              | XLOC_244436 | 787 coding   | noncoding | coding    | noncoding |
| XR_002958858. 1   | LOC112268317 | XLOC_244441 | 2427 coding  | coding    | noncoding | coding    |
| MSTRG. 236143. 1  |              | XLOC_244447 | 460 coding   | coding    | noncoding | noncoding |
| XR_002958865. 1   | LOC101929819 | XLOC_244448 | 3483 coding  | noncoding | noncoding | coding    |
| XR_001756170. 1   | LOC107987399 | XLOC_244450 | 647 coding   | coding    | noncoding | noncoding |
| MSTRG. 236159. 1  |              | XLOC_244452 | 258 coding   | noncoding | noncoding | noncoding |
| MSTRG. 236165. 1  |              | XLOC_244463 | 277 coding   | noncoding | noncoding | noncoding |
| MSTRG. 236187. 1  |              | XLOC_244481 | 436 coding   | noncoding | noncoding | noncoding |
| MSTRG. 236192. 1  |              | XLOC_244485 | 288 coding   | noncoding | noncoding | noncoding |
| MSTRG. 236262. 1  |              | XLOC_244633 | 762 coding   | noncoding | coding    | noncoding |
| MSTRG. 236286. 1  |              | XLOC_244662 | 287 coding   | noncoding | noncoding | noncoding |
| MSTRG. 236287. 1  |              | XLOC_244666 | 277 coding   | noncoding | noncoding | noncoding |
| MSTRG. 236318. 1  | MUC4         | XLOC_244708 | 254 coding   | noncoding | noncoding | noncoding |
| MSTRG. 236355. 1  |              | XLOC_244751 | 284 coding   | noncoding | noncoding | noncoding |
| MSTRG. 236411. 2  | FAM157A      | XLOC_244763 | 1775 coding  | noncoding | noncoding | noncoding |
| MSTRG. 236436. 1  | LOC100128340 | XLOC_244787 | 251 coding   | noncoding | noncoding | noncoding |

|                   |              |             |             |           |           |           |
|-------------------|--------------|-------------|-------------|-----------|-----------|-----------|
| MSTRG. 236439. 1  |              | XLOC_244788 | 293 coding  | noncoding | noncoding | noncoding |
| NR_104614. 1_1    | LOC100506688 | XLOC_244828 | 3517 coding | noncoding | coding    | coding    |
| NM_016568. 3_1    | RXFP3        | XLOC_244846 | 2533 coding | coding    | coding    | coding    |
| NM_001286380. 1_1 | FAM120B      | XLOC_244868 | 5207 coding | noncoding | coding    | coding    |
| MSTRG. 236489. 1  |              | XLOC_244891 | 232 coding  | noncoding | noncoding | noncoding |
| MSTRG. 236575. 1  | PTPRK        | XLOC_244918 | 260 coding  | noncoding | noncoding | noncoding |
| MSTRG. 236573. 1  | PTPRK        | XLOC_244961 | 237 coding  | noncoding | noncoding | noncoding |
| NM_031905. 5_1    | ARMC10       | XLOC_244992 | 1845 coding | coding    | coding    | coding    |
| MSTRG. 236614. 1  | LOC100133091 | XLOC_245010 | 270 coding  | noncoding | noncoding | noncoding |
| NM_001351597. 1_1 | SPDYE16      | XLOC_245014 | 939 coding  | coding    | coding    | coding    |
| NM_004668. 3_1    | MGAM         | XLOC_245019 | 4199 coding | coding    | coding    | coding    |
| TRBV3-1_1         | TRBV3-1      | XLOC_245023 | 344 coding  | coding    | coding    | noncoding |
| TRBV12-4_1        | TRBV12-4     | XLOC_245023 | 347 coding  | coding    | coding    | noncoding |
| MSTRG. 236740. 81 | TRBJ1-5      | XLOC_245023 | 897 coding  | coding    | coding    | noncoding |
| MSTRG. 236628. 5  | EPHB6        | XLOC_245101 | 422 coding  | coding    | noncoding | noncoding |
| MSTRG. 236848. 1  | TRBV1        | XLOC_245149 | 275 coding  | noncoding | noncoding | noncoding |
| MSTRG. 236856. 18 | TRBV1        | XLOC_245152 | 741 coding  | coding    | noncoding | noncoding |
| NM_018646. 6_1    | TRPV6        | XLOC_245155 | 2905 coding | coding    | coding    | coding    |
| NM_139021. 3_1    | MAPK15       | XLOC_245221 | 1871 coding | coding    | coding    | coding    |
| NM_001317783. 2_1 | TSTA3        | XLOC_245232 | 1391 coding | coding    | coding    | coding    |
| MSTRG. 236713. 2  | MYOM2        | XLOC_245279 | 240 coding  | noncoding | noncoding | noncoding |
| MSTRG. 236714. 1  | MYOM2        | XLOC_245280 | 259 coding  | noncoding | noncoding | noncoding |
| MSTRG. 236723. 2  | MYOM2        | XLOC_245309 | 1258 coding | coding    | coding    | coding    |
| MSTRG. 236891. 1  |              | XLOC_245369 | 642 coding  | noncoding | noncoding | noncoding |
| MSTRG. 236908. 8  | NAP1L4       | XLOC_245388 | 3808 coding | coding    | noncoding | coding    |
| MSTRG. 236908. 10 | NAP1L4       | XLOC_245388 | 4883 coding | coding    | noncoding | noncoding |
| MSTRG. 236943. 1  |              | XLOC_245442 | 234 coding  | noncoding | noncoding | noncoding |
| NR_153414. 1_1    | OVOS2        | XLOC_245443 | 5725 coding | coding    | coding    | coding    |
| MSTRG. 236966. 1  | SPACA7       | XLOC_245473 | 272 coding  | noncoding | noncoding | noncoding |
| MSTRG. 236993. 7  | TC2N         | XLOC_245497 | 3459 coding | coding    | noncoding | noncoding |
| XM_017030199. 1   | LOC107987211 | XLOC_245521 | 3166 coding | noncoding | coding    | coding    |
| NM_175748. 4_1    | UBR7         | XLOC_245578 | 3494 coding | coding    | coding    | coding    |
| NM_182985. 5_1    | TRIM69       | XLOC_245666 | 1735 coding | coding    | coding    | coding    |
| XR_951899. 3      | LOC105370926 | XLOC_245687 | 615 coding  | coding    | noncoding | noncoding |
| MSTRG. 237162. 2  | RPS17        | XLOC_245690 | 545 coding  | coding    | noncoding | noncoding |
| NM_001322400. 1   | GOLGA6L10    | XLOC_245691 | 1743 coding | coding    | coding    | coding    |
| MSTRG. 237133. 1  | GOLGA6L10    | XLOC_245692 | 290 coding  | noncoding | noncoding | noncoding |
| MSTRG. 237135. 1  | GOLGA6L19    | XLOC_245696 | 290 coding  | noncoding | noncoding | noncoding |
| NM_001021. 6_1    | RPS17        | XLOC_245711 | 488 coding  | coding    | coding    | coding    |
| MSTRG. 237174. 1  |              | XLOC_245720 | 240 coding  | noncoding | noncoding | noncoding |
| NM_173474. 4_1    | NTAN1        | XLOC_245725 | 1210 coding | coding    | coding    | coding    |
| MSTRG. 237222. 1  | LOC107984869 | XLOC_245745 | 250 coding  | noncoding | noncoding | noncoding |
| NM_004996. 4_1    | ABCC1        | XLOC_245746 | 6505 coding | coding    | coding    | coding    |

|                   |              |             |              |           |           |           |
|-------------------|--------------|-------------|--------------|-----------|-----------|-----------|
| MSTRG. 237225. 1  | ABCC1        | XLOC_245747 | 252 coding   | noncoding | noncoding | noncoding |
| XR_002958906. 1   | LOC112268324 | XLOC_245781 | 6783 coding  | coding    | coding    | coding    |
| MSTRG. 237188. 1  | MPV17L       | XLOC_245793 | 289 coding   | noncoding | noncoding | noncoding |
| MSTRG. 237269. 4  | NMRAL1       | XLOC_245822 | 743 coding   | coding    | coding    | noncoding |
| MSTRG. 237296. 1  | B3GNTL1      | XLOC_245868 | 346 coding   | noncoding | noncoding | noncoding |
| MSTRG. 237322. 1  |              | XLOC_245882 | 607 coding   | noncoding | noncoding | noncoding |
| NM_001291462. 2_1 | TBC1D3G      | XLOC_245908 | 2065 coding  | coding    | coding    | coding    |
| MSTRG. 237403. 1  | ACACA        | XLOC_245944 | 503 coding   | noncoding | noncoding | noncoding |
| NM_001166105. 3_1 | TADA2A       | XLOC_245947 | 4236 coding  | coding    | coding    | coding    |
| NM_001291466. 1_1 | TBC1D3E      | XLOC_245959 | 2063 coding  | coding    | coding    | coding    |
| NM_001199417. 2_1 | ARHGAP23     | XLOC_245964 | 5911 coding  | coding    | coding    | coding    |
| NR_027921. 3_1    | CCL15-CCL14  | XLOC_245985 | 1471 coding  | coding    | coding    | noncoding |
| NM_001145436. 2_1 | LSS          | XLOC_246134 | 4309 coding  | coding    | coding    | coding    |
| MSTRG. 237542. 1  |              | XLOC_246162 | 252 coding   | noncoding | noncoding | noncoding |
| NM_152673. 3      | MUC20        | XLOC_246350 | 2078 coding  | noncoding | coding    | coding    |
| MSTRG. 237624. 1  |              | XLOC_246368 | 818 coding   | noncoding | noncoding | noncoding |
| MSTRG. 237618. 9  | LOC102725009 | XLOC_246412 | 1575 coding  | coding    | coding    | noncoding |
| MSTRG. 237677. 2  | MCCC2        | XLOC_246430 | 547 coding   | coding    | noncoding | noncoding |
| MSTRG. 237699. 8  |              | XLOC_246442 | 6372 coding  | noncoding | coding    | coding    |
| MSTRG. 237699. 13 |              | XLOC_246442 | 3664 coding  | noncoding | noncoding | coding    |
| NM_005961. 3_2    | MUC6         | XLOC_246464 | 8016 coding  | coding    | noncoding | coding    |
| MSTRG. 237703. 1  | MUC6         | XLOC_246465 | 224 coding   | noncoding | noncoding | noncoding |
| NM_001170820. 4_1 | IFITM10      | XLOC_246478 | 3044 coding  | noncoding | coding    | coding    |
| NM_199357. 2_3    | ARHGAP11A    | XLOC_246607 | 2485 coding  | coding    | coding    | coding    |
| NM_001368078. 1_3 | GOLGA8G      | XLOC_246622 | 5276 coding  | coding    | coding    | coding    |
| XR_952500. 3      | LOC105371800 | XLOC_246755 | 3562 coding  | noncoding | noncoding | noncoding |
| MSTRG. 237960. 1  |              | XLOC_246913 | 310 coding   | noncoding | noncoding | noncoding |
| MSTRG. 237988. 1  | KIR2DS2      | XLOC_246983 | 257 coding   | noncoding | noncoding | noncoding |
| NM_152673. 3_1    | MUC20        | XLOC_247008 | 2078 coding  | noncoding | coding    | coding    |
| NM_018406. 7_5    | MUC4         | XLOC_247021 | 16591 coding | coding    | noncoding | coding    |
| NM_001291833. 1   | MUC20        | XLOC_247024 | 2066 coding  | noncoding | coding    | coding    |
| MSTRG. 238002. 1  | MUC20        | XLOC_247031 | 248 coding   | noncoding | noncoding | noncoding |
| NR_145325. 1_9    | NLRP2        | XLOC_247078 | 3777 coding  | coding    | coding    | coding    |
| NM_001083899. 2_9 | GP6          | XLOC_247118 | 2268 coding  | coding    | coding    | coding    |
| NM_001324475. 2_1 | INTS3        | XLOC_247120 | 4911 coding  | coding    | coding    | coding    |
| MSTRG. 238071. 3  | SCAMP3       | XLOC_247135 | 854 coding   | coding    | noncoding | noncoding |
| NM_001005741. 3_1 | GBA          | XLOC_247139 | 2344 coding  | coding    | coding    | coding    |
| NM_207365. 4_1    | AADACL2      | XLOC_247179 | 3219 coding  | coding    | coding    | coding    |
| XR_952059. 2      | LOC105377507 | XLOC_247181 | 4820 coding  | noncoding | noncoding | noncoding |
| NM_002538. 4_1    | OCLN         | XLOC_247198 | 6186 coding  | coding    | coding    | coding    |
| MSTRG. 238123. 4  | NAIP         | XLOC_247265 | 2910 coding  | coding    | noncoding | noncoding |
| MSTRG. 238125. 1  |              | XLOC_247266 | 672 coding   | noncoding | noncoding | noncoding |
| MSTRG. 238207. 2  | BDP1         | XLOC_247294 | 3037 coding  | coding    | coding    | noncoding |

|                   |              |             |             |           |           |           |
|-------------------|--------------|-------------|-------------|-----------|-----------|-----------|
| MSTRG. 238212. 1  |              | XLOC_247311 | 222 coding  | noncoding | noncoding | noncoding |
| MSTRG. 238226. 1  |              | XLOC_247330 | 278 coding  | noncoding | noncoding | noncoding |
| MSTRG. 238246. 1  | ARMC4P1      | XLOC_247341 | 254 coding  | noncoding | noncoding | noncoding |
| NM_001320862. 2_1 | ALOX5        | XLOC_247348 | 2557 coding | coding    | coding    | coding    |
| MSTRG. 238250. 1  |              | XLOC_247359 | 243 coding  | noncoding | coding    | noncoding |
| NM_001368078. 1_2 | GOLGA8G      | XLOC_247380 | 5276 coding | coding    | coding    | coding    |
| MSTRG. 238275. 1  | CES1         | XLOC_247395 | 315 coding  | noncoding | noncoding | noncoding |
| MSTRG. 238278. 1  |              | XLOC_247403 | 314 coding  | noncoding | noncoding | noncoding |
| MSTRG. 238292. 1  |              | XLOC_247409 | 388 coding  | noncoding | noncoding | noncoding |
| XR_952121. 3      | LOC101929823 | XLOC_247430 | 2362 coding | coding    | noncoding | coding    |
| NM_001039535. 3_1 | SKA1         | XLOC_247453 | 2894 coding | coding    | coding    | coding    |
| MSTRG. 238397. 14 | APOBEC3A_B   | XLOC_247554 | 1489 coding | coding    | coding    | noncoding |
| MSTRG. 238415. 1  |              | XLOC_247572 | 274 coding  | noncoding | noncoding | noncoding |
| MSTRG. 238441. 4  | LOC107987425 | XLOC_247642 | 1145 coding | noncoding | coding    | coding    |
| NR_103502. 1_1    | LILRA1       | XLOC_247656 | 2162 coding | coding    | coding    | noncoding |
| NM_001083899. 2_1 | GP6          | XLOC_247698 | 2268 coding | coding    | coding    | coding    |
| NM_001083899. 2_2 | GP6          | XLOC_247744 | 2268 coding | coding    | coding    | coding    |
| NM_001083899. 2_3 | GP6          | XLOC_247783 | 2268 coding | coding    | coding    | coding    |
| NR_145325. 1_4    | NLRP2        | XLOC_247797 | 3777 coding | coding    | coding    | coding    |
| NM_001083899. 2_4 | GP6          | XLOC_247814 | 2268 coding | coding    | coding    | coding    |
| NR_145325. 1_5    | NLRP2        | XLOC_247831 | 3777 coding | coding    | coding    | coding    |
| NM_001083899. 2_5 | GP6          | XLOC_247848 | 2268 coding | coding    | coding    | coding    |
| NR_145325. 1_6    | NLRP2        | XLOC_247860 | 3777 coding | coding    | coding    | coding    |
| NM_001083899. 2_6 | GP6          | XLOC_247876 | 2268 coding | coding    | coding    | coding    |
| NM_014516. 4_7    | CNOT3        | XLOC_247881 | 2818 coding | coding    | coding    | coding    |
| NR_145325. 1_7    | NLRP2        | XLOC_247914 | 3777 coding | coding    | coding    | coding    |
| MSTRG. 238624. 1  | LILRA2       | XLOC_247942 | 3418 coding | coding    | coding    | coding    |
| NM_001083899. 2_7 | GP6          | XLOC_247949 | 2268 coding | coding    | coding    | coding    |
| NM_001258280. 2_1 | ZNF501       | XLOC_248099 | 3353 coding | coding    | noncoding | coding    |
| NM_144638. 3_1    | TMEM42       | XLOC_248102 | 977 coding  | noncoding | coding    | coding    |
| NM_020696. 4_1    | KIAA1143     | XLOC_248117 | 5079 coding | coding    | coding    | coding    |
| MSTRG. 238718. 1  |              | XLOC_248121 | 231 coding  | noncoding | noncoding | noncoding |
| MSTRG. 238729. 1  |              | XLOC_248130 | 282 coding  | noncoding | noncoding | noncoding |
| MSTRG. 238732. 1  |              | XLOC_248162 | 261 coding  | noncoding | noncoding | noncoding |
| MSTRG. 238765. 13 | CCDC84       | XLOC_248173 | 585 coding  | coding    | coding    | noncoding |
| XR_001756822. 1   | CCDC84-DT    | XLOC_248179 | 1241 coding | noncoding | noncoding | noncoding |
| MSTRG. 238781. 1  | FBL          | XLOC_248190 | 894 coding  | coding    | coding    | coding    |
| MSTRG. 238816. 1  |              | XLOC_248236 | 268 coding  | noncoding | noncoding | noncoding |
| MSTRG. 238864. 1  |              | XLOC_248305 | 314 coding  | noncoding | noncoding | noncoding |
| MSTRG. 238912. 3  | LOC107984485 | XLOC_248345 | 5944 coding | coding    | coding    | noncoding |
| MSTRG. 238887. 1  | BCL2L14      | XLOC_248346 | 265 coding  | noncoding | noncoding | noncoding |
| MSTRG. 238917. 1  | MLXIP        | XLOC_248359 | 1521 coding | noncoding | noncoding | noncoding |
| MSTRG. 238925. 1  | BAGE5        | XLOC_248378 | 260 coding  | noncoding | noncoding | noncoding |

|                   |              |             |              |           |           |           |
|-------------------|--------------|-------------|--------------|-----------|-----------|-----------|
| MSTRG. 238921. 1  |              | XLOC_248382 | 498 coding   | noncoding | noncoding | noncoding |
| MSTRG. 238924. 1  | BAGE5        | XLOC_248383 | 314 coding   | noncoding | noncoding | noncoding |
| NM_199357. 2_1    | ARHGAP11A    | XLOC_248450 | 2485 coding  | coding    | coding    | coding    |
| NM_001368078. 1_1 | GOLGA8G      | XLOC_248465 | 5276 coding  | coding    | coding    | coding    |
| MSTRG. 239024. 3  | IGKV7-3      | XLOC_248541 | 339 coding   | coding    | noncoding | noncoding |
| MSTRG. 239035. 1  |              | XLOC_248569 | 337 coding   | noncoding | noncoding | noncoding |
| NM_199357. 2_2    | ARHGAP11A    | XLOC_248592 | 2485 coding  | coding    | coding    | coding    |
| MSTRG. 239091. 1  | LOC105374498 | XLOC_248629 | 252 coding   | noncoding | noncoding | noncoding |
| MSTRG. 239107. 1  |              | XLOC_248657 | 252 coding   | noncoding | noncoding | noncoding |
| MSTRG. 239164. 1  |              | XLOC_248738 | 249 coding   | noncoding | noncoding | noncoding |
| NM_172241. 3_1    | CTAGE1       | XLOC_248775 | 4317 coding  | noncoding | coding    | coding    |
| MSTRG. 239238. 2  | MRPS12       | XLOC_248801 | 847 coding   | coding    | coding    | coding    |
| NM_002457. 4_1    | MUC2         | XLOC_248821 | 16050 coding | coding    | noncoding | coding    |
| NM_001348386. 3_5 | CYP2D7       | XLOC_248833 | 2274 coding  | coding    | coding    | coding    |
| MSTRG. 239253. 1  | SHANK3       | XLOC_248840 | 240 coding   | noncoding | noncoding | noncoding |
| MSTRG. 239269. 1  |              | XLOC_248868 | 254 coding   | noncoding | noncoding | noncoding |
| MSTRG. 239258. 1  |              | XLOC_248871 | 305 coding   | noncoding | noncoding | noncoding |
| XM_024452591. 1   | LOC112268350 | XLOC_248899 | 2678 coding  | coding    | coding    | coding    |
| XM_024452590. 1   | LOC112268349 | XLOC_248900 | 2678 coding  | coding    | coding    | coding    |
| MSTRG. 239303. 3  | GUSBP1       | XLOC_248909 | 999 coding   | coding    | coding    | noncoding |
| MSTRG. 239303. 2  | GUSBP1       | XLOC_248909 | 824 coding   | noncoding | coding    | noncoding |
| XM_024452586. 1   | LOC112268346 | XLOC_248912 | 1982 coding  | coding    | coding    | coding    |
| MSTRG. 239290. 1  |              | XLOC_248931 | 266 coding   | noncoding | noncoding | noncoding |
| MSTRG. 239338. 1  | RUFY1        | XLOC_248940 | 301 coding   | noncoding | noncoding | noncoding |
| NM_001746. 4_1    | CANX         | XLOC_248949 | 4915 coding  | coding    | coding    | coding    |
| NM_014757. 5_1    | MAML1        | XLOC_248950 | 5748 coding  | coding    | coding    | coding    |
| MSTRG. 239335. 5  | RUFY1        | XLOC_248963 | 971 coding   | coding    | coding    | noncoding |
| NM_001364244. 2_1 | HNRNPH1      | XLOC_248965 | 2205 coding  | coding    | coding    | coding    |
| NM_001364237. 2_1 | HNRNPH1      | XLOC_248965 | 2580 coding  | coding    | coding    | coding    |
| NM_001364253. 1_1 | HNRNPH1      | XLOC_248965 | 2683 coding  | coding    | coding    | coding    |
| NM_020899. 4_1    | ZBTB4        | XLOC_248995 | 5930 coding  | coding    | coding    | coding    |
| MSTRG. 239380. 3  | POLR2A       | XLOC_248996 | 2237 coding  | coding    | coding    | coding    |
| MSTRG. 239386. 1  |              | XLOC_249102 | 814 coding   | coding    | noncoding | noncoding |
| MSTRG. 239391. 3  | NCR1         | XLOC_249109 | 449 coding   | noncoding | noncoding | noncoding |
| MSTRG. 239394. 1  |              | XLOC_249136 | 702 coding   | noncoding | noncoding | noncoding |
| MSTRG. 239396. 1  | LOC105377641 | XLOC_249138 | 261 coding   | noncoding | noncoding | noncoding |
| MSTRG. 239440. 1  |              | XLOC_249194 | 263 coding   | noncoding | noncoding | noncoding |
| NM_213651. 3_1    | SLC25A24     | XLOC_249232 | 4201 coding  | coding    | coding    | coding    |
| MSTRG. 239493. 1  |              | XLOC_249252 | 247 coding   | noncoding | noncoding | noncoding |
| MSTRG. 239565. 1  |              | XLOC_249327 | 246 coding   | noncoding | noncoding | noncoding |
| MSTRG. 239627. 13 | RRN3P1       | XLOC_249351 | 3226 coding  | coding    | coding    | noncoding |
| MSTRG. 239627. 21 | RRN3P1       | XLOC_249351 | 3634 coding  | coding    | coding    | noncoding |
| MSTRG. 239564. 1  |              | XLOC_249360 | 246 coding   | noncoding | noncoding | noncoding |

|                   |              |             |             |           |           |           |
|-------------------|--------------|-------------|-------------|-----------|-----------|-----------|
| MSTRG. 239610. 1  | LOC100507443 | XLOC_249414 | 279 coding  | noncoding | noncoding | noncoding |
| MSTRG. 239619. 1  | LOC105374924 | XLOC_249432 | 280 coding  | noncoding | noncoding | noncoding |
| MSTRG. 239651. 3  | EPHA1        | XLOC_249473 | 3382 coding | coding    | coding    | coding    |
| MSTRG. 239800. 5  | CPSF1        | XLOC_249608 | 270 coding  | noncoding | noncoding | noncoding |
| MSTRG. 239815. 1  |              | XLOC_249627 | 289 coding  | noncoding | noncoding | noncoding |
| MSTRG. 239857. 1  |              | XLOC_249646 | 265 coding  | noncoding | noncoding | noncoding |
| MSTRG. 239932. 1  | SOX7         | XLOC_249677 | 237 coding  | noncoding | noncoding | noncoding |
| NM_001369759. 1_1 | PRAG1        | XLOC_249754 | 5310 coding | coding    | coding    | coding    |
| XR_002959144. 1   | LOC112268389 | XLOC_249771 | 3087 coding | coding    | coding    | noncoding |
| MSTRG. 240111. 1  | LOC100506990 | XLOC_249775 | 232 coding  | noncoding | noncoding | noncoding |
| MSTRG. 240086. 1  |              | XLOC_249783 | 241 coding  | noncoding | noncoding | noncoding |
| MSTRG. 240126. 1  | LOC105379289 | XLOC_249793 | 264 coding  | noncoding | noncoding | noncoding |
| MSTRG. 239814. 1  |              | XLOC_249814 | 289 coding  | noncoding | noncoding | noncoding |
| MSTRG. 239858. 1  |              | XLOC_249855 | 238 coding  | noncoding | noncoding | noncoding |
| MSTRG. 239874. 4  | CTSB         | XLOC_249860 | 2203 coding | coding    | coding    | coding    |
| MSTRG. 240072. 1  | FAM86B3P     | XLOC_249966 | 222 coding  | noncoding | noncoding | noncoding |
| MSTRG. 240075. 1  | FAM85B       | XLOC_249968 | 385 coding  | noncoding | noncoding | noncoding |
| MSTRG. 240076. 1  | FAM85B       | XLOC_249969 | 275 coding  | noncoding | noncoding | noncoding |
| MSTRG. 240087. 1  |              | XLOC_250003 | 241 coding  | noncoding | noncoding | noncoding |
| MSTRG. 240136. 1  | LONRF1       | XLOC_250008 | 417 coding  | noncoding | noncoding | noncoding |
| MSTRG. 240153. 1  |              | XLOC_250037 | 279 coding  | noncoding | noncoding | noncoding |
| MSTRG. 240157. 1  |              | XLOC_250043 | 265 coding  | noncoding | noncoding | noncoding |
| MSTRG. 240219. 2  | NEDD8-MDP1   | XLOC_250079 | 746 coding  | coding    | noncoding | noncoding |
| MSTRG. 240219. 5  | NEDD8-MDP1   | XLOC_250079 | 694 coding  | coding    | noncoding | noncoding |
| MSTRG. 240219. 4  | NEDD8-MDP1   | XLOC_250079 | 693 coding  | coding    | noncoding | noncoding |
| NR_023924. 2_1    | DHRS4-AS1    | XLOC_250095 | 2852 coding | noncoding | coding    | noncoding |
| MSTRG. 240278. 1  |              | XLOC_250182 | 294 coding  | noncoding | noncoding | noncoding |
| MSTRG. 240397. 1  |              | XLOC_250297 | 316 coding  | noncoding | noncoding | noncoding |
| MSTRG. 240408. 1  | LSP1         | XLOC_250323 | 299 coding  | noncoding | noncoding | noncoding |
| MSTRG. 240505. 4  | UBL7         | XLOC_250437 | 1319 coding | coding    | noncoding | noncoding |
| NM_001146030. 2_1 | SEMA7A       | XLOC_250443 | 3278 coding | coding    | coding    | coding    |
| NM_001286739. 1_1 | UBL7         | XLOC_250445 | 1451 coding | coding    | coding    | coding    |
| MSTRG. 240562. 1  |              | XLOC_250477 | 306 coding  | noncoding | noncoding | noncoding |
| MSTRG. 240604. 1  | NIPA1        | XLOC_250490 | 265 coding  | noncoding | noncoding | noncoding |
| MSTRG. 240517. 1  |              | XLOC_250508 | 231 coding  | noncoding | noncoding | noncoding |
| MSTRG. 240565. 1  |              | XLOC_250535 | 223 coding  | noncoding | noncoding | noncoding |
| MSTRG. 240596. 1  | WHAMMP3      | XLOC_250563 | 271 coding  | coding    | noncoding | noncoding |
| MSTRG. 240611. 1  |              | XLOC_250578 | 257 coding  | noncoding | noncoding | noncoding |
| MSTRG. 240636. 1  | SLC5A11      | XLOC_250603 | 238 coding  | noncoding | noncoding | noncoding |
| MSTRG. 240684. 1  | PODNL1       | XLOC_250655 | 282 coding  | noncoding | coding    | noncoding |
| NR_045214. 1_1    | LOC100507373 | XLOC_250665 | 2888 coding | coding    | coding    | noncoding |
| NM_001008701. 3_1 | ADGRL1       | XLOC_250682 | 7835 coding | coding    | coding    | coding    |
| MSTRG. 240700. 1  |              | XLOC_250683 | 284 coding  | noncoding | noncoding | noncoding |

|                   |          |             |             |           |           |           |
|-------------------|----------|-------------|-------------|-----------|-----------|-----------|
| MSTRG. 240713. 1  |          | XLOC_250686 | 249 coding  | noncoding | noncoding | noncoding |
| MSTRG. 240742. 12 | RNA45SN1 | XLOC_250701 | 4223 coding | noncoding | coding    | noncoding |
| MSTRG. 240742. 11 | RNA45SN1 | XLOC_250701 | 4223 coding | noncoding | coding    | noncoding |
| MSTRG. 240742. 13 | RNA45SN1 | XLOC_250701 | 5324 coding | noncoding | coding    | noncoding |
| MSTRG. 240742. 14 | RNA45SN1 | XLOC_250701 | 3191 coding | noncoding | coding    | noncoding |
| MSTRG. 240742. 15 | RNA45SN1 | XLOC_250701 | 1704 coding | noncoding | coding    | noncoding |

---
