# Supplementary material for: Whole-Transcriptome RNA Sequencing Reveals Significant Differentially Expressed mRNAs, miRNAs, and lncRNAs and Related Regulating Biological Pathways in the Peripheral Blood of COVID-19 Patients
Source: Mediators Inflamm. 2021 Apr 1;2021:6635925. doi: 10.1155/2021/6635925 (PMC8018221; doi:10.1155/2021/6635925)
Supplement: Supplementary Materials — Table S1: the differentially expressed mRNAs of peripheral blood samples in COVID-19 patients. Table S2: the differentially expressed miRNA of peripheral blood samples in COVID-19 patients. Table S3: the differentially expressed lncRNAs of peripheral blood samples in COVID-19 patients. [file 6635925.f1.zip]

Archive with 3 entries (3 files):
- Table S1 (1).pdf
- Table S2.doc
- Table S3.doc
